# Supplementary material for: Genetic regulatory subnetworks and key regulating genes in rat hippocampus perturbed by prenatal malnutrition: implications for major brain disorders
Source: Aging (Albany NY). 2020 May 11;12(9):8434–58. doi: 10.18632/aging.103150 (PMC7244046; doi:10.18632/aging.103150)
Supplement: Supplementary Figures [file aging-12-103150-s007.pdf]

## SUPPLEMENTARY FIGURES

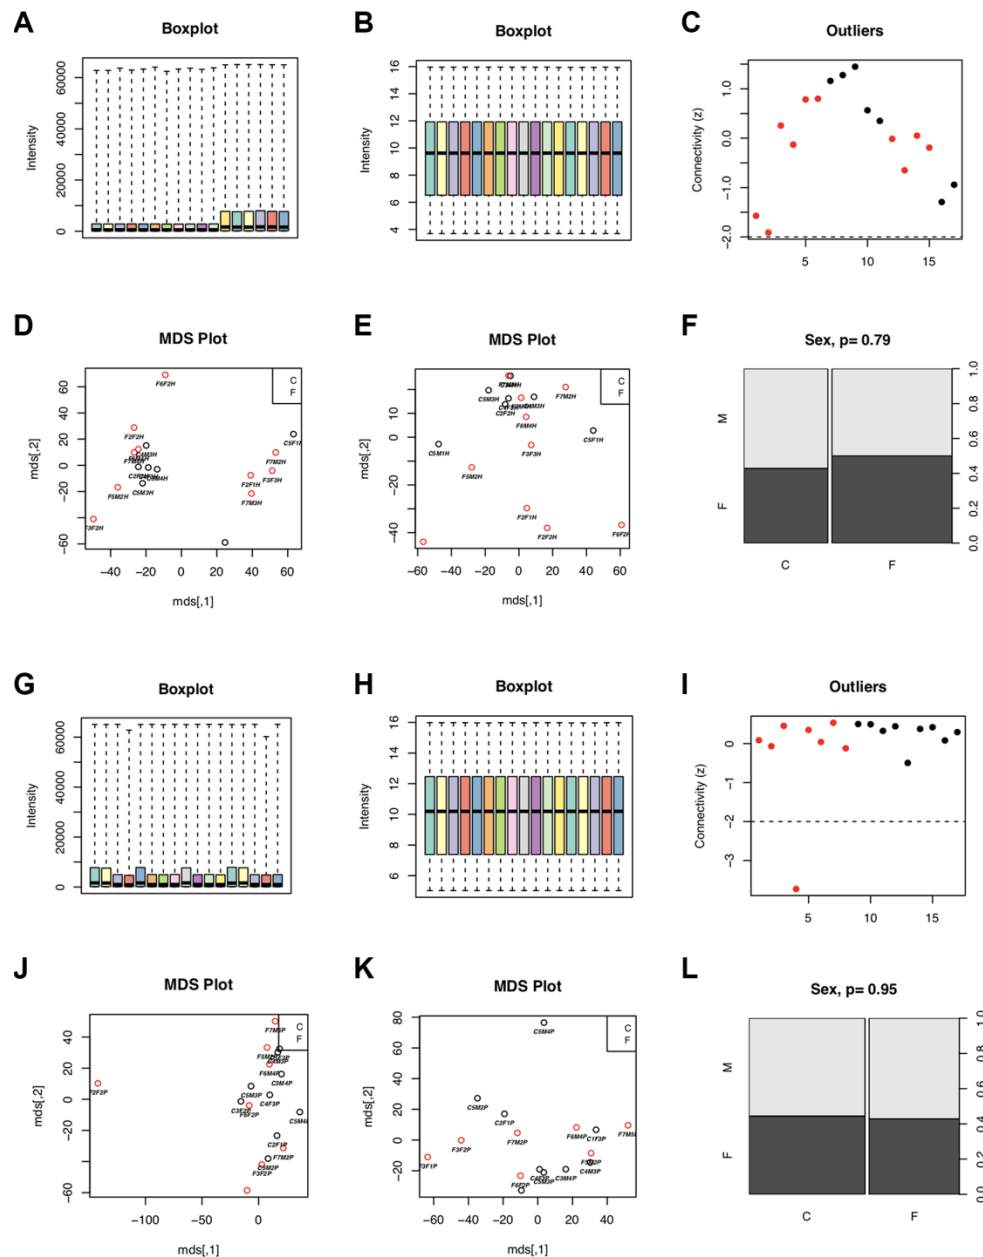

**Supplementary Figure 1. Quality control and data preprocessing.** (A, B) Pre- and post-normalization of expression profiles in hippocampus; (C) Detection of outlier based on standardized network connectivity z-scores in hippocampus; (D, E) Pre- and post-processing of batch effect in hippocampus; (F) Gender distribution for hippocampus samples between two groups treated with different prenatal nutritional status; (G, H) Pre- and post-normalization of expression profiles in prefrontal cortex. (I) Detection of outlier based on standardized network connectivity z-scores in prefrontal cortex. (J, K) Pre- and post-processing of batch effect in prefrontal cortex. (L) Gender distribution for prefrontal cortex samples between two groups treated with different prenatal nutritional status.

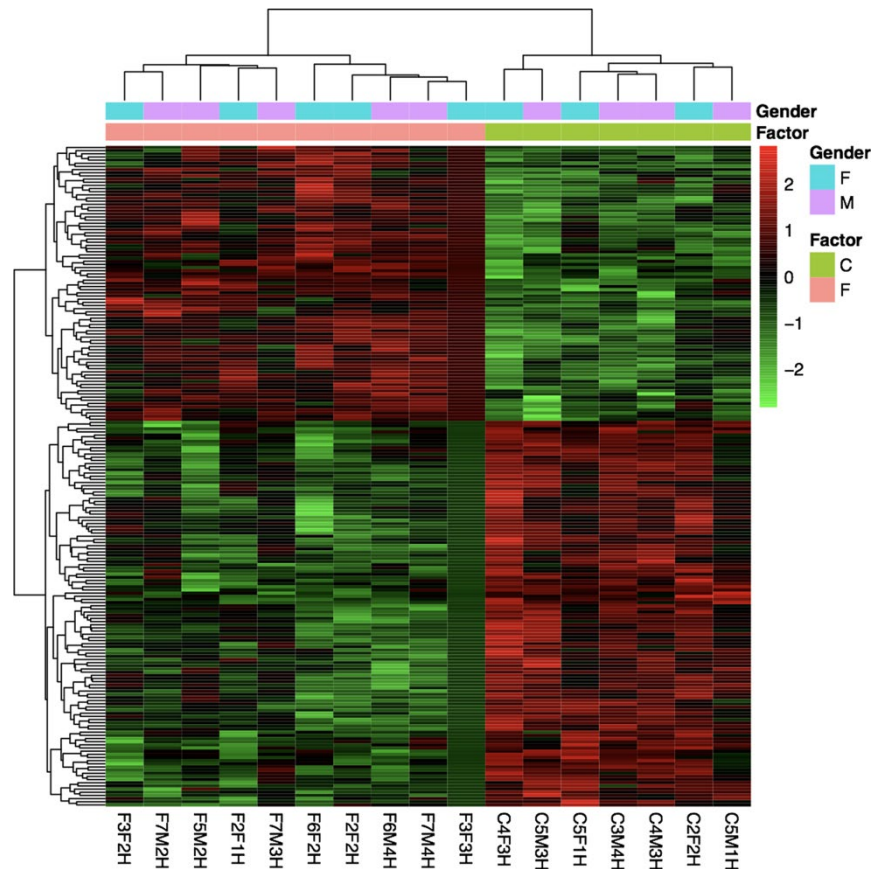

**Supplementary Figure 2.** Heatmap of 209 differentially expressed gene in hippocampus (Factor: C, control offspring; F, famine offspring, Gender: M, Male; F, Female).

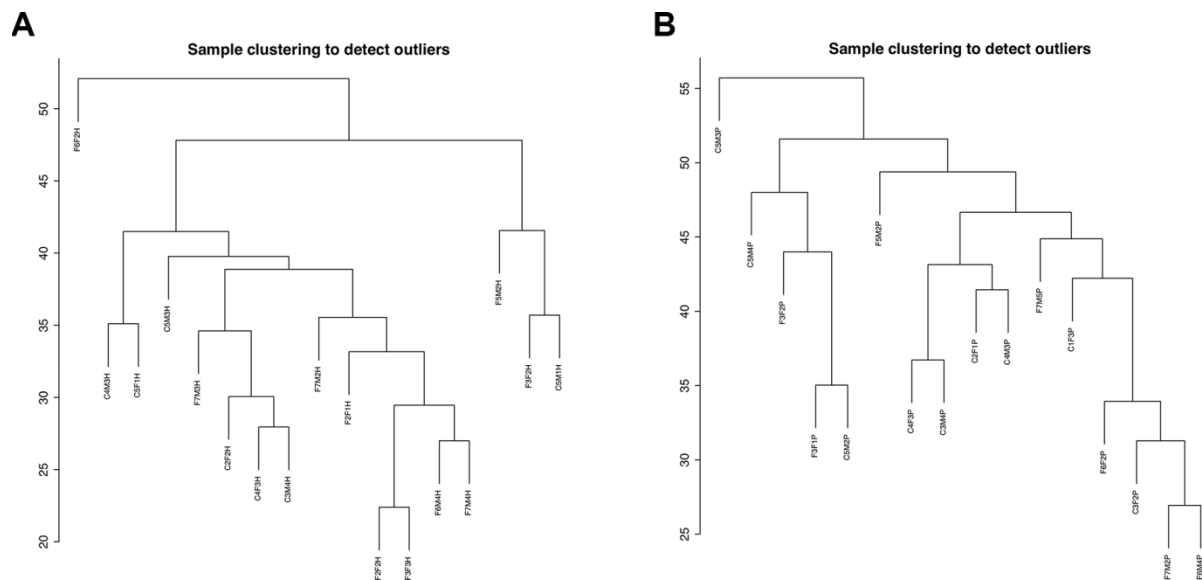

**Supplementary Figure 3.** Sample clustering analysis for detecting outliers in the hippocampus (A) and prefrontal cortex (B).

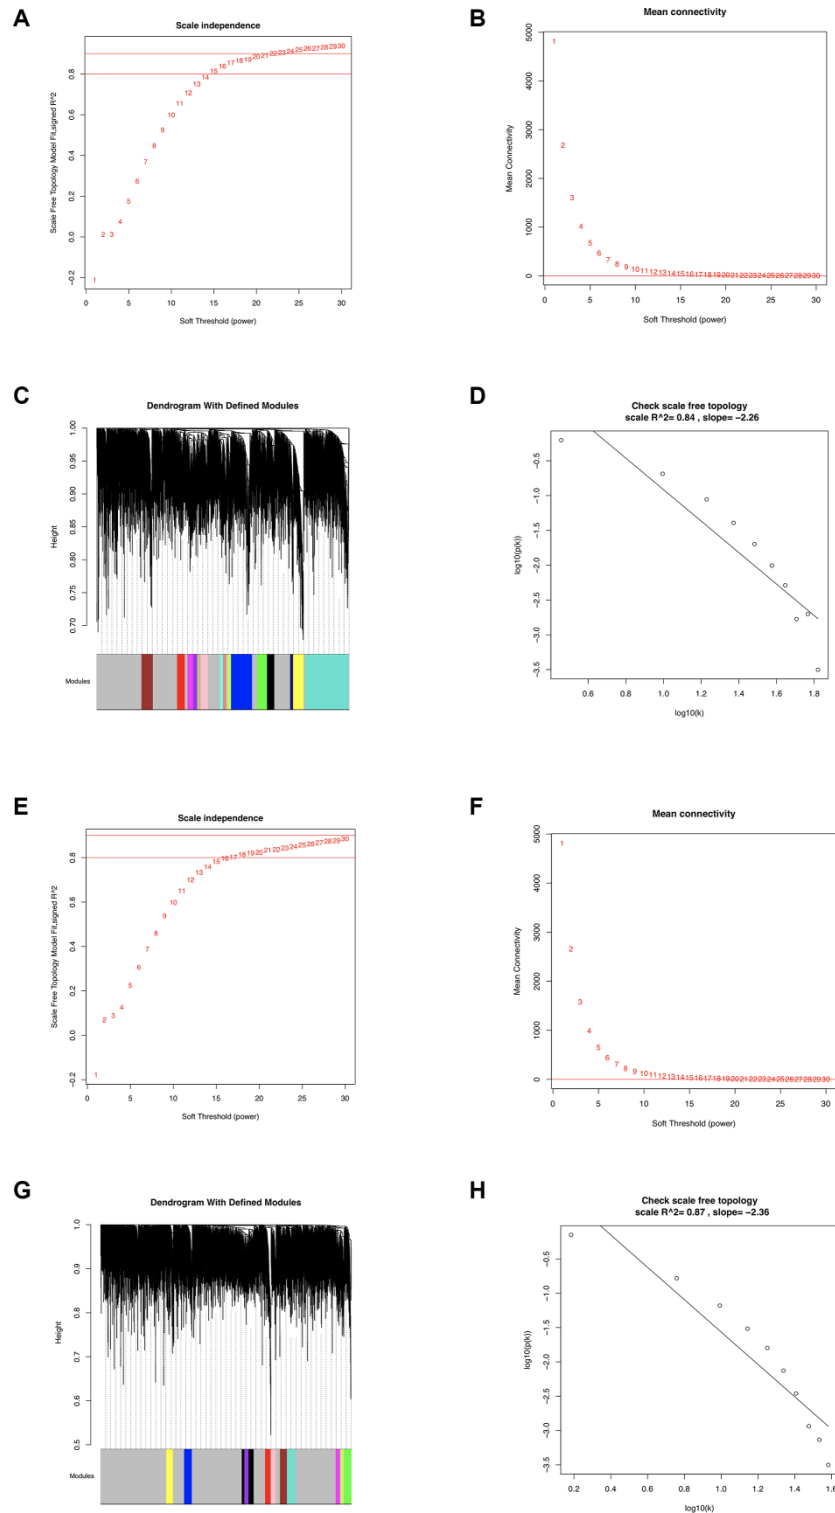

**Supplementary Figure 4. Parameter selection for construction of weighted gene co-expression network in hippocampus and prefrontal cortex.** (A) Selection of the scale-free fit index based on different soft-threshold powers ( $\beta$ ) in hippocampus ( $\beta$  15 was determined); (B) Selection of the mean connectivity of different soft-threshold powers in hippocampus; (C) Dendrogram of 9553 expressed genes clustered based on a dissimilarity measure (1-TOM) in hippocampus; (D) Check of scale-free topology with soft-threshold power  $\beta$  equaling 15 in hippocampus; (E) Selection of the scale-free fit index based on different soft-threshold powers ( $\beta$ ) in prefrontal cortex ( $\beta$  17 was determined); (F) Selection of the mean connectivity of different soft-threshold powers in prefrontal cortex; (G) Dendrogram of 9553 expressed genes clustered based on a dissimilarity measure (1-TOM) in prefrontal cortex; (H) Check of scale-free topology with soft-threshold power  $\beta$  equaling 17 in prefrontal cortex.

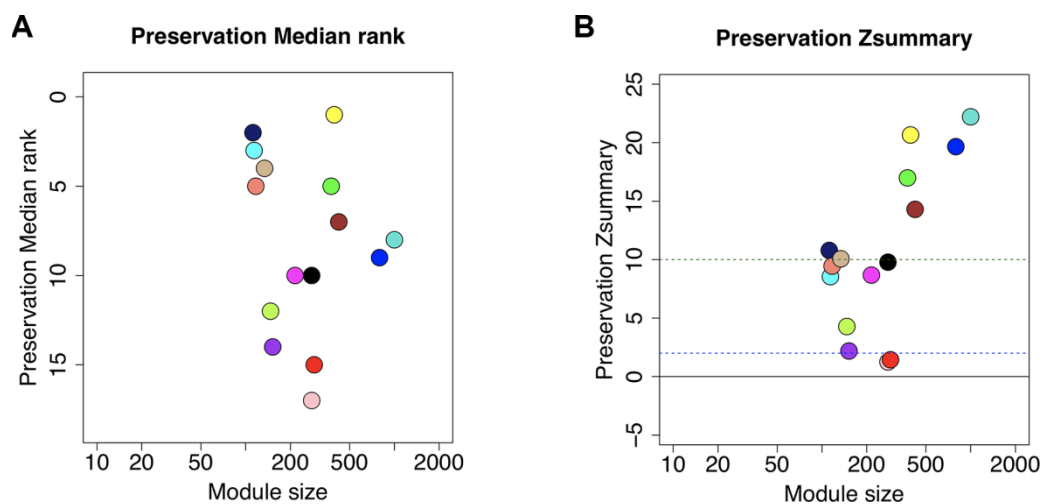

**Supplementary Figure 5. Module preservation analysis between hippocampus and prefrontal cortex.** The Y-axis represents preserved values and the X-axis represents module size. (A) median Rank test; and (B) Z summary statistics test.

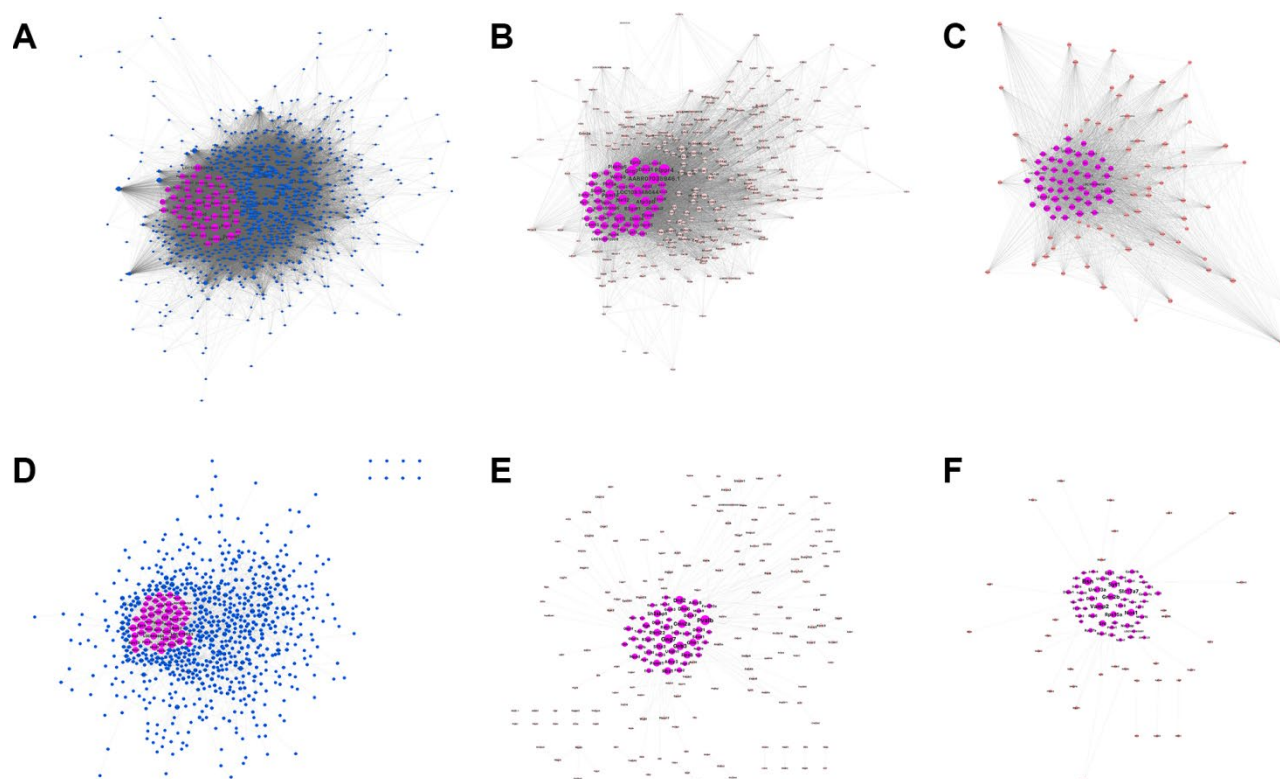

**Supplementary Figure 6. Co-expression (A–C) and PPI networks (D–F) for the corresponding blue, pink, and salmon modules.**

**A**

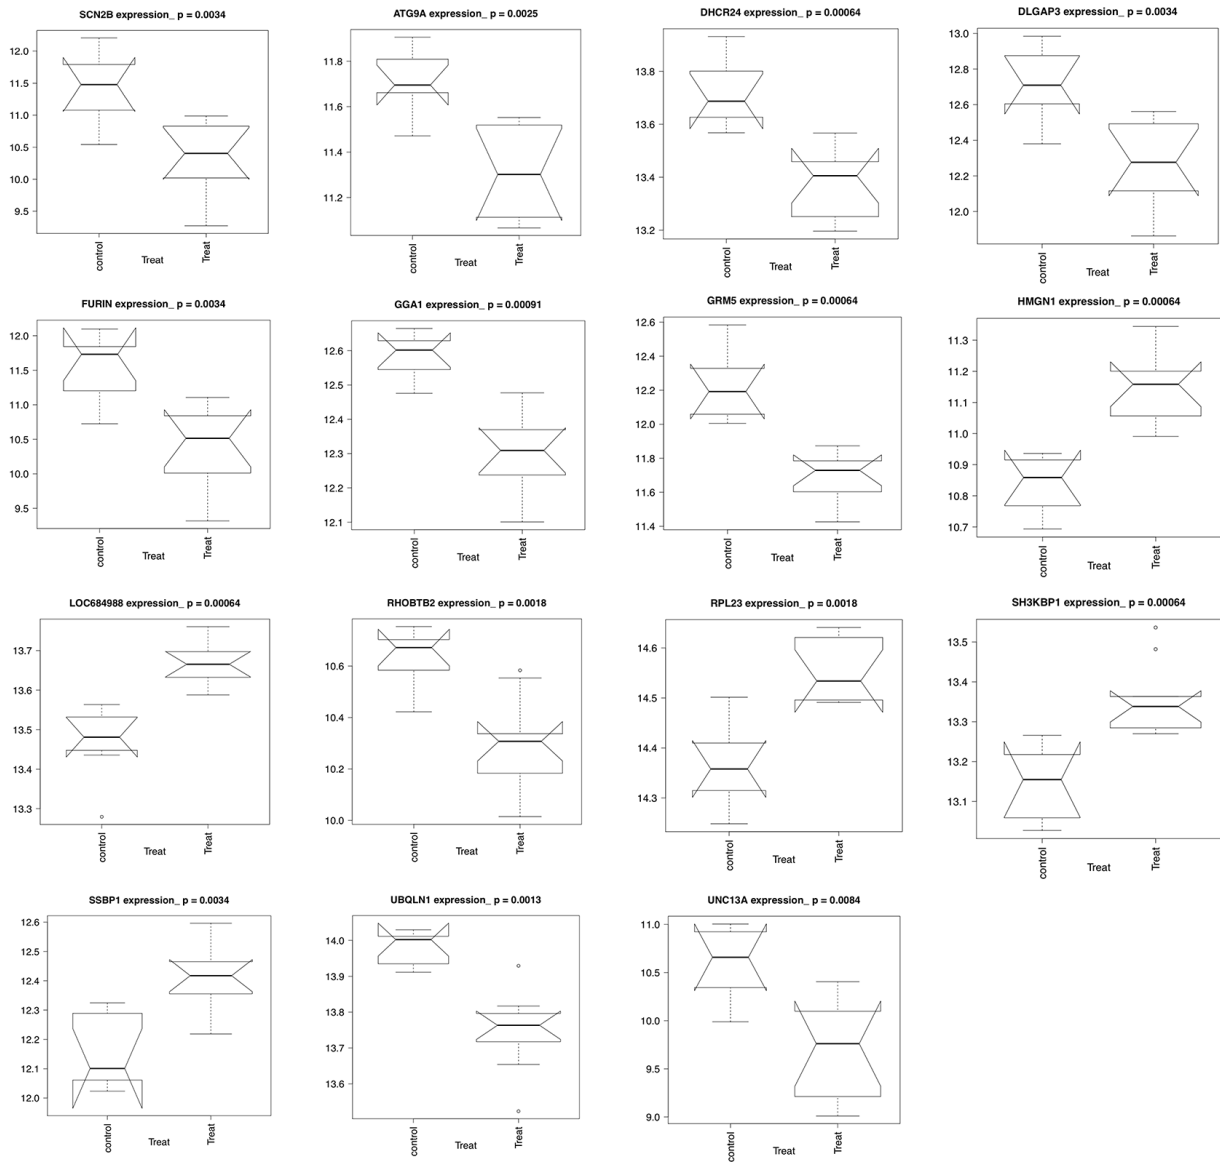

**B**

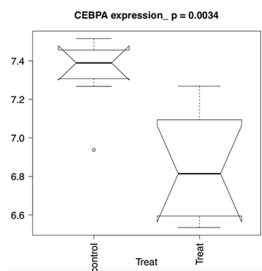

**Supplementary Figure 7.** Differentially expressed hub genes (A), and transcription factors (B) between two groups related to prenatal nutritional status in the interesting modules.
