# Supplementary material for: Genetic regulatory subnetworks and key regulating genes in rat hippocampus perturbed by prenatal malnutrition: implications for major brain disorders
Source: Aging (Albany NY). 2020 May 11;12(9):8434–58. doi: 10.18632/aging.103150 (PMC7244046; doi:10.18632/aging.103150)
Supplement: Supplementary Table 1 [file aging-12-103150-s010.xlsx]

## Sheet: hippocampus
substanceBXH	geneSymbol	LocusLinkID	moduleColor	GS.Factor	p.GS.Factor	MM.blue	p.MM.blue	MM.salmon	p.MM.salmon	MM.pink	p.MM.pink	MM.cyan	p.MM.cyan	MM.red	p.MM.red	MM.green	p.MM.green	MM.greenyellow	p.MM.greenyellow	MM.tan	p.MM.tan	MM.purple	p.MM.purple	MM.grey	p.MM.grey	MM.magenta	p.MM.magenta	MM.black	p.MM.black	MM.midnightblue	p.MM.midnightblue	MM.yellow	p.MM.yellow	MM.turquoise	p.MM.turquoise	MM.brown	p.MM.brown
ENSRNOG00000006784	Sema4f	29745	black	-0.616311	0.0084227	0.66602	0.00351323	0.550279	0.0220917	0.17097	0.511764	0.637928	0.0058636	-0.242775	0.347784	-0.794701	0.00013816	-0.376867	0.135928	0.189538	0.466244	0.00194484	0.994089	-0.103191	0.693496	-0.306098	0.232129	0.722376	0.00105603	-0.549231	0.0223988	-0.446923	0.0720869	0.113602	0.664197	-0.339969	0.18183
ENSRNOG00000002210	Hsd17b11	289456	black	0.586712	0.0132964	-0.710745	0.00138363	-0.469126	0.0574723	-0.0240972	0.926857	-0.529261	0.0289097	0.108717	0.677889	0.835502	2.98e-05	0.300737	0.240826	-0.00875556	0.973395	0.258752	0.31595	0.0449802	0.863895	0.483436	0.0493016	-0.84366	2.08e-05	0.657374	0.00413541	0.436631	0.0797146	-0.337518	0.185204	0.454076	0.0671104
ENSRNOG00000019448	Lipf	50682	black	-0.54032	0.0251458	0.515763	0.0340753	0.333106	0.191379	0.155695	0.550702	0.435736	0.0804044	-0.127293	0.626362	-0.562621	0.0187162	-0.150982	0.562973	0.0587101	0.822896	-0.160359	0.538676	-0.0528795	0.84026	-0.165554	0.525422	0.489393	0.0461703	-0.499489	0.0412091	-0.37294	0.140386	0.247856	0.33747	-0.188265	0.469299
ENSRNOG00000039919	Olr1132	405344	black	0.499979	0.0409786	-0.195545	0.451962	-0.0266137	0.919241	-0.0876664	0.737949	-0.183093	0.481813	-0.0684076	0.79419	0.271773	0.291323	-0.156043	0.549802	-0.0149637	0.954545	0.0916356	0.726503	-0.0255465	0.92247	0.070595	0.787748	-0.226829	0.381304	0.0933327	0.721625	-0.0580725	0.824791	0.118574	0.650361	0.17238	0.508238
ENSRNOG00000017209	Tubb3	246118	black	-0.489055	0.0463437	0.600109	0.0108714	0.321095	0.208873	-0.00515156	0.984345	0.363932	0.150992	-0.0449235	0.864065	-0.546625	0.0231766	0.00770604	0.976583	-0.0998141	0.703091	-0.13919	0.594181	0.0854702	0.744305	-0.482525	0.0497942	0.724466	0.00100458	-0.342882	0.177874	-0.229161	0.376295	-0.0660575	0.801126	-0.201914	0.437067
ENSRNOG00000016122	Hmgcr	25675	black	-0.484113	0.0489378	0.550466	0.0220373	0.459117	0.0637585	0.0844464	0.747273	0.576075	0.0155109	-0.0252214	0.923454	-0.711801	0.00135082	-0.250159	0.332853	0.180497	0.488154	-0.0288099	0.9126	0.0445892	0.865068	-0.351913	0.165977	0.689261	0.00220793	-0.44619	0.072612	-0.40832	0.103704	-0.00960896	0.970803	-0.399144	0.112477
ENSRNOG00000010063	Htr2a	29595	black	-0.47971	0.0513392	0.705175	0.00156781	0.496467	0.0426495	0.0357774	0.891568	0.575232	0.015698	-0.131208	0.615699	-0.832564	3.37e-05	-0.333001	0.191528	0.0512154	0.845229	-0.24994	0.333289	-0.104132	0.69083	-0.447231	0.0718675	0.838973	2.56e-05	-0.690977	0.00213001	-0.537312	0.0261298	0.349656	0.168899	-0.434783	0.0811437
ENSRNOG00000000435	Ppt2	54398	black	-0.477394	0.0526372	-0.0275239	0.916488	0.0306895	0.90692	0.438912	0.0779756	-0.177112	0.496481	-0.413882	0.09863	0.308005	0.229085	-0.0612263	0.815426	0.0700879	0.789241	0.411844	0.100469	0.108989	0.677125	0.430881	0.0842234	-0.518073	0.0331447	0.387651	0.124188	0.388089	0.123727	-0.188508	0.468714	0.347694	0.171467
ENSRNOG00000031081	Stat2	288774	black	-0.470875	0.0564233	0.299617	0.24267	0.0230346	0.930075	-0.200793	0.43967	0.167843	0.51963	0.18564	0.47563	-0.578452	0.0149925	0.0608481	0.816548	-0.169217	0.516168	-0.27646	0.282751	0.11783	0.652426	-0.56344	0.0185073	0.692194	0.00207616	-0.308689	0.227999	0.0922382	0.724769	0.0386023	0.883059	-0.494166	0.0437717
ENSRNOG00000010977	Igfbp6	25641	black	-0.468955	0.057576	0.555575	0.0205896	0.297126	0.246799	-0.132926	0.61104	0.36951	0.144363	-0.0382281	0.884186	-0.76821	0.000315881	-0.236439	0.360896	-0.123012	0.638103	-0.344563	0.175618	-0.0986197	0.706495	-0.566809	0.0176674	0.841235	2.32e-05	-0.689552	0.00219454	-0.424907	0.0890999	0.47075	0.0564975	-0.457489	0.0648269
ENSRNOG00000061230	L1cam	50687	black	-0.462759	0.0614153	0.535517	0.0267307	0.320601	0.209615	-0.0966639	0.71208	0.491511	0.045094	0.0751764	0.774299	-0.738328	0.000713181	-0.0938624	0.720105	-0.00147357	0.995522	-0.211177	0.415862	0.0211127	0.935897	-0.52766	0.0294886	0.845767	1.89e-05	-0.513768	0.0348949	-0.351073	0.167061	0.0761724	0.771383	-0.453464	0.0675262
ENSRNOG00000005331	Vapb	60431	black	-0.459026	0.0638182	0.411179	0.101073	0.125671	0.630801	-0.0741809	0.777216	0.257253	0.318861	0.166835	0.522178	-0.515253	0.0342833	0.159159	0.54176	-0.0962128	0.71337	-0.228363	0.378006	0.0690385	0.792331	-0.429158	0.0856093	0.619867	0.00794953	-0.352653	0.165028	-0.137146	0.599661	-0.116115	0.657191	-0.288043	0.262229
ENSRNOG00000061031	Fzd8	364754	black	-0.455884	0.0658935	0.533018	0.0275855	0.244604	0.344052	-0.204891	0.430191	0.34795	0.171131	0.0682661	0.794608	-0.764096	0.000355779	-0.152709	0.558465	-0.156338	0.549037	-0.420888	0.0924934	-0.0927672	0.723249	-0.612524	0.00895101	0.869888	5.69e-06	-0.673511	0.00303782	-0.380108	0.132321	0.457251	0.0649845	-0.488193	0.0467885
ENSRNOG00000000925	Psph	304429	black	0.447527	0.0716568	-0.563023	0.0186135	-0.174273	0.503518	0.187723	0.470603	-0.10379	0.691799	-0.0874792	0.73849	0.50364	0.0392908	0.00315653	0.990407	0.361004	0.154554	0.474226	0.0544524	-0.120601	0.644752	0.636106	0.00605143	-0.696937	0.00187674	0.48044	0.0509354	0.204976	0.429997	-0.442647	0.0751884	0.170018	0.514154
ENSRNOG00000019412	Rhbg	310625	black	-0.44388	0.0742842	0.683138	0.00250512	0.464958	0.0600313	0.0386143	0.883023	0.544371	0.0238665	-0.118006	0.651937	-0.737438	0.000729484	-0.274896	0.285594	0.0363788	0.889756	-0.267994	0.298348	-0.0539056	0.837199	-0.39026	0.121458	0.7568	0.000436855	-0.561383	0.0190354	-0.38273	0.129453	0.305322	0.233376	-0.385086	0.126914
ENSRNOG00000008924	Arhgef12	367072	black	0.43266	0.0828087	-0.310044	0.225858	-0.0362035	0.890284	0.155202	0.551981	-0.173088	0.50647	0.0286506	0.913081	0.498107	0.0418632	-0.0960591	0.71381	0.207562	0.424071	0.216127	0.404759	0.235583	0.362689	0.463088	0.0612066	-0.688026	0.00226542	0.508846	0.0369816	0.348221	0.170775	-0.192246	0.459777	0.252285	0.328623
ENSRNOG00000003330	Acsf2	619561	black	0.430991	0.0841353	0.0678176	0.79593	0.00634096	0.980731	-0.422458	0.0911576	0.212917	0.411941	0.35432	0.1629	-0.38458	0.127457	-0.0330492	0.899796	-0.0602469	0.818332	-0.401448	0.110227	-0.113128	0.665522	-0.472084	0.0557064	0.562957	0.0186303	-0.389122	0.122644	-0.364293	0.150558	0.203647	0.433058	-0.417055	0.0958158
ENSRNOG00000060407	Cacna1i	56827	black	0.426677	0.0876343	0.0237664	0.927859	-0.0527351	0.840691	-0.447972	0.0713409	0.126713	0.627948	0.11753	0.653259	-0.377954	0.13471	-0.0835026	0.750013	-0.114502	0.661684	-0.326922	0.200261	-0.487901	0.0469401	-0.429211	0.0855668	0.535994	0.02657	-0.515816	0.0340536	-0.421207	0.092221	0.243937	0.34541	-0.270087	0.294444
ENSRNOG00000015420	Stxbp1	25558	black	-0.41258	0.0998015	0.615702	0.00850591	0.457596	0.0647562	0.082206	0.753781	0.52395	0.0308647	-0.15998	0.539649	-0.631705	0.00652537	-0.227498	0.379863	0.0647851	0.804886	-0.141039	0.589241	-0.162141	0.534113	-0.295977	0.248719	0.6607	0.00388627	-0.614352	0.00869286	-0.607118	0.00975078	0.267171	0.299891	-0.133121	0.610514
ENSRNOG00000012510	Olr1627	290003	black	0.412353	0.100007	-0.300678	0.240923	-0.154944	0.552651	0.0819067	0.754651	-0.384084	0.12799	-0.122904	0.638401	0.706607	0.00151863	0.0906203	0.729425	-0.0822048	0.753784	0.206393	0.426744	0.160787	0.53758	0.337123	0.185751	-0.640672	0.00558954	0.598257	0.0111839	0.333537	0.19077	-0.123895	0.635676	0.513195	0.0351333
ENSRNOG00000010694	Tpbg	83684	black	-0.405226	0.106606	0.649305	0.00479379	0.460373	0.0629427	0.000866366	0.997367	0.588587	0.0129335	0.050863	0.846282	-0.757796	0.000424953	-0.245771	0.341682	0.0731881	0.780129	-0.318764	0.212385	0.0987224	0.706202	-0.41729	0.0956099	0.77426	0.000264047	-0.552164	0.0215477	-0.405571	0.10628	0.310973	0.224397	-0.479664	0.0513647
ENSRNOG00000019096	Hsd17b3	117182	black	0.393261	0.11837	-0.540706	0.0250219	-0.225762	0.383609	0.134598	0.606522	-0.137549	0.598579	-0.140711	0.590117	0.58297	0.0140449	0.123278	0.637371	0.238768	0.356044	0.483057	0.049506	-0.107885	0.680234	0.56326	0.018553	-0.647023	0.00499463	0.618332	0.00815112	0.365823	0.148723	-0.522295	0.0314942	0.338469	0.183889
ENSRNOG00000012156	Ostf1	259275	black	0.37578	0.137152	-0.552522	0.0214456	-0.125605	0.63098	0.249578	0.334015	-0.159915	0.539817	-0.0193584	0.941214	0.622474	0.00761638	-0.0145058	0.955935	0.371935	0.141544	0.515936	0.0340047	0.140267	0.591302	0.685958	0.00236441	-0.853791	1.3e-05	0.649746	0.00475575	0.345903	0.173834	-0.453652	0.0673982	0.268688	0.297051
ENSRNOG00000009538	Etfdh	295143	black	0.375264	0.137735	-0.570489	0.0167846	-0.339074	0.183058	0.126164	0.629451	-0.450999	0.0692192	-0.174007	0.504181	0.706825	0.00151127	0.117042	0.654615	0.0419526	0.872984	0.393741	0.117881	-0.0379786	0.884937	0.52092	0.0320247	-0.795407	0.000134933	0.606222	0.00988867	0.497832	0.0419942	-0.337993	0.184547	0.449748	0.07009
ENSRNOG00000022009	Mzb1	291675	black	0.371327	0.142247	-0.425067	0.0889667	-0.214584	0.408203	0.00624998	0.981007	-0.326162	0.201371	-0.00434046	0.986809	0.609357	0.00941291	0.108089	0.679659	0.014552	0.955795	0.254897	0.323471	0.106786	0.683329	0.316609	0.215665	-0.575436	0.0156525	0.592826	0.0121416	0.373101	0.140201	-0.230299	0.373863	0.302319	0.238238
ENSRNOG00000045680	Cend1	361675	black	-0.36951	0.144362	0.296055	0.248588	-0.00794005	0.975872	-0.319679	0.211001	0.267403	0.299456	0.33779	0.184827	-0.596684	0.0114548	0.225052	0.385147	-0.183906	0.479833	-0.399893	0.111743	0.0362881	0.890029	-0.606361	0.00986717	0.818813	5.83e-05	-0.412261	0.10009	-0.118097	0.651685	0.0633935	0.809004	-0.502575	0.0397761
ENSRNOG00000013498	Pex14	64460	black	-0.363896	0.151036	0.400268	0.111376	0.159534	0.540794	-0.275505	0.284484	0.35372	0.163663	0.15088	0.56324	-0.755531	0.000452412	-0.086825	0.740382	-0.111481	0.670131	-0.365133	0.149548	-0.144977	0.578777	-0.624818	0.0073264	0.884514	2.43e-06	-0.618435	0.00813745	-0.337434	0.18532	0.298097	0.245184	-0.531344	0.0281696
ENSRNOG00000047279	Pga5	60372	black	-0.363161	0.151925	-0.172082	0.508982	0.0155083	0.952892	0.504622	0.0388469	-0.149814	0.566034	-0.188773	0.468079	0.529338	0.0288821	0.0782383	0.765343	0.216947	0.402934	0.523171	0.0311598	0.444333	0.0739539	0.61254	0.00894877	-0.748483	0.000547486	0.704471	0.00159244	0.564993	0.0181165	-0.446283	0.0725448	0.401865	0.109823
ENSRNOG00000000825	Calhm5	294431	black	-0.359721	0.156134	0.584634	0.0137081	0.595667	0.0116329	0.211419	0.415316	0.69914	0.00178964	-0.19355	0.45668	-0.678892	0.00272977	-0.496193	0.0427818	0.314122	0.21949	-0.0719055	0.783895	-0.0164614	0.950001	-0.0904337	0.729963	0.518645	0.0329171	-0.476873	0.0529326	-0.459188	0.0637123	0.332276	0.192555	-0.402617	0.109098
ENSRNOG00000021945	Ccdc184	500925	black	-0.356601	0.160019	0.210173	0.418133	-0.0705554	0.787865	-0.301185	0.240092	0.174014	0.504163	0.348369	0.17058	-0.491977	0.04486	0.304441	0.234796	-0.184799	0.477666	-0.306719	0.231135	0.0195162	0.940736	-0.551664	0.0216911	0.711939	0.00134657	-0.363351	0.151695	-0.114559	0.661527	-0.0715831	0.784843	-0.394867	0.116741
ENSRNOG00000002878	Afm	282708	black	0.354994	0.162044	-0.243614	0.346069	-0.0950408	0.716726	0.0784374	0.764762	-0.343793	0.17665	-0.205186	0.429513	0.577396	0.015221	-0.0353681	0.892802	-0.0508441	0.846339	0.224952	0.385363	0.094132	0.719331	0.296721	0.247474	-0.554977	0.0207552	0.514677	0.0345195	0.39501	0.116596	-0.0845671	0.746923	0.417216	0.0956746
ENSRNOG00000009157	Fut4	60670	black	-0.353323	0.16417	-0.108298	0.67907	-0.00312774	0.990495	0.471649	0.0559632	-0.215321	0.406556	-0.267323	0.299606	0.523244	0.0311322	0.098214	0.707653	0.106615	0.683812	0.419092	0.0940396	0.237396	0.358899	0.565411	0.0180123	-0.700464	0.00173887	0.552014	0.0215905	0.375812	0.137115	-0.291749	0.255862	0.471062	0.0563116
ENSRNOG00000005600	Nr4a2	54278	black	-0.352303	0.165477	0.365406	0.149221	0.197316	0.447794	-0.210676	0.416996	0.390163	0.121559	0.0578808	0.825361	-0.85336	1.33e-05	-0.272192	0.29055	-0.00348438	0.989411	-0.282018	0.272785	-0.171312	0.510908	-0.548775	0.0225335	0.834949	3.05e-05	-0.700393	0.00174157	-0.315439	0.217459	0.315719	0.217029	-0.648249	0.00488585
ENSRNOG00000021338	Tmem132a	338474	black	-0.349253	0.169425	0.459444	0.0635452	0.0988777	0.705759	-0.321843	0.207755	0.179676	0.490167	0.381307	0.131005	-0.640545	0.00560197	0.0993433	0.704432	-0.267333	0.299588	-0.506642	0.0379462	0.276492	0.282692	-0.761261	0.000385648	0.853931	1.29e-05	-0.43363	0.082045	-0.0398757	0.879228	0.1705	0.512944	-0.539649	0.0253629
ENSRNOG00000020194	Hes6	316626	black	-0.347324	0.171954	0.0625297	0.811562	0.0867618	0.740565	-0.127342	0.626227	0.430998	0.0841299	0.01359	0.958715	-0.568187	0.0173328	-0.0581705	0.8245	0.195944	0.451021	0.145388	0.577689	-0.27072	0.29327	-0.254878	0.323508	0.586993	0.0132416	-0.30623	0.231917	-0.174109	0.503926	-0.234451	0.365067	-0.457335	0.0649287
ENSRNOG00000017163	Pfkp	60416	black	-0.346383	0.173197	0.0543024	0.836016	0.137521	0.598654	-0.0726373	0.781746	0.483755	0.04913	-0.074393	0.776595	-0.69624	0.00190501	-0.273138	0.28881	0.295889	0.248866	0.151563	0.561455	-0.292249	0.255011	-0.191971	0.460432	0.576581	0.0153994	-0.388325	0.123479	-0.134462	0.606889	-0.100124	0.702208	-0.707707	0.00148172
ENSRNOG00000005580	Itgb4	25724	black	-0.335907	0.187443	-0.0139263	0.957694	0.125191	0.632115	0.545519	0.0235132	-0.0608033	0.816681	-0.253472	0.326276	0.495468	0.0431341	0.0243337	0.926141	0.198849	0.444203	0.366811	0.147545	0.322087	0.207391	0.638544	0.00580116	-0.701784	0.00168948	0.571026	0.0166586	0.301174	0.24011	-0.188494	0.468748	0.415866	0.0968636
ENSRNOG00000005987	Suox	81805	black	0.333968	0.190162	-0.620156	0.007912	-0.169953	0.514317	0.224304	0.38677	-0.157625	0.545712	-0.304243	0.235115	0.57122	0.0166133	-0.100122	0.702216	0.359135	0.156859	0.694374	0.00198245	-0.196656	0.449347	0.683213	0.00250126	-0.782013	0.000208183	0.589752	0.0127118	0.345445	0.174442	-0.499444	0.04123	0.340904	0.180555
ENSRNOG00000009088	Txnrd1	58819	black	-0.332553	0.192162	0.618453	0.00813498	0.395017	0.116589	-0.109313	0.676215	0.405035	0.106787	-0.0428295	0.87035	-0.765273	0.000343959	-0.31224	0.222415	-0.0493741	0.850734	-0.291887	0.255628	-0.0642211	0.806554	-0.568073	0.0173603	0.809811	8.16e-05	-0.608896	0.0094817	-0.371963	0.141511	0.283296	0.270524	-0.450528	0.0695463
ENSRNOG00000009620	Cybrd1	295669	black	0.332053	0.192873	-0.352392	0.165362	-0.083554	0.749864	0.23991	0.35368	-0.234467	0.365034	-0.234154	0.365692	0.651175	0.00463415	0.00372983	0.988665	0.15732	0.5465	0.463982	0.0606429	0.10893	0.677293	0.520903	0.0320312	-0.715898	0.00122946	0.698205	0.00182617	0.420194	0.0930886	-0.421844	0.091678	0.406554	0.105353
ENSRNOG00000004527	Lin7a	85327	black	0.330344	0.195314	-0.0195471	0.940642	-0.298847	0.243941	-0.740934	0.000667147	-0.0161712	0.950881	0.578566	0.014968	-0.433098	0.0824633	0.316092	0.216457	-0.386925	0.124956	-0.634792	0.00618995	-0.165804	0.524789	-0.824673	4.64e-05	0.84582	1.89e-05	-0.488761	0.0464951	-0.232361	0.369481	0.222709	0.390244	-0.520181	0.0323124
ENSRNOG00000013526	Rassf4	362423	black	0.329499	0.196528	-0.705305	0.0015633	-0.543837	0.024032	-0.0683248	0.794435	-0.448799	0.0707567	0.302499	0.237945	0.726337	0.000960308	0.524627	0.0306102	-0.0305831	0.907241	0.211767	0.414531	0.191317	0.461992	0.376682	0.136135	-0.664449	0.00362026	0.668624	0.00334154	0.513293	0.0350921	-0.469492	0.0572515	0.305496	0.233096
ENSRNOG00000018029	Doc2g	293654	black	0.321791	0.207832	0.0748281	0.775319	-0.112917	0.66611	-0.572705	0.0162697	0.132301	0.612734	0.28788	0.26251	-0.491802	0.0449477	0.076657	0.769965	-0.228993	0.376654	-0.444267	0.0740017	-0.348294	0.170679	-0.672808	0.00308006	0.795054	0.000136542	-0.538974	0.0255826	-0.361692	0.153713	0.197331	0.44776	-0.440956	0.0764409
ENSRNOG00000017052	Pianp	312711	black	-0.321045	0.208948	0.531081	0.0282623	0.15153	0.56154	-0.277532	0.280811	0.261546	0.310567	0.200655	0.439991	-0.636089	0.00605323	0.0629315	0.810372	-0.295552	0.24943	-0.561765	0.0189363	-0.0349582	0.894037	-0.686693	0.00232882	0.884541	2.43e-06	-0.631845	0.0065098	-0.437703	0.0788942	0.446193	0.0726097	-0.345363	0.174552
ENSRNOG00000019920	Doc2a	65031	black	-0.318182	0.213268	0.320081	0.210396	0.105202	0.687802	-0.295769	0.249067	0.328362	0.19817	0.0996179	0.70365	-0.830144	3.72e-05	-0.160921	0.537234	-0.0886204	0.735193	-0.340499	0.181106	-0.273832	0.287537	-0.622939	0.00755811	0.899733	8.82e-07	-0.73128	0.000851041	-0.384525	0.127515	0.327306	0.199702	-0.647185	0.00498012
ENSRNOG00000020828	Pde4a	25638	black	-0.315273	0.217714	0.488082	0.0468464	0.360392	0.155306	-0.0845972	0.746836	0.468484	0.0578609	0.026362	0.920002	-0.767607	0.000321486	-0.297183	0.246703	0.0606398	0.817166	-0.255166	0.322942	-0.12821	0.623857	-0.451348	0.0689776	0.771439	0.000287255	-0.700637	0.00173234	-0.57122	0.0166132	0.374894	0.138155	-0.50982	0.0365612
ENSRNOG00000008463	Rundc3b	688590	black	-0.314824	0.218406	0.279569	0.277149	0.158846	0.542566	-0.202939	0.434693	0.409773	0.102361	0.117627	0.652989	-0.742571	0.0006395	-0.107208	0.682139	0.0460195	0.860779	-0.135477	0.604153	-0.162138	0.53412	-0.50331	0.0394407	0.802483	0.00010594	-0.583183	0.0140015	-0.35108	0.167052	0.0387686	0.882559	-0.521639	0.0317465
ENSRNOG00000050857	Fut10	497619	black	0.312103	0.222628	-0.455959	0.0658438	-0.406385	0.105512	-0.0773368	0.767977	-0.548591	0.0225881	0.0515139	0.844337	0.545617	0.0234834	0.171895	0.509451	-0.171845	0.509575	0.0459536	0.860977	0.122489	0.639544	0.208899	0.421025	-0.569651	0.0169826	0.485419	0.048242	0.630565	0.00665285	-0.118414	0.650805	0.214753	0.407825
ENSRNOG00000021177	Cox8a	171335	black	0.302423	0.23807	-0.601348	0.0106662	-0.127322	0.626283	0.218563	0.399353	0.00756127	0.977023	0.0133736	0.959371	0.433225	0.0823637	-0.0303509	0.907943	0.500318	0.0408202	0.61404	0.0087365	0.101841	0.697326	0.634318	0.00624056	-0.682026	0.00256245	0.644507	0.00522382	0.389538	0.122209	-0.661392	0.00383601	-0.0188383	0.942791
ENSRNOG00000003031	Atp2b4	29600	black	-0.300464	0.241275	0.634071	0.00626704	0.245378	0.342479	-0.254951	0.323364	0.248321	0.336535	0.053485	0.838454	-0.677937	0.00278251	-0.072013	0.783579	-0.31131	0.223868	-0.528855	0.0290558	-0.101675	0.697798	-0.717933	0.00117262	0.909559	4.19e-07	-0.702175	0.00167506	-0.458974	0.0638522	0.482547	0.0497822	-0.30794	0.229187
ENSRNOG00000011891	Atp6v1b2	117596	black	-0.294925	0.250484	0.355662	0.1612	0.22269	0.390285	-0.150713	0.563676	0.445244	0.0732934	0.29195	0.25552	-0.649135	0.00480854	-0.0274521	0.916705	0.0535261	0.838331	-0.25233	0.328535	0.12209	0.640644	-0.465288	0.0598257	0.731349	0.000849595	-0.470082	0.0568973	-0.370953	0.14268	0.0899478	0.731363	-0.523135	0.0311733
ENSRNOG00000057102	Pafah1b2	64189	black	-0.292708	0.254231	0.148314	0.569971	-0.113308	0.665017	-0.249812	0.333547	0.0922512	0.724732	0.141279	0.588602	-0.346037	0.173656	0.315482	0.217394	-0.233168	0.367773	-0.216126	0.404761	-0.21102	0.416218	-0.432024	0.0833129	0.60684	0.00979347	-0.407683	0.104297	-0.268834	0.296777	0.0250251	0.924048	-0.130557	0.617466
ENSRNOG00000011282	Ppp2r1a	117281	black	-0.287757	0.262723	0.14871	0.56893	-0.109291	0.676277	-0.247295	0.3386	0.187781	0.470463	0.268439	0.297516	-0.460022	0.06317	0.258744	0.315967	-0.151526	0.561551	-0.354264	0.16297	-0.163043	0.53181	-0.410104	0.102057	0.608047	0.00960955	-0.417348	0.0955593	-0.227675	0.379483	0.0936658	0.720669	-0.34809	0.170947
ENSRNOG00000004640	Mtfp1	289745	black	-0.285098	0.267356	0.23784	0.357974	0.11709	0.654481	-0.264361	0.305195	0.47738	0.0526451	0.104023	0.691139	-0.838213	2.65e-05	-0.138956	0.594807	0.0741419	0.777331	-0.220467	0.395155	-0.350922	0.167256	-0.486241	0.0478081	0.869583	5.79e-06	-0.675861	0.00289996	-0.395579	0.116023	0.151175	0.562469	-0.698636	0.00180924
ENSRNOG00000000488	Hmga1	117062	black	-0.280829	0.274897	0.406618	0.105293	0.0441913	0.866262	-0.392636	0.119009	0.242694	0.347951	0.341676	0.179505	-0.694731	0.00196743	0.140855	0.589732	-0.26814	0.298074	-0.543096	0.0242634	-0.0471598	0.857362	-0.755066	0.000458226	0.942344	1.58e-08	-0.620209	0.0079051	-0.326636	0.200679	0.255306	0.322667	-0.5119	0.0356759
ENSRNOG00000015339	Shoc2	309548	black	0.279933	0.276498	-0.048048	0.854702	-0.274948	0.285499	-0.610379	0.00926186	-0.0216789	0.934181	0.417021	0.095846	-0.375829	0.137096	0.269097	0.296288	-0.298582	0.244379	-0.401699	0.109984	-0.14958	0.566646	-0.700478	0.00173833	0.713173	0.00130913	-0.328652	0.19775	-0.0169383	0.948554	-0.0627405	0.810938	-0.411916	0.100403
ENSRNOG00000006990	Grb7	84427	black	-0.271921	0.29105	0.396988	0.114612	-0.0554692	0.832539	-0.423009	0.0906914	0.0186961	0.943223	0.301157	0.240138	-0.586149	0.0134071	0.17135	0.510813	-0.455498	0.066152	-0.629187	0.0068096	0.0190253	0.942225	-0.822459	5.07e-05	0.873175	4.75e-06	-0.576522	0.0154124	-0.178878	0.492129	0.376303	0.136562	-0.413998	0.0985263
ENSRNOG00000011937	Sgtb	294708	black	-0.270733	0.293247	0.359876	0.155943	0.0897562	0.731916	-0.309473	0.226758	0.280405	0.275654	0.0822972	0.753516	-0.717642	0.00118061	-0.0314807	0.90453	-0.176653	0.497616	-0.338387	0.184003	-0.253382	0.326452	-0.629067	0.00682341	0.880538	3.1e-06	-0.702855	0.00165024	-0.383973	0.128109	0.250995	0.331187	-0.405351	0.106488
ENSRNOG00000046276	Myh3	24583	black	-0.268008	0.298322	0.335352	0.188219	0.129818	0.619476	-0.325788	0.201919	0.373509	0.139735	0.213325	0.411023	-0.840793	2.37e-05	-0.142382	0.585664	-0.0664816	0.799873	-0.389779	0.121958	-0.126979	0.627221	-0.654167	0.00438768	0.930032	6.5e-08	-0.685661	0.00237894	-0.338912	0.18328	0.307884	0.229278	-0.734855	0.00077858
ENSRNOG00000017679	Cckbr	25706	black	-0.266899	0.300403	0.399072	0.112548	0.180303	0.488629	-0.279223	0.277769	0.355787	0.161042	0.18886	0.467869	-0.844061	2.05e-05	-0.195657	0.451699	-0.0700351	0.789396	-0.409445	0.102663	-0.0883858	0.73587	-0.647289	0.00497086	0.897791	1.01e-06	-0.710027	0.00140631	-0.349679	0.168869	0.346456	0.173101	-0.696257	0.00190433
ENSRNOG00000022321	Hapln3	308773	black	0.266335	0.301465	-0.368324	0.145755	-0.0435555	0.86817	0.195439	0.452213	-0.0562495	0.830215	-0.300662	0.240949	0.268713	0.297004	-0.251569	0.330043	0.298029	0.245296	0.438479	0.0783037	-0.277345	0.281148	0.51458	0.0345593	-0.55649	0.0203385	0.17083	0.512117	0.0356071	0.892081	-0.181741	0.48511	0.236798	0.360146
ENSRNOG00000010566	Cep44	290722	black	0.26421	0.305482	-0.6757	0.00290925	-0.365643	0.148938	0.150916	0.563147	-0.40402	0.107753	-0.0767503	0.769692	0.764872	0.000347949	0.231563	0.371172	0.134647	0.606391	0.57733	0.0152355	0.0852091	0.745062	0.562503	0.0187464	-0.831217	3.56e-05	0.775741	0.000252499	0.560057	0.0193819	-0.610445	0.00925212	0.449301	0.0704031
ENSRNOG00000025587	Plagl1	25157	black	-0.263367	0.307086	0.462739	0.0614275	0.263605	0.306634	-0.246502	0.340202	0.491206	0.0452476	0.187409	0.471358	-0.818016	6.01e-05	-0.146067	0.575894	-0.0095181	0.971079	-0.376628	0.136196	-0.0754614	0.773464	-0.592196	0.0122569	0.920391	1.66e-07	-0.657088	0.00415738	-0.4238	0.0900255	0.272098	0.290724	-0.633798	0.00629642
ENSRNOG00000017258	Ica1l	316432	black	-0.256764	0.319816	0.382291	0.129931	0.184919	0.477375	-0.264677	0.304596	0.383214	0.128929	0.136889	0.600353	-0.783004	0.000201816	-0.126848	0.627577	-0.0529319	0.840104	-0.27654	0.282606	-0.132741	0.611541	-0.62935	0.00679097	0.895415	1.19e-06	-0.642193	0.00544209	-0.372446	0.140955	0.154392	0.554085	-0.537995	0.0259037
ENSRNOG00000023360	Fus	317385	black	-0.255657	0.321978	0.278192	0.279621	0.131335	0.615352	-0.152395	0.559281	0.227409	0.380055	-0.0199765	0.939341	-0.514216	0.0347097	-0.118768	0.649825	-0.0741053	0.777438	-0.216973	0.402877	-0.321568	0.208165	-0.367494	0.146735	0.576535	0.0154094	-0.581556	0.0143363	-0.440288	0.0769401	0.346678	0.172806	-0.194635	0.454112
ENSRNOG00000006966	Nfia	25492	black	0.253655	0.325914	-0.170462	0.51304	-0.0253481	0.92307	0.346975	0.172415	-0.390318	0.121398	-0.390788	0.120911	0.791999	0.000151114	0.00627619	0.980927	-0.0328976	0.900253	0.344019	0.176346	0.0829588	0.751592	0.563875	0.0183972	-0.843871	2.06e-05	0.565833	0.0179077	0.224739	0.385824	-0.104034	0.691107	0.808772	8.48e-05
ENSRNOG00000047503	Apoc3	24207	black	0.249888	0.333394	-0.423302	0.0904447	-0.0351126	0.893572	0.249956	0.333258	0.0396446	0.879923	-0.0910151	0.728288	0.379745	0.132722	-0.0943422	0.718728	0.440988	0.0764169	0.487338	0.0472331	0.0533339	0.838904	0.616717	0.00836754	-0.621145	0.00778475	0.568758	0.0171954	0.418357	0.0946784	-0.469022	0.0575355	0.0479152	0.8551
ENSRNOG00000061153	Hrh3	85268	black	-0.246708	0.339784	0.624477	0.00736803	0.373897	0.139291	-0.1631	0.531665	0.476713	0.0530236	0.105092	0.688116	-0.748689	0.000544477	-0.180479	0.488198	-0.0617245	0.813948	-0.433166	0.0824098	-0.0237945	0.927773	-0.563966	0.0183742	0.862743	8.32e-06	-0.657791	0.00410344	-0.482102	0.0500237	0.368263	0.145828	-0.443549	0.0745259
ENSRNOG00000019900	Slc35b2	501103	black	0.245796	0.34163	-0.461697	0.0620918	-0.0849415	0.745838	0.326035	0.201557	-0.200441	0.440489	-0.405471	0.106374	0.652394	0.00453242	-0.095104	0.716545	0.272123	0.290677	0.655484	0.00428255	-0.130733	0.616987	0.703752	0.00161795	-0.831385	3.54e-05	0.598536	0.0111364	0.303416	0.236455	-0.384764	0.127259	0.556733	0.0202722
ENSRNOG00000053725	Usf2	81817	black	-0.244322	0.344626	0.563427	0.0185108	0.13297	0.610922	-0.257498	0.318386	0.0359076	0.891175	0.117533	0.65325	-0.483889	0.049058	0.017822	0.945873	-0.42613	0.0880854	-0.606994	0.00976977	-0.043925	0.867061	-0.683149	0.00250456	0.708082	0.0014693	-0.586888	0.0132621	-0.37743	0.135297	0.524279	0.0307408	-0.140478	0.590738
ENSRNOG00000051699	Zdhhc4	304291	black	0.243435	0.346435	-0.602457	0.0104851	-0.285082	0.267384	0.204441	0.431227	-0.368282	0.145805	-0.207261	0.42476	0.684562	0.00243322	0.0663727	0.800195	0.170876	0.512002	0.530851	0.0283436	-0.113944	0.663243	0.630942	0.00661046	-0.856347	1.15e-05	0.59964	0.0109497	0.404849	0.106963	-0.390365	0.12135	0.470703	0.0565258
ENSRNOG00000053510	Hcfc2	314704	black	-0.243026	0.347272	0.317423	0.214422	0.0391497	0.881412	-0.377407	0.135322	0.203648	0.433055	0.0892785	0.733294	-0.719456	0.00113152	-0.0552506	0.83319	-0.224995	0.385271	-0.36662	0.147773	-0.285196	0.267185	-0.68965	0.00219008	0.892079	1.5e-06	-0.690858	0.00213536	-0.299563	0.242758	0.288378	0.261649	-0.453642	0.0674047
ENSRNOG00000013948	Zc3hav1	252832	black	-0.239831	0.353842	-0.0853121	0.744763	0.0256848	0.922051	0.485174	0.0483718	-0.30905	0.227426	-0.301823	0.239048	0.644796	0.00519712	0.0569842	0.828028	0.0425661	0.871141	0.450103	0.0698424	0.415308	0.0973581	0.54074	0.0250107	-0.78283	0.000202923	0.665617	0.00354043	0.494292	0.0437098	-0.298136	0.245119	0.636601	0.00599998
ENSRNOG00000006871	Slc25a14	85263	black	-0.237832	0.35799	0.36863	0.145395	0.0118395	0.964029	-0.342517	0.178367	0.0826475	0.752497	0.383957	0.128127	-0.558388	0.0198249	0.103314	0.693147	-0.307988	0.229112	-0.560679	0.0192186	0.175349	0.500846	-0.728094	0.000920224	0.755526	0.000452477	-0.419116	0.0940191	-0.0792804	0.762302	0.256185	0.320946	-0.481481	0.0503628
ENSRNOG00000008146	Tox2	311615	black	-0.234174	0.365651	0.579538	0.0147603	0.264217	0.305469	-0.183756	0.4802	0.296548	0.247763	0.123145	0.637738	-0.507039	0.0377711	0.0297323	0.909812	-0.226485	0.382047	-0.434916	0.0810405	0.0159691	0.951494	-0.568304	0.0173046	0.750897	0.00051321	-0.526872	0.0297769	-0.462152	0.0618009	0.326673	0.200624	-0.122127	0.640541
ENSRNOG00000023601	Elavl4	432358	black	-0.230227	0.374017	0.161129	0.536703	-0.0630349	0.810066	-0.39219	0.119465	0.230865	0.372658	0.17473	0.502384	-0.634208	0.00625235	0.104777	0.689006	-0.16932	0.515909	-0.248979	0.335213	-0.218239	0.400071	-0.631676	0.0065286	0.860857	9.16e-06	-0.523429	0.0310618	-0.201369	0.438332	0.0491003	0.851553	-0.485873	0.048002
ENSRNOG00000023226	S100a10	81778	black	0.228956	0.376734	-0.33389	0.190271	-0.0887552	0.734804	0.264783	0.304397	-0.226106	0.382864	0.0779179	0.766279	0.694334	0.00198412	0.130431	0.617809	0.171009	0.511668	0.302145	0.238523	0.457499	0.0648205	0.557854	0.0199684	-0.817545	6.12e-05	0.758809	0.000413133	0.487739	0.0470243	-0.352184	0.165629	0.416516	0.0962896
ENSRNOG00000011789	Cdon	50938	black	0.226881	0.381192	-0.260784	0.312029	0.00249059	0.992431	0.295213	0.25	-0.188662	0.468345	-0.188314	0.46918	0.522087	0.0315739	-0.13918	0.594207	0.195026	0.453187	0.312345	0.222251	0.091457	0.727016	0.584397	0.0137557	-0.763011	0.000366966	0.399268	0.112356	0.201056	0.439058	-0.0605106	0.817549	0.459256	0.0636677
ENSRNOG00000007951	Galnt14	313878	black	-0.225905	0.3833	0.338734	0.183524	0.163079	0.531717	-0.286462	0.264974	0.485252	0.0483307	0.301713	0.239228	-0.832006	3.45e-05	-0.08338	0.750369	0.0332968	0.899048	-0.396334	0.115266	-0.10698	0.682784	-0.56896	0.017147	0.898709	9.49e-07	-0.645468	0.00513529	-0.380365	0.132039	0.210246	0.417968	-0.719092	0.00114125
ENSRNOG00000009265	Kcnk9	84429	black	-0.225107	0.385026	0.451814	0.068656	0.01787	0.945728	-0.365909	0.14862	0.13403	0.608054	0.234583	0.364789	-0.504714	0.0388053	0.249545	0.334079	-0.398685	0.11293	-0.557147	0.0201596	-0.0464871	0.859378	-0.72058	0.00110194	0.859725	9.7e-06	-0.507511	0.0375637	-0.263817	0.30623	0.253583	0.326057	-0.260967	0.311677
ENSRNOG00000004294	Ascl1	64186	black	-0.223285	0.388987	0.225582	0.383998	-0.0349585	0.894036	-0.377349	0.135387	0.257798	0.317801	0.232945	0.368244	-0.720038	0.00111613	0.0351846	0.893355	-0.173766	0.504781	-0.449991	0.0699207	-0.275897	0.283771	-0.629381	0.00678743	0.875436	4.17e-06	-0.687722	0.00227976	-0.390723	0.120978	0.335917	0.187428	-0.582549	0.0141311
ENSRNOG00000002141	Cd200	24560	black	-0.222389	0.390942	0.420001	0.0932548	-0.039054	0.8817	-0.378231	0.134401	-0.0166691	0.949371	0.170734	0.512358	-0.361294	0.1542	0.299331	0.24314	-0.530486	0.0284726	-0.540624	0.0250479	-0.0494533	0.850497	-0.737177	0.000734322	0.794952	0.000137005	-0.49913	0.0413779	-0.30608	0.232159	0.366059	0.14844	-0.0324146	0.901711
ENSRNOG00000008749	Col5a1	85490	black	-0.220778	0.394471	0.433799	0.0819125	0.286141	0.265532	-0.186857	0.47269	0.402356	0.109349	-0.00971571	0.970479	-0.766819	0.000328933	-0.321942	0.207606	0.00312631	0.990499	-0.247857	0.337468	-0.152986	0.557742	-0.540261	0.0251647	0.793472	0.000143932	-0.577631	0.0151699	-0.319342	0.21151	0.246248	0.340714	-0.578984	0.0148783
ENSRNOG00000019930	Rhot2	287156	black	-0.219337	0.397643	0.519286	0.0326637	0.139256	0.594004	-0.288234	0.261897	0.183879	0.4799	0.2617	0.310271	-0.571419	0.0165669	0.0227114	0.931054	-0.316334	0.216085	-0.634529	0.00621797	0.0878916	0.737298	-0.677648	0.00279859	0.775661	0.000253119	-0.533736	0.0273378	-0.279383	0.277483	0.47404	0.0545605	-0.342692	0.17813
ENSRNOG00000014795	Nr2f1	81808	black	-0.217465	0.401785	0.0798262	0.76071	0.186125	0.474456	-0.112035	0.66858	0.48384	0.049084	0.0684548	0.794051	-0.700531	0.00173633	-0.320949	0.209092	0.320831	0.209269	0.0966899	0.712006	-0.0933247	0.721648	-0.265525	0.302993	0.573015	0.0161989	-0.301539	0.239513	-0.0464479	0.859495	-0.157277	0.54661	-0.806361	9.24e-05
ENSRNOG00000003453	Lypd1	360838	black	-0.216315	0.404339	0.418841	0.0942573	0.0714198	0.785323	-0.340746	0.180769	0.233477	0.367119	0.190835	0.463142	-0.563191	0.0185707	0.132354	0.61259	-0.305206	0.233562	-0.512774	0.0353089	-0.111801	0.669235	-0.648283	0.00488293	0.861887	8.69e-06	-0.622017	0.00767395	-0.432121	0.0832354	0.400692	0.110962	-0.297589	0.246028
ENSRNOG00000003198	RGD1305733	360459	black	-0.213474	0.410689	0.0998552	0.702974	-0.0716225	0.784727	-0.353436	0.164026	0.275027	0.285354	0.300577	0.241089	-0.598452	0.0111506	0.178464	0.493146	-0.0663958	0.800126	-0.196265	0.450265	-0.108366	0.678877	-0.564152	0.0183274	0.801051	0.000111343	-0.403207	0.10853	-0.153852	0.555488	-0.138361	0.5964	-0.576813	0.0153485
ENSRNOG00000021480	Rad9b	363924	black	0.211132	0.415965	-0.163461	0.530744	0.00825064	0.974929	0.357247	0.159208	-0.280599	0.275309	-0.299906	0.242193	0.706411	0.0015253	0.0339446	0.897094	0.0716558	0.784629	0.441455	0.0760694	0.231454	0.371404	0.52037	0.0322386	-0.770702	0.000293585	0.686595	0.00233356	0.410951	0.101282	-0.414497	0.0980796	0.700953	0.00172044
ENSRNOG00000006375	Vdac1	83529	black	-0.21029	0.417868	0.0226924	0.931111	-0.171069	0.511517	-0.34253	0.178349	0.158767	0.542768	0.23283	0.368488	-0.527059	0.0297086	0.167018	0.521714	-0.133433	0.609668	-0.310923	0.224476	-0.284408	0.268566	-0.425917	0.0882613	0.647036	0.00499347	-0.550177	0.0221214	-0.245029	0.343187	0.181603	0.485447	-0.469642	0.0571611
ENSRNOG00000001837	Sst	24797	black	-0.210217	0.418034	0.356702	0.159892	0.0747326	0.775599	-0.26411	0.305674	0.120254	0.64571	0.101441	0.698463	-0.488872	0.0464382	-0.0351443	0.893476	-0.301978	0.238795	-0.490432	0.0456402	-0.0706097	0.787705	-0.55032	0.0220797	0.686116	0.00235672	-0.618124	0.00817865	-0.437655	0.0789301	0.636025	0.00605992	-0.308355	0.228528
ENSRNOG00000013454	Rala	81757	black	0.206421	0.426682	-0.435347	0.0807058	0.0959037	0.714255	0.420437	0.0928799	0.142078	0.586472	-0.356971	0.159554	0.377465	0.135257	-0.288512	0.261416	0.612721	0.00892299	0.80103	0.000111421	-0.125222	0.632032	0.786427	0.000181061	-0.731778	0.000840611	0.533298	0.0274887	0.218501	0.399491	-0.590665	0.0125403	0.224146	0.387112
ENSRNOG00000023720	Ntm	50864	black	0.205058	0.429807	-0.0590531	0.821877	-0.309092	0.22736	-0.507405	0.0376098	-0.208502	0.421929	0.331524	0.193626	-0.0695872	0.790715	0.400262	0.111382	-0.430604	0.0844448	-0.277325	0.281185	0.0873222	0.738944	-0.62254	0.00760805	0.500402	0.040781	-0.0825676	0.752729	0.126499	0.628532	-0.127298	0.626347	-0.0528939	0.840217
ENSRNOG00000002454	Rnf2	304850	black	-0.202881	0.434827	0.0270697	0.917861	0.179151	0.491456	0.532029	0.0279295	-0.0286099	0.913204	-0.050273	0.848046	0.473279	0.0550041	0.0252057	0.923501	0.24307	0.347181	0.290787	0.257506	0.551504	0.0217371	0.591848	0.0123208	-0.712646	0.00132499	0.562544	0.0187359	0.291345	0.256551	-0.251997	0.329194	0.413092	0.0993395
ENSRNOG00000003553	Efemp1	305604	black	0.20007	0.441353	-0.182402	0.483496	0.0377051	0.88576	0.348168	0.170844	-0.249033	0.335105	-0.387094	0.124777	0.687246	0.00230237	-0.0810699	0.757087	0.0724471	0.782304	0.411646	0.100648	0.115418	0.659133	0.564669	0.0181973	-0.759373	0.000406665	0.549108	0.0224352	0.201018	0.439148	-0.0906319	0.729392	0.660789	0.00387977
ENSRNOG00000004302	Pah	24616	black	-0.196811	0.448982	0.441738	0.0758599	0.174354	0.503319	-0.323378	0.205471	0.255634	0.322024	0.0615283	0.81453	-0.746021	0.000584366	-0.193135	0.457665	-0.210351	0.417731	-0.428484	0.0861563	-0.159855	0.53997	-0.698414	0.00181794	0.901877	7.55e-07	-0.723061	0.00103893	-0.379915	0.132535	0.459928	0.0632309	-0.498401	0.0417231
ENSRNOG00000059765	Asic1	79123	black	-0.194787	0.453752	0.442435	0.0753445	0.0175702	0.946637	-0.398245	0.113364	0.0513797	0.844739	0.215502	0.406151	-0.504072	0.0390951	0.170714	0.512407	-0.456397	0.0655515	-0.57861	0.0149585	-0.10634	0.684589	-0.775512	0.000254259	0.849452	1.6e-05	-0.636286	0.00603268	-0.423082	0.09063	0.428363	0.0862544	-0.157415	0.546253
ENSRNOG00000001216	Trpm2	294329	black	-0.193886	0.455884	0.169581	0.515251	-0.165399	0.525817	-0.474432	0.054333	0.112183	0.668164	0.330934	0.194468	-0.593098	0.0120922	0.208779	0.421297	-0.311127	0.224156	-0.526511	0.0299096	-0.20153	0.437957	-0.684522	0.00243522	0.828978	3.9e-05	-0.572338	0.0163542	-0.213402	0.410852	0.270432	0.293805	-0.491034	0.0453346
ENSRNOG00000018279	Sfxn1	364678	black	-0.192252	0.459765	0.369352	0.144548	0.100632	0.700762	-0.277779	0.280366	0.271629	0.291589	0.520534	0.0321749	-0.514024	0.0347887	0.173253	0.506059	-0.143175	0.583556	-0.532196	0.0278712	0.376219	0.136656	-0.581957	0.0142532	0.718956	0.00114487	-0.308698	0.227985	-0.0962195	0.713351	0.168868	0.517046	-0.578838	0.0149095
ENSRNOG00000019618	Hdac3	84578	black	-0.191477	0.461609	0.457081	0.0650969	0.019957	0.9394	-0.413821	0.0986845	0.0908705	0.728705	0.448085	0.0712606	-0.581962	0.0142521	0.184404	0.478624	-0.384656	0.127375	-0.694454	0.0019791	0.189146	0.467183	-0.804017	0.000100402	0.848068	1.7e-05	-0.501553	0.0402464	-0.112745	0.666592	0.303937	0.235611	-0.461908	0.0619567
ENSRNOG00000000158	Cdo1	81718	black	0.188726	0.468191	-0.485124	0.0483984	0.00356988	0.989151	0.429556	0.0852875	-0.00160015	0.995137	-0.184966	0.477262	0.489717	0.0460043	-0.183948	0.479733	0.54077	0.0250011	0.670802	0.00320326	0.0799439	0.760367	0.810355	8e-05	-0.873629	4.63e-06	0.611529	0.00909423	0.302366	0.238162	-0.512796	0.0352997	0.204903	0.430165
ENSRNOG00000061530	Fgf16	60464	black	0.187609	0.470876	-0.288374	0.261656	-0.00956463	0.970937	0.409843	0.102296	-0.252147	0.328897	-0.257692	0.318008	0.649014	0.00481904	-0.104207	0.690618	0.213536	0.410551	0.386806	0.125081	0.138422	0.596237	0.710744	0.00138367	-0.902745	7.08e-07	0.540644	0.0250417	0.278096	0.279795	-0.121624	0.641928	0.459874	0.063266
ENSRNOG00000007866	Clec2dl1	689790	black	-0.186785	0.472863	0.46998	0.0569581	0.28256	0.271824	-0.25503	0.323209	0.443533	0.0745375	0.0688765	0.792808	-0.83277	3.34e-05	-0.287378	0.263381	-0.039835	0.87935	-0.409648	0.102476	-0.204819	0.430358	-0.578342	0.0150162	0.89196	1.51e-06	-0.784836	0.000190473	-0.518203	0.0330928	0.482302	0.0499149	-0.599138	0.0110344
ENSRNOG00000059837	Cdkn2a	25163	black	0.186315	0.473997	-0.420709	0.0926473	-0.0521274	0.842505	0.290156	0.258587	-0.0619208	0.813366	-0.114967	0.660389	0.548544	0.0226018	0.0540199	0.836858	0.377828	0.134851	0.634407	0.00623106	0.116365	0.656495	0.615077	0.00859198	-0.705639	0.00155171	0.716268	0.00121896	0.431736	0.0835414	-0.720213	0.00111152	0.305596	0.232936
ENSRNOG00000019750	Kcna1	24520	black	0.186158	0.474377	-0.408197	0.103818	-0.0529143	0.840156	0.339436	0.18256	-0.0198276	0.939792	-0.0674908	0.796894	0.563711	0.0184387	0.0348644	0.89432	0.375652	0.137296	0.469366	0.0573273	0.18171	0.485185	0.687192	0.00230492	-0.753225	0.000481876	0.716522	0.00121181	0.353619	0.163792	-0.447013	0.0720229	0.211662	0.414767
ENSRNOG00000001470	Limk1	65172	black	0.185235	0.476611	0.0973856	0.710018	-0.145555	0.577248	-0.484224	0.0488786	-0.0571194	0.827626	0.23838	0.35685	-0.309681	0.22643	0.122884	0.638455	-0.348483	0.170431	-0.490483	0.0456142	-0.265501	0.303038	-0.547776	0.0228307	0.5586	0.0197684	-0.545233	0.0236008	-0.306483	0.231513	0.407004	0.104931	-0.114074	0.662878
ENSRNOG00000026060	Arsi	307404	black	-0.182423	0.483444	-0.105457	0.687082	0.151976	0.560376	0.588431	0.0129634	-0.115513	0.658867	-0.326457	0.20094	0.601929	0.010571	-0.0645061	0.805711	0.273549	0.288057	0.58927	0.0128033	0.359412	0.156515	0.710317	0.00139712	-0.851342	1.46e-05	0.643394	0.00532787	0.317457	0.21437	-0.379905	0.132546	0.594839	0.0117794
ENSRNOG00000031364	Kif1c	113886	black	0.182069	0.484309	-0.245252	0.342733	-0.179729	0.490037	0.159454	0.541002	-0.269815	0.294951	-0.0470817	0.857596	0.519988	0.032388	0.217866	0.400895	0.0140584	0.957293	0.170884	0.511982	0.0500225	0.848795	0.403311	0.108431	-0.581704	0.0143056	0.445743	0.0729332	0.343459	0.177098	-0.315093	0.217992	0.43422	0.0815831
ENSRNOG00000013892	Cby1	246768	black	-0.180984	0.486959	-0.259435	0.31463	-0.0512867	0.845016	0.372822	0.140521	-0.10442	0.690016	-0.397617	0.113986	0.480969	0.0506437	0.00983144	0.970127	0.168193	0.518748	0.509697	0.036614	-0.0742211	0.777099	0.584758	0.0136833	-0.61439	0.00868744	0.488333	0.0467161	0.221353	0.393209	-0.232376	0.369448	0.444603	0.0737574
ENSRNOG00000009790	Kcnk3	29553	black	-0.180718	0.487613	0.143445	0.582839	-0.128433	0.623249	-0.444496	0.0738351	0.171601	0.510185	0.499361	0.0412692	-0.580007	0.0146609	0.249241	0.334689	-0.2098	0.418979	-0.481322	0.0504499	0.0132892	0.959628	-0.653658	0.00442883	0.789261	0.000165266	-0.499169	0.0413598	-0.202304	0.436162	0.131522	0.614845	-0.550431	0.0220476
ENSRNOG00000004900	Crhr1	58959	black	0.180478	0.488199	-0.0322003	0.902358	-0.32056	0.209676	-0.718105	0.00116793	0.00431054	0.9869	0.495693	0.0430242	-0.534442	0.0270958	0.283133	0.270811	-0.372755	0.140599	-0.586792	0.0132808	-0.274808	0.285754	-0.82247	5.06e-05	0.904213	6.35e-07	-0.587327	0.0131765	-0.243368	0.346572	0.248943	0.335286	-0.583716	0.0138932
ENSRNOG00000021158	Nudt22	293703	black	0.179748	0.489991	-0.533789	0.0273196	-0.0470514	0.857687	0.357155	0.159324	0.0361764	0.890365	-0.235689	0.362467	0.50541	0.0384934	-0.0786738	0.764072	0.506603	0.0379635	0.738929	0.000702333	-0.0697115	0.790349	0.772559	0.000277844	-0.763921	0.000357559	0.600358	0.0108299	0.216573	0.403766	-0.575378	0.0156654	0.258201	0.317019
ENSRNOG00000010402	Hspb2	161476	black	0.176722	0.497446	-0.378355	0.134263	0.0512521	0.845119	0.43334	0.0822734	0.00932859	0.971654	-0.195154	0.452885	0.497885	0.0419688	-0.19835	0.445372	0.4762	0.0533161	0.505602	0.0384081	0.114092	0.662829	0.817158	6.21e-05	-0.85442	1.26e-05	0.566398	0.0177683	0.284576	0.268271	-0.252223	0.328746	0.200537	0.440265
ENSRNOG00000002028	Tmem50b	360698	black	0.1754	0.500719	-0.418467	0.0945823	0.0107407	0.967365	0.45619	0.0656892	-0.0105645	0.967901	-0.308648	0.228063	0.593992	0.0119308	-0.0781677	0.76555	0.46418	0.0605183	0.710159	0.00140211	-0.00698544	0.978772	0.826239	4.36e-05	-0.870533	5.49e-06	0.679604	0.002691	0.295055	0.250266	-0.591033	0.0124718	0.4452	0.0733249
ENSRNOG00000050583	Olr1115	405185	black	-0.174083	0.503992	-0.232699	0.368764	0.0274465	0.916722	0.341985	0.179087	0.0701976	0.788918	-0.0614227	0.814843	0.150443	0.564384	-0.138116	0.597058	0.383261	0.128878	0.289632	0.259486	-0.0158639	0.951814	0.559336	0.0195722	-0.522861	0.031278	0.210823	0.416661	0.0583765	0.823888	-0.0997832	0.703179	-0.0399126	0.879117
ENSRNOG00000011214	Polr2f	83503	black	0.173768	0.504777	-0.531402	0.0281492	-0.258362	0.316706	0.0850513	0.745519	-0.146262	0.575381	0.0815229	0.755768	0.426634	0.0876702	0.132291	0.61276	0.189698	0.465861	0.255071	0.323129	-0.0697641	0.790194	0.482066	0.0500437	-0.559434	0.0195462	0.289242	0.260157	0.0193581	0.941216	-0.0935733	0.720934	0.171427	0.510621
ENSRNOG00000007256	Necab1	64169	black	-0.173704	0.504935	0.247964	0.337252	-0.109163	0.676636	-0.508172	0.0372745	0.106993	0.682747	0.272373	0.290217	-0.628243	0.00691873	0.182822	0.482472	-0.360412	0.155282	-0.506963	0.0378045	-0.231804	0.370662	-0.788082	0.000171688	0.94399	1.28e-08	-0.646602	0.00503238	-0.303487	0.236341	0.27997	0.276431	-0.474231	0.0544498
ENSRNOG00000008901	Coro2a	313235	black	0.17264	0.507589	0.035331	0.892914	-0.317954	0.213613	-0.709188	0.00143321	-0.0365268	0.88931	0.653701	0.00442532	-0.417298	0.0956031	0.439303	0.0776801	-0.43871	0.0781281	-0.68541	0.00239123	-0.00165521	0.99497	-0.83846	2.62e-05	0.850735	1.5e-05	-0.436668	0.079686	-0.127733	0.62516	0.185896	0.475009	-0.52292	0.0312552
ENSRNOG00000017477	Mmp23	94339	black	-0.171218	0.511144	-0.275275	0.284903	-0.00327796	0.990038	0.510105	0.0364389	-0.164334	0.528523	-0.25424	0.324761	0.598959	0.0110646	0.0147914	0.955068	0.273485	0.288175	0.572201	0.0163858	0.249942	0.333286	0.728537	0.000910317	-0.861471	8.88e-06	0.630862	0.00661949	0.370845	0.142806	-0.38579	0.126161	0.498585	0.0416358
ENSRNOG00000011424	Cldn23	290789	black	-0.169016	0.516673	0.0248651	0.924532	-0.0937772	0.720349	-0.347752	0.17139	0.256696	0.319947	0.0799343	0.760395	-0.642008	0.00545988	-0.00804314	0.975559	-0.0488982	0.852158	-0.208526	0.421873	-0.514795	0.0344712	-0.447296	0.0718212	0.75123	0.000508624	-0.643377	0.0053295	-0.401697	0.109986	0.213751	0.410069	-0.566271	0.0177996
ENSRNOG00000013628	Cela2a	24332	black	-0.165099	0.526578	0.0183365	0.944313	-0.110373	0.673237	-0.302939	0.237229	0.225489	0.384199	0.18891	0.46775	-0.604161	0.0102118	0.0451959	0.863249	-0.0257183	0.92195	-0.224494	0.386356	-0.305294	0.233421	-0.420945	0.0924448	0.672258	0.00311348	-0.523994	0.0308482	-0.241263	0.350888	0.0798098	0.760758	-0.63827	0.00582882
ENSRNOG00000017628	Tagln	25123	black	0.164269	0.528688	-0.128562	0.622899	-0.0705244	0.787956	0.136538	0.601297	-0.346841	0.172591	-0.227253	0.380391	0.642076	0.00545326	0.127156	0.626736	-0.144009	0.581343	0.248524	0.336126	0.164345	0.528494	0.250415	0.332341	-0.50589	0.0382797	0.574069	0.0159592	0.335432	0.188106	-0.165232	0.52624	0.606768	0.00980443
ENSRNOG00000046852	B3gat2	64544	black	0.163597	0.530398	-0.333745	0.190477	0.119582	0.64757	0.500807	0.0405921	0.0714363	0.785274	-0.139373	0.593692	0.486056	0.0479056	-0.189337	0.466726	0.560157	0.0193555	0.591462	0.0123922	0.243224	0.346867	0.819023	5.79e-05	-0.871644	5.17e-06	0.665195	0.00356907	0.329934	0.195903	-0.495033	0.0433464	0.214324	0.408785
ENSRNOG00000015550	Ptgds	25526	black	0.16315	0.531536	-0.18669	0.473091	-0.198139	0.445865	0.0725198	0.782091	-0.423095	0.0906186	0.0518177	0.84343	0.672593	0.00309306	0.263282	0.307248	-0.22579	0.383547	-0.0434876	0.868374	0.398375	0.113236	0.273637	0.287894	-0.575862	0.0155579	0.513395	0.0350497	0.410023	0.102131	0.112783	0.666487	0.502472	0.0398234
ENSRNOG00000014870	Slc13a5	266998	black	0.160788	0.537578	0.0508033	0.846461	-0.0633956	0.808998	-0.419061	0.0940669	0.286546	0.264827	0.259581	0.314348	-0.489355	0.0461897	0.100368	0.701516	-0.0609674	0.816194	-0.31578	0.216935	-0.317122	0.214881	-0.473404	0.0549311	0.71666	0.00120793	-0.454817	0.0666099	-0.373548	0.139689	0.0928885	0.722901	-0.506993	0.037791
ENSRNOG00000027954	Cdh15	361432	black	0.15829	0.543997	-0.083506	0.750003	-0.0608033	0.816681	-0.385318	0.126665	0.253561	0.3261	0.181521	0.485648	-0.528629	0.0291372	-0.0906511	0.729337	0.0865445	0.741194	-0.0748996	0.77511	-0.319398	0.211427	-0.426246	0.0879899	0.616556	0.00838931	-0.320189	0.210234	-0.11095	0.671618	-0.138892	0.59498	-0.644837	0.00519326
ENSRNOG00000042978	Ncald	553106	black	-0.155465	0.551299	0.335582	0.187897	-0.120281	0.645636	-0.44009	0.0770881	-0.131288	0.615481	0.370334	0.143401	-0.422224	0.0913553	0.256493	0.320344	-0.528558	0.0291631	-0.68336	0.00249377	0.0549491	0.834088	-0.777167	0.000241788	0.737967	0.000719748	-0.580542	0.0145481	-0.258647	0.316154	0.460582	0.0628082	-0.284949	0.267617
ENSRNOG00000016742	Prl7b1	266804	black	0.153353	0.556785	0.00686291	0.979145	0.359451	0.156467	0.475041	0.0539813	0.116778	0.655347	-0.380389	0.132012	0.350998	0.167158	-0.400747	0.110908	0.397691	0.113913	0.506415	0.0380464	0.190505	0.463929	0.588387	0.0129718	-0.612394	0.00896969	0.393056	0.118579	0.0475413	0.85622	-0.167415	0.52071	0.360222	0.155516
ENSRNOG00000045539	Dusp11	297412	black	-0.152829	0.558151	-0.0350261	0.893833	0.1337	0.608948	0.54336	0.0241809	-0.146898	0.573701	-0.299484	0.242889	0.521499	0.0318004	-0.0516564	0.843912	0.21281	0.412181	0.494418	0.0436478	0.405207	0.106624	0.584087	0.0138182	-0.744588	0.000606776	0.668263	0.00336499	0.514823	0.0344595	-0.45822	0.0643459	0.481187	0.0505241
ENSRNOG00000059720	Syp	24804	black	-0.151547	0.561496	0.374495	0.138609	0.123525	0.636691	-0.301006	0.240385	0.312852	0.221462	0.0895601	0.732481	-0.76781	0.000319593	-0.143023	0.583959	-0.118604	0.650279	-0.452599	0.0681164	-0.354327	0.16289	-0.586603	0.0133179	0.857712	1.07e-05	-0.746153	0.000582342	-0.446755	0.0722069	0.387225	0.124638	-0.576899	0.0153296
ENSRNOG00000014714	Trpv6	114246	black	-0.149653	0.566455	0.336566	0.186525	0.158778	0.54274	-0.309552	0.226634	0.348824	0.169984	0.206721	0.425993	-0.725454	0.00098101	-0.14572	0.576813	-0.0736809	0.778683	-0.346402	0.173172	-0.0153364	0.953414	-0.627159	0.00704578	0.839896	2.46e-05	-0.572234	0.0163781	-0.300733	0.240833	0.239614	0.354293	-0.599161	0.0110304
ENSRNOG00000002120	Spata18	289586	black	0.147584	0.571894	-0.219233	0.397873	-0.0242299	0.926455	0.390014	0.121714	-0.222684	0.390298	-0.0572073	0.827365	0.771081	0.000290319	0.180456	0.488252	0.140465	0.590773	0.336703	0.186334	0.411706	0.100593	0.635556	0.00610918	-0.862282	8.52e-06	0.760647	0.000392378	0.383272	0.128867	-0.355551	0.16134	0.614362	0.00869141
ENSRNOG00000018185	Sag	25539	black	0.145772	0.576674	-0.0599873	0.819102	-0.00196188	0.994038	0.208514	0.421901	-0.34097	0.180464	-0.319855	0.210737	0.633826	0.00629338	0.0438488	0.86729	-0.149713	0.566297	0.207017	0.425317	0.0686362	0.793517	0.325776	0.201936	-0.550357	0.0220691	0.374248	0.138891	0.0558772	0.831324	0.0835453	0.749889	0.700578	0.00173458
ENSRNOG00000057372	Mettl6	290564	black	0.140479	0.590735	-0.598019	0.0112245	-0.268008	0.298323	0.222644	0.390386	-0.228237	0.378276	-0.286626	0.264688	0.521549	0.0317811	0.0192955	0.941405	0.25363	0.325964	0.586719	0.0132951	-0.283834	0.269576	0.638141	0.00584196	-0.734889	0.000777932	0.490775	0.0454657	0.327481	0.199448	-0.427465	0.0869877	0.352004	0.165861
ENSRNOG00000049242	LOC108348036	366798	black	-0.13674	0.600753	0.482132	0.0500076	0.111745	0.66939	-0.359157	0.156831	0.119233	0.648536	0.271451	0.291917	-0.59114	0.0124518	-0.0254559	0.922744	-0.372307	0.141115	-0.703521	0.00162622	0.00847153	0.974258	-0.721554	0.00107686	0.806982	9.04e-05	-0.731391	0.000848698	-0.495448	0.0431436	0.706962	0.00150663	-0.3693	0.144609
ENSRNOG00000005342	Rassf5	54355	black	-0.135259	0.604739	0.318919	0.21215	-0.0841814	0.748042	-0.509263	0.0368009	0.0919054	0.725726	0.344633	0.175525	-0.576964	0.0153154	0.235458	0.362951	-0.420674	0.0926767	-0.588014	0.0130435	-0.0467006	0.858738	-0.834491	3.11e-05	0.948226	7.16e-09	-0.587431	0.0131562	-0.256189	0.320939	0.302033	0.238706	-0.415117	0.097528
ENSRNOG00000012019	B3galnt1	310508	black	-0.135069	0.605252	0.0723649	0.782546	-0.19481	0.453698	-0.436549	0.0797777	0.0993777	0.704334	0.54816	0.0227159	-0.450477	0.0695817	0.376357	0.136501	-0.221211	0.393521	-0.432277	0.0831123	0.0728495	0.781123	-0.610154	0.00929489	0.707685	0.00148245	-0.360789	0.154819	-0.0912174	0.727706	-0.02137	0.935117	-0.474843	0.0540955
ENSRNOG00000003905	Nsf	60355	black	-0.134861	0.605814	0.0987669	0.706075	-0.0509151	0.846127	-0.277735	0.280444	0.27696	0.281845	0.0515415	0.844255	-0.585553	0.0135248	0.0238246	0.927682	-0.0561968	0.830372	-0.239521	0.354485	-0.482552	0.0497792	-0.365806	0.148742	0.672758	0.00308311	-0.670115	0.00324638	-0.468974	0.057564	0.21983	0.396557	-0.394807	0.116801
ENSRNOG00000013059	Aste1	363130	black	0.132404	0.612455	-0.410758	0.101457	-0.0891413	0.733689	0.352172	0.165645	-0.21853	0.399427	-0.258171	0.317078	0.633609	0.00631682	0.00478443	0.98546	0.256342	0.32064	0.630138	0.00670112	0.0917091	0.726291	0.647625	0.004941	-0.834444	3.11e-05	0.650489	0.0046922	0.374122	0.139034	-0.549368	0.0223585	0.516662	0.0337107
ENSRNOG00000019206	Nupr1l1	100912108	black	0.129216	0.621115	-0.15674	0.547998	0.166013	0.524258	0.346566	0.172955	0.0337365	0.897722	-0.460346	0.0629608	0.24087	0.351697	-0.471667	0.0559525	0.306194	0.231976	0.330451	0.19516	-0.237925	0.357797	0.58781	0.0130829	-0.568107	0.0173519	0.107842	0.680354	-0.125631	0.630911	0.281449	0.273795	0.224017	0.387394
ENSRNOG00000019494	Psmb10	291983	black	0.129185	0.621199	-0.621433	0.00774796	-0.267893	0.298537	0.182899	0.482284	-0.0864322	0.741519	0.0896233	0.732299	0.522193	0.0315333	0.221305	0.393317	0.347759	0.171382	0.539066	0.0255524	0.212353	0.41321	0.590763	0.012522	-0.661997	0.00379247	0.746743	0.000573344	0.581226	0.0144049	-0.685263	0.00239848	0.0830255	0.751399
ENSRNOG00000017021	Galnt18	293181	black	-0.128832	0.62216	-0.296596	0.247683	0.123116	0.637818	0.564376	0.0182708	0.0641318	0.806819	-0.404794	0.107016	0.418605	0.0944624	-0.217459	0.401798	0.495043	0.0433414	0.746217	0.00058136	0.027424	0.91679	0.81379	7.05e-05	-0.786059	0.000183205	0.479216	0.0516143	0.160694	0.537817	-0.400619	0.111033	0.382349	0.129867
ENSRNOG00000014093	Tom1	361370	black	-0.128699	0.622523	0.107434	0.681502	-0.151928	0.5605	-0.369689	0.144154	0.0893755	0.733014	0.505671	0.038377	-0.318031	0.213497	0.389786	0.12195	-0.234659	0.36463	-0.415539	0.0971528	0.171121	0.511387	-0.564713	0.0181864	0.635717	0.00609217	-0.158281	0.544019	-0.0328333	0.900447	-0.0191414	0.941872	-0.440795	0.0765613
ENSRNOG00000000221	Abhd5	316122	black	0.126881	0.627487	-0.378634	0.133953	-0.0901428	0.730801	0.379488	0.133006	-0.303116	0.236942	-0.199313	0.443118	0.764182	0.000354897	0.0685135	0.793878	0.201077	0.43901	0.577455	0.0152083	0.340852	0.180625	0.660589	0.00389437	-0.917198	2.21e-07	0.863701	7.92e-06	0.638799	0.00577546	-0.558664	0.019751	0.504583	0.0388645
ENSRNOG00000004311	Gpr182	29307	black	0.126131	0.62954	-0.21489	0.407519	-0.0296959	0.909922	0.318259	0.213151	-0.332581	0.192123	-0.362803	0.15236	0.712035	0.00134362	-0.0253652	0.923018	0.012896	0.960821	0.40883	0.103232	0.158244	0.544115	0.517354	0.0334322	-0.760323	0.00039597	0.625944	0.00719027	0.36183	0.153544	-0.133435	0.609665	0.647224	0.00497661
ENSRNOG00000004100	Trib1	78969	black	-0.125355	0.631666	0.404981	0.106839	0.0461726	0.86032	-0.264364	0.305191	0.091739	0.726205	0.0276228	0.916189	-0.552831	0.0213576	-0.0420493	0.872694	-0.33103	0.194331	-0.582522	0.0141367	-0.309387	0.226894	-0.54324	0.0242186	0.697001	0.00187418	-0.7643	0.000353705	-0.490826	0.04544	0.63291	0.00639278	-0.26194	0.309812
ENSRNOG00000006766	Laptm4b	315047	black	0.123555	0.636611	-0.520396	0.0322284	-0.169807	0.514684	0.326618	0.200705	-0.174319	0.503406	-0.0687382	0.793216	0.668328	0.00336074	0.154325	0.554258	0.324549	0.20374	0.619922	0.00794241	0.280701	0.275126	0.685505	0.00238656	-0.831713	3.49e-05	0.847375	1.76e-05	0.619716	0.00796913	-0.698013	0.00183376	0.303419	0.236449
ENSRNOG00000019000	Limk2	29524	black	-0.123287	0.637347	0.477356	0.0526587	0.272749	0.289525	-0.274304	0.286674	0.354957	0.162091	0.241296	0.350821	-0.706754	0.00151364	-0.210419	0.417577	-0.0802905	0.759357	-0.461034	0.0625171	0.120801	0.644199	-0.624499	0.00736533	0.802877	0.000104496	-0.531645	0.028064	-0.240283	0.352909	0.350359	0.167985	-0.603055	0.0103886
ENSRNOG00000029292	LOC500877	500877	black	0.122437	0.639688	-0.0547159	0.834783	-0.0033359	0.989862	0.272765	0.289496	-0.353944	0.163378	0.0610069	0.816076	0.726995	0.000945127	0.193915	0.455816	-0.0796362	0.761264	0.110216	0.673679	0.628591	0.00687834	0.362821	0.152338	-0.714556	0.00126818	0.680445	0.00264578	0.410489	0.101704	-0.152797	0.558234	0.597682	0.0112823
ENSRNOG00000008305	Sc5d	114100	black	0.121624	0.641928	-0.236111	0.361584	0.00548619	0.983328	0.370749	0.142918	-0.158317	0.543929	-0.261117	0.31139	0.585568	0.0135218	0.00226121	0.993128	0.206059	0.427511	0.531312	0.0281808	0.272149	0.290629	0.549717	0.022256	-0.707077	0.00150278	0.71088	0.00137939	0.464369	0.0603996	-0.53431	0.027141	0.392937	0.118701
ENSRNOG00000001931	Fgf12	170630	black	0.121039	0.643543	0.153371	0.556739	-0.202219	0.43636	-0.630573	0.00665201	0.00200346	0.993911	0.343342	0.177256	-0.491405	0.0451474	0.25725	0.318869	-0.452769	0.0680002	-0.601072	0.0107115	-0.267715	0.298871	-0.821762	5.21e-05	0.911302	3.64e-07	-0.642734	0.00539041	-0.367631	0.146573	0.361416	0.15405	-0.374714	0.13836
ENSRNOG00000021410	Negr1	59318	black	-0.120906	0.643909	0.296617	0.247648	0.17112	0.51139	-0.29559	0.249367	0.387281	0.124579	-0.0394825	0.880411	-0.795192	0.000135911	-0.262082	0.309539	-0.0204149	0.938012	-0.231748	0.370781	-0.467246	0.0586162	-0.554394	0.0209175	0.880494	3.11e-06	-0.793352	0.000144505	-0.571883	0.0164593	0.326895	0.2003	-0.530945	0.0283102
ENSRNOG00000007302	Fbn1	83727	black	-0.11965	0.647382	-0.351758	0.166177	-0.0841615	0.7481	0.42937	0.0854384	-0.248365	0.336445	-0.306868	0.230897	0.647593	0.00494385	0.01215	0.963086	0.192289	0.459676	0.577292	0.0152438	0.199819	0.441937	0.676026	0.0028905	-0.850606	1.51e-05	0.685635	0.00238018	0.465793	0.059512	-0.341356	0.179939	0.498994	0.0414422
ENSRNOG00000005393	Sertad2	498423	black	0.118057	0.651797	0.00826587	0.974882	-0.0918645	0.725844	0.186979	0.472395	-0.503454	0.039375	0.0263071	0.920168	0.68635	0.00234537	0.234936	0.364047	-0.285403	0.266822	-0.0919912	0.72548	0.46773	0.05832	0.229442	0.375693	-0.633629	0.00631465	0.470891	0.0564134	0.310791	0.224682	0.0779948	0.766055	0.677886	0.00278535
ENSRNOG00000025059	Nxph4	59316	black	0.117735	0.652689	0.0478977	0.855152	-0.33219	0.192679	-0.686186	0.00235333	-0.148795	0.568708	0.588117	0.0130237	-0.289068	0.260457	0.450729	0.0694066	-0.541758	0.0246859	-0.678105	0.00277314	0.047411	0.85661	-0.840488	2.4e-05	0.762817	0.000369003	-0.347816	0.171307	-0.106101	0.685265	0.271711	0.291437	-0.361978	0.153364
ENSRNOG00000050535	LOC108348096	117043	black	-0.117227	0.654101	0.36751	0.146716	-0.0215354	0.934616	-0.440723	0.0766149	0.078278	0.765228	0.186531	0.473476	-0.523734	0.0309463	0.160033	0.539513	-0.430528	0.0845062	-0.559735	0.0194667	-0.183158	0.481653	-0.75067	0.000516363	0.886369	2.17e-06	-0.678312	0.00276166	-0.428458	0.0861773	0.459446	0.063544	-0.248132	0.336914
ENSRNOG00000016818	Fgfr3	84489	black	-0.115326	0.659389	0.374541	0.138556	0.133844	0.608557	-0.321322	0.208534	0.327067	0.200051	0.387441	0.124409	-0.616108	0.00845032	0.0380613	0.884688	-0.130637	0.617249	-0.533129	0.0275471	0.0673462	0.797321	-0.612941	0.00889161	0.816153	6.45e-05	-0.518647	0.0329163	-0.356949	0.159581	0.340826	0.18066	-0.54706	0.0230454
ENSRNOG00000011071	Nt5e	58813	black	-0.114506	0.661675	-0.226795	0.381378	-0.044722	0.86467	0.422277	0.0913105	-0.221625	0.392614	-0.364823	0.14992	0.578364	0.0150114	0.0261914	0.920518	0.12078	0.644257	0.456814	0.0652741	0.0200089	0.939243	0.642071	0.00545381	-0.759205	0.000408585	0.427982	0.0865653	0.196243	0.450317	-0.163938	0.529528	0.647492	0.00495277
ENSRNOG00000020656	Pfkfb4	54283	black	0.114077	0.662871	-0.24901	0.335152	0.0424346	0.871536	0.470811	0.0564611	-0.209694	0.41922	-0.375785	0.137146	0.714481	0.00127038	-0.0247324	0.924934	0.223526	0.388461	0.631072	0.00659594	0.1792	0.491337	0.681738	0.00257746	-0.855067	1.22e-05	0.696021	0.001914	0.321499	0.208269	-0.46046	0.0628866	0.654557	0.00435629
ENSRNOG00000011202	Chrna4	25590	black	-0.112486	0.667318	0.313383	0.220636	-0.186324	0.473976	-0.550876	0.0219183	-0.131892	0.613843	0.326575	0.200768	-0.356388	0.160286	0.394535	0.117076	-0.628534	0.00688499	-0.659811	0.00395163	-0.0375197	0.886319	-0.857818	1.07e-05	0.840448	2.4e-05	-0.505871	0.038288	-0.21226	0.413419	0.365162	0.149513	-0.155058	0.552354
ENSRNOG00000020519	Olfm2	313783	black	-0.112235	0.668019	0.192579	0.458986	-0.103861	0.691599	-0.525461	0.0302986	0.140165	0.591574	0.26783	0.298656	-0.727076	0.000943266	0.0326009	0.901149	-0.293361	0.253123	-0.527986	0.0293703	-0.314556	0.21882	-0.773168	0.000272834	0.945324	1.07e-08	-0.767849	0.000319225	-0.385398	0.12658	0.419921	0.0933236	-0.595861	0.0115988
ENSRNOG00000005478	Fkbp9	297123	black	-0.111962	0.668784	-0.210472	0.417456	0.0204494	0.937907	0.527064	0.0297066	-0.216261	0.40446	-0.271688	0.29148	0.697786	0.00184276	0.0372116	0.887247	0.213129	0.411465	0.53502	0.0268991	0.342991	0.177727	0.721389	0.00108106	-0.920215	1.69e-07	0.76082	0.000390475	0.488936	0.0464049	-0.419967	0.0932842	0.606627	0.0098262
ENSRNOG00000007104	Itpr1	25262	black	0.109645	0.675282	-0.27483	0.285713	0.0948997	0.71713	0.52294	0.0312478	-0.0903503	0.730203	-0.35911	0.156889	0.642577	0.00540532	-0.140224	0.591416	0.368669	0.145349	0.663705	0.00367185	0.215278	0.406651	0.780339	0.000219316	-0.911245	3.66e-07	0.723103	0.00103789	0.377837	0.134841	-0.478507	0.0520103	0.532326	0.0278257
ENSRNOG00000017725	Pnlip	25702	black	-0.109488	0.675724	-0.0847855	0.74629	0.0337608	0.897649	0.496129	0.0428127	-0.282578	0.271793	-0.435998	0.0802024	0.675126	0.00294251	0.0351739	0.893387	0.0518912	0.843211	0.448448	0.0710039	0.12685	0.627573	0.6367	0.00598969	-0.823232	4.91e-05	0.531151	0.0282376	0.268519	0.297366	-0.225562	0.384041	0.804501	9.87e-05
ENSRNOG00000006470	Camk1g	171358	black	0.108367	0.678874	0.00140351	0.995735	-0.209879	0.418801	-0.580643	0.0145269	0.146387	0.57505	0.385245	0.126744	-0.595793	0.0116106	0.177041	0.496656	-0.217998	0.400603	-0.470479	0.0566595	-0.375803	0.137125	-0.673656	0.00302915	0.863637	7.94e-06	-0.668779	0.00333156	-0.41349	0.098982	0.248552	0.33607	-0.572617	0.0162901
ENSRNOG00000056558	Gabra3	24947	black	-0.106767	0.683383	0.309747	0.226325	-0.101506	0.698279	-0.499934	0.0409998	0.00856765	0.973966	0.136765	0.600686	-0.50644	0.0380356	0.188065	0.469779	-0.494621	0.043548	-0.553915	0.0210517	-0.323644	0.205077	-0.78598	0.000183666	0.899053	9.26e-07	-0.695134	0.00195062	-0.432599	0.0828572	0.459326	0.0636226	-0.217949	0.400712
ENSRNOG00000023375	Rab34	360571	black	0.105406	0.687227	-0.525765	0.0301857	-0.150561	0.564074	0.296663	0.247571	-0.194791	0.453743	-0.110693	0.672339	0.636297	0.00603157	0.0660987	0.801004	0.323296	0.205592	0.676474	0.00286487	0.279259	0.277704	0.627292	0.00703006	-0.809888	8.14e-05	0.873695	4.61e-06	0.688671	0.00223526	-0.719443	0.00113186	0.269448	0.295634
ENSRNOG00000011518	Dusp26	306527	black	0.104648	0.68937	0.0984544	0.706967	-0.233058	0.368005	-0.638078	0.00584827	0.0445952	0.86505	0.531098	0.0282564	-0.462979	0.0612758	0.34167	0.179513	-0.394891	0.116716	-0.660091	0.00393097	-0.11722	0.654118	-0.781708	0.000210172	0.86537	7.25e-06	-0.520455	0.0322055	-0.287702	0.262818	0.317956	0.21361	-0.500332	0.0408137
ENSRNOG00000010357	Lhx9	289048	black	0.104554	0.689635	-0.345984	0.173726	-0.159137	0.541815	0.274904	0.285579	-0.162247	0.533841	0.0653086	0.803338	0.642748	0.00538905	0.313154	0.220991	0.173043	0.506582	0.311933	0.222894	0.25493	0.323405	0.591999	0.0122931	-0.722021	0.00106496	0.641955	0.0054649	0.332155	0.192728	-0.446224	0.072587	0.414212	0.0983343
ENSRNOG00000021478	Tpd52l1	689256	black	0.103917	0.691439	0.0589767	0.822104	-0.209335	0.420035	-0.574205	0.0159285	0.058896	0.822344	0.373595	0.139635	-0.398214	0.113395	0.29412	0.25184	-0.336814	0.18618	-0.492276	0.0447097	-0.195434	0.452224	-0.675817	0.00290252	0.788845	0.000167509	-0.438233	0.0784903	-0.232448	0.369296	0.217556	0.401582	-0.414572	0.0980131
ENSRNOG00000029408	Mageb16	317274	black	0.103885	0.691531	0.0526014	0.84109	0.230351	0.373753	0.287557	0.263071	-0.0283217	0.914075	-0.426842	0.0874987	0.275233	0.28498	-0.309325	0.226992	0.130402	0.617887	0.272637	0.289731	-0.147927	0.57099	0.363879	0.151056	-0.396382	0.115218	0.116329	0.656597	-0.184626	0.478085	0.146603	0.574478	0.377536	0.135177
ENSRNOG00000054058	Osbpl1a	259221	black	0.102917	0.694274	0.10193	0.697075	-0.145269	0.578003	-0.609507	0.00939072	0.13152	0.614852	0.398325	0.113286	-0.671017	0.00318992	0.0711146	0.78622	-0.26347	0.306891	-0.549587	0.0222942	-0.244182	0.344911	-0.783359	0.000199577	0.922016	1.43e-07	-0.688577	0.00223961	-0.338016	0.184515	0.329087	0.197122	-0.677283	0.00281906
ENSRNOG00000053022	Olr1616	405129	black	-0.102623	0.695106	0.338138	0.184346	0.0409852	0.875892	-0.328031	0.198649	0.0330616	0.899758	-0.0165211	0.94982	-0.394073	0.117544	0.0108416	0.967059	-0.383062	0.129093	-0.410341	0.101839	-0.289323	0.260019	-0.566844	0.0176589	0.660089	0.00393113	-0.669065	0.00331319	-0.510086	0.036447	0.550674	0.0219769	0.0199358	0.939464
ENSRNOG00000002773	Rgs4	29480	black	-0.102527	0.695379	0.262603	0.308543	-0.185906	0.474985	-0.599689	0.0109416	-0.0394158	0.880612	0.409383	0.10272	-0.532667	0.0277071	0.289198	0.260233	-0.529465	0.0288366	-0.685765	0.00237385	-0.0438217	0.867371	-0.896042	1.14e-06	0.930484	6.2e-08	-0.602359	0.010501	-0.200143	0.441182	0.396029	0.115571	-0.412524	0.0998521
ENSRNOG00000019308	Arrb2	25388	black	0.100838	0.700179	-0.579428	0.0147837	-0.172732	0.507358	0.197259	0.447929	0.0690643	0.792255	-0.0404266	0.877571	0.315452	0.217439	0.0571958	0.827399	0.463841	0.060731	0.581355	0.0143781	-0.136984	0.600098	0.601569	0.0106299	-0.520444	0.0322099	0.462156	0.0617985	0.249309	0.334553	-0.560479	0.019271	-0.0001295	0.999606
ENSRNOG00000053924	Olr508	404880	black	0.100519	0.701085	-0.225842	0.383436	-0.0706835	0.787488	0.155735	0.550598	-0.236374	0.361033	-0.0760338	0.771788	0.445291	0.0732589	0.007	0.978728	0.0569869	0.82802	0.214779	0.407767	0.201588	0.437823	0.387222	0.124642	-0.557783	0.0199875	0.356752	0.159829	0.330989	0.19439	-0.0607803	0.816749	0.322062	0.207428
ENSRNOG00000008593	Ryk	140585	black	-0.0997075	0.703395	-0.082931	0.751673	0.11537	0.659267	0.518682	0.0329025	-0.21656	0.403795	-0.30745	0.229968	0.592283	0.012241	-0.100441	0.701307	0.191259	0.462128	0.438767	0.0780855	0.283783	0.269665	0.655051	0.00431687	-0.864135	7.74e-06	0.587097	0.0132213	0.375249	0.137753	-0.249418	0.334335	0.585932	0.0134499
ENSRNOG00000012697	Spaca9	296610	black	0.0979974	0.708271	-0.347547	0.17166	-0.0308924	0.906307	0.427518	0.0869441	-0.0670525	0.798188	-0.1377	0.598175	0.679327	0.00270603	0.131237	0.615618	0.338553	0.183774	0.567596	0.0174756	0.276155	0.283302	0.740685	0.000671434	-0.836106	2.9e-05	0.826135	4.38e-05	0.459838	0.0632894	-0.615994	0.00846595	0.438059	0.0786224
ENSRNOG00000005660	Fam110c	500638	black	-0.0977423	0.708999	0.0383495	0.883821	-0.0673912	0.797188	-0.305891	0.232462	0.130995	0.616277	-0.0915734	0.726682	-0.468656	0.0577568	-0.0313001	0.905076	-0.120089	0.646166	-0.0300718	0.908786	-0.479118	0.051669	-0.444237	0.074024	0.631259	0.00657501	-0.498649	0.0416053	-0.340122	0.181621	0.0385066	0.883348	-0.29317	0.253448
ENSRNOG00000012008	S100a3	114216	black	-0.097606	0.709388	0.342264	0.178709	0.349807	0.168703	0.00305462	0.990717	0.470945	0.0563811	-0.0683278	0.794426	-0.496691	0.0425416	-0.305935	0.23239	0.175343	0.500862	-0.12262	0.639184	-0.244757	0.343741	-0.143262	0.583325	0.436734	0.0796353	-0.501431	0.0403027	-0.547362	0.0229546	0.308666	0.228036	-0.175241	0.501114
ENSRNOG00000002595	Dpp10	363972	black	0.0974721	0.709771	0.176034	0.499149	-0.253078	0.327054	-0.653524	0.00443968	-0.100512	0.701106	0.424918	0.0890912	-0.385925	0.126018	0.393333	0.118297	-0.569961	0.0169091	-0.67718	0.00282489	-0.142604	0.585073	-0.873453	4.67e-06	0.883242	2.63e-06	-0.56677	0.0176771	-0.312459	0.222073	0.363317	0.151737	-0.262588	0.308573
ENSRNOG00000048331	Olr1396	405987	black	-0.0961214	0.713632	0.452728	0.0680282	0.0329452	0.900109	-0.286429	0.265032	-0.028652	0.913077	0.264148	0.305601	-0.374142	0.139011	0.115913	0.657752	-0.44564	0.0730073	-0.671482	0.00316107	0.144759	0.579354	-0.636436	0.00601706	0.6012	0.0106905	-0.503297	0.0394464	-0.282723	0.271536	0.508725	0.037034	-0.156089	0.549682
ENSRNOG00000015591	Cndp2	291394	black	0.0957662	0.714648	-0.614769	0.00863474	-0.312921	0.221354	0.200716	0.439849	-0.281726	0.273303	0.00799578	0.975703	0.640609	0.0055957	0.230521	0.37339	0.224377	0.386611	0.522886	0.0312682	0.111762	0.669343	0.584074	0.0138207	-0.77591	0.00025121	0.74929	0.000535821	0.54141	0.0247964	-0.601755	0.0105994	0.265191	0.303624
ENSRNOG00000053317	Efcab11	500705	black	0.0957168	0.71479	-0.20196	0.436959	0.0340072	0.896905	0.375399	0.137583	0.0172901	0.947487	-0.0960483	0.713841	0.539174	0.0255173	0.134867	0.605795	0.270826	0.293073	0.382823	0.129352	0.206138	0.427329	0.627395	0.00701798	-0.640871	0.00557001	0.52732	0.029613	0.135086	0.605206	-0.350943	0.167229	0.444221	0.0740351
ENSRNOG00000004019	Phlda1	29380	black	-0.0942016	0.719131	0.479453	0.0514821	0.290946	0.257234	-0.252257	0.328679	0.42236	0.0912405	0.241471	0.35046	-0.701126	0.00171396	-0.151445	0.561762	-0.0298003	0.909606	-0.387891	0.123936	0.0861681	0.742284	-0.610365	0.00926386	0.832551	3.37e-05	-0.496927	0.0424278	-0.29845	0.244599	0.179691	0.490129	-0.568811	0.0171827
ENSRNOG00000007781	Stau1	84496	black	0.0937852	0.720326	-0.309342	0.226966	-0.0958685	0.714356	0.305634	0.232874	-0.227255	0.380387	-0.149206	0.567628	0.636534	0.00600689	0.186789	0.472854	0.170607	0.512675	0.525496	0.0302856	0.136037	0.602643	0.533671	0.02736	-0.708976	0.00144007	0.672174	0.0031186	0.408072	0.103935	-0.631879	0.00650614	0.558003	0.0199282
ENSRNOG00000026884	Snx17	298836	black	-0.0932776	0.721783	-0.382467	0.12974	-0.0287914	0.912655	0.355783	0.161047	0.128256	0.623732	-0.144489	0.58007	0.389754	0.121984	0.0919424	0.72562	0.44616	0.0726334	0.658615	0.00404095	0.0928873	0.722904	0.653529	0.00443933	-0.565375	0.0180212	0.608488	0.00954292	0.342892	0.177861	-0.66502	0.00358108	0.186796	0.472837
ENSRNOG00000039832	Gpr12	80840	black	-0.0897064	0.732059	-0.174707	0.502441	0.057635	0.826092	0.526637	0.0298634	-0.0883865	0.735868	-0.0985483	0.706699	0.647331	0.00496706	0.124515	0.633973	0.289992	0.258868	0.462546	0.0615501	0.444928	0.073522	0.722217	0.00106002	-0.856044	1.17e-05	0.763393	0.000362996	0.421476	0.0919912	-0.490908	0.0453984	0.490653	0.0455279
ENSRNOG00000058692	Slc26a4	29440	black	-0.0886293	0.735167	0.333773	0.190437	0.0867845	0.740499	-0.374998	0.138038	0.183377	0.48112	0.0271434	0.917638	-0.634889	0.00617962	-0.148665	0.56905	-0.235482	0.362902	-0.383577	0.128536	-0.228446	0.377827	-0.656389	0.00421156	0.819522	5.68e-05	-0.604378	0.0101773	-0.234905	0.364113	0.373731	0.139481	-0.42054	0.0927917
ENSRNOG00000009256	Gkn2	297419	black	0.0881819	0.736459	0.0409556	0.875981	-0.222244	0.391259	-0.54153	0.0247582	0.0350334	0.893811	0.384671	0.127359	-0.395547	0.116055	0.30577	0.232655	-0.300923	0.240521	-0.383509	0.128611	-0.108234	0.679249	-0.700315	0.00174453	0.756053	0.000445964	-0.288123	0.262089	-0.00903489	0.972546	-0.0693847	0.791311	-0.3823	0.129921
ENSRNOG00000004257	Ctps2	619580	black	0.084394	0.747426	0.0241467	0.926707	-0.282909	0.271208	-0.608751	0.00950345	-0.010361	0.968519	0.353738	0.16364	-0.464405	0.0603774	0.320139	0.210309	-0.381892	0.130366	-0.459213	0.0636956	-0.286573	0.264781	-0.751903	0.000499462	0.844906	1.97e-05	-0.548372	0.022653	-0.239883	0.353735	0.127949	0.62457	-0.384957	0.127052
ENSRNOG00000042152	Gipc2	365960	black	-0.0828607	0.751878	0.0685963	0.793634	-0.135094	0.605185	-0.508237	0.0372463	0.175582	0.500269	0.336624	0.186444	-0.717495	0.00118467	0.0107244	0.967415	-0.163499	0.530647	-0.432062	0.0832823	-0.196845	0.4489	-0.686057	0.00235959	0.864189	7.72e-06	-0.600641	0.0107828	-0.14212	0.586361	0.246377	0.340453	-0.768338	0.000314709
ENSRNOG00000018214	Bok	29884	black	0.0827839	0.752101	-0.437407	0.0791197	-0.0628007	0.810759	0.413608	0.0988759	-0.0446319	0.86494	-0.107858	0.680309	0.621216	0.00777564	0.0969822	0.71117	0.414463	0.0981102	0.611014	0.00916896	0.19316	0.457607	0.783192	0.000200625	-0.849745	1.58e-05	0.749379	0.000534552	0.404462	0.107332	-0.619345	0.00801758	0.345634	0.174191
ENSRNOG00000018564	Nup93	291874	black	0.0824349	0.753115	-0.534351	0.027127	-0.251693	0.329798	0.275004	0.285397	-0.36766	0.146539	-0.169834	0.514616	0.769567	0.000303571	0.184466	0.478475	0.141239	0.588708	0.604449	0.010166	0.173656	0.505056	0.614062	0.0087333	-0.87058	5.48e-06	0.812292	7.45e-05	0.581046	0.0144426	-0.57266	0.0162801	0.5209	0.0320322
ENSRNOG00000018639	Zfand2b	363253	black	0.0818895	0.754701	-0.544964	0.0236834	-0.0887263	0.734887	0.37508	0.137944	-0.0198916	0.939598	-0.124488	0.634047	0.492831	0.0444328	-0.0539208	0.837154	0.493348	0.0441761	0.664993	0.0035829	0.0781994	0.765457	0.775604	0.000253549	-0.822058	5.15e-05	0.625185	0.00728185	0.358523	0.157618	-0.541502	0.0247671	0.206092	0.427435
ENSRNOG00000013950	Aadac	57300	black	-0.0774184	0.767739	0.0198867	0.939613	0.237554	0.35857	0.352702	0.164965	0.00141783	0.995691	-0.411925	0.100395	0.270345	0.293965	-0.332006	0.19294	0.187702	0.470652	0.370846	0.142805	0.0849035	0.745948	0.412968	0.0994514	-0.447999	0.0713217	0.265046	0.303898	0.0583615	0.823932	0.0725273	0.782069	0.281826	0.273124
ENSRNOG00000015124	Gpam	29653	black	0.0755529	0.773196	0.0359481	0.891053	0.21026	0.417937	0.472649	0.0553735	-0.16601	0.524267	-0.525126	0.0304232	0.528556	0.0291638	-0.243151	0.347016	0.106103	0.685257	0.405409	0.106433	0.134304	0.607315	0.548385	0.0226491	-0.683858	0.00246856	0.398515	0.113097	0.132622	0.611863	-0.0249569	0.924255	0.616881	0.00834534
ENSRNOG00000042492	Cop1	360860	black	0.0739102	0.77801	-0.0743046	0.776854	0.199277	0.443204	0.522546	0.031398	-0.0563177	0.830012	-0.359723	0.156132	0.573939	0.0159885	-0.136191	0.602229	0.307765	0.229467	0.592518	0.0121978	0.295952	0.24876	0.634152	0.00625832	-0.773692	0.00026859	0.74147	0.000657979	0.42131	0.0921333	-0.550636	0.021988	0.535591	0.0267058
ENSRNOG00000004535	Kcng3	171011	black	-0.0719637	0.783724	0.324727	0.203477	0.0941617	0.719246	-0.41091	0.101319	0.272674	0.289663	0.105395	0.687257	-0.761766	0.00038018	-0.179322	0.491037	-0.180547	0.48803	-0.466789	0.0588967	-0.316264	0.216193	-0.677994	0.0027793	0.91593	2.47e-07	-0.767984	0.000317972	-0.428975	0.0857576	0.494269	0.043721	-0.588818	0.0128894
ENSRNOG00000000060	Cplx1	64832	black	0.0717733	0.784284	-0.123589	0.636516	-0.446519	0.0723758	-0.683989	0.00246196	-0.102392	0.695763	0.539115	0.0255365	-0.366814	0.147542	0.477879	0.0523635	-0.436399	0.0798928	-0.5799	0.0146836	-0.201381	0.438303	-0.716079	0.00122432	0.759272	0.000407825	-0.464167	0.0605263	-0.127441	0.625958	0.211784	0.414491	-0.458196	0.0643614
ENSRNOG00000018666	Gpsm1	246254	black	-0.0698437	0.78996	0.422535	0.0910923	0.0973098	0.710234	-0.411267	0.100993	0.250972	0.331232	0.314423	0.219025	-0.593751	0.011974	0.106733	0.68348	-0.273002	0.28906	-0.557178	0.0201511	-0.0394802	0.880418	-0.728053	0.000921124	0.901949	7.51e-07	-0.581047	0.0144422	-0.38932	0.122437	0.31584	0.216843	-0.398806	0.11281
ENSRNOG00000011830	Plekha3	295674	black	0.0697798	0.790148	-0.5097	0.0366127	-0.035562	0.892217	0.367392	0.146856	0.029043	0.911895	-0.0679993	0.795394	0.462533	0.0615585	-0.0680124	0.795356	0.529645	0.0287723	0.687827	0.0022748	0.182866	0.482365	0.725356	0.000983311	-0.774802	0.000259773	0.692657	0.00205597	0.402554	0.109158	-0.630276	0.00668553	0.121352	0.642678
ENSRNOG00000012109	Otulinl	310190	black	-0.0687931	0.793054	-0.335022	0.188681	0.0796281	0.761288	0.546322	0.0232687	0.0419943	0.872859	-0.361792	0.153591	0.481785	0.0501967	-0.163412	0.530869	0.49073	0.0454886	0.713816	0.00128994	0.0788072	0.763683	0.857235	1.1e-05	-0.848834	1.64e-05	0.57391	0.0159951	0.29001	0.258836	-0.451336	0.0689861	0.360614	0.155033
ENSRNOG00000001953	Bace2	288227	black	-0.0679913	0.795418	0.339608	0.182324	0.26553	0.302983	-0.191589	0.461342	0.451783	0.068677	0.0217277	0.934034	-0.630403	0.00667117	-0.245302	0.342633	0.0461385	0.860423	-0.232472	0.369245	-0.156846	0.547724	-0.40009	0.111549	0.709038	0.00143808	-0.564066	0.0183489	-0.443942	0.0742385	0.321289	0.208582	-0.45993	0.06323
ENSRNOG00000019926	Ramp1	58965	black	0.0679203	0.795627	0.186056	0.474623	-0.00396235	0.987958	-0.446987	0.0720411	0.295059	0.250258	0.299662	0.242595	-0.606972	0.00977316	0.051285	0.845021	-0.133818	0.608628	-0.462552	0.0615465	-0.331036	0.194323	-0.599533	0.0109678	0.828675	3.95e-05	-0.63428	0.0062446	-0.5362	0.0265011	0.299857	0.242273	-0.492033	0.0448316
ENSRNOG00000007456	Calb1	83839	black	-0.0677148	0.796234	0.0316766	0.903939	-0.0745886	0.776021	-0.418066	0.0949315	0.276642	0.28242	0.165001	0.526826	-0.62842	0.00689812	0.0186459	0.943375	-0.0448726	0.864218	-0.197163	0.448155	-0.459145	0.0637404	-0.531024	0.0282825	0.792236	0.000149939	-0.559344	0.0195702	-0.362122	0.153188	0.0648038	0.804831	-0.540499	0.0250884
ENSRNOG00000024705	Rarres2	297073	black	-0.0651342	0.803854	-0.231213	0.371917	0.153776	0.555684	0.592967	0.0121159	0.0426983	0.870744	-0.394914	0.116693	0.576378	0.0154441	-0.129268	0.620974	0.444095	0.0741269	0.722469	0.00105368	0.191671	0.461147	0.822818	5e-05	-0.843101	2.14e-05	0.727152	0.000941544	0.316423	0.215949	-0.496209	0.0427743	0.462513	0.0615714
ENSRNOG00000038184	Camk2n2	59314	black	0.0645744	0.805509	0.176479	0.498047	-0.139105	0.594409	-0.599011	0.0110559	0.123159	0.637699	0.514745	0.0344915	-0.562261	0.0188084	0.245776	0.341671	-0.322015	0.207498	-0.633782	0.00629812	-0.0860119	0.742736	-0.781146	0.000213891	0.893277	1.38e-06	-0.568161	0.017339	-0.272305	0.290343	0.274967	0.285464	-0.550136	0.0221334
ENSRNOG00000062013	Adprhl1	290880	black	0.0629328	0.810368	0.106161	0.685093	-0.0334764	0.898507	-0.416089	0.0966668	0.177243	0.496158	0.372268	0.141159	-0.511769	0.035731	0.0548541	0.834371	-0.11461	0.661383	-0.32037	0.209961	-0.000488961	0.998514	-0.580244	0.0146109	0.681192	0.00260613	-0.452914	0.0679013	-0.2009	0.439421	0.0742357	0.777056	-0.445245	0.0732926
ENSRNOG00000003815	Slc25a11	64201	black	-0.062393	0.811967	0.189777	0.465672	-0.135521	0.604033	-0.481899	0.0501346	0.0877407	0.737734	0.673615	0.0030316	-0.406865	0.105062	0.361987	0.153352	-0.300227	0.241664	-0.667082	0.00344239	0.30201	0.238743	-0.678083	0.00277436	0.715481	0.0012414	-0.255523	0.322242	0.0253773	0.922982	0.192788	0.458489	-0.571359	0.016581
ENSRNOG00000024120	Rxfp1	295144	black	-0.060076	0.818839	0.15002	0.565492	-0.103424	0.692835	-0.434411	0.081434	0.0704981	0.788034	0.277741	0.280435	-0.594144	0.0119036	0.0181069	0.945009	-0.238901	0.35577	-0.440942	0.0764513	-0.0939162	0.71995	-0.680873	0.00262299	0.761004	0.000388455	-0.474899	0.0540633	-0.073004	0.780669	0.208662	0.421565	-0.644204	0.00525199
ENSRNOG00000020706	Kcnn3	54263	black	0.0599408	0.81924	0.315878	0.216784	-0.0458917	0.861162	-0.420979	0.0924163	0.02471	0.925002	0.393458	0.11817	-0.248217	0.336743	0.358671	0.157434	-0.411872	0.100443	-0.52915	0.0289495	0.180733	0.487575	-0.691471	0.00210802	0.697303	0.00186204	-0.235884	0.362057	-0.143388	0.58299	0.104267	0.690449	-0.183171	0.481621
ENSRNOG00000005874	Tle2	299636	black	-0.0595574	0.820379	0.309889	0.226102	0.148165	0.570363	-0.359555	0.156339	0.367766	0.146414	0.0965981	0.712268	-0.859835	9.65e-06	-0.288362	0.261677	-0.0494407	0.850535	-0.413136	0.0992999	-0.39133	0.120351	-0.615261	0.00856664	0.902158	7.4e-07	-0.855149	1.22e-05	-0.545043	0.0236591	0.467241	0.0586197	-0.673449	0.0030415
ENSRNOG00000009980	Plpp1	64369	black	0.0586642	0.823032	-0.23274	0.368677	-0.12676	0.627819	0.312188	0.222496	-0.247852	0.337478	0.0592821	0.821196	0.701386	0.00170423	0.32904	0.19719	0.0758619	0.772292	0.220201	0.39574	0.371253	0.142332	0.553976	0.0210344	-0.756859	0.000436145	0.699311	0.001783	0.408789	0.103269	-0.376104	0.136786	0.48148	0.0503635
ENSRNOG00000017097	Lhpp	361663	black	-0.0584664	0.82362	0.135033	0.605348	0.0525918	0.841119	-0.294453	0.251278	0.180162	0.488974	-0.102265	0.696123	-0.491458	0.0451208	-0.138467	0.596117	-0.103972	0.691283	-0.0346386	0.895001	-0.363282	0.151778	-0.487244	0.0472822	0.667622	0.00340683	-0.499613	0.0411506	-0.343351	0.177243	0.113218	0.665269	-0.262706	0.308347
ENSRNOG00000048250	Tmem159	378467	black	0.0574326	0.826694	-0.398906	0.112711	-0.335536	0.187961	0.10984	0.674734	-0.499205	0.0413426	-0.141746	0.587356	0.660923	0.00387003	0.243992	0.345298	-0.126073	0.6297	0.262564	0.308617	0.100458	0.701258	0.366243	0.148221	-0.653032	0.00447987	0.636594	0.00600069	0.646151	0.00507307	-0.264003	0.305875	0.419059	0.0940686
ENSRNOG00000002343	Uchl1	29545	black	-0.0568756	0.828351	-0.030453	0.907634	-0.284051	0.269194	-0.485105	0.0484084	0.00414475	0.987404	0.34379	0.176654	-0.482755	0.0496692	0.212127	0.413718	-0.279554	0.277176	-0.520251	0.0322853	-0.337412	0.18535	-0.52555	0.0302655	0.652667	0.00450986	-0.643093	0.00535634	-0.319571	0.211165	0.40864	0.103407	-0.495427	0.0431538
ENSRNOG00000020247	Cnih2	361705	black	-0.0563805	0.829825	-0.203846	0.432599	0.0222881	0.932336	0.35898	0.15705	0.144062	0.581202	-0.25276	0.327682	0.313563	0.220356	0.0585763	0.823294	0.324164	0.204309	0.426538	0.0877492	-0.140877	0.589673	0.615406	0.0085466	-0.469022	0.0575352	0.304656	0.234449	0.00709814	0.97843	-0.308497	0.228303	0.317005	0.215059
ENSRNOG00000054548	Srpk3	293854	black	0.0562542	0.830201	0.301609	0.239398	-0.039365	0.880764	-0.56116	0.0190933	0.071318	0.785622	0.321025	0.208978	-0.629077	0.00682224	0.0341926	0.896346	-0.374837	0.13822	-0.641726	0.00548698	-0.194933	0.453407	-0.835616	2.96e-05	0.908365	4.61e-07	-0.700767	0.00172744	-0.359531	0.156368	0.450295	0.0697085	-0.492743	0.0444765
ENSRNOG00000028746	Gsto1	114846	black	0.0562275	0.83028	-0.532145	0.0278889	-0.223645	0.388202	0.262536	0.308671	-0.270494	0.293689	0.0283429	0.914011	0.678855	0.00273179	0.195224	0.452719	0.235393	0.363087	0.546765	0.0231344	0.367182	0.147105	0.599935	0.0109004	-0.833491	3.24e-05	0.837232	2.76e-05	0.658135	0.0040773	-0.629302	0.00679639	0.313231	0.220872
ENSRNOG00000033263	Olr1069	362821	black	-0.0561404	0.83054	0.258964	0.31554	0.287421	0.263306	0.398961	0.112657	-0.119814	0.646927	-0.302123	0.238559	0.441384	0.076122	-0.0791054	0.762813	-0.00964093	0.970706	0.200124	0.441227	0.323561	0.205201	0.321038	0.208959	-0.462653	0.0614825	0.327258	0.199772	0.0163879	0.950224	-0.00496329	0.984917	0.586478	0.0133423
ENSRNOG00000018367	Taldo1	83688	black	0.0555245	0.832374	-0.394691	0.116919	-0.102449	0.695602	0.357655	0.158699	-0.168537	0.517881	-0.192361	0.459504	0.650683	0.00467572	0.0950124	0.716807	0.233322	0.367448	0.482261	0.0499372	0.0193073	0.94137	0.708439	0.00145759	-0.817495	6.14e-05	0.546537	0.0232033	0.157914	0.544966	-0.274718	0.285919	0.53215	0.0278871
ENSRNOG00000017854	Ucp2	54315	black	0.054047	0.836777	-0.23314	0.367831	-0.201786	0.437363	0.217247	0.402268	-0.406906	0.105023	-0.0348787	0.894277	0.673017	0.00306747	0.230785	0.372828	-0.112619	0.666945	0.0839541	0.748702	0.277517	0.280839	0.408351	0.103675	-0.692398	0.00206724	0.585233	0.0135885	0.386565	0.125337	-0.0410443	0.875714	0.451499	0.0688735
ENSRNOG00000014117	Hmox1	24451	black	0.0539932	0.836938	-0.438431	0.0783403	-0.0044325	0.98653	0.369307	0.144601	0.0760951	0.771609	-0.0451576	0.863363	0.42236	0.0912401	-0.0564842	0.829516	0.536056	0.0265493	0.605121	0.0100602	0.214303	0.408831	0.723969	0.00101662	-0.733599	0.000803443	0.714079	0.00128218	0.505302	0.0385418	-0.617169	0.00830646	0.0390354	0.881756
ENSRNOG00000047591	Vom1r70	NA	black	0.0534837	0.838457	0.132997	0.610848	0.357581	0.158791	0.470661	0.0565505	0.02909	0.911753	-0.505802	0.0383187	0.327568	0.199321	-0.39319	0.118442	0.24219	0.348984	0.365193	0.149476	-0.00436131	0.986746	0.548587	0.0225892	-0.570817	0.0167076	0.182121	0.484181	-0.129455	0.620463	0.0876393	0.738027	0.472645	0.055376
ENSRNOG00000005679	Fap	192203	black	-0.0528809	0.840256	0.158469	0.543535	-0.183313	0.481276	-0.595914	0.0115894	-0.027262	0.91728	0.404761	0.107047	-0.595223	0.0117112	0.114094	0.662822	-0.413158	0.0992803	-0.623666	0.00746776	-0.0467948	0.858456	-0.846273	1.85e-05	0.871489	5.21e-06	-0.582379	0.0141661	-0.0933303	0.721632	0.421935	0.0916007	-0.598532	0.011137
ENSRNOG00000060262	Prps1	29562	black	-0.0528749	0.840274	0.0259295	0.921311	-0.124437	0.634187	-0.46627	0.0592172	0.194347	0.454794	0.415892	0.0968402	-0.528666	0.029124	0.193681	0.45637	-0.110511	0.672851	-0.272479	0.290023	-0.0755648	0.773162	-0.613781	0.00877286	0.772804	0.000275822	-0.370334	0.1434	-0.10819	0.679373	-0.0670546	0.798182	-0.556838	0.0202434
ENSRNOG00000016550	Dclk2	310698	black	0.0517701	0.843572	-0.253088	0.327035	0.0756628	0.772875	0.533777	0.0273239	-0.169356	0.515817	-0.399194	0.112428	0.690641	0.0021451	-0.0881607	0.736521	0.296446	0.247933	0.662613	0.00374864	0.174062	0.504044	0.777852	0.000236779	-0.930387	6.26e-08	0.666061	0.00351048	0.31389	0.219849	-0.430324	0.0846699	0.653644	0.00442993
ENSRNOG00000005577	Desi1	315160	black	-0.0513181	0.844922	-0.0866198	0.740976	0.0919862	0.725494	0.475485	0.0537257	-0.272825	0.289385	-0.345558	0.174292	0.607655	0.00966888	-0.105023	0.688309	0.10798	0.679965	0.42024	0.0930496	0.261177	0.311274	0.592029	0.0122876	-0.822268	5.1e-05	0.501266	0.0403794	0.277687	0.280532	-0.139551	0.593215	0.66118	0.00385133
ENSRNOG00000013813	Ubtd1	309373	black	0.0500404	0.848741	-0.444073	0.0741434	-0.0726969	0.781571	0.401338	0.110334	-0.0790474	0.762982	-0.0886238	0.735183	0.617195	0.00830299	0.0858925	0.743082	0.395859	0.115742	0.602917	0.0104107	0.249759	0.333651	0.755718	0.000450094	-0.846736	1.81e-05	0.766032	0.000336508	0.458687	0.0640393	-0.595687	0.0116294	0.28885	0.260833
ENSRNOG00000003866	Cxcr4	60628	black	-0.0493363	0.850847	-0.228327	0.378082	0.105624	0.686612	0.433788	0.0819217	0.0425294	0.871252	-0.303691	0.23601	0.473776	0.0547139	-0.0660885	0.801034	0.350536	0.167756	0.622242	0.00764556	0.117302	0.653893	0.628117	0.00693335	-0.622972	0.00755391	0.568145	0.0173429	0.163052	0.531786	-0.400931	0.110729	0.365322	0.149321
ENSRNOG00000011628	Krt27	450229	black	-0.0482772	0.854016	-0.227312	0.380263	0.209844	0.41888	0.545988	0.0233702	0.216227	0.404536	-0.291505	0.256279	0.212286	0.413361	-0.385148	0.126848	0.608892	0.00948229	0.514672	0.0345215	-0.0723801	0.782501	0.832689	3.35e-05	-0.727439	0.000935005	0.259018	0.315435	-0.0460305	0.860746	-0.124039	0.63528	0.0944425	0.718441
ENSRNOG00000012258	Rras2	365355	black	-0.0476471	0.855903	-0.180286	0.48867	-0.148126	0.570468	0.157691	0.545542	-0.370413	0.143309	-0.299219	0.243326	0.415864	0.0968652	0.0524528	0.841534	-0.102023	0.696811	0.314035	0.219625	-0.0812884	0.756451	0.248383	0.33641	-0.479173	0.0516382	0.29588	0.24888	0.269074	0.29633	-0.230221	0.37403	0.532809	0.0276581
ENSRNOG00000001174	Pde9a	191569	black	-0.0459446	0.861004	-0.0602205	0.81841	-0.0744491	0.77643	-0.366761	0.147605	0.235725	0.362391	0.160875	0.537354	-0.564975	0.0181209	-0.0728308	0.781178	0.0356136	0.892062	-0.0775922	0.767231	-0.236194	0.361408	-0.453344	0.067608	0.662559	0.00375247	-0.348837	0.169968	-0.0598466	0.81952	-0.0374243	0.886606	-0.690392	0.00215631
ENSRNOG00000016750	Cyp26a1	154985	black	-0.0455763	0.862108	0.189462	0.466426	0.0184077	0.944097	-0.409276	0.102819	0.251749	0.329686	0.0519919	0.84291	-0.708181	0.00146605	-0.147849	0.571195	-0.124456	0.634133	-0.294605	0.251022	-0.376531	0.136305	-0.621556	0.00773229	0.85429	1.27e-05	-0.630868	0.00661882	-0.276306	0.283029	0.243104	0.347112	-0.579655	0.0147353
ENSRNOG00000059857	Rnd1	362993	black	-0.0454844	0.862383	0.130542	0.617507	-0.14201	0.586655	-0.580716	0.0145116	0.153539	0.556302	0.388603	0.123187	-0.685824	0.00237096	0.111367	0.67045	-0.275942	0.28369	-0.519836	0.0324478	-0.190306	0.464405	-0.794989	0.000136839	0.948902	6.5e-09	-0.649043	0.00481646	-0.274814	0.285742	0.293976	0.252084	-0.64764	0.0049396
ENSRNOG00000003104	Trpv2	29465	black	0.043766	0.867539	0.0434404	0.868516	-0.211111	0.416011	-0.576547	0.0154068	0.12427	0.634644	0.42573	0.0884169	-0.497166	0.0423131	0.307379	0.230081	-0.26475	0.304459	-0.412851	0.0995571	-0.182572	0.483082	-0.716532	0.00121153	0.847776	1.73e-05	-0.426982	0.0873838	-0.173419	0.505646	-0.00697578	0.978802	-0.479485	0.0514645
ENSRNOG00000018105	Thtpa	305889	black	0.0428834	0.870188	0.262384	0.308961	-0.0843297	0.747612	-0.429462	0.0853634	-0.0891619	0.73363	0.265009	0.303968	-0.198864	0.444168	0.28473	0.268001	-0.483977	0.0490106	-0.460492	0.0628659	0.0944894	0.718306	-0.691641	0.00210051	0.63668	0.00599174	-0.304046	0.235435	-0.16223	0.533887	0.232459	0.369272	0.0198021	0.93987
ENSRNOG00000021468	Grm8	60590	black	-0.040053	0.878695	0.311813	0.223081	-0.116305	0.656664	-0.527309	0.0296171	-0.0613697	0.815001	0.180148	0.489007	-0.47687	0.0529346	0.181829	0.484895	-0.543026	0.0242855	-0.624361	0.00738217	-0.285104	0.267346	-0.820502	5.47e-05	0.879151	3.36e-06	-0.711426	0.00136238	-0.434192	0.081605	0.542188	0.0245496	-0.203125	0.434263
ENSRNOG00000049792	Glra3	114516	black	0.039698	0.879763	0.203764	0.432787	-0.0883399	0.736003	-0.313912	0.219815	-0.095453	0.715545	0.28068	0.275164	-0.0272682	0.917261	0.378408	0.134205	-0.404599	0.107201	-0.305003	0.233889	0.285857	0.266029	-0.555938	0.0204899	0.467575	0.0584147	0.00424631	0.987095	0.0560274	0.830876	-0.0614548	0.814748	0.0799996	0.760205
ENSRNOG00000048682	Zwint	257644	black	-0.0384144	0.883625	0.0960855	0.713735	-0.0715271	0.785007	-0.350893	0.167294	0.253608	0.326007	0.0970849	0.710877	-0.510056	0.03646	0.0904831	0.729821	-0.134014	0.608098	-0.310184	0.225636	-0.479236	0.0516028	-0.419715	0.0935016	0.703899	0.00161271	-0.658545	0.00404621	-0.563813	0.018413	0.308219	0.228745	-0.318069	0.213439
ENSRNOG00000021140	Kcnk4	116489	black	0.0381811	0.884327	0.0070902	0.978454	-0.116664	0.655665	-0.526543	0.0298979	0.260338	0.312887	0.358331	0.157856	-0.74102	0.000665669	-0.0223822	0.932051	-0.0615595	0.814438	-0.368908	0.145068	-0.314379	0.219092	-0.652582	0.00451683	0.868553	6.12e-06	-0.630004	0.00671637	-0.296971	0.247057	0.16238	0.533502	-0.79199	0.000151157
ENSRNOG00000005034	Arhgef25	314904	black	-0.0354856	0.892447	-0.305295	0.233419	-0.00280645	0.991471	0.432462	0.0829654	-0.0477387	0.855628	-0.137792	0.597927	0.500795	0.0405977	0.000128369	0.99961	0.354911	0.16215	0.444435	0.0738793	0.0907635	0.729013	0.727467	0.000934353	-0.781995	0.000208296	0.525202	0.0303951	0.18107	0.48675	-0.302596	0.237787	0.29283	0.254024
ENSRNOG00000020481	Pafah1b3	114113	black	-0.0329487	0.900099	0.17337	0.505766	0.00861952	0.973808	-0.409572	0.102546	0.312134	0.22258	0.323393	0.205448	-0.574254	0.0159174	0.0484516	0.853494	-0.103997	0.691214	-0.425962	0.0882245	-0.139221	0.594098	-0.559649	0.0194895	0.787545	0.000174685	-0.477211	0.0527409	-0.316678	0.215559	0.282371	0.272158	-0.568418	0.0172771
ENSRNOG00000024577	Gamt	25257	black	0.0313681	0.90487	-0.0195511	0.94063	0.00393972	0.988027	0.34668	0.172804	-0.380228	0.13219	-0.462693	0.0614569	0.630529	0.00665692	0.0113471	0.965524	-0.116423	0.656335	0.290164	0.258573	0.0530689	0.839695	0.438126	0.0785714	-0.668148	0.00337244	0.429021	0.0857205	0.249241	0.334688	-0.0787193	0.763939	0.720155	0.00111306
ENSRNOG00000006472	Hspa2	60460	black	-0.0291905	0.911449	-0.385134	0.126863	0.0863729	0.741691	0.452685	0.0680575	0.123232	0.637499	-0.153268	0.557006	0.394947	0.11666	-0.183082	0.481838	0.582816	0.0140763	0.698441	0.00181689	0.284808	0.267864	0.75439	0.000466793	-0.756678	0.000438327	0.746144	0.000582478	0.530244	0.0285586	-0.608438	0.0095505	0.0339187	0.897172
ENSRNOG00000018752	Clcf1	365395	black	-0.0282949	0.914156	-0.272096	0.290727	-0.10153	0.698212	0.326848	0.200368	-0.359836	0.155992	-0.24386	0.345568	0.64533	0.00514796	0.0400957	0.878566	0.0240264	0.927071	0.385886	0.126059	0.219771	0.396688	0.530578	0.0284402	-0.773319	0.000271604	0.508383	0.0371827	0.339141	0.182966	-0.111308	0.670615	0.592698	0.012165
ENSRNOG00000014862	Gabrg3	79211	black	0.0278311	0.915559	0.222342	0.391045	-0.191865	0.460685	-0.43798	0.0786826	-0.155061	0.552347	0.380204	0.132216	-0.0843623	0.747517	0.518517	0.032968	-0.530345	0.0285229	-0.481776	0.0502018	0.228235	0.37828	-0.693135	0.00203525	0.605841	0.00994772	-0.0611202	0.815741	0.105734	0.686299	-0.030174	0.908477	-0.0287637	0.912739
ENSRNOG00000008015	Fos	314322	black	0.0277344	0.915851	0.105282	0.687577	-0.193312	0.457245	-0.472439	0.055497	-0.0220707	0.932995	0.503177	0.039501	-0.421097	0.0923151	0.259602	0.314307	-0.31168	0.223288	-0.584212	0.0137929	-0.0516679	0.843877	-0.61517	0.00857922	0.618781	0.0080917	-0.527802	0.0294371	-0.249209	0.334753	0.255092	0.323086	-0.358733	0.157357
ENSRNOG00000060694	Adam17	57027	black	0.0271448	0.917634	-0.21426	0.408929	0.0487753	0.852525	0.44124	0.0762296	-0.255297	0.322685	-0.52073	0.0320983	0.587554	0.0131325	-0.18741	0.471355	0.174976	0.501772	0.630379	0.00667389	0.0657235	0.802112	0.612328	0.00897905	-0.797813	0.00012441	0.564278	0.0182955	0.393984	0.117635	-0.333868	0.190303	0.609456	0.00939816
ENSRNOG00000042179	Cfap20	307642	black	0.0250851	0.923866	-0.49458	0.043568	-0.0340695	0.896717	0.384652	0.127379	0.1379	0.597638	-0.0705436	0.7879	0.389736	0.122003	-0.00919772	0.972052	0.585599	0.0135157	0.705072	0.0015714	0.114801	0.660851	0.745086	0.000598899	-0.693999	0.00199831	0.674357	0.00298759	0.403649	0.108107	-0.73759	0.00072668	0.0756769	0.772833
ENSRNOG00000009153	Cidec	500292	black	-0.0236604	0.928179	-0.32605	0.201536	-0.117755	0.652634	0.240473	0.352518	-0.0673508	0.797307	-0.0394529	0.8805	0.549981	0.0221788	0.270036	0.294539	0.179464	0.490689	0.436751	0.0796228	0.239812	0.353881	0.496597	0.0425865	-0.543335	0.0241887	0.661837	0.00380398	0.367848	0.146317	-0.492501	0.0445973	0.322251	0.207146
ENSRNOG00000012942	Satb1	316164	black	0.0235695	0.928455	0.139916	0.59224	-0.143632	0.582343	-0.58466	0.0137028	0.0634545	0.808823	0.392519	0.119129	-0.662505	0.00375629	0.0208082	0.93682	-0.319027	0.211986	-0.624035	0.00742229	-0.141644	0.587628	-0.796152	0.000131599	0.880077	3.18e-06	-0.656408	0.00421012	-0.209215	0.420308	0.475397	0.0537761	-0.687051	0.00231164
ENSRNOG00000017118	P4ha3	361612	black	-0.0231018	0.929871	0.101579	0.698071	-0.0896751	0.732149	-0.513591	0.0349681	0.153659	0.555989	0.367834	0.146333	-0.648679	0.00484819	0.0144352	0.956149	-0.191302	0.462027	-0.428937	0.0857884	-0.101113	0.699396	-0.714456	0.0012711	0.843557	2.09e-05	-0.575708	0.015592	-0.234125	0.365753	0.262633	0.308485	-0.696196	0.00190683
ENSRNOG00000031612	Gls2	192268	black	-0.0224893	0.931727	-0.0383345	0.883866	-0.282236	0.272399	-0.570328	0.0168224	0.0573919	0.826815	0.540726	0.0250153	-0.554306	0.0209422	0.262898	0.307981	-0.241146	0.351129	-0.468428	0.0578951	-0.052411	0.841659	-0.706262	0.00153035	0.778421	0.000232686	-0.440524	0.0767633	-0.0345772	0.895186	0.0536174	0.838059	-0.652465	0.00452654
ENSRNOG00000027156	Morn4	293950	black	-0.0190366	0.94219	0.1371	0.599784	-0.181593	0.485471	-0.549057	0.0224502	0.0206723	0.937232	0.329521	0.196496	-0.408194	0.103821	0.301121	0.240197	-0.385225	0.126765	-0.422811	0.0908587	-0.0813325	0.756322	-0.745179	0.000597442	0.800757	0.000112479	-0.366502	0.147913	-0.0615601	0.814436	0.0573604	0.826909	-0.31661	0.215662
ENSRNOG00000016636	Lpin3	362261	black	0.0187748	0.942984	0.109325	0.67618	-0.202004	0.436857	-0.617962	0.00820026	-0.0217284	0.934031	0.4221	0.0914611	-0.553179	0.0212591	0.138042	0.597256	-0.38177	0.130499	-0.574185	0.015933	-0.049527	0.850277	-0.837935	2.68e-05	0.850902	1.49e-05	-0.465997	0.0593859	-0.00965621	0.970659	0.281129	0.274364	-0.626699	0.00710023
ENSRNOG00000040287	Cyp1b1	25426	black	0.0179124	0.945599	-0.231793	0.370685	0.064946	0.80441	0.513184	0.0351378	-0.130637	0.617248	-0.127541	0.625684	0.685647	0.00237963	0.0192076	0.941672	0.31272	0.221666	0.514721	0.0345015	0.473762	0.0547223	0.728398	0.000913413	-0.918506	1.97e-07	0.826419	4.33e-05	0.484442	0.0487618	-0.48191	0.0501284	0.471058	0.0563143
ENSRNOG00000013953	Ntrk1	59109	black	-0.0168319	0.948877	-0.363538	0.151469	-0.16304	0.531817	0.38234	0.129878	-0.268649	0.297124	-0.124569	0.633823	0.753545	0.000477698	0.275727	0.28408	0.141511	0.587984	0.489353	0.0461906	0.250443	0.332285	0.65061	0.00468188	-0.841532	2.29e-05	0.772214	0.000280712	0.44667	0.0722674	-0.524172	0.0307811	0.588792	0.0128942
ENSRNOG00000015084	Necab2	170928	black	0.0165158	0.949835	-0.205953	0.427753	0.0210088	0.936212	0.407206	0.104743	-0.000158185	0.999519	-0.133714	0.608909	0.566216	0.0178131	0.161634	0.535409	0.275397	0.284681	0.419283	0.0938747	0.154649	0.553415	0.673506	0.00303813	-0.691569	0.0021037	0.570161	0.0168617	0.170281	0.513493	-0.411191	0.101062	0.474184	0.0544768
ENSRNOG00000053201	Gpcpd1	362219	black	0.016247	0.950651	0.293643	0.252647	0.0672293	0.797666	-0.312107	0.222623	0.112619	0.666944	-0.184886	0.477455	-0.529653	0.0287694	-0.16184	0.534883	-0.255908	0.321487	-0.271352	0.292101	-0.531813	0.0280049	-0.564501	0.0182396	0.732095	0.000834046	-0.684278	0.00244744	-0.501486	0.0402773	0.370357	0.143373	-0.197972	0.446257
ENSRNOG00000015036	Ccn2	64032	black	0.0147358	0.955237	0.0649013	0.804543	-0.133732	0.608862	-0.445788	0.0729005	0.107569	0.681122	0.107624	0.680967	-0.463142	0.0611722	0.0864172	0.741562	-0.254652	0.32395	-0.346953	0.172443	-0.424822	0.0891707	-0.550549	0.0220132	0.733145	0.00081257	-0.591912	0.0123091	-0.444725	0.0736689	0.347929	0.171158	-0.374674	0.138405
ENSRNOG00000005492	Hpcal1	50871	black	0.0143183	0.956504	0.114377	0.662034	-0.251649	0.329886	-0.653891	0.00440991	-0.00945182	0.97128	0.578065	0.015076	-0.464688	0.0602003	0.359901	0.155912	-0.445828	0.072872	-0.679259	0.00270971	0.0106369	0.967681	-0.850579	1.52e-05	0.876188	4e-06	-0.44997	0.0699349	-0.140881	0.589663	0.299012	0.243668	-0.524961	0.0304848
ENSRNOG00000028844	Slc9a5	192215	black	-0.0134454	0.959153	0.221255	0.393424	0.051756	0.843614	-0.415169	0.0974818	0.329497	0.19653	0.216293	0.40439	-0.714052	0.00128298	-0.0792929	0.762266	-0.104698	0.689228	-0.394937	0.11667	-0.274972	0.285456	-0.640449	0.00561136	0.895085	1.22e-06	-0.678813	0.00273407	-0.48503	0.0484483	0.323148	0.205813	-0.603908	0.0102519
ENSRNOG00000023528	Hrasls5	293711	black	-0.0125792	0.961783	-0.289987	0.258877	0.0126332	0.961619	0.465014	0.0599963	-0.198829	0.444251	-0.301312	0.239884	0.654115	0.00439183	-0.0718558	0.784041	0.277541	0.280794	0.578892	0.014898	0.236582	0.360597	0.721572	0.00107637	-0.908892	4.42e-07	0.77746	0.000239635	0.557207	0.0201434	-0.434528	0.0813426	0.466103	0.0593199
ENSRNOG00000000763	RT1-M3-1	24747	black	-0.0123165	0.962581	-0.454175	0.0670433	-0.233573	0.366917	0.257597	0.318193	-0.157844	0.545146	0.0441583	0.866361	0.518006	0.0331715	0.242282	0.348795	0.22311	0.389369	0.351756	0.166179	0.151614	0.561322	0.596057	0.0115644	-0.685042	0.0024094	0.566459	0.0177533	0.399554	0.112075	-0.400217	0.111425	0.235864	0.362101
ENSRNOG00000048239	Cxcr1	54258	black	-0.0122335	0.962833	-0.31107	0.224245	0.101504	0.698284	0.558249	0.0198622	-0.00389692	0.988157	-0.39354	0.118086	0.51712	0.0335264	-0.23254	0.369102	0.459738	0.0633544	0.65155	0.00460265	0.0308179	0.906532	0.869733	5.74e-06	-0.906855	5.19e-07	0.538742	0.0256584	0.198917	0.444044	-0.296639	0.247611	0.424399	0.0895246
ENSRNOG00000009058	Spata21	366491	black	-0.0107897	0.967217	0.210658	0.417036	-0.00600675	0.981746	-0.36207	0.153252	0.164726	0.527524	0.178191	0.493819	-0.615646	0.00851357	-0.023645	0.928226	-0.161021	0.536979	-0.365666	0.14891	-0.320003	0.210513	-0.613494	0.00881328	0.765299	0.000343696	-0.623095	0.00753869	-0.416024	0.0967236	0.188424	0.468917	-0.477981	0.052306
ENSRNOG00000050090	Slc6a17	613226	black	-0.00706759	0.978523	0.328513	0.19795	-0.110175	0.673792	-0.581451	0.014358	0.00235162	0.992853	0.402792	0.108929	-0.519223	0.0326885	0.268728	0.296976	-0.502909	0.0396234	-0.682493	0.00253823	-0.0484769	0.853418	-0.895462	1.19e-06	0.935712	3.5e-08	-0.607149	0.00974612	-0.288027	0.262256	0.352585	0.165114	-0.353152	0.164388
ENSRNOG00000016412	Fxyd6	63847	black	-0.00704539	0.97859	0.261988	0.30972	-0.0311976	0.905385	-0.52763	0.0294998	0.171786	0.509721	0.270617	0.293461	-0.643656	0.00530323	0.0443696	0.865727	-0.315029	0.21809	-0.55737	0.020099	-0.256849	0.319649	-0.776763	0.000244784	0.94076	1.92e-08	-0.715517	0.00124034	-0.460324	0.0629747	0.461255	0.0623748	-0.473419	0.0549221
ENSRNOG00000005109	Rprm	680110	black	-0.00489786	0.985115	0.140742	0.590033	-0.269736	0.295097	-0.62551	0.00724248	-0.058615	0.823179	0.486634	0.0476013	-0.382879	0.129291	0.44001	0.0771481	-0.512332	0.0354943	-0.616921	0.00833989	0.00574965	0.982527	-0.852143	1.41e-05	0.866097	6.98e-06	-0.38042	0.131978	-0.0820602	0.754205	0.190916	0.462948	-0.369204	0.14472
ENSRNOG00000008048	Plscr1	117540	black	0.00298807	0.990919	-0.383881	0.128209	-0.0156414	0.952488	0.458102	0.0644233	-0.130603	0.617341	-0.160609	0.538036	0.654974	0.00432307	0.0284685	0.913632	0.369252	0.144664	0.674877	0.00295707	0.351634	0.166337	0.7337	0.000801419	-0.886494	2.15e-06	0.82826	4.02e-05	0.524985	0.0304759	-0.635873	0.00607585	0.384187	0.127879
ENSRNOG00000011623	Rab3c	171058	black	0.00249269	0.992424	-0.00943682	0.971326	-0.248199	0.336779	-0.525764	0.0301859	0.0502991	0.847968	0.512919	0.0352483	-0.437341	0.0791699	0.351267	0.16681	-0.252877	0.327451	-0.39882	0.112797	-0.0252512	0.923364	-0.652262	0.00454331	0.728295	0.000915711	-0.410883	0.101343	-0.143523	0.582631	-0.0237318	0.927963	-0.479837	0.051269
ENSRNOG00000060108	Olr399	366026	black	0.00232822	0.992924	0.291059	0.257041	0.0741798	0.77722	-0.155253	0.551849	0.103842	0.691652	-0.00585303	0.982213	-0.368746	0.145259	-0.0860881	0.742515	-0.162161	0.534063	-0.401273	0.110396	-0.319148	0.211803	-0.282689	0.271596	0.384554	0.127484	-0.551007	0.0218804	-0.388081	0.123736	0.411694	0.100604	-0.0665422	0.799694
ENSRNOG00000017975	Dnajb13	308857	black	-0.00193117	0.994131	-0.419575	0.0936223	-0.119537	0.647696	0.411324	0.100941	-0.245444	0.342343	-0.252949	0.327308	0.648155	0.00489419	0.0220439	0.933076	0.237362	0.358969	0.544643	0.0237825	0.0730152	0.780636	0.721509	0.00107798	-0.883542	2.58e-06	0.603448	0.0103255	0.31608	0.216474	-0.317385	0.21448	0.489163	0.0462884
ENSRNOG00000016093	Hyal3	300993	black	-0.00147159	0.995528	-0.194014	0.45558	-0.361324	0.154163	-0.607549	0.00968499	0.0110313	0.966483	0.632135	0.00647776	-0.406167	0.105718	0.379216	0.133308	-0.204589	0.430887	-0.33687	0.186101	0.0659708	0.801382	-0.661425	0.0038336	0.69028	0.00216139	-0.193838	0.455999	0.165891	0.524568	-0.160042	0.539489	-0.659019	0.00401059
ENSRNOG00000047545	Adra2a	25083	black	0.000572692	0.99826	0.369855	0.143959	0.108397	0.67879	-0.355846	0.160968	0.230708	0.372991	0.296053	0.248591	-0.454502	0.0668225	0.102538	0.69535	-0.227132	0.380651	-0.484045	0.0489744	0.0384853	0.883412	-0.61995	0.00793877	0.762482	0.000372532	-0.406134	0.105749	-0.298394	0.244692	0.261607	0.310449	-0.346169	0.17348
ENSRNOG00000046975	Sult4a1	58953	black	0.000498591	0.998485	0.0641282	0.806829	-0.133817	0.608631	-0.541892	0.0246432	0.232381	0.369438	0.585432	0.0135488	-0.6299	0.00672821	0.173248	0.506071	-0.142715	0.584779	-0.520044	0.0323662	0.00918362	0.972095	-0.68267	0.0025291	0.837912	2.68e-05	-0.495717	0.0430126	-0.184308	0.478858	0.172735	0.507351	-0.730243	0.000873064
ENSRNOG00000008001	Rab3b	81755	black	-1.54e-05	0.999953	0.221098	0.393769	-0.0987644	0.706082	-0.537086	0.0262049	0.0691669	0.791953	0.351212	0.166881	-0.489075	0.0463337	0.180727	0.487589	-0.394659	0.116951	-0.588497	0.0129508	-0.101469	0.698385	-0.764057	0.000356178	0.85775	1.07e-05	-0.581369	0.0143752	-0.367659	0.14654	0.451183	0.0690917	-0.400811	0.110846
ENSRNOG00000025570	Os9	362891	blue	-0.901054	8.02e-07	0.691401	0.00211111	0.660935	0.00386918	0.606936	0.00977868	0.497194	0.0422994	-0.45126	0.0690386	-0.46469	0.060199	-0.48763	0.0470807	0.312788	0.22156	0.250142	0.332887	0.285266	0.267062	0.131354	0.615301	0.14691	0.57367	-0.0944642	0.718378	-0.0140556	0.957301	0.011201	0.965968	-0.133858	0.608519
ENSRNOG00000016580	Rps23	124323	blue	0.88651	2.15e-06	-0.808828	8.46e-05	-0.724527	0.00100313	-0.584471	0.0137408	-0.650726	0.00467208	0.394145	0.117471	0.529573	0.028798	0.365148	0.149531	-0.327864	0.198892	-0.187526	0.471077	-0.191004	0.462738	-0.081534	0.755736	-0.304865	0.234111	0.176746	0.497387	0.219712	0.396818	0.0720878	0.78336	0.0801851	0.759664
ENSRNOG00000020433	Actn4	63836	blue	-0.881902	2.85e-06	0.735859	0.000759181	0.683334	0.00249511	0.641744	0.00548523	0.419088	0.0940437	-0.408978	0.103095	-0.300517	0.241187	-0.388105	0.12371	0.265986	0.302122	0.288828	0.260871	0.487682	0.0470538	0.144231	0.580753	0.0391637	0.88137	0.0969136	0.711366	0.135123	0.605105	-0.152359	0.559375	0.0444523	0.865479
ENSRNOG00000007234	Cyp51	25427	blue	0.874957	4.29e-06	-0.783407	0.000199274	-0.619858	0.00795071	-0.56714	0.0175867	-0.400897	0.110762	0.303874	0.235713	0.307934	0.229197	0.249332	0.334505	-0.141319	0.588494	-0.051178	0.845341	-0.423553	0.0902337	-0.0724793	0.78221	-0.134185	0.607636	0.0286875	0.91297	0.0255894	0.92234	-0.073902	0.778034	-0.0618104	0.813694
ENSRNOG00000015741	Slc2a13	171147	blue	-0.873653	4.62e-06	0.83555	2.97e-05	0.796558	0.000129811	0.656738	0.00418445	0.662672	0.00374443	-0.48957	0.0460797	-0.522557	0.0313938	-0.48193	0.0501175	0.372151	0.141294	0.235601	0.362652	0.14928	0.567433	0.153637	0.556046	0.235065	0.363777	-0.232694	0.368775	-0.348401	0.170538	0.0115745	0.964833	-0.0479858	0.854889
ENSRNOG00000037446	Pxmp2	29533	blue	0.867486	6.48e-06	-0.712172	0.00133942	-0.588876	0.0128782	-0.566323	0.0177867	-0.336635	0.186428	0.571896	0.0164563	0.359381	0.156554	0.397362	0.11424	-0.135707	0.603531	-0.207068	0.425201	-0.0742014	0.777156	-0.0944707	0.71836	-0.132624	0.611857	0.205887	0.427905	0.174	0.504197	-0.109039	0.676985	-0.120502	0.645026
ENSRNOG00000010807	Cox6c	54322	blue	0.851694	1.44e-05	-0.830941	3.6e-05	-0.798924	0.000119787	-0.747152	0.000567167	-0.50954	0.0366817	0.618533	0.00812439	0.325161	0.202839	0.514655	0.0345287	-0.303464	0.236378	-0.263233	0.307341	-0.166441	0.523173	-0.285284	0.267031	-0.0165938	0.949599	0.190875	0.463046	0.333175	0.191281	-0.171369	0.510766	-0.228181	0.378395
ENSRNOG00000007644	Mbtps2	302705	blue	-0.850314	1.53e-05	0.673703	0.00302633	0.794076	0.000141073	0.797378	0.00012626	0.725747	0.000974092	-0.577994	0.0150913	-0.488309	0.0467286	-0.577695	0.0151562	0.591684	0.0123512	0.473331	0.0549736	0.0989256	0.705623	0.409294	0.102803	0.0285726	0.913317	-0.159896	0.539866	-0.283327	0.270469	-0.170652	0.512564	-0.055043	0.833808
ENSRNOG00000010473	Cand2	192226	blue	0.850272	1.54e-05	-0.824897	4.6e-05	-0.893296	1.38e-06	-0.787005	0.000177741	-0.733677	0.00080188	0.580465	0.0145643	0.529981	0.0286522	0.655425	0.00428729	-0.518132	0.0331212	-0.331039	0.194318	-0.15889	0.542453	-0.325644	0.202129	-0.101001	0.699715	0.269358	0.295802	0.410058	0.1021	-0.0822355	0.753695	0.0448708	0.864224
ENSRNOG00000016429	Grm5	24418	blue	-0.849656	1.58e-05	0.848116	1.7e-05	0.873816	4.58e-06	0.774065	0.000265596	0.686561	0.00233521	-0.615428	0.00854353	-0.499711	0.0411045	-0.619413	0.00800868	0.458158	0.0643867	0.342377	0.178556	0.174956	0.501821	0.277228	0.281361	0.11478	0.660911	-0.206399	0.42673	-0.301539	0.239512	0.00247945	0.992465	0.031617	0.904119
ENSRNOG00000027503	Rps25	122799	blue	0.849487	1.6e-05	-0.761848	0.000379294	-0.733777	0.000799874	-0.680887	0.00262222	-0.650188	0.00471784	0.467371	0.0585397	0.477229	0.0527307	0.409924	0.102222	-0.4106	0.101602	-0.287709	0.262807	-0.170282	0.51349	-0.219145	0.398068	-0.169072	0.516533	0.129171	0.621238	0.206834	0.425734	0.161917	0.534685	0.055725	0.831777
ENSRNOG00000002693	Nme1	191575	blue	0.842479	2.2e-05	-0.708155	0.0014669	-0.598105	0.0112098	-0.677559	0.00280359	-0.308614	0.228117	0.499934	0.0409998	0.163862	0.529722	0.315403	0.217515	-0.160965	0.537122	-0.179502	0.490594	-0.30886	0.227727	-0.259571	0.314367	0.0842849	0.747742	-0.0206268	0.93737	0.0141041	0.957154	-0.090619	0.729429	-0.233292	0.36751
ENSRNOG00000031022	Rpl36al	81769	blue	0.842227	2.22e-05	-0.777031	0.000242795	-0.802349	0.000106438	-0.757317	0.00043064	-0.60996	0.00932351	0.763773	0.000359084	0.441622	0.0759457	0.601186	0.0106928	-0.414713	0.0978869	-0.434666	0.0812355	0.0320745	0.902738	-0.310668	0.224875	-0.0809994	0.757292	0.211981	0.414048	0.29654	0.247777	0.043267	0.869037	-0.139022	0.59463
ENSRNOG00000012410	S100a1	295214	blue	0.840632	2.38e-05	-0.746114	0.000582933	-0.739828	0.000686375	-0.675851	0.00290055	-0.512923	0.0352466	0.364379	0.150454	0.399616	0.112013	0.509768	0.0365838	-0.367747	0.146436	-0.206018	0.427605	-0.480385	0.0509654	-0.221247	0.393444	-0.0160367	0.951289	0.0362471	0.890152	-0.0212219	0.935566	-0.0197388	0.940061	0.0936028	0.720849
ENSRNOG00000050978	Hmgn1	360704	blue	0.840279	2.42e-05	-0.895313	1.2e-06	-0.831072	3.58e-05	-0.637399	0.00591761	-0.617718	0.0082329	0.621196	0.00777821	0.588747	0.0129028	0.63299	0.00638405	-0.311296	0.22389	-0.190474	0.464003	-0.0395157	0.880311	-0.0991688	0.70493	-0.272281	0.290386	0.377853	0.134823	0.389963	0.121766	-0.205209	0.42946	0.000725576	0.997795
ENSRNOG00000003065	Glyr1	360477	blue	-0.839669	2.49e-05	0.723576	0.00102624	0.644508	0.0052237	0.414881	0.0977376	0.560881	0.019166	-0.282423	0.272067	-0.607743	0.00965558	-0.422321	0.0912737	0.24239	0.348574	0.108246	0.679216	0.249213	0.334744	-0.0817287	0.755169	0.390154	0.121569	-0.309516	0.22669	-0.224389	0.386584	0.0952303	0.716183	-0.194578	0.454245
ENSRNOG00000008897	Gga1	300066	blue	-0.837188	2.77e-05	0.900183	8.54e-07	0.892126	1.49e-06	0.685426	0.00239044	0.691343	0.00211371	-0.586954	0.0132491	-0.58312	0.0140144	-0.673511	0.00303781	0.407023	0.104914	0.22624	0.382576	0.155476	0.551271	0.180058	0.489229	0.214183	0.4091	-0.305111	0.233715	-0.319595	0.211129	0.159567	0.540711	-0.0650713	0.80404
ENSRNOG00000045648	Olr20	293083	blue	-0.835884	2.93e-05	0.825801	4.44e-05	0.791937	0.000151424	0.647473	0.0049545	0.640397	0.00561648	-0.624378	0.00738018	-0.569074	0.0171199	-0.566745	0.0176832	0.35692	0.159618	0.270532	0.293619	-0.065953	0.801434	0.155461	0.551309	0.253169	0.326873	-0.396459	0.115141	-0.470534	0.0566266	0.095811	0.71452	0.0625918	0.811378
ENSRNOG00000004464	Sel1l	314352	blue	-0.833013	3.31e-05	0.837453	2.74e-05	0.895529	1.19e-06	0.83187	3.47e-05	0.636055	0.00605683	-0.637807	0.00587595	-0.357747	0.158584	-0.59702	0.0113965	0.465757	0.0595341	0.420214	0.0930718	0.242539	0.348268	0.357164	0.159313	-0.0234099	0.928938	-0.0792468	0.7624	-0.265783	0.302505	-0.0696819	0.790436	0.186216	0.474235
ENSRNOG00000028021	LOC684988	161477	blue	0.821033	5.36e-05	-0.86452	7.58e-06	-0.789232	0.000165418	-0.645271	0.00515338	-0.626157	0.0071648	0.489468	0.0461319	0.529505	0.0288225	0.494253	0.043729	-0.318739	0.212423	-0.155444	0.551354	-0.137625	0.598376	-0.123207	0.637568	-0.24405	0.345179	0.314233	0.219318	0.423981	0.0898737	-0.117772	0.652588	0.0184845	0.943864
ENSRNOG00000018068	Ndufs6	29478	blue	0.820832	5.4e-05	-0.777481	0.000239486	-0.83821	2.65e-05	-0.82175	5.21e-05	-0.573481	0.0160924	0.646388	0.00505166	0.317569	0.2142	0.584458	0.0137435	-0.454041	0.0671342	-0.456028	0.0657972	-0.281902	0.27299	-0.360844	0.154751	0.0693577	0.791391	-0.0353737	0.892785	0.0876646	0.737954	0.168116	0.51894	-0.127566	0.625615
ENSRNOG00000003626	Atp5pd	641434	blue	0.820176	5.54e-05	-0.89871	9.49e-07	-0.697118	0.00186944	-0.478749	0.0518749	-0.535493	0.026739	0.462456	0.0616073	0.550734	0.0219596	0.376551	0.136282	-0.110856	0.671882	-0.00146665	0.995543	-0.0703162	0.788569	0.0733144	0.779758	-0.421287	0.0921528	0.428227	0.0863651	0.451949	0.0685628	-0.261888	0.309911	-0.0290578	0.91185
ENSRNOG00000004524	Desi2	289277	blue	0.815473	6.62e-05	-0.747775	0.000557889	-0.562922	0.0186391	-0.461893	0.0619665	-0.339432	0.182565	0.522347	0.0314742	0.355985	0.160793	0.274236	0.286799	-0.0281191	0.914688	-0.124339	0.634456	-0.0204908	0.937782	0.0258449	0.921567	-0.280851	0.274859	0.311561	0.223476	0.350162	0.168242	-0.1797	0.490109	-0.209657	0.419304
ENSRNOG00000006787	Dhcr24	298298	blue	-0.814708	6.81e-05	0.896656	1.1e-06	0.834562	3.1e-05	0.563247	0.0185563	0.745813	0.000587582	-0.410977	0.101258	-0.672146	0.00312031	-0.528176	0.0293012	0.373855	0.139338	0.141265	0.588638	0.149575	0.566659	0.0145209	0.955889	0.405911	0.105959	-0.332801	0.191811	-0.378306	0.134318	0.0407127	0.876711	-0.171257	0.511046
ENSRNOG00000045665	Amigo1	295365	blue	-0.813482	7.13e-05	0.834524	3.1e-05	0.789902	0.000161854	0.507587	0.0375302	0.751542	0.000504357	-0.399686	0.111945	-0.759259	0.000407966	-0.545738	0.0234464	0.390436	0.121275	0.146951	0.573561	0.0521753	0.842362	-0.0113934	0.965383	0.475286	0.0538399	-0.468694	0.0577339	-0.431316	0.0838761	0.0824214	0.753154	-0.25891	0.315644
ENSRNOG00000005052	Slc39a9	314275	blue	-0.81311	7.23e-05	0.787903	0.000172684	0.80657	9.17e-05	0.628882	0.0068447	0.654126	0.00439097	-0.593099	0.012092	-0.568672	0.0172162	-0.600668	0.0107785	0.394765	0.116843	0.358324	0.157865	0.069246	0.79172	0.11698	0.654787	0.266441	0.301265	-0.291429	0.256409	-0.350537	0.167754	-0.0220218	0.933143	-0.00712749	0.978341
ENSRNOG00000060599	Gabrb3	24922	blue	-0.812134	7.5e-05	0.73977	0.000687388	0.728968	0.000900794	0.665632	0.00353941	0.47319	0.0550565	-0.605528	0.00999662	-0.423468	0.0903049	-0.583819	0.0138722	0.297384	0.246369	0.261888	0.309911	0.071179	0.786031	0.211048	0.416154	0.0754394	0.773529	-0.31558	0.217243	-0.377977	0.134685	0.21906	0.398255	0.114675	0.661203
ENSRNOG00000010267	Klhdc10	312199	blue	-0.810708	7.9e-05	0.889365	1.79e-06	0.715232	0.00124854	0.604254	0.010197	0.42736	0.0870736	-0.478181	0.0521934	-0.316342	0.216073	-0.331929	0.193049	0.111051	0.671337	0.0751791	0.774291	0.238691	0.356204	0.076313	0.770971	0.167714	0.519955	-0.211691	0.414701	-0.320932	0.209117	0.193163	0.457598	0.268044	0.298254
ENSRNOG00000004107	Rpl23	29282	blue	0.807797	8.78e-05	-0.848151	1.7e-05	-0.737653	0.000725523	-0.649378	0.00478747	-0.468773	0.0576858	0.378303	0.134321	0.29418	0.251739	0.320938	0.209109	-0.234642	0.364665	-0.20576	0.428196	-0.501049	0.0404798	-0.114072	0.662884	-0.0905946	0.729499	-0.0516357	0.843974	-0.00103264	0.996862	0.167792	0.519759	-0.130459	0.617731
ENSRNOG00000014901	Uggt1	171129	blue	-0.807482	8.88e-05	0.659597	0.00396748	0.80787	8.76e-05	0.79538	0.000135057	0.720373	0.00110734	-0.561004	0.019134	-0.48644	0.047703	-0.623291	0.00751421	0.617418	0.00827306	0.504309	0.0389881	0.177875	0.494599	0.393688	0.117935	0.0103667	0.968501	-0.0871684	0.739389	-0.189913	0.465345	-0.236353	0.361076	-0.105761	0.686224
ENSRNOG00000047287	Nucks1	64709	blue	0.806703	9.13e-05	-0.820482	5.47e-05	-0.657019	0.00416268	-0.501588	0.0402301	-0.406755	0.105165	0.239225	0.355097	0.41767	0.0952771	0.317014	0.215045	-0.142893	0.584304	-0.0441804	0.866295	-0.496957	0.0424131	0.0715651	0.784896	-0.245053	0.343138	0.0950499	0.7167	0.0370609	0.887701	-0.000640554	0.998053	0.0628168	0.810712
ENSRNOG00000010189	Rps24	81776	blue	0.806109	9.32e-05	-0.717296	0.00119018	-0.768158	0.000316366	-0.663964	0.00365379	-0.513945	0.0348216	0.596164	0.0115457	0.447331	0.0717962	0.676324	0.00287344	-0.377195	0.13556	-0.335782	0.187618	-0.180689	0.487683	-0.211979	0.414053	-0.0561787	0.830426	0.163511	0.530616	0.15539	0.551494	-0.0993391	0.704444	0.0158685	0.951799
ENSRNOG00000049743	Gstm3	64352	blue	0.803957	0.000100614	-0.843787	2.07e-05	-0.723193	0.00103568	-0.587936	0.0130586	-0.543815	0.0240389	0.354316	0.162905	0.489282	0.0462271	0.37934	0.13317	-0.268733	0.296967	-0.103591	0.692363	-0.282249	0.272376	-0.0715561	0.784922	-0.230113	0.374261	0.23063	0.373158	0.226528	0.381954	0.00661636	0.979894	0.0481698	0.854338
ENSRNOG00000054008	Scamp5	65171	blue	-0.8018	0.000108487	0.916475	2.36e-07	0.854417	1.26e-05	0.677837	0.00278808	0.603056	0.0103884	-0.592583	0.0121859	-0.464253	0.0604722	-0.544502	0.0238259	0.30893	0.227617	0.246407	0.340394	0.176601	0.497745	0.141493	0.588032	0.189135	0.467209	-0.244622	0.344014	-0.340599	0.18097	0.0457532	0.861578	0.137697	0.598183
ENSRNOG00000017817	Cox4i1	29445	blue	0.799042	0.000119306	-0.628926	0.00683967	-0.476271	0.0532758	-0.498127	0.0418533	-0.164331	0.528528	0.42854	0.0861106	0.235048	0.363812	0.304449	0.234783	-0.0317915	0.903592	-0.133833	0.608588	-0.285465	0.266713	-0.047095	0.857556	-0.0378694	0.885266	0.0857323	0.743546	-0.0250809	0.923879	-0.104408	0.69005	-0.139304	0.593876
ENSRNOG00000011260	Cmbl	310201	blue	0.795592	0.000134101	-0.702683	0.00165647	-0.51971	0.0324971	-0.527247	0.0296396	-0.182367	0.483581	0.504389	0.038952	0.215685	0.405743	0.275207	0.285027	-0.0136536	0.958521	-0.16175	0.535112	-0.211737	0.414597	-0.0536201	0.83805	-0.0552743	0.833119	0.112632	0.666909	0.0437444	0.867603	-0.0482313	0.854153	-0.280359	0.275736
ENSRNOG00000014621	Rab8a	117103	blue	0.789651	0.000163183	-0.846079	1.87e-05	-0.805547	9.51e-05	-0.63231	0.00645848	-0.668905	0.00332345	0.456586	0.0654258	0.524313	0.030728	0.485197	0.0483596	-0.354045	0.163249	-0.185373	0.476275	-0.214123	0.409234	-0.127957	0.624548	-0.270926	0.292889	0.276026	0.283538	0.376285	0.136582	-0.0908701	0.728706	0.0593457	0.821008
ENSRNOG00000009948	Pip4p1	364298	blue	0.785722	0.000185185	-0.759027	0.000410627	-0.792194	0.000150146	-0.790134	0.000160635	-0.582753	0.0140893	0.594916	0.0117657	0.346469	0.173083	0.508274	0.0372299	-0.438634	0.0781859	-0.357222	0.15924	-0.10929	0.67628	-0.383226	0.128916	0.035851	0.891346	0.166554	0.522888	0.330588	0.194964	0.0361425	0.890468	-0.180243	0.488776
ENSRNOG00000061814	LOC103693608	360742	blue	-0.783662	0.000197681	0.950132	5.44e-09	0.844328	2.02e-05	0.565967	0.0178745	0.674905	0.00295543	-0.428023	0.086532	-0.627083	0.00705474	-0.526688	0.0298446	0.293414	0.253034	0.0644758	0.805801	0.170133	0.513864	0.0109467	0.96674	0.370935	0.142701	-0.420589	0.0927496	-0.453766	0.0673209	0.187525	0.47108	-0.0491598	0.851375
ENSRNOG00000019970	mrpl11	293666	blue	0.78046	0.000218499	-0.756957	0.000434958	-0.710781	0.00138248	-0.64811	0.0048981	-0.538482	0.0257437	0.601586	0.010627	0.412711	0.0996828	0.466069	0.0593409	-0.319093	0.211887	-0.267491	0.299291	-0.0144327	0.956157	-0.219262	0.397808	-0.127827	0.624903	0.186876	0.472642	0.250489	0.332195	0.00840381	0.974463	-0.0508185	0.846415
ENSRNOG00000058271	Chpt1	362866	blue	0.775139	0.000257146	-0.776222	0.000248847	-0.805514	9.52e-05	-0.664081	0.00364565	-0.623135	0.00753365	0.353351	0.164134	0.402579	0.109134	0.513414	0.0350419	-0.413182	0.0992585	-0.214291	0.408858	-0.475251	0.0538603	-0.21088	0.416534	-0.0867815	0.740508	0.00363328	0.988958	0.0852065	0.745069	-0.017664	0.946353	0.129265	0.620982
ENSRNOG00000012579	Tlcd1	287472	blue	0.774865	0.00025928	-0.700786	0.00172673	-0.476821	0.0529625	-0.439008	0.0779027	-0.272057	0.290798	0.348441	0.170487	0.333225	0.191211	0.238056	0.357525	-0.00872008	0.973503	0.0550482	0.833793	-0.21245	0.412992	-0.0112434	0.965839	-0.16622	0.523733	0.230366	0.37372	0.0966434	0.712139	-0.242966	0.347395	-0.0893575	0.733066
ENSRNOG00000016891	Uimc1	290997	blue	0.774505	0.000262104	-0.771976	0.00028271	-0.813876	7.03e-05	-0.674804	0.00296135	-0.573997	0.0159755	0.461402	0.0622809	0.38981	0.121926	0.580253	0.0146088	-0.385247	0.126741	-0.252917	0.327372	-0.372602	0.140775	-0.232229	0.36976	-0.0573724	0.826873	0.107671	0.680836	0.188681	0.468299	-0.127224	0.626551	0.028249	0.914295
ENSRNOG00000020552	Fosl1	25445	blue	-0.774143	0.000264972	0.59371	0.0119815	0.423232	0.0905031	0.421967	0.0915741	0.191436	0.461706	-0.35236	0.165403	-0.282896	0.27123	-0.232359	0.369485	0.0145861	0.955691	0.0653292	0.803278	0.137023	0.599993	0.00865	0.973716	0.107569	0.681122	-0.22919	0.376232	-0.17406	0.504048	0.156072	0.549727	0.169767	0.514784
ENSRNOG00000019007	Rpl14	65043	blue	0.774041	0.000265786	-0.88408	2.5e-06	-0.76137	0.000384456	-0.412329	0.100029	-0.676704	0.00285179	0.262416	0.308901	0.763309	0.000363864	0.508132	0.0372917	-0.277907	0.280134	0.0283317	0.914045	-0.189145	0.467186	0.151056	0.562781	-0.524708	0.0305797	0.447628	0.0715851	0.34089	0.180573	-0.168033	0.51915	0.307106	0.230516
ENSRNOG00000012760	Chtop	361990	blue	-0.773042	0.000273866	0.727149	0.000941606	0.615907	0.00847782	0.363285	0.151775	0.601437	0.0106516	-0.297042	0.246938	-0.616213	0.00843604	-0.297501	0.246174	0.217043	0.402722	0.148515	0.569445	0.15673	0.548023	-0.147976	0.570861	0.524418	0.0306884	-0.324764	0.203423	-0.283606	0.269977	-0.0722037	0.783019	-0.169015	0.516675
ENSRNOG00000026679	Scn4b	315611	blue	-0.771092	0.000290222	0.818686	5.86e-05	0.654489	0.00436175	0.576879	0.0153339	0.36262	0.152582	-0.372127	0.141322	-0.252711	0.327779	-0.268494	0.297413	0.109516	0.675645	0.0754208	0.773583	0.380997	0.131345	0.0891392	0.733695	0.0942355	0.719034	-0.106849	0.683153	-0.136005	0.60273	0.0934428	0.721309	0.251046	0.331084
ENSRNOG00000018975	Atg9a	363254	blue	-0.770621	0.000294295	0.860543	9.31e-06	0.791342	0.000154412	0.478835	0.0518269	0.75335	0.000480239	-0.357802	0.158516	-0.74137	0.00065969	-0.526972	0.0297403	0.348231	0.170762	0.0633702	0.809073	0.0757259	0.77269	-0.0342531	0.896164	0.480352	0.0509836	-0.493709	0.043997	-0.492086	0.044805	0.173669	0.505022	-0.204055	0.432116
ENSRNOG00000054757	Adcy6	25289	blue	-0.770619	0.000294308	0.836696	2.83e-05	0.801419	0.000109931	0.643556	0.00531261	0.560722	0.0192075	-0.607806	0.00964604	-0.434808	0.0811243	-0.539364	0.0254555	0.31895	0.212103	0.293852	0.252293	0.0934897	0.721174	0.163225	0.531346	0.151039	0.562825	-0.208174	0.422676	-0.259563	0.314383	-0.0114794	0.965122	0.157549	0.545908
ENSRNOG00000001597	Atf2	81647	blue	-0.769778	0.000301696	0.786748	0.00017921	0.446391	0.0724677	0.214019	0.409468	0.313489	0.220472	-0.118007	0.651933	-0.47996	0.0512007	-0.0599298	0.819273	-0.138718	0.595446	-0.217507	0.401693	0.296656	0.247583	-0.35069	0.167557	0.549565	0.0223005	-0.342811	0.177971	-0.218069	0.400446	0.218794	0.398844	-0.0481379	0.854433
ENSRNOG00000018774	LOC100911847	29284	blue	0.764136	0.000355368	-0.858298	1.04e-05	-0.612731	0.0089215	-0.376209	0.136668	-0.373341	0.139926	0.468935	0.057588	0.55156	0.0217208	0.421185	0.0922402	0.00299552	0.990896	0.0798048	0.760773	-0.0344931	0.89544	0.167807	0.519722	-0.417591	0.0953464	0.461961	0.0619231	0.307236	0.23031	-0.363614	0.151377	0.00276601	0.991594
ENSRNOG00000018338	Vwa1	298683	blue	-0.76245	0.000372869	0.715597	0.00123807	0.594601	0.0118217	0.500639	0.0406705	0.49731	0.042244	-0.464482	0.0603289	-0.372117	0.141334	-0.2172	0.402373	0.189906	0.465363	0.263528	0.30678	0.0987616	0.70609	0.0411343	0.875444	0.27705	0.281681	-0.132477	0.612257	-0.205153	0.42959	-0.215015	0.40724	0.139889	0.592311
ENSRNOG00000028557	Hibch	301384	blue	0.762344	0.000374	-0.769112	0.000307659	-0.597628	0.0112916	-0.465094	0.0599464	-0.422696	0.0909557	0.374084	0.139077	0.445881	0.0728335	0.392139	0.119518	-0.116963	0.654835	0.0713804	0.785439	-0.171304	0.510929	-0.0280356	0.91494	-0.219041	0.398296	0.269143	0.296202	0.181783	0.485007	-0.324193	0.204265	0.0469147	0.858096
ENSRNOG00000013581	Extl3	56819	blue	-0.761005	0.000388446	0.946004	9.75e-09	0.835986	2.92e-05	0.612323	0.00897983	0.572059	0.0164185	-0.403135	0.108599	-0.414935	0.0976896	-0.445803	0.0728898	0.240213	0.353054	0.0876512	0.737993	0.382281	0.129941	0.0639025	0.807497	0.212118	0.413738	-0.162238	0.533865	-0.260259	0.31304	0.113089	0.665629	0.0908624	0.728728
ENSRNOG00000016530	Nsa2	171456	blue	0.760831	0.000390349	-0.724789	0.000996835	-0.615885	0.00848084	-0.475756	0.0535701	-0.395968	0.115632	0.167288	0.521033	0.395113	0.116492	0.326236	0.201264	-0.193941	0.455754	-0.0847923	0.74627	-0.616517	0.00839468	0.0458927	0.861159	-0.190166	0.464739	-0.0229071	0.930461	-0.158606	0.543182	0.0905591	0.729602	0.164883	0.527127
ENSRNOG00000015441	Il4r	25084	blue	-0.759461	0.000405664	0.88271	2.72e-06	0.822599	5.04e-05	0.490986	0.0453592	0.776831	0.000244283	-0.362479	0.152753	-0.762855	0.000368603	-0.559768	0.0194579	0.376374	0.136482	0.066281	0.800465	0.100671	0.700651	-0.0243457	0.926105	0.481741	0.0502207	-0.487992	0.0468927	-0.469027	0.0575322	0.154797	0.553032	-0.266842	0.300509
ENSRNOG00000029667	Tbce	361255	blue	0.759066	0.000410173	-0.687481	0.00229116	-0.791615	0.000153034	-0.718491	0.00115742	-0.596221	0.0115356	0.40269	0.109027	0.403376	0.108369	0.628366	0.00690441	-0.507302	0.0376554	-0.27847	0.279122	-0.404632	0.10717	-0.336746	0.186275	0.0540508	0.836766	0.00381856	0.988395	0.0315116	0.904437	-0.0249711	0.924211	0.193051	0.457864
ENSRNOG00000016961	Rps27	94266	blue	0.758382	0.000418088	-0.759716	0.000402776	-0.714565	0.00126792	-0.571922	0.0164502	-0.606416	0.00985868	0.523776	0.0309305	0.60531	0.0100307	0.536936	0.0262548	-0.348197	0.170806	-0.21435	0.408727	0.0629892	0.810201	-0.0930877	0.722328	-0.280645	0.275226	0.382503	0.1297	0.405244	0.106589	-0.0252022	0.923512	0.0794863	0.761702
ENSRNOG00000017373	Rhobtb2	306004	blue	-0.755766	0.000449504	0.86194	8.67e-06	0.681001	0.00261622	0.307784	0.229437	0.636078	0.00605437	-0.281317	0.274029	-0.797371	0.000126289	-0.449589	0.0702016	0.169037	0.516621	-0.121835	0.641348	0.0203179	0.938306	-0.23251	0.369164	0.639331	0.00572217	-0.6103	0.00927344	-0.483737	0.0491394	0.332536	0.192186	-0.302957	0.2372
ENSRNOG00000012684	Bloc1s2	293938	blue	0.755733	0.000449908	-0.891808	1.52e-06	-0.724877	0.000994717	-0.529562	0.0288018	-0.471818	0.0558635	0.289098	0.260406	0.404043	0.10773	0.375302	0.137692	-0.153142	0.557336	0.0582852	0.824159	-0.434276	0.0815394	-0.00310273	0.990571	-0.220262	0.395607	0.136111	0.602444	0.130725	0.61701	-0.208113	0.422815	0.0396866	0.879797
ENSRNOG00000012007	Slc38a7	291840	blue	-0.753013	0.000484653	0.661009	0.00386378	0.775531	0.000254112	0.588909	0.0128719	0.784779	0.000190821	-0.379371	0.133136	-0.607727	0.00965799	-0.551788	0.0216553	0.567678	0.0174557	0.414345	0.098216	0.274383	0.286531	0.14835	0.569878	0.273096	0.288888	-0.0610189	0.816041	-0.0668048	0.798919	-0.312553	0.221926	-0.308028	0.229049
ENSRNOG00000010536	Nr2c2	50659	blue	-0.751929	0.000499111	0.824171	4.74e-05	0.880429	3.12e-06	0.822894	4.98e-05	0.613704	0.00878368	-0.737799	0.000722831	-0.332166	0.192712	-0.622084	0.00766544	0.431935	0.083383	0.429834	0.0850635	0.133301	0.610027	0.370889	0.142755	-0.0240865	0.926889	-0.130479	0.617678	-0.336208	0.187023	-0.00993594	0.96981	0.248597	0.33598
ENSRNOG00000057881	Sppl2b	362828	blue	-0.749432	0.000533787	0.910673	3.83e-07	0.770665	0.000293909	0.553036	0.0212994	0.458659	0.0640576	-0.441953	0.0757003	-0.430997	0.0841304	-0.471318	0.0561598	0.164812	0.527306	0.0672877	0.797493	0.313827	0.219946	0.0118115	0.964114	0.216177	0.404648	-0.241594	0.350208	-0.207252	0.42478	0.168848	0.517096	0.0878773	0.737339
ENSRNOG00000000853	Aif1	29427	blue	0.747955	0.00055523	-0.819463	5.69e-05	-0.569448	0.0170307	-0.444366	0.0739296	-0.220238	0.39566	0.363598	0.151397	0.324797	0.203374	0.322046	0.207452	0.0618906	0.813456	0.115824	0.658	-0.277882	0.280179	0.0804564	0.758874	-0.189928	0.465309	0.288734	0.261034	0.225359	0.38448	-0.394634	0.116976	-0.157621	0.545721
ENSRNOG00000016912	Btf3	294680	blue	0.746307	0.000579981	-0.754947	0.000459733	-0.756627	0.000438944	-0.736355	0.000749746	-0.506958	0.0378066	0.508993	0.0369178	0.373673	0.139547	0.554529	0.0208799	-0.385783	0.126169	-0.241652	0.350089	-0.248748	0.335676	-0.305002	0.233891	0.0391135	0.881521	0.132909	0.611087	0.162303	0.5337	-0.0412461	0.875107	-0.0444205	0.865575
ENSRNOG00000019974	Uba52	64156	blue	0.74359	0.000622793	-0.814959	6.75e-05	-0.528377	0.0292282	-0.393587	0.118038	-0.269467	0.295598	0.351382	0.166662	0.413839	0.0986684	0.255421	0.322441	0.0589913	0.82206	0.137423	0.598919	-0.143724	0.582097	0.124252	0.634695	-0.305088	0.233753	0.378028	0.134628	0.260781	0.312034	-0.314841	0.21838	-0.101966	0.696971
ENSRNOG00000052071	Olr851	298040	blue	-0.740432	0.000675813	0.746749	0.000573247	0.714162	0.00127973	0.579785	0.0147079	0.449215	0.0704634	-0.36857	0.145465	-0.399432	0.112194	-0.542034	0.0245981	0.291064	0.257032	0.12666	0.628092	0.390283	0.121435	0.125442	0.63143	0.0620263	0.813054	-0.0541303	0.836529	0.0109719	0.966663	0.102489	0.695487	-0.112688	0.666752
ENSRNOG00000012100	Ssbp1	54304	blue	0.737123	0.000735334	-0.922914	1.32e-07	-0.84841	1.68e-05	-0.666933	0.00345228	-0.556109	0.0204427	0.46421	0.0604993	0.3855	0.126472	0.511408	0.0358838	-0.279281	0.277664	-0.114269	0.662335	-0.364377	0.150457	-0.155082	0.552292	-0.123924	0.635595	0.156815	0.547804	0.248475	0.336224	-0.162609	0.532918	-0.0703184	0.788562
ENSRNOG00000016539	Rab24	252915	blue	0.736641	0.000744361	-0.82687	4.25e-05	-0.798456	0.000121719	-0.699442	0.00177795	-0.590127	0.0126412	0.399012	0.112608	0.318867	0.212228	0.436346	0.0799334	-0.355414	0.161513	-0.141483	0.588059	-0.375696	0.137246	-0.2712	0.292381	-0.0342431	0.896194	0.0392896	0.880991	0.178059	0.494144	-0.0900714	0.731007	-0.0543277	0.83594
ENSRNOG00000033741	Ankrd34a	295283	blue	-0.735827	0.000759791	0.772582	0.000277651	0.890567	1.65e-06	0.635355	0.00613033	0.877237	3.76e-06	-0.501671	0.0401919	-0.698869	0.00180014	-0.688646	0.00223642	0.600634	0.010784	0.325555	0.20226	-0.0135648	0.958791	0.21781	0.401019	0.301225	0.240027	-0.368339	0.145738	-0.477132	0.0527855	0.0105753	0.967868	-0.213592	0.410425
ENSRNOG00000002860	Ccdc181	360867	blue	0.735826	0.000759826	-0.83795	2.68e-05	-0.715351	0.00124512	-0.485392	0.0482561	-0.536881	0.0262731	0.344209	0.176092	0.510747	0.0361646	0.445796	0.0728953	-0.17918	0.491385	0.0475209	0.856281	-0.216127	0.404758	-0.0122537	0.962771	-0.299709	0.242517	0.425127	0.0889171	0.450299	0.0697058	-0.406191	0.105695	0.0142834	0.95661
ENSRNOG00000057092	Slfn4	114247	blue	-0.733587	0.00080367	0.799046	0.00011929	0.587413	0.0131599	0.502027	0.0400276	0.207258	0.424766	-0.483621	0.0492019	-0.185044	0.477073	-0.296709	0.247495	-0.0551364	0.83353	0.0469977	0.857848	0.334694	0.189141	-0.00743603	0.977403	0.106739	0.683462	-0.104518	0.689737	-0.1054	0.687243	0.23715	0.359412	0.303255	0.236716
ENSRNOG00000051986	Plcg2	29337	blue	0.733341	0.000808619	-0.629505	0.0067732	-0.584829	0.013669	-0.389681	0.122061	-0.558388	0.0198248	0.275462	0.284563	0.639065	0.00574873	0.469798	0.0570674	-0.28084	0.274878	-0.0490176	0.8518	-0.0726323	0.78176	0.0519489	0.843038	-0.388794	0.122986	0.363201	0.151877	0.321623	0.208084	-0.208214	0.422584	0.341469	0.179785
ENSRNOG00000031129	Carm1	363026	blue	-0.731155	0.000853668	0.761985	0.000377821	0.800421	0.000113788	0.489905	0.0459086	0.819484	5.69e-05	-0.366172	0.148306	-0.731426	0.000847962	-0.556333	0.0203815	0.478961	0.0517565	0.242546	0.348255	0.0801059	0.759895	0.0250499	0.923973	0.449236	0.0704492	-0.36296	0.152169	-0.386204	0.125721	-0.0576409	0.826075	-0.270341	0.293974
ENSRNOG00000014481	Adtrp	361228	blue	0.730088	0.000876404	-0.688383	0.00224869	-0.578039	0.0150816	-0.563978	0.0183712	-0.304423	0.234825	0.449666	0.0701475	0.21473	0.407876	0.336634	0.18643	-0.122361	0.639896	-0.0932335	0.72191	-0.19399	0.455639	-0.199144	0.443514	0.0250948	0.923837	0.181488	0.485727	0.197738	0.446804	-0.243112	0.347095	-0.292015	0.25541
ENSRNOG00000016326	Cx3cl1	89808	blue	-0.729562	0.000887784	0.824048	4.76e-05	0.582666	0.0141071	0.32178	0.207848	0.344724	0.175403	-0.120463	0.645134	-0.495147	0.0432903	-0.274008	0.287215	0.00178776	0.994567	-0.170787	0.512223	0.424727	0.0892504	-0.243023	0.347278	0.396953	0.114647	-0.31775	0.213923	-0.184841	0.477566	0.253386	0.326444	-0.104238	0.690529
ENSRNOG00000011019	Faahl	29347	blue	-0.729112	0.000897615	0.828571	3.97e-05	0.769407	0.000305002	0.542343	0.0245003	0.519673	0.0325116	-0.287616	0.262968	-0.466858	0.0588548	-0.509068	0.0368854	0.281113	0.274393	0.093724	0.720502	0.484183	0.0489006	0.0113514	0.965511	0.197698	0.446898	-0.0898046	0.731776	-0.049111	0.851521	0.0540656	0.836722	-0.129096	0.621442
ENSRNOG00000038951	Cox17	89786	blue	0.727744	0.000928081	-0.883764	2.55e-06	-0.784274	0.000193897	-0.629256	0.00680168	-0.469426	0.0572913	0.412802	0.0996013	0.362422	0.152822	0.469604	0.0571842	-0.238958	0.355652	-0.116191	0.65698	-0.426507	0.0877745	-0.0931835	0.722053	-0.111378	0.670419	0.0557223	0.831785	0.0693456	0.791426	-0.0376616	0.885891	-0.0389007	0.882161
ENSRNOG00000036934	Abhd12	499913	blue	-0.727672	0.000929712	0.649536	0.0047738	0.602168	0.010532	0.519398	0.0326197	0.580065	0.0146486	-0.40348	0.108269	-0.372614	0.140761	-0.23167	0.370946	0.289177	0.26027	0.270373	0.293914	0.0897629	0.731896	0.124212	0.634804	0.248291	0.336595	-0.122635	0.63914	-0.254943	0.32338	-0.161484	0.535795	0.104247	0.690505
ENSRNOG00000000340	Rtraf	302247	blue	0.72621	0.000963264	-0.756136	0.000444937	-0.656359	0.0042139	-0.495614	0.0430627	-0.531347	0.0281685	0.317806	0.213839	0.537308	0.026131	0.47712	0.0527924	-0.245935	0.341349	0.0417112	0.87371	-0.2523	0.328593	-0.0541134	0.836579	-0.250022	0.333126	0.275898	0.283769	0.188986	0.467567	-0.287666	0.262882	0.255794	0.321711
ENSRNOG00000049536	Rpl35al1	57809	blue	0.726169	0.000964212	-0.773512	0.00027004	-0.769532	0.000303886	-0.774233	0.00026426	-0.47604	0.0534077	0.643211	0.0053452	0.192094	0.46014	0.472852	0.0552544	-0.321484	0.208292	-0.365597	0.148992	-0.279283	0.277662	-0.337637	0.185038	0.0953224	0.715919	-0.0558119	0.831518	0.117541	0.653229	0.0886901	0.734992	-0.272005	0.290896
ENSRNOG00000014302	Dlgap3	286923	blue	-0.725623	0.000977017	0.872712	4.87e-06	0.844321	2.02e-05	0.593418	0.0120343	0.71677	0.00120483	-0.301251	0.239984	-0.539187	0.0255131	-0.500523	0.0407247	0.394711	0.116898	0.106401	0.684416	0.394962	0.116645	0.101796	0.697454	0.25076	0.331654	-0.182153	0.484103	-0.253158	0.326894	0.0389108	0.882131	-0.147102	0.573163
ENSRNOG00000026716	Rpl9	29257	blue	0.72383	0.00102002	-0.855476	1.2e-05	-0.719776	0.00112304	-0.587217	0.013198	-0.474363	0.0543731	0.460681	0.0627443	0.41913	0.0940067	0.449982	0.0699267	-0.200949	0.439306	-0.0572809	0.827146	-0.195042	0.45315	-0.0894379	0.732834	-0.162167	0.534047	0.222349	0.39103	0.218075	0.400434	-0.148311	0.569979	-0.0995668	0.703796
ENSRNOG00000008956	Cdkn2c	54238	blue	0.723149	0.00103676	-0.71445	0.00127127	-0.673196	0.00305667	-0.455555	0.0661135	-0.711525	0.00135931	0.424535	0.0894104	0.620191	0.00790751	0.398568	0.113045	-0.342843	0.177928	-0.188434	0.468894	0.0593088	0.821117	-0.0360065	0.890877	-0.436774	0.0796047	0.373934	0.139248	0.40762	0.104355	-0.00830208	0.974772	0.111287	0.670675
ENSRNOG00000013412	Creb1	81646	blue	-0.723064	0.00103886	0.697533	0.00185284	0.729466	0.000889866	0.789185	0.000165675	0.427189	0.0872136	-0.653645	0.0044299	-0.171237	0.511097	-0.47725	0.0527187	0.338159	0.184318	0.40123	0.110439	0.161709	0.535217	0.406126	0.105756	-0.168629	0.517647	-0.0757963	0.772484	-0.272666	0.289677	-0.0117073	0.96443	0.386486	0.125421
ENSRNOG00000012772	Nqo1	24314	blue	0.722839	0.00104444	-0.777032	0.000242785	-0.675723	0.00290792	-0.52112	0.0319471	-0.502214	0.0399419	0.661821	0.00380512	0.543549	0.0241218	0.553427	0.0211891	-0.197457	0.447463	-0.109885	0.674607	0.269197	0.296102	-0.0977589	0.708952	-0.270275	0.294096	0.568304	0.0173046	0.582045	0.014235	-0.370768	0.142896	-0.125084	0.63241
ENSRNOG00000011352	Furin	54281	blue	-0.722726	0.00104726	0.931107	5.8e-08	0.823286	4.9e-05	0.525829	0.030162	0.620351	0.00788682	-0.453146	0.0677429	-0.549251	0.0223929	-0.514084	0.0347641	0.242777	0.347781	0.0830521	0.751321	0.184411	0.478608	-0.0215795	0.934483	0.350035	0.168406	-0.310874	0.224553	-0.366602	0.147793	0.144438	0.580205	0.000138596	0.999579
ENSRNOG00000018494	Ppp1r3c	309513	blue	0.721402	0.00108072	-0.669901	0.00325995	-0.608757	0.00950259	-0.574706	0.0158156	-0.352409	0.165341	0.36694	0.147392	0.180638	0.487808	0.313462	0.220513	-0.181701	0.485206	-0.135467	0.604179	-0.289868	0.259082	-0.202419	0.435895	0.0317936	0.903586	0.0644374	0.805915	0.179359	0.490946	-0.160224	0.539023	-0.272086	0.290746
ENSRNOG00000024437	Blcap	171113	blue	-0.720119	0.001114	0.748054	0.000553762	0.644002	0.00527084	0.359319	0.156631	0.596104	0.0115561	-0.212152	0.413662	-0.551181	0.0218299	-0.310682	0.224854	0.221036	0.393906	0.0782608	0.765278	0.307522	0.229853	-0.134121	0.607811	0.445947	0.072786	-0.181394	0.485957	-0.166897	0.522021	-0.0584424	0.823692	-0.197853	0.446534
ENSRNOG00000011542	Apopt1	299341	blue	0.71865	0.00115313	-0.860012	9.56e-06	-0.678337	0.00276029	-0.5382	0.0258362	-0.4378	0.07882	0.365981	0.148534	0.363607	0.151386	0.288016	0.262274	-0.12687	0.627519	-0.0550493	0.83379	-0.341372	0.179918	-0.00355359	0.9892	-0.227314	0.380259	0.163239	0.531311	0.205894	0.427889	-0.0170023	0.94836	-0.088083	0.736745
ENSRNOG00000042786	Vti1a	65277	blue	-0.718614	0.00115409	0.620934	0.00781172	0.590196	0.0126283	0.47981	0.0512836	0.363273	0.151789	-0.444858	0.0735729	-0.344886	0.175187	-0.444709	0.0736805	0.192166	0.459968	0.262971	0.307841	0.268791	0.296858	0.0272243	0.917394	0.143461	0.582797	-0.0579025	0.825297	-0.0380949	0.884587	-0.00820659	0.975063	0.00166259	0.994947
ENSRNOG00000048718	Ccdc71	498678	blue	-0.717035	0.00119744	0.769881	0.000300788	0.702231	0.00167302	0.498959	0.0414589	0.615817	0.00849012	-0.237279	0.359142	-0.574578	0.0158446	-0.391901	0.119763	0.336366	0.186803	0.086253	0.742038	0.185868	0.475078	0.0231389	0.929759	0.303265	0.2367	-0.311511	0.223554	-0.348589	0.170292	-0.0228789	0.930546	-0.118201	0.651396
ENSRNOG00000059659	Zfand3	361816	blue	-0.715808	0.00123204	0.913293	3.09e-07	0.778314	0.000233454	0.529982	0.0286519	0.498566	0.0416448	-0.389303	0.122455	-0.477674	0.0524794	-0.494088	0.0438098	0.195381	0.45235	0.0174235	0.947082	0.306189	0.231984	-0.000898705	0.997269	0.236101	0.361603	-0.248489	0.336198	-0.208157	0.422715	0.173229	0.506119	0.00348082	0.989422
ENSRNOG00000048016	LOC102556337	301563	blue	0.714563	0.00126797	-0.797888	0.000124091	-0.703809	0.0016159	-0.409815	0.102322	-0.664176	0.00363913	0.0941558	0.719263	0.637967	0.00585958	0.412293	0.100061	-0.287299	0.263518	0.113493	0.6645	-0.402288	0.109414	0.0747471	0.775557	-0.418002	0.0949872	0.294786	0.250717	0.254722	0.323814	-0.238343	0.356928	0.368145	0.145967
ENSRNOG00000028430	LOC257650	257650	blue	0.713618	0.00129584	-0.60953	0.00938719	-0.668403	0.00335585	-0.511118	0.036007	-0.676248	0.00287777	0.280143	0.276123	0.489976	0.0458724	0.373986	0.139189	-0.452999	0.0678432	-0.2759	0.283766	-0.19608	0.450702	-0.177902	0.494532	-0.218769	0.398898	0.171489	0.510467	0.227444	0.379979	0.143338	0.583122	0.165715	0.525014
ENSRNOG00000025562	Ang2	497229	blue	0.711974	0.00134548	-0.756153	0.000444731	-0.547887	0.0227975	-0.308645	0.228069	-0.434959	0.081007	0.195631	0.451761	0.560393	0.0192935	0.279807	0.276723	-0.0938992	0.719999	0.0575091	0.826467	-0.305579	0.232963	0.221545	0.392789	-0.457329	0.0649327	0.193369	0.457109	-0.0188051	0.942892	0.000594108	0.998194	0.264101	0.305691
ENSRNOG00000020527	Drap1	293674	blue	0.711778	0.0013515	-0.824333	4.71e-05	-0.529768	0.0287281	-0.30197	0.238808	-0.35874	0.157348	0.355789	0.16104	0.520849	0.0320523	0.287994	0.262313	0.0720796	0.783384	0.204347	0.431443	-0.0276111	0.916224	0.221197	0.393552	-0.472927	0.0552101	0.455775	0.0659663	0.363248	0.15182	-0.419908	0.0933347	0.0317196	0.903809
ENSRNOG00000005437	Rida	65151	blue	0.711387	0.00136361	-0.682619	0.00253171	-0.603031	0.0103924	-0.671209	0.00317798	-0.318729	0.212438	0.731751	0.000841175	0.176385	0.49828	0.41493	0.0976941	-0.160893	0.537308	-0.231642	0.371006	0.11549	0.658932	-0.330147	0.195597	0.0852361	0.744984	0.219472	0.397345	0.355026	0.162005	-0.233003	0.368121	-0.404175	0.107605
ENSRNOG00000017647	Zc3h8	311414	blue	0.710264	0.00139878	-0.73854	0.000709336	-0.604675	0.0101304	-0.645368	0.00514441	-0.238141	0.357347	0.481492	0.0503568	0.017092	0.948088	0.244806	0.343641	-0.0624334	0.811847	-0.137586	0.598481	-0.3618	0.153581	-0.218382	0.399753	0.113048	0.665744	-0.0768646	0.769358	0.104547	0.689657	-0.134805	0.605963	-0.429005	0.0857336
ENSRNOG00000009506	Mre11a	64046	blue	-0.709604	0.00141984	0.843723	2.08e-05	0.807885	8.75e-05	0.698601	0.00181062	0.523045	0.0312077	-0.661635	0.00381846	-0.351897	0.165998	-0.52028	0.0322738	0.299771	0.242416	0.325249	0.20271	0.0778359	0.766519	0.198893	0.4441	0.0927952	0.723169	-0.187511	0.471114	-0.367861	0.146301	-0.0309495	0.906134	0.252772	0.327659
ENSRNOG00000011782	Got2	25721	blue	-0.709235	0.00143168	0.844998	1.96e-05	0.715432	0.0012428	0.434447	0.0814056	0.554753	0.0208175	-0.379389	0.133116	-0.540861	0.024972	-0.416751	0.0960829	0.201513	0.437997	0.0891333	0.733713	0.228904	0.376846	-0.0922602	0.724706	0.393744	0.117879	-0.21855	0.399382	-0.152681	0.558536	-0.00141102	0.995712	-0.1073	0.681881
ENSRNOG00000017660	Inpp4a	80849	blue	-0.708313	0.00146172	0.712168	0.00133955	0.670133	0.00324523	0.460075	0.0631358	0.625476	0.00724668	-0.41236	0.1	-0.502702	0.0397182	-0.363928	0.150997	0.289085	0.260429	0.268896	0.296662	0.161834	0.534898	-0.0202082	0.938639	0.383058	0.129098	-0.15002	0.565493	-0.220733	0.39457	-0.165645	0.525192	-0.0742028	0.777152
ENSRNOG00000015235	Fra10ac1	365458	blue	0.707524	0.00148781	-0.792603	0.000148132	-0.61555	0.00852674	-0.475303	0.0538303	-0.336886	0.18608	0.229219	0.376171	0.246904	0.339388	0.235377	0.363122	-0.0620074	0.81311	0.0438807	0.867194	-0.521353	0.0318568	-0.000607463	0.998154	-0.144792	0.579267	0.0403478	0.877808	0.0550925	0.833661	-0.1633	0.531155	-0.0559107	0.831224
ENSRNOG00000012550	Uqcrh	366448	blue	0.704503	0.00159131	-0.721386	0.00108115	-0.757029	0.000434099	-0.771163	0.000289612	-0.483655	0.0491836	0.81333	7.17e-05	0.280104	0.276192	0.589399	0.0127787	-0.363451	0.151574	-0.43944	0.0775767	0.0979905	0.70829	-0.38034	0.132066	0.0763174	0.770959	0.164047	0.529251	0.332794	0.191821	0.00902627	0.972573	-0.330302	0.195374
ENSRNOG00000016280	Btrc	361765	blue	-0.702402	0.00166675	0.867041	6.64e-06	0.529512	0.02882	0.246668	0.339866	0.359921	0.155887	-0.167894	0.519502	-0.548556	0.0225984	-0.194484	0.454468	-0.0977616	0.708944	-0.264656	0.304636	0.244843	0.343565	-0.342482	0.178414	0.5439	0.0240125	-0.402204	0.109496	-0.254313	0.324617	0.279937	0.276491	-0.0603668	0.817976
ENSRNOG00000037627	Trappc1	287427	blue	0.700648	0.00173192	-0.798186	0.000122844	-0.638846	0.00577073	-0.38699	0.124886	-0.514791	0.0344726	0.457385	0.0648958	0.644269	0.00524599	0.464824	0.0601151	-0.135855	0.603134	0.0112752	0.965742	0.102264	0.696125	0.108766	0.677754	-0.461337	0.0623226	0.584464	0.0137422	0.552697	0.0213957	-0.320026	0.210479	0.109962	0.67439
ENSRNOG00000037897	Rps19	29287	blue	0.699791	0.00176454	-0.811569	7.65e-05	-0.795399	0.000134971	-0.66655	0.00347771	-0.660179	0.00392446	0.562347	0.0187865	0.492837	0.0444301	0.524141	0.0307927	-0.405698	0.10616	-0.262902	0.307972	-0.0459709	0.860925	-0.215063	0.407133	-0.178383	0.493347	0.234347	0.365286	0.317028	0.215024	0.053082	0.839656	-0.0374187	0.886623
ENSRNOG00000014453	Anxa5	25673	blue	0.699699	0.00176805	-0.459534	0.0634869	-0.589756	0.0127112	-0.753547	0.00047767	-0.472606	0.0553986	0.614996	0.00860326	0.217533	0.401633	0.443078	0.074871	-0.47997	0.0511952	-0.527669	0.0294856	0.0382311	0.884177	-0.503463	0.039371	0.206185	0.42722	0.0470274	0.857759	0.231165	0.372019	0.218246	0.400055	-0.216222	0.404547
ENSRNOG00000029549	Eci3	291075	blue	0.698361	0.00182005	-0.916552	2.34e-07	-0.841857	2.26e-05	-0.557806	0.0199815	-0.639045	0.00575073	0.423648	0.0901538	0.535569	0.0267132	0.561598	0.0189795	-0.280792	0.274963	-0.0242344	0.926441	-0.176281	0.498537	-0.051918	0.843131	-0.284715	0.268027	0.352029	0.165828	0.468409	0.0579067	-0.308093	0.228945	0.0168532	0.948812
ENSRNOG00000010218	NEWGENE_619861	56783	blue	0.696903	0.00187813	-0.851426	1.46e-05	-0.819742	5.63e-05	-0.67658	0.00285885	-0.529165	0.0289441	0.34405	0.176304	0.282476	0.271973	0.463001	0.0612615	-0.309506	0.226706	-0.102132	0.6965	-0.488605	0.0465758	-0.224561	0.38621	0.00106637	0.996759	0.0474605	0.856461	0.197199	0.448069	-0.155297	0.551735	-0.11695	0.654871
ENSRNOG00000016221	Scn2b	25349	blue	-0.696706	0.00188608	0.96024	1.02e-09	0.852665	1.37e-05	0.578024	0.0150848	0.602834	0.0104241	-0.504299	0.0389925	-0.543076	0.0242697	-0.550796	0.0219415	0.254292	0.32466	0.0805966	0.758465	0.145194	0.578203	0.0328645	0.900353	0.305618	0.2329	-0.389191	0.122572	-0.439104	0.0778307	0.200232	0.440975	0.0474101	0.856612
ENSRNOG00000000967	Aacs	65984	blue	-0.696498	0.0018945	0.679009	0.00272338	0.669608	0.00327853	0.396187	0.115413	0.645808	0.00510424	-0.106169	0.68507	-0.650241	0.00471335	-0.437443	0.0790921	0.375511	0.137456	0.0449927	0.863858	0.236954	0.359822	-0.0331025	0.899635	0.366181	0.148295	-0.34119	0.180166	-0.325662	0.202104	0.0722934	0.782756	-0.324945	0.203156
ENSRNOG00000020644	Nsg2	497878	blue	-0.694701	0.00196869	0.829947	3.75e-05	0.73501	0.000775577	0.457864	0.0645801	0.707095	0.00150216	-0.246175	0.340862	-0.576954	0.0153176	-0.36577	0.148785	0.306103	0.232121	0.0223741	0.932075	0.266425	0.301295	-0.0221049	0.932891	0.411755	0.100549	-0.214435	0.408536	-0.254367	0.324511	0.0254568	0.922741	-0.204876	0.430226
ENSRNOG00000002991	Srr	303306	blue	-0.693856	0.0020044	0.704114	0.00160509	0.783452	0.000198988	0.556534	0.0203264	0.792222	0.000150006	-0.403968	0.107802	-0.639546	0.00570068	-0.530148	0.0285927	0.523537	0.0310208	0.370305	0.143434	0.153538	0.556303	0.0924928	0.724037	0.359703	0.156156	-0.195471	0.452138	-0.257002	0.31935	-0.256541	0.320251	-0.256401	0.320525
ENSRNOG00000028426	Mcf2l	117020	blue	-0.691542	0.00210489	0.786254	0.000182066	0.751594	0.000503658	0.498283	0.0417793	0.760497	0.00039404	-0.414246	0.098304	-0.698481	0.00181532	-0.530645	0.0284163	0.383883	0.128206	0.101464	0.698397	-0.0289336	0.912226	0.0300271	0.908921	0.441069	0.0763565	-0.427519	0.0869436	-0.488273	0.0467475	0.142733	0.584731	-0.229211	0.376188
ENSRNOG00000001237	Cabin1	94165	blue	-0.689891	0.00217908	0.899283	9.11e-07	0.818601	5.88e-05	0.599026	0.0110532	0.616641	0.00837783	-0.354583	0.162566	-0.450975	0.0692357	-0.474651	0.0542064	0.296856	0.247249	0.0546777	0.834897	0.353691	0.1637	0.0899062	0.731483	0.200227	0.440987	-0.162532	0.533115	-0.278411	0.279226	0.108418	0.678731	-0.0220638	0.933015
ENSRNOG00000061139	Taf1a	360893	blue	-0.689787	0.0021838	0.581717	0.0143029	0.577815	0.01513	0.518233	0.0330809	0.499773	0.0410756	-0.475734	0.0535831	-0.485116	0.0484026	-0.422929	0.0907587	0.343428	0.17714	0.357056	0.159448	0.015229	0.95374	0.09331	0.72169	0.207755	0.423631	-0.166444	0.523166	-0.129893	0.619271	-0.267435	0.299397	-0.0629642	0.810275
ENSRNOG00000001960	Sult1d1	60393	blue	0.6896	0.00219234	-0.644532	0.00522154	-0.661322	0.00384111	-0.751466	0.000505402	-0.323071	0.205927	0.709855	0.00141181	0.132417	0.612419	0.549363	0.0223601	-0.271552	0.291731	-0.280087	0.276222	-0.0393205	0.880898	-0.452807	0.0679741	0.254319	0.324606	0.10961	0.67538	0.220152	0.395849	-0.262913	0.307952	-0.357905	0.158387
ENSRNOG00000018179	Glt8d1	306253	blue	0.689031	0.00221852	-0.701618	0.00169563	-0.61278	0.00891451	-0.491538	0.0450806	-0.448774	0.0707743	0.285463	0.266717	0.298769	0.24407	0.259276	0.314937	-0.199701	0.442214	-0.0548149	0.834488	-0.232567	0.369044	-0.133989	0.608166	-0.129969	0.619066	0.176793	0.497271	0.261517	0.310621	-0.141894	0.586964	-0.0893262	0.733156
ENSRNOG00000003365	Cadm3	360882	blue	-0.687789	0.00227659	0.86896	5.99e-06	0.870227	5.59e-06	0.546757	0.023137	0.773391	0.000271024	-0.431889	0.0834197	-0.697368	0.00185942	-0.631259	0.00657506	0.435272	0.0807639	0.150954	0.563048	0.0427151	0.870694	0.0558213	0.83149	0.37963	0.132849	-0.437522	0.0790318	-0.498981	0.0414485	0.116435	0.656302	-0.155644	0.550833
ENSRNOG00000019383	Tef	29362	blue	-0.687285	0.00230049	0.880408	3.12e-06	0.787537	0.00017473	0.486479	0.0476829	0.649181	0.0048045	-0.208769	0.421321	-0.628462	0.00689329	-0.484882	0.0485269	0.304609	0.234525	-0.028904	0.912315	0.372857	0.140482	-0.0622345	0.812437	0.384642	0.12739	-0.300932	0.240506	-0.275271	0.28491	0.141335	0.588453	-0.246823	0.339553
ENSRNOG00000003442	Adora1	29290	blue	-0.685054	0.00240879	0.981598	3.37e-12	0.837419	2.74e-05	0.575134	0.0157199	0.558498	0.0197955	-0.442572	0.0752435	-0.452011	0.0685204	-0.46352	0.0609334	0.194994	0.453262	0.0277481	0.91581	0.243534	0.346232	0.0197729	0.939958	0.266995	0.300221	-0.302048	0.238681	-0.409631	0.102492	0.19457	0.454265	0.134599	0.606519
ENSRNOG00000006934	Acvr1b	29381	blue	-0.684782	0.0024223	0.897416	1.04e-06	0.702747	0.00165417	0.364985	0.149725	0.507469	0.0375821	-0.281941	0.27292	-0.602921	0.0104102	-0.42032	0.0929812	0.105732	0.686304	-0.0908629	0.728727	0.219798	0.396629	-0.20275	0.43513	0.461306	0.0623424	-0.416143	0.0966188	-0.332995	0.191536	0.234081	0.365846	-0.0621078	0.812812
ENSRNOG00000019848	Rbm39	362251	blue	0.684231	0.00244979	-0.744299	0.000611373	-0.633134	0.00636833	-0.431605	0.0836456	-0.593103	0.0120913	0.226476	0.382066	0.486774	0.0475278	0.257922	0.317561	-0.258369	0.316693	-0.0392578	0.881087	-0.185879	0.475051	0.00871525	0.973517	-0.353517	0.163922	0.16918	0.51626	0.223986	0.387462	0.0467081	0.858715	0.150554	0.564093
ENSRNOG00000017828	Egr3	25148	blue	-0.683795	0.00247172	0.929882	6.6e-08	0.829315	3.85e-05	0.496026	0.0428628	0.615691	0.00850737	-0.426199	0.088029	-0.658215	0.00407118	-0.634777	0.00619152	0.254767	0.323726	-0.0236556	0.928194	0.11246	0.667391	-0.0447221	0.86467	0.376021	0.136879	-0.491162	0.04527	-0.468876	0.0576233	0.361561	0.153873	-0.105417	0.687197
ENSRNOG00000011119	Spin1	361217	blue	-0.683508	0.00248628	0.925515	1.02e-07	0.634913	0.00617706	0.301983	0.238786	0.463042	0.0612359	-0.213615	0.410373	-0.618755	0.00809509	-0.308305	0.228607	-0.00456397	0.98613	-0.229018	0.376601	0.246069	0.341077	-0.309055	0.227419	0.567091	0.0175985	-0.438664	0.0781633	-0.327372	0.199605	0.289378	0.259923	-0.145814	0.576564
ENSRNOG00000009848	Il18	29197	blue	0.683444	0.00248951	-0.685233	0.00239994	-0.785756	0.000184986	-0.530094	0.0286121	-0.790747	0.00015745	0.271382	0.292045	0.735298	0.000769974	0.652779	0.00450067	-0.559625	0.0194957	-0.18881	0.46799	-0.179502	0.490594	-0.0945199	0.718219	-0.335667	0.187778	0.311679	0.223291	0.318727	0.212441	-0.0362904	0.890022	0.475534	0.0536976
ENSRNOG00000007673	Ppig	83624	blue	0.683131	0.00250548	-0.728755	0.000905484	-0.760159	0.000397805	-0.678064	0.0027754	-0.466438	0.0591131	0.339563	0.182386	0.250674	0.331825	0.504534	0.0388867	-0.352578	0.165123	-0.202424	0.435884	-0.588372	0.0129746	-0.264253	0.305401	0.0876017	0.738136	-0.0684563	0.794047	-0.0260283	0.921012	-0.0523697	0.841782	-0.0169168	0.948619
ENSRNOG00000061543	Ap2b1	140670	blue	-0.682579	0.00253381	0.805301	9.6e-05	0.687758	0.00227807	0.396389	0.115211	0.658367	0.00405971	-0.289945	0.258949	-0.657799	0.00410283	-0.351568	0.166422	0.271019	0.292718	0.10664	0.683742	0.133636	0.609121	-0.141302	0.588539	0.522761	0.0313161	-0.320636	0.209561	-0.298485	0.24454	-0.137138	0.599684	-0.192653	0.45881
ENSRNOG00000005404	Rasgrp1	29434	blue	-0.682305	0.00254796	0.588216	0.0130046	0.568512	0.0172546	0.646283	0.0050612	0.242805	0.347725	-0.494025	0.0438412	-0.0519595	0.843007	-0.321057	0.20893	0.179742	0.490004	0.344935	0.175122	0.364499	0.150309	0.256538	0.320256	-0.166639	0.522674	0.105449	0.687105	-0.0128221	0.961046	-0.0841077	0.748256	0.381861	0.1304
ENSRNOG00000050206	Shank2	171093	blue	-0.681348	0.00259791	0.913066	3.15e-07	0.834027	3.17e-05	0.520715	0.0321042	0.66649	0.00348176	-0.483059	0.0495051	-0.624481	0.00736757	-0.587952	0.0130555	0.299063	0.243583	0.0944328	0.718469	0.0930592	0.72241	-0.00570256	0.98267	0.372276	0.14115	-0.380498	0.131892	-0.404926	0.10689	0.147356	0.572494	-0.0873364	0.738903
ENSRNOG00000000122	Ak2	24184	blue	0.679873	0.00267643	-0.826437	4.33e-05	-0.789241	0.000165372	-0.465892	0.0594509	-0.668987	0.0033182	0.429766	0.0851185	0.750889	0.000513327	0.70455	0.00158966	-0.342579	0.178283	-0.0282534	0.914282	-0.0494877	0.850394	0.030517	0.907441	-0.416323	0.0964597	0.48593	0.047972	0.39644	0.115159	-0.323159	0.205796	0.350542	0.167749
ENSRNOG00000009207	Spata2	114210	blue	-0.675984	0.0028929	0.92682	9.01e-08	0.838539	2.61e-05	0.53076	0.0283756	0.635847	0.00607852	-0.507833	0.0374225	-0.578693	0.0149408	-0.563227	0.0185616	0.265604	0.302843	0.0935893	0.720888	0.0770467	0.768825	0.0119499	0.963694	0.353802	0.163559	-0.427306	0.0871182	-0.467622	0.0583862	0.211614	0.414875	0.0366419	0.888963
ENSRNOG00000046566	Tub	25609	blue	-0.675893	0.00289813	0.882536	2.75e-06	0.589528	0.0127543	0.201917	0.437059	0.468797	0.0576714	-0.192873	0.458288	-0.705508	0.00155624	-0.319291	0.211587	-0.0307404	0.906766	-0.254119	0.325	0.146435	0.574924	-0.389086	0.122681	0.669038	0.00331491	-0.569622	0.0169893	-0.391275	0.120407	0.35436	0.162849	-0.191082	0.46255
ENSRNOG00000018507	Gfpt1	297417	blue	-0.673994	0.00300907	0.845543	1.91e-05	0.741891	0.000650865	0.629409	0.00678418	0.362811	0.152349	-0.490245	0.0457353	-0.225764	0.383604	-0.412467	0.0999032	0.163525	0.530581	0.184387	0.478666	0.368911	0.145065	0.13052	0.617565	0.0166744	0.949355	-0.0691856	0.791898	-0.136495	0.601412	0.0237577	0.927885	0.311559	0.223478
ENSRNOG00000048155	Olr745	366123	blue	-0.672759	0.00308304	0.720525	0.00110339	0.715393	0.00124393	0.588671	0.0129173	0.444078	0.0741397	-0.516172	0.0339092	-0.393237	0.118394	-0.637348	0.0059229	0.285286	0.267027	0.103808	0.691747	0.123807	0.635916	0.222182	0.391394	0.0172604	0.947577	-0.256915	0.319521	-0.218689	0.399075	0.376892	0.135899	0.0303448	0.907961
ENSRNOG00000027264	Dagla	309207	blue	-0.67207	0.00312495	0.822091	5.14e-05	0.846139	1.86e-05	0.76936	0.000305421	0.546333	0.0232653	-0.523523	0.0310261	-0.25514	0.322993	-0.534624	0.0270338	0.382958	0.129206	0.232973	0.368185	0.272686	0.28964	0.370779	0.142883	-0.0968417	0.711572	-0.12048	0.645086	-0.326769	0.200484	0.134999	0.60544	0.256182	0.320952
ENSRNOG00000052017	Dio3	29475	blue	-0.670833	0.00320137	0.878807	3.43e-06	0.806223	9.29e-05	0.417068	0.0958042	0.775874	0.00025149	-0.329832	0.196048	-0.765238	0.000344306	-0.535654	0.0266845	0.340996	0.180429	0.030263	0.908208	0.076903	0.769246	-0.108741	0.677822	0.55936	0.0195659	-0.465471	0.059712	-0.464466	0.060339	0.139589	0.593114	-0.28433	0.268703
ENSRNOG00000029986	Insr	24954	blue	-0.669936	0.0032577	0.626724	0.00709725	0.679385	0.00270285	0.640916	0.00556566	0.440429	0.0768341	-0.360503	0.15517	-0.213015	0.41172	-0.418128	0.0948771	0.376515	0.136323	0.378567	0.134027	0.508262	0.0372352	0.230981	0.372411	-0.0885289	0.735457	0.243881	0.345524	0.196549	0.449598	-0.336476	0.18665	0.0644554	0.805861
ENSRNOG00000016456	Il33	361749	blue	0.669651	0.00327579	-0.826763	4.27e-05	-0.644245	0.00524816	-0.337747	0.184886	-0.396797	0.114803	0.304965	0.23395	0.52196	0.0316229	0.40805	0.103955	-0.0577411	0.825777	0.031324	0.905004	-0.278549	0.278979	0.228659	0.377369	-0.421516	0.0919574	0.293007	0.253724	0.186953	0.472457	-0.175316	0.500929	0.111811	0.669206
ENSRNOG00000017012	Coq7	25249	blue	0.669407	0.00329131	-0.831271	3.55e-05	-0.690207	0.00216468	-0.580979	0.0144565	-0.465031	0.0599859	0.498338	0.0417531	0.386683	0.125211	0.431878	0.0834285	-0.16636	0.523379	-0.00523633	0.984087	-0.111088	0.671232	-0.126494	0.628548	-0.161211	0.536494	0.304959	0.233961	0.383577	0.128536	-0.303661	0.236057	-0.085098	0.745384
ENSRNOG00000014686	Kcnd3	65195	blue	-0.669322	0.00329677	0.881282	2.96e-06	0.763127	0.00036576	0.397639	0.113965	0.720266	0.00111014	-0.281667	0.273408	-0.71143	0.00136225	-0.436877	0.0795256	0.274588	0.286156	-0.00974297	0.970396	0.151172	0.562476	-0.131742	0.614248	0.554264	0.020954	-0.445581	0.0730499	-0.43564	0.0804786	0.119745	0.647119	-0.246142	0.34093
ENSRNOG00000019268	Pelp1	360552	blue	-0.667344	0.00342507	0.706483	0.00152284	0.600339	0.0108331	0.324367	0.204009	0.674688	0.00296814	-0.324888	0.203241	-0.742732	0.000636834	-0.41771	0.0952419	0.274613	0.286109	0.0143587	0.956381	-0.0763723	0.770798	-0.116444	0.656276	0.560033	0.0193882	-0.43098	0.0841438	-0.320095	0.210375	0.0851416	0.745257	-0.362052	0.153273
ENSRNOG00000006832	Zdhhc5	362156	blue	-0.667122	0.00343977	0.863759	7.89e-06	0.603756	0.0102762	0.335047	0.188645	0.375836	0.137088	-0.110367	0.673256	-0.401522	0.110156	-0.183245	0.481441	-0.00103202	0.996864	-0.131654	0.614488	0.539501	0.025411	-0.247287	0.338617	0.383265	0.128873	-0.0893719	0.733024	-0.0173496	0.947306	0.0168966	0.94868	-0.0482015	0.854243
ENSRNOG00000015906	Tgif1	316742	blue	0.66697	0.00344979	-0.609698	0.00936229	-0.744597	0.000606631	-0.724815	0.000996203	-0.643537	0.00531442	0.462576	0.0615311	0.415211	0.0974445	0.553923	0.0210493	-0.570479	0.0167868	-0.418114	0.0948893	-0.137359	0.599091	-0.388783	0.122999	0.0472069	0.857221	0.123631	0.6364	0.246948	0.339299	0.205078	0.429762	-0.00105522	0.996793
ENSRNOG00000052296	Shank3	59312	blue	-0.666157	0.00350407	0.906535	5.32e-07	0.916064	2.44e-07	0.689821	0.00218226	0.695974	0.00191589	-0.496815	0.0424816	-0.440105	0.0770772	-0.596214	0.0115368	0.408082	0.103926	0.184344	0.47877	0.265228	0.303553	0.226765	0.381443	0.130332	0.618078	-0.199559	0.442545	-0.371459	0.142093	0.130395	0.617906	0.0561957	0.830375
ENSRNOG00000002864	Nacc1	171454	blue	-0.664297	0.00363075	0.944216	1.24e-08	0.863915	7.83e-06	0.573616	0.0160617	0.613842	0.00876417	-0.448772	0.0707752	-0.515514	0.0341767	-0.569533	0.0170106	0.275705	0.284121	0.0510358	0.845766	0.195361	0.452396	0.057655	0.826033	0.25731	0.318752	-0.356155	0.160579	-0.439629	0.0774348	0.251364	0.330451	0.0607302	0.816898
ENSRNOG00000060130	Ypel4	502643	blue	-0.663249	0.0037037	0.816696	6.32e-05	0.630988	0.00660536	0.367681	0.146514	0.510999	0.0360575	-0.537065	0.0262119	-0.601547	0.0106335	-0.457021	0.0651366	0.0705416	0.787906	-0.0686343	0.793522	-0.243391	0.346524	-0.0990229	0.705345	0.474875	0.0540768	-0.643759	0.00529358	-0.667782	0.00339631	0.492766	0.0444652	0.0454575	0.862464
ENSRNOG00000014251	Capn5	171495	blue	-0.663142	0.00371125	0.8748	4.33e-06	0.888441	1.9e-06	0.586123	0.0134121	0.76872	0.000311212	-0.585706	0.0134946	-0.660321	0.00391404	-0.659971	0.00393977	0.428949	0.085779	0.248582	0.336011	-0.0456248	0.861962	0.095133	0.716462	0.367408	0.146837	-0.443944	0.0742374	-0.538873	0.0256154	0.0833389	0.750488	-0.065227	0.80358
ENSRNOG00000018230	Gtf2h2	294693	blue	0.662188	0.00377882	-0.799445	0.000117669	-0.576477	0.0154221	-0.405061	0.106763	-0.263885	0.3061	0.464823	0.0601155	0.294949	0.250444	0.318179	0.213272	0.0598535	0.8195	0.0754368	0.773536	-0.070623	0.787666	0.0588683	0.822426	-0.237355	0.358984	0.323412	0.20542	0.361999	0.153338	-0.427243	0.0871699	-0.217467	0.401781
ENSRNOG00000021262	Slc23a2	50622	blue	-0.661566	0.00382347	0.692793	0.00205004	0.544462	0.0238384	0.445103	0.0733948	0.216945	0.402939	-0.233586	0.36689	-0.216211	0.404572	-0.262256	0.309207	0.0625015	0.811646	0.0910468	0.728197	0.599292	0.0110083	-0.0544756	0.835499	0.0861995	0.742193	0.125893	0.630193	0.255681	0.321933	-0.108906	0.67736	0.0423431	0.871811
ENSRNOG00000014900	Crem	25620	blue	0.660118	0.00392899	-0.492861	0.0444177	-0.46069	0.0627382	-0.45417	0.0670466	-0.299584	0.242723	0.20313	0.434252	0.132471	0.612273	0.170507	0.512927	-0.167191	0.521277	-0.168935	0.516879	-0.420114	0.0931582	-0.113207	0.6653	-0.029808	0.909583	-0.130664	0.617176	-0.0366492	0.888941	0.0230444	0.930045	-0.0549811	0.833993
ENSRNOG00000005438	Pcsk2	25121	blue	-0.660071	0.00393244	0.696134	0.00190935	0.568493	0.0172591	0.365002	0.149705	0.628451	0.00689461	-0.213976	0.409565	-0.541617	0.0247307	-0.177899	0.494539	0.237377	0.358937	0.0355982	0.892108	0.0298739	0.909384	-0.0405344	0.877247	0.443429	0.0746136	-0.336453	0.186681	-0.421865	0.0916601	-0.0528249	0.840423	-0.0994938	0.704003
ENSRNOG00000049361	Gas7	85246	blue	-0.659841	0.0039494	0.8827	2.72e-06	0.864362	7.65e-06	0.479358	0.0515353	0.774028	0.000265893	-0.38558	0.126385	-0.788311	0.000170428	-0.687294	0.00230006	0.398352	0.113258	0.0620031	0.813123	0.083635	0.749628	-0.0503195	0.847907	0.479159	0.051646	-0.514834	0.0344552	-0.51386	0.0348566	0.23344	0.367198	-0.301532	0.239524
ENSRNOG00000014975	Zfp483	170955	blue	-0.659538	0.00397192	0.895299	1.2e-06	0.760696	0.000391834	0.497004	0.0423906	0.558501	0.0197947	-0.538175	0.0258444	-0.541954	0.0246236	-0.510776	0.0361522	0.16383	0.529805	0.0118753	0.96392	-0.0716093	0.784766	-0.00769532	0.976616	0.365699	0.14887	-0.543551	0.0241211	-0.647363	0.00496427	0.398704	0.112911	0.132102	0.613272
ENSRNOG00000000503	Ppard	25682	blue	-0.657689	0.00411126	0.934761	3.9e-08	0.706212	0.00153206	0.467293	0.0585874	0.431816	0.0834774	-0.335139	0.188517	-0.396148	0.115452	-0.303838	0.235771	0.0581113	0.824676	-0.0529865	0.839941	0.305587	0.232949	-0.0969795	0.711178	0.299075	0.243564	-0.245505	0.342219	-0.29149	0.256304	0.117089	0.654483	0.152302	0.559526
ENSRNOG00000000490	Rps10	81773	blue	0.657662	0.00411328	-0.830889	3.61e-05	-0.71494	0.00125699	-0.572692	0.0162729	-0.497803	0.042008	0.647482	0.00495366	0.404085	0.107691	0.446036	0.0727221	-0.188832	0.467936	-0.163766	0.529968	0.128633	0.622705	-0.119959	0.646527	-0.213604	0.410399	0.371074	0.14254	0.48424	0.0488699	-0.158069	0.544567	-0.278831	0.278473
ENSRNOG00000017605	Gmds	291095	blue	0.656432	0.00420821	-0.818415	5.92e-05	-0.741057	0.000665032	-0.608507	0.00954009	-0.378118	0.134527	0.637812	0.0058754	0.33755	0.185159	0.610348	0.0092664	-0.169247	0.516093	-0.10261	0.695145	-0.0908102	0.728878	-0.162228	0.533891	-0.051775	0.843558	0.284739	0.267985	0.323603	0.205137	-0.392174	0.119482	-0.160967	0.537118
ENSRNOG00000010034	Asah1	84431	blue	-0.65609	0.00423493	0.722139	0.00106199	0.461399	0.0622828	0.33412	0.189947	0.172357	0.508294	-0.30235	0.238188	-0.223128	0.38933	-0.148382	0.569793	-0.111931	0.668869	-0.0165031	0.949874	0.347961	0.171116	-0.166862	0.522108	0.219834	0.396549	-0.0476816	0.855799	0.0201798	0.938725	0.025533	0.922511	0.186628	0.473241
ENSRNOG00000017641	Rnf44	361212	blue	-0.656067	0.00423676	0.942815	1.49e-08	0.6898	0.00218319	0.372292	0.141131	0.434137	0.0816478	-0.177481	0.49557	-0.482257	0.0499398	-0.328319	0.198232	0.0201426	0.938837	-0.242639	0.348063	0.396122	0.115477	-0.188653	0.468366	0.381871	0.130388	-0.337252	0.185572	-0.293831	0.252328	0.357971	0.158304	-0.0194679	0.940883
ENSRNOG00000008447	Tmem132d	288750	blue	-0.655387	0.00429026	0.707029	0.00150438	0.545335	0.0235695	0.279561	0.277163	0.544628	0.0237872	-0.182894	0.482296	-0.537184	0.0261723	-0.158907	0.542407	0.141097	0.589087	0.0739788	0.777809	0.203776	0.43276	-0.219264	0.397806	0.532332	0.0278237	-0.230869	0.37265	-0.208083	0.422883	-0.182401	0.483498	-0.0942209	0.719076
ENSRNOG00000019486	Trpv1	83810	blue	0.655383	0.00429057	-0.655005	0.0043206	-0.316183	0.216317	-0.142644	0.584967	-0.0963359	0.713018	0.0649786	0.804314	0.226885	0.381183	-0.0455732	0.862117	0.265619	0.302814	0.216309	0.404353	-0.387708	0.124128	0.338544	0.183786	-0.361535	0.153905	0.146819	0.57391	0.050615	0.847023	-0.203595	0.433176	-0.172803	0.507182
ENSRNOG00000045605	Uxs1	246232	blue	0.655129	0.0043107	-0.745351	0.000594757	-0.503115	0.0395296	-0.243211	0.346892	-0.286986	0.264062	0.361931	0.153421	0.489621	0.0460538	0.331804	0.193227	0.0816123	0.755508	0.116068	0.657323	-0.0197179	0.940125	0.243381	0.346546	-0.431326	0.0838681	0.484111	0.0489391	0.332807	0.191802	-0.394714	0.116895	-0.0914992	0.726895
ENSRNOG00000007975	Ncoa2	83724	blue	-0.654658	0.00434829	0.941451	1.77e-08	0.782965	0.000202065	0.560237	0.0193345	0.486869	0.0474781	-0.532672	0.0277054	-0.442873	0.0750213	-0.477692	0.0524688	0.14669	0.574249	0.0446046	0.865022	0.0842141	0.747947	0.0102689	0.968798	0.26108	0.31146	-0.369614	0.144241	-0.485285	0.0483133	0.227431	0.380007	0.176856	0.497115
ENSRNOG00000021151	Ppp1r14b	259225	blue	0.652381	0.0045335	-0.907095	5.09e-07	-0.735992	0.000756646	-0.395236	0.116368	-0.617753	0.00822812	0.348508	0.170398	0.677064	0.00283141	0.481027	0.0506118	-0.163595	0.530403	0.115245	0.659613	-0.102145	0.696464	0.157526	0.545967	-0.526995	0.029732	0.51042	0.0363041	0.502045	0.0400193	-0.353784	0.163582	0.193448	0.456922
ENSRNOG00000001611	Rpl24	64307	blue	0.651764	0.00458476	-0.664418	0.0036224	-0.759474	0.000405517	-0.846439	1.84e-05	-0.396427	0.115173	0.617604	0.00824809	0.0360109	0.890864	0.498935	0.0414699	-0.409453	0.102656	-0.488358	0.0467031	-0.391119	0.120568	-0.49448	0.0436171	0.341937	0.179151	-0.228038	0.378703	-0.0484481	0.853505	0.219065	0.398244	-0.374332	0.138794
ENSRNOG00000005333	Azin1	58961	blue	-0.650128	0.00472297	0.662049	0.0037888	0.600617	0.0107869	0.747212	0.000566266	0.235404	0.363065	-0.545334	0.02357	0.122403	0.63978	-0.214605	0.408156	0.153716	0.555841	0.299543	0.242791	0.357024	0.159488	0.399159	0.112463	-0.303087	0.236989	0.212497	0.412886	-0.0497109	0.849726	-0.0721879	0.783066	0.58798	0.01305
ENSRNOG00000020277	Cntnap1	84008	blue	-0.64992	0.00474084	0.902264	7.34e-07	0.902858	7.02e-07	0.551655	0.0216935	0.797747	0.000124688	-0.466736	0.0589298	-0.694069	0.00199534	-0.658166	0.00407494	0.428115	0.0864564	0.133244	0.61018	0.0540011	0.836914	0.0527943	0.840514	0.403607	0.108147	-0.437477	0.0790663	-0.52635	0.0299691	0.171099	0.511442	-0.178161	0.493894
ENSRNOG00000005618	Fmc1	500087	blue	0.649411	0.00478462	-0.72549	0.000980146	-0.754493	0.000465478	-0.655228	0.00430283	-0.520202	0.0323043	0.840487	2.4e-05	0.450578	0.0695111	0.703441	0.00162908	-0.340177	0.181546	-0.36898	0.144984	0.240505	0.352451	-0.255817	0.321666	-0.0951696	0.716357	0.370132	0.143635	0.437473	0.0790692	-0.147221	0.572849	-0.16669	0.522544
ENSRNOG00000038166	Ptgr2	299194	blue	0.649167	0.00480572	-0.770069	0.000299124	-0.513388	0.0350529	-0.281056	0.274493	-0.383443	0.128681	0.423694	0.0901149	0.572791	0.0162501	0.371021	0.142601	0.0396677	0.879854	0.210715	0.416908	0.189544	0.466229	0.169677	0.515011	-0.465329	0.0598	0.626091	0.00717271	0.538424	0.0257627	-0.560666	0.0192221	0.00578809	0.98241
ENSRNOG00000006859	Insig1	64194	blue	0.648803	0.00483736	-0.688741	0.00223198	-0.653418	0.00444838	-0.515933	0.0340063	-0.549713	0.0222573	0.185373	0.476275	0.503986	0.0391336	0.46567	0.0595881	-0.358505	0.15764	-0.0102777	0.968772	-0.377864	0.134811	-0.112402	0.667552	-0.141423	0.588216	0.121813	0.641406	0.0459653	0.860942	-0.0560685	0.830754	0.323938	0.204642
ENSRNOG00000019326	Cfdp1	292027	blue	0.648416	0.00487123	-0.695897	0.00191908	-0.614024	0.00873866	-0.567072	0.0176032	-0.336601	0.186476	0.250184	0.332802	0.100399	0.701426	0.245031	0.343183	-0.150828	0.563377	-0.0727033	0.781552	-0.54251	0.0244478	-0.152737	0.558389	0.0378617	0.885289	-0.136015	0.602702	0.0337607	0.897649	-0.0858917	0.743084	-0.175752	0.499848
ENSRNOG00000025704	Yod1	363982	blue	-0.647463	0.00495539	0.56597	0.0178737	0.662711	0.00374168	0.830879	3.61e-05	0.319018	0.212	-0.747379	0.000563772	0.015478	0.952984	-0.455038	0.0664609	0.356092	0.160658	0.574004	0.0159738	0.156426	0.548809	0.510065	0.0364561	-0.343559	0.176963	0.173278	0.505996	-0.0626317	0.81126	-0.213828	0.409896	0.485167	0.0483759
ENSRNOG00000005012	Utp14a	317579	blue	0.646573	0.00503503	-0.787712	0.000173749	-0.556845	0.0202416	-0.336534	0.186569	-0.408959	0.103112	0.322247	0.207152	0.49381	0.0439471	0.336985	0.185943	-0.0166353	0.949473	0.214386	0.408647	-0.091296	0.72748	0.105045	0.688246	-0.383067	0.129089	0.414552	0.0980309	0.314056	0.219592	-0.473115	0.0551	0.098025	0.708192
ENSRNOG00000008354	Slc9a8	311651	blue	-0.645846	0.00510078	0.848067	1.7e-05	0.56866	0.017219	0.293258	0.253299	0.369057	0.144894	-0.227669	0.379496	-0.461324	0.0623309	-0.207882	0.423342	-0.0562722	0.830147	-0.137928	0.597561	0.327606	0.199266	-0.277024	0.281729	0.478498	0.0520157	-0.302875	0.237334	-0.195771	0.451429	0.176315	0.498452	0.0230965	0.929887
ENSRNOG00000036662	Wdr45b	360682	blue	0.645458	0.00513617	-0.591087	0.0124617	-0.572879	0.01623	-0.513722	0.0349138	-0.450825	0.0693401	0.0803512	0.75918	0.157373	0.546364	0.157906	0.544986	-0.270877	0.29298	-0.115635	0.658528	-0.638635	0.00579198	-0.176626	0.497683	-0.0132173	0.959846	-0.194929	0.453415	-0.0665044	0.799806	0.0962846	0.713165	0.0325672	0.90125
ENSRNOG00000012729	Mfsd8	361939	blue	-0.645335	0.00514746	0.95087	4.87e-09	0.730956	0.000857865	0.470677	0.0565412	0.435521	0.0805713	-0.432362	0.0830446	-0.437663	0.0789243	-0.38663	0.125268	0.0512016	0.845271	-0.0445303	0.865245	0.161378	0.536066	-0.104073	0.690997	0.33048	0.195119	-0.363767	0.151192	-0.435822	0.0803383	0.232998	0.368133	0.181986	0.484511
ENSRNOG00000049430	Mpv17	360463	blue	-0.644304	0.00524271	0.901105	7.99e-07	0.694579	0.00197383	0.506385	0.03806	0.382516	0.129686	-0.42674	0.0875828	-0.350849	0.167351	-0.334958	0.18877	0.0641288	0.806828	0.0239311	0.92736	0.223409	0.388717	-0.0530906	0.83963	0.236983	0.359761	-0.22423	0.386931	-0.301213	0.240046	0.0825658	0.752735	0.208324	0.422334
ENSRNOG00000003614	Mgat5	65271	blue	-0.642883	0.00537621	0.951737	4.27e-09	0.742969	0.000632939	0.382537	0.129664	0.555459	0.0206217	-0.399453	0.112173	-0.624076	0.00741723	-0.438612	0.0782027	0.0994165	0.704224	-0.0724647	0.782253	0.0772387	0.768264	-0.199044	0.443746	0.523578	0.0310056	-0.495664	0.0430388	-0.471898	0.0558161	0.255268	0.322742	-0.0102576	0.968833
ENSRNOG00000023363	Ing4	297597	blue	0.642767	0.00538731	-0.923518	1.24e-07	-0.777071	0.000242501	-0.553288	0.0212283	-0.538818	0.0256336	0.335084	0.188594	0.408981	0.103092	0.404999	0.106821	-0.186989	0.472371	0.0913893	0.727211	-0.270746	0.293222	-0.0774977	0.767507	-0.209643	0.419335	0.319621	0.211089	0.435843	0.0803217	-0.338646	0.183646	-0.0868898	0.740195
ENSRNOG00000002373	Akap1	114124	blue	-0.642477	0.0054149	0.842518	2.19e-05	0.903443	6.72e-07	0.787496	0.000174963	0.596249	0.0115308	-0.532332	0.0278237	-0.297939	0.245447	-0.594002	0.011929	0.449448	0.0703	0.330525	0.195054	0.354413	0.162781	0.336516	0.186594	-0.0700687	0.789298	-0.038849	0.882317	-0.247096	0.339001	-0.0627104	0.811027	0.169957	0.514307
ENSRNOG00000008376	LOC100909595	25551	blue	-0.641596	0.00549955	0.841315	2.31e-05	0.786673	0.000179643	0.3803	0.13211	0.768787	0.000310601	-0.44479	0.0736216	-0.8525	1.38e-05	-0.644854	0.00519167	0.339487	0.18249	0.0534914	0.838435	-0.139682	0.592864	-0.125033	0.63255	0.604648	0.0101347	-0.633863	0.00628939	-0.588395	0.0129702	0.240268	0.35294	-0.311759	0.223166
ENSRNOG00000012172	Spi1	366126	blue	0.640573	0.0055992	-0.673097	0.00306265	-0.318077	0.213426	-0.205054	0.429817	-0.0163484	0.950343	0.314744	0.218529	0.210706	0.416927	0.0710569	0.78639	0.322352	0.206995	0.225542	0.384085	-0.0817657	0.755062	0.249123	0.334926	-0.29776	0.245743	0.360658	0.154979	0.302362	0.238169	-0.477463	0.0525981	-0.291158	0.256871
ENSRNOG00000009716	Casc3	259170	blue	-0.639337	0.00572152	0.938652	2.49e-08	0.657483	0.00412703	0.373169	0.140124	0.358848	0.157215	-0.247014	0.339167	-0.398315	0.113295	-0.266487	0.301177	-0.0448392	0.864319	-0.167634	0.520157	0.393086	0.118549	-0.220751	0.394532	0.369985	0.143807	-0.239989	0.353517	-0.205532	0.428718	0.219001	0.398385	0.111439	0.670247
ENSRNOG00000016156	Nptxr	81005	blue	-0.637676	0.00588926	0.876355	3.96e-06	0.949113	6.31e-09	0.651715	0.00458888	0.825039	4.58e-05	-0.5258	0.0301725	-0.649063	0.00481479	-0.737194	0.000734008	0.531109	0.0282525	0.218521	0.399445	0.0571683	0.82748	0.204278	0.431603	0.259141	0.315198	-0.388902	0.122874	-0.50411	0.0390777	0.143868	0.581717	-0.139715	0.592775
ENSRNOG00000006116	Hk2	25059	blue	-0.637463	0.00591109	0.800571	0.000113204	0.765109	0.000345583	0.60029	0.0108412	0.591516	0.0123821	-0.542328	0.0245051	-0.452065	0.0684834	-0.48314	0.049461	0.345165	0.174815	0.276738	0.282246	0.0582467	0.824273	0.13043	0.61781	0.199447	0.442806	-0.179126	0.491518	-0.274226	0.286817	-0.157108	0.547046	0.0599196	0.819303
ENSRNOG00000013013	Tle3	84424	blue	-0.637106	0.00594776	0.838866	2.58e-05	0.857143	1.1e-05	0.695609	0.00193092	0.613735	0.00877931	-0.452191	0.0683966	-0.319023	0.211992	-0.493202	0.0442481	0.398523	0.113089	0.279379	0.277489	0.378281	0.134346	0.239586	0.354349	0.0407283	0.876664	-0.0105317	0.968	-0.173454	0.505558	-0.115208	0.659716	0.15313	0.557366
ENSRNOG00000005470	Atxn3	60331	blue	-0.636777	0.00598173	0.842274	2.22e-05	0.859358	9.88e-06	0.650573	0.00468507	0.590943	0.0124885	-0.531115	0.0282504	-0.440151	0.0770429	-0.617348	0.00828248	0.366551	0.147854	0.269476	0.295581	0.209242	0.420246	0.149368	0.567203	0.134328	0.607251	-0.22311	0.389368	-0.369869	0.143943	0.0340524	0.896769	0.101033	0.699624
ENSRNOG00000016998	Atxn1	25049	blue	-0.636574	0.0060028	0.952542	3.78e-09	0.701808	0.00168859	0.441402	0.076109	0.373113	0.140187	-0.361911	0.153445	-0.358347	0.157837	-0.316674	0.215565	-0.01627	0.950581	-0.0989999	0.705411	0.315149	0.217906	-0.143312	0.583192	0.316687	0.215546	-0.246258	0.340695	-0.291802	0.255772	0.24639	0.340427	0.192798	0.458465
ENSRNOG00000011884	Golga2	64528	blue	-0.635377	0.00612795	0.820076	5.56e-05	0.810372	8e-05	0.479999	0.0511792	0.708791	0.0014461	-0.335879	0.187482	-0.611583	0.00908635	-0.524866	0.0305206	0.385949	0.125992	0.181882	0.484765	0.234122	0.365759	-0.0205821	0.937505	0.381245	0.131073	-0.236392	0.360994	-0.256216	0.320885	-0.0834061	0.750293	-0.169214	0.516174
ENSRNOG00000055344	Trnau1ap	65241	blue	0.635364	0.00612934	-0.730632	0.000864754	-0.651713	0.00458903	-0.51363	0.0349522	-0.529265	0.0289085	0.575031	0.015743	0.441783	0.0758264	0.468974	0.0575641	-0.225463	0.384256	-0.0986699	0.706352	0.0988486	0.705842	-0.130177	0.618498	-0.238297	0.357023	0.312061	0.222694	0.36998	0.143814	-0.25356	0.326102	-0.00380065	0.98845
ENSRNOG00000019181	Synpo	60324	blue	-0.634634	0.00620679	0.878865	3.42e-06	0.896096	1.14e-06	0.548693	0.0225576	0.765387	0.000342831	-0.429106	0.0856517	-0.728951	0.000901171	-0.746001	0.00058467	0.439364	0.0776345	0.0686323	0.793528	0.0779128	0.766294	0.0655012	0.802769	0.353731	0.163649	-0.49934	0.0412788	-0.523116	0.0311808	0.311742	0.223192	-0.236129	0.361545
ENSRNOG00000038973	Acd	307798	blue	0.633115	0.00637035	-0.870483	5.51e-06	-0.719044	0.00114252	-0.627841	0.00696567	-0.34277	0.178025	0.387451	0.124399	0.168178	0.518785	0.350824	0.167383	-0.114079	0.662865	0.0215908	0.934448	-0.399287	0.112337	-0.178898	0.492078	0.0415925	0.874066	0.101361	0.698689	0.233616	0.366826	-0.257321	0.31873	-0.297291	0.246524
ENSRNOG00000011857	Mtpn	79215	blue	-0.632107	0.00648092	0.661578	0.0038226	0.528581	0.0291547	0.327883	0.198864	0.507757	0.0374559	-0.489254	0.0462418	-0.587191	0.013203	-0.403223	0.108515	0.14121	0.588785	0.00198992	0.993952	-0.352012	0.16585	-0.0334225	0.898669	0.414489	0.0980872	-0.581198	0.0144108	-0.57726	0.0152507	0.327504	0.199415	-0.00245209	0.992548
ENSRNOG00000002194	Coq2	498332	blue	-0.631873	0.00650679	0.911861	3.48e-07	0.736555	0.000745982	0.419539	0.0936531	0.538257	0.0258175	-0.417058	0.0958131	-0.576944	0.0153197	-0.466286	0.0592068	0.132845	0.611259	-0.0427164	0.87069	0.0451228	0.863468	-0.127576	0.625588	0.423857	0.089978	-0.451727	0.0687161	-0.492586	0.0445549	0.24606	0.341095	0.0090524	0.972493
ENSRNOG00000054917	Mrgpre	404660	blue	-0.631833	0.00651113	0.756526	0.000440172	0.736675	0.000743725	0.416329	0.0964543	0.782549	0.000204715	-0.344731	0.175393	-0.730441	0.000868825	-0.460954	0.0625683	0.402256	0.109445	0.188967	0.467613	-0.00805744	0.975516	-0.0620683	0.812929	0.532614	0.0277257	-0.410382	0.101802	-0.455699	0.0660174	-0.114438	0.661864	-0.2488	0.335573
ENSRNOG00000015799	Nat8f1	59300	blue	0.631719	0.00652384	-0.635608	0.00610364	-0.611641	0.00907798	-0.584467	0.0137416	-0.266409	0.301324	0.368578	0.145456	0.0966336	0.712167	0.412017	0.100312	-0.170527	0.512876	-0.133947	0.608279	-0.531921	0.0279671	-0.22803	0.37872	0.150194	0.565038	-0.104004	0.691193	-0.0774318	0.7677	-0.196151	0.450534	-0.146402	0.57501
ENSRNOG00000056654	Dnaaf4	363096	blue	0.630257	0.0066877	-0.787315	0.000175983	-0.435091	0.0809042	-0.206274	0.427017	-0.200337	0.440731	0.321257	0.20863	0.472593	0.0554063	0.245133	0.342975	0.214205	0.409052	0.290245	0.258435	-0.0139116	0.957738	0.320275	0.210105	-0.471011	0.0563421	0.520623	0.0321399	0.366512	0.147901	-0.511164	0.0359875	-0.0646954	0.805152
ENSRNOG00000002364	Rnf112	24916	blue	-0.630189	0.00669529	0.759799	0.00040184	0.833897	3.18e-05	0.603111	0.0103796	0.839485	2.51e-05	-0.327337	0.199656	-0.653977	0.00440298	-0.615132	0.00858446	0.548119	0.0227283	0.103113	0.693717	0.0736769	0.778695	0.226852	0.381255	0.24818	0.336817	-0.408459	0.103576	-0.582784	0.014083	0.199804	0.441972	-0.270329	0.293996
ENSRNOG00000013869	Kcnj4	116649	blue	-0.629177	0.00681082	0.771393	0.000287647	0.737799	0.000722834	0.342049	0.179	0.746483	0.000577291	-0.324766	0.20342	-0.851076	1.48e-05	-0.637681	0.00588874	0.343632	0.176866	-0.0287719	0.912714	-0.110013	0.674248	-0.120186	0.645901	0.574335	0.0158992	-0.664335	0.00362807	-0.629836	0.0067354	0.374311	0.138818	-0.369522	0.144349
ENSRNOG00000007249	Cdkn1b	83571	blue	0.628319	0.00690991	-0.839925	2.46e-05	-0.78103	0.000214662	-0.450214	0.069765	-0.669688	0.00327342	0.478607	0.0519543	0.660874	0.0038736	0.568612	0.0172305	-0.286901	0.26421	-0.113428	0.664684	0.0454231	0.862567	0.0626752	0.811131	-0.459841	0.0632877	0.484013	0.0489915	0.575894	0.015551	-0.175131	0.501386	0.115685	0.658387
ENSRNOG00000001149	Pxn	360820	blue	-0.628008	0.00694612	0.595955	0.0115823	0.708672	0.00144995	0.654958	0.00432431	0.413291	0.0991609	-0.445349	0.0732174	-0.180862	0.487258	-0.559166	0.0196174	0.385991	0.125948	0.365019	0.149685	0.482138	0.0500045	0.315687	0.217077	-0.170949	0.511818	0.174618	0.502661	0.137264	0.599345	-0.0648839	0.804594	0.0464319	0.859543
ENSRNOG00000012641	Sfr1	294030	blue	0.627871	0.0069621	-0.697865	0.00183963	-0.612107	0.00901083	-0.494283	0.043714	-0.435792	0.0803614	0.352929	0.164674	0.446831	0.0721529	0.466132	0.0593021	-0.195242	0.452678	0.0605204	0.81752	-0.0952211	0.716209	-0.125573	0.631069	-0.142904	0.584275	0.464166	0.060527	0.483531	0.0492505	-0.469078	0.0575012	0.01912	0.941937
ENSRNOG00000009772	Kirrel3	315546	blue	-0.627685	0.00698382	0.890334	1.68e-06	0.59692	0.0114139	0.220373	0.395362	0.475687	0.0536099	-0.217013	0.402787	-0.625498	0.00724395	-0.286474	0.264952	-0.0449547	0.863972	-0.29514	0.250123	0.0716032	0.784784	-0.325896	0.20176	0.620334	0.00788893	-0.564725	0.0181833	-0.527153	0.0296739	0.447125	0.0719427	-0.118056	0.651798
ENSRNOG00000007124	Krcc1	312437	blue	0.627514	0.00700399	-0.740524	0.00067421	-0.620454	0.00787344	-0.314665	0.218652	-0.604367	0.0101791	0.441254	0.0762193	0.705306	0.00156325	0.455281	0.0662976	-0.172746	0.507325	0.0212637	0.935439	0.258258	0.316908	0.12367	0.636293	-0.574251	0.0159181	0.700747	0.00172818	0.718576	0.00115511	-0.401263	0.110406	0.153952	0.555228
ENSRNOG00000006720	Rnpep	81761	blue	-0.627319	0.00702687	0.714302	0.00127563	0.68083	0.00262525	0.462825	0.0613732	0.61183	0.00905065	-0.2056	0.428563	-0.556797	0.0202548	-0.408915	0.103153	0.349024	0.169724	0.0969562	0.711245	0.231236	0.371868	-0.0173919	0.947178	0.327625	0.199238	-0.203756	0.432806	-0.280551	0.275394	-0.0610283	0.816013	-0.246179	0.340854
ENSRNOG00000007705	Kcnj10	29718	blue	-0.627005	0.00706391	0.872424	4.95e-06	0.82342	4.88e-05	0.749567	0.000531869	0.483874	0.049066	-0.623317	0.007511	-0.193145	0.45764	-0.471592	0.055997	0.271768	0.291332	0.237961	0.357722	0.210297	0.417853	0.304641	0.234473	-0.0619368	0.813319	-0.0776529	0.767054	-0.317907	0.213684	0.0566187	0.829116	0.38437	0.127681
ENSRNOG00000011917	Cd79b	171055	blue	0.626743	0.00709499	-0.411712	0.100588	-0.607918	0.00962906	-0.680108	0.00266378	-0.377639	0.135063	0.495273	0.0432288	0.116211	0.656926	0.548168	0.0227135	-0.452311	0.0683143	-0.519769	0.032474	-0.413268	0.0991814	-0.438291	0.0784466	0.291499	0.256288	-0.240592	0.352272	-0.208241	0.422523	0.174614	0.502671	-0.058672	0.823009
ENSRNOG00000009887	Arih1	300756	blue	-0.626559	0.00711688	0.615395	0.00854817	0.632363	0.00645269	0.770976	0.000291223	0.240778	0.351888	-0.530823	0.0283535	0.0607425	0.816861	-0.33798	0.184564	0.249511	0.334147	0.385982	0.125957	0.413895	0.0986182	0.415814	0.0969099	-0.34015	0.181583	0.191285	0.462068	-0.0189459	0.942465	-0.133315	0.609988	0.467714	0.0583302
ENSRNOG00000000470	Vps52	25218	blue	-0.625467	0.00724768	0.738789	0.000704853	0.612613	0.00893831	0.465797	0.0595095	0.385744	0.12621	-0.60749	0.00969408	-0.401333	0.110339	-0.452225	0.068373	0.107843	0.68035	0.0706965	0.78745	-0.261854	0.309975	0.0770323	0.768868	0.19971	0.442192	-0.493232	0.0442333	-0.577944	0.0151022	0.353901	0.163433	0.268761	0.296915
ENSRNOG00000032735	Srek1	56763	blue	0.624898	0.00731664	-0.775509	0.000254279	-0.714308	0.00127544	-0.488199	0.0467858	-0.575513	0.0156354	0.0877805	0.737619	0.378775	0.133796	0.297026	0.246965	-0.28755	0.263082	0.0140217	0.957404	-0.514213	0.0347108	-0.0557779	0.831619	-0.203433	0.43355	0.0850027	0.74566	0.205811	0.428079	-0.0665993	0.799525	0.105418	0.687193
ENSRNOG00000009974	Coq3	29309	blue	0.624379	0.00738001	-0.763352	0.000363423	-0.593389	0.0120394	-0.577737	0.0151469	-0.165777	0.524856	0.639864	0.00566908	0.088953	0.734233	0.368084	0.146038	0.0110234	0.966507	-0.0917188	0.726263	-0.0935484	0.721006	-0.167218	0.521208	0.0696562	0.790512	0.126549	0.628397	0.199511	0.442655	-0.280335	0.27578	-0.454114	0.067085
ENSRNOG00000011931	Smarca2	361745	blue	0.623944	0.00743349	-0.861376	8.92e-06	-0.813167	7.22e-05	-0.55427	0.0209521	-0.605394	0.0100175	0.436621	0.0797222	0.518431	0.0330023	0.580331	0.0145925	-0.287109	0.263848	-0.0492582	0.851081	-0.186551	0.473428	-0.0926448	0.723601	-0.238583	0.356429	0.415861	0.0968683	0.48104	0.0506048	-0.330829	0.194619	-0.00944388	0.971304
ENSRNOG00000001449	Pom121	113975	blue	-0.623865	0.00744323	0.944318	1.22e-08	0.800211	0.000114615	0.510174	0.0364094	0.52012	0.0323365	-0.279118	0.277956	-0.464626	0.0602388	-0.461941	0.0619359	0.183147	0.481681	-0.0688439	0.792905	0.422453	0.0911616	-0.045279	0.862999	0.267328	0.299596	-0.246356	0.340497	-0.268674	0.297077	0.220268	0.395593	-0.00231952	0.992951
ENSRNOG00000030775	Adarb2	117088	blue	-0.621172	0.00778133	0.729079	0.000898337	0.744988	0.000600441	0.746214	0.000581399	0.456861	0.0652427	-0.491378	0.045161	-0.0496838	0.849808	-0.321758	0.207882	0.31418	0.2194	0.336102	0.18717	0.355331	0.161618	0.381654	0.130625	-0.171018	0.511645	0.095436	0.715594	-0.228482	0.37775	-0.115562	0.65873	0.43269	0.0827855
ENSRNOG00000020027	Arhgef2	310635	blue	-0.621129	0.00778679	0.860413	9.37e-06	0.743461	0.000624879	0.607914	0.00962958	0.418156	0.0948534	-0.379023	0.133522	-0.26054	0.312499	-0.417811	0.0951537	0.16596	0.524393	-0.00449474	0.98634	0.347026	0.172347	0.140659	0.590254	0.0317878	0.903603	-0.162028	0.534402	-0.308078	0.228968	0.269756	0.295059	0.244267	0.344738
ENSRNOG00000046955	Cbx6	315136	blue	-0.619484	0.00799946	0.95409	2.96e-09	0.757519	0.000428235	0.351178	0.166925	0.575727	0.015588	-0.234136	0.36573	-0.657768	0.0041052	-0.460146	0.0630898	0.132935	0.611015	-0.182359	0.4836	0.237095	0.359527	-0.220169	0.39581	0.513791	0.0348855	-0.461068	0.0624948	-0.399636	0.111994	0.315924	0.216713	-0.173471	0.505515
ENSRNOG00000001621	C2cd2	304055	blue	-0.618973	0.0080664	0.750666	0.000516414	0.522369	0.031466	0.401587	0.110092	0.233198	0.367709	-0.249908	0.333354	-0.184753	0.477779	-0.118418	0.650795	-0.0201683	0.938759	0.0378399	0.885355	0.492378	0.0446587	-0.100795	0.700299	0.170891	0.511963	0.088979	0.734158	0.137025	0.599986	-0.162462	0.533294	0.156109	0.54963
ENSRNOG00000011375	Tsc2	24855	blue	0.61872	0.00809969	-0.341833	0.179292	-0.435719	0.080418	-0.67623	0.00287883	-0.119992	0.646437	0.592913	0.0121259	-0.130069	0.618794	0.289191	0.260246	-0.237708	0.358248	-0.545361	0.0235617	-0.193784	0.456127	-0.466888	0.0588361	0.404808	0.107002	-0.184358	0.478737	-0.0261585	0.920618	0.18553	0.475896	-0.500156	0.0408961
ENSRNOG00000003599	Utp3	305258	blue	0.618036	0.00819035	-0.861082	9.06e-06	-0.710114	0.00140355	-0.566925	0.0176391	-0.369614	0.144241	0.507232	0.037686	0.257964	0.31748	0.433385	0.0822379	-0.0965591	0.71238	-0.00777363	0.976378	-0.256662	0.320014	-0.101741	0.697612	-0.0867083	0.74072	0.138536	0.595931	0.196344	0.45008	-0.286766	0.264444	-0.190934	0.462906
ENSRNOG00000006130	Rab5b	288779	blue	-0.616372	0.00841432	0.880853	3.04e-06	0.547978	0.0227702	0.225899	0.383313	0.362385	0.152868	0.00312832	0.990493	-0.494733	0.0434932	-0.123142	0.637746	-0.0835325	0.749926	-0.342417	0.178502	0.415466	0.0972178	-0.347555	0.17165	0.516027	0.0339677	-0.338976	0.183191	-0.245469	0.342293	0.250979	0.331218	-0.106559	0.683972
ENSRNOG00000007645	Kcnj9	116560	blue	-0.615951	0.00847185	0.770599	0.000294483	0.442709	0.0751422	0.0746534	0.775831	0.439698	0.0773828	0.0828619	0.751874	-0.704032	0.00160799	-0.11721	0.654148	-0.0609518	0.81624	-0.382932	0.129235	0.236295	0.361197	-0.466767	0.0589108	0.721347	0.00108213	-0.528743	0.0290962	-0.336935	0.186011	0.260382	0.312802	-0.354149	0.163117
ENSRNOG00000010800	Hadhb	171155	blue	0.615037	0.00859755	-0.767686	0.000320746	-0.85455	1.25e-05	-0.804521	9.86e-05	-0.634577	0.00621291	0.691706	0.00209762	0.359279	0.156679	0.643911	0.00527934	-0.494982	0.043371	-0.360299	0.155421	0.0243993	0.925942	-0.431369	0.0838332	0.0520919	0.842611	0.221529	0.392824	0.456039	0.0657902	-0.0492093	0.851227	-0.172933	0.506858
ENSRNOG00000003098	Prom1	60357	blue	0.614839	0.00862501	-0.351198	0.166899	-0.402425	0.109283	-0.586336	0.0133701	-0.197444	0.447494	0.412532	0.099845	0.045592	0.862061	0.271611	0.291623	-0.247175	0.338841	-0.3746	0.138489	-0.220491	0.395104	-0.349828	0.168675	0.246842	0.339514	-0.0661367	0.800892	-0.00917779	0.972112	0.11483	0.660771	-0.282704	0.27157
ENSRNOG00000038330	RGD1359508	361941	blue	0.613546	0.00880591	-0.82008	5.56e-05	-0.640185	0.00563741	-0.310788	0.224687	-0.464056	0.0605962	0.419617	0.093586	0.658947	0.00401603	0.552985	0.0213139	-0.0608258	0.816614	0.200404	0.440574	0.118329	0.651041	0.15739	0.546319	-0.475339	0.0538095	0.694987	0.00195676	0.610033	0.00931284	-0.667375	0.00342302	0.139469	0.593436
ENSRNOG00000000779	Znrd1	361784	blue	0.613265	0.00884564	-0.91021	3.98e-07	-0.616945	0.00833667	-0.269359	0.2958	-0.438119	0.0785773	0.236088	0.361631	0.58773	0.0130983	0.339463	0.182524	0.0464408	0.859516	0.325849	0.201829	-0.137772	0.597981	0.276115	0.283376	-0.53203	0.0279293	0.530872	0.0283361	0.470058	0.0569114	-0.515084	0.0343525	0.110552	0.672735
ENSRNOG00000004196	Rps29	25348	blue	0.612923	0.00889421	-0.84644	1.84e-05	-0.66048	0.00390238	-0.448694	0.0708306	-0.432429	0.0829918	0.24223	0.348902	0.452514	0.0681751	0.326876	0.200328	-0.131208	0.615697	0.053968	0.837013	-0.314403	0.219056	0.103304	0.693177	-0.305151	0.233652	0.219092	0.398184	0.213034	0.411677	-0.054344	0.835892	0.040826	0.87637
ENSRNOG00000019585	Kat8	310194	blue	0.611285	0.0091296	-0.899061	9.26e-07	-0.66358	0.00368055	-0.327857	0.198901	-0.457406	0.0648819	0.399463	0.112164	0.622064	0.00766794	0.481303	0.0504603	-0.0220535	0.933047	0.215327	0.406543	0.0169199	0.94861	0.207542	0.424117	-0.498084	0.0418739	0.578272	0.0150312	0.504346	0.0389712	-0.52824	0.029278	0.0972873	0.710298
ENSRNOG00000016815	Tmem135	293098	blue	-0.611007	0.00917002	0.703986	0.0016096	0.448733	0.0708029	0.193662	0.456415	0.221993	0.391809	-0.245652	0.341922	-0.430626	0.0844274	-0.22832	0.378097	-0.117613	0.653027	-0.086005	0.742756	0.285939	0.265886	-0.336758	0.186257	0.463318	0.0610608	-0.268779	0.296881	-0.0442007	0.866234	0.172121	0.508886	-0.0444282	0.865551
ENSRNOG00000011726	Grin1	24408	blue	-0.61093	0.00918116	0.78034	0.000219314	0.713185	0.00130875	0.385454	0.126521	0.746498	0.000577059	-0.0877945	0.737579	-0.680184	0.00265972	-0.373221	0.140064	0.358362	0.157818	-0.0562462	0.830225	0.242422	0.348508	-0.0670034	0.798333	0.476186	0.0533242	-0.364948	0.149769	-0.38425	0.127811	0.0752592	0.774057	-0.326286	0.20119
ENSRNOG00000020778	Chrnb2	54239	blue	-0.610807	0.00919916	0.865513	7.2e-06	0.589337	0.0127906	0.282596	0.271761	0.454643	0.0667271	-0.139782	0.592597	-0.523834	0.0309084	-0.160032	0.539516	0.0105939	0.967811	-0.155566	0.551036	0.267284	0.29968	-0.283184	0.270722	0.526726	0.0298305	-0.354021	0.163279	-0.326547	0.200809	0.054671	0.834917	-0.0390686	0.881656
ENSRNOG00000004359	Wars	314442	blue	-0.610063	0.0093084	0.726804	0.000949528	0.360308	0.155411	-0.0100998	0.969312	0.292153	0.255175	0.102357	0.695862	-0.575244	0.0156953	-0.0197513	0.940024	-0.199429	0.442847	-0.357398	0.15902	0.367805	0.146367	-0.575373	0.0156666	0.719461	0.00113139	-0.35076	0.167465	-0.110247	0.673593	0.180697	0.487664	-0.258783	0.315892
ENSRNOG00000036828	Pde1b	29691	blue	-0.609959	0.00932371	0.81927	5.73e-05	0.516012	0.033974	0.153035	0.557615	0.352189	0.165622	-0.195028	0.453182	-0.612162	0.00900286	-0.265394	0.30324	-0.0929784	0.722642	-0.275835	0.283885	0.0612646	0.815312	-0.376015	0.136886	0.608437	0.00955068	-0.561536	0.0189957	-0.37911	0.133424	0.387197	0.124667	-0.133949	0.608275
ENSRNOG00000018994	Psmc4	117262	blue	0.609632	0.00937214	-0.846866	1.8e-05	-0.800537	0.000113336	-0.676487	0.00286414	-0.469202	0.0574262	0.676542	0.00286101	0.322666	0.206529	0.625374	0.0072589	-0.240422	0.352622	-0.128088	0.624189	-0.0343406	0.8959	-0.249908	0.333354	-0.0186527	0.943354	0.291856	0.25568	0.454452	0.0668563	-0.378132	0.134512	-0.222561	0.390566
ENSRNOG00000029134	Adgrl1	65096	blue	-0.60923	0.0094318	0.919652	1.78e-07	0.858026	1.06e-05	0.576095	0.0155065	0.596586	0.011472	-0.467585	0.0584086	-0.512564	0.0353967	-0.612074	0.00901559	0.291171	0.256849	0.0468053	0.858424	0.181718	0.485166	0.0876025	0.738134	0.226623	0.381748	-0.369141	0.144795	-0.410782	0.101435	0.287451	0.263254	0.0282537	0.914281
ENSRNOG00000012343	Pdp2	246311	blue	0.609132	0.00944644	-0.794414	0.00013949	-0.814156	6.96e-05	-0.609145	0.00944449	-0.705143	0.00156892	0.463114	0.0611899	0.60467	0.0101312	0.672909	0.00307396	-0.431719	0.0835546	-0.0397808	0.879513	0.0473418	0.856817	-0.236705	0.360341	-0.185191	0.476716	0.525791	0.0301759	0.637733	0.00588348	-0.41476	0.0978453	0.111399	0.670359
ENSRNOG00000023781	Plec	64204	blue	-0.607529	0.0096881	0.894161	1.3e-06	0.682964	0.00251402	0.372563	0.140819	0.4434	0.0746353	-0.355086	0.161928	-0.405607	0.106246	-0.316544	0.215764	0.0141695	0.956955	-0.0829178	0.751712	0.197508	0.447345	-0.155322	0.551669	0.394968	0.116638	-0.317174	0.214802	-0.39932	0.112305	0.286539	0.26484	0.146051	0.575937
ENSRNOG00000013532	Pgam2	24959	blue	-0.607173	0.00974232	0.90323	6.83e-07	0.84404	2.05e-05	0.556665	0.0202906	0.656242	0.00422306	-0.417622	0.095319	-0.535546	0.026721	-0.542374	0.0244906	0.31323	0.220873	0.071861	0.784026	0.155321	0.551671	0.0610111	0.816064	0.280454	0.275567	-0.3732	0.140088	-0.520169	0.0323174	0.171271	0.511012	0.00433252	0.986833
ENSRNOG00000010083	Prpsap1	64390	blue	0.606896	0.00978489	-0.820649	5.44e-05	-0.824841	4.61e-05	-0.646656	0.00502749	-0.619819	0.0079558	0.49163	0.0450343	0.426704	0.0876124	0.598596	0.0111261	-0.350775	0.167446	-0.0721305	0.783234	-0.0697879	0.790124	-0.251648	0.329888	-0.100753	0.70042	0.383986	0.128095	0.608282	0.00957391	-0.415668	0.0970383	-0.095319	0.715929
ENSRNOG00000024322	Shroom2	317435	blue	-0.606257	0.00988334	0.761079	0.000387628	0.62735	0.00702319	0.632976	0.00638552	0.330999	0.194376	-0.574072	0.0159584	-0.112624	0.66693	-0.261487	0.310679	0.117028	0.654653	0.170471	0.513017	0.0687954	0.793048	0.241198	0.351023	-0.0417462	0.873604	-0.120049	0.646279	-0.343911	0.176491	0.0458345	0.861334	0.478844	0.0518221
ENSRNOG00000013774	Lmnb1	116685	blue	-0.606147	0.00990029	0.692749	0.00205195	0.561647	0.0189668	0.322911	0.206164	0.442648	0.0751872	-0.215569	0.406002	-0.463586	0.0608919	-0.238405	0.356799	0.14158	0.587798	0.08738	0.738777	0.18755	0.471019	-0.147232	0.572822	0.377209	0.135544	-0.265002	0.303981	-0.245161	0.342919	-0.10281	0.694578	0.0305765	0.907261
ENSRNOG00000005358	Pmm1	300089	blue	0.605954	0.0099303	-0.777463	0.000239615	-0.723428	0.00102986	-0.628724	0.00686298	-0.420141	0.0931345	0.626527	0.00712061	0.311678	0.223292	0.59279	0.0121482	-0.219466	0.39736	-0.06277	0.81085	0.00406789	0.987638	-0.278462	0.279135	0.0188983	0.94261	0.323651	0.205067	0.39037	0.121344	-0.463083	0.0612094	-0.205328	0.429188
ENSRNOG00000020438	Prpf38b	499691	blue	0.60594	0.00993245	-0.824946	4.59e-05	-0.67579	0.00290408	-0.361633	0.153785	-0.485616	0.0481377	0.106974	0.682801	0.471234	0.0562096	0.325022	0.203043	-0.143794	0.581914	0.0610647	0.815905	-0.548962	0.0224782	0.191638	0.461225	-0.379837	0.132621	0.103662	0.69216	0.0491554	0.851388	-0.0300189	0.908946	0.168469	0.518052
ENSRNOG00000018047	Gorasp1	56082	blue	-0.604918	0.0100921	0.944457	1.2e-08	0.726544	0.000955521	0.333138	0.191334	0.567451	0.0175109	-0.273303	0.288507	-0.633678	0.00630934	-0.395924	0.115677	0.100956	0.699841	-0.154157	0.554693	0.160026	0.539531	-0.230905	0.372572	0.542413	0.0244783	-0.467154	0.0586728	-0.42191	0.0916225	0.254109	0.325019	-0.0916286	0.726523
ENSRNOG00000023520	Cs	170587	blue	-0.604859	0.0101014	0.840451	2.4e-05	0.57641	0.015437	0.350842	0.16736	0.36986	0.143953	-0.335375	0.188187	-0.340951	0.180491	-0.205657	0.428431	-0.0473238	0.856871	-0.136809	0.600566	0.131073	0.616064	-0.132354	0.61259	0.338547	0.183782	-0.269273	0.29596	-0.343045	0.177655	0.246741	0.339717	0.186605	0.473297
ENSRNOG00000006500	Snf8	287645	blue	0.603853	0.0102608	-0.729433	0.000890587	-0.299517	0.242834	-0.173795	0.504708	-0.00126745	0.996148	0.0779939	0.766057	0.163458	0.530752	-0.0902446	0.730508	0.371591	0.141941	0.380587	0.131794	-0.380406	0.131994	0.325491	0.202354	-0.320119	0.210339	0.207974	0.423133	0.118714	0.649974	-0.387226	0.124637	-0.22174	0.392363
ENSRNOG00000000572	Chst3	84468	blue	-0.603534	0.0103116	0.61615	0.0084446	0.382741	0.129441	0.451201	0.0690793	0.0147299	0.955255	-0.221085	0.393798	0.129395	0.620626	0.0411915	0.875271	-0.13417	0.607679	0.0161783	0.950859	0.569979	0.0169048	0.0667589	0.799054	-0.127092	0.626912	0.20323	0.434021	0.157013	0.547291	-0.0187138	0.943169	0.503181	0.0394992
ENSRNOG00000015644	Ugcg	83626	blue	-0.602663	0.0104518	0.728257	0.000916562	0.368984	0.144979	0.136077	0.602536	0.207517	0.424175	-0.0723475	0.782597	-0.401407	0.110267	0.00730042	0.977815	-0.210161	0.418161	-0.257085	0.31919	0.191885	0.460638	-0.387086	0.124785	0.503992	0.0391312	-0.389341	0.122415	-0.323227	0.205695	0.187419	0.471334	0.103687	0.692091
ENSRNOG00000000073	Tmed5	289883	blue	0.60191	0.0105741	-0.664075	0.00364606	-0.369009	0.144949	-0.108784	0.677703	-0.349774	0.168745	0.136128	0.602399	0.514264	0.0346896	0.0546028	0.83512	0.113799	0.663647	0.206729	0.425975	-0.0433854	0.868681	0.359551	0.156344	-0.61972	0.00796864	0.439465	0.0775584	0.388343	0.12346	-0.218026	0.400542	0.135643	0.603705
ENSRNOG00000010258	Vhl	24874	blue	-0.601352	0.0106654	0.876276	3.98e-06	0.756559	0.000439777	0.628639	0.00687282	0.446831	0.0721525	-0.572473	0.016323	-0.326227	0.201276	-0.463592	0.0608882	0.193245	0.457405	0.108303	0.679057	0.0768681	0.769348	0.158587	0.543233	0.0884924	0.735563	-0.264034	0.305817	-0.382447	0.129761	0.147841	0.571216	0.282345	0.272205
ENSRNOG00000027332	Gemin6	362688	blue	-0.600031	0.0108843	0.872913	4.82e-06	0.747863	0.000556577	0.495439	0.043148	0.556018	0.0204677	-0.332635	0.192046	-0.499251	0.0413208	-0.400862	0.110797	0.233092	0.367933	0.0489021	0.852146	0.178279	0.493604	-0.0338884	0.897264	0.310704	0.224819	-0.295832	0.248962	-0.391213	0.120471	0.00157725	0.995207	0.0266502	0.91913
ENSRNOG00000056659	Mecp2	29386	blue	-0.599713	0.0109375	0.912713	3.24e-07	0.806507	9.19e-05	0.508462	0.0371484	0.596464	0.0114931	-0.515995	0.0339808	-0.5603	0.019318	-0.539763	0.0253258	0.231895	0.370468	0.0720577	0.783448	-0.0194346	0.940983	-0.00556307	0.983094	0.349482	0.169125	-0.479118	0.0516689	-0.566727	0.0176876	0.207269	0.424741	0.102643	0.69505
ENSRNOG00000030569	Olr1163	405166	blue	-0.598351	0.0111678	0.576724	0.0153679	0.686552	0.00233562	0.694014	0.00199766	0.417594	0.0953433	-0.366745	0.147623	-0.074277	0.776935	-0.396502	0.115098	0.420476	0.0928465	0.444364	0.0739316	0.562489	0.01875	0.352244	0.165552	-0.233557	0.366951	0.365	0.149708	0.21697	0.402884	-0.392661	0.118983	0.127543	0.625678
ENSRNOG00000031387	Dazap1	362836	blue	-0.596736	0.0114459	0.929684	6.74e-08	0.69327	0.00202946	0.319565	0.211174	0.46963	0.0571688	-0.286538	0.264841	-0.554515	0.0208838	-0.358827	0.15724	0.032001	0.902959	-0.129607	0.62005	0.208183	0.422656	-0.256644	0.320049	0.500488	0.0407408	-0.418285	0.0947405	-0.363646	0.151339	0.224085	0.387246	0.00373834	0.988639
ENSRNOG00000000903	Asl	59085	blue	0.596686	0.0114545	-0.662685	0.00374348	-0.69774	0.00184459	-0.716696	0.00120691	-0.345767	0.174014	0.787426	0.000175356	0.183578	0.48063	0.603941	0.0102467	-0.283551	0.270074	-0.343913	0.176488	0.0552036	0.83333	-0.399224	0.112399	0.165383	0.525855	0.181857	0.484825	0.282286	0.27231	-0.200165	0.441132	-0.334552	0.18934
ENSRNOG00000002229	Adcy5	64532	blue	-0.596569	0.0114748	0.876719	3.88e-06	0.828891	3.92e-05	0.510986	0.0360628	0.679865	0.0026769	-0.330158	0.195581	-0.522193	0.0315334	-0.478685	0.0519108	0.325017	0.203051	0.098586	0.706591	0.292493	0.254595	0.0139457	0.957635	0.323901	0.204696	-0.245661	0.341905	-0.357908	0.158383	0.0340899	0.896656	-0.0606083	0.817259
ENSRNOG00000004793	Ncln	314648	blue	-0.596171	0.0115445	0.732659	0.000822449	0.514286	0.0346805	0.374227	0.138914	0.303928	0.235626	-0.0104613	0.968214	-0.206549	0.426387	-0.0582207	0.82435	0.0185269	0.943736	-0.100764	0.700388	0.647572	0.00494571	-0.120009	0.646388	0.181612	0.485424	0.105162	0.687916	0.0630837	0.809921	-0.0875101	0.738401	0.061915	0.813384
ENSRNOG00000012812	Sharpin	81859	blue	0.595375	0.0116844	-0.908809	4.45e-07	-0.861369	8.93e-06	-0.506726	0.0379089	-0.705773	0.00154712	0.396898	0.114702	0.692517	0.00206203	0.658104	0.00407964	-0.346218	0.173416	0.00538551	0.983634	-0.0805551	0.758586	0.00737993	0.977574	-0.397241	0.11436	0.509304	0.0367836	0.575676	0.0155992	-0.319806	0.21081	0.216941	0.402949
ENSRNOG00000027867	Rexo4	311826	blue	-0.59529	0.0116994	0.928423	7.67e-08	0.770053	0.000299265	0.504322	0.0389821	0.46722	0.0586325	-0.404323	0.107464	-0.422192	0.0913829	-0.442441	0.0753401	0.136502	0.601394	0.00995555	0.96975	0.246978	0.339239	-0.0541512	0.836467	0.265308	0.303402	-0.267109	0.300007	-0.354186	0.163069	0.141813	0.587179	0.119892	0.646713
ENSRNOG00000004650	Begain	79146	blue	-0.59518	0.0117189	0.865001	7.4e-06	0.872395	4.96e-06	0.510818	0.0361344	0.748557	0.000546402	-0.444303	0.0739756	-0.686996	0.0023143	-0.691087	0.00212511	0.40588	0.105988	0.0783978	0.764878	0.0189201	0.942543	0.0574839	0.826541	0.36634	0.148106	-0.500962	0.0405203	-0.544472	0.0238353	0.287229	0.263639	-0.157607	0.545757
ENSRNOG00000006019	G0s2	289388	blue	0.594272	0.0118805	-0.812966	7.27e-05	-0.613695	0.00878493	-0.287368	0.263398	-0.442067	0.075616	0.473929	0.0546253	0.641135	0.0055443	0.482064	0.0500448	-0.0432366	0.869128	0.0650861	0.803996	0.169324	0.515898	0.219952	0.396288	-0.513458	0.0350234	0.609035	0.009461	0.491387	0.0451567	-0.351218	0.166874	0.00164816	0.994991
ENSRNOG00000051180	LOC100911516	316643	blue	0.593001	0.0121098	-0.769491	0.000304255	-0.529365	0.0288724	-0.421229	0.0922024	-0.168154	0.518846	0.55439	0.0209187	0.244121	0.345035	0.343467	0.177087	0.0918542	0.725874	0.0362341	0.890192	-0.0398636	0.879265	0.0393969	0.880668	-0.156707	0.548083	0.248457	0.33626	0.194618	0.454152	-0.325699	0.202049	-0.266821	0.300549
ENSRNOG00000014205	Klf2	306330	blue	-0.592975	0.0121145	0.652613	0.00451428	0.555137	0.0207107	0.28439	0.268597	0.649689	0.00476064	-0.0753414	0.773816	-0.600414	0.0108206	-0.208614	0.421675	0.263164	0.307472	-0.0134498	0.95914	0.157209	0.546785	-0.104903	0.688648	0.481006	0.0506237	-0.338427	0.183947	-0.358267	0.157936	-0.050292	0.847989	-0.248234	0.336709
ENSRNOG00000022288	Pafah2	313611	blue	-0.592818	0.0121432	0.914558	2.78e-07	0.629083	0.00682164	0.396425	0.115174	0.313693	0.220155	-0.250032	0.333106	-0.37272	0.140639	-0.258879	0.315705	-0.0387891	0.882497	-0.185725	0.475424	0.325951	0.20168	-0.173057	0.506547	0.302251	0.238349	-0.264238	0.305431	-0.252955	0.327297	0.208244	0.422516	0.109854	0.674695
ENSRNOG00000016433	Prrc1	291444	blue	-0.592763	0.0121531	0.746633	0.000575014	0.692688	0.00205459	0.596843	0.0114272	0.373045	0.140266	-0.349817	0.168689	-0.094607	0.717969	-0.273324	0.28847	0.207714	0.423726	0.254799	0.323662	0.534828	0.0269645	0.151345	0.562023	-0.04102	0.875787	0.205752	0.428213	0.0505106	0.847336	-0.23853	0.356539	0.294955	0.250434
ENSRNOG00000003772	Csrp2	29317	blue	0.592559	0.0121903	-0.854329	1.27e-05	-0.831119	3.58e-05	-0.587491	0.0131448	-0.579702	0.0147255	0.582954	0.0140482	0.560418	0.0192869	0.717188	0.00119318	-0.308701	0.22798	-0.0687824	0.793086	0.0735853	0.778963	-0.140754	0.590001	-0.203401	0.433626	0.565195	0.0180661	0.656128	0.00423194	-0.46273	0.0614336	-0.0440865	0.866577
ENSRNOG00000018111	Slc12a5	171373	blue	-0.591852	0.0123202	0.951877	4.18e-09	0.755528	0.000452452	0.351487	0.166526	0.559366	0.0195642	-0.346306	0.173299	-0.650261	0.00471159	-0.498852	0.0415095	0.101255	0.698991	-0.168442	0.51812	0.0655308	0.802682	-0.204468	0.431166	0.516392	0.0338197	-0.570661	0.0167442	-0.56133	0.0190491	0.426286	0.0879571	-0.060759	0.816812
ENSRNOG00000025181	Pigu	353304	blue	-0.591456	0.0123933	0.79901	0.000119438	0.581486	0.0143508	0.302422	0.238071	0.432043	0.0832976	-0.316713	0.215506	-0.534511	0.0270723	-0.281535	0.273641	0.0482037	0.854236	-0.00897946	0.972715	0.0771496	0.768525	-0.255671	0.321951	0.500228	0.0408622	-0.342935	0.177803	-0.322739	0.20642	-0.0005998	0.998177	-0.0308584	0.90641
ENSRNOG00000019807	Sufu	361769	blue	-0.591298	0.0124226	0.848603	1.66e-05	0.747672	0.000559411	0.531677	0.0280527	0.480843	0.0507133	-0.215204	0.406816	-0.378254	0.134376	-0.410053	0.102104	0.235922	0.361978	-0.0401824	0.878306	0.456966	0.065173	0.0635456	0.808553	0.135799	0.603286	-0.154299	0.554324	-0.168726	0.517405	0.146123	0.575746	-0.00709962	0.978426
ENSRNOG00000043233	Cyp4f6	266689	blue	0.590759	0.0125228	-0.829259	3.86e-05	-0.731177	0.000853195	-0.405327	0.106511	-0.69908	0.00179195	0.247492	0.338202	0.694968	0.00195751	0.454136	0.0670699	-0.284821	0.267842	0.0781439	0.765619	-0.0397032	0.879747	0.0708416	0.787023	-0.480782	0.0507468	0.574496	0.0158628	0.65665	0.00419128	-0.276969	0.281829	0.179658	0.49021
ENSRNOG00000018349	Polr1b	83582	blue	0.590483	0.0125744	-0.483429	0.0493054	-0.455555	0.0661138	-0.558901	0.0196878	-0.196294	0.450197	0.148376	0.569809	-0.108546	0.678371	0.078315	0.76512	-0.169287	0.515993	-0.153744	0.555769	-0.588067	0.0130334	-0.291545	0.256211	0.250516	0.33214	-0.335355	0.188214	-0.168511	0.517947	0.090408	0.730037	-0.244275	0.344722
ENSRNOG00000002863	Cacna1e	54234	blue	-0.590091	0.0126481	0.754949	0.000459702	0.738248	0.000714633	0.667567	0.00341044	0.461287	0.0623545	-0.382177	0.130055	-0.195236	0.452693	-0.429742	0.0851374	0.282639	0.271684	0.141478	0.588071	0.400678	0.110976	0.25506	0.32315	-0.0724087	0.782417	-0.00986834	0.970015	-0.228201	0.378352	0.1116	0.669798	0.220759	0.394514
ENSRNOG00000000699	Selplg	363930	blue	-0.589612	0.0127383	0.91663	2.32e-07	0.742921	0.000633724	0.465368	0.0597762	0.50243	0.0398427	-0.511944	0.0356573	-0.516578	0.0337447	-0.466109	0.0593166	0.129191	0.621182	0.0119273	0.963762	-0.029481	0.910571	-0.0699502	0.789646	0.36576	0.148797	-0.447275	0.0718355	-0.511518	0.0358374	0.205042	0.429845	0.117165	0.654272
ENSRNOG00000012081	Txn1	116484	blue	0.589151	0.0128258	-0.807904	8.74e-05	-0.874047	4.52e-06	-0.65042	0.00469805	-0.704508	0.00159113	0.622065	0.00766789	0.601102	0.0107067	0.757128	0.000432903	-0.488982	0.0463816	-0.282192	0.272476	0.0340676	0.896723	-0.209166	0.420418	-0.190383	0.46422	0.351605	0.166374	0.397937	0.113669	-0.0628307	0.81067	0.0814768	0.755902
ENSRNOG00000024743	L3mbtl2	300320	blue	-0.589119	0.0128318	0.869457	5.83e-06	0.572106	0.0164077	0.299574	0.24274	0.312856	0.221455	-0.273545	0.288064	-0.374646	0.138437	-0.197758	0.446758	-0.101716	0.697682	-0.135891	0.603037	0.284064	0.269171	-0.268061	0.298223	0.407327	0.104629	-0.247266	0.338658	-0.228285	0.378172	0.140105	0.591734	0.14283	0.584473
ENSRNOG00000000480	Phf1	294287	blue	-0.589111	0.0128335	0.926281	9.51e-08	0.814797	6.79e-05	0.471403	0.0561092	0.625446	0.00725025	-0.444812	0.0736058	-0.592791	0.0121481	-0.527321	0.0296124	0.237639	0.358392	0.0252789	0.92328	0.0671225	0.797981	-0.0467889	0.858473	0.406209	0.105678	-0.453175	0.0677227	-0.489547	0.0460917	0.209686	0.419238	-0.00858602	0.97391
ENSRNOG00000050424	Nme4	64461	blue	0.585654	0.0135048	-0.852788	1.36e-05	-0.63622	0.00603953	-0.49988	0.0410252	-0.31206	0.222695	0.483268	0.049392	0.247645	0.337895	0.323393	0.205449	0.00487607	0.985182	0.075583	0.773108	-0.137737	0.598074	-0.0335123	0.898398	-0.160525	0.53825	0.258211	0.317	0.354804	0.162286	-0.363575	0.151424	-0.257385	0.318605
ENSRNOG00000011029	Sec11a	65166	blue	0.585598	0.013516	-0.875323	4.2e-06	-0.521721	0.031715	-0.276252	0.283127	-0.297654	0.24592	0.194366	0.454747	0.371822	0.141674	0.146198	0.575549	0.156218	0.549349	0.348509	0.170397	-0.248262	0.336653	0.239099	0.355359	-0.403847	0.107918	0.330707	0.194793	0.300442	0.24131	-0.415508	0.0971801	-0.0793227	0.762179
ENSRNOG00000012503	Dnajc16	362652	blue	-0.585589	0.0135177	0.775567	0.000253838	0.508809	0.0369977	0.250109	0.332953	0.382034	0.130211	0.1199	0.646689	-0.390933	0.120761	-0.0304767	0.907563	-0.00494747	0.984965	-0.249347	0.334476	0.597592	0.0112978	-0.277458	0.280944	0.419138	0.0939997	-0.110452	0.673015	-0.0726714	0.781646	0.03025	0.908248	-0.112272	0.667917
ENSRNOG00000038616	Cox6b2	654441	blue	0.58489	0.0136568	-0.904092	6.4e-07	-0.733624	0.000802929	-0.408803	0.103257	-0.591907	0.0123099	0.381228	0.131092	0.67024	0.00323852	0.494272	0.0437196	-0.177707	0.495014	0.0877068	0.737832	-0.0176708	0.946332	0.13697	0.600134	-0.485168	0.0483751	0.537413	0.0260963	0.53331	0.0274847	-0.266843	0.300508	0.133512	0.609455
ENSRNOG00000037607	Rplp2	140662	blue	0.583752	0.0138858	-0.86242	8.46e-06	-0.8769	3.84e-06	-0.65976	0.00395539	-0.657838	0.00409983	0.47152	0.0560397	0.480653	0.0508176	0.606065	0.00991308	-0.431632	0.0836245	-0.215708	0.405693	-0.211727	0.41462	-0.175632	0.500146	-0.149184	0.567687	0.181802	0.48496	0.299015	0.243663	0.0373517	0.886825	0.0188594	0.942728
ENSRNOG00000045998	Sema6b	84609	blue	-0.58132	0.0143853	0.886182	2.19e-06	0.803951	0.000100635	0.452966	0.0678653	0.645778	0.00510703	-0.368276	0.145812	-0.620939	0.00781114	-0.556265	0.0204001	0.273206	0.288685	-0.0362934	0.890013	0.0604139	0.817836	-0.0165423	0.949755	0.381648	0.130632	-0.512608	0.0353784	-0.548539	0.0226035	0.331209	0.194075	-0.0659674	0.801392
ENSRNOG00000000398	Zup1	294390	blue	0.581275	0.0143947	-0.64869	0.00484722	-0.754747	0.000462253	-0.716755	0.00120527	-0.552648	0.0214098	0.287491	0.263185	0.167589	0.520273	0.445603	0.0730337	-0.461644	0.0621255	-0.23359	0.366882	-0.542704	0.0243868	-0.413765	0.0987352	0.185759	0.475342	-0.138949	0.594827	0.0887082	0.734939	0.0128636	0.96092	-0.0173853	0.947198
ENSRNOG00000003512	Gabra1	29705	blue	-0.581061	0.0144395	0.616298	0.0084245	0.177738	0.494937	-0.0199647	0.939377	0.0362282	0.890209	0.0610452	0.815963	-0.350562	0.167723	0.137092	0.599806	-0.389584	0.122162	-0.431206	0.0839636	0.300031	0.241986	-0.513702	0.0349223	0.557555	0.020049	-0.350686	0.167562	-0.138085	0.597142	0.357039	0.159469	-0.0425386	0.871224
ENSRNOG00000012878	Atp7b	24218	blue	-0.580979	0.0144566	0.694264	0.00198709	0.712913	0.00131693	0.421655	0.0918387	0.71908	0.00114155	-0.38404	0.128038	-0.633319	0.00634826	-0.492805	0.0444458	0.396298	0.115302	0.259961	0.313615	0.102215	0.696265	-0.0252661	0.923319	0.43301	0.0825327	-0.24896	0.335251	-0.262792	0.308182	-0.175794	0.499743	-0.24965	0.33387
ENSRNOG00000047374	Gnas	24896	blue	0.580142	0.0146323	-0.669439	0.00328924	-0.724131	0.00101269	-0.6104	0.00925873	-0.439569	0.0774796	0.295717	0.249155	0.198134	0.445877	0.44572	0.0729499	-0.334105	0.189969	-0.20204	0.436774	-0.486557	0.0476417	-0.249162	0.334847	0.0776793	0.766977	-0.0155839	0.952663	0.127041	0.627049	-0.0713337	0.785576	-0.0979325	0.708456
ENSRNOG00000022239	Trarg1	360576	blue	0.578899	0.0148965	-0.651326	0.00462139	-0.605745	0.00996266	-0.617057	0.0083216	-0.245242	0.342755	0.494573	0.0435713	0.117157	0.654294	0.362218	0.153071	-0.166059	0.524142	-0.275294	0.284869	-0.253477	0.326265	-0.194071	0.455446	0.0999805	0.702617	0.0363571	0.889821	0.196924	0.448717	0.0441822	0.86629	-0.342589	0.17827
ENSRNOG00000006623	Cd302	295629	blue	0.578657	0.0149485	-0.677282	0.00281916	-0.387222	0.124641	-0.360715	0.15491	-0.0833192	0.750546	0.486969	0.0474257	0.116746	0.655436	0.114915	0.660534	0.201042	0.439091	0.101789	0.697474	0.102343	0.695902	0.00919097	0.972072	-0.121936	0.641068	0.34162	0.179581	0.410613	0.10159	-0.406376	0.105521	-0.500585	0.0406955
ENSRNOG00000008039	Cul5	64624	blue	-0.578516	0.0149787	0.676697	0.00285217	0.551546	0.021725	0.497372	0.0422141	0.371174	0.142424	-0.115582	0.658675	-0.266183	0.301751	-0.186682	0.473111	0.180452	0.488263	0.0120713	0.963325	0.498133	0.0418504	0.0627496	0.810911	0.078123	0.76568	-0.0275294	0.916471	-0.0671471	0.797908	-0.0871526	0.739435	0.0400856	0.878597
ENSRNOG00000019953	Ube2f	363284	blue	0.577727	0.0151492	-0.786224	0.000182242	-0.677799	0.00279019	-0.456795	0.0652869	-0.523706	0.0309569	0.253458	0.326303	0.384	0.12808	0.341006	0.180416	-0.165888	0.524574	0.0790107	0.763089	-0.284885	0.267729	-0.0342024	0.896317	-0.250514	0.332145	0.311926	0.222904	0.46584	0.0594826	-0.356186	0.16054	-0.0414563	0.874476
ENSRNOG00000043053	Zfp639	683504	blue	0.577726	0.0151493	-0.799835	0.000116107	-0.656753	0.00418325	-0.516365	0.0338308	-0.384505	0.127537	0.61626	0.00842968	0.366069	0.148429	0.511514	0.0358389	-0.0898236	0.731721	0.033291	0.899066	0.0849457	0.745825	-0.116888	0.655041	-0.154993	0.552523	0.42596	0.0882261	0.466283	0.0592088	-0.517786	0.0332593	-0.176032	0.499154
ENSRNOG00000020922	Hspb6	192245	blue	0.575693	0.0155956	-0.745834	0.000587257	-0.696492	0.00189475	-0.476233	0.0532973	-0.694721	0.00196786	0.502013	0.0400341	0.595489	0.0116643	0.478353	0.052097	-0.31084	0.224606	-0.0752414	0.774109	0.230326	0.373806	-0.101383	0.698627	-0.372409	0.140997	0.558538	0.0197848	0.7195	0.00113035	-0.271619	0.291607	0.0244	0.92594
ENSRNOG00000028225	Tnni3k	295531	blue	-0.575593	0.0156176	0.516676	0.0337051	0.416208	0.0965617	0.369767	0.144062	0.369804	0.144019	-0.214383	0.408653	-0.212061	0.413867	-0.0973298	0.710177	0.139266	0.593978	0.090754	0.72904	0.317206	0.214753	0.0597546	0.819793	0.163678	0.530192	0.0994596	0.704101	0.0936011	0.720854	-0.121069	0.643459	-0.0763638	0.770823
ENSRNOG00000007727	Lhfpl4	353230	blue	-0.57555	0.0156273	0.870057	5.64e-06	0.8018	0.000108487	0.494204	0.043753	0.589866	0.0126903	-0.478514	0.0520066	-0.556906	0.0202251	-0.605243	0.0100411	0.253972	0.325289	0.0108373	0.967072	-0.00270747	0.991772	0.0458321	0.861341	0.29163	0.256065	-0.513953	0.0348183	-0.566186	0.0178205	0.388624	0.123165	0.0531595	0.839425
ENSRNOG00000001480	Ncf1	114553	blue	-0.574481	0.0158664	0.743764	0.000619965	0.4988	0.0415341	0.416828	0.0960149	0.190305	0.464409	-0.439224	0.07774	-0.156729	0.548026	-0.120304	0.645573	-0.072601	0.781852	0.0947277	0.717623	0.159346	0.54128	-0.0710647	0.786367	0.17304	0.506591	-0.0844685	0.747209	-0.14343	0.582878	-0.097942	0.708429	0.391114	0.120574
ENSRNOG00000006593	Grpel1	79563	blue	0.574409	0.0158825	-0.795893	0.000132752	-0.737893	0.000721111	-0.688649	0.00223627	-0.3992	0.112422	0.647841	0.00492184	0.199346	0.443042	0.52845	0.0292021	-0.211163	0.415894	-0.151661	0.5612	-0.128041	0.62432	-0.28774	0.262753	0.0751547	0.774363	0.124888	0.632949	0.272978	0.289104	-0.252146	0.328899	-0.314072	0.219568
ENSRNOG00000012826	Creb3l2	362339	blue	-0.574366	0.0158921	0.850606	1.51e-05	0.611225	0.00913826	0.498667	0.0415971	0.24747	0.338247	-0.366716	0.147658	-0.121345	0.642699	-0.18464	0.478052	-0.0374478	0.886535	-0.0393425	0.880832	0.382916	0.129252	0.0162048	0.950779	0.0840453	0.748437	-0.045957	0.860966	-0.113528	0.664403	0.121776	0.641509	0.385168	0.126826
ENSRNOG00000009236	Necap1	312694	blue	-0.573442	0.0161013	0.758612	0.000415415	0.46106	0.0624999	0.311884	0.22297	0.31188	0.222976	-0.174588	0.502735	-0.27537	0.284731	-0.0501182	0.848508	-0.0956402	0.715009	-0.255064	0.323141	0.234119	0.365766	-0.126187	0.629389	0.321506	0.208257	-0.229033	0.376569	-0.282495	0.27194	0.306705	0.231157	0.132666	0.611743
ENSRNOG00000004505	Nfic	29228	blue	-0.573376	0.0161165	0.926742	9.08e-08	0.767685	0.000320754	0.529719	0.0287458	0.376228	0.136647	-0.46667	0.0589702	-0.308842	0.227757	-0.481319	0.0504516	0.0810965	0.757009	-0.0281085	0.91472	0.281193	0.27425	0.0201811	0.938721	0.138904	0.594948	-0.232432	0.369331	-0.290996	0.257148	0.318974	0.212067	0.230605	0.373211
ENSRNOG00000006649	Thrb	24831	blue	-0.572761	0.0162569	0.817744	6.08e-05	0.759327	0.000407189	0.357123	0.159364	0.711897	0.00134785	-0.441965	0.0756919	-0.753444	0.00047901	-0.588317	0.0129852	0.28816	0.262025	0.0812734	0.756494	-0.0897777	0.731854	-0.145496	0.577405	0.572543	0.016307	-0.544235	0.0239087	-0.547194	0.0230053	0.176068	0.499064	-0.199823	0.441929
ENSRNOG00000005256	Zc3h15	362154	blue	0.571221	0.0166131	-0.854704	1.24e-05	-0.65897	0.00401425	-0.510656	0.0362034	-0.230262	0.373943	0.353022	0.164554	0.129503	0.620334	0.313941	0.219771	0.0258272	0.92162	0.0723141	0.782695	-0.470898	0.0564095	-0.0193025	0.941384	-0.0365944	0.889106	0.0745066	0.776262	0.168763	0.51731	-0.30876	0.227887	-0.31432	0.219184
ENSRNOG00000050767	Nrn1	83834	blue	-0.571091	0.0166435	0.747889	0.000556192	0.785573	0.000186063	0.59904	0.0110509	0.636657	0.00599413	-0.263872	0.306125	-0.41984	0.093394	-0.489301	0.0462173	0.4328	0.0826987	0.0869019	0.74016	0.285983	0.265808	0.244561	0.344139	0.0848525	0.746096	-0.22381	0.387845	-0.367049	0.147262	0.146888	0.573727	-0.086616	0.740987
ENSRNOG00000002175	Clock	60447	blue	-0.570991	0.0166668	0.773357	0.0002713	0.592986	0.0121125	0.575324	0.0156775	0.17904	0.491729	-0.430449	0.0845693	0.0113058	0.965649	-0.188859	0.467871	-0.0206881	0.937184	0.0874843	0.738475	0.394217	0.117398	0.122328	0.639987	-0.0777661	0.766723	0.0213102	0.935299	-0.169828	0.514631	0.0832366	0.750786	0.540037	0.0252371
ENSRNOG00000008965	Socs2	84607	blue	-0.570814	0.0167081	0.840299	2.42e-05	0.656128	0.00423198	0.377108	0.135657	0.486076	0.0478948	-0.336995	0.185929	-0.520551	0.0321682	-0.317017	0.215042	0.11964	0.647409	0.0158706	0.951793	0.0875389	0.738318	-0.164357	0.528462	0.442333	0.0754195	-0.36299	0.152133	-0.397005	0.114596	0.00208413	0.993666	0.0036225	0.988991
ENSRNOG00000038148	Defb10	641635	blue	-0.570754	0.0167222	0.536433	0.0264229	0.15648	0.54867	0.0536179	0.838057	0.0989994	0.705413	-0.0704131	0.788284	-0.321222	0.208683	0.13918	0.594207	-0.264381	0.305158	-0.313132	0.221025	-0.00905407	0.972488	-0.313006	0.221222	0.442612	0.0752135	-0.338144	0.184338	-0.191456	0.461659	0.220696	0.394653	0.0128318	0.961016
ENSRNOG00000026432	Syt7	59267	blue	-0.570619	0.0167539	0.907493	4.93e-07	0.676459	0.00286573	0.42207	0.0914859	0.339655	0.182259	-0.17658	0.497796	-0.316483	0.215857	-0.303838	0.235771	0.00517801	0.984264	-0.22083	0.394358	0.484137	0.0489249	-0.098183	0.707741	0.208135	0.422764	-0.216249	0.404487	-0.236973	0.359782	0.339338	0.182695	0.117868	0.652321
ENSRNOG00000009726	Grip2	171571	blue	-0.568664	0.0172179	0.815162	6.7e-05	0.492546	0.0445749	0.140324	0.591149	0.302378	0.238143	-0.130139	0.618601	-0.490434	0.0456388	-0.167138	0.521411	-0.159262	0.541494	-0.28079	0.274967	0.276091	0.283419	-0.410385	0.101799	0.583503	0.0139363	-0.395519	0.116083	-0.238514	0.356573	0.32799	0.198709	-0.0494688	0.850451
ENSRNOG00000017887	Mutyh	170841	blue	0.568264	0.0173141	-0.803871	0.00010092	-0.738291	0.00071384	-0.546405	0.0232433	-0.507471	0.037581	0.306605	0.231318	0.359051	0.156962	0.413644	0.0988433	-0.275101	0.285219	-0.0451652	0.86334	-0.335575	0.187907	-0.128556	0.622913	-0.12114	0.643262	0.146665	0.574317	0.207034	0.425277	-0.0853718	0.74459	0.0197012	0.940175
ENSRNOG00000016484	Gstk1	297029	blue	0.567021	0.0176155	-0.766947	0.000327713	-0.614448	0.00867946	-0.498838	0.041516	-0.21042	0.417574	0.550831	0.0219312	0.266343	0.30145	0.476011	0.0534244	-0.0140393	0.957351	0.00438179	0.986684	-0.0441089	0.86651	-0.0601325	0.818671	-0.0648395	0.804725	0.367529	0.146693	0.404892	0.106923	-0.450316	0.0696936	-0.264433	0.305059
ENSRNOG00000022329	Olr1595	304990	blue	-0.566759	0.0176796	0.744279	0.000611687	0.661824	0.00380489	0.482617	0.0497441	0.537881	0.0259413	-0.263925	0.306024	-0.405428	0.106415	-0.381582	0.130704	0.220455	0.395182	-0.0833439	0.750474	0.24514	0.342962	0.113826	0.663573	0.193092	0.457768	-0.334713	0.189114	-0.44613	0.0726551	0.378324	0.134298	-0.0416275	0.873961
ENSRNOG00000019981	Sdf4	155173	blue	0.564948	0.0181276	-0.801452	0.000109806	-0.709799	0.00141358	-0.449019	0.0706018	-0.654949	0.00432504	0.338725	0.183537	0.626133	0.00716772	0.478946	0.0517648	-0.275076	0.285265	0.0660778	0.801066	-0.0297404	0.909787	-0.0157461	0.952171	-0.392666	0.118977	0.52081	0.0320672	0.585948	0.0134466	-0.326232	0.201268	0.195766	0.451442
ENSRNOG00000009977	Thrap3	313591	blue	-0.564349	0.0182778	0.777274	0.000241002	0.696677	0.00188724	0.612434	0.00896387	0.296942	0.247105	-0.483714	0.0491517	-0.175031	0.501635	-0.429192	0.0855821	0.170611	0.512665	0.177613	0.495245	0.287035	0.263976	0.167464	0.520588	-0.0704633	0.788136	-0.0521659	0.84239	-0.135096	0.60518	0.00983564	0.970114	0.32926	0.196873
ENSRNOG00000015816	Bbs7	361930	blue	0.564323	0.0182843	-0.695809	0.00192268	-0.689537	0.00219522	-0.558567	0.0197771	-0.539774	0.0253222	0.222509	0.39068	0.385811	0.12614	0.443513	0.0745522	-0.333775	0.190435	0.032025	0.902887	-0.24463	0.343998	-0.229426	0.375729	-0.0534896	0.83844	0.321473	0.208307	0.485524	0.0481865	-0.349534	0.169058	0.0524944	0.84141
ENSRNOG00000006858	Pyurf	502782	blue	0.564302	0.0182896	-0.80996	8.12e-05	-0.723996	0.00101597	-0.536947	0.0262511	-0.391081	0.120608	0.603007	0.0103962	0.379119	0.133415	0.609338	0.00941572	-0.140265	0.591308	-0.0670544	0.798182	-0.112799	0.666442	-0.0848607	0.746072	-0.135402	0.604353	0.343537	0.176994	0.338937	0.183245	-0.408782	0.103276	-0.139644	0.592967
ENSRNOG00000020577	Pip5k1c	314641	blue	-0.563212	0.0185653	0.809581	8.23e-05	0.811637	7.64e-05	0.54259	0.0244225	0.691384	0.0021119	-0.278505	0.279057	-0.577357	0.0152296	-0.597405	0.01133	0.394137	0.11748	-0.0373074	0.886958	0.225465	0.384251	0.120687	0.644514	0.247923	0.337335	-0.38445	0.127596	-0.499441	0.0412315	0.363438	0.15159	-0.247434	0.338319
ENSRNOG00000012356	Slc36a1	155205	blue	-0.562628	0.0187144	0.646108	0.00507698	0.303966	0.235564	0.199627	0.442386	-0.0567396	0.828756	-0.29392	0.252178	-0.0792821	0.762297	0.0046918	0.985742	-0.34083	0.180655	-0.122071	0.640694	0.203794	0.432719	-0.258186	0.317049	0.221603	0.392662	-0.17611	0.49896	-0.149619	0.566544	0.226184	0.382695	0.407781	0.104206
ENSRNOG00000013919	Ift46	300675	blue	0.562252	0.018811	-0.742092	0.000647497	-0.67556	0.00291735	-0.468397	0.0579143	-0.659189	0.0039979	0.48744	0.0471798	0.601716	0.0106059	0.49016	0.0457785	-0.298776	0.244059	-0.0151604	0.953948	0.252863	0.327478	-0.107745	0.680626	-0.350622	0.167644	0.568357	0.0172916	0.684573	0.00243268	-0.321749	0.207894	0.0856657	0.743739
ENSRNOG00000026265	Magec2	317590	blue	-0.561627	0.0189721	0.71583	0.00123141	0.38361	0.128501	0.215835	0.405408	0.185158	0.476795	-0.0722895	0.782767	-0.232123	0.369984	0.022584	0.93144	-0.166749	0.522396	-0.229946	0.374616	0.436215	0.0800351	-0.259956	0.313624	0.328576	0.19786	-0.00821908	0.975025	0.0877476	0.737714	0.044724	0.864664	0.0186649	0.943317
ENSRNOG00000060936	Ikbkg	309295	blue	-0.561377	0.0190369	0.684827	0.00242006	0.765378	0.000342915	0.809827	8.16e-05	0.392181	0.119475	-0.676548	0.00286065	-0.00976274	0.970336	-0.480609	0.0508422	0.359985	0.155808	0.496227	0.0427657	0.28395	0.269371	0.44553	0.0730866	-0.286936	0.264148	0.186698	0.473072	-0.092708	0.723419	-0.21807	0.400445	0.466826	0.0588744
ENSRNOG00000002255	Fam162a	360721	blue	0.56123	0.0190751	-0.791489	0.000153671	-0.478304	0.0521242	-0.356344	0.160341	-0.179222	0.491282	0.48326	0.0493963	0.180784	0.48745	0.108716	0.677893	0.185927	0.474934	0.061713	0.813983	-0.0139123	0.957736	0.11486	0.660686	-0.258496	0.316447	0.277332	0.281172	0.351701	0.166251	-0.213319	0.411038	-0.452617	0.0681043
ENSRNOG00000017340	Wdr12	363237	blue	0.560689	0.0192161	-0.693985	0.00199891	-0.481238	0.0504959	-0.484962	0.0484846	-0.225509	0.384157	0.302322	0.238235	0.100583	0.700903	0.148798	0.5687	0.0065473	0.980104	0.0826529	0.752481	-0.353285	0.164219	-0.0966377	0.712155	-0.00477775	0.98548	-0.0189601	0.942422	0.0345279	0.895335	-0.15721	0.546782	-0.224048	0.387325
ENSRNOG00000001060	Snrnp35	360803	blue	0.560032	0.0193883	-0.685377	0.00239285	-0.651301	0.00462351	-0.443645	0.0744559	-0.497517	0.0421447	0.452539	0.0681579	0.536804	0.0262988	0.57518	0.0157096	-0.252448	0.3283	-0.0971265	0.710758	-0.0473046	0.856928	-0.00187156	0.994312	-0.288572	0.261314	0.328714	0.197661	0.323047	0.205963	-0.215115	0.407015	0.206571	0.426337
ENSRNOG00000016423	Tacc1	306562	blue	-0.559901	0.019423	0.875478	4.16e-06	0.638165	0.00583952	0.349183	0.169516	0.372457	0.140942	-0.507571	0.0375371	-0.517819	0.0332462	-0.433706	0.0819858	-0.0171697	0.947852	-0.0733496	0.779655	-0.0733562	0.779635	-0.19696	0.448632	0.436733	0.079636	-0.518491	0.0329785	-0.469786	0.0570748	0.331273	0.193984	0.132495	0.612207
ENSRNOG00000018526	Dlg4	29495	blue	-0.559199	0.0196085	0.828196	4.03e-05	0.811349	7.72e-05	0.535323	0.0267966	0.584308	0.0137736	-0.305696	0.232775	-0.469038	0.0575257	-0.569958	0.0169097	0.333617	0.190656	0.0122677	0.962729	0.27349	0.288164	0.109495	0.675704	0.162429	0.533376	-0.278988	0.27819	-0.342618	0.178231	0.26267	0.308416	-0.0447493	0.864588
ENSRNOG00000050534	Gcnt1	64043	blue	-0.558812	0.0197117	0.858664	1.02e-05	0.710089	0.00140434	0.474491	0.054299	0.408346	0.103681	-0.18235	0.483622	-0.348378	0.170568	-0.357608	0.158757	0.130331	0.618081	-0.104385	0.690115	0.449751	0.0700882	-0.0388751	0.882239	0.183078	0.481849	-0.193907	0.455833	-0.299226	0.243315	0.210883	0.416526	0.0305468	0.907351
ENSRNOG00000000483	Syngap1	192117	blue	-0.557874	0.0199629	0.95901	1.28e-09	0.811804	7.59e-05	0.514732	0.0344972	0.519353	0.0326375	-0.473044	0.0551417	-0.469635	0.0571653	-0.526831	0.0297919	0.158174	0.544296	-0.0524433	0.841562	0.0943066	0.71883	0.00486732	0.985208	0.270499	0.29368	-0.431778	0.0835079	-0.523378	0.031081	0.355317	0.161635	0.150172	0.565095
ENSRNOG00000022421	Crtc1	684527	blue	-0.557643	0.0200253	0.791726	0.000152476	0.855805	1.18e-05	0.741534	0.000656908	0.566207	0.0178153	-0.714627	0.0012661	-0.324758	0.203432	-0.696242	0.00190495	0.400084	0.111555	0.245386	0.342463	-0.104251	0.690494	0.395419	0.116184	-0.0630615	0.809987	-0.32111	0.208851	-0.584031	0.0138294	0.317793	0.213858	0.262404	0.308924
ENSRNOG00000054775	Arf3	140940	blue	-0.556189	0.0204207	0.850715	1.51e-05	0.834161	3.15e-05	0.600356	0.0108302	0.623784	0.00745322	-0.693336	0.00202664	-0.490248	0.0457336	-0.654198	0.00438516	0.32804	0.198636	0.192092	0.460145	-0.138873	0.59503	0.17098	0.51174	0.217925	0.400765	-0.385031	0.126972	-0.509604	0.0366541	0.224458	0.386435	0.108342	0.678946
ENSRNOG00000003385	Glrx2	114022	blue	0.556125	0.0204384	-0.699719	0.0017673	-0.601062	0.0107133	-0.493695	0.044004	-0.342384	0.178547	0.107797	0.68048	0.200354	0.440692	0.254469	0.32431	-0.178948	0.491955	0.0206055	0.937434	-0.613242	0.0088489	-0.0705557	0.787864	-0.0264626	0.919698	-0.122768	0.638776	-0.0728752	0.781047	0.00597895	0.98183	0.0687232	0.79326
ENSRNOG00000003948	Llgl1	54265	blue	-0.55604	0.0204617	0.732721	0.000821189	0.636698	0.00598994	0.680986	0.00261698	0.255148	0.322976	-0.477174	0.0527618	0.0767607	0.769662	-0.224169	0.387063	0.119441	0.647961	0.176452	0.498115	0.340624	0.180935	0.308126	0.228893	-0.219047	0.398283	0.143194	0.583505	-0.162512	0.533165	0.00151732	0.995389	0.522108	0.0315661
ENSRNOG00000018593	Txndc9	280671	blue	0.55575	0.0205414	-0.769468	0.000304461	-0.446911	0.0720952	-0.164595	0.527859	-0.329	0.197248	-0.0197347	0.940074	0.481433	0.0503892	0.150285	0.564797	0.116449	0.656262	0.477303	0.052689	-0.276905	0.281945	0.289742	0.259297	-0.460778	0.062682	0.427032	0.0873425	0.334396	0.18956	-0.542156	0.0245595	0.157328	0.54648
ENSRNOG00000011156	Clstn3	171393	blue	-0.554617	0.0208552	0.805986	9.36e-05	0.572419	0.0163355	0.221288	0.393353	0.526617	0.0298709	0.0548957	0.834247	-0.536402	0.0264331	-0.121013	0.643614	0.0646605	0.805255	-0.233035	0.368054	0.3998	0.111834	-0.30494	0.23399	0.559129	0.0196272	-0.278671	0.27876	-0.305857	0.232516	0.0783156	0.765118	-0.208526	0.421874
ENSRNOG00000011624	Kcnq2	170848	blue	-0.554055	0.0210123	0.910964	3.74e-07	0.848173	1.7e-05	0.611724	0.00906597	0.582186	0.0142059	-0.630693	0.00663842	-0.46827	0.0579909	-0.635964	0.00606633	0.267462	0.299346	0.073833	0.778237	-0.0682357	0.794697	0.160422	0.538516	0.184226	0.479057	-0.471472	0.056068	-0.627269	0.00703275	0.378092	0.134556	0.189153	0.467166
ENSRNOG00000052506	Ak3	26956	blue	0.553772	0.0210919	-0.78718	0.000176745	-0.452618	0.0681036	-0.0318522	0.903409	-0.45452	0.06681	0.0408789	0.876211	0.733627	0.000802881	0.17594	0.499382	0.100964	0.699819	0.408304	0.10372	0.0173258	0.947379	0.488988	0.0463783	-0.789034	0.000166483	0.675854	0.00290038	0.545934	0.0233866	-0.422423	0.0911865	0.275363	0.284742
ENSRNOG00000017850	Dctpp1	192252	blue	0.552704	0.0213938	-0.76239	0.00037351	-0.442356	0.0754023	-0.337652	0.185018	-0.150707	0.563694	0.164449	0.528228	0.0905219	0.729709	-0.000820855	0.997505	0.16442	0.528302	0.198952	0.443962	-0.476276	0.053273	0.121745	0.641594	-0.157726	0.545452	-0.0599406	0.819241	-0.0720332	0.78352	-0.104935	0.688559	-0.243806	0.345677
ENSRNOG00000030404	Arrb1	25387	blue	-0.551581	0.0217148	0.901491	7.77e-07	0.729233	0.000894977	0.451744	0.0687042	0.522862	0.0312774	-0.512231	0.0355366	-0.504437	0.03893	-0.459568	0.063465	0.120034	0.646321	-0.0651602	0.803777	-0.12425	0.634698	-0.01572	0.95225	0.35105	0.16709	-0.550824	0.0219333	-0.651792	0.00458239	0.388527	0.123267	0.169819	0.514653
ENSRNOG00000020022	Psmc3ip	140938	blue	0.551035	0.0218723	-0.864805	7.47e-06	-0.822512	5.06e-05	-0.548233	0.0226942	-0.544453	0.0238411	0.491512	0.0450934	0.51605	0.0339585	0.659455	0.00397806	-0.264827	0.304312	-0.028484	0.913585	-0.0579598	0.825126	-0.0797425	0.760954	-0.213484	0.410668	0.499906	0.0410129	0.614492	0.0086733	-0.427585	0.0868898	-0.0362061	0.890276
ENSRNOG00000015442	Sfxn3	65042	blue	-0.550633	0.0219887	0.779181	0.000227312	0.643612	0.00530741	0.513266	0.0351034	0.413999	0.0985247	-0.481031	0.0506099	-0.348415	0.17052	-0.338918	0.183271	0.152783	0.558271	0.129978	0.61904	0.0398145	0.879412	0.0350441	0.893779	0.205388	0.429051	-0.244663	0.343931	-0.372881	0.140454	-0.0253848	0.922959	0.179612	0.490323
ENSRNOG00000001047	Map2k7	363855	blue	-0.549703	0.02226	0.734501	0.000785524	0.414294	0.0982613	0.370008	0.143781	0.0233503	0.929119	-0.287574	0.26304	0.0441724	0.866319	0.0362562	0.890125	-0.241486	0.35043	-0.103017	0.693991	0.356071	0.160684	-0.0697123	0.790347	0.0515403	0.844259	-0.0121545	0.963073	-0.0854945	0.744235	0.138664	0.595589	0.562983	0.0186237
ENSRNOG00000000609	Ipmk	171458	blue	-0.549244	0.0223951	0.912894	3.19e-07	0.778761	0.000230272	0.547313	0.0229694	0.476376	0.0532158	-0.528437	0.0292065	-0.404022	0.107751	-0.526777	0.0298118	0.16143	0.535931	0.00921386	0.972003	0.0899691	0.731302	0.0534897	0.83844	0.188532	0.468657	-0.321336	0.208512	-0.414774	0.0978326	0.270191	0.294252	0.185224	0.476636
ENSRNOG00000038047	Mt1	24567	blue	0.54915	0.0224227	-0.574188	0.0159322	-0.476376	0.0532158	-0.549786	0.0222359	-0.0576389	0.82608	0.472061	0.0557196	-0.032878	0.900312	0.30256	0.237846	-0.0185651	0.94362	-0.184732	0.47783	-0.380936	0.131411	-0.188229	0.469386	0.220748	0.394538	-0.111647	0.669665	-0.108569	0.678308	-0.0577052	0.825883	-0.420169	0.0931104
ENSRNOG00000021101	Sema6c	29744	blue	-0.548553	0.0225991	0.724746	0.000997852	0.684249	0.0024489	0.304511	0.234682	0.74847	0.00054767	-0.130942	0.616421	-0.699062	0.00179265	-0.401132	0.110533	0.34478	0.175329	-0.0202756	0.938434	0.122617	0.63919	-0.116183	0.657003	0.540273	0.0251611	-0.395246	0.116358	-0.410544	0.101653	0.0882407	0.736289	-0.330396	0.195239
ENSRNOG00000032226	Vom1r43	NA	blue	-0.54723	0.0229943	0.617051	0.00832237	0.22449	0.386366	0.0913385	0.727357	0.102585	0.695215	-0.115321	0.659403	-0.259339	0.314814	0.139691	0.592841	-0.308316	0.228591	-0.307534	0.229834	0.0969741	0.711193	-0.312477	0.222045	0.435513	0.0805774	-0.349032	0.169713	-0.279696	0.276921	0.283463	0.270228	0.140449	0.590814
ENSRNOG00000002433	G3bp2	305240	blue	-0.547184	0.0230082	0.710337	0.0013965	0.632648	0.0064214	0.468065	0.0581158	0.477635	0.0525013	-0.342522	0.17836	-0.247954	0.337272	-0.204399	0.431325	0.189257	0.466918	0.197948	0.446313	0.254202	0.324837	0.0486485	0.852905	0.212844	0.412104	-0.0563465	0.829926	-0.225968	0.383163	-0.145334	0.577832	0.224572	0.386187
ENSRNOG00000047014	Homer1	29546	blue	-0.54531	0.0235773	0.759607	0.000404015	0.782928	0.000202295	0.553533	0.0211593	0.595381	0.0116832	-0.587247	0.013192	-0.575426	0.0156548	-0.717479	0.00118512	0.359998	0.155792	0.189067	0.467372	-0.0854682	0.744311	0.121088	0.643408	0.216818	0.403221	-0.463134	0.0611774	-0.50927	0.0367983	0.237524	0.358631	0.00401374	0.987802
ENSRNOG00000043350	Cap2	116653	blue	-0.545058	0.0236547	0.756863	0.000436094	0.763624	0.000360614	0.615138	0.00858363	0.46879	0.0576758	-0.526642	0.0298617	-0.361577	0.153853	-0.580051	0.0146515	0.306839	0.230944	0.228607	0.377482	0.0958917	0.714289	0.167105	0.521495	0.0546812	0.834887	-0.254057	0.325122	-0.429689	0.0851806	0.092679	0.723503	0.166487	0.523057
ENSRNOG00000018824	Slc7a5	50719	blue	-0.544846	0.0237198	0.859864	9.63e-06	0.641432	0.00551542	0.281845	0.273091	0.526225	0.0300151	-0.149461	0.566958	-0.537664	0.0260131	-0.298569	0.244401	0.0630851	0.809917	-0.232968	0.368195	0.28794	0.262406	-0.230936	0.372507	0.504014	0.0391211	-0.321586	0.208138	-0.32046	0.209827	0.285118	0.267322	-0.181195	0.486443
ENSRNOG00000057094	Olr349	405393	blue	-0.544454	0.0238409	0.809516	8.25e-05	0.490571	0.0455695	0.363473	0.151547	0.213214	0.411274	-0.188098	0.469699	-0.197862	0.446514	-0.062383	0.811997	-0.13985	0.592415	-0.244906	0.343437	0.304397	0.234867	-0.125404	0.631531	0.221002	0.39398	-0.215882	0.405304	-0.306092	0.232139	0.275932	0.283708	0.291676	0.255987
ENSRNOG00000060486	Ptges3l1	367808	blue	0.544363	0.0238688	-0.735365	0.000768679	-0.7004	0.00174132	-0.489025	0.0463593	-0.550533	0.0220177	0.0857461	0.743506	0.34625	0.173373	0.363843	0.1511	-0.292568	0.254469	0.0350306	0.893819	-0.607856	0.00963839	-0.0888467	0.73454	-0.126221	0.629295	0.0243369	0.926131	0.0931091	0.722267	-0.119173	0.648702	0.133386	0.609796
ENSRNOG00000002721	Ndufb4	288088	blue	0.544135	0.0239395	-0.739677	0.000689035	-0.662186	0.00377902	-0.556065	0.0204548	-0.360056	0.155721	0.771263	0.000288754	0.308161	0.228837	0.540815	0.0249869	-0.151904	0.560563	-0.220104	0.395954	0.231065	0.372231	-0.164801	0.527333	-0.0836197	0.749673	0.32874	0.197623	0.417085	0.0957896	-0.199925	0.441691	-0.328896	0.197397
ENSRNOG00000004124	Grpr	24938	blue	-0.544078	0.0239573	0.816726	6.32e-05	0.805426	9.55e-05	0.570563	0.0167671	0.688362	0.00224964	-0.288437	0.261547	-0.469751	0.0570959	-0.460676	0.0627472	0.379328	0.133183	0.0346862	0.894857	0.204184	0.431818	0.166912	0.521982	0.203261	0.43395	-0.343696	0.17678	-0.568336	0.0172968	0.203079	0.434369	-0.0170847	0.94811
ENSRNOG00000056246	Gls	24398	blue	-0.543329	0.0241905	0.6476	0.00494318	0.381498	0.130796	0.0864159	0.741566	0.397995	0.113612	-0.316557	0.215744	-0.64403	0.00526821	-0.198105	0.445945	-0.0604427	0.817751	-0.127001	0.627159	-0.302415	0.238082	-0.352966	0.164626	0.676124	0.00288485	-0.622006	0.00767535	-0.496759	0.0425087	0.200359	0.440679	-0.0947752	0.717487
ENSRNOG00000000246	Amz2	360650	blue	-0.543228	0.0242222	0.804471	9.88e-05	0.546487	0.0232187	0.189296	0.466824	0.468111	0.0580881	-0.0556702	0.83194	-0.67967	0.00268742	-0.271464	0.291894	0.0514643	0.844486	-0.262833	0.308105	0.175242	0.501111	-0.347658	0.171515	0.592779	0.0121503	-0.466129	0.0593041	-0.304158	0.235254	0.156419	0.548828	-0.289003	0.260569
ENSRNOG00000017873	Sct	24769	blue	0.542438	0.0244706	-0.609612	0.0093751	-0.534713	0.0270037	-0.62114	0.00778545	-0.152033	0.560227	0.604021	0.010234	-0.134902	0.605702	0.235384	0.363107	-0.0510184	0.845818	-0.257206	0.318954	-0.235752	0.362335	-0.306376	0.231684	0.221889	0.392036	-0.158554	0.543317	0.0395447	0.880224	-0.0702442	0.788781	-0.572342	0.0163532
ENSRNOG00000003359	Ogt	26295	blue	-0.542426	0.0244743	0.782943	0.0002022	0.564855	0.018151	0.443103	0.0748525	0.251534	0.330114	-0.122488	0.639545	-0.127316	0.626298	-0.124844	0.633069	-0.0142522	0.956704	-0.113272	0.66512	0.608409	0.00955477	-0.0544941	0.835444	0.0950792	0.716616	0.0613115	0.815173	-0.0595631	0.820362	0.0695148	0.790928	0.184845	0.477554
ENSRNOG00000018901	Rab14	94197	blue	0.541113	0.0248915	-0.691088	0.00212508	-0.68529	0.00239716	-0.56093	0.0191532	-0.416751	0.096083	0.277289	0.28125	0.24761	0.337965	0.452782	0.067991	-0.287688	0.262843	-0.0764547	0.770557	-0.443225	0.0747634	-0.182308	0.483725	0.0240911	0.926875	-0.0445834	0.865086	0.0332845	0.899086	-0.101922	0.697098	0.0717102	0.784469
ENSRNOG00000048043	F2r	25439	blue	-0.540302	0.0251517	0.942081	1.63e-08	0.726132	0.000965074	0.417299	0.0956021	0.457901	0.0645555	-0.316481	0.215861	-0.474965	0.0540251	-0.382662	0.129528	0.0724258	0.782367	-0.1242	0.634837	0.205909	0.427854	-0.148553	0.569344	0.367872	0.146288	-0.369485	0.144392	-0.433601	0.0820681	0.22308	0.389435	0.0639132	0.807466
ENSRNOG00000003743	Dars	116483	blue	0.539915	0.0252766	-0.611101	0.00915628	-0.494347	0.0436828	-0.199272	0.443215	-0.562396	0.0187738	0.171015	0.511652	0.752089	0.000496958	0.439304	0.0776792	-0.193184	0.457548	0.225385	0.384425	0.152845	0.558109	0.145506	0.577379	-0.521915	0.0316399	0.652236	0.00454545	0.545938	0.0233854	-0.466533	0.0590546	0.458721	0.0640174
ENSRNOG00000013030	Pip4k2b	89812	blue	-0.536792	0.0263027	0.899514	8.96e-07	0.700567	0.00173498	0.324274	0.204145	0.518534	0.0329614	-0.18949	0.466358	-0.599122	0.011037	-0.4011	0.110565	0.111876	0.669025	-0.208582	0.421746	0.186539	0.473455	-0.196034	0.450809	0.457257	0.0649806	-0.485086	0.0484186	-0.445704	0.0729609	0.309878	0.22612	-0.0903358	0.730245
ENSRNOG00000018590	Drg1	305470	blue	-0.536411	0.0264303	0.890387	1.67e-06	0.674251	0.00299385	0.392107	0.119551	0.421277	0.0921609	-0.434088	0.0816863	-0.457911	0.0645492	-0.365532	0.149071	0.0369284	0.8881	-0.053858	0.837341	-0.00788474	0.97604	-0.142856	0.584403	0.384585	0.127451	-0.440088	0.0770895	-0.530487	0.0284725	0.217673	0.401324	0.168897	0.516973
ENSRNOG00000003247	Sde2	289315	blue	-0.536336	0.0264552	0.624489	0.00736659	0.540933	0.0249491	0.562412	0.0187697	0.131486	0.614942	-0.500933	0.0405337	0.0578227	0.825534	-0.241049	0.351329	0.0678854	0.79573	0.272597	0.289804	0.267521	0.299234	0.208327	0.422328	-0.19148	0.461602	0.133812	0.608643	0.014328	0.956474	-0.121076	0.64344	0.548512	0.0226114
ENSRNOG00000013484	LOC108348061	24421	blue	0.536212	0.0264969	-0.819435	5.7e-05	-0.66433	0.00362847	-0.473286	0.0550002	-0.556844	0.0202418	0.277147	0.281507	0.372653	0.140716	0.231771	0.370732	-0.175792	0.499748	0.0484995	0.853351	-0.176012	0.499204	-0.0351039	0.893598	-0.278521	0.279029	0.248065	0.337048	0.452399	0.0682536	-0.0991056	0.70511	-0.0928757	0.722937
ENSRNOG00000060749	Gpx6	259233	blue	-0.534179	0.0271859	0.607953	0.00962372	0.560576	0.0192456	0.595256	0.0117054	0.294068	0.251929	-0.670959	0.00319348	-0.168898	0.516969	-0.382905	0.129264	0.185528	0.475899	0.275445	0.284594	-0.186017	0.474717	0.282934	0.271164	-0.0640139	0.807167	-0.21752	0.401663	-0.356109	0.160637	0.0584847	0.823566	0.423996	0.0898616
ENSRNOG00000001441	Tmem120a	288591	blue	0.534058	0.0272273	-0.856026	1.17e-05	-0.600103	0.0108723	-0.237493	0.358696	-0.450977	0.0692344	0.256757	0.319828	0.614325	0.00869661	0.33335	0.191035	-0.00333893	0.989853	0.235369	0.363138	-0.0365685	0.889184	0.277515	0.280842	-0.567183	0.0175762	0.562129	0.0188425	0.480828	0.0507215	-0.362027	0.153304	0.146423	0.574956
ENSRNOG00000011696	Lifr	81680	blue	-0.533831	0.0273052	0.857284	1.1e-05	0.649082	0.0048131	0.335107	0.188562	0.422435	0.0911765	-0.447349	0.0717828	-0.47057	0.0566051	-0.380561	0.131823	-0.00141559	0.995698	-0.117719	0.652733	-0.0821214	0.754027	-0.137682	0.598223	0.424552	0.0893967	-0.573646	0.016055	-0.656277	0.00422028	0.463423	0.0609951	0.151189	0.562433
ENSRNOG00000016133	Sumo1	301442	blue	0.532994	0.027594	-0.733351	0.000808423	-0.461524	0.0622026	-0.370091	0.143683	-0.0731985	0.780098	0.266003	0.302089	0.0142505	0.95671	0.124703	0.633456	0.200194	0.441063	0.197482	0.447405	-0.420756	0.0926065	0.0527597	0.840618	-0.042297	0.87195	0.0362601	0.890113	0.101314	0.698826	-0.407651	0.104327	-0.38563	0.126332
ENSRNOG00000009550	Sqle	29230	blue	0.532909	0.0276234	-0.782173	0.000207141	-0.67468	0.00296861	-0.477711	0.0524583	-0.388027	0.123792	0.193028	0.45792	0.351274	0.166801	0.457644	0.0647249	-0.166268	0.523614	0.15727	0.546627	-0.426882	0.0874656	-0.0664332	0.800016	-0.0686463	0.793487	0.226071	0.38294	0.221665	0.392527	-0.38815	0.123662	0.03073	0.906798
ENSRNOG00000019349	Sf3a2	299620	blue	-0.531594	0.0280818	0.890649	1.65e-06	0.697168	0.00186745	0.34456	0.175623	0.428853	0.0858565	-0.305624	0.232891	-0.516008	0.0339754	-0.454752	0.0666533	0.0570164	0.827932	-0.181025	0.48686	0.162506	0.533181	-0.154439	0.553962	0.3768	0.136002	-0.475443	0.0537499	-0.413586	0.0988955	0.427094	0.087292	0.013358	0.959419
ENSRNOG00000004346	Notch3	56761	blue	-0.531497	0.0281157	0.694339	0.00198393	0.680254	0.00265597	0.502974	0.0395938	0.512975	0.0352247	-0.36664	0.147748	-0.254009	0.325216	-0.316944	0.215153	0.274139	0.286976	0.219262	0.397809	0.286493	0.264919	0.13648	0.60145	0.135244	0.604779	-0.00653663	0.980136	-0.145545	0.577275	-0.105857	0.685953	0.101424	0.698511
ENSRNOG00000012514	Abhd17b	309399	blue	-0.530931	0.0283152	0.513393	0.0350506	0.490315	0.0456995	0.614191	0.00871533	0.305299	0.233413	-0.695242	0.0019461	-0.0687664	0.793133	-0.279382	0.277484	0.190376	0.464238	0.323107	0.205874	-0.260901	0.311805	0.389971	0.121758	-0.133545	0.609366	-0.188035	0.469853	-0.455142	0.066391	0.0524747	0.841468	0.516544	0.0337583
ENSRNOG00000061102	Taf9b	171152	blue	-0.530704	0.0283955	0.845651	1.9e-05	0.602341	0.0105039	0.184451	0.47851	0.498943	0.0414666	-0.182657	0.482873	-0.662324	0.00376918	-0.339509	0.18246	0.0187385	0.943094	-0.228356	0.37802	0.0783558	0.765	-0.357536	0.158848	0.624124	0.00741134	-0.520647	0.0321307	-0.450415	0.0696249	0.283173	0.27074	-0.150119	0.565233
ENSRNOG00000000473	Pfdn6	309629	blue	0.530514	0.0284629	-0.650105	0.00472495	-0.55616	0.0204287	-0.523318	0.031104	-0.204452	0.431201	0.738418	0.000711549	0.17747	0.495599	0.426486	0.0877921	-0.053675	0.837887	-0.251011	0.331153	0.18474	0.47781	-0.156223	0.549336	-0.0032808	0.990029	0.312336	0.222264	0.407912	0.104083	-0.180083	0.489167	-0.494749	0.043485
ENSRNOG00000014241	Ece1	94204	blue	-0.530308	0.0285358	0.721917	0.00106762	0.467	0.0587672	0.19446	0.454524	0.350512	0.167787	-0.201688	0.437591	-0.421911	0.0916214	-0.181626	0.485389	-0.0752501	0.774083	-0.175472	0.500542	0.259265	0.314959	-0.287133	0.263806	0.48931	0.0462128	-0.214944	0.407397	-0.11855	0.650428	0.207061	0.425217	-0.104971	0.688457
ENSRNOG00000043388	Irf3	292892	blue	0.529678	0.0287603	-0.773404	0.000270915	-0.738955	0.000701872	-0.360624	0.155022	-0.685728	0.00237566	0.186907	0.47257	0.714061	0.00128272	0.525736	0.0301965	-0.353881	0.163459	0.0433838	0.868686	-0.0746265	0.77591	0.0707139	0.787399	-0.44569	0.0729715	0.517801	0.0332531	0.525179	0.0304035	-0.199277	0.443202	0.316444	0.215917
ENSRNOG00000060010	Ss18l1	192352	blue	-0.529622	0.0287804	0.901161	7.96e-07	0.578928	0.0148904	0.157463	0.54613	0.449067	0.0705679	-0.125307	0.631799	-0.669014	0.00331644	-0.269788	0.295	-0.0679669	0.79549	-0.361806	0.153573	0.093659	0.720688	-0.41719	0.0956978	0.673665	0.0030286	-0.603191	0.0103667	-0.512798	0.0352989	0.390846	0.120851	-0.154413	0.554028
ENSRNOG00000016298	Lysmd3	315923	blue	0.528499	0.0291843	-0.867712	6.4e-06	-0.577708	0.0151534	-0.234489	0.364986	-0.387848	0.123981	0.362148	0.153156	0.56207	0.0188578	0.322761	0.206387	0.0904693	0.72986	0.223302	0.388951	0.0792627	0.762354	0.314227	0.219328	-0.575782	0.0155758	0.60737	0.00971237	0.61163	0.00907953	-0.437963	0.078696	-0.0343122	0.895985
ENSRNOG00000014964	Hp	24464	blue	0.527986	0.02937	-0.732715	0.00082131	-0.401052	0.110612	-0.0728662	0.781074	-0.312577	0.221889	0.0024729	0.992485	0.518513	0.0329695	0.0539799	0.836978	0.137546	0.598587	0.331607	0.193508	-0.213009	0.411733	0.403028	0.108703	-0.600362	0.0108292	0.442573	0.0752423	0.254494	0.324262	-0.243033	0.347257	0.127254	0.626467
ENSRNOG00000026646	Ndufs5	362588	blue	0.527393	0.0295861	-0.786278	0.000181931	-0.635863	0.00607692	-0.583666	0.0139033	-0.258973	0.315522	0.558175	0.0198821	0.136114	0.602437	0.376788	0.136016	-0.0626238	0.811283	-0.0609804	0.816155	-0.133775	0.608745	-0.154783	0.553068	0.0293812	0.910873	0.0994545	0.704115	0.220963	0.394065	-0.20029	0.44084	-0.382454	0.129754
ENSRNOG00000018659	Csf1	78965	blue	-0.5265	0.0299138	0.883528	2.58e-06	0.709739	0.0014155	0.470759	0.0564923	0.363033	0.152081	-0.358292	0.157905	-0.263266	0.307279	-0.367003	0.147317	0.0512201	0.845215	-0.0898672	0.731596	0.308011	0.229075	0.0132154	0.959852	0.14446	0.580146	-0.230566	0.373295	-0.306996	0.230693	0.325187	0.202801	0.254399	0.324449
ENSRNOG00000002292	Hnrnpd	79256	blue	0.526331	0.0299762	-0.739507	0.000692034	-0.624916	0.00731445	-0.438191	0.0785222	-0.579593	0.0147486	0.161995	0.534486	0.4235	0.090278	0.257177	0.31901	-0.230389	0.373672	0.136073	0.602547	-0.146956	0.573547	-0.0772261	0.768301	-0.256796	0.319753	0.333067	0.191434	0.528239	0.0292782	-0.252302	0.32859	0.060976	0.816168
ENSRNOG00000036689	P4hb	25506	blue	0.526253	0.0300048	-0.768252	0.0003155	-0.805031	9.69e-05	-0.514138	0.0347418	-0.797568	0.000125448	0.366395	0.14804	0.645462	0.00513581	0.603438	0.010327	-0.448471	0.0709875	-0.0231399	0.929756	0.0531433	0.839473	-0.152861	0.558067	-0.327549	0.199349	0.5278	0.0294379	0.722525	0.00105228	-0.357816	0.158497	0.207923	0.423247
ENSRNOG00000019439	Polr2g	117017	blue	0.525748	0.0301919	-0.87256	4.91e-06	-0.685351	0.00239413	-0.471194	0.0562334	-0.25254	0.328118	0.449628	0.0701739	0.216158	0.404691	0.402911	0.108814	0.0215878	0.934458	0.0292446	0.911286	-0.328963	0.197301	0.042265	0.872046	-0.129328	0.620811	0.171575	0.51025	0.214244	0.408964	-0.301448	0.239661	-0.299063	0.243584
ENSRNOG00000008980	Rbm48	296840	blue	0.525385	0.0303268	-0.752766	0.000487919	-0.676477	0.00286471	-0.511543	0.0358266	-0.378839	0.133725	0.478908	0.0517859	0.357133	0.159352	0.577479	0.015203	-0.18126	0.486284	0.0179612	0.945451	-0.150491	0.564259	-0.138516	0.595985	-0.0573881	0.826826	0.252502	0.328194	0.196135	0.450571	-0.390569	0.121138	-0.00999944	0.969617
ENSRNOG00000007972	Rbbp9	29459	blue	0.525254	0.0303756	-0.643381	0.00532909	-0.441417	0.0760978	-0.258811	0.315837	-0.307931	0.229202	0.563295	0.0185442	0.505678	0.038374	0.422005	0.0915413	0.0426213	0.870976	0.115694	0.658362	0.381357	0.13095	0.101996	0.696888	-0.391008	0.120683	0.644028	0.00526837	0.562305	0.0187973	-0.569991	0.016902	-0.0392288	0.881174
ENSRNOG00000022323	Tcea1	362479	blue	0.524661	0.0305974	-0.869842	5.71e-06	-0.678704	0.00274005	-0.273404	0.288323	-0.633099	0.00637213	0.0831704	0.750978	0.688191	0.00225768	0.366836	0.147516	-0.157484	0.546076	0.277399	0.281051	-0.20834	0.422298	0.233682	0.366687	-0.568735	0.017201	0.486289	0.0477826	0.480738	0.0507708	-0.317724	0.213964	0.311233	0.223989
ENSRNOG00000016847	Bace1	29392	blue	-0.524457	0.0306737	0.8497	1.58e-05	0.603531	0.0103122	0.435679	0.0804489	0.340244	0.181454	-0.20663	0.426203	-0.177167	0.496345	-0.100201	0.701989	-0.0112105	0.965939	-0.123544	0.636641	0.400174	0.111467	-0.0534833	0.838459	0.194365	0.454749	-0.0580447	0.824874	-0.22815	0.378463	0.0855131	0.744181	0.269545	0.295452
ENSRNOG00000025689	Abhd1	313917	blue	0.524378	0.0307035	-0.674702	0.00296731	-0.587206	0.0132001	-0.231307	0.371717	-0.529067	0.0289795	0.271434	0.291949	0.71057	0.00138912	0.487009	0.0474049	-0.186837	0.472737	0.0178972	0.945645	-0.0062	0.981159	0.204023	0.432189	-0.528155	0.0293088	0.587917	0.0130623	0.439959	0.0771866	-0.234521	0.364919	0.285626	0.266433
ENSRNOG00000017418	Rps3	140654	blue	0.523669	0.0309709	-0.723946	0.0010172	-0.839518	2.5e-05	-0.726177	0.000964044	-0.572379	0.0163446	0.429847	0.085053	0.250848	0.331478	0.571557	0.0165348	-0.499508	0.0411997	-0.357816	0.158497	-0.433966	0.0817819	-0.341011	0.180408	0.116099	0.657237	-0.139346	0.593765	0.0118077	0.964125	0.218752	0.398935	-0.0498184	0.849405
ENSRNOG00000031778	Mef2d	81518	blue	-0.523381	0.03108	0.806662	9.14e-05	0.699231	0.00178611	0.388789	0.122992	0.456339	0.0655898	-0.430927	0.0841867	-0.502404	0.0398544	-0.560979	0.0191403	0.141082	0.589127	-0.0675749	0.796646	0.0407544	0.876586	-0.0313603	0.904894	0.290789	0.257501	-0.46439	0.0603866	-0.398744	0.112871	0.45441	0.0668845	0.0248592	0.92455
ENSRNOG00000014819	Hap1	29430	blue	-0.52325	0.0311298	0.808226	8.64e-05	0.471413	0.0561033	0.0736813	0.778682	0.396429	0.115171	-0.0323073	0.902035	-0.539493	0.0254134	-0.0881453	0.736565	-0.149428	0.567046	-0.36814	0.145973	0.184111	0.479336	-0.447769	0.0714846	0.678463	0.00275332	-0.459458	0.0635366	-0.411602	0.100688	0.347351	0.171918	-0.0926863	0.723482
ENSRNOG00000008761	Ncs1	65153	blue	-0.522798	0.0313019	0.910182	3.99e-07	0.731537	0.000845647	0.323027	0.205992	0.532449	0.027783	-0.142615	0.585045	-0.583767	0.0138827	-0.419673	0.0935374	0.123438	0.636932	-0.223854	0.387747	0.296139	0.248447	-0.207675	0.423813	0.456911	0.0652098	-0.431894	0.0834157	-0.421287	0.092153	0.342671	0.178159	-0.146913	0.573661
ENSRNOG00000001416	Vgf	29461	blue	-0.52006	0.03236	0.875285	4.21e-06	0.562861	0.0186547	0.233015	0.368096	0.369232	0.144689	-0.2587	0.316051	-0.496316	0.0427226	-0.204634	0.430782	-0.101256	0.69899	-0.237603	0.358467	0.0209979	0.936245	-0.311346	0.223812	0.539854	0.0252965	-0.533046	0.0275757	-0.570763	0.0167203	0.313278	0.220799	0.0977434	0.708996
ENSRNOG00000007326	Prepl	298771	blue	-0.520047	0.0323648	0.828246	4.02e-05	0.609333	0.00941651	0.443269	0.0747313	0.270917	0.292905	-0.495116	0.0433055	-0.264938	0.304102	-0.324977	0.20311	-0.035439	0.892588	-0.0312757	0.905149	0.0355184	0.892349	-0.0556201	0.832089	0.206365	0.42681	-0.298095	0.245187	-0.434223	0.0815806	0.265025	0.303938	0.317884	0.21372
ENSRNOG00000018273	Ncl	25135	blue	0.519294	0.0326609	-0.562825	0.0186639	-0.61098	0.00917392	-0.495906	0.042921	-0.532596	0.0277319	0.274655	0.286033	0.299067	0.243577	0.377572	0.135138	-0.319362	0.21148	-0.101569	0.6981	-0.190983	0.462787	-0.241399	0.350609	-0.0595359	0.820443	0.244364	0.344539	0.44645	0.0724252	-0.268937	0.296585	-0.0584117	0.823783
ENSRNOG00000019811	Timm23	54312	blue	0.519181	0.0327054	-0.846065	1.87e-05	-0.763738	0.000359434	-0.497612	0.042099	-0.512648	0.0353614	0.336521	0.186587	0.465598	0.0596333	0.53343	0.0274432	-0.219285	0.397758	0.0739859	0.777788	-0.222833	0.389974	-0.0351238	0.893538	-0.228436	0.377849	0.384109	0.127963	0.484804	0.0485687	-0.394721	0.116888	0.0692891	0.791593
ENSRNOG00000020699	Cd37	29185	blue	0.518537	0.0329602	-0.693833	0.00200538	-0.611028	0.00916689	-0.269401	0.295721	-0.618208	0.00816755	-0.0584923	0.823543	0.698491	0.00181494	0.393587	0.118038	-0.283789	0.269656	0.22228	0.39118	-0.254711	0.323836	0.160583	0.538101	-0.474435	0.0543313	0.433925	0.0818139	0.408215	0.103802	-0.265037	0.303916	0.502613	0.0397589
ENSRNOG00000003195	Caskin1	140722	blue	-0.518177	0.0331031	0.893877	1.33e-06	0.730516	0.000867219	0.295964	0.248739	0.615967	0.00846956	-0.260874	0.311857	-0.659447	0.00397865	-0.439923	0.0772136	0.14444	0.580198	-0.159699	0.540371	0.0736032	0.778911	-0.210752	0.416822	0.564271	0.0182974	-0.558568	0.0197769	-0.569923	0.016918	0.351707	0.166243	-0.125758	0.630563
ENSRNOG00000001347	Adam1a	56777	blue	0.517629	0.0333219	-0.561655	0.0189647	-0.173259	0.506044	-0.0842208	0.747928	0.0932636	0.721823	0.18553	0.475895	0.131713	0.614328	-0.0701768	0.788979	0.395451	0.116152	0.335146	0.188507	-0.0259995	0.921099	0.2606	0.312384	-0.259172	0.315138	0.355881	0.160925	0.225499	0.384178	-0.484113	0.048938	-0.323769	0.204892
ENSRNOG00000015430	Nlgn2	117096	blue	-0.516935	0.0336004	0.95445	2.79e-09	0.728919	0.000901865	0.356274	0.16043	0.471132	0.0562702	-0.31228	0.222353	-0.521481	0.0318074	-0.426568	0.0877242	0.0419608	0.87296	-0.218714	0.399019	0.143443	0.582843	-0.174184	0.503739	0.41923	0.0939208	-0.484518	0.0487211	-0.493063	0.0443175	0.424697	0.0892755	0.0472644	0.857049
ENSRNOG00000029028	Mknk2	299618	blue	-0.516788	0.03366	0.845053	1.96e-05	0.805672	9.47e-05	0.461499	0.0622184	0.593267	0.0120616	-0.486162	0.0478496	-0.590561	0.0125598	-0.654463	0.00436389	0.282283	0.272314	0.0496185	0.850003	-0.00558579	0.983025	0.0152993	0.953527	0.322721	0.206447	-0.49623	0.0427638	-0.493375	0.0441623	0.323407	0.205428	-0.0356663	0.891903
ENSRNOG00000001762	Pcyt1a	140544	blue	-0.515378	0.0342322	0.70909	0.00143639	0.57768	0.0151594	0.34118	0.180179	0.509918	0.0365193	-0.278825	0.278482	-0.418263	0.0947601	-0.209636	0.419352	0.161089	0.536805	0.106217	0.684935	0.182896	0.482291	-0.0965358	0.712446	0.377695	0.134999	-0.163949	0.529501	-0.178922	0.492019	-0.191789	0.460867	0.0364877	0.889427
ENSRNOG00000002186	Nudt9	305149	blue	0.51439	0.0346379	-0.770643	0.000294104	-0.702548	0.00166142	-0.643037	0.00536168	-0.28006	0.276271	0.438148	0.078555	-0.0188054	0.942891	0.318069	0.213438	-0.134241	0.607486	-0.171799	0.509689	-0.493694	0.0440045	-0.237084	0.35955	0.160596	0.538068	-0.127301	0.62634	0.0858279	0.743269	-0.0418378	0.873329	-0.442736	0.0751227
ENSRNOG00000017408	Fam160a2	293343	blue	-0.512973	0.0352258	0.652198	0.00454862	0.746945	0.000570295	0.394158	0.117458	0.73368	0.000801805	-0.290414	0.258145	-0.730577	0.000865909	-0.674841	0.00295916	0.482272	0.0499313	0.131904	0.61381	0.017716	0.946195	0.0249159	0.924379	0.381803	0.130462	-0.453258	0.067666	-0.412298	0.100057	0.156016	0.549872	-0.356946	0.159586
ENSRNOG00000008996	Dpysl5	65208	blue	-0.512591	0.0353854	0.885061	2.35e-06	0.569834	0.0169392	0.188566	0.468574	0.360569	0.155089	-0.258306	0.316816	-0.489945	0.0458882	-0.22135	0.393218	-0.137516	0.598669	-0.243369	0.346571	0.0790812	0.762883	-0.365398	0.14923	0.572921	0.0162204	-0.497175	0.0423086	-0.498226	0.0418062	0.34101	0.18041	0.110217	0.673675
ENSRNOG00000039848	Ak6	102238592	blue	0.512367	0.0354796	-0.868043	6.29e-06	-0.71652	0.00121185	-0.590501	0.0125711	-0.341451	0.179811	0.39463	0.11698	0.141973	0.586753	0.359463	0.156452	-0.0868716	0.740247	0.0535916	0.838136	-0.38219	0.130041	-0.1511	0.562665	0.0241192	0.92679	0.0956239	0.715056	0.264744	0.304471	-0.289637	0.259478	-0.331785	0.193255
ENSRNOG00000000923	Cct6a	288620	blue	-0.511787	0.0357237	0.63661	0.00599903	0.362065	0.153257	0.169296	0.515969	0.303441	0.236414	-0.0796789	0.76114	-0.335905	0.187445	-0.0410401	0.875727	-0.0985279	0.706757	-0.313536	0.220399	0.0688662	0.792839	-0.172648	0.507569	0.359612	0.156269	-0.339645	0.182274	-0.36569	0.148881	0.365658	0.148919	0.0691984	0.79186
ENSRNOG00000030170	Krt10	450225	blue	-0.510856	0.0361182	0.502578	0.0397746	0.2554	0.322482	0.250997	0.331182	0.0278199	0.915593	-0.000465083	0.998587	0.00675529	0.979472	0.143114	0.583718	-0.157155	0.546925	-0.0601597	0.818591	0.510765	0.0361569	-0.144656	0.579627	0.0739117	0.778006	0.160772	0.537618	0.123196	0.637598	-0.139949	0.592151	0.298421	0.244646
ENSRNOG00000008049	Max	60661	blue	0.510407	0.0363096	-0.780549	0.000217898	-0.646341	0.00505594	-0.378241	0.13439	-0.499377	0.0412615	0.318311	0.213071	0.419435	0.0937433	0.293962	0.252108	-0.137878	0.597696	-0.0447997	0.864437	-0.146936	0.573602	0.114814	0.660815	-0.384047	0.128029	0.230806	0.372784	0.382832	0.129343	-0.00599908	0.981769	-0.0152099	0.953798
ENSRNOG00000021725	Unc119b	288702	blue	-0.510202	0.0363976	0.774093	0.000265374	0.713938	0.00128635	0.523875	0.0308931	0.467767	0.0582977	-0.226337	0.382366	-0.248807	0.335559	-0.302474	0.237986	0.25841	0.316614	0.144526	0.579972	0.508648	0.0370672	0.0674706	0.796954	0.0930907	0.72232	0.0889388	0.734274	-0.013807	0.958056	-0.225552	0.384062	0.106744	0.683447
ENSRNOG00000033261	Fam107a	361018	blue	-0.510148	0.0364206	0.865012	7.39e-06	0.50945	0.0367205	0.0963457	0.71299	0.359107	0.156894	-0.0543315	0.835929	-0.590278	0.0126129	-0.214732	0.407871	-0.156209	0.549372	-0.46574	0.0595448	0.165026	0.526762	-0.43404	0.0817242	0.623198	0.00752578	-0.552978	0.0213159	-0.422308	0.0912845	0.508266	0.0372333	-0.127968	0.624517
ENSRNOG00000029592	Srsf11	502603	blue	0.509547	0.0366788	-0.856691	1.13e-05	-0.645159	0.00516361	-0.352194	0.165617	-0.336892	0.186071	0.163592	0.530411	0.354644	0.162488	0.309056	0.227417	0.000879704	0.997326	0.199283	0.44319	-0.471569	0.0560107	0.161095	0.53679	-0.290339	0.258273	0.253702	0.325822	0.229766	0.375002	-0.327368	0.199611	-0.0299758	0.909076
ENSRNOG00000017447	Eif2s2	296302	blue	0.509411	0.0367371	-0.756777	0.00043713	-0.57767	0.0151614	-0.447457	0.0717066	-0.292889	0.253923	0.218271	0.4	0.186895	0.472597	0.276795	0.282143	-0.0370312	0.88779	0.172885	0.506977	-0.435208	0.0808132	-0.0344844	0.895466	-0.0662752	0.800482	0.0264248	0.919812	0.0675513	0.796716	-0.310057	0.225836	-0.0995677	0.703793
ENSRNOG00000007528	Kcnh7	170739	blue	-0.509169	0.0368416	0.480813	0.0507299	0.457905	0.0645529	0.523919	0.0308765	0.176188	0.498767	-0.404239	0.107544	-0.0245248	0.925562	-0.261043	0.311532	0.127901	0.624701	0.273716	0.28775	0.312126	0.222592	0.202584	0.435515	-0.14985	0.565939	0.0754259	0.773568	-0.00796022	0.975811	-0.0670502	0.798194	0.375099	0.137922
ENSRNOG00000049931	LOC288913	288913	blue	0.508071	0.0373185	-0.848034	1.71e-05	-0.730488	0.00086781	-0.499602	0.0411556	-0.436303	0.0799671	0.399363	0.112262	0.447525	0.0716583	0.518941	0.0328001	-0.180676	0.487714	0.0109063	0.966862	-0.228591	0.377516	0.00168468	0.99488	-0.216343	0.404278	0.307263	0.230267	0.283142	0.270796	-0.216267	0.404447	0.00205249	0.993762
ENSRNOG00000001113	Mmd2	304301	blue	0.508031	0.0373362	-0.748298	0.000550185	-0.528028	0.029355	-0.503634	0.0392934	-0.13993	0.592202	0.302578	0.237818	-0.075979	0.771949	0.0667928	0.798954	0.0870949	0.739602	0.0377212	0.885712	-0.439081	0.0778481	-0.0771353	0.768566	0.0564774	0.829536	-0.0828322	0.751961	0.156889	0.547612	-0.134388	0.60709	-0.503325	0.0394338
ENSRNOG00000003967	Vmp1	192129	blue	-0.508008	0.0373462	0.457666	0.0647105	0.457223	0.0650032	0.68737	0.00229643	0.0176758	0.946317	-0.500553	0.0407105	0.268439	0.297515	-0.204143	0.431913	0.124754	0.633314	0.392301	0.119352	0.426244	0.0879911	0.418691	0.0943876	-0.476865	0.0529373	0.349556	0.16903	0.18144	0.485845	-0.201892	0.437116	0.600659	0.0107799
ENSRNOG00000053659	RGD1311703	293160	blue	0.50782	0.0374284	-0.814482	6.87e-05	-0.764889	0.000347774	-0.438915	0.0779731	-0.634378	0.00623417	0.379509	0.132983	0.613823	0.00876694	0.545409	0.023547	-0.292885	0.25393	-0.0514897	0.84441	-0.0752511	0.77408	0.026199	0.920495	-0.387314	0.124544	0.488689	0.0465326	0.547265	0.0229838	-0.191123	0.462453	0.130653	0.617206
ENSRNOG00000002488	Galnt10	170501	blue	-0.507459	0.0375864	0.865762	7.11e-06	0.766238	0.000334515	0.549342	0.0223662	0.38425	0.127811	-0.484854	0.0485422	-0.267538	0.299203	-0.528843	0.02906	0.139259	0.593995	-0.00838726	0.974514	0.201025	0.43913	0.117743	0.652666	0.0456346	0.861933	-0.232082	0.370073	-0.343535	0.176996	0.37152	0.142023	0.256851	0.319646
ENSRNOG00000051483	LOC103689961	25545	blue	0.506749	0.0378986	-0.656497	0.00420317	-0.19736	0.447691	0.0989851	0.705453	-0.0833135	0.750562	0.0371414	0.887458	0.520027	0.032373	-0.00183248	0.994431	0.386952	0.124927	0.502176	0.039959	0.0159899	0.951431	0.584569	0.0137211	-0.682594	0.00253302	0.566547	0.0177317	0.276856	0.282033	-0.464459	0.0603435	0.121143	0.643255
ENSRNOG00000013089	Kif13b	305967	blue	-0.505711	0.0383591	0.877856	3.63e-06	0.646387	0.00505176	0.431866	0.0834381	0.270342	0.293971	-0.34924	0.169441	-0.214758	0.407814	-0.286011	0.26576	-0.0481169	0.854496	-0.120671	0.64456	0.30813	0.228887	-0.0524432	0.841563	0.157211	0.54678	-0.226083	0.382914	-0.285683	0.266332	0.304002	0.235506	0.349733	0.168799
ENSRNOG00000003846	Pitpna	29525	blue	0.505378	0.0385079	-0.334003	0.190113	-0.491149	0.0452766	-0.496407	0.0426784	-0.520892	0.0320355	0.0581292	0.824623	0.179976	0.489431	0.268283	0.297807	-0.471958	0.0557807	-0.199131	0.443544	-0.45695	0.0651838	-0.374855	0.138199	0.12036	0.645418	-0.175221	0.501163	-0.0413862	0.874686	0.0752114	0.774197	0.236866	0.360005
ENSRNOG00000003837	Mif4gd	360659	blue	0.504813	0.0387609	-0.7781	0.000234991	-0.603415	0.0103307	-0.204526	0.431032	-0.668768	0.00333228	0.15529	0.551751	0.823811	4.8e-05	0.39326	0.118371	-0.183692	0.480354	0.248934	0.335305	0.113967	0.663178	0.25418	0.32488	-0.687289	0.00230031	0.711087	0.00137291	0.655916	0.0042486	-0.359001	0.157024	0.383971	0.128112
ENSRNOG00000014602	Mtfmt	315763	blue	0.504724	0.0388008	-0.799042	0.000119307	-0.484757	0.0485939	-0.231299	0.371734	-0.265683	0.302694	0.427896	0.0866356	0.385024	0.12698	0.241742	0.349905	0.186052	0.474633	0.257366	0.318642	0.133326	0.609959	0.215269	0.406671	-0.435885	0.0802892	0.537006	0.0262315	0.550143	0.0221315	-0.560771	0.0191947	-0.192917	0.458182
ENSRNOG00000060665	Afap1	140935	blue	-0.504673	0.0388239	0.86859	6.11e-06	0.704402	0.00159487	0.522996	0.0312264	0.33891	0.183282	-0.339031	0.183117	-0.15865	0.54307	-0.309172	0.227234	0.0630706	0.80996	-0.0422479	0.872097	0.409028	0.103048	0.0665794	0.799584	0.048733	0.852652	-0.0805579	0.758578	-0.215932	0.405192	0.196396	0.449957	0.342037	0.179016
ENSRNOG00000011927	Sdc3	116673	blue	-0.504246	0.0390163	0.893738	1.34e-06	0.61979	0.00795947	0.17398	0.504249	0.472703	0.0553417	-0.22083	0.394359	-0.658528	0.00404754	-0.355425	0.1615	-0.0318075	0.903544	-0.305814	0.232584	0.0153889	0.953255	-0.354716	0.162396	0.636988	0.00595997	-0.63399	0.00627576	-0.545465	0.0235298	0.455643	0.066055	-0.100282	0.701758
ENSRNOG00000019964	Taok2	64666	blue	-0.503273	0.0394574	0.76867	0.000311666	0.813811	7.05e-05	0.455135	0.066396	0.715736	0.00123409	-0.440399	0.0768572	-0.601386	0.0106599	-0.617453	0.00826834	0.403799	0.107964	0.194829	0.453654	-0.0119919	0.963566	0.0294637	0.910624	0.360024	0.155759	-0.363882	0.151054	-0.490903	0.0454011	0.0680682	0.795191	-0.111767	0.669329
ENSRNOG00000008843	Eci1	29740	blue	0.5018	0.0401324	-0.723276	0.00103361	-0.620567	0.00785894	-0.336656	0.186399	-0.581873	0.0142705	0.358995	0.157031	0.655623	0.0042716	0.471221	0.0562169	-0.215891	0.405283	0.0561107	0.830628	0.0950748	0.716628	0.0757202	0.772707	-0.463313	0.061064	0.567282	0.017552	0.554568	0.0208689	-0.29445	0.251285	0.255118	0.323037
ENSRNOG00000020078	Vstm4	361112	blue	0.500888	0.0405544	-0.665887	0.00352223	-0.399928	0.111708	-0.113599	0.664205	-0.39627	0.11533	0.229482	0.375609	0.668852	0.00332691	0.257924	0.317558	0.0502972	0.847973	0.281084	0.274443	0.24841	0.336355	0.31608	0.216476	-0.626695	0.00710072	0.732476	0.000826211	0.648065	0.00490204	-0.449231	0.0704529	0.189528	0.466268
ENSRNOG00000012721	Ednra	24326	blue	-0.499925	0.041004	0.647024	0.00499448	0.746844	0.000571819	0.493235	0.0442319	0.751515	0.000504727	-0.416333	0.0964507	-0.506055	0.0382061	-0.50602	0.0382217	0.486379	0.0477354	0.31876	0.212391	0.0948214	0.717355	0.153153	0.557307	0.277634	0.280627	-0.140917	0.589568	-0.244397	0.344472	-0.170319	0.513399	-0.159951	0.539725
ENSRNOG00000016411	Rps12	65139	blue	0.499852	0.0410383	-0.761226	0.000386029	-0.522345	0.0314749	-0.17318	0.506241	-0.512651	0.0353605	-0.0708498	0.786999	0.650701	0.00467416	0.19707	0.448372	-0.0803238	0.75926	0.302161	0.238497	-0.281251	0.274146	0.338666	0.183618	-0.596275	0.0115263	0.39373	0.117893	0.289567	0.259598	-0.139083	0.594467	0.335073	0.188609
ENSRNOG00000009370	Tbkbp1	266764	blue	-0.499707	0.0411066	0.830866	3.61e-05	0.795405	0.000134942	0.513652	0.0349431	0.588566	0.0129374	-0.562059	0.0188606	-0.526407	0.0299483	-0.632183	0.00647254	0.281698	0.273353	0.0526889	0.840829	-0.172402	0.508181	0.114861	0.660685	0.248479	0.336217	-0.562061	0.01886	-0.686252	0.00235012	0.408339	0.103687	0.11681	0.655257
ENSRNOG00000001789	Zfp148	58820	blue	0.497861	0.0419804	-0.701958	0.00168306	-0.516023	0.0339695	-0.144443	0.580192	-0.457402	0.0648847	0.248882	0.335408	0.660556	0.0038968	0.356362	0.160318	-0.0630606	0.80999	0.106561	0.683966	0.0636249	0.808319	0.314858	0.218353	-0.598829	0.0110867	0.489642	0.0460429	0.297152	0.246755	-0.169399	0.51571	0.185073	0.477003
ENSRNOG00000015573	Ctbs	81652	blue	0.497583	0.0421131	-0.752975	0.000485159	-0.48941	0.0461615	-0.172527	0.507872	-0.36474	0.15002	0.346659	0.172832	0.628568	0.00688104	0.391905	0.119758	0.0807325	0.758069	0.32895	0.19732	0.273572	0.288014	0.255402	0.322478	-0.54482	0.0237278	0.80847	8.57e-05	0.73425	0.000790478	-0.715156	0.00125074	0.0573875	0.826828
ENSRNOG00000019932	Ip6k1	50560	blue	-0.497397	0.0422023	0.908309	4.63e-07	0.646075	0.00508001	0.257244	0.31888	0.454845	0.0665911	-0.0987969	0.70599	-0.521559	0.0317773	-0.289316	0.260031	-0.00069823	0.997878	-0.314829	0.218398	0.333122	0.191356	-0.27593	0.283712	0.48484	0.0485496	-0.389305	0.122452	-0.335521	0.187982	0.345978	0.173735	-0.0723621	0.782554
ENSRNOG00000010365	Syn1	24949	blue	-0.49712	0.0423352	0.802124	0.000107274	0.64635	0.0050551	0.1618	0.534984	0.619196	0.00803712	-0.107837	0.680368	-0.830805	3.62e-05	-0.468024	0.0581411	0.164045	0.529258	-0.215725	0.405654	0.0621338	0.812735	-0.365589	0.149002	0.706536	0.00152103	-0.624547	0.00735943	-0.503476	0.0393651	0.30571	0.232752	-0.41335	0.0991074
ENSRNOG00000015983	Maip1	301418	blue	0.496275	0.0427423	-0.79675	0.000128973	-0.69885	0.0018009	-0.436215	0.0800345	-0.561743	0.018942	0.28267	0.27163	0.451173	0.0690986	0.439648	0.0774205	-0.208013	0.423043	0.149194	0.56766	-0.109714	0.675088	-0.0707569	0.787272	-0.232402	0.369394	0.414809	0.0978016	0.544719	0.0237589	-0.443663	0.0744423	-0.00264452	0.991963
ENSRNOG00000053889	Celsr3	83466	blue	-0.496247	0.0427558	0.914385	2.82e-07	0.674068	0.00300468	0.257962	0.317482	0.493305	0.0441972	-0.288408	0.261597	-0.618809	0.00808798	-0.427336	0.0870936	0.00308874	0.990613	-0.269325	0.295862	0.0581253	0.824634	-0.274307	0.286669	0.55332	0.0212191	-0.611536	0.00909313	-0.596002	0.0115739	0.50888	0.0369668	-0.0518816	0.843239
ENSRNOG00000005067	Zfp36l2	298765	blue	-0.49612	0.0428171	0.843777	2.07e-05	0.569118	0.0171094	0.399573	0.112056	0.232718	0.368724	-0.198454	0.445127	-0.112583	0.667047	-0.087153	0.739433	-0.0903996	0.730061	-0.170399	0.513198	0.433526	0.0821271	-0.0787495	0.763851	0.148941	0.568324	-0.0412633	0.875056	-0.153329	0.556848	0.151484	0.561661	0.333608	0.19067
ENSRNOG00000017849	Apbb3	117026	blue	0.495489	0.0431238	-0.572003	0.0164314	-0.509766	0.0365846	-0.273557	0.288041	-0.403912	0.107856	0.263162	0.307476	0.555438	0.0206276	0.48385	0.0490786	-0.194915	0.45345	0.0192424	0.941566	-0.120476	0.645097	0.0931225	0.722229	-0.331253	0.194013	0.293787	0.252403	0.0727265	0.781484	-0.19205	0.460246	0.395129	0.116476
ENSRNOG00000049181	Sh2b1	89817	blue	-0.495328	0.0432023	0.720001	0.0011171	0.710563	0.00138935	0.488162	0.0468045	0.357236	0.159223	-0.449712	0.0701154	-0.302091	0.23861	-0.583473	0.0139423	0.198192	0.445739	0.107026	0.682652	0.214904	0.407487	0.0982818	0.707459	0.0513376	0.844864	-0.219427	0.397445	-0.246712	0.339776	0.304596	0.234545	0.133409	0.609733
ENSRNOG00000010390	Hmbs	25709	blue	0.49474	0.0434894	-0.826873	4.25e-05	-0.570375	0.0168114	-0.264023	0.305838	-0.427521	0.0869417	0.450644	0.0694655	0.530055	0.0286259	0.350145	0.168263	0.0524303	0.841601	0.211636	0.414825	0.231301	0.371729	0.189693	0.465872	-0.507638	0.0375078	0.652065	0.00455967	0.688579	0.0022395	-0.536868	0.0262774	-0.117268	0.653985
ENSRNOG00000000264	Def8	307973	blue	-0.492993	0.0443522	0.651259	0.00462704	0.349232	0.169452	0.0205895	0.937483	0.325228	0.202741	0.316537	0.215775	-0.481288	0.0504689	0.0771405	0.768551	-0.0816031	0.755535	-0.376196	0.136682	0.536889	0.0262705	-0.459651	0.0634108	0.586244	0.0133882	-0.202058	0.436732	-0.0408098	0.876419	0.0326518	0.900995	-0.32099	0.20903
ENSRNOG00000000613	Tfam	83474	blue	0.492918	0.0443896	-0.816423	6.39e-05	-0.66938	0.00329304	-0.304544	0.234629	-0.450468	0.0695876	0.187956	0.470042	0.50507	0.0386459	0.436951	0.0794688	-0.0804468	0.758902	0.185711	0.475458	-0.272853	0.289335	0.186317	0.473993	-0.388135	0.123678	0.418163	0.094847	0.453828	0.0672783	-0.428141	0.0864354	0.0976899	0.709149
ENSRNOG00000018840	Rnf40	266712	blue	-0.491965	0.0448659	0.552273	0.0215164	0.469312	0.0573601	0.493295	0.044202	0.190577	0.463758	-0.0664496	0.799967	-0.0508901	0.846201	-0.153524	0.556341	0.134239	0.60749	0.0433864	0.868678	0.629553	0.00676773	0.136077	0.602535	-0.148226	0.570204	0.154046	0.554981	0.093471	0.721228	-0.0955513	0.715264	0.168011	0.519205
ENSRNOG00000009675	Cdc42bpb	113960	blue	-0.491163	0.0452693	0.830274	3.7e-05	0.736385	0.000749183	0.29979	0.242385	0.699678	0.00176886	-0.170263	0.513538	-0.71259	0.00132669	-0.467581	0.0584115	0.26246	0.308818	-0.125081	0.632418	0.162494	0.533212	-0.176125	0.498922	0.567786	0.0174295	-0.494135	0.0437867	-0.492147	0.0447744	0.256095	0.321121	-0.336215	0.187014
ENSRNOG00000001156	Msi1	259272	blue	-0.490339	0.0456874	0.892701	1.44e-06	0.587427	0.0131571	0.180807	0.487393	0.335327	0.188254	-0.226124	0.382827	-0.550522	0.0220209	-0.343034	0.17767	-0.119012	0.649148	-0.347393	0.171863	0.101722	0.697666	-0.34675	0.172712	0.531802	0.028009	-0.5781	0.0150684	-0.458345	0.0642637	0.527876	0.0294103	-0.01866	0.943332
ENSRNOG00000004172	Pdk2	81530	blue	-0.48941	0.0461616	0.786732	0.000179302	0.602682	0.0104487	0.222003	0.391788	0.524729	0.0305719	0.115398	0.659188	-0.570585	0.016762	-0.261938	0.309815	0.128147	0.624029	-0.318155	0.213308	0.492239	0.0447285	-0.252642	0.327915	0.481078	0.0505839	-0.276835	0.28207	-0.194856	0.453589	0.234293	0.3654	-0.383204	0.128939
ENSRNOG00000010104	Pofut1	311551	blue	-0.487818	0.0469834	0.741425	0.00065876	0.830817	3.62e-05	0.531308	0.0281821	0.64423	0.00524956	-0.471795	0.0558766	-0.603544	0.01031	-0.762209	0.000375438	0.453414	0.06756	0.21074	0.416851	0.0398078	0.879432	0.121524	0.642203	0.203954	0.43235	-0.409215	0.102876	-0.447375	0.0717649	0.145982	0.576118	-0.139181	0.594205
ENSRNOG00000050860	Abcb11	83569	blue	-0.487149	0.0473319	0.789488	0.000164049	0.677221	0.00282254	0.427265	0.0871515	0.493802	0.043951	-0.306046	0.232212	-0.390033	0.121694	-0.370661	0.14302	0.160015	0.53956	-0.102858	0.694442	0.0251604	0.923638	0.0493772	0.850725	0.228296	0.378148	-0.447747	0.0715	-0.656175	0.00422831	0.392574	0.119072	0.143728	0.582087
ENSRNOG00000025745	Gpr17	767613	blue	-0.486772	0.0475289	0.910605	3.85e-07	0.663191	0.00370781	0.374843	0.138213	0.325547	0.202273	-0.393232	0.118399	-0.358387	0.157787	-0.367597	0.146613	-0.048631	0.852957	-0.183505	0.480808	0.123044	0.638016	-0.1201	0.646139	0.288109	0.262114	-0.413531	0.0989443	-0.432671	0.0828006	0.426889	0.0874604	0.252544	0.32811
ENSRNOG00000011470	Tsc1	60445	blue	-0.486692	0.0475709	0.833676	3.21e-05	0.635236	0.00614284	0.217607	0.40147	0.555914	0.0204963	-0.312151	0.222553	-0.69872	0.00180597	-0.441403	0.0761085	0.0733981	0.779513	-0.196642	0.449379	-0.12771	0.625222	-0.269154	0.296181	0.607715	0.00965973	-0.658062	0.0040828	-0.629787	0.00674096	0.406871	0.105056	-0.112755	0.666564
ENSRNOG00000020202	Asrgl1	246307	blue	-0.486237	0.04781	0.865922	7.04e-06	0.67732	0.00281699	0.418402	0.0946387	0.419197	0.0939491	-0.475552	0.0536874	-0.444354	0.0739387	-0.418126	0.0948794	0.0725892	0.781887	-0.0386128	0.883028	-0.0455504	0.862186	-0.0805152	0.758702	0.322215	0.2072	-0.429856	0.0850461	-0.51325	0.0351102	0.225866	0.383383	0.151117	0.562621
ENSRNOG00000055226	Dab2ip	192126	blue	-0.485811	0.0480346	0.887752	1.98e-06	0.660948	0.00386819	0.228302	0.378136	0.491411	0.0451444	-0.159362	0.541238	-0.600069	0.0108781	-0.382728	0.129456	0.0294322	0.910719	-0.297114	0.246819	0.208648	0.421596	-0.2837	0.269812	0.541592	0.0247384	-0.500235	0.0408591	-0.419135	0.0940026	0.443742	0.0743846	-0.142511	0.58532
ENSRNOG00000012386	Zbtb38	315936	blue	-0.485714	0.0480858	0.79284	0.00014698	0.699583	0.0017725	0.559282	0.0195866	0.317155	0.214831	-0.571276	0.0166002	-0.222239	0.391271	-0.500497	0.0407368	0.103158	0.693589	0.0997673	0.703225	0.140889	0.589643	0.120312	0.645552	0.0214602	0.934844	-0.249334	0.334501	-0.378353	0.134266	0.287078	0.263901	0.375184	0.137826
ENSRNOG00000010512	Yipf1	298312	blue	-0.485673	0.0481078	0.550303	0.0220848	0.71705	0.00119701	0.79182	0.000152005	0.431737	0.0835409	-0.386684	0.125211	0.0150709	0.95422	-0.450648	0.0694624	0.492803	0.0444467	0.434832	0.0811057	0.553765	0.0210938	0.508678	0.0370544	-0.394178	0.117438	0.395086	0.116519	0.131635	0.614539	-0.305998	0.23229	0.206022	0.427596
ENSRNOG00000030109	Kpna5	294392	blue	-0.484582	0.0486869	0.76277	0.000369501	0.600774	0.0107609	0.268274	0.297825	0.52134	0.0318618	-0.0385182	0.883313	-0.521146	0.0319371	-0.222709	0.390244	0.135925	0.602945	-0.0929847	0.722624	0.41085	0.101374	-0.253188	0.326836	0.499108	0.0413883	-0.218739	0.398965	-0.198593	0.444803	-0.032418	0.901701	-0.193052	0.457862
ENSRNOG00000007351	Ggh	25455	blue	0.483318	0.0493652	-0.832047	3.44e-05	-0.402711	0.109007	-0.0891849	0.733564	-0.159467	0.540968	0.062819	0.810705	0.402177	0.109522	0.0838019	0.749144	0.318857	0.212244	0.511834	0.0357038	-0.275408	0.284661	0.444452	0.073867	-0.526213	0.0300198	0.426537	0.0877499	0.282733	0.271518	-0.534884	0.0269454	0.00859858	0.973872
ENSRNOG00000013076	Csnk1e	58822	blue	-0.483116	0.0494738	0.7749	0.000259003	0.336017	0.18729	-0.0323018	0.902051	0.235879	0.36207	0.167609	0.520222	-0.499107	0.041389	0.048539	0.853233	-0.288159	0.262027	-0.556099	0.0204454	0.343934	0.17646	-0.567052	0.017608	0.670511	0.00322148	-0.397727	0.113877	-0.224786	0.385723	0.346998	0.172384	-0.174164	0.503791
ENSRNOG00000000852	Prrc2a	294250	blue	-0.480575	0.0508608	0.698999	0.00179511	0.513324	0.0350794	0.149819	0.566019	0.434795	0.0811344	0.0118129	0.96411	-0.510883	0.0361066	-0.264748	0.304461	0.0305635	0.9073	-0.298636	0.24429	0.294296	0.251543	-0.262722	0.308316	0.453931	0.0672089	-0.350523	0.167773	-0.298568	0.244403	0.373229	0.140055	-0.205524	0.428738
ENSRNOG00000014370	Krt9	266717	blue	-0.480417	0.0509477	0.72652	0.000956069	0.488258	0.046755	0.307257	0.230275	0.268733	0.296967	-0.16313	0.531589	-0.207231	0.424828	-0.151243	0.562292	-0.0531513	0.839449	-0.215352	0.406486	0.379515	0.132976	-0.0870829	0.739636	0.189485	0.466371	-0.0444795	0.865397	-0.0390136	0.881822	0.221313	0.393297	0.062415	0.811902
ENSRNOG00000023931	Ggn	292765	blue	-0.480345	0.0509878	0.584024	0.0138308	0.474329	0.054393	0.201039	0.439097	0.589824	0.0126984	0.0197131	0.940139	-0.557023	0.0201932	-0.11324	0.665208	0.240847	0.351745	0.000686874	0.997912	0.215333	0.406529	-0.190106	0.464884	0.505569	0.0384227	-0.16453	0.528023	-0.142247	0.586022	-0.299709	0.242517	-0.325566	0.202244
ENSRNOG00000021184	Mark2	60328	blue	-0.480221	0.0510562	0.829236	3.86e-05	0.744563	0.000607169	0.413754	0.0987444	0.555333	0.0206567	-0.126097	0.629633	-0.53194	0.0279606	-0.509957	0.0365025	0.258573	0.316297	-0.16846	0.518073	0.407308	0.104647	-0.0501142	0.84852	0.281002	0.274591	-0.253707	0.325812	-0.236075	0.361658	0.283127	0.270822	-0.280729	0.275077
ENSRNOG00000004477	Ublcp1	360514	blue	0.47955	0.0514285	-0.735594	0.000764278	-0.593783	0.0119684	-0.512511	0.0354191	-0.200581	0.440164	0.52177	0.0316959	0.0911769	0.727823	0.397944	0.113662	-0.00621664	0.981108	0.0495257	0.85028	-0.132445	0.612344	-0.171894	0.509453	0.068888	0.792775	0.156851	0.547712	0.25983	0.313868	-0.462619	0.0615038	-0.340179	0.181543
ENSRNOG00000001657	Cldnd1	288182	blue	-0.479075	0.051693	0.867765	6.39e-06	0.538609	0.0257019	0.34804	0.171012	0.138355	0.596417	-0.230018	0.374464	-0.157064	0.54716	-0.169575	0.515268	-0.202235	0.436322	-0.2925	0.254584	0.425176	0.0888764	-0.164833	0.527253	0.178782	0.492365	-0.166809	0.522243	-0.182872	0.482349	0.388814	0.122966	0.297455	0.246251
ENSRNOG00000004518	Cacnb1	50688	blue	-0.477408	0.0526293	0.825759	4.45e-05	0.874359	4.44e-06	0.607876	0.00963533	0.670416	0.00322748	-0.626496	0.00712436	-0.527402	0.0295829	-0.76212	0.000376381	0.399708	0.111924	0.129791	0.619549	-0.151931	0.560494	0.221095	0.393775	0.167333	0.520917	-0.497195	0.0422989	-0.69844	0.00181695	0.408548	0.103493	0.0656083	0.802453
ENSRNOG00000016875	Cbx7	362962	blue	-0.477195	0.0527502	0.851796	1.43e-05	0.4327	0.0827771	0.049483	0.850408	0.220618	0.394823	-0.0270462	0.917932	-0.467032	0.0587475	-0.088743	0.734839	-0.296369	0.248063	-0.506338	0.0380806	0.226266	0.382519	-0.496748	0.0425137	0.605727	0.00996554	-0.504505	0.0388996	-0.383633	0.128476	0.517191	0.0334975	0.0195278	0.940701
ENSRNOG00000019674	Mfsd13a	309454	blue	-0.476515	0.0531367	0.852104	1.41e-05	0.729581	0.00088738	0.336988	0.185938	0.559073	0.0196422	-0.30212	0.238563	-0.58463	0.0137088	-0.499801	0.0410623	0.184169	0.479195	-0.0865934	0.741052	0.129229	0.62108	-0.13465	0.606382	0.418593	0.0944731	-0.404323	0.107464	-0.375553	0.137408	0.232248	0.36972	-0.136255	0.602057
ENSRNOG00000000907	Alox5ap	29624	blue	0.475708	0.0535978	-0.500916	0.0405418	-0.463833	0.0607366	-0.462559	0.0615419	-0.131756	0.61421	0.301204	0.24006	0.103136	0.693653	0.346904	0.172507	-0.1033	0.693186	-0.142315	0.585843	-0.384705	0.127323	-0.117068	0.654542	0.123798	0.63594	0.00292278	0.991117	-0.00188569	0.994269	-0.0795934	0.761389	-0.216944	0.402942
ENSRNOG00000024603	Rps15	29285	blue	0.475012	0.0539982	-0.807742	8.8e-05	-0.593251	0.0120644	-0.351453	0.16657	-0.320533	0.209716	0.241504	0.350394	0.434703	0.0812065	0.362295	0.152977	-0.0447046	0.864722	0.165053	0.526694	-0.228442	0.377835	0.13705	0.599918	-0.273023	0.289022	0.309443	0.226805	0.202176	0.43646	-0.198885	0.444119	0.0248993	0.924429
ENSRNOG00000016066	Bambi	83837	blue	0.474601	0.0542354	-0.732468	0.000826362	-0.82545	4.5e-05	-0.48042	0.0509464	-0.76469	0.000349766	0.477009	0.0528557	0.75215	0.000496137	0.770115	0.000298721	-0.492586	0.0445548	-0.168284	0.518519	0.167167	0.521338	-0.0884285	0.735747	-0.367185	0.147102	0.620852	0.00782232	0.698211	0.00182597	-0.239496	0.354536	0.266666	0.30084
ENSRNOG00000036745	Gna13	303634	blue	-0.472344	0.0555528	0.863504	8e-06	0.693134	0.00203534	0.539239	0.025496	0.295028	0.250311	-0.552894	0.0213397	-0.177975	0.494351	-0.412716	0.099679	0.0232922	0.929295	-0.0429827	0.86989	0.0754293	0.773558	0.119041	0.649067	0.0341364	0.896516	-0.28993	0.258975	-0.465649	0.0596015	0.409194	0.102895	0.4239	0.0899418
ENSRNOG00000014647	Cbfb	361391	blue	0.471734	0.0559131	-0.620301	0.00789327	-0.456671	0.0653691	-0.0690967	0.79216	-0.511735	0.0357457	-0.196367	0.450026	0.614814	0.00862852	0.187733	0.470578	-0.11096	0.67159	0.304376	0.234901	-0.422147	0.091421	0.338541	0.18379	-0.586857	0.013268	0.249545	0.33408	0.0739246	0.777968	-0.174239	0.503603	0.534349	0.0271279
ENSRNOG00000019207	Shank1	78957	blue	-0.470522	0.0566339	0.85589	1.17e-05	0.833142	3.29e-05	0.51376	0.0348982	0.631386	0.00656089	-0.61992	0.00794268	-0.570597	0.016759	-0.715404	0.00124359	0.289227	0.260183	0.0642001	0.806617	-0.161657	0.535351	0.0796127	0.761333	0.298482	0.244546	-0.556176	0.0204244	-0.699708	0.00176769	0.436122	0.0801065	0.0365077	0.889367
ENSRNOG00000002262	Enoph1	305177	blue	-0.469316	0.0573575	0.595307	0.0116963	0.525021	0.0304626	0.609311	0.00941972	0.230257	0.373953	-0.428204	0.0863841	0.109836	0.674746	-0.110237	0.67362	0.123385	0.637076	0.209363	0.419972	0.197823	0.446604	0.337574	0.185125	-0.217166	0.402448	0.062141	0.812714	-0.249104	0.334962	-0.0502312	0.848171	0.598654	0.0111163
ENSRNOG00000007040	Timm17a	54311	blue	0.469189	0.0574344	-0.78806	0.000171814	-0.637079	0.00595049	-0.45993	0.0632295	-0.222887	0.389855	0.434402	0.0814411	0.247104	0.338984	0.476702	0.0530301	-0.0103638	0.96851	0.0742821	0.77692	-0.218846	0.398728	0.00609261	0.981485	-0.0820907	0.754116	0.245703	0.341818	0.290651	0.257737	-0.426202	0.0880263	-0.202252	0.436283
ENSRNOG00000017206	Igfbp5	25285	blue	-0.467842	0.0582518	0.726226	0.000962889	0.433936	0.0818056	0.151769	0.560916	0.232105	0.370024	-0.16551	0.525535	-0.29227	0.254976	-0.0558911	0.831282	-0.176005	0.49922	-0.166129	0.523964	0.264146	0.305604	-0.307909	0.229238	0.424807	0.0891837	-0.261737	0.3102	-0.21208	0.413824	0.151244	0.562287	0.194719	0.453912
ENSRNOG00000012820	Add3	25230	blue	0.467829	0.05826	-0.584104	0.0138148	-0.492849	0.0444241	-0.123804	0.635925	-0.619351	0.00801676	-0.123842	0.635819	0.676002	0.00289186	0.240855	0.351729	-0.254491	0.324268	0.138957	0.594806	-0.315715	0.217036	0.270945	0.292854	-0.587081	0.0132244	0.20696	0.425447	0.0446894	0.864768	0.0665394	0.799702	0.573399	0.0161111
ENSRNOG00000015732	Bcl2l2	60434	blue	-0.467181	0.0586565	0.786662	0.000179709	0.574708	0.0158154	0.0801762	0.75969	0.539746	0.0253315	-0.168319	0.518429	-0.826847	4.26e-05	-0.438445	0.0783293	0.0568275	0.828495	-0.285044	0.26745	-0.0938836	0.720044	-0.408877	0.103188	0.748655	0.000544983	-0.734832	0.000779039	-0.540039	0.0252365	0.429375	0.085434	-0.364712	0.150053
ENSRNOG00000011276	Tmem254	290529	blue	0.46717	0.058663	-0.675716	0.00290831	-0.456314	0.0656068	-0.334538	0.18936	-0.202132	0.43656	0.333064	0.191438	0.132679	0.611709	0.0870814	0.73964	0.0953429	0.715861	0.000382123	0.998839	-0.170512	0.512914	0.0853371	0.744691	-0.202244	0.436301	0.159291	0.54142	0.25522	0.322836	-0.101375	0.698652	-0.42372	0.090093
ENSRNOG00000003150	Mpc2	100359982	blue	0.466174	0.0592761	-0.788999	0.000166675	-0.777459	0.000239644	-0.702122	0.001677	-0.42083	0.0925438	0.500023	0.040958	0.142463	0.585447	0.521167	0.031929	-0.268361	0.297661	-0.0701445	0.789074	-0.237359	0.358975	-0.360318	0.155397	0.165137	0.526482	0.138008	0.597349	0.386544	0.125359	-0.346816	0.172624	-0.30557	0.232977
ENSRNOG00000004814	Elob	81807	blue	0.465974	0.0593996	-0.672741	0.00308415	-0.71604	0.00122544	-0.667887	0.00338944	-0.426483	0.0877946	0.63095	0.00660958	0.195622	0.451781	0.515913	0.0340142	-0.330013	0.195789	-0.380313	0.132096	-0.0721516	0.783172	-0.289575	0.259584	0.0879903	0.737013	0.0420812	0.872598	0.240664	0.352123	0.136115	0.602433	-0.338255	0.184185
ENSRNOG00000012830	Paqr8	316275	blue	-0.464554	0.0602838	0.859181	9.97e-06	0.628161	0.00692828	0.370933	0.142704	0.408946	0.103124	-0.217295	0.402163	-0.346477	0.173072	-0.244989	0.343269	0.0151409	0.954007	-0.24622	0.340772	0.236907	0.35992	-0.0855928	0.74395	0.304337	0.234964	-0.320993	0.209027	-0.442174	0.0755369	0.366319	0.14813	0.0639079	0.807481
ENSRNOG00000003398	Tomm40l	304971	blue	-0.464189	0.0605128	0.842253	2.22e-05	0.531366	0.0281617	0.179442	0.490742	0.362804	0.152358	-0.229201	0.376209	-0.565904	0.0178901	-0.248813	0.335546	-0.088623	0.735185	-0.265501	0.303038	-0.00350499	0.989348	-0.357685	0.158662	0.57363	0.0160586	-0.548687	0.0225596	-0.488334	0.0467156	0.277862	0.280216	-0.0272956	0.917178
ENSRNOG00000034040	Rnf113a1	313450	blue	0.464088	0.0605761	-0.862676	8.35e-06	-0.61123	0.00913754	-0.365705	0.148863	-0.259421	0.314657	0.541342	0.0248183	0.336673	0.186375	0.417998	0.0949903	0.107115	0.682403	0.157641	0.54567	0.0451083	0.863511	0.107156	0.682286	-0.271205	0.292372	0.478246	0.0521573	0.497192	0.0423003	-0.5369	0.0262666	-0.313181	0.220949
ENSRNOG00000010815	Elf2	361944	blue	0.464004	0.060629	-0.727842	0.000925879	-0.699047	0.00179324	-0.338787	0.183451	-0.682859	0.00251936	0.0940482	0.719572	0.708132	0.00146768	0.528762	0.0290893	-0.369374	0.144522	0.10301	0.69401	-0.247086	0.339021	0.0912541	0.7276	-0.435361	0.0806952	0.347586	0.171609	0.290326	0.258295	-0.15323	0.557106	0.530264	0.0285514
ENSRNOG00000000924	Slc7a1	25648	blue	-0.462953	0.0612922	0.894784	1.25e-06	0.846357	1.84e-05	0.579517	0.0147648	0.574313	0.0159042	-0.527645	0.0294944	-0.393151	0.118483	-0.564661	0.0181994	0.271013	0.292727	0.0630975	0.80988	0.0436909	0.867764	0.145012	0.578684	0.168692	0.517489	-0.356865	0.159687	-0.568029	0.0173709	0.288134	0.262071	0.186589	0.473335
ENSRNOG00000029651	Rdh16	299511	blue	-0.461635	0.0621314	0.682036	0.0025619	0.321785	0.207842	-0.00552238	0.983218	0.172524	0.507877	-0.27292	0.289211	-0.540177	0.025192	-0.19362	0.456515	-0.297553	0.246088	-0.333802	0.190396	-0.162593	0.53296	-0.500293	0.0408316	0.672574	0.00309425	-0.656692	0.004188	-0.489693	0.0460168	0.540955	0.024942	-0.0310575	0.905808
ENSRNOG00000047506	LOC100362980	361888	blue	0.461526	0.0622012	-0.843856	2.07e-05	-0.796944	0.000128128	-0.470009	0.0569405	-0.538708	0.0256695	0.530888	0.0283306	0.564987	0.0181179	0.701245	0.00170951	-0.242528	0.348291	-0.0412376	0.875133	0.0152238	0.953756	0.000809292	0.99754	-0.284979	0.267564	0.504782	0.0387749	0.537028	0.026224	-0.364257	0.150601	-0.00801851	0.975634
ENSRNOG00000015417	Kansl3	316328	blue	-0.46102	0.062526	0.654573	0.00435508	0.508387	0.037181	0.271992	0.29092	0.413762	0.0987374	-0.116272	0.656756	-0.324407	0.20395	-0.158843	0.542572	0.085548	0.74408	-0.0415325	0.874247	0.424321	0.089589	-0.150079	0.565338	0.348495	0.170416	0.0142405	0.95674	0.0275513	0.916405	-0.0541754	0.836395	-0.142906	0.584272
ENSRNOG00000043381	Cyth1	116691	blue	-0.460342	0.062963	0.819179	5.75e-05	0.750542	0.000518141	0.518907	0.0328133	0.464352	0.0604105	-0.395201	0.116404	-0.329703	0.196234	-0.466965	0.0587891	0.211792	0.414474	0.0310884	0.905715	0.193507	0.456784	0.11361	0.664174	0.111539	0.669969	-0.298281	0.244879	-0.411288	0.100974	0.235312	0.363257	0.206837	0.425728
ENSRNOG00000019529	Btbd1	293060	blue	-0.459538	0.0634846	0.806197	9.3e-05	0.715276	0.00124728	0.601359	0.0106644	0.429461	0.0853646	-0.365069	0.149624	-0.199006	0.443836	-0.360793	0.154814	0.207578	0.424035	0.0517286	0.843696	0.366018	0.148489	0.161008	0.537014	0.01683	0.948882	-0.0154496	0.953071	-0.21077	0.416782	0.045715	0.861692	0.175395	0.500732
ENSRNOG00000009348	Nos3	24600	blue	-0.458775	0.0639821	0.782921	0.000202342	0.794803	0.000137691	0.448329	0.0710881	0.710327	0.00139681	-0.413468	0.0990014	-0.643385	0.00532879	-0.644604	0.00521486	0.383482	0.128639	0.0895945	0.732382	0.0610668	0.815899	0.0162398	0.950673	0.374174	0.138975	-0.381714	0.13056	-0.42655	0.0877393	0.150393	0.564516	-0.264783	0.304397
ENSRNOG00000009033	Cntn2	25356	blue	-0.458232	0.0643381	0.869855	5.7e-06	0.602918	0.0104106	0.356818	0.159746	0.263974	0.305932	-0.445502	0.0731071	-0.254777	0.323705	-0.266701	0.300775	-0.120679	0.644537	-0.143734	0.582072	0.0297222	0.909842	-0.116672	0.655641	0.270615	0.293465	-0.39685	0.11475	-0.515192	0.0343081	0.396747	0.114853	0.416417	0.0963774
ENSRNOG00000008941	Ets1	24356	blue	-0.458006	0.0644864	0.76977	0.000301769	0.783541	0.000198436	0.560852	0.0191734	0.561792	0.0189295	-0.40367	0.108087	-0.283329	0.270466	-0.450902	0.0692863	0.338311	0.184107	0.220196	0.395751	0.305013	0.233873	0.162401	0.533448	0.0876792	0.737912	0.0029142	0.991143	-0.169009	0.51669	-0.115853	0.657919	0.105849	0.685976
ENSRNOG00000007532	RGD1305178	311855	blue	-0.455982	0.0658283	0.537943	0.0259211	0.521611	0.0317572	0.697036	0.00187276	0.183157	0.481656	-0.405331	0.106506	0.207403	0.424434	-0.152744	0.558372	0.192017	0.460323	0.283067	0.270929	0.399766	0.111867	0.447735	0.0715089	-0.414083	0.0984502	0.287566	0.263055	0.0154024	0.953214	-0.191444	0.461687	0.578213	0.0150439
ENSRNOG00000004373	Ddx39a	89827	blue	0.455328	0.0662663	-0.787312	0.000175998	-0.543976	0.0239888	-0.143934	0.581541	-0.441556	0.075995	0.0815132	0.755796	0.583102	0.014018	0.301432	0.239687	0.00846319	0.974283	0.358839	0.157225	-0.185337	0.476362	0.311622	0.22338	-0.55505	0.0207351	0.443628	0.0744678	0.332344	0.192459	-0.432388	0.0830242	0.291506	0.256276
ENSRNOG00000012209	Cdadc1	361052	blue	0.453319	0.0676245	-0.618932	0.00807186	-0.485306	0.0483018	-0.344157	0.176161	-0.268764	0.296909	0.349255	0.169421	0.270282	0.294083	0.350287	0.168079	-0.0189874	0.942339	0.159652	0.540493	-0.0360358	0.890789	-0.0466602	0.858859	-0.145847	0.576475	0.342258	0.178717	0.385318	0.126666	-0.567568	0.0174824	-0.0284095	0.91381
ENSRNOG00000031993	Prim1	246327	blue	-0.452597	0.0681183	0.837477	2.73e-05	0.49908	0.0414015	0.135954	0.602867	0.306706	0.231156	-0.147117	0.573124	-0.467051	0.0587361	-0.125754	0.630574	-0.159075	0.541975	-0.264378	0.305164	0.135506	0.604074	-0.417365	0.0955438	0.574041	0.0159654	-0.427772	0.0867365	-0.395786	0.115815	0.183663	0.480424	0.0730016	0.780676
ENSRNOG00000013961	Ghitm	290596	blue	-0.452206	0.0683863	0.723392	0.00103076	0.486215	0.0478216	0.250359	0.332453	0.26132	0.311001	-0.2956	0.249351	-0.386921	0.12496	-0.221115	0.393732	-0.0457678	0.861534	-0.046111	0.860505	0.0638801	0.807564	-0.248464	0.336247	0.376463	0.136382	-0.287579	0.263032	-0.262386	0.308958	-0.00143456	0.99564	0.0967806	0.711746
ENSRNOG00000015090	Nubp2	287125	blue	0.45203	0.0685069	-0.642713	0.00539244	-0.35762	0.158743	-0.118915	0.649416	-0.220633	0.394791	0.436368	0.0799165	0.517509	0.0333699	0.264114	0.305666	0.166394	0.523294	0.16366	0.530238	0.323815	0.204824	0.299077	0.243561	-0.531131	0.0282446	0.679546	0.00269414	0.523556	0.0310136	-0.414067	0.0984646	-0.0752226	0.774164
ENSRNOG00000005578	Zbtb44	363035	blue	-0.451257	0.0690403	0.520058	0.0323608	0.674909	0.00295521	0.805293	9.6e-05	0.353145	0.164397	-0.594946	0.0117604	0.0803409	0.75921	-0.421119	0.0922965	0.439154	0.0777931	0.579361	0.0147979	0.294497	0.251205	0.536152	0.0265171	-0.414457	0.098116	0.32496	0.203134	0.0241308	0.926755	-0.413585	0.0988963	0.440869	0.076506
ENSRNOG00000011258	Masp2	64459	blue	-0.450363	0.0696608	0.849693	1.58e-05	0.524599	0.0306206	0.156839	0.547741	0.297322	0.246472	-0.223204	0.389164	-0.491359	0.0451705	-0.265727	0.30261	-0.164814	0.527301	-0.316283	0.216164	0.10807	0.679711	-0.387472	0.124377	0.532053	0.027921	-0.472921	0.0552139	-0.406435	0.105465	0.396603	0.114997	0.0367044	0.888774
ENSRNOG00000010868	Rims4	266976	blue	-0.449171	0.0704948	0.772833	0.000275583	0.536976	0.0262416	0.0425713	0.871126	0.538222	0.0258291	-0.0281308	0.914652	-0.8329	3.32e-05	-0.371528	0.142014	0.0340953	0.89664	-0.387278	0.124582	0.0164778	0.949951	-0.448855	0.0707171	0.773757	0.000268064	-0.732764	0.000820305	-0.531453	0.0281314	0.476769	0.0529919	-0.425483	0.0886213
ENSRNOG00000013209	Barhl1	117232	blue	0.448778	0.070771	-0.72535	0.000983453	-0.712283	0.00133604	-0.538128	0.0258598	-0.382068	0.130174	0.432269	0.0831187	0.27076	0.293197	0.517282	0.0334609	-0.244732	0.34379	-0.188681	0.4683	-0.351012	0.16714	-0.121852	0.641299	-0.0206504	0.937298	0.0628359	0.810655	0.0826798	0.752403	0.0036136	0.989018	-0.0872301	0.73921
ENSRNOG00000005233	Lrrc6	299920	blue	0.448116	0.0712387	-0.795559	0.000134248	-0.662072	0.00378711	-0.448551	0.0709311	-0.321702	0.207965	0.554212	0.0209685	0.353055	0.164512	0.533753	0.027332	-0.0474781	0.856409	0.0713665	0.78548	0.108703	0.677931	-0.0487434	0.852621	-0.153082	0.557493	0.554253	0.020957	0.659112	0.00400362	-0.584188	0.0137978	-0.269841	0.294902
ENSRNOG00000025792	Crk	54245	blue	-0.445864	0.0728459	0.598707	0.0111072	0.529579	0.0287957	0.596178	0.0115431	0.140212	0.591448	-0.326996	0.200153	0.072215	0.782986	-0.201613	0.437764	0.113946	0.663236	0.189733	0.465777	0.437042	0.079399	0.227991	0.378804	-0.239689	0.354137	0.159802	0.540108	-0.0397367	0.879646	-0.126637	0.628155	0.440733	0.0766072
ENSRNOG00000031514	Olr792	296044	blue	-0.445863	0.0728465	0.784246	0.000194065	0.669308	0.00329765	0.308268	0.228667	0.564228	0.0183082	-0.113161	0.66543	-0.559269	0.0195902	-0.415544	0.0971488	0.212175	0.413612	-0.149074	0.567976	0.30918	0.227222	-0.130115	0.618669	0.377546	0.135166	-0.282954	0.271128	-0.218864	0.398687	0.154766	0.553111	-0.221085	0.393799
ENSRNOG00000023309	Anks6	362515	blue	-0.444548	0.0737972	0.69452	0.00197628	0.342867	0.177894	-0.0151541	0.953967	0.164018	0.529324	0.136452	0.601527	-0.386487	0.12542	0.028544	0.913403	-0.247391	0.338406	-0.332675	0.19199	0.473639	0.0547941	-0.548143	0.0227212	0.566873	0.0176518	-0.216984	0.402853	-0.0435964	0.868048	0.0910971	0.728052	-0.0695443	0.790841
ENSRNOG00000020657	Shc1	85385	blue	-0.443947	0.0742353	0.741214	0.000662341	0.750986	0.000511977	0.541233	0.024853	0.396495	0.115105	-0.412503	0.0998708	-0.221676	0.392503	-0.53206	0.0279185	0.254422	0.324404	0.157971	0.54482	0.34601	0.173692	0.153632	0.55606	-0.0161808	0.950852	-0.0333013	0.899035	-0.123468	0.636849	0.10105	0.699575	0.153149	0.557317
ENSRNOG00000004515	Pes1	289740	blue	0.443265	0.0747342	-0.52346	0.0310503	-0.728121	0.000919606	-0.577091	0.0152876	-0.675642	0.0029126	0.251852	0.329481	0.529434	0.0288477	0.686846	0.00232147	-0.638599	0.00579557	-0.269612	0.295329	-0.288618	0.261233	-0.279576	0.277136	-0.0386517	0.882911	0.0772586	0.768206	0.0807696	0.757961	0.106803	0.683282	0.454155	0.0670566
ENSRNOG00000008764	Otud5	363452	blue	-0.442663	0.075176	0.688105	0.00226169	0.703923	0.00161184	0.414879	0.0977396	0.494913	0.0434049	-0.487231	0.0472891	-0.472412	0.0555128	-0.610044	0.00931116	0.275097	0.285227	0.218975	0.398442	0.0642626	0.806432	-0.01429	0.95659	0.252844	0.327516	-0.239805	0.353897	-0.232001	0.370243	0.038599	0.88307	-0.000435305	0.998677
ENSRNOG00000050315	Dcxr	171408	blue	0.442135	0.075566	-0.78925	0.000165325	-0.663019	0.00371989	-0.387818	0.124012	-0.477772	0.0524238	0.527877	0.0294098	0.492993	0.0443522	0.470944	0.0563819	-0.132448	0.612336	-0.0513229	0.844908	0.153613	0.556108	0.0570206	0.82792	-0.350233	0.168148	0.490522	0.0455943	0.542238	0.0245337	-0.197367	0.447675	-0.167429	0.520676
ENSRNOG00000039448	Olr1076	404961	blue	-0.441877	0.0757565	0.631369	0.00656272	0.464075	0.0605843	0.235721	0.3624	0.391237	0.120446	-0.183935	0.479764	-0.539693	0.0253485	-0.368205	0.145896	0.0630392	0.810053	-0.267579	0.299125	0.00900547	0.972636	-0.135554	0.603945	0.379805	0.132656	-0.502145	0.0399734	-0.461686	0.0620987	0.491103	0.0453001	-0.272654	0.289699
ENSRNOG00000025679	Stk40	360230	blue	-0.441771	0.0758354	0.718012	0.00117047	0.682498	0.00253796	0.307878	0.229287	0.548376	0.0226518	-0.192711	0.458672	-0.60853	0.00953665	-0.551579	0.0217153	0.264685	0.304581	-0.0297738	0.909686	0.247465	0.338256	-0.122258	0.64018	0.369729	0.144107	-0.360888	0.154697	-0.243474	0.346355	0.18397	0.479678	-0.243729	0.345834
ENSRNOG00000027422	Fastkd3	290946	blue	0.441071	0.0763554	-0.741755	0.000653168	-0.441955	0.0756988	-0.107811	0.680441	-0.301391	0.239754	0.0380764	0.884643	0.489924	0.0458988	0.222741	0.390174	0.132701	0.61165	0.484443	0.0487614	-0.192348	0.459535	0.311291	0.223897	-0.488116	0.0468285	0.483082	0.0494924	0.357526	0.15886	-0.627469	0.00700928	0.214956	0.407371
ENSRNOG00000001815	Eif4a2	303831	blue	-0.440913	0.0764726	0.797942	0.000123864	0.447179	0.0719042	0.140301	0.591211	0.287169	0.263743	0.0588615	0.822446	-0.364289	0.150562	-0.0231066	0.929857	-0.182603	0.483006	-0.430497	0.0845305	0.397776	0.113828	-0.363324	0.151728	0.474969	0.054023	-0.306797	0.23101	-0.323862	0.204755	0.333095	0.191395	-0.000281812	0.999144
ENSRNOG00000009446	Rxra	25271	blue	-0.44066	0.0766617	0.82318	4.92e-05	0.623018	0.00754826	0.162285	0.533744	0.521271	0.0318884	-0.164358	0.528461	-0.716236	0.00121987	-0.454475	0.0668405	0.067794	0.796	-0.318476	0.212821	0.0298394	0.909488	-0.299525	0.24282	0.59979	0.0109247	-0.65376	0.00442058	-0.507458	0.0375867	0.508652	0.0370657	-0.260362	0.312842
ENSRNOG00000009906	Slfnl1	500540	blue	-0.440363	0.0768838	0.635225	0.00614401	0.375266	0.137733	0.247567	0.338052	0.146829	0.573883	0.0578483	0.825458	-0.0717636	0.784313	0.130434	0.617799	-0.116765	0.655385	-0.107568	0.681124	0.594699	0.0118044	-0.202449	0.435827	0.18413	0.47929	0.100017	0.702513	0.0122136	0.962893	-0.190049	0.46502	0.224473	0.386401
ENSRNOG00000012497	Olr1626	290002	blue	-0.439996	0.0771588	0.621902	0.00768847	0.638081	0.005848	0.60718	0.0097413	0.406327	0.105567	-0.47924	0.051601	-0.102395	0.695753	-0.413359	0.0990997	0.241755	0.349876	0.11463	0.661329	0.131559	0.614746	0.370961	0.142671	-0.144771	0.579323	-0.157111	0.547038	-0.409114	0.102969	0.341957	0.179124	0.353817	0.16354
ENSRNOG00000038883	LOC294154	294154	blue	-0.439033	0.0778841	0.850486	1.52e-05	0.616948	0.00833627	0.218627	0.399211	0.404445	0.107348	-0.440425	0.0768371	-0.559569	0.0195105	-0.443202	0.0747803	-0.050985	0.845918	-0.169774	0.514768	-0.102393	0.695759	-0.279449	0.277364	0.536368	0.0264447	-0.589814	0.0127002	-0.52304	0.0312096	0.45461	0.0667496	0.0628686	0.810558
ENSRNOG00000020936	Nradd	246143	blue	0.438831	0.0780366	-0.572685	0.0162744	-0.737162	0.000734608	-0.593541	0.012012	-0.558338	0.0198383	0.668347	0.00335948	0.425008	0.0890164	0.698745	0.00180499	-0.472818	0.0552742	-0.43598	0.0802161	0.259193	0.315097	-0.289195	0.260239	-0.0521581	0.842414	0.382351	0.129866	0.600488	0.0108082	-0.0377268	0.885695	-0.111934	0.668861
ENSRNOG00000033010	Akr1c12	364773	blue	-0.4379	0.0787439	0.539466	0.0254223	0.243532	0.346236	0.297475	0.246217	-0.128679	0.622578	-0.0648258	0.804766	0.164512	0.528069	0.16142	0.535959	-0.271662	0.291528	-0.127547	0.625667	0.600686	0.0107754	-0.0779106	0.766301	-0.0709101	0.786822	0.152548	0.558884	0.139862	0.592383	0.0184812	0.943874	0.459135	0.0637469
ENSRNOG00000062002	Kcna3	29731	blue	-0.436769	0.0796085	0.592671	0.01217	0.347837	0.171279	-0.0176161	0.946498	0.391303	0.120378	0.299657	0.242604	-0.561244	0.0190713	0.0164287	0.9501	-0.0160068	0.95138	-0.298945	0.243779	0.425246	0.0888185	-0.495428	0.0431532	0.656168	0.00422886	-0.244815	0.343623	-0.124957	0.632758	-0.0454528	0.862478	-0.389775	0.121962
ENSRNOG00000029574	Rps4x	100362640	blue	0.436023	0.0801827	-0.592987	0.0121124	-0.66864	0.00334056	-0.51054	0.0362528	-0.56505	0.0181023	0.155	0.552504	0.427102	0.0872855	0.500212	0.0408699	-0.465258	0.0598444	-0.139727	0.592745	-0.426402	0.0878607	-0.1545	0.553804	-0.0760423	0.771764	-0.0354191	0.892648	-0.0568651	0.828383	0.151258	0.562252	0.323879	0.20473
ENSRNOG00000057626	Kif1b	117548	blue	-0.435623	0.080492	0.904962	6e-07	0.639677	0.00568765	0.336468	0.186661	0.368047	0.146082	-0.199743	0.442116	-0.362135	0.153172	-0.274492	0.286331	-0.0514061	0.84466	-0.31569	0.217074	0.278338	0.279358	-0.169039	0.516616	0.342018	0.179042	-0.37006	0.14372	-0.468419	0.0579009	0.46263	0.061497	0.0998974	0.702854
ENSRNOG00000026833	Ube4a	315608	blue	-0.43554	0.0805559	0.626623	0.00710927	0.309383	0.226901	0.301792	0.239099	-0.0294506	0.910663	-0.0127067	0.961396	0.0515729	0.844161	0.136859	0.600434	-0.225121	0.384996	-0.193671	0.456393	0.569033	0.0171296	-0.131221	0.615662	0.0270038	0.918061	0.0947743	0.71749	0.0450181	0.863782	-0.00552943	0.983196	0.356734	0.159851
ENSRNOG00000060144	Ankle2	360829	blue	-0.434747	0.0811719	0.835047	3.03e-05	0.6305	0.00666016	0.464072	0.0605864	0.305169	0.233623	-0.494216	0.0437468	-0.278255	0.279508	-0.38466	0.12737	0.00727471	0.977894	-0.0987656	0.706079	-0.00279931	0.991493	0.0212304	0.935541	0.145491	0.577416	-0.35571	0.161139	-0.472393	0.0555242	0.358185	0.158038	0.31517	0.217873
ENSRNOG00000014710	Prom2	192211	blue	0.434509	0.0813573	-0.425186	0.0888684	-0.242575	0.348195	-0.375373	0.137612	0.0610901	0.81583	0.0315209	0.904409	-0.261046	0.311526	-0.141523	0.58795	0.111237	0.670815	0.0833427	0.750477	-0.516604	0.033734	-0.142735	0.584724	0.264594	0.304755	-0.320653	0.209536	-0.173975	0.504262	-0.017103	0.948054	-0.441855	0.0757727
ENSRNOG00000049937	Pdxk	83578	blue	-0.434175	0.0816187	0.81125	7.74e-05	0.530448	0.0284862	0.0785525	0.764426	0.470837	0.0564457	0.0473143	0.856899	-0.655558	0.00427674	-0.200105	0.441272	-0.0340914	0.896651	-0.383037	0.129121	0.214811	0.407694	-0.46026	0.0630159	0.710052	0.00140552	-0.513901	0.0348399	-0.449854	0.0700161	0.314318	0.219187	-0.296919	0.247144
ENSRNOG00000012098	Adcyap1r1	24167	blue	-0.434112	0.0816679	0.8871	2.07e-06	0.567028	0.017614	0.133836	0.60858	0.417144	0.0957378	-0.0609826	0.816149	-0.56934	0.0170564	-0.237123	0.359468	-0.0991109	0.705095	-0.444208	0.0740448	0.190004	0.465129	-0.382985	0.129177	0.603798	0.0102696	-0.532484	0.0277709	-0.460697	0.0627337	0.488388	0.0466877	-0.111942	0.668839
ENSRNOG00000022445	Iqcf3	501050	blue	0.43333	0.0822807	-0.652197	0.0045487	-0.570825	0.0167056	-0.440634	0.0766815	-0.412895	0.0995167	0.383334	0.128799	0.188487	0.468764	0.240792	0.351858	-0.152984	0.557747	-0.125101	0.632365	-0.0925021	0.724011	-0.0825762	0.752704	-0.12267	0.639044	0.0315188	0.904415	0.282709	0.271562	0.05462	0.835069	-0.227749	0.379323
ENSRNOG00000019014	Ndst1	29633	blue	-0.431892	0.0834176	0.822137	5.13e-05	0.670539	0.00321973	0.534815	0.0269688	0.249933	0.333304	-0.578791	0.0149198	-0.141434	0.588189	-0.391313	0.120369	0.0258339	0.9216	0.0610591	0.815922	0.0495361	0.850249	0.098825	0.70591	0.0192082	0.94167	-0.240478	0.352507	-0.435145	0.0808623	0.239811	0.353883	0.492284	0.0447057
ENSRNOG00000042903	Cox7a2	29507	blue	0.431611	0.0836409	-0.779507	0.000225038	-0.677781	0.00279116	-0.557352	0.020104	-0.209195	0.420352	0.428288	0.0863157	0.0877523	0.737701	0.443884	0.0742813	-0.0747685	0.775494	-0.0210661	0.936038	-0.400059	0.11158	-0.134773	0.606049	0.10157	0.698097	0.0256921	0.922029	0.112047	0.668546	-0.257007	0.319341	-0.302577	0.237819
ENSRNOG00000048637	Olr1022	405965	blue	-0.431362	0.0838391	0.50938	0.0367506	0.0546336	0.835029	-0.161659	0.535347	-0.089589	0.732398	-0.0460928	0.86056	-0.271842	0.291196	0.145558	0.577241	-0.531927	0.027965	-0.481524	0.0503393	0.00174898	0.994685	-0.560653	0.0192256	0.571213	0.0166149	-0.456645	0.0653867	-0.275902	0.283762	0.565493	0.0179919	0.111769	0.669323
ENSRNOG00000020748	Map4	367171	blue	-0.4307	0.0843682	0.842728	2.17e-05	0.62797	0.00695055	0.448819	0.0707426	0.247417	0.338354	-0.3954	0.116203	-0.134237	0.607496	-0.2891	0.260403	-0.042778	0.870505	-0.119474	0.647868	0.241517	0.350366	0.0255572	0.922437	0.0668269	0.798854	-0.166464	0.523116	-0.27138	0.292049	0.317715	0.213977	0.407798	0.10419
ENSRNOG00000004637	Fbxo7	366854	blue	0.43043	0.0845849	-0.713578	0.00129703	-0.576244	0.0154736	-0.177869	0.494612	-0.578171	0.015053	0.0876757	0.737922	0.756264	0.000443372	0.480411	0.0509511	-0.159298	0.541402	0.334108	0.189965	-0.0508957	0.846185	0.237202	0.359303	-0.577818	0.0151293	0.630367	0.0066752	0.531735	0.0280322	-0.555297	0.0206664	0.494498	0.0436082
ENSRNOG00000020881	Frmd8	309172	blue	-0.429679	0.0851888	0.589313	0.0127949	0.496955	0.0424143	0.522497	0.0314169	0.1233	0.637311	-0.310038	0.225867	0.178016	0.49425	-0.100239	0.701883	0.0323452	0.90192	0.11683	0.655203	0.398312	0.113298	0.251825	0.329535	-0.254328	0.324589	0.159636	0.540534	-0.0802033	0.759611	0.0177538	0.94608	0.5909	0.0124965
ENSRNOG00000000505	Rpl10a	81729	blue	0.428876	0.0858376	-0.776662	0.000245536	-0.817383	6.16e-05	-0.561176	0.0190892	-0.627569	0.00699751	0.509991	0.0364879	0.552067	0.0215755	0.693366	0.00202535	-0.410702	0.101509	-0.180795	0.487424	0.0109696	0.966671	-0.128611	0.622765	-0.202923	0.43473	0.391942	0.119721	0.489325	0.0462053	-0.112118	0.668346	0.0393404	0.880838
ENSRNOG00000007032	Amigo2	300186	blue	0.428293	0.0863115	-0.584214	0.0137925	-0.304196	0.235192	0.0554688	0.83254	-0.208407	0.422145	0.240061	0.353368	0.650429	0.00469728	0.318451	0.21286	0.193808	0.45607	0.293564	0.25278	0.199771	0.442049	0.503984	0.0391345	-0.69104	0.00212722	0.660822	0.00387738	0.373486	0.13976	-0.509349	0.0367639	0.268433	0.297527
ENSRNOG00000024382	Fcgr3a	304966	blue	0.427501	0.0869585	-0.662677	0.00374406	-0.714875	0.00125889	-0.364373	0.150461	-0.739354	0.00069475	0.1534	0.556664	0.730854	0.000860034	0.585439	0.0135475	-0.46185	0.0619936	0.0224607	0.931813	-0.0399663	0.878956	0.00329469	0.989987	-0.417495	0.0954298	0.471352	0.0561395	0.516424	0.0338071	-0.204935	0.43009	0.493389	0.0441556
ENSRNOG00000037500	Pus1	304567	blue	0.42664	0.0876652	-0.801598	0.000109252	-0.546768	0.0231335	-0.343621	0.17688	-0.184297	0.478883	0.559975	0.0194034	0.28001	0.276359	0.353605	0.163809	0.143574	0.582496	0.121624	0.641927	0.118749	0.649877	0.0981331	0.707883	-0.248604	0.335966	0.50216	0.0399666	0.52958	0.0287956	-0.499099	0.0413926	-0.375836	0.137089
ENSRNOG00000004763	Sirpa	25528	blue	-0.426556	0.087734	0.765349	0.000343208	0.78086	0.000215801	0.435308	0.0807362	0.635676	0.00609647	-0.495271	0.0432298	-0.519863	0.0324372	-0.60669	0.00981647	0.314195	0.219377	0.165706	0.525036	-0.014215	0.956817	0.0171964	0.947771	0.322389	0.206941	-0.353366	0.164114	-0.483176	0.0494416	0.139692	0.592838	0.0137588	0.958202
ENSRNOG00000000956	Rasl11a	304268	blue	0.42614	0.0880777	-0.537377	0.0261083	-0.255128	0.323017	0.0702462	0.788775	-0.208366	0.422239	0.258892	0.31568	0.583327	0.013972	0.229629	0.375295	0.224458	0.386434	0.307803	0.229407	0.304246	0.23511	0.425224	0.0888368	-0.654324	0.00437505	0.748293	0.000550253	0.539599	0.0253791	-0.609536	0.00938631	0.148853	0.568555
ENSRNOG00000017780	Akr7a2	171445	blue	0.425976	0.0882131	-0.641661	0.00549324	-0.518721	0.032887	-0.243696	0.345901	-0.443905	0.0742654	0.506909	0.0378281	0.655824	0.00425581	0.570385	0.0168089	-0.108487	0.678538	0.105754	0.686243	0.390544	0.121163	0.105018	0.688323	-0.444024	0.074179	0.69681	0.00188185	0.552097	0.0215668	-0.520908	0.0320294	0.132284	0.61278
ENSRNOG00000014928	Apba1	83589	blue	-0.425041	0.0889887	0.70055	0.00173562	0.594584	0.0118248	0.503245	0.03947	0.359317	0.156632	-0.286073	0.265651	-0.164041	0.529267	-0.210328	0.417783	0.160117	0.539298	0.0591656	0.821543	0.321826	0.207781	0.132959	0.610952	0.0468879	0.858177	-0.0509453	0.846036	-0.188754	0.468125	-0.041384	0.874693	0.172448	0.508067
ENSRNOG00000007478	Cry2	170917	blue	-0.423636	0.0901633	0.754639	0.000463629	0.340401	0.18124	-0.0354331	0.892606	0.183751	0.48021	0.0600876	0.818805	-0.473639	0.0547938	-0.0343482	0.895877	-0.30097	0.240444	-0.524878	0.0305161	0.184046	0.479495	-0.522984	0.0312308	0.603617	0.0102985	-0.499749	0.0410868	-0.335768	0.187637	0.439438	0.0775785	-0.0488911	0.852179
ENSRNOG00000020845	Tyrobp	361537	blue	0.423563	0.0902252	-0.615907	0.0084778	-0.440765	0.076583	-0.163841	0.529775	-0.291159	0.256869	0.0783754	0.764943	0.464986	0.060014	0.292045	0.255358	-0.0187817	0.942963	0.19487	0.453556	-0.274548	0.286229	0.26832	0.297738	-0.407558	0.104413	0.22757	0.379709	0.025564	0.922417	-0.215978	0.405091	0.277616	0.28066
ENSRNOG00000021125	Prdx5	113898	blue	0.421174	0.0922488	-0.645534	0.00512925	-0.517613	0.0333284	-0.557817	0.0199785	-0.146689	0.574254	0.637883	0.00586812	-0.0184736	0.943897	0.281577	0.273568	-0.0194092	0.941061	-0.172516	0.507897	0.0188285	0.942821	-0.231654	0.370981	0.148425	0.569681	0.0634784	0.808753	0.236287	0.361215	-0.0815041	0.755823	-0.599245	0.0110163
ENSRNOG00000016532	Ino80c	291737	blue	-0.420776	0.0925896	0.561857	0.0189126	0.302021	0.238726	0.366052	0.148449	-0.0933489	0.721578	-0.0538886	0.83725	0.294884	0.250553	0.198482	0.445062	-0.222579	0.390527	-0.0875804	0.738198	0.673851	0.00301752	0.011144	0.966141	-0.172433	0.508105	0.35437	0.162835	0.176002	0.499227	-0.062686	0.811099	0.530149	0.0285924
ENSRNOG00000025592	Tspan31	362890	blue	0.42077	0.0925944	-0.77213	0.000281415	-0.527836	0.0294247	-0.125033	0.632551	-0.482267	0.0499344	0.109204	0.67652	0.671384	0.00316713	0.338941	0.18324	0.000982027	0.997015	0.418255	0.0947667	0.0496326	0.849961	0.308695	0.227989	-0.608854	0.00948804	0.678432	0.00275506	0.643597	0.00530876	-0.595009	0.0117492	0.281096	0.274422
ENSRNOG00000002813	Dars2	304919	blue	0.420566	0.0927698	-0.681439	0.00259312	-0.744817	0.000603136	-0.578198	0.0150473	-0.491658	0.04502	0.458365	0.0642508	0.322399	0.206925	0.635652	0.00609906	-0.33183	0.19319	-0.058486	0.823562	-0.0290656	0.911827	-0.286809	0.264369	0.0247111	0.924998	0.370512	0.143193	0.615647	0.00851343	-0.494919	0.0434018	-0.0871459	0.739454
ENSRNOG00000015095	Spryd7	290303	blue	0.419913	0.0933309	-0.738597	0.000708306	-0.626343	0.00714257	-0.453391	0.0675755	-0.26745	0.299367	0.26862	0.297177	0.182748	0.482653	0.401512	0.110165	-0.0810964	0.757009	0.0987521	0.706117	-0.436387	0.0799022	-0.0441702	0.866326	-0.0256847	0.922052	0.0336735	0.897912	0.0738167	0.778285	-0.308466	0.228352	-0.0706126	0.787697
ENSRNOG00000010825	Snapc3	362537	blue	0.419219	0.0939299	-0.696481	0.00189522	-0.339354	0.182673	0.0285744	0.913311	-0.259812	0.313903	0.0632342	0.809475	0.582787	0.0140823	0.164697	0.527598	0.216024	0.404988	0.473054	0.0551361	-0.0336741	0.89791	0.479875	0.0512476	-0.667256	0.00343092	0.542114	0.024573	0.301485	0.239601	-0.501487	0.0402769	0.285075	0.267396
ENSRNOG00000028919	Zfp868	494340	blue	0.419025	0.0940977	-0.61396	0.00874773	-0.672619	0.00309154	-0.487393	0.0472044	-0.531131	0.0282447	0.109145	0.676687	0.335939	0.187399	0.484494	0.048734	-0.38178	0.130488	0.0287142	0.912889	-0.455824	0.0659336	-0.197559	0.447223	-0.0184028	0.944112	0.0472319	0.857146	0.143942	0.58152	-0.221962	0.391877	0.267393	0.299474
ENSRNOG00000026691	Coq4	366013	blue	-0.417105	0.0957718	0.719683	0.00112549	0.430906	0.0842036	0.0973099	0.710234	0.419594	0.0936056	0.0815477	0.755696	-0.561177	0.0190887	-0.0555043	0.832434	-0.0335292	0.898347	-0.329434	0.196622	0.174027	0.50413	-0.394918	0.116689	0.619714	0.00796945	-0.431228	0.0839458	-0.417222	0.0956696	0.121914	0.641128	-0.19515	0.452894
ENSRNOG00000020744	Adar	81635	blue	-0.416646	0.0961751	0.795517	0.000134439	0.333902	0.190255	0.0358766	0.891269	0.0894319	0.732851	-0.00960856	0.970804	-0.278375	0.279291	0.0836192	0.749674	-0.39523	0.116374	-0.484117	0.0489359	0.334269	0.189738	-0.490528	0.045591	0.526451	0.0299321	-0.304702	0.234374	-0.195727	0.451533	0.369114	0.144826	0.134847	0.60585
ENSRNOG00000031730	Eloc	64525	blue	0.416594	0.0962209	-0.539783	0.0253195	-0.189461	0.466428	-0.0762968	0.771019	-0.097843	0.708711	-0.0855671	0.744024	0.080547	0.75861	-0.307082	0.230556	0.247584	0.338017	0.231705	0.370872	-0.369136	0.1448	0.307569	0.229779	-0.334616	0.189251	-0.0932536	0.721852	-0.0806063	0.758437	0.150708	0.563689	-0.153832	0.55554
ENSRNOG00000013388	Pgap1	316400	blue	-0.416561	0.0962497	0.855197	1.21e-05	0.545372	0.0235582	0.216935	0.402962	0.288889	0.260766	-0.114324	0.662181	-0.349507	0.169093	-0.123888	0.635694	-0.134944	0.60559	-0.262158	0.309394	0.329207	0.196948	-0.334903	0.188847	0.454565	0.0667799	-0.28934	0.25999	-0.315409	0.217506	0.201954	0.436974	0.120649	0.64462
ENSRNOG00000006082	Rmdn2	313840	blue	0.416538	0.0962702	-0.595632	0.011639	-0.477426	0.0526194	-0.150053	0.565405	-0.600903	0.0107396	0.29775	0.245761	0.71478	0.00126164	0.348118	0.170909	-0.160916	0.537247	0.125919	0.630121	0.382635	0.129557	0.168012	0.519204	-0.633944	0.00628068	0.726122	0.000965314	0.727265	0.000938959	-0.364243	0.150617	0.283544	0.270087
ENSRNOG00000022736	Cdkn2aip	306455	blue	0.416374	0.0964152	-0.636932	0.00596571	-0.510784	0.036149	-0.12333	0.637228	-0.665481	0.00354964	-0.0419763	0.872913	0.68067	0.00263375	0.173446	0.505579	-0.216562	0.403791	0.142767	0.584641	-0.101089	0.699463	0.268843	0.296761	-0.662116	0.00378397	0.406773	0.105148	0.400921	0.110739	0.0211784	0.935698	0.403889	0.107878
ENSRNOG00000030869	Aldoart2	299052	blue	0.415042	0.0975944	-0.699302	0.00178334	-0.603745	0.010278	-0.566105	0.0178405	-0.201943	0.437	0.281971	0.272868	-0.0185541	0.943653	0.291766	0.255834	-0.0865276	0.741243	0.0110659	0.966378	-0.529178	0.0289397	-0.224055	0.38731	0.211168	0.415882	-0.0564248	0.829693	0.0835745	0.749804	-0.200885	0.439455	-0.365908	0.14862
ENSRNOG00000019423	Dvl1	83721	blue	-0.414933	0.0976909	0.798692	0.000120741	0.649582	0.00476986	0.173047	0.506572	0.641928	0.00546755	-0.180908	0.487146	-0.797557	0.000125494	-0.460971	0.0625575	0.159335	0.541306	-0.215864	0.405345	-0.0733649	0.77961	-0.308288	0.228635	0.693026	0.00203998	-0.716318	0.00121756	-0.67903	0.00272219	0.380202	0.132218	-0.291688	0.255966
ENSRNOG00000019772	Dnpep	301529	blue	0.414296	0.0982595	-0.713513	0.00129895	-0.544909	0.0237005	-0.476336	0.0532388	-0.198975	0.443908	0.565625	0.0179593	0.17892	0.492024	0.385876	0.12607	-0.00239933	0.992708	0.0231912	0.929601	0.0553459	0.832906	-0.123946	0.635535	-0.00565782	0.982806	0.298656	0.244257	0.336323	0.186863	-0.349063	0.169673	-0.383633	0.128476
ENSRNOG00000016781	Ppib	64367	blue	0.413808	0.0986962	-0.771377	0.000287779	-0.498663	0.0415991	-0.0980139	0.708224	-0.489814	0.0459547	0.0128206	0.96105	0.627101	0.00705258	0.193225	0.457452	0.0286874	0.91297	0.393003	0.118634	-0.0838159	0.749103	0.374425	0.138688	-0.661933	0.00379705	0.566292	0.0177944	0.539395	0.0254452	-0.406139	0.105744	0.196341	0.450088
ENSRNOG00000025637	Saxol1	317471	blue	0.413789	0.0987135	-0.215212	0.406799	-0.168857	0.517073	-0.410404	0.101781	0.152514	0.558973	0.314374	0.2191	-0.367508	0.146719	-0.0910607	0.728157	0.0588855	0.822375	-0.298892	0.243867	-0.259977	0.313584	-0.258949	0.315569	0.35472	0.162391	-0.328946	0.197325	-0.143564	0.582522	0.167406	0.520733	-0.601003	0.010723
ENSRNOG00000034233	Fyttd1	360726	blue	-0.413146	0.0992912	0.765801	0.000338766	0.468553	0.0578192	0.0781589	0.765576	0.344206	0.176095	-0.136809	0.600566	-0.526738	0.0298262	-0.225561	0.384043	-0.151206	0.562387	-0.380447	0.131948	0.0181768	0.944797	-0.392653	0.118991	0.594269	0.0118812	-0.57512	0.0157231	-0.577047	0.0152971	0.527809	0.0294344	-0.0647492	0.804992
ENSRNOG00000011631	Fst	24373	blue	0.411895	0.100421	-0.841062	2.34e-05	-0.755093	0.000457887	-0.385541	0.126427	-0.579146	0.0148437	0.398051	0.113556	0.564313	0.0182869	0.582403	0.0141612	-0.212435	0.413026	0.0850521	0.745517	-0.0540464	0.836779	0.0356035	0.892092	-0.357289	0.159156	0.47997	0.0511949	0.477244	0.0527225	-0.387923	0.123902	0.0838834	0.748907
ENSRNOG00000047816	Ccs	84485	blue	0.409983	0.102168	-0.809965	8.12e-05	-0.740855	0.000668507	-0.471886	0.055823	-0.488082	0.046846	0.579173	0.014838	0.504336	0.0389757	0.660914	0.00387064	-0.190502	0.463937	0.0254076	0.92289	0.155292	0.551747	-0.0504965	0.847378	-0.255948	0.321411	0.571463	0.0165567	0.651961	0.00456836	-0.528673	0.0291213	-0.0746143	0.775946
ENSRNOG00000019450	Etf1	307503	blue	0.409769	0.102365	-0.690105	0.00216934	-0.435654	0.0804682	-0.232559	0.369061	-0.25273	0.327742	0.27922	0.277774	0.287609	0.262981	0.206975	0.425413	0.129732	0.619709	0.270604	0.293485	-0.0381836	0.88432	0.158323	0.543913	-0.314717	0.218572	0.333819	0.190371	0.415172	0.0974789	-0.488374	0.0466953	-0.10957	0.675492
ENSRNOG00000014037	Dcun1d3	309035	blue	-0.409113	0.10297	0.743574	0.000623056	0.454561	0.0667826	0.155483	0.551252	0.276044	0.283505	0.136025	0.602675	-0.34464	0.175516	-0.0407727	0.876531	-0.0898361	0.731685	-0.37616	0.136722	0.460839	0.0626421	-0.29474	0.250796	0.381065	0.13127	-0.244178	0.344919	-0.18562	0.475679	0.216975	0.402874	-0.0217746	0.933892
ENSRNOG00000007370	Rnf144a	500636	blue	-0.40773	0.104253	0.700494	0.00173773	0.693233	0.00203105	0.468107	0.0580903	0.437508	0.0790427	-0.706739	0.00151418	-0.420844	0.092531	-0.634955	0.00617266	0.226161	0.382747	0.230335	0.373787	-0.227333	0.380218	0.10622	0.684928	0.181898	0.484726	-0.438502	0.0782859	-0.472636	0.0553809	0.206196	0.427196	0.176794	0.497268
ENSRNOG00000016704	Pcyox1	246302	blue	-0.406999	0.104937	0.767213	0.000325193	0.486361	0.0477448	0.125082	0.632417	0.294927	0.250481	0.0921621	0.724988	-0.452794	0.0679834	-0.144335	0.580479	-0.0790149	0.763077	-0.37561	0.137344	0.388702	0.123084	-0.357992	0.158278	0.466112	0.0593145	-0.353011	0.164569	-0.233799	0.36644	0.274059	0.287122	-0.123009	0.638111
ENSRNOG00000014455	LOC499136	499136	blue	0.404897	0.106918	-0.685137	0.00240471	-0.318794	0.212339	-0.144303	0.580563	0.0369597	0.888006	0.00599318	0.981787	0.0552526	0.833184	-0.0409565	0.875978	0.33767	0.184994	0.353505	0.163938	-0.579283	0.0148145	0.327961	0.198751	-0.222402	0.390913	-0.0351491	0.893462	-0.134536	0.60669	-0.256212	0.320894	-0.195007	0.453232
ENSRNOG00000011882	Gab2	84477	blue	-0.404746	0.107061	0.818072	6e-05	0.448631	0.0708751	0.211351	0.415469	0.0774803	0.767558	-0.239731	0.354051	-0.174903	0.501954	-0.089927	0.731423	-0.295051	0.250272	-0.289193	0.260242	0.267975	0.298383	-0.281906	0.272982	0.289273	0.260105	-0.261631	0.310403	-0.218269	0.400004	0.327526	0.199382	0.371354	0.142215
ENSRNOG00000001111	Brca2	360254	blue	0.404327	0.10746	-0.579445	0.01478	-0.58236	0.01417	-0.570051	0.0168878	-0.256581	0.320172	0.639794	0.00567606	0.04834	0.853828	0.435916	0.0802651	-0.165427	0.525745	-0.196521	0.449663	0.0607932	0.816711	-0.354564	0.162589	0.168268	0.518559	0.182474	0.483321	0.34623	0.173399	-0.311712	0.223239	-0.436563	0.0797666
ENSRNOG00000061100	Tmem150a	245966	blue	0.403735	0.108025	-0.641883	0.0054719	-0.3963	0.115299	-0.0798994	0.760497	-0.4093	0.102797	-0.212754	0.412307	0.573412	0.0161083	0.0768397	0.769431	-0.0359713	0.890983	0.379725	0.132744	-0.298113	0.245158	0.323641	0.205082	-0.530176	0.0285828	0.398296	0.113314	0.247998	0.337183	-0.144524	0.579977	0.365872	0.148664
ENSRNOG00000009066	Thra	81812	blue	-0.403641	0.108115	0.559194	0.0196099	0.601373	0.0106621	0.388858	0.12292	0.606954	0.00977597	-0.450566	0.0695195	-0.572483	0.0163208	-0.530326	0.0285295	0.3782	0.134436	0.133573	0.609291	-0.35341	0.164059	0.127748	0.62512	0.285017	0.267498	-0.511031	0.0360439	-0.632803	0.00640444	0.157159	0.546915	-0.182086	0.484268
ENSRNOG00000001158	Abcg1	85264	blue	-0.403095	0.108638	0.651754	0.00458555	0.395924	0.115676	0.325953	0.201677	0.0126702	0.961507	-0.0553249	0.832969	0.115482	0.658952	0.0333617	0.898853	-0.183144	0.481688	-0.21807	0.400443	0.532769	0.0276717	-0.0307193	0.90683	-0.0671628	0.797862	0.10905	0.676955	-0.0302824	0.90815	0.199599	0.442451	0.436827	0.0795642
ENSRNOG00000021438	Tuba1c	300218	blue	0.400532	0.111118	-0.56668	0.0176992	-0.520422	0.0322186	-0.45853	0.0641426	-0.259379	0.314738	0.0666513	0.799372	0.15045	0.564366	0.265397	0.303234	-0.186956	0.47245	-0.00639984	0.980552	-0.499352	0.0412735	-0.0981069	0.707958	0.0763059	0.770992	-0.0353593	0.892828	0.0911554	0.727885	0.00840965	0.974446	-0.0582257	0.824336
ENSRNOG00000052305	Cnot10	316034	blue	0.400115	0.111525	-0.547637	0.0228722	-0.529618	0.0287819	-0.463449	0.0609782	-0.273651	0.28787	0.170802	0.512187	0.119513	0.647763	0.315433	0.217469	-0.183019	0.481992	0.0448999	0.864136	-0.30075	0.240805	-0.23932	0.3549	0.140264	0.591309	0.163695	0.530147	0.320036	0.210464	-0.325608	0.202183	-0.1531	0.557444
ENSRNOG00000011854	RGD1563986	312270	blue	-0.399081	0.112539	0.778486	0.000232224	0.692073	0.00208145	0.485926	0.047974	0.364296	0.150553	-0.669105	0.00331065	-0.285728	0.266254	-0.529981	0.0286522	0.0981637	0.707796	0.0993158	0.704511	-0.137051	0.599918	0.103222	0.69341	0.123737	0.63611	-0.422143	0.0914241	-0.558998	0.0196621	0.367359	0.146896	0.403046	0.108685
ENSRNOG00000026049	Qrsl1	309911	blue	0.398751	0.112864	-0.669879	0.00326134	-0.3411	0.180288	-0.115353	0.659314	-0.0940098	0.719682	-0.110057	0.674124	0.173475	0.505506	-0.0398993	0.879157	0.239983	0.353529	0.389548	0.122199	-0.579871	0.0146897	0.298375	0.244723	-0.274219	0.286829	0.119952	0.646546	0.0266143	0.919239	-0.26886	0.29673	-0.0538009	0.837511
ENSRNOG00000000590	Naglt1	337920	blue	0.397048	0.114553	-0.474803	0.0541188	-0.278817	0.278497	-0.399171	0.112451	0.111235	0.67082	0.0614217	0.814846	-0.337863	0.184726	-0.183285	0.481344	0.149162	0.567743	-0.0258656	0.921504	-0.728559	0.000909831	-0.0795236	0.761593	0.25175	0.329684	-0.480963	0.0506469	-0.347746	0.171399	0.212177	0.413606	-0.47605	0.0534021
ENSRNOG00000002450	Rrp15	360895	blue	0.396147	0.115453	-0.651581	0.00460005	-0.296369	0.248063	-0.197846	0.44655	0.0528897	0.84023	0.023021	0.930116	0.0288354	0.912522	-0.0408094	0.87642	0.292976	0.253777	0.334015	0.190095	-0.58258	0.0141248	0.224299	0.38678	-0.118337	0.65102	-0.0673639	0.797269	-0.222499	0.390702	-0.193894	0.455866	-0.172808	0.507168
ENSRNOG00000049770	Cryba4	64348	blue	0.394934	0.116673	-0.632744	0.00641084	-0.722257	0.00105902	-0.578545	0.0149724	-0.455988	0.0658243	0.603959	0.0102439	0.331658	0.193435	0.656115	0.00423298	-0.340706	0.180824	-0.225187	0.384854	0.144484	0.580082	-0.29171	0.255928	0.0101201	0.96925	0.446123	0.0726599	0.648587	0.00485623	-0.349614	0.168953	-0.206612	0.426243
ENSRNOG00000014811	Cyhr1	100362155	blue	0.394362	0.117251	-0.655492	0.00428192	-0.51399	0.0348031	-0.466566	0.0590346	-0.102829	0.694523	0.564923	0.0181338	0.121659	0.641831	0.425888	0.0882856	0.0312894	0.905108	0.0113354	0.96556	0.00602658	0.981686	-0.10739	0.681628	0.0452607	0.863054	0.254783	0.323694	0.329651	0.196309	-0.425911	0.0882663	-0.326912	0.200276
ENSRNOG00000008628	Ica1	81024	blue	0.393131	0.118503	-0.822011	5.16e-05	-0.612493	0.00895555	-0.342925	0.177817	-0.290561	0.257893	0.45817	0.0643788	0.347265	0.172031	0.439601	0.0774557	0.0408894	0.87618	0.17568	0.500024	-0.0194926	0.940808	0.0957174	0.714788	-0.2609	0.311807	0.387737	0.124098	0.398417	0.113194	-0.482061	0.0500461	-0.128595	0.622808
ENSRNOG00000001769	Tnk2	303882	blue	-0.392747	0.118895	0.726222	0.00096299	0.526809	0.0298002	0.155798	0.550437	0.478824	0.0518333	-0.145284	0.577965	-0.585774	0.013481	-0.330989	0.19439	0.0241556	0.92668	-0.330249	0.195449	-0.0617979	0.813731	-0.250953	0.33127	0.535425	0.026762	-0.593642	0.0119938	-0.624694	0.00734151	0.539522	0.025404	-0.122381	0.639841
ENSRNOG00000014187	Igf1r	25718	blue	0.39167	0.12	-0.695481	0.00193622	-0.405154	0.106675	-0.102197	0.696316	-0.115287	0.659497	0.24714	0.338912	0.363019	0.152098	0.237819	0.358018	0.235162	0.363573	0.308608	0.228127	0.0360373	0.890785	0.310019	0.225897	-0.397919	0.113687	0.591372	0.0124088	0.519959	0.0323993	-0.588988	0.0128568	-0.160998	0.537038
ENSRNOG00000059373	M6pr	312689	blue	-0.391667	0.120003	0.381679	0.130598	0.294776	0.250735	0.504973	0.0386891	-0.0878564	0.7374	-0.398167	0.113441	0.39613	0.11547	0.0236129	0.928323	-0.0816544	0.755385	0.181247	0.486317	0.28145	0.273793	0.320837	0.209261	-0.3863	0.125619	0.283415	0.270314	-0.0155585	0.95274	0.0613054	0.815191	0.697897	0.00183837
ENSRNOG00000058652	Akp3	64621	blue	0.39139	0.120289	-0.537961	0.0259148	-0.465714	0.059561	-0.361998	0.15334	-0.204717	0.430592	0.167904	0.519477	0.121756	0.641564	0.218732	0.39898	-0.103162	0.693579	-0.120067	0.646228	-0.590825	0.0125106	0.00181671	0.994479	-0.0270388	0.917955	-0.194872	0.453551	-0.310379	0.22533	0.199284	0.443187	-0.0387586	0.882589
ENSRNOG00000061751	Defa10	613221	blue	0.391382	0.120297	-0.734148	0.000792501	-0.670419	0.00322728	-0.510996	0.0360585	-0.525572	0.0302574	0.484749	0.048598	0.287596	0.263002	0.364193	0.150678	-0.237832	0.357991	-0.0969594	0.711235	0.0138566	0.957905	-0.166808	0.522246	-0.149565	0.566687	0.184531	0.478316	0.401149	0.110517	-0.0684635	0.794026	-0.165132	0.526494
ENSRNOG00000000464	Rxrb	361801	blue	-0.390949	0.120744	0.810806	7.87e-05	0.394219	0.117396	0.167944	0.519376	0.0277159	0.915907	-0.0395889	0.880091	-0.163089	0.531692	-0.00470147	0.985712	-0.341846	0.179274	-0.468211	0.0580273	0.394698	0.116911	-0.329778	0.196127	0.282737	0.271511	-0.247582	0.33802	-0.225075	0.385095	0.422026	0.0915232	0.241454	0.350496
ENSRNOG00000001396	Mospd3	288557	blue	0.389522	0.122226	-0.801198	0.000110775	-0.522941	0.0312473	-0.210833	0.416639	-0.319658	0.211034	0.456477	0.0654983	0.494028	0.0438399	0.338609	0.183696	0.126503	0.628522	0.228442	0.377836	0.264511	0.304912	0.248886	0.335401	-0.505714	0.0383579	0.698686	0.00180732	0.714025	0.00128377	-0.541079	0.0249023	-0.163131	0.531586
ENSRNOG00000005248	Slc1a4	305540	blue	-0.389398	0.122355	0.760159	0.000397799	0.764804	0.000348629	0.416027	0.0967209	0.685535	0.00238512	-0.406319	0.105574	-0.53065	0.0284144	-0.563967	0.0183739	0.333833	0.190352	0.052299	0.841993	0.0357597	0.891621	0.0501463	0.848425	0.336803	0.186195	-0.338613	0.183691	-0.439433	0.0775824	0.218026	0.400542	-0.118103	0.651667
ENSRNOG00000023799	Pak1ip1	361232	blue	0.388557	0.123236	-0.803772	0.000101272	-0.450979	0.069233	-0.212335	0.413249	-0.189431	0.466499	0.247638	0.337909	0.257736	0.317923	0.111145	0.671073	0.231108	0.372141	0.337135	0.185734	-0.158716	0.542899	0.246368	0.340472	-0.361903	0.153456	0.317816	0.213824	0.319303	0.21157	-0.402773	0.108947	-0.181759	0.485064
ENSRNOG00000018797	Myrip	360034	blue	-0.388521	0.123273	0.681004	0.00261606	0.466683	0.0589622	-0.0534663	0.838509	0.527629	0.0294999	-0.0131026	0.960194	-0.820769	5.41e-05	-0.316136	0.216388	0.0256843	0.922053	-0.31592	0.21672	-0.0617023	0.814014	-0.506966	0.0378031	0.822362	5.09e-05	-0.673175	0.00305795	-0.475929	0.0534712	0.317276	0.214646	-0.429313	0.0854838
ENSRNOG00000010021	Isy1	362394	blue	0.388403	0.123397	-0.797084	0.000127524	-0.809755	8.18e-05	-0.507962	0.037366	-0.685387	0.00239237	0.376991	0.135788	0.471337	0.0561482	0.559835	0.0194403	-0.356417	0.16025	-0.00354557	0.989225	-0.0633917	0.809009	-0.148973	0.568239	-0.231538	0.371227	0.399497	0.11213	0.62453	0.00736159	-0.347696	0.171464	0.00562094	0.982918
ENSRNOG00000015749	Nme3	85269	blue	0.388062	0.123755	-0.812343	7.44e-05	-0.758475	0.000417001	-0.488176	0.0467974	-0.548273	0.0226824	0.654663	0.00434784	0.472759	0.0553088	0.636015	0.00606102	-0.227245	0.380408	-0.0576678	0.825995	0.227317	0.380254	-0.0968449	0.711563	-0.249636	0.333897	0.486034	0.0479171	0.613452	0.00881912	-0.377973	0.134689	-0.131164	0.615816
ENSRNOG00000053288	Ank3	361833	blue	-0.386675	0.12522	0.814664	6.83e-05	0.742689	0.000637549	0.522286	0.0314975	0.482883	0.0495998	-0.440192	0.0770118	-0.280726	0.275081	-0.439759	0.0773372	0.180732	0.487578	0.000267588	0.999187	0.101208	0.699127	0.128415	0.623299	0.130559	0.61746	-0.328334	0.19821	-0.583261	0.0139855	0.344718	0.175411	0.283278	0.270555
ENSRNOG00000002468	Tnr	25567	blue	-0.386174	0.125753	0.658591	0.0040428	0.489973	0.0458736	0.502287	0.0399083	0.138607	0.595742	-0.340182	0.181539	0.135933	0.602924	-0.077312	0.76805	-0.0475797	0.856105	-0.000502442	0.998473	0.296949	0.247093	0.172092	0.508958	-0.148031	0.570717	0.0671838	0.7978	-0.235429	0.363013	0.133976	0.608202	0.611332	0.00912275
ENSRNOG00000004723	Fcf1	299198	blue	0.385173	0.126821	-0.776528	0.00024654	-0.66454	0.00361394	-0.456048	0.0657841	-0.283175	0.270737	0.235935	0.361952	0.143392	0.582981	0.373197	0.140092	-0.0781014	0.765743	0.0841674	0.748083	-0.527157	0.0296726	-0.0478361	0.855337	0.00113077	0.996563	0.0232088	0.929547	0.0850699	0.745465	-0.250228	0.332714	-0.202166	0.436482
ENSRNOG00000058006	Sncg	64347	blue	-0.383926	0.12816	0.466253	0.0592277	0.0710028	0.786549	0.0209424	0.936413	-0.206186	0.427219	0.0645335	0.80563	0.043435	0.868532	0.240157	0.35317	-0.469027	0.0575319	-0.361485	0.153966	0.466595	0.0590166	-0.374346	0.138778	0.214379	0.408662	0.0114485	0.965216	0.0964451	0.712706	0.262462	0.308814	0.257049	0.31926
ENSRNOG00000008831	Hcn2	114244	blue	-0.383887	0.128202	0.747138	0.000567389	0.500028	0.0409558	0.210263	0.417931	0.375759	0.137176	0.0165263	0.949804	-0.329914	0.195931	-0.0332343	0.899237	-0.0297858	0.90965	-0.243892	0.345503	0.367726	0.146461	-0.224416	0.386527	0.399905	0.111731	-0.259344	0.314806	-0.331027	0.194335	0.113685	0.663965	0.0543196	0.835965
ENSRNOG00000016622	LOC100910438	294679	blue	0.383085	0.129069	-0.624282	0.00739185	-0.617114	0.00831388	-0.314917	0.218262	-0.520718	0.0321031	-0.0256132	0.922268	0.484939	0.048497	0.358613	0.157505	-0.307945	0.22918	0.037809	0.885448	-0.354058	0.163233	0.0671153	0.798002	-0.281157	0.274314	0.247185	0.338821	0.320671	0.209509	-0.0253968	0.922923	0.279373	0.2775
ENSRNOG00000014761	Rasd2	171099	blue	-0.382461	0.129746	0.64546	0.00513604	0.150405	0.564485	-0.0646459	0.805298	-0.176365	0.49833	-0.00997996	0.969676	-0.139705	0.592802	0.12287	0.638494	-0.564078	0.018346	-0.528903	0.0290385	0.331082	0.194256	-0.539193	0.025511	0.41523	0.0974274	-0.230838	0.372716	-0.011915	0.9638	0.480868	0.0506992	0.187997	0.469943
ENSRNOG00000048036	Ncan	58982	blue	-0.379201	0.133324	0.724492	0.00100396	0.824653	4.65e-05	0.539757	0.0253277	0.699775	0.00176514	-0.533911	0.0272778	-0.500117	0.0409142	-0.682498	0.00253798	0.463772	0.060775	0.217432	0.401859	-0.113834	0.66355	0.21629	0.404395	0.174142	0.503845	-0.364068	0.150829	-0.534103	0.0272118	0.143068	0.58384	0.0285797	0.913296
ENSRNOG00000052343	Eif4e	117045	blue	0.379118	0.133416	-0.602288	0.0105126	-0.532468	0.0277764	-0.297153	0.246754	-0.380251	0.132165	-0.0932358	0.721903	0.26336	0.307099	0.184732	0.477828	-0.15853	0.543378	0.0832795	0.750661	-0.582181	0.014207	0.0910628	0.728151	-0.182757	0.482631	0.00126078	0.996168	0.134853	0.605833	0.00641148	0.980516	0.120536	0.644932
ENSRNOG00000011595	Senp8	315723	blue	0.378575	0.134019	-0.76886	0.00030994	-0.606659	0.00982123	-0.150702	0.563705	-0.454809	0.0666153	0.0605906	0.817312	0.628842	0.00684937	0.445067	0.0734214	-0.0676222	0.796507	0.302801	0.237453	-0.257783	0.31783	0.324373	0.204	-0.539543	0.0253973	0.474402	0.0543503	0.339772	0.1821	-0.448955	0.0706466	0.336949	0.185992
ENSRNOG00000001289	LOC498154	498154	blue	0.37854	0.134058	-0.676006	0.00289162	-0.351961	0.165915	-0.166855	0.522127	-0.0618069	0.813704	0.466837	0.0588675	0.28659	0.26475	0.227409	0.380054	0.286269	0.265309	0.262776	0.308214	0.2556	0.32209	0.209931	0.418683	-0.327689	0.199145	0.602965	0.0104031	0.532573	0.0277397	-0.620917	0.007814	-0.339607	0.182326
ENSRNOG00000014832	Mapkapk3	315994	blue	0.378495	0.134108	-0.742558	0.000639729	-0.690286	0.00216112	-0.379526	0.132964	-0.650979	0.00465063	0.376348	0.136511	0.568613	0.0172301	0.472169	0.0556558	-0.261894	0.3099	0.0293536	0.910956	0.153884	0.555405	0.00202385	0.993849	-0.410761	0.101455	0.5652	0.0180648	0.747111	0.000567793	-0.330483	0.195114	0.0148841	0.954787
ENSRNOG00000051720	Nudc	29648	blue	0.378419	0.134193	-0.710814	0.00138146	-0.699022	0.00179421	-0.4578	0.0646219	-0.535335	0.0267923	0.571998	0.0164327	0.459833	0.0632929	0.617596	0.00824912	-0.244274	0.344724	-0.0181459	0.944891	0.231848	0.370567	-0.129545	0.620218	-0.233534	0.366999	0.528845	0.0290593	0.676005	0.00289168	-0.526925	0.0297575	-0.06427	0.80641
ENSRNOG00000000900	Tpst1	288617	blue	-0.377802	0.13488	0.438059	0.0786225	0.35122	0.166871	0.481133	0.0505539	0.0641654	0.806719	-0.214729	0.407878	0.27645	0.282768	0.0358597	0.89132	0.00137518	0.995821	0.0896985	0.732082	0.466636	0.0589914	0.253499	0.326223	-0.26984	0.294905	0.340434	0.181194	0.0392824	0.881013	-0.0225683	0.931487	0.431254	0.0839256
ENSRNOG00000014152	Kcnip3	65199	blue	-0.376869	0.135925	0.68536	0.0023937	0.390665	0.121039	-0.134564	0.606615	0.457634	0.0647316	0.0921648	0.724981	-0.820835	5.4e-05	-0.207955	0.423176	-0.0884142	0.735788	-0.448484	0.0709784	-0.0102536	0.968845	-0.624235	0.00739762	0.904677	6.13e-07	-0.69951	0.00177532	-0.485357	0.048275	0.380238	0.132179	-0.483084	0.0494915
ENSRNOG00000011302	Rab11a	81830	blue	0.374404	0.138713	-0.664164	0.00363993	-0.372549	0.140836	-0.15702	0.547275	-0.160443	0.538461	-0.133915	0.608366	0.200749	0.439772	-0.0278119	0.915617	0.170559	0.512796	0.385247	0.126741	-0.476886	0.0529253	0.274251	0.286771	-0.293676	0.252591	0.172645	0.507576	0.260001	0.313537	-0.292519	0.254552	-0.0219238	0.93344
ENSRNOG00000006740	Castor1	360969	blue	0.373856	0.139337	-0.651831	0.00457919	-0.461438	0.0622577	-0.283413	0.270318	-0.264142	0.305611	0.441134	0.0763085	0.382393	0.12982	0.293825	0.252339	0.00895104	0.972801	-0.00294964	0.991036	0.197177	0.44812	0.133674	0.609017	-0.31695	0.215143	0.437656	0.0789295	0.445679	0.0729795	-0.118022	0.651892	-0.207452	0.424324
ENSRNOG00000017235	Atp6v0d1	291969	blue	0.373736	0.139474	-0.610206	0.00928733	-0.366756	0.147611	-0.26363	0.306585	-0.164676	0.527651	0.416163	0.0966009	0.232073	0.370091	0.240805	0.351833	0.134383	0.607103	0.243551	0.346199	0.172504	0.507927	0.025992	0.921122	-0.187287	0.471652	0.401857	0.109831	0.388781	0.123	-0.570541	0.0167723	-0.225986	0.383125
ENSRNOG00000054033	Adap1	171097	blue	-0.373128	0.140171	0.783786	0.00019691	0.820752	5.41e-05	0.459642	0.0634168	0.660079	0.00393187	-0.515311	0.0342595	-0.634068	0.00626733	-0.738868	0.000703435	0.383917	0.128169	0.124354	0.634413	-0.0824356	0.753113	0.0476292	0.855956	0.326393	0.201034	-0.500526	0.040723	-0.530107	0.0286076	0.225614	0.383928	-0.13279	0.611409
ENSRNOG00000031827	Arih2	316005	blue	-0.370339	0.143394	0.715029	0.00125443	0.381943	0.13031	-0.0473133	0.856902	0.339086	0.18304	0.148901	0.568429	-0.606347	0.00986939	-0.105575	0.686749	-0.134613	0.606482	-0.469765	0.0570876	0.256109	0.321094	-0.519945	0.0324048	0.670844	0.00320069	-0.446548	0.0723552	-0.224316	0.386744	0.260155	0.31324	-0.315493	0.217376
ENSRNOG00000061390	LOC365778	365778	blue	-0.369412	0.144478	0.643591	0.00530932	0.641468	0.00551197	0.566098	0.0178422	0.40148	0.110196	-0.563776	0.0184222	-0.22856	0.377582	-0.546766	0.0231343	0.246852	0.339493	0.0480224	0.854779	-0.0587392	0.82281	0.326787	0.200459	-0.0734258	0.779431	-0.269089	0.296302	-0.381818	0.130446	0.424887	0.0891166	0.196063	0.450742
ENSRNOG00000015753	Epn1	117277	blue	-0.368178	0.145927	0.631224	0.00657889	0.610201	0.00928801	0.154301	0.554321	0.658275	0.00406668	-0.067835	0.795879	-0.76769	0.000320709	-0.522392	0.0314572	0.311742	0.223193	-0.15204	0.560209	0.0193345	0.941287	-0.191219	0.462225	0.552835	0.0213564	-0.520897	0.0320334	-0.393549	0.118077	0.278855	0.278428	-0.500216	0.040868
ENSRNOG00000010497	RGD1305807	298077	blue	0.367311	0.146953	-0.693622	0.00201436	-0.552798	0.021367	-0.390779	0.120921	-0.411414	0.100859	0.491586	0.0450561	0.29063	0.257774	0.248796	0.335581	-0.0831891	0.750923	-0.0380558	0.884705	0.216803	0.403255	-0.0414942	0.874362	-0.261613	0.310438	0.381577	0.13071	0.593168	0.0120795	-0.164328	0.528536	-0.304486	0.234724
ENSRNOG00000028356	Chchd10	361824	blue	0.366481	0.147938	-0.669106	0.00331055	-0.362063	0.15326	-0.230465	0.37351	-0.00704285	0.978598	0.465075	0.0599586	0.186683	0.473108	0.188815	0.467978	0.263544	0.306749	0.149685	0.566372	0.136119	0.602422	0.194109	0.455356	-0.240178	0.353125	0.395329	0.116274	0.387324	0.124534	-0.366069	0.148429	-0.371809	0.141689
ENSRNOG00000059344	Tpcn1	246215	blue	-0.365369	0.149265	0.820617	5.44e-05	0.513814	0.0348757	0.199604	0.442439	0.261213	0.311206	0.0417465	0.873604	-0.299234	0.243302	-0.105681	0.686451	-0.124539	0.633906	-0.375302	0.137693	0.53633	0.0264574	-0.310214	0.225589	0.366538	0.14787	-0.138997	0.594697	-0.101139	0.699323	0.229295	0.376009	-0.00381115	0.988418
ENSRNOG00000001489	Tbp	117526	blue	0.364796	0.149953	-0.80644	9.21e-05	-0.762274	0.000374737	-0.50617	0.0381552	-0.577267	0.0152492	0.465866	0.059467	0.388287	0.123519	0.53077	0.028372	-0.249814	0.333542	0.0440966	0.866546	0.0202075	0.938641	-0.156595	0.548373	-0.18291	0.482257	0.409168	0.102919	0.637793	0.00587732	-0.440945	0.0764494	-0.101387	0.698618
ENSRNOG00000018046	Lgals8	116641	blue	0.364439	0.150382	-0.6209	0.00781619	-0.61896	0.00806806	-0.290982	0.257172	-0.56542	0.01801	-0.00766096	0.97672	0.585562	0.0135231	0.527252	0.0296378	-0.333475	0.190857	0.180023	0.489316	-0.361386	0.154087	0.0510152	0.845828	-0.28543	0.266776	0.234802	0.364328	0.125361	0.63165	-0.263371	0.307078	0.504252	0.0390136
ENSRNOG00000020394	Mcmbp	309009	blue	0.364076	0.150819	-0.681169	0.0026073	-0.525814	0.0301675	-0.102267	0.696118	-0.627608	0.00699288	0.0798084	0.760762	0.783344	0.000199668	0.388848	0.12293	-0.146255	0.575399	0.340091	0.181664	0.12528	0.631874	0.263202	0.3074	-0.660623	0.0038919	0.724934	0.000993354	0.66203	0.00379016	-0.491578	0.0450605	0.414189	0.0983548
ENSRNOG00000010235	Pkig	266709	blue	0.362889	0.152255	-0.63989	0.00566651	-0.544556	0.0238093	-0.492624	0.0445361	-0.344535	0.175656	0.441978	0.0756816	0.116712	0.65553	0.195791	0.451383	-0.136083	0.60252	-0.120675	0.644548	-0.0213699	0.935118	-0.198313	0.445458	-0.0272149	0.917422	0.154917	0.552719	0.3623	0.152972	-0.00485503	0.985246	-0.377253	0.135495
ENSRNOG00000058646	Zfp36l1	29344	blue	-0.362883	0.152262	0.60097	0.0107285	0.330627	0.194907	0.305316	0.233385	-0.0285552	0.91337	0.00786221	0.976109	0.189723	0.465801	0.14213	0.586334	-0.209162	0.420428	-0.232749	0.368658	0.592079	0.0122782	-0.0285846	0.913281	-0.084	0.748569	0.213255	0.411182	0.071784	0.784252	0.12419	0.634865	0.426704	0.0876123
ENSRNOG00000015751	Cyp4f18	290623	blue	0.362743	0.152433	-0.504593	0.03886	-0.262193	0.309327	0.0380458	0.884735	-0.189199	0.467056	-0.283875	0.269503	0.346822	0.172617	-0.017233	0.94766	0.145456	0.577509	0.372342	0.141074	-0.523855	0.0309006	0.404773	0.107036	-0.432087	0.0832625	0.211947	0.414124	0.0823708	0.753302	-0.227784	0.379249	0.224372	0.386621
ENSRNOG00000031134	Serpinb3	304688	blue	0.361441	0.154019	-0.608834	0.00949104	-0.387988	0.123833	-0.209655	0.419308	-0.358191	0.158031	0.203756	0.432806	0.264717	0.304521	-0.00711983	0.978364	0.0512368	0.845165	0.136849	0.600459	0.0459171	0.861086	0.123044	0.638017	-0.384507	0.127534	0.337194	0.185653	0.548624	0.0225781	-0.171467	0.510522	-0.188334	0.469132
ENSRNOG00000021628	Wdr89	314243	blue	0.360127	0.155633	-0.6416	0.0054992	-0.386303	0.125615	-0.0418973	0.87315	-0.423688	0.09012	0.166674	0.522584	0.645153	0.00516414	0.217105	0.402583	0.0398223	0.879389	0.321308	0.208554	0.224792	0.385711	0.337956	0.184598	-0.667134	0.00343896	0.650749	0.00467011	0.554375	0.0209227	-0.390796	0.120902	0.280569	0.275362
ENSRNOG00000019915	Xrcc1	84495	blue	0.358478	0.157674	-0.804005	0.000100444	-0.486627	0.0476049	-0.208834	0.421172	-0.308896	0.227671	0.16363	0.530313	0.33599	0.187327	0.0879643	0.737088	0.129451	0.620476	0.333226	0.19121	-0.0904169	0.730011	0.227815	0.379181	-0.420855	0.0925224	0.400502	0.111147	0.465961	0.0594083	-0.332415	0.192359	-0.134523	0.606723
ENSRNOG00000011475	Srcin1	56029	blue	-0.357331	0.159103	0.814507	6.87e-05	0.663498	0.00368625	0.201636	0.437711	0.459036	0.0638114	-0.210244	0.417973	-0.615409	0.00854622	-0.520233	0.0322921	0.0742791	0.776929	-0.250223	0.332726	0.071033	0.78646	-0.265492	0.303055	0.493616	0.044043	-0.580823	0.0144891	-0.522613	0.0313724	0.502276	0.0399133	-0.156163	0.54949
ENSRNOG00000009888	Timm8b	64372	blue	0.356148	0.160587	-0.669123	0.00330946	-0.603583	0.0103038	-0.413687	0.098805	-0.267689	0.298919	0.342542	0.178333	0.335568	0.187916	0.518526	0.0329646	-0.148193	0.570291	-0.0283589	0.913963	-0.214474	0.408449	0.00317742	0.990344	-0.0795834	0.761418	0.229429	0.375722	0.18339	0.48109	-0.154592	0.553565	-0.0323735	0.901835
ENSRNOG00000020829	Them4	361992	blue	0.355041	0.161985	-0.538505	0.025736	-0.636319	0.00602924	-0.510036	0.0364684	-0.429867	0.0850368	0.161673	0.535311	0.171784	0.509726	0.451655	0.0687655	-0.369415	0.144473	-0.0757282	0.772683	-0.475994	0.0534337	-0.275217	0.285008	0.123273	0.637386	-0.0951832	0.716318	0.03128	0.905136	-0.126834	0.627618	0.125254	0.631944
ENSRNOG00000006541	Nup107	116555	blue	0.354201	0.163051	-0.701883	0.0016858	-0.366242	0.148223	-0.159351	0.541265	-0.0450184	0.863781	0.0283411	0.914017	0.184777	0.477718	0.0665929	0.799544	0.258501	0.316437	0.446252	0.0725673	-0.315815	0.216881	0.247841	0.337499	-0.245157	0.342927	0.298607	0.244339	0.263482	0.306866	-0.514598	0.0345522	-0.105116	0.688046
ENSRNOG00000018591	Rabepk	296649	blue	0.353971	0.163343	-0.704554	0.00158951	-0.586165	0.0134038	-0.563201	0.0185681	-0.198703	0.444545	0.576185	0.0154866	-0.0174848	0.946896	0.335259	0.188348	-0.0243207	0.92618	-0.0283541	0.913978	-0.0624425	0.81182	-0.249404	0.334363	0.136275	0.602002	0.122412	0.639756	0.356615	0.160001	-0.355616	0.161258	-0.53701	0.0262301
ENSRNOG00000022635	Dlg2	64053	blue	-0.35379	0.163573	0.828353	4.01e-05	0.757945	0.000423195	0.401028	0.110635	0.621804	0.00770083	-0.358714	0.15738	-0.585583	0.0135189	-0.583939	0.0138481	0.260574	0.312433	-0.109905	0.674553	-0.0133796	0.959353	-0.0274536	0.9167	0.367379	0.146871	-0.480809	0.0507316	-0.564443	0.0182541	0.37134	0.142231	-0.113343	0.664921
ENSRNOG00000024411	Cbr4	359725	blue	0.353457	0.163999	-0.653281	0.00445952	-0.391704	0.119965	-0.188685	0.468289	-0.146401	0.575014	0.496205	0.0427763	0.334294	0.189703	0.34276	0.178039	0.194156	0.455246	0.265654	0.302748	0.32254	0.206716	0.149978	0.565602	-0.314159	0.219433	0.58356	0.0139248	0.556605	0.0203071	-0.700433	0.00174007	-0.192754	0.458571
ENSRNOG00000046773	Olr670	404826	blue	-0.352425	0.16532	0.737583	0.000726801	0.399831	0.111803	0.188621	0.468442	0.160352	0.538694	0.00964106	0.970705	-0.194193	0.455158	0.0109983	0.966583	-0.210996	0.41627	-0.395646	0.115956	0.378896	0.133662	-0.242345	0.348666	0.277553	0.280772	-0.24858	0.336014	-0.314183	0.219396	0.316635	0.215625	0.167172	0.521324
ENSRNOG00000011498	Psip1	313323	blue	0.352217	0.165586	-0.634922	0.00617616	-0.657957	0.00409081	-0.389329	0.122428	-0.526157	0.0300405	0.0711202	0.786204	0.455833	0.0659275	0.546345	0.0232617	-0.344133	0.176194	0.131332	0.61536	-0.381363	0.130943	-0.0798106	0.760756	-0.11855	0.650428	0.177501	0.495522	0.170807	0.512174	-0.289269	0.260112	0.348434	0.170495
ENSRNOG00000016896	Rpl3	300079	blue	0.351343	0.166712	-0.643913	0.00527913	-0.505745	0.0383442	-0.221176	0.393599	-0.434021	0.0817386	-0.0270815	0.917826	0.438079	0.0786076	0.208136	0.422763	-0.150968	0.56301	0.107458	0.681436	-0.427698	0.0867971	0.210975	0.416319	-0.368867	0.145117	0.0405056	0.877334	-0.0624615	0.811764	0.162308	0.533688	0.250107	0.332957
ENSRNOG00000001548	Nfe2l2	83619	blue	0.350361	0.167983	-0.563589	0.0184695	-0.330771	0.194702	0.0645648	0.805538	-0.475964	0.053451	-0.17975	0.489986	0.723824	0.00102017	0.12065	0.644617	0.00199868	0.993926	0.44135	0.0761475	-0.00287616	0.991259	0.430855	0.084244	-0.739412	0.00069372	0.694242	0.00198803	0.597365	0.0113369	-0.402903	0.108822	0.456227	0.0656646
ENSRNOG00000002101	Paics	140946	blue	0.350163	0.16824	-0.593772	0.0119703	-0.780633	0.000217326	-0.571106	0.0166398	-0.754162	0.000469714	0.467429	0.058504	0.482659	0.0497215	0.702268	0.00167165	-0.555283	0.0206704	-0.18866	0.46835	0.157953	0.544867	-0.350673	0.167579	-0.0887501	0.734818	0.41051	0.101684	0.718173	0.00116607	-0.324477	0.203845	0.0754406	0.773525
ENSRNOG00000009323	Fam214b	298201	blue	-0.34821	0.170789	0.789936	0.000161676	0.66543	0.00355313	0.373022	0.140293	0.453702	0.0673641	-0.160723	0.537743	-0.285875	0.265997	-0.284278	0.268794	0.12778	0.625031	-0.146323	0.575218	0.276243	0.283143	-0.00623467	0.981053	0.196895	0.448783	-0.232874	0.368394	-0.421477	0.0919903	0.236209	0.361377	0.145467	0.577481
ENSRNOG00000013874	Rplp1	140661	blue	0.347763	0.171377	-0.735332	0.000769324	-0.333712	0.190523	0.0657532	0.802025	-0.233263	0.367573	-0.199969	0.441588	0.53591	0.0265985	-0.000578852	0.998241	0.243031	0.34726	0.542781	0.0243624	-0.290453	0.258077	0.584885	0.0136578	-0.67718	0.00282485	0.454262	0.0669845	0.263606	0.306632	-0.291314	0.256605	0.207838	0.423442
ENSRNOG00000019798	Stub1	287155	blue	0.347353	0.171915	-0.667759	0.00339781	-0.570978	0.0166699	-0.410629	0.101576	-0.276469	0.282734	0.466204	0.0592575	0.350916	0.167264	0.570146	0.0168654	-0.102311	0.695992	0.140176	0.591546	0.111807	0.669217	-0.107765	0.68057	-0.0584265	0.823739	0.460798	0.0626685	0.438583	0.0782246	-0.586812	0.0132769	-0.0743674	0.77667
ENSRNOG00000009636	Scrn1	502776	blue	-0.346764	0.172693	0.662303	0.00377067	0.519995	0.0323854	0.270345	0.293966	0.253132	0.326947	-0.0608127	0.816653	-0.202596	0.435486	-0.187067	0.472182	0.0355845	0.892149	-0.0308847	0.90633	0.608869	0.00948581	-0.166555	0.522885	0.191289	0.462058	0.0978613	0.708659	0.153514	0.556367	-0.133233	0.610211	-6.36e-05	0.999807
ENSRNOG00000018057	Mrpl2	301240	blue	0.346553	0.172972	-0.696659	0.00188796	-0.631021	0.00660159	-0.556072	0.0204531	-0.237916	0.357815	0.520922	0.0320238	0.0779323	0.766237	0.498415	0.0417165	-0.111262	0.670745	0.0173767	0.947224	-0.133658	0.60906	-0.265008	0.30397	0.173181	0.506237	0.118567	0.650383	0.247227	0.338736	-0.428052	0.0865077	-0.323527	0.205251
ENSRNOG00000007369	Shisa4	360848	blue	0.345758	0.174026	-0.626007	0.00718275	-0.571992	0.016434	-0.383365	0.128765	-0.483603	0.0492118	0.00537022	0.98368	0.323434	0.205388	0.254195	0.324851	-0.270094	0.294433	0.0670541	0.798183	-0.509566	0.0366705	-0.0293423	0.91099	-0.161354	0.536126	-0.0392411	0.881137	0.0127289	0.961329	0.0804533	0.758883	0.264542	0.304852
ENSRNOG00000013216	Usb1	307643	blue	0.345554	0.174297	-0.628883	0.00684467	-0.261083	0.311454	0.0637511	0.807945	-0.101847	0.697309	0.268445	0.297505	0.506744	0.0379012	0.217045	0.402718	0.34266	0.178174	0.443851	0.0743049	0.242563	0.34822	0.471131	0.0562706	-0.620302	0.00789306	0.714657	0.00126522	0.484785	0.0485789	-0.717826	0.00117557	0.0517086	0.843756
ENSRNOG00000010024	Cyb5r4	171015	blue	0.345334	0.17459	-0.774381	0.000263087	-0.500449	0.0407588	-0.25249	0.328217	-0.177992	0.49431	0.353922	0.163406	0.257099	0.319163	0.308236	0.228718	0.173467	0.505525	0.327591	0.199287	-0.0451968	0.863246	0.139676	0.592882	-0.249434	0.334301	0.397066	0.114535	0.399995	0.111642	-0.63462	0.00620827	-0.182861	0.482376
ENSRNOG00000002948	Abcc3	140668	blue	-0.344051	0.176303	0.768313	0.000314936	0.566926	0.0176388	0.356869	0.159683	0.24	0.353494	-0.178341	0.493451	-0.150521	0.56418	-0.175859	0.499582	-0.0406966	0.876759	-0.144265	0.580664	0.333393	0.190973	-0.0793441	0.762116	0.135901	0.603009	-0.190416	0.464142	-0.390355	0.121359	0.196279	0.450233	0.313158	0.220985
ENSRNOG00000021006	Tmem147	292792	blue	0.343133	0.177536	-0.808948	8.42e-05	-0.509531	0.0366854	-0.0897843	0.731835	-0.371855	0.141636	0.185681	0.47553	0.6244	0.00737742	0.33385	0.190329	0.124726	0.633392	0.454593	0.0667605	0.131572	0.614709	0.379209	0.133315	-0.626985	0.00706624	0.775563	0.000253868	0.742252	0.000644821	-0.69073	0.00214109	0.104341	0.690238
ENSRNOG00000059474	Mob1a	297387	blue	-0.34119	0.180165	0.491332	0.0451842	0.520776	0.0320807	0.39647	0.115129	0.270477	0.293722	-0.500434	0.0407658	-0.24373	0.345832	-0.494186	0.0437616	0.201964	0.43695	0.268013	0.298313	0.0908148	0.728865	0.114262	0.662356	0.0184072	0.944099	-0.104189	0.69067	-0.0384019	0.883663	-0.0285552	0.91337	0.0600141	0.819023
ENSRNOG00000050044	Ptp4a2	85237	blue	0.339429	0.18257	-0.462879	0.0613387	-0.132457	0.612311	0.190431	0.464106	-0.171233	0.511106	0.161443	0.5359	0.555156	0.0207055	0.0864888	0.741355	0.31096	0.224417	0.398814	0.112802	0.357863	0.158439	0.519115	0.0327313	-0.736791	0.000741547	0.719012	0.00114339	0.536769	0.0263106	-0.592859	0.0121357	0.166624	0.522712
ENSRNOG00000021185	Bola1	365875	blue	0.339372	0.182648	-0.733525	0.000804919	-0.577114	0.0152826	-0.433494	0.0821519	-0.183918	0.479805	0.673124	0.003061	0.133831	0.608593	0.432328	0.0830715	0.0478322	0.855348	-0.0185472	0.943674	0.128192	0.623907	-0.0777271	0.766837	-0.0447162	0.864687	0.284654	0.268134	0.386419	0.125492	-0.393485	0.118142	-0.463548	0.0609156
ENSRNOG00000009994	Dlat	81654	blue	-0.339197	0.182888	0.672984	0.00306945	0.566742	0.0176838	0.196755	0.449112	0.561385	0.0190347	0.0949607	0.716955	-0.586254	0.0133863	-0.26577	0.302529	0.233039	0.368046	-0.158649	0.543072	0.382149	0.130085	-0.223662	0.388166	0.477264	0.0527113	-0.241258	0.350899	-0.144613	0.579741	-0.0577147	0.825855	-0.394047	0.11757
ENSRNOG00000037909	Ppm1f	287931	blue	-0.338901	0.183294	0.754595	0.00046419	0.395866	0.115734	-0.0878536	0.737408	0.309501	0.226714	0.184777	0.47772	-0.633872	0.00628845	-0.151945	0.560458	-0.19592	0.451078	-0.602015	0.010557	0.263059	0.307673	-0.5795	0.0147683	0.714739	0.00126283	-0.559873	0.0194304	-0.346051	0.173637	0.507038	0.0377713	-0.357037	0.159471
ENSRNOG00000050794	Pdlim4	24915	blue	0.338424	0.183951	-0.74056	0.000673597	-0.707287	0.00149574	-0.536583	0.0263726	-0.510438	0.0362965	0.485459	0.0482207	0.308642	0.228074	0.468127	0.0580782	-0.252243	0.328706	-0.00616378	0.981269	0.143371	0.583036	-0.236252	0.361288	-0.0798166	0.760738	0.440829	0.0765355	0.742125	0.000646941	-0.383796	0.1283	-0.245542	0.342144
ENSRNOG00000047984	Mrps22	683519	blue	0.338268	0.184167	-0.709739	0.00141551	-0.323852	0.204769	0.126481	0.628583	-0.198615	0.444751	0.00559106	0.983009	0.622325	0.00763502	0.197971	0.446258	0.300591	0.241067	0.569836	0.0169387	-0.030276	0.908169	0.616038	0.00845987	-0.744554	0.000607302	0.650708	0.00467361	0.393212	0.11842	-0.632756	0.00640959	0.286403	0.265077
ENSRNOG00000008378	Zfp414	299647	blue	0.338222	0.184231	-0.687699	0.00228083	-0.414182	0.0983612	-0.213321	0.411032	-0.211296	0.415593	0.282628	0.271704	0.338104	0.184393	0.248339	0.336498	0.124906	0.632899	0.341289	0.180031	0.064469	0.805821	0.127213	0.626581	-0.282218	0.272431	0.4701	0.0568862	0.427321	0.0871059	-0.537827	0.0259593	-0.0592624	0.821255
ENSRNOG00000008360	LOC103692167	312480	blue	0.337213	0.185626	-0.786555	0.000180323	-0.39306	0.118575	0.0171581	0.947887	-0.270755	0.293205	0.0205501	0.937602	0.551753	0.0216654	0.148656	0.569072	0.250841	0.331492	0.575722	0.0155889	-0.0679018	0.795682	0.481665	0.0502626	-0.646477	0.00504366	0.61168	0.0090724	0.450904	0.0692848	-0.591525	0.0123805	0.147573	0.571922
ENSRNOG00000005360	Dhrs7b	287380	blue	0.33699	0.185935	-0.768925	0.000309349	-0.408	0.104002	-0.139708	0.592796	-0.0515997	0.844081	0.250069	0.333033	0.196184	0.450455	0.14437	0.580384	0.332309	0.192509	0.402206	0.109494	-0.107623	0.680971	0.296165	0.248404	-0.326889	0.200309	0.378264	0.134365	0.370164	0.143598	-0.605637	0.0099795	-0.258433	0.316569
ENSRNOG00000005614	Txn2	79462	blue	0.333605	0.190674	-0.781613	0.000210798	-0.694757	0.00196637	-0.546202	0.0233049	-0.296473	0.247889	0.575447	0.0156501	0.165045	0.526715	0.526743	0.0298242	-0.0979808	0.708318	0.0236573	0.928189	-0.0426045	0.871026	-0.202044	0.436764	0.0456582	0.861862	0.298054	0.245255	0.458777	0.0639805	-0.488095	0.0468395	-0.355743	0.161097
ENSRNOG00000033473	Rpl36	58927	blue	0.333286	0.191124	-0.806344	9.25e-05	-0.435746	0.0803969	-0.107648	0.680899	-0.129414	0.620577	-0.0582873	0.824153	0.308647	0.228065	0.111625	0.669726	0.257629	0.318131	0.507806	0.0374345	-0.480162	0.0510886	0.402907	0.108818	-0.390312	0.121404	0.264329	0.305257	0.139214	0.594118	-0.430512	0.0845188	-0.00117708	0.996423
ENSRNOG00000019336	Gata3	85471	blue	0.332046	0.192882	-0.587085	0.0132236	-0.596192	0.0115407	-0.36303	0.152084	-0.449092	0.0705502	0.593441	0.0120301	0.392628	0.119017	0.527206	0.0296546	-0.217895	0.400832	-0.209557	0.419531	0.179744	0.489999	-0.0737975	0.778341	-0.229017	0.376603	0.351937	0.165946	0.382646	0.129545	-0.139701	0.592815	-0.0555222	0.832381
ENSRNOG00000006946	Arhgap9	362893	blue	0.330881	0.194545	-0.600601	0.0107896	-0.359543	0.156354	0.0873553	0.738848	-0.466556	0.0590403	-0.167371	0.520821	0.728743	0.000905754	0.142593	0.585103	-0.000574787	0.998253	0.417556	0.0953771	-0.018133	0.94493	0.495996	0.0428774	-0.778441	0.000232546	0.558005	0.0199277	0.42015	0.0931269	-0.265033	0.303923	0.529415	0.0288546
ENSRNOG00000007404	Svbp	362578	blue	0.330655	0.194868	-0.69299	0.00204154	-0.428494	0.0861478	-0.257917	0.317571	-0.0138914	0.9578	0.479523	0.0514432	0.124776	0.633255	0.298723	0.244145	0.236314	0.361159	0.169793	0.51472	-0.0229536	0.93032	0.135544	0.603972	-0.141438	0.588177	0.246181	0.340851	0.197162	0.448156	-0.460164	0.0630782	-0.341699	0.179475
ENSRNOG00000022929	Mtmr12	310155	blue	-0.330576	0.194981	0.564197	0.0183159	0.716897	0.00120128	0.692893	0.00204573	0.4804	0.0509571	-0.418319	0.0947108	-0.144822	0.579188	-0.540146	0.0252019	0.49278	0.0444584	0.357255	0.159199	0.321763	0.207874	0.41959	0.0936089	-0.251815	0.329556	0.151117	0.56262	-0.0649606	0.804367	-0.233858	0.366317	0.0995018	0.703981
ENSRNOG00000003203	Hexim1	498008	blue	0.327532	0.199373	-0.776961	0.000243313	-0.682548	0.00253537	-0.258422	0.316591	-0.590591	0.0125542	0.378954	0.133598	0.616978	0.00833225	0.520853	0.0320508	-0.15058	0.564025	0.118153	0.651528	0.163945	0.52951	0.159988	0.539629	-0.531216	0.0282149	0.646794	0.00501514	0.755655	0.000450871	-0.477582	0.0525313	0.0742299	0.777073
ENSRNOG00000019425	Gabarapl2	64670	blue	0.327285	0.199733	-0.668358	0.00335881	-0.789027	0.000166525	-0.600721	0.0107696	-0.622463	0.00761768	0.431288	0.0838983	0.345435	0.174455	0.613296	0.00884118	-0.488761	0.0464952	-0.251358	0.330463	-0.150384	0.56454	-0.271406	0.292001	-0.0119534	0.963683	0.042816	0.870391	0.243337	0.346635	0.0722927	0.782758	0.0201659	0.938767
ENSRNOG00000023605	Ncbp1	298075	blue	0.32645	0.20095	-0.544019	0.0239757	-0.34477	0.175342	-0.221907	0.391997	-0.0968537	0.711538	0.0784373	0.764763	0.10908	0.676871	0.109941	0.674451	0.103585	0.692379	0.281847	0.273087	-0.262618	0.308514	0.0436332	0.867937	-0.0826719	0.752426	0.175412	0.500691	0.202795	0.435026	-0.414768	0.0978382	-0.0552693	0.833134
ENSRNOG00000014230	Map1a	25152	blue	-0.322279	0.207104	0.735101	0.000773801	0.656321	0.00421686	0.357529	0.158856	0.57967	0.0147321	-0.0252071	0.923497	-0.381991	0.130258	-0.286411	0.265062	0.238367	0.356877	-0.16812	0.518932	0.382237	0.129989	-0.0130358	0.960397	0.264275	0.30536	-0.167362	0.520845	-0.334328	0.189656	0.156878	0.547642	-0.105	0.688376
ENSRNOG00000019746	Paf1	361531	blue	0.322233	0.207173	-0.652433	0.00452919	-0.681497	0.00259006	-0.364926	0.149797	-0.602426	0.0104902	0.305175	0.233612	0.497168	0.042312	0.532397	0.0278012	-0.300813	0.240701	0.0278912	0.915377	0.0416441	0.873911	-0.0802968	0.759339	-0.273919	0.287378	0.543058	0.0242756	0.712416	0.00133198	-0.445117	0.0733853	0.0501569	0.848393
ENSRNOG00000002757	Tada2a	360581	blue	0.319036	0.211972	-0.723678	0.00102374	-0.738932	0.000702288	-0.387779	0.124053	-0.611116	0.00915418	0.432495	0.0829391	0.549344	0.0223656	0.663955	0.00365442	-0.285672	0.266351	0.0704573	0.788154	0.16712	0.521456	-0.072787	0.781306	-0.298514	0.244491	0.6164	0.00841055	0.781201	0.000213523	-0.607275	0.00972674	0.0734561	0.779342
ENSRNOG00000056956	Thap1	306547	blue	0.316349	0.216063	-0.698523	0.0018137	-0.51899	0.0327808	-0.172671	0.507512	-0.427827	0.0866919	0.440136	0.0770537	0.506646	0.0379443	0.395657	0.115945	0.01312	0.960141	0.19071	0.463439	0.309956	0.225996	0.178554	0.492924	-0.50239	0.0398609	0.604547	0.0101506	0.641732	0.00548641	-0.54161	0.0247329	-0.0033556	0.989802
ENSRNOG00000001238	Rsrc2	360807	blue	0.316343	0.216073	-0.807009	9.03e-05	-0.532406	0.0277981	-0.24914	0.334891	-0.206167	0.427262	0.0829244	0.751692	0.236451	0.360871	0.232952	0.368229	0.135497	0.604099	0.425542	0.088572	-0.392216	0.119439	0.177635	0.495191	-0.223475	0.388573	0.258316	0.316796	0.276624	0.282454	-0.543565	0.024117	-0.0773695	0.767882
ENSRNOG00000010550	Trappc3	362599	blue	0.315492	0.217377	-0.816831	6.29e-05	-0.566768	0.0176776	-0.204906	0.430158	-0.382537	0.129663	0.171545	0.510325	0.507413	0.0376063	0.337734	0.184905	0.0282043	0.91443	0.360954	0.154617	-0.105765	0.686213	0.257814	0.31777	-0.465232	0.0598607	0.480445	0.0509323	0.451786	0.0686754	-0.457209	0.0650122	0.143856	0.581748
ENSRNOG00000015821	Cd2	497761	blue	0.315452	0.217439	-0.595401	0.0116797	-0.586483	0.0133412	-0.334936	0.188801	-0.533925	0.027273	0.252703	0.327796	0.410364	0.101818	0.382034	0.130211	-0.278026	0.279921	-0.115612	0.658593	-0.160126	0.539274	0.0294296	0.910727	-0.271113	0.292544	0.087492	0.738453	0.182998	0.482043	0.143854	0.581753	0.127219	0.626565
ENSRNOG00000051480	Fxr1	361927	blue	0.314443	0.218995	-0.552376	0.0214871	-0.673142	0.00305994	-0.490041	0.0458393	-0.548645	0.022572	0.298968	0.243741	0.362638	0.15256	0.55664	0.0202976	-0.413257	0.0991911	-0.146247	0.57542	-0.163472	0.530716	-0.199704	0.442207	-0.0699388	0.78968	0.194936	0.4534	0.425424	0.0886703	-0.156803	0.547835	0.166027	0.524224
ENSRNOG00000018839	Ntrk2	25054	blue	-0.314432	0.219012	0.648755	0.00484156	0.544273	0.0238968	0.27399	0.287248	0.529391	0.0288632	-0.27368	0.287816	-0.39892	0.112698	-0.225761	0.383611	0.127626	0.625452	-0.0323009	0.902054	-0.0608089	0.816664	-0.0840069	0.748549	0.41951	0.0936785	-0.381365	0.130942	-0.621245	0.00777195	0.164176	0.528922	0.0679702	0.79548
ENSRNOG00000015231	Mrpl44	301552	blue	0.3142	0.21937	-0.606243	0.00988542	-0.557756	0.0199949	-0.597785	0.0112646	-0.139406	0.593604	0.372087	0.141368	-0.131781	0.614142	0.323526	0.205251	-0.110999	0.67148	-0.0668867	0.798677	-0.446015	0.0727376	-0.31632	0.216107	0.346793	0.172654	-0.210501	0.417391	-0.0358672	0.891297	-0.121916	0.641124	-0.41762	0.0953206
ENSRNOG00000004307	Tor3a	304884	blue	0.311392	0.22374	-0.771029	0.000290767	-0.386244	0.125678	-0.0810826	0.75705	-0.0348671	0.894312	0.0521461	0.84245	0.171087	0.511472	0.0245713	0.925422	0.341779	0.179366	0.416471	0.0963292	-0.38293	0.129236	0.386086	0.125846	-0.34555	0.174302	0.210152	0.418182	0.128942	0.621863	-0.354469	0.16271	-0.197569	0.447201
ENSRNOG00000010941	Tifa	310877	blue	0.310272	0.225499	-0.445281	0.0732665	0.0427463	0.8706	0.179916	0.489579	0.279458	0.277348	-0.20412	0.431968	0.0377872	0.885513	-0.356523	0.160117	0.615486	0.00853558	0.538738	0.0256596	-0.34746	0.171775	0.578216	0.0150433	-0.398574	0.113039	0.198777	0.444371	0.058634	0.823122	-0.370874	0.142772	-0.216086	0.404849
ENSRNOG00000005565	Traf3ip3	360900	blue	0.309636	0.226501	-0.595239	0.0117083	-0.280688	0.275149	0.0278935	0.91537	-0.0959616	0.714089	0.118654	0.650139	0.291853	0.255685	0.09437	0.718648	0.30876	0.227887	0.440317	0.0769183	0.0266793	0.919042	0.355978	0.160802	-0.448865	0.0707101	0.482893	0.0495949	0.439407	0.0776016	-0.671677	0.00314906	-0.0624948	0.811665
ENSRNOG00000003545	Uchl5	360853	blue	0.308991	0.22752	-0.623471	0.00749188	-0.510632	0.0362135	-0.550453	0.0220409	-0.0709475	0.786712	0.347422	0.171825	-0.153432	0.556579	0.254651	0.323952	-0.0135482	0.958841	0.0509598	0.845993	-0.387341	0.124516	-0.291916	0.255578	0.332716	0.191932	-0.0929657	0.722679	0.0703676	0.788418	-0.276553	0.282581	-0.468309	0.0579676
ENSRNOG00000015156	Gal	29141	blue	0.308717	0.227954	-0.609858	0.00933859	-0.438716	0.0781237	-0.00476904	0.985507	-0.404801	0.107009	-0.0117946	0.964165	0.637732	0.00588354	0.312934	0.221333	-0.0318365	0.903456	0.290646	0.257747	-0.142967	0.584109	0.406045	0.105832	-0.630565	0.00665291	0.427629	0.0868536	0.208	0.423073	-0.291987	0.255456	0.451017	0.0692064
ENSRNOG00000010180	Gid8	296466	blue	0.307706	0.229561	-0.698981	0.00179578	-0.5993	0.011007	-0.323095	0.205891	-0.513235	0.0351163	0.304469	0.234751	0.372828	0.140515	0.323111	0.205867	-0.125185	0.632134	0.125906	0.630158	0.0247956	0.924743	0.00421772	0.987182	-0.329426	0.196633	0.425801	0.0883574	0.653635	0.00443067	-0.410948	0.101284	-0.0590938	0.821756
ENSRNOG00000025791	Dync1li2	81655	blue	-0.306493	0.231497	0.618991	0.00806401	0.29233	0.254873	0.143636	0.582332	0.0202008	0.938661	-0.426415	0.0878506	-0.0866875	0.74078	-0.00600448	0.981753	-0.329339	0.196759	-0.143774	0.581964	-0.190528	0.463875	-0.20875	0.421365	0.279661	0.276984	-0.369049	0.144903	-0.453898	0.0672307	0.305539	0.233026	0.564334	0.0182815
ENSRNOG00000061883	Aqp9	65054	blue	0.304254	0.235098	-0.39495	0.116657	-0.467333	0.058563	-0.17294	0.506839	-0.518653	0.0329139	-0.00344469	0.989531	0.517837	0.0332387	0.396967	0.114633	-0.355963	0.160821	-0.0333387	0.898922	-0.261033	0.31155	0.0514497	0.844529	-0.307841	0.229346	0.128995	0.621716	-0.0557669	0.831652	0.0349439	0.89408	0.489128	0.0463063
ENSRNOG00000046000	Clasrp	499390	blue	-0.302392	0.23812	0.662422	0.00376221	0.360175	0.155573	-0.0416478	0.8739	0.258025	0.317362	-0.0572448	0.827253	-0.511366	0.0359017	-0.169193	0.516228	-0.198992	0.443869	-0.363348	0.151699	0.04079	0.876479	-0.506521	0.0379998	0.630138	0.00670116	-0.479634	0.0513815	-0.397279	0.114323	0.352186	0.165627	-0.10878	0.677714
ENSRNOG00000001312	Pdgfa	25266	blue	0.3019	0.238922	-0.79987	0.000115965	-0.605403	0.0100162	-0.221272	0.393389	-0.346438	0.173124	0.173188	0.506222	0.47414	0.0545023	0.44229	0.075451	0.00861652	0.973817	0.300825	0.240683	-0.216923	0.402987	0.261979	0.309737	-0.388991	0.12278	0.4116	0.10069	0.382157	0.130077	-0.470147	0.056858	0.0859673	0.742865
ENSRNOG00000060914	Nudcd2	287199	blue	0.301539	0.239512	-0.73572	0.000761852	-0.354651	0.162479	0.0660975	0.801007	-0.204698	0.430636	-0.0110548	0.966412	0.512607	0.0353787	0.173179	0.506244	0.294005	0.252035	0.63453	0.00621788	-0.0848383	0.746137	0.49023	0.0457425	-0.61289	0.0088988	0.621214	0.00777594	0.440186	0.0770165	-0.753644	0.000476405	0.158583	0.543243
ENSRNOG00000004143	Adipor1	289036	blue	0.301526	0.239533	-0.708574	0.00145317	-0.66662	0.00347306	-0.242849	0.347634	-0.614423	0.00868284	0.323571	0.205185	0.661856	0.00380263	0.585126	0.0136097	-0.217094	0.402607	0.157326	0.546483	0.237583	0.358509	0.110016	0.674241	-0.492904	0.0443967	0.718742	0.00115065	0.83973	2.48e-05	-0.586087	0.0134192	0.178508	0.493038
ENSRNOG00000004741	Rpl19	81767	blue	0.300161	0.241772	-0.678744	0.00273787	-0.509472	0.0367111	-0.241453	0.350498	-0.282742	0.271502	0.0351802	0.893368	0.355405	0.161524	0.288607	0.261252	-0.0138774	0.957842	0.233676	0.3667	-0.367457	0.146779	0.211516	0.415097	-0.276617	0.282466	0.246884	0.33943	0.270273	0.294099	-0.255174	0.322927	0.0565304	0.829379
ENSRNOG00000006527	Slc6a1	79212	blue	-0.297293	0.24652	0.804903	9.73e-05	0.529539	0.0288101	0.0548719	0.834318	0.409288	0.102808	-0.0198561	0.939706	-0.548526	0.0226072	-0.219373	0.397566	-0.0903248	0.730277	-0.420209	0.0930759	0.130028	0.618904	-0.408937	0.103132	0.629369	0.00678874	-0.557643	0.0200253	-0.533627	0.0273751	0.462579	0.0615292	-0.117711	0.652756
ENSRNOG00000038085	Rpe	501157	blue	0.295761	0.24908	-0.781343	0.000212583	-0.574235	0.0159218	-0.176125	0.498923	-0.324262	0.204164	0.301502	0.239573	0.407868	0.104125	0.381139	0.131189	0.091223	0.72769	0.27959	0.277112	0.0147529	0.955185	0.235391	0.363092	-0.421807	0.09171	0.55682	0.0202483	0.610124	0.00929935	-0.628321	0.00690968	-0.127657	0.625367
ENSRNOG00000016150	Ifrd2	300994	blue	0.294976	0.250399	-0.745771	0.000588221	-0.705289	0.00156385	-0.377567	0.135143	-0.581821	0.0142812	0.302963	0.237191	0.563415	0.0185138	0.512574	0.0353925	-0.303742	0.235927	0.00751273	0.97717	0.0119089	0.963818	0.0224834	0.931744	-0.339585	0.182355	0.438267	0.0784647	0.494845	0.0434381	-0.11108	0.671253	0.137324	0.599184
ENSRNOG00000024780	MGC95210	287798	blue	0.294428	0.25132	-0.612392	0.00896994	-0.306752	0.231083	0.00334981	0.98982	-0.194876	0.453541	-0.135557	0.603935	0.453892	0.0672353	0.148722	0.5689	0.181417	0.4859	0.606313	0.00987464	-0.209707	0.41919	0.351886	0.166013	-0.453894	0.0672339	0.504574	0.0388683	0.347023	0.172351	-0.679322	0.00270626	0.297911	0.245493
ENSRNOG00000014564	Yipf5	361315	blue	0.293207	0.253385	-0.682495	0.00253813	-0.530912	0.0283218	-0.19969	0.442239	-0.523112	0.0311823	0.178958	0.491932	0.453118	0.0677617	0.262263	0.309194	-0.0799975	0.760211	0.249079	0.335014	0.00527346	0.983974	0.119257	0.648471	-0.445755	0.0729248	0.428148	0.08643	0.532696	0.027697	-0.407328	0.104629	0.0851295	0.745292
ENSRNOG00000001353	Ap4m1	304344	blue	-0.292963	0.253799	0.662678	0.00374403	0.612964	0.00888836	0.208008	0.423055	0.499582	0.0411652	-0.276618	0.282464	-0.592693	0.0121659	-0.522778	0.0313094	0.177994	0.494306	-0.0302608	0.908215	-0.0158873	0.951742	-0.195927	0.451063	0.456368	0.0655707	-0.500848	0.040573	-0.462654	0.0614815	0.250245	0.332682	-0.113045	0.665754
ENSRNOG00000014963	Adgrg1	260326	blue	-0.292203	0.255089	0.577878	0.0151164	0.658664	0.0040373	0.367644	0.146558	0.647135	0.00498455	-0.409393	0.102711	-0.509246	0.0368083	-0.564138	0.0183308	0.3693	0.144609	0.136041	0.602632	-0.0357124	0.891764	0.0905292	0.729688	0.310114	0.225747	-0.354359	0.16285	-0.442077	0.0756088	0.19555	0.451951	-0.204948	0.43006
ENSRNOG00000048989	Larp7	686883	blue	0.292171	0.255143	-0.77658	0.00024615	-0.454557	0.0667852	-0.167679	0.520045	-0.0705897	0.787764	0.1648	0.527338	0.134425	0.60699	0.149447	0.566997	0.280266	0.275902	0.369819	0.144001	-0.353234	0.164284	0.269488	0.295558	-0.250789	0.331596	0.198992	0.443868	0.173898	0.504451	-0.4797	0.0513447	-0.251766	0.329652
ENSRNOG00000011024	Zdhhc20	305923	blue	0.291572	0.256165	-0.626198	0.00715991	-0.393337	0.118293	0.0245319	0.925541	-0.450066	0.069868	-0.153795	0.555636	0.743174	0.000629569	0.257095	0.31917	-0.0127137	0.961375	0.487146	0.0473331	-0.085269	0.744888	0.433155	0.0824185	-0.682735	0.00252578	0.647662	0.00493772	0.485093	0.0484152	-0.441218	0.0762461	0.529589	0.0287923
ENSRNOG00000009764	Olr488	295754	blue	-0.290931	0.257258	0.594942	0.011761	0.441073	0.0763535	0.380536	0.131851	0.227325	0.380236	-0.184513	0.478359	0.0689082	0.792715	-0.00398226	0.987898	0.00784314	0.976167	-0.0387018	0.88276	0.376019	0.136882	0.105258	0.687644	-0.0298906	0.909333	0.181757	0.485071	-0.00235414	0.992845	-0.0424046	0.871626	0.36652	0.147891
ENSRNOG00000021224	Mrps26	362216	blue	0.287635	0.262935	-0.641156	0.0055422	-0.192532	0.459098	0.0412372	0.875134	0.202394	0.435953	-0.0897009	0.732075	0.0638571	0.807632	-0.096804	0.71168	0.517184	0.0335003	0.534607	0.0270397	-0.500435	0.0407654	0.494368	0.0436722	-0.296744	0.247436	0.13578	0.603334	-0.057026	0.827904	-0.440459	0.0768122	-0.20589	0.427898
ENSRNOG00000018094	Sv2c	29643	blue	-0.285472	0.266701	0.667774	0.00339686	0.209119	0.420525	-0.0739407	0.777921	-0.0145875	0.955687	0.0374899	0.886408	-0.187201	0.47186	0.175062	0.501558	-0.479163	0.0516439	-0.522329	0.0314811	0.212899	0.41198	-0.527944	0.0293853	0.522288	0.0314967	-0.336225	0.187	-0.301598	0.239416	0.443518	0.0745484	0.208875	0.42108
ENSRNOG00000007443	Jag1	29146	blue	-0.285384	0.266855	0.546426	0.0232369	0.554797	0.0208054	0.346949	0.172449	0.429604	0.0852489	0.0320548	0.902797	-0.382707	0.129479	-0.405448	0.106396	0.302077	0.238634	-0.0935528	0.720993	0.462214	0.0617619	0.00684664	0.979194	0.126388	0.628836	-0.0546816	0.834886	-0.0717479	0.784358	0.076434	0.770618	-0.361776	0.153611
ENSRNOG00000049405	Olr1540	363762	blue	-0.283281	0.270551	0.476034	0.0534112	-0.0817149	0.75521	-0.266529	0.301098	-0.247112	0.338969	0.202581	0.435522	-0.170694	0.512457	0.359515	0.156388	-0.647263	0.00497315	-0.670447	0.00322552	0.14904	0.568064	-0.650535	0.00468828	0.530678	0.0284047	-0.333654	0.190605	-0.0736527	0.778766	0.428273	0.086328	0.0927186	0.723389
ENSRNOG00000016665	Tpra1	85494	blue	0.282442	0.272033	-0.713571	0.00129724	-0.719549	0.00112904	-0.452794	0.0679829	-0.532586	0.0277354	0.37679	0.136014	0.450206	0.0697704	0.601276	0.010678	-0.279416	0.277423	0.0652621	0.803476	0.0513875	0.844715	-0.126697	0.627992	-0.172041	0.509086	0.550016	0.0221686	0.759879	0.000400945	-0.517949	0.0331943	-0.0123049	0.962616
ENSRNOG00000000164	Lamp2	24944	blue	0.282046	0.272735	-0.514227	0.0347048	-0.550203	0.0221138	-0.270401	0.293862	-0.528719	0.029105	0.00243306	0.992606	0.502624	0.0397537	0.411721	0.10058	-0.329729	0.196197	0.0662436	0.800576	-0.212952	0.411862	0.0454981	0.862342	-0.295541	0.249449	0.264148	0.3056	0.361513	0.153931	-0.143128	0.583681	0.42102	0.0923809
ENSRNOG00000005602	Mthfd1	64300	blue	0.28179	0.273188	-0.691124	0.00212344	-0.723299	0.00103304	-0.367537	0.146684	-0.705847	0.00154455	0.335882	0.187477	0.571657	0.0165117	0.587489	0.013145	-0.358616	0.157502	0.0549729	0.834017	0.0891067	0.733789	-0.0866072	0.741012	-0.331371	0.193844	0.51303	0.0352017	0.65851	0.00404889	-0.413536	0.0989399	0.180737	0.487566
ENSRNOG00000017949	Mvb12a	290635	blue	0.280934	0.274711	-0.809575	8.23e-05	-0.693691	0.00201143	-0.296853	0.247254	-0.559122	0.0196292	0.369716	0.144122	0.600698	0.0107734	0.553902	0.0210554	-0.151299	0.562145	0.220228	0.395681	0.188562	0.468585	0.0926947	0.723458	-0.442466	0.0753215	0.693424	0.00202286	0.780492	0.000218281	-0.590263	0.0126156	0.0631276	0.809791
ENSRNOG00000053812	Selenbp1	140927	blue	0.27487	0.285641	-0.780759	0.000216478	-0.669037	0.00331495	-0.352578	0.165124	-0.355192	0.161794	0.424344	0.0895697	0.391606	0.120066	0.576908	0.0153277	-0.0698087	0.790063	0.189097	0.467301	0.0237226	0.927991	0.021034	0.936136	-0.21518	0.40687	0.506592	0.0379681	0.568515	0.0172536	-0.63482	0.00618703	-0.0636516	0.80824
ENSRNOG00000025602	Cdk4	94201	blue	0.274121	0.287008	-0.650758	0.00466933	-0.441648	0.0759265	0.0611084	0.815775	-0.510235	0.0363832	-0.0736798	0.778686	0.787162	0.000176849	0.26953	0.295481	-0.0250244	0.92405	0.365002	0.149705	0.029436	0.910707	0.515697	0.0341022	-0.814517	6.86e-05	0.683519	0.00248569	0.575707	0.0155923	-0.324359	0.20402	0.446128	0.0726563
ENSRNOG00000010125	Mtrex	365668	blue	0.272625	0.289752	-0.572051	0.0164205	-0.236447	0.360879	0.0903793	0.73012	-0.169622	0.515149	-0.209392	0.419905	0.415907	0.0968276	0.0313979	0.90478	0.245603	0.342021	0.635528	0.00611208	-0.244769	0.343716	0.409384	0.10272	-0.496685	0.0425442	0.470224	0.0568122	0.297368	0.246396	-0.631168	0.00658521	0.266567	0.301028
ENSRNOG00000018552	Slc25a38	301067	blue	0.271068	0.292626	-0.778562	0.000231682	-0.717327	0.00118931	-0.557704	0.0200089	-0.344566	0.175615	0.37688	0.135913	0.0984263	0.707047	0.424698	0.0892742	-0.160988	0.537064	0.0230122	0.930142	-0.300928	0.240514	-0.203933	0.432397	0.0873634	0.738825	0.10315	0.693611	0.339611	0.18232	-0.275869	0.283823	-0.336383	0.186779
ENSRNOG00000008960	Fgf22	170579	blue	-0.270219	0.2942	0.560409	0.0192893	0.702295	0.00167066	0.366842	0.147509	0.703115	0.00164083	-0.0673998	0.797163	-0.593204	0.0120731	-0.589019	0.012851	0.523121	0.0311788	0.0357558	0.891633	0.191301	0.462029	0.0796941	0.761095	0.25814	0.317138	-0.300899	0.240561	-0.384372	0.12768	0.112942	0.666041	-0.431236	0.0839392
ENSRNOG00000019946	Gmppa	501167	blue	0.269106	0.296271	-0.761545	0.000382559	-0.514063	0.0347728	-0.257888	0.317628	-0.185682	0.475529	0.450499	0.0695665	0.260946	0.311717	0.330539	0.195035	0.140146	0.591624	0.222458	0.390792	0.154533	0.553717	0.115003	0.660287	-0.238246	0.35713	0.479347	0.0515411	0.541528	0.0247589	-0.508003	0.0373481	-0.31752	0.214274
ENSRNOG00000048174	Uqcrq	497902	blue	0.268932	0.296595	-0.676986	0.00283581	-0.488186	0.0467921	-0.309404	0.226867	-0.227652	0.379533	0.550051	0.0221584	0.264476	0.304978	0.344972	0.175073	0.0517928	0.843505	0.0651653	0.803762	0.277236	0.281346	0.043336	0.86883	-0.221955	0.391891	0.413487	0.0989844	0.485901	0.0479868	-0.338487	0.183865	-0.323194	0.205744
ENSRNOG00000011528	Alg14	362031	blue	0.267645	0.299002	-0.755542	0.000452276	-0.500846	0.0405741	0.0107367	0.967378	-0.448301	0.0711079	0.155369	0.551548	0.742813	0.000635504	0.381888	0.13037	0.0671595	0.797872	0.411794	0.100514	0.204333	0.431475	0.470938	0.0563857	-0.764962	0.000347047	0.799735	0.000116506	0.711861	0.00134897	-0.586247	0.0133878	0.272355	0.290251
ENSRNOG00000004132	Lasp1	29278	blue	-0.265994	0.302107	0.709011	0.00143896	0.364547	0.150252	-0.144535	0.579947	0.261708	0.310255	0.157087	0.547101	-0.629153	0.00681355	-0.160289	0.538856	-0.216183	0.404635	-0.55578	0.0205333	0.191473	0.461619	-0.61832	0.00815264	0.736776	0.000741821	-0.592627	0.012178	-0.332236	0.192612	0.46364	0.0608576	-0.316708	0.215513
ENSRNOG00000007882	Ablim2	360958	blue	-0.260485	0.312604	0.646476	0.00504374	0.298872	0.243899	-0.220883	0.394242	0.294238	0.251642	0.212825	0.412149	-0.700767	0.00172743	-0.0980581	0.708097	-0.223421	0.38869	-0.561275	0.0190633	0.0971131	0.710796	-0.702833	0.00165103	0.865896	7.05e-06	-0.661957	0.00379533	-0.445335	0.0732273	0.434435	0.0814149	-0.415335	0.0973343
ENSRNOG00000001454	Eif4h	288599	blue	-0.259363	0.314769	0.663581	0.00368047	0.700522	0.00173668	0.386454	0.125455	0.520652	0.0321289	-0.383754	0.128345	-0.469948	0.0569773	-0.57771	0.0151528	0.324419	0.203932	0.110317	0.673396	-0.0564428	0.829639	0.0471619	0.857356	0.229726	0.375087	-0.387398	0.124455	-0.464169	0.0605254	0.126047	0.629771	-0.0220012	0.933205
ENSRNOG00000056325	Mocs2	294753	blue	0.258214	0.316994	-0.705549	0.00155483	-0.442921	0.0749864	-0.108745	0.677813	-0.178714	0.492532	0.213764	0.41004	0.303773	0.235877	0.267145	0.29994	0.196333	0.450105	0.400665	0.110988	0.00355471	0.989197	0.242792	0.347751	-0.345091	0.174913	0.486418	0.0477146	0.509625	0.0366451	-0.684133	0.00245469	-0.102978	0.6941
ENSRNOG00000050183	RT1-CE1	309600	blue	0.25707	0.319219	-0.623206	0.00752486	-0.575881	0.0155538	-0.302903	0.237288	-0.484039	0.0489772	0.0426433	0.870909	0.287236	0.263626	0.2398	0.353907	-0.188494	0.468748	0.0885964	0.735262	-0.403279	0.108462	0.0376262	0.885998	-0.253891	0.32545	0.0957095	0.714811	0.269368	0.295782	-0.122225	0.640272	0.0909878	0.728367
ENSRNOG00000009857	Ftsj3	303608	blue	0.255527	0.322235	-0.713796	0.00129053	-0.392856	0.118784	0.0297635	0.909718	-0.254463	0.324323	-0.0766508	0.769983	0.507655	0.0375003	0.199387	0.442947	0.197807	0.446644	0.583456	0.0139458	-0.19863	0.444716	0.451851	0.0686305	-0.570819	0.016707	0.521265	0.0318909	0.391281	0.120401	-0.628808	0.00685324	0.270671	0.293361
ENSRNOG00000025624	Arhgap20	367085	blue	0.254319	0.324606	-0.63198	0.00649486	-0.311082	0.224226	0.206891	0.425606	-0.296041	0.248611	-0.147305	0.572629	0.726445	0.000957813	0.206699	0.426045	0.192941	0.458125	0.574683	0.0158209	-0.0170817	0.948119	0.648629	0.00485261	-0.819509	5.68e-05	0.690959	0.00213085	0.404309	0.107477	-0.551008	0.02188	0.4355	0.0805874
ENSRNOG00000022748	Tmem126a	293113	blue	0.254206	0.324828	-0.678442	0.00275452	-0.563484	0.0184963	-0.30143	0.23969	-0.204402	0.431318	0.367084	0.147222	0.238116	0.3574	0.476063	0.0533942	0.00635614	0.980684	0.143188	0.583521	-0.0406865	0.87679	0.0523018	0.841985	-0.113174	0.665393	0.30987	0.226132	0.395298	0.116306	-0.495609	0.0430654	-0.177245	0.496154
ENSRNOG00000006785	Dcaf8	364050	blue	-0.252966	0.327274	0.66496	0.00358516	0.177861	0.494633	-0.124577	0.633801	-0.0473049	0.856928	0.20087	0.43949	-0.200254	0.440925	0.206551	0.426383	-0.494165	0.043772	-0.674806	0.00296122	0.275376	0.284718	-0.540587	0.0250599	0.48434	0.0488166	-0.374223	0.138919	-0.285952	0.265863	0.522606	0.0313753	0.150547	0.564112
ENSRNOG00000016076	Pip	64673	blue	-0.251054	0.331069	0.607712	0.00966032	0.343751	0.176706	0.0345555	0.895252	0.183436	0.480976	0.162371	0.533525	-0.300752	0.240801	-0.066438	0.800002	-0.175286	0.501003	-0.44628	0.0725472	0.442969	0.0749509	-0.34826	0.170723	0.381944	0.130309	-0.294301	0.251535	-0.273827	0.287548	0.417794	0.0951686	-0.122016	0.640847
ENSRNOG00000010119	Zmat3	64394	blue	-0.248977	0.335218	0.736685	0.000743526	0.5892	0.0128165	0.287964	0.262365	0.43971	0.0773741	-0.0875008	0.738428	-0.288622	0.261228	-0.197613	0.447097	0.0844121	0.747373	-0.14876	0.5688	0.389808	0.121928	-0.111538	0.66997	0.289714	0.259346	-0.144714	0.579472	-0.268496	0.297409	0.081828	0.75488	0.0504272	0.847585
ENSRNOG00000014179	Rps2	83789	blue	0.247267	0.338656	-0.634261	0.0062466	-0.623127	0.0075347	-0.349486	0.16912	-0.366279	0.148178	0.352215	0.165589	0.391562	0.120112	0.524257	0.0307489	-0.19451	0.454407	-0.0373427	0.886852	0.0408183	0.876394	0.00760902	0.976878	-0.187985	0.469972	0.442051	0.0756278	0.568079	0.0173588	-0.258085	0.317245	-0.051827	0.843402
ENSRNOG00000018576	Rcan3	362627	blue	-0.245905	0.34141	0.563569	0.0184745	0.256018	0.321272	0.183367	0.481144	-0.0304496	0.907645	0.0848956	0.745971	0.136964	0.60015	0.255686	0.321922	-0.260618	0.312348	-0.223228	0.38911	0.524458	0.0306737	-0.183692	0.480354	0.0630532	0.810012	0.145928	0.576262	-0.0266288	0.919195	-0.0812548	0.756548	0.430843	0.0842538
ENSRNOG00000055286	LOC103689986	292768	blue	0.244404	0.344459	-0.759389	0.000406493	-0.69023	0.00216364	-0.301658	0.239318	-0.540566	0.0250667	0.437063	0.0793831	0.581372	0.0143745	0.62889	0.00684382	-0.193711	0.456298	0.130943	0.616417	0.204079	0.432061	0.0495968	0.850068	-0.370477	0.143234	0.604996	0.0100798	0.6365	0.00601039	-0.487345	0.0472296	0.0926513	0.723582
ENSRNOG00000021317	Cct2	299809	blue	0.24027	0.352935	-0.777369	0.000240304	-0.690853	0.00213556	-0.445193	0.0733302	-0.37134	0.142232	0.442901	0.0750013	0.305736	0.232711	0.550178	0.0221211	-0.140003	0.592006	0.119874	0.646763	-0.00202803	0.993837	-0.0937465	0.720437	-0.0882824	0.736169	0.363783	0.151173	0.487548	0.0471238	-0.45984	0.0632883	-0.146217	0.575498
ENSRNOG00000032922	Dclk1	83825	blue	-0.239382	0.354772	0.709927	0.0014095	0.337675	0.184985	-0.169365	0.515796	0.281271	0.274112	0.123977	0.63545	-0.681928	0.0025675	-0.15768	0.545571	-0.243309	0.346692	-0.602179	0.0105303	0.0444102	0.865605	-0.652616	0.00451404	0.806266	9.27e-05	-0.700794	0.00172643	-0.476882	0.0529279	0.532336	0.0278222	-0.31221	0.222461
ENSRNOG00000020302	Klhl17	246757	blue	0.23368	0.366691	-0.63741	0.00591653	-0.705073	0.00157135	-0.442038	0.0756376	-0.541441	0.0247867	0.384469	0.127576	0.356221	0.160496	0.556305	0.0203892	-0.361051	0.154498	-0.140843	0.589763	-0.134569	0.606601	-0.156421	0.548822	-0.111594	0.669813	0.158975	0.542233	0.247642	0.3379	-0.0503336	0.847864	0.0765105	0.770394
ENSRNOG00000004688	Rbfox2	362950	blue	-0.232973	0.368186	0.804551	9.85e-05	0.517485	0.0333798	0.117649	0.652929	0.343637	0.176858	-0.247179	0.338833	-0.524921	0.0305001	-0.33406	0.190032	-0.120567	0.644848	-0.398628	0.112985	-0.0977985	0.708839	-0.333863	0.19031	0.546753	0.0231381	-0.623155	0.0075312	-0.597215	0.0113627	0.559211	0.0196053	-0.0263697	0.919979
ENSRNOG00000021130	Abcc8	25559	blue	0.231915	0.370426	-0.746727	0.000573588	-0.595284	0.0117004	-0.153296	0.556934	-0.488798	0.0464764	0.319578	0.211155	0.606707	0.00981394	0.488611	0.0465726	-0.0677683	0.796076	0.251031	0.331113	0.205589	0.428588	0.207448	0.424331	-0.516312	0.0338524	0.662427	0.00376185	0.624135	0.00740999	-0.521027	0.0319833	0.111457	0.670198
ENSRNOG00000006206	Tmem106b	312132	blue	0.225783	0.383564	-0.46221	0.0617642	-0.447689	0.0715417	-0.13976	0.592655	-0.474739	0.0541553	-0.0148767	0.954809	0.521613	0.0317565	0.368893	0.145086	-0.263089	0.307616	0.113619	0.664151	-0.194388	0.454697	0.131815	0.614052	-0.3475	0.171721	0.157102	0.547063	0.045093	0.863557	-0.0196369	0.94037	0.529592	0.0287913
ENSRNOG00000002566	Tnp2	24840	blue	-0.22227	0.391202	0.4969	0.0424408	0.404825	0.106986	0.0797778	0.760852	0.454995	0.0664896	-0.105132	0.688002	-0.626999	0.00706458	-0.355852	0.160961	0.134542	0.606674	-0.262003	0.309691	-0.273442	0.288253	-0.173499	0.505447	0.497841	0.0419896	-0.703038	0.00164361	-0.717283	0.00119054	0.469253	0.0573957	-0.367817	0.146353
ENSRNOG00000017707	Abi2	286928	blue	-0.211028	0.416198	0.552497	0.0214527	0.482463	0.0498277	0.280377	0.275704	0.367831	0.146337	0.0394977	0.880365	-0.287221	0.263653	-0.233666	0.36672	0.164079	0.52917	-0.151479	0.561675	0.37588	0.137039	-0.0690077	0.792422	0.18541	0.476185	-0.0778049	0.76661	-0.21824	0.400067	0.0777103	0.766886	-0.165713	0.52502
ENSRNOG00000015068	Il11ra1	245983	blue	0.208415	0.422127	-0.763461	0.000362294	-0.663112	0.00371339	-0.285639	0.266409	-0.443898	0.0742708	0.445493	0.073113	0.51324	0.0351142	0.582471	0.0141471	-0.104254	0.690484	0.16341	0.530873	0.240942	0.351549	0.0816112	0.755511	-0.359028	0.156991	0.679348	0.00270487	0.780797	0.000216224	-0.583564	0.013924	-0.0309214	0.90622
ENSRNOG00000024497	U2af1l4	361542	blue	0.208339	0.4223	-0.753451	0.000478919	-0.490281	0.0457168	-0.0577039	0.825887	-0.336185	0.187055	-0.0722306	0.78294	0.537589	0.0260379	0.268571	0.297268	0.0810667	0.757096	0.477392	0.0526384	-0.293606	0.252709	0.411206	0.101049	-0.54509	0.0236447	0.485591	0.0481509	0.389706	0.122035	-0.456857	0.0652455	0.265683	0.302694
ENSRNOG00000018691	Aurkaip1	298686	blue	0.207753	0.423635	-0.703951	0.00161086	-0.550832	0.021931	-0.405049	0.106774	-0.180899	0.487168	0.471323	0.0561567	0.0374749	0.886454	0.312237	0.22242	0.0329026	0.900238	0.0319152	0.903219	-0.118698	0.65002	-0.0679016	0.795683	0.0126792	0.961479	0.0816479	0.755404	0.231002	0.372367	-0.210036	0.418445	-0.423451	0.0903191
ENSRNOG00000019661	Gdf15	29455	blue	0.201927	0.437036	-0.625285	0.00726968	-0.583783	0.0138796	-0.285466	0.266712	-0.43533	0.0807191	0.24471	0.343837	0.357439	0.158969	0.444436	0.0738792	-0.135199	0.604902	0.195922	0.451073	0.0366081	0.889065	-0.0267744	0.918755	-0.218051	0.400485	0.518903	0.0328152	0.738142	0.000716557	-0.626894	0.00707712	-0.0428135	0.870398
ENSRNOG00000020068	Ndufaf3	56769	blue	0.198223	0.445668	-0.704667	0.00158555	-0.646745	0.00501952	-0.319195	0.211733	-0.414257	0.098294	0.583408	0.0139556	0.460161	0.06308	0.604381	0.0101769	-0.138785	0.595265	-0.0168739	0.948749	0.316776	0.215409	0.0319169	0.903213	-0.304282	0.235053	0.565225	0.0180585	0.632346	0.00645457	-0.378789	0.133781	-0.108929	0.677294
ENSRNOG00000030845	Olr1126	405179	blue	-0.194766	0.453802	0.372351	0.141064	0.39746	0.114142	0.22309	0.389412	0.51478	0.0344773	-0.131564	0.614731	-0.457408	0.0648808	-0.268975	0.296515	0.287318	0.263484	0.0115788	0.96482	-0.0862171	0.742142	0.026869	0.918469	0.320388	0.209935	-0.395097	0.116508	-0.519131	0.0327249	0.0840984	0.748283	-0.291541	0.256218
ENSRNOG00000026517	Vrk3	361565	blue	0.193604	0.456552	-0.635833	0.00608006	-0.46505	0.0599737	-0.278275	0.279471	-0.168308	0.518457	0.404938	0.106879	0.19271	0.458674	0.318388	0.212955	0.0602485	0.818327	0.134012	0.608104	0.0509747	0.845949	0.0413997	0.874646	-0.151545	0.561502	0.309757	0.22631	0.376284	0.136583	-0.360566	0.155092	-0.175886	0.499516
ENSRNOG00000049110	Dpm2	29640	blue	0.192387	0.459442	-0.687967	0.00226817	-0.202441	0.435845	0.141749	0.587349	0.0823383	0.753396	-0.0812913	0.756442	0.225328	0.384547	-0.0642957	0.806334	0.538092	0.0258719	0.683723	0.00247536	-0.271092	0.292582	0.585303	0.0135745	-0.506192	0.0381455	0.390491	0.121219	0.224846	0.385594	-0.649095	0.00481197	-0.104069	0.691009
ENSRNOG00000013992	Arfrp1	117051	blue	0.191776	0.460896	-0.453647	0.0674017	-0.358011	0.158255	-0.498871	0.0415002	0.0309653	0.906087	0.282095	0.272647	-0.33233	0.19248	0.0934209	0.721372	0.0271572	0.917597	0.0448681	0.864232	-0.341301	0.180015	-0.366442	0.147984	0.456351	0.0655822	-0.208543	0.421836	0.0321355	0.902553	-0.214804	0.40771	-0.57568	0.0155984
ENSRNOG00000006674	Rflnb	287534	blue	0.190859	0.463084	-0.686002	0.00236228	-0.365613	0.148974	0.0993098	0.704528	-0.216523	0.403877	0.031351	0.904922	0.536299	0.0264677	0.223489	0.388543	0.262175	0.309361	0.510316	0.0363487	-0.00965145	0.970674	0.551075	0.0218607	-0.676366	0.00287104	0.662185	0.00377909	0.544249	0.0239041	-0.649274	0.00479651	0.116152	0.657089
ENSRNOG00000008431	Gabbr2	83633	blue	-0.1907	0.463463	0.656254	0.00422212	0.379301	0.133213	-0.0382636	0.884079	0.262954	0.307874	-0.0398512	0.879302	-0.421424	0.0920357	-0.105149	0.687954	-0.17033	0.513372	-0.3644	0.150428	-0.00610345	0.981452	-0.401076	0.110588	0.559294	0.0195834	-0.525948	0.0301179	-0.47714	0.0527812	0.360061	0.155714	0.0246139	0.925293
ENSRNOG00000002636	Abat	81632	blue	-0.189802	0.46561	0.794912	0.000137188	0.508843	0.0369827	0.152624	0.558686	0.209665	0.419286	-0.125502	0.631265	-0.228415	0.377893	-0.160259	0.538932	-0.185518	0.475925	-0.358286	0.157912	0.247991	0.337197	-0.281843	0.273094	0.348649	0.170213	-0.300047	0.241961	-0.366359	0.148083	0.40097	0.110691	0.214182	0.409103
ENSRNOG00000000422	Dxo	361799	blue	0.188067	0.469774	-0.678713	0.00273956	-0.367838	0.146328	-0.100159	0.702109	-0.146154	0.575666	-0.0600304	0.818975	0.20252	0.435663	0.0173005	0.947455	0.21139	0.415382	0.432762	0.0827284	-0.355437	0.161485	0.278182	0.279638	-0.293416	0.253031	0.280776	0.274993	0.310182	0.22564	-0.335311	0.188276	-0.122882	0.638462
ENSRNOG00000017960	Deaf1	83632	blue	-0.185887	0.475033	0.743391	0.000626027	0.453842	0.067269	0.187948	0.470061	0.168558	0.517828	0.00403888	0.987726	-0.154866	0.552851	-0.0540514	0.836764	-0.162653	0.532804	-0.400816	0.110841	0.300522	0.24118	-0.205755	0.428206	0.228731	0.377216	-0.250365	0.332441	-0.397697	0.113907	0.333134	0.191339	0.212816	0.412168
ENSRNOG00000000471	B3galt4	171079	blue	0.184411	0.478607	-0.751048	0.000511135	-0.448504	0.0709647	-0.135014	0.605399	-0.141454	0.588134	0.20118	0.438771	0.23091	0.372561	0.199324	0.443094	0.228482	0.377749	0.397763	0.113842	-0.13198	0.613604	0.264385	0.305151	-0.328159	0.198464	0.343891	0.176518	0.343162	0.177497	-0.522965	0.0312383	-0.151192	0.562425
ENSRNOG00000017907	Ube2i	25573	blue	-0.179137	0.491491	0.710919	0.00137817	0.305727	0.232725	-0.0449725	0.863919	0.0826423	0.752512	0.253849	0.325531	-0.226966	0.381009	0.108119	0.679575	-0.33936	0.182665	-0.624411	0.0073761	0.452779	0.0679936	-0.47722	0.0527361	0.445405	0.0731772	-0.26181	0.310059	-0.232827	0.368494	0.401615	0.110065	0.0118405	0.964026
ENSRNOG00000036688	Arhgdia	360678	blue	-0.175556	0.500333	0.700379	0.0017421	0.438606	0.0782069	0.00600904	0.981739	0.265381	0.303264	0.182421	0.48345	-0.407757	0.104228	-0.148703	0.56895	-0.114068	0.662897	-0.462786	0.0613976	0.385404	0.126573	-0.419509	0.0936796	0.466624	0.0589987	-0.319267	0.211624	-0.243078	0.347165	0.315621	0.217179	-0.133609	0.609194
ENSRNOG00000000842	Ddah2	294239	blue	0.174944	0.501851	-0.383793	0.128303	-0.185927	0.474935	-0.21324	0.411216	0.0821061	0.754071	-0.100548	0.701002	-0.244957	0.343332	-0.255079	0.323112	0.178639	0.492716	0.0572052	0.827371	-0.631418	0.00655729	0.0793649	0.762056	0.0850311	0.745578	-0.311511	0.223553	-0.129121	0.621375	0.249733	0.333704	-0.395133	0.116472
ENSRNOG00000007926	Map2k5	29568	blue	0.17466	0.502558	-0.687294	0.00230005	-0.432032	0.0833066	-0.264644	0.30466	-0.0519626	0.842997	0.20102	0.439141	-0.0808636	0.757688	0.0532781	0.839071	0.213345	0.410979	0.230758	0.372885	-0.36995	0.143849	0.0850606	0.745492	-0.0486513	0.852896	-0.00954162	0.971007	0.148177	0.570332	-0.26529	0.303437	-0.414785	0.0978232
ENSRNOG00000030027	Fbxw17	361219	blue	0.173881	0.504495	-0.623279	0.00751576	-0.486533	0.0476545	-0.321174	0.208755	-0.172493	0.507955	0.367363	0.14689	0.224084	0.387247	0.382053	0.13019	0.00973723	0.970413	0.165579	0.525358	0.0687222	0.793263	-0.0278518	0.915496	-0.0824932	0.752946	0.467932	0.058197	0.528481	0.0291908	-0.499315	0.0412909	-0.240221	0.353037
ENSRNOG00000011000	Rims1	84556	blue	-0.173201	0.506189	0.635823	0.00608111	0.563548	0.0184799	0.157469	0.546113	0.550058	0.0221564	0.0387632	0.882575	-0.529837	0.0287038	-0.338478	0.183877	0.206952	0.425466	-0.201054	0.439063	0.292656	0.254319	-0.219464	0.397363	0.459584	0.0634541	-0.237748	0.358165	-0.262109	0.309488	0.103843	0.691649	-0.393684	0.11794
ENSRNOG00000018440	Arfip2	293344	blue	0.165617	0.525262	-0.573953	0.0159854	-0.30086	0.240625	-0.255586	0.322119	0.0848377	0.746138	0.124237	0.634734	-0.220732	0.394572	-0.0543829	0.835776	0.269275	0.295955	0.30568	0.2328	-0.400156	0.111485	-0.007209	0.978093	0.114725	0.661062	-0.0856278	0.743849	0.028006	0.91503	-0.338587	0.183727	-0.473244	0.0550246
ENSRNOG00000021103	Nrxn2	116595	blue	-0.164516	0.52806	0.580021	0.0146579	0.268933	0.296594	-0.0682694	0.794598	0.0917197	0.726261	0.156567	0.548446	-0.261518	0.310619	1.98e-05	0.99994	-0.257291	0.318788	-0.506452	0.0380299	0.247124	0.338944	-0.391366	0.120314	0.395814	0.115787	-0.334195	0.189842	-0.216869	0.403108	0.428486	0.0861547	0.038013	0.884833
ENSRNOG00000019184	Npr3	25339	blue	-0.164413	0.528322	0.314226	0.21933	0.157972	0.544817	-0.175438	0.500626	0.189139	0.467201	0.394292	0.117322	-0.384459	0.127586	0.0159369	0.951592	-0.0411093	0.875519	-0.260544	0.312491	0.546506	0.0232127	-0.487901	0.0469403	0.488488	0.0466363	0.048707	0.85273	0.338803	0.18343	-0.171072	0.51151	-0.521949	0.0316269
ENSRNOG00000011078	LOC100912604	84596	blue	0.164148	0.528995	-0.661211	0.0038491	-0.298398	0.244685	-0.0129893	0.960538	-0.0377556	0.885609	-0.120684	0.644523	0.248399	0.336378	0.0585842	0.82327	0.296498	0.247847	0.574118	0.015948	-0.389795	0.121941	0.404519	0.107277	-0.350571	0.16771	0.242759	0.347819	0.109903	0.674557	-0.456301	0.0656152	0.0651301	0.803866
ENSRNOG00000005301	Eif2b4	117019	blue	0.160297	0.538836	-0.461646	0.0621246	-0.163488	0.530675	0.0554814	0.832502	-0.000280554	0.999147	-0.325532	0.202294	0.146438	0.574914	-0.137436	0.598883	0.270292	0.294065	0.518178	0.0331029	-0.443635	0.0744629	0.344483	0.175725	-0.270739	0.293235	0.243951	0.345382	0.225912	0.383283	-0.362413	0.152834	0.0337312	0.897738
ENSRNOG00000045649	Arrdc3	309945	blue	-0.159365	0.54123	0.437933	0.0787182	0.178995	0.49184	0.130546	0.617496	-0.0777307	0.766826	-0.490191	0.0457628	0.0511792	0.845337	0.00326049	0.990091	-0.328589	0.197841	-0.0503227	0.847897	-0.302743	0.237549	-0.113639	0.664094	0.136518	0.601348	-0.296929	0.247126	-0.448103	0.0712476	0.268712	0.297006	0.649956	0.00473772
ENSRNOG00000019749	Ube2j2	298689	blue	0.158485	0.543495	-0.689939	0.00217687	-0.391036	0.120654	-0.0840418	0.748448	-0.200948	0.439308	0.208077	0.422898	0.379158	0.133372	0.244035	0.34521	0.186528	0.473482	0.475181	0.0539005	0.188162	0.469546	0.24438	0.344507	-0.388529	0.123264	0.611767	0.00905979	0.600571	0.0107945	-0.662646	0.00374631	-0.0793017	0.76224
ENSRNOG00000019079	Polr1c	301246	blue	0.148171	0.570347	-0.72941	0.000891097	-0.550415	0.0220521	-0.252398	0.328399	-0.304997	0.2339	0.0762481	0.771161	0.300256	0.241617	0.288596	0.261272	0.000821903	0.997502	0.344275	0.176004	-0.252124	0.328943	0.117836	0.652408	-0.237343	0.359008	0.390212	0.121508	0.500253	0.0408506	-0.46665	0.0589827	-0.0361014	0.890591
ENSRNOG00000011543	Fam118b	315549	blue	0.138806	0.595208	-0.70198	0.00168224	-0.309416	0.226848	0.112773	0.666515	-0.121945	0.641043	-0.00348346	0.989414	0.380486	0.131905	0.0268128	0.918639	0.363751	0.151211	0.514205	0.0347139	-0.0904065	0.730041	0.579463	0.0147763	-0.647243	0.00497498	0.507715	0.0374741	0.447341	0.0717889	-0.463507	0.0609421	-0.020019	0.939212
ENSRNOG00000058983	Gata5	499951	blue	0.122323	0.640001	-0.543868	0.0240225	-0.55839	0.0198244	-0.371715	0.141798	-0.236732	0.360284	0.414169	0.098373	0.243576	0.346147	0.587769	0.0130909	-0.164744	0.527479	0.0402304	0.878161	0.141141	0.58897	-0.151469	0.561701	0.0450339	0.863734	0.428074	0.0864903	0.552721	0.021389	-0.489036	0.0463539	-0.154362	0.554162
ENSRNOG00000014248	Erbb4	59323	blue	-0.103972	0.691283	0.650507	0.00469069	0.327625	0.199239	-0.0207731	0.936926	0.188362	0.469066	-0.149175	0.567708	-0.282551	0.271841	-0.0182445	0.944592	-0.276129	0.28335	-0.337812	0.184797	-0.0297906	0.909636	-0.410095	0.102065	0.539775	0.025322	-0.42167	0.0918263	-0.474237	0.0544461	0.317392	0.214469	0.19316	0.457605
ENSRNOG00000004287	Wdr83	288924	blue	0.100826	0.700212	-0.630327	0.00667977	-0.562239	0.0188143	-0.303413	0.236459	-0.416132	0.0966287	0.31928	0.211604	0.249281	0.334609	0.371625	0.141902	-0.125458	0.631384	0.164319	0.528559	0.0754201	0.773585	-0.0933856	0.721473	-0.148053	0.570659	0.348415	0.170521	0.537199	0.0261672	-0.43496	0.081006	-0.138996	0.594699
ENSRNOG00000017138	Olr149	293289	blue	-0.0989894	0.705441	0.445153	0.0733586	0.408789	0.10327	0.203899	0.432476	0.400474	0.111174	-0.193696	0.456335	-0.249784	0.333601	-0.280275	0.275887	0.116381	0.65645	-0.171865	0.509525	-0.0196401	0.94036	0.0523365	0.841881	0.199442	0.442819	-0.278941	0.278275	-0.426512	0.0877705	0.440052	0.0771169	-0.0249347	0.924322
ENSRNOG00000000250	Jmjd6	360665	blue	0.0937835	0.720331	-0.51475	0.0344895	-0.523683	0.0309656	-0.346996	0.172387	-0.31129	0.2239	0.500822	0.0405854	0.182035	0.484392	0.47171	0.0559275	-0.131497	0.614913	-0.0486486	0.852905	0.18079	0.487436	-0.114536	0.661591	-0.0771372	0.768561	0.280321	0.275804	0.499256	0.0413187	-0.372248	0.141182	-0.23096	0.372456
ENSRNOG00000043060	Dnajc4	361717	blue	0.0868145	0.740413	-0.679168	0.00271469	-0.441638	0.0759339	-0.111559	0.669913	-0.182289	0.483773	-0.104856	0.688781	0.254219	0.324803	0.136264	0.602032	0.107837	0.680367	0.405528	0.106321	-0.378777	0.133794	0.286461	0.264975	-0.297352	0.246422	0.270932	0.292877	0.306244	0.231895	-0.30257	0.23783	-0.00583926	0.982255
ENSRNOG00000016979	Olr144	293282	blue	-0.0867083	0.74072	0.540415	0.0251152	0.239689	0.354137	0.0181548	0.944864	-0.118666	0.650108	0.0997643	0.703233	0.0684918	0.793942	0.0605039	0.817569	-0.347952	0.171128	-0.426561	0.08773	0.50325	0.0394679	-0.287664	0.262885	0.119237	0.648525	0.00651027	0.980216	0.0117517	0.964295	0.340608	0.180958	0.199295	0.44316
ENSRNOG00000049712	Olr1174	405390	blue	-0.075727	0.772687	0.593956	0.0119372	0.317347	0.214537	-0.0193216	0.941326	0.106502	0.684131	-0.229826	0.374874	-0.32071	0.20945	-0.225388	0.384419	-0.264723	0.30451	-0.410275	0.1019	-0.167066	0.521593	-0.349955	0.16851	0.455061	0.0664452	-0.540517	0.0250825	-0.505271	0.0385556	0.647937	0.00491337	0.0553202	0.832983
ENSRNOG00000005963	Rab2a	65158	blue	0.0686704	0.793416	-0.584981	0.0136387	-0.335021	0.188683	0.0357993	0.891502	-0.273751	0.287685	-0.159833	0.540026	0.293299	0.253229	0.0225835	0.931441	0.128636	0.622697	0.45193	0.0685762	-0.247655	0.337873	0.340099	0.181653	-0.428223	0.0863683	0.237079	0.35956	0.250988	0.3312	-0.276023	0.283543	0.0472206	0.85718
ENSRNOG00000015787	P3h4	59101	blue	0.0664321	0.800019	-0.661792	0.00380721	-0.244289	0.344693	0.158667	0.543026	-0.0531933	0.839324	-0.0491024	0.851547	0.2862	0.26543	-0.0296039	0.9102	0.428421	0.0862076	0.630618	0.00664689	-0.0799327	0.7604	0.530649	0.028415	-0.558819	0.0197097	0.5013	0.0403633	0.441367	0.0761348	-0.600674	0.0107774	-0.0662942	0.800426
ENSRNOG00000009855	Serpina5	65051	blue	-0.0592003	0.821439	0.57866	0.0149477	0.247241	0.338709	0.0457692	0.86153	0.000371627	0.998871	-0.118017	0.651907	-0.0605754	0.817357	0.0221467	0.932764	-0.310276	0.225492	-0.378701	0.133879	0.142453	0.585475	-0.265127	0.303745	0.247232	0.338726	-0.139019	0.594639	-0.115241	0.659625	0.278356	0.279327	0.219724	0.396791
ENSRNOG00000029280	Gpaa1	300046	blue	-0.0591995	0.821442	-0.567853	0.0174135	-0.453162	0.0677316	-0.220052	0.396069	-0.0968605	0.711518	0.286587	0.264755	0.0649465	0.804409	0.357847	0.158459	0.0641607	0.806733	0.233635	0.366787	-0.0405132	0.877311	0.00281534	0.991444	-0.0142579	0.956687	0.249814	0.333542	0.358273	0.157929	-0.496763	0.0425067	-0.238112	0.357408
ENSRNOG00000009993	Dcps	266605	blue	-0.0574459	0.826654	0.373665	0.139556	0.272957	0.289143	-0.124487	0.634047	0.415905	0.0968294	0.357877	0.158422	-0.514317	0.0346678	-0.054695	0.834845	0.117327	0.653822	-0.248912	0.335348	0.336737	0.186286	-0.416811	0.0960306	0.577292	0.0152437	-0.125884	0.630217	0.0108734	0.966962	-0.179151	0.491457	-0.556745	0.0202689
ENSRNOG00000006324	Trpc6	89823	blue	0.0562098	0.830333	-0.480376	0.0509708	-0.0986054	0.706536	0.285831	0.266074	0.0511575	0.845402	-0.211351	0.41547	0.234029	0.365956	-0.12728	0.626398	0.442431	0.0753473	0.566112	0.0178387	-0.256163	0.320989	0.592156	0.0122642	-0.530152	0.0285913	0.314508	0.218894	0.0824774	0.752992	-0.388912	0.122863	0.0458888	0.861171
ENSRNOG00000016552	Hmgcs1	29637	blue	0.0503206	0.847904	0.420367	0.0929408	0.318703	0.212478	0.0523972	0.8417	0.234414	0.365144	0.00471969	0.985657	-0.151079	0.56272	-0.142665	0.584911	-0.0121851	0.962979	-0.205278	0.429302	0.247432	0.338324	-0.166735	0.522431	0.216727	0.403423	-0.0129777	0.960573	-0.0578135	0.825561	0.11174	0.669406	-0.000982267	0.997015
ENSRNOG00000002393	Eprs	289352	blue	0.0486431	0.852921	-0.602454	0.0104857	-0.491521	0.045089	-0.218804	0.39882	-0.15521	0.551961	0.282131	0.272583	0.126689	0.628014	0.361099	0.154438	0.0545789	0.835192	0.20201	0.436843	-0.0487401	0.852631	0.0558711	0.831342	-0.104298	0.690361	0.289059	0.260473	0.449461	0.070291	-0.507234	0.0376852	-0.201456	0.438129
ENSRNOG00000003267	Pycr2	364064	blue	0.0451904	0.863265	-0.61026	0.00927935	-0.579539	0.0147601	-0.208478	0.421983	-0.413509	0.0989644	0.45809	0.064431	0.451768	0.0686877	0.599598	0.0109569	-0.135347	0.604503	0.0638015	0.807796	0.231285	0.371764	0.0792318	0.762444	-0.321257	0.208631	0.484669	0.0486405	0.506403	0.0380519	-0.404095	0.107681	0.0274426	0.916734
ENSRNOG00000048706	Nox1	114243	blue	0.0417792	0.873505	0.229924	0.374663	0.300588	0.241071	0.0294688	0.910608	0.482946	0.0495659	0.135372	0.604434	-0.423881	0.089958	-0.158058	0.544594	0.322843	0.206266	0.0426206	0.870978	0.0934004	0.721431	-0.133058	0.610683	0.379751	0.132715	-0.0924342	0.724206	-0.102802	0.6946	-0.337376	0.185399	-0.438112	0.0785825
ENSRNOG00000013507	Selenot	365802	blue	0.0393245	0.880886	-0.252856	0.327492	-0.15079	0.563475	0.19129	0.462056	-0.314495	0.218914	-0.390324	0.121391	0.466112	0.0593146	0.0424964	0.871351	-0.0613325	0.815111	0.288261	0.261851	-0.374483	0.138622	0.421007	0.0923922	-0.515358	0.0342403	0.0410286	0.875761	-0.201884	0.437137	0.127006	0.627147	0.631307	0.00656967
ENSRNOG00000016033	Endog	362100	blue	0.0165172	0.949831	-0.592267	0.0122438	-0.434847	0.0810942	-0.125916	0.630128	-0.144486	0.580079	0.343012	0.177699	0.272025	0.290858	0.442353	0.0754047	0.105462	0.687068	0.317425	0.214418	0.222286	0.391168	0.129158	0.621274	-0.210251	0.417957	0.513093	0.0351755	0.549252	0.0223925	-0.691752	0.00209559	-0.132681	0.611705
ENSRNOG00000011330	Ces2a	246252	brown	-0.709194	0.00143302	0.53411	0.0272096	0.402925	0.108801	0.194929	0.453418	0.489646	0.0460407	0.0826038	0.752624	-0.647357	0.00496482	-0.233544	0.366978	0.183235	0.481467	-0.179614	0.49032	0.351316	0.166748	-0.185065	0.477021	0.467328	0.0585659	-0.269093	0.296295	0.00552252	0.983217	0.167268	0.521083	-0.575993	0.015529
ENSRNOG00000017089	Prl6a1	24657	brown	-0.671823	0.00314009	0.445784	0.0729038	0.187772	0.470485	0.0634473	0.808845	0.211181	0.415854	0.0838024	0.749142	-0.460041	0.0631579	0.0272173	0.917415	-0.0784851	0.764623	-0.243493	0.346317	0.158723	0.542881	-0.290956	0.257215	0.451538	0.0688466	-0.292336	0.254862	-0.0804261	0.758962	0.162083	0.534262	-0.32421	0.20424
ENSRNOG00000017466	Kif5b	117550	brown	0.609683	0.00936456	-0.501465	0.040287	-0.44399	0.0742034	-0.196068	0.45073	-0.673771	0.00302232	-0.112591	0.667023	0.746426	0.000578154	0.253435	0.326348	-0.341464	0.179793	0.118865	0.649554	-0.207657	0.423855	0.147449	0.572248	-0.541292	0.0248342	0.304138	0.235285	0.145398	0.577664	-0.0113512	0.965511	0.677861	0.00278671
ENSRNOG00000020500	Clk2	65169	brown	0.59604	0.0115673	-0.269544	0.295454	-0.350734	0.1675	-0.294652	0.250944	-0.464155	0.0605342	0.0463841	0.859686	0.471744	0.0559068	0.303072	0.237013	-0.376726	0.136086	-0.174677	0.502515	-0.305967	0.232339	-0.0689912	0.79247	-0.198667	0.444629	0.0229247	0.930408	-0.14242	0.585563	0.133301	0.610026	0.576287	0.0154641
ENSRNOG00000003400	Fmo4	246247	brown	0.595868	0.0115975	-0.351039	0.167105	-0.185505	0.475957	-0.0313968	0.904784	-0.37838	0.134235	-0.200398	0.440588	0.615766	0.00849708	0.0368772	0.888254	-0.0963323	0.713029	0.230072	0.374348	-0.154716	0.553242	0.271484	0.291857	-0.530739	0.0283831	0.315487	0.217385	0.0631238	0.809802	-0.0811969	0.756717	0.616275	0.00842761
ENSRNOG00000056708	Nkapl	291165	brown	0.585912	0.0134537	-0.486664	0.0475855	-0.41702	0.0958463	-0.607116	0.00975115	-0.131041	0.616151	0.646027	0.00508438	-0.0726542	0.781696	0.19859	0.444808	-0.094243	0.719013	-0.329952	0.195876	0.0466394	0.858921	-0.345204	0.174762	0.235102	0.363699	-0.0929701	0.722666	0.0688673	0.792836	0.0846364	0.746722	-0.540679	0.0250302
ENSRNOG00000001049	Tpt1	116646	brown	0.585557	0.0135241	-0.461105	0.0624715	-0.348016	0.171044	-0.149629	0.566518	-0.398368	0.113242	-0.220838	0.394341	0.548432	0.022635	0.166202	0.523781	-0.180052	0.489245	0.182845	0.482416	-0.464969	0.0600248	0.213943	0.409638	-0.391172	0.120514	0.0983725	0.7072	-0.158667	0.543026	-0.00310141	0.990575	0.593093	0.0120931
ENSRNOG00000010490	Hes2	29567	brown	-0.557739	0.0199995	0.163145	0.531551	0.366111	0.148379	0.328562	0.19788	0.575591	0.0156181	-0.272186	0.290561	-0.529862	0.0286947	-0.440991	0.076415	0.52197	0.0316189	0.381462	0.130835	-0.0289256	0.91225	0.21954	0.397197	0.179585	0.490389	-0.133146	0.610446	0.0555517	0.832293	-0.159954	0.539716	-0.489026	0.0463587
ENSRNOG00000045595	Tnfsf9	353218	brown	-0.556594	0.0203101	0.187526	0.471076	0.244907	0.343435	0.203737	0.43285	0.368358	0.145715	-0.0912818	0.727521	-0.395015	0.116591	-0.140237	0.591382	0.278251	0.279515	0.367845	0.146321	0.242572	0.3482	-0.0749948	0.774831	0.284698	0.268057	0.063957	0.807336	0.197347	0.447721	-0.49318	0.0442592	-0.349086	0.169642
ENSRNOG00000019253	Bcar1	25414	brown	-0.543005	0.0242922	0.12775	0.625114	0.172217	0.508645	0.537516	0.026062	-0.0711648	0.786073	-0.265194	0.303618	0.432076	0.0832711	0.10782	0.680417	0.116281	0.65673	0.470419	0.0566951	0.52263	0.0313662	0.453073	0.0677924	-0.550576	0.0220054	0.652928	0.00448841	0.535476	0.0267448	-0.48411	0.0489395	0.507875	0.037404
ENSRNOG00000047576	LOC100911893	405969	brown	-0.54123	0.0248539	0.201108	0.438936	0.115382	0.659233	-0.00563507	0.982875	0.342153	0.17886	0.0453792	0.862699	-0.590849	0.012506	-0.111556	0.66992	0.128471	0.623145	-0.0860751	0.742553	-0.0733511	0.779651	-0.18833	0.469143	0.471058	0.0563141	-0.354039	0.163256	-0.0143379	0.956444	0.0843124	0.747662	-0.519731	0.0324889
ENSRNOG00000046261	Acp5	25732	brown	-0.539817	0.0253082	0.286381	0.265114	0.271967	0.290964	0.0136997	0.958381	0.504536	0.0388857	0.0731971	0.780102	-0.737501	0.000728315	-0.262184	0.309344	0.264516	0.304903	0.0380041	0.88486	0.148444	0.56963	-0.287005	0.264029	0.592656	0.0121726	-0.244713	0.343829	0.11473	0.661048	-0.155449	0.551339	-0.746027	0.00058427
ENSRNOG00000009078	Mrpl37	56281	brown	-0.535637	0.0266904	0.238716	0.356154	0.393363	0.118266	0.23752	0.358639	0.673038	0.00306618	-0.133367	0.609846	-0.687329	0.00229839	-0.386806	0.125081	0.52786	0.029416	0.307973	0.229136	-0.00317327	0.990356	0.0439903	0.866865	0.397479	0.114124	-0.203505	0.433385	-0.0103668	0.968501	-0.293307	0.253214	-0.668783	0.00333131
ENSRNOG00000006756	Maged1	84469	brown	-0.534958	0.0269203	-0.0354598	0.892525	0.108208	0.679324	0.235849	0.362131	0.343721	0.176746	0.128172	0.623963	-0.243474	0.346355	-0.0439941	0.866854	0.382716	0.129469	0.264315	0.305283	0.377411	0.135317	0.177418	0.495726	0.0233978	0.928975	0.241209	0.351001	0.364904	0.149823	-0.357705	0.158636	-0.510475	0.0362808
ENSRNOG00000020908	LOC303566	303566	brown	0.528533	0.0291721	-0.139012	0.594659	0.1015	0.698295	-0.00853643	0.974061	0.20303	0.434482	-0.0731996	0.780095	-0.0235066	0.928645	-0.278056	0.279866	0.275985	0.283612	0.0197201	0.940118	-0.416543	0.0962662	0.24805	0.33708	-0.114317	0.662201	-0.231627	0.371038	-0.463037	0.0612391	0.208068	0.422919	-0.00380357	0.988441
ENSRNOG00000051619	Asb2	299266	brown	-0.522054	0.0315868	0.252181	0.32883	0.0916545	0.726448	-0.137765	0.597999	0.276085	0.28343	0.170494	0.512959	-0.59531	0.0116959	-0.0187267	0.94313	-0.00757821	0.976972	-0.140311	0.591184	0.133013	0.610807	-0.435967	0.0802263	0.626439	0.00713116	-0.259485	0.314532	0.078913	0.763374	-0.0366917	0.888813	-0.61553	0.00852956
ENSRNOG00000001730	Acap2	619382	brown	-0.512044	0.0356152	0.607211	0.00973664	0.623177	0.00752839	0.683334	0.00249513	0.229287	0.376025	-0.741172	0.00066306	0.06674	0.79911	-0.424739	0.0892404	0.162812	0.5324	0.375973	0.136934	0.0654367	0.80296	0.389572	0.122174	-0.276186	0.283247	0.0255062	0.922592	-0.262792	0.308183	0.0935136	0.721106	0.612745	0.00891949
ENSRNOG00000007778	Alox15b	266604	brown	-0.511196	0.0359737	0.186267	0.474112	-0.0789796	0.76318	0.0597673	0.819756	-0.268731	0.29697	0.0762983	0.771015	0.0940248	0.719639	0.24784	0.337501	-0.323528	0.205249	-0.125532	0.631182	0.451802	0.0686645	-0.184026	0.479543	-0.00719959	0.978122	0.167661	0.52009	0.364145	0.150736	0.00686843	0.979128	0.142019	0.586629
ENSRNOG00000007036	Tgfbr1	29591	brown	0.506568	0.0379787	-0.177148	0.496394	-0.0520037	0.842875	0.13808	0.597156	-0.346709	0.172766	-0.209219	0.420298	0.637715	0.00588525	0.0166262	0.949501	-0.0602047	0.818457	0.221597	0.392675	0.0848253	0.746175	0.33107	0.194275	-0.607371	0.00971216	0.417439	0.0954793	0.158566	0.543287	-0.159702	0.540364	0.639696	0.00568582
ENSRNOG00000002339	Mark1	117016	brown	-0.506376	0.0380639	0.334533	0.189367	0.424888	0.0891165	0.126768	0.627797	0.678376	0.00275816	-0.125947	0.630043	-0.792801	0.000147169	-0.401645	0.110036	0.424669	0.0892986	0.231181	0.371985	-0.071961	0.783732	-0.17303	0.506616	0.610847	0.00919331	-0.352255	0.165538	-0.180696	0.487666	-0.214575	0.408223	-0.663152	0.00371057
ENSRNOG00000000053	Crp	25419	brown	0.504472	0.0389145	-0.236318	0.36115	-0.223071	0.389453	-0.149229	0.567568	-0.363289	0.15177	-0.0427604	0.870558	0.39828	0.113329	0.091186	0.727796	-0.199359	0.443012	-0.117153	0.654305	-0.278795	0.278537	0.104827	0.688865	-0.296661	0.247574	0.0309984	0.905987	-0.0565575	0.829298	0.237907	0.357834	0.397378	0.114224
ENSRNOG00000019606	Trpv3	497948	brown	-0.501029	0.0404892	0.429271	0.0855179	0.423875	0.0899629	0.61435	0.00869307	0.0497522	0.849603	-0.519538	0.0325648	0.27444	0.286426	-0.132848	0.611252	0.0991423	0.705005	0.45545	0.066184	0.350239	0.168142	0.35438	0.162823	-0.393551	0.118075	0.401503	0.110174	0.198928	0.444019	-0.337874	0.184711	0.662421	0.00376224
ENSRNOG00000002921	Akap4	79254	brown	-0.495794	0.0429753	0.437748	0.0788595	0.289688	0.259391	0.112403	0.66755	0.473467	0.0548944	0.136108	0.602451	-0.529567	0.0288001	-0.0533242	0.838933	0.130031	0.618896	-0.186899	0.472588	0.279193	0.277823	-0.206069	0.427487	0.479863	0.0512546	-0.182726	0.482705	-0.0347402	0.894695	0.0068907	0.97906	-0.443719	0.0744013
ENSRNOG00000022081	Ddi1	367012	brown	-0.49347	0.0441156	0.13741	0.598954	0.334027	0.190079	0.311377	0.223764	0.490909	0.0453978	-0.28843	0.261559	-0.552994	0.0213113	-0.492031	0.0448329	0.501216	0.0404023	0.393294	0.118337	-0.0554291	0.832658	0.170946	0.511826	0.16576	0.524899	-0.160813	0.537513	0.0846473	0.746691	-0.215633	0.40586	-0.538531	0.0257275
ENSRNOG00000016200	Lzic	366507	brown	0.493194	0.0442525	-0.421612	0.0918759	-0.149371	0.567194	0.0982139	0.707653	-0.266471	0.301207	-0.173661	0.505042	0.571354	0.0165822	0.0182627	0.944537	0.121033	0.643558	0.395493	0.11611	-0.168195	0.518741	0.443727	0.074396	-0.622438	0.00762086	0.356398	0.160273	0.0790483	0.762979	-0.287963	0.262367	0.525693	0.0302122
ENSRNOG00000019369	Slx1b	293489	brown	-0.487237	0.0472857	-0.030641	0.907066	0.260866	0.311872	0.330236	0.195468	0.473622	0.0548041	-0.257805	0.317789	-0.384897	0.127116	-0.410849	0.101375	0.552726	0.0213874	0.449825	0.0700364	-0.172069	0.509014	0.351159	0.16695	-0.00658814	0.97998	-0.109766	0.674941	-0.102582	0.695225	-0.128348	0.62348	-0.447958	0.0713509
[truncated: 8,433 more rows]

## Sheet: prefrontal cortex
Ensembl_Version	geneSymbol	LocusLinkID	moduleColor	GS.Factor	p.GS.Factor	MM.green	p.MM.green	MM.grey	p.MM.grey	MM.brown	p.MM.brown	MM.blue	p.MM.blue	MM.yellow	p.MM.yellow	MM.turquoise	p.MM.turquoise
[truncated: 9,532 more rows]
