# Supplementary material for: Genetic regulatory subnetworks and key regulating genes in rat hippocampus perturbed by prenatal malnutrition: implications for major brain disorders
Source: Aging (Albany NY). 2020 May 11;12(9):8434–58. doi: 10.18632/aging.103150 (PMC7244046; doi:10.18632/aging.103150)
Supplement: Supplementary Table 2 [file aging-12-103150-s004.xlsx]

## Sheet: Blue
gene	Module
Rps25	Blue
Rps14	Blue
Rps25	Blue
Ube2i	Blue
Rps23	Blue
Rps10	Blue
Tsc1	Blue
Rps3	Blue
Rps14	Blue
Rps10	Blue
Uqcrq	Blue
Rps12	Blue
Trappc1	Blue
Rps15	Blue
Rps27	Blue
Rps3	Blue
Rps3	Blue
Rps14	Blue
Rps12	Blue
Uba52	Blue
Tceb1	Blue
Rps15	Blue
Uba52	Blue
Rps27	Blue
Rps23	Blue
Rpl19	Blue
Rps14	Blue
Rps25	Blue
Rps10	Blue
Rps13	Blue
Rps14	Blue
Rps23	Blue
Ap2b1	Blue
Rps13	Blue
Rps25	Blue
Rps15	Blue
Rps10	Blue
Uba52	Blue
Rps10	Blue
Rps13	Blue
Uba52	Blue
Rps15	Blue
Rps10	Blue
Rps15	Blue
Rps10	Blue
Uba52	Blue
Rps14	Blue
Rps14	Blue
Uba52	Blue
Rplp1	Blue
Rpl36	Blue
Rps23	Blue
Os9	Blue
Rpl36	Blue
Cry2	Blue
Rps13	Blue
Polr1c	Blue
Rps13	Blue
Polr1c	Blue
Rps13	Blue
Rps13	Blue
Rps14	Blue
Fcf1	Blue
Rpl36	Blue
Insr	Blue
Wdr12	Blue
Rpl23	Blue
Rps10	Blue
Rps23	Blue
Rps12	Blue
Etf1	Blue
Rps13	Blue
Rps13	Blue
Polr1b	Blue
Etf1	Blue
Rpl14	Blue
Uqcrh	Blue
Coq7	Blue
Etf1	Blue
Sqle	Blue
mrpl11	Blue
Rps15	Blue
Rps15	Blue
Mrps22	Blue
Rps12	Blue
Pxn	Blue
Gpaa1	Blue
Rpl14	Blue
Uqcrq	Blue
Rps13	Blue
Uba52	Blue
mrpl11	Blue
Nox1	Blue
Rps24	Blue
Rpl19	Blue
Rpl36	Blue
Rps27	Blue
Rps24	Blue
Utp14a	Blue
Rps24	Blue
Uba52	Blue
Rpl36	Blue
Dlg4	Blue
Rps14	Blue
Etf1	Blue
Rps24	Blue
Rps24	Blue
Rps24	Blue
Rpl36a	Blue
Cdkn1b	Blue
Rps10	Blue
Rps4x	Blue
Rpl36a	Blue
LOC679683	Blue
Rxra	Blue
Dlg4	Blue
LOC679683	Blue
Rpl3	Blue
Rpl3	Blue
Tceb1	Blue
Cdk4	Blue
Ube2f	Blue
Rps4x	Blue
Etf1	Blue
Rpl36a	Blue
Rps10	Blue
LOC679683	Blue
Shank1	Blue
Cox4i1	Blue
Rpl3	Blue
Utp14a	Blue
Rps19	Blue
Eprs	Blue
Rps4x	Blue
Cs	Blue
Rpl14	Blue
Rps24	Blue
Rps27	Blue
Rpl14	Blue
Rpl3	Blue
Rpl36a	Blue
Hmgcs1	Blue
LOC679683	Blue
Rps4x	Blue
LOC684988	Blue
Rps3	Blue
Rps19	Blue
Mrps22	Blue
Rpl3	Blue
Gtf2h2	Blue
LOC679683	Blue
Hmgcs1	Blue
Rpl36a	Blue
Rps4x	Blue
Dlg4	Blue
Rpl14	Blue
Rpl36	Blue
Dlg4	Blue
Rps4x	Blue
Csnk1e	Blue
Rps24	Blue
Rps19	Blue
Rps3	Blue
Mrpl2	Blue
Rps25	Blue
Rps14	Blue
Rpl14	Blue
Rpl14	Blue
Rps15	Blue
Rps13	Blue
Rpl14	Blue
Cct2	Blue
Cyp51	Blue
Rplp1	Blue
Rpl14	Blue
Rps4x	Blue
Rps4x	Blue
Rps4x	Blue
Rpl14	Blue
Rpl3	Blue
Rxra	Blue
Rps29	Blue
Rpl3	Blue
Rps4x	Blue
Rpl3	Blue
Rpl36a	Blue
Rps14	Blue
Rps27	Blue
Rplp1	Blue
Ndufs5	Blue
Rps4x	Blue
Mrps22	Blue
Mrps26	Blue
Rpl3	Blue
Rpl14	Blue
Rps29	Blue
Rps24	Blue
Nrxn2	Blue
Rps27	Blue
Rps29	Blue
Rps15	Blue
Rps10	Blue
Rps14	Blue
Uba52	Blue
Polr2g	Blue
Vhl	Blue
Rpl35a	Blue
LOC684988	Blue
Ntrk2	Blue
Rps19	Blue
Kcnip3	Blue
LOC684988	Blue
LOC684988	Blue
Tceb1	Blue
Homer1	Blue
Rpl36a	Blue
Rps27	Blue
Rpl3	Blue
P4hb	Blue
Rps25	Blue
LOC679683	Blue
Rps3	Blue
Rpl36	Blue
Rpl3	Blue
Ikbkg	Blue
LOC684988	Blue
Mrps26	Blue
Rps10	Blue
Homer1	Blue
Shank3	Blue
Rps14	Blue
Rpl14	Blue
Cox7a2	Blue
Atp6v0d1	Blue
Shc1	Blue
Mrps22	Blue
Rps14	Blue
LOC679683	Blue
Rps29	Blue
Rps14	Blue
Rpl36a	Blue
Rab5b	Blue
Rps29	Blue
Eif4e	Blue
Polr2g	Blue
Taf9b	Blue
Rps19	Blue
Rps29	Blue
Rps4x	Blue
Eci2	Blue
Ddx39a	Blue
Fcgr3a	Blue
Rps12	Blue
Mrps26	Blue
Dlg4	Blue
Cacnb1	Blue
Carm1	Blue
Rps15	Blue
Rps19	Blue
Rpl36	Blue
Rps19	Blue
Wdr12	Blue
Rps19	Blue
Uqcrq	Blue
Rpl35a	Blue
Rps19	Blue
Rpl36a	Blue
LOC679683	Blue
Rps29	Blue
Rps25	Blue
Rps14	Blue
LOC684988	Blue
Psmc4	Blue
Rps13	Blue
Rpl36	Blue
Rpl35a	Blue
Csnk1e	Blue
Rps10	Blue
Cox7a2	Blue
Rps3	Blue
Ikbkg	Blue
Rps29	Blue
Rpl36a	Blue
Dlat	Blue
Dlg2	Blue
Rps15	Blue
Gorasp1	Blue
Rpl36	Blue
Rps25	Blue
Rab14	Blue
Rps10	Blue
Shank1	Blue
Rps4x	Blue
Shank2	Blue
Cdkn1b	Blue
Etf1	Blue
Rps10	Blue
Vti1a	Blue
Gtf2h2	Blue
Rps10	Blue
Rps25	Blue
Rpl36	Blue
Rpl9	Blue
Vti1a	Blue
Rps14	Blue
Chpt1	Blue
Kat8	Blue
Rps4x	Blue
P4hb	Blue
Rps29	Blue
Hmgcs1	Blue
Rpl9	Blue
Rpl36	Blue
Rpl35a	Blue
LOC684988	Blue
Rpl35a	Blue
Rab5b	Blue
Rpl9	Blue
Rps4x	Blue
Nlgn2	Blue
Rpl35a	Blue
Ugcg	Blue
Ddx39a	Blue
Shank2	Blue
Hmgcs1	Blue
Rpl36a	Blue
Rps29	Blue
Rpl36a	Blue
Rpl35a	Blue
Rps4x	Blue
Rps29	Blue
LOC684988	Blue
U2af1l4	Blue
Etf1	Blue
Rpl36	Blue
Sf3a2	Blue
Rims1	Blue
Rps4x	Blue
Rpl36	Blue
Rpl3	Blue
Rps29	Blue
Polr1c	Blue
Nup107	Blue
Coq4	Blue
Rps13	Blue
Gtf2h2	Blue
Rpl36	Blue
Rab11a	Blue
Rpl35a	Blue
Insr	Blue
Rps15	Blue
Rpl35a	Blue
Dlg2	Blue
Rps4x	Blue
Rab5b	Blue
Rps23	Blue
Timm23	Blue
Rps29	Blue
LOC679683	Blue
Mtfmt	Blue
LOC679683	Blue
LOC679683	Blue
Rpl36a	Blue
Eif2s2	Blue
Rpl35a	Blue
Utp14a	Blue
Rps23	Blue
Rps13	Blue
Dlg4	Blue
Tyrobp	Blue
Rpl36a	Blue
Ncbp1	Blue
Rps4x	Blue
Uqcrq	Blue
Gtf2h2	Blue
Rplp2	Blue
Utp14a	Blue
Rps15	Blue
Rxrb	Blue
Rpl35a	Blue
Paf1	Blue
Rxra	Blue
Rps4x	Blue
Mre11a	Blue
Rxrb	Blue
Coq3	Blue
Rpl36a	Blue
Rps25	Blue
Polr1b	Blue
Cul5	Blue
Rps23	Blue
Ftsj3	Blue
Fyttd1	Blue
Notch3	Blue
Rps29	Blue
Rpl35a	Blue
Apba1	Blue
Ndufs6	Blue
Dvl1	Blue
Ncbp1	Blue
Ncbp1	Blue
Arhgdia	Blue
Nme4	Blue
Irf3	Blue
Ndufs6	Blue
Gtf2h2	Blue
Rps25	Blue
Coq4	Blue
Rps10	Blue
Shc1	Blue
Drg1	Blue
Nos3	Blue
Pak1ip1	Blue
Rps2	Blue
LOC684988	Blue
Ppard	Blue
Dlg4	Blue
Rps12	Blue
LOC679683	Blue
Rpl24	Blue
Nlgn2	Blue
Rpl24	Blue
Rab8a	Blue
Ube2i	Blue
Fyttd1	Blue
Crtc1	Blue
Rps24	Blue
Ino80c	Blue
LOC679683	Blue
Rpl9	Blue
Rps14	Blue
Eif4h	Blue
Hnrpd	Blue
Ncbp1	Blue
Sqle	Blue
Sumo1	Blue
Ddx39a	Blue
Stub1	Blue
Gabrb3	Blue
Arhgef2	Blue
Rps19	Blue
Gtf2h2	Blue
LOC679683	Blue
Rpl35a	Blue
Rpl14	Blue
Ap2b1	Blue
Cox7a2	Blue
Xrcc1	Blue
Notch3	Blue
Shc1	Blue
Rps10	Blue
Rpl9	Blue
Hnrpd	Blue
Eif4e	Blue
Rpl9	Blue
Cbx7	Blue
Rpl14	Blue
Nsa2	Blue
Rps19	Blue
Cs	Blue
Dpm2	Blue
Snapc3	Blue
Psmc4	Blue
Nlgn2	Blue
Ube2i	Blue
LOC679683	Blue
Sdc3	Blue
Polr1c	Blue
Rps2	Blue
Rps3	Blue
Ndufs5	Blue
Coq4	Blue
Rps19	Blue
L3mbtl2	Blue
Rpl36a	Blue
Cox6b2	Blue
Btrc	Blue
Ftsj3	Blue
Sufu	Blue
Ap2b1	Blue
Rpl35a	Blue
Hnrpd	Blue
Creb1	Blue
Gpaa1	Blue
Rps12	Blue
Tbp	Blue
Rpl14	Blue
Ube2f	Blue
Rps25	Blue
Glrx2	Blue
Krt10	Blue
Kat8	Blue
Sumo1	Blue
Ndufs6	Blue
Cox6b2	Blue
Abi2	Blue
Shank2	Blue
Rhobtb2	Blue
Cox7a2	Blue
Wdr12	Blue
Ap2b1	Blue
LOC679683	Blue
Paf1	Blue
Gls	Blue
Fyttd1	Blue
Rpl35a	Blue
Rps4x	Blue
Rpl24	Blue
U2af1l4	Blue
Rpl3	Blue
Rps13	Blue
Rps19	Blue
Gmppa	Blue
Hnrpd	Blue
Rps10	Blue
Pes1	Blue
Paf1	Blue
Gfpt1	Blue
Rps24	Blue
Rps4x	Blue
LOC679683	Blue
Map2k7	Blue
Utp14a	Blue
Eif2s2	Blue
Hnrpd	Blue
Uimc1	Blue
Rps24	Blue
Gata3	Blue
Hnrpd	Blue
Ntrk2	Blue
Tceb1	Blue
Tyrobp	Blue
Ikbkg	Blue
Rps19	Blue
Nsa2	Blue
Tceb1	Blue
Txn2	Blue
LOC679683	Blue
Ube2i	Blue
Nme4	Blue
Sumo1	Blue
Rps12	Blue
Eif4h	Blue
Sepw1	Blue
Uba52	Blue
Ap2b1	Blue
Pip5k1c	Blue
Shank2	Blue
Gorasp1	Blue
Uimc1	Blue
Nqo1	Blue
Rab5b	Blue
Rps19	Blue
Hmgn1	Blue
Tmem147	Blue
Rab8a	Blue
Carm1	Blue
Btrc	Blue
Ak3	Blue
Ikbkg	Blue
Eif4h	Blue
Kif1b	Blue
Socs2	Blue
Rpl14	Blue
Nme3	Blue
Aldoart2	Blue
Cox7a2l2	Blue
Rpl14	Blue
Furin	Blue
Gmppa	Blue
Dlg4	Blue
Rxrb	Blue
Ncbp1	Blue
Cdk4	Blue
Gna13	Blue
Shc1	Blue
Rplp2	Blue
Tceb1	Blue
Rps14	Blue
Eif4h	Blue
Ncbp1	Blue
Rab14	Blue
Eif2s2	Blue
Rps4x	Blue
Rpl3	Blue
Ncbp1	Blue
Rps25	Blue
Arhgap9	Blue
Ncbp1	Blue
Nme3	Blue
Gata3	Blue
Uba52	Blue
Wdr12	Blue
Apba1	Blue
Tceb1	Blue
Rpl9	Blue
Rps13	Blue
Cx3cl1	Blue
Rps24	Blue
Rab14	Blue
Tceb1	Blue
Ube2i	Blue
Rps24	Blue
Arhgap20	Blue
Sumo1	Blue
F2r	Blue
Gpr17	Blue
Rps13	Blue
Tceb1	Blue
Gtf2h2	Blue
Ube2i	Blue
Dctpp1	Blue
Polr2g	Blue
Rps24	Blue
Hk2	Blue
Uqcrq	Blue
Ube2j2	Blue
Sumo1	Blue
Uqcrh	Blue
Ube2i	Blue
Eif4h	Blue
Cox4i1	Blue
Arih2	Blue
Tceb1	Blue
Arih2	Blue
Carm1	Blue
Srsf11	Blue
Rpl14	Blue
P4hb	Blue
U2af1l4	Blue
Rab5b	Blue
Ube2f	Blue
Ncbp1	Blue
Stub1	Blue
Rpl14	Blue
Ncbp1	Blue
Rps23	Blue
Ncl	Blue
Ube2f	Blue
Rps4x	Blue
Vgf	Blue
Srek1	Blue
Tceb1	Blue
Hadhb	Blue
Ube2i	Blue
Ndufaf3	Blue
Sumo1	Blue
Ncbp1	Blue
Utp14a	Blue
LOC679683	Blue
Rpl36	Blue
Ppard	Blue
Ncbp1	Blue
Sumo1	Blue
Cdk4	Blue
Gal	Blue
Stub1	Blue
Tceb1	Blue
Fyttd1	Blue
Taf9b	Blue
Stub1	Blue
Ikbkg	Blue
Etf1	Blue
U2af1l4	Blue
Ube2f	Blue
Cox7a2	Blue
Trappc1	Blue
Gtf2h2	Blue
Gata3	Blue
Btrc	Blue
Rab8a	Blue
Mpv17l	Blue
LOC679683	Blue
M6pr	Blue
Rab5b	Blue
Gstk1	Blue
Ncbp1	Blue
Srsf11	Blue
Polr2g	Blue
Taf9b	Blue
Ube2f	Blue
Cs	Blue
Ncbp1	Blue
LOC679683	Blue
Vwa1	Blue
Abi2	Blue
P4hb	Blue
Arfrp1	Blue
Ap2b1	Blue
Fyttd1	Blue
Fcgr3a	Blue
Rpl14	Blue
Btbd1	Blue
Rps24	Blue
Fyttd1	Blue
LOC679683	Blue
Gata3	Blue
Eci3	Blue
Stub1	Blue
Csf1	Blue
Rpl14	Blue
Pip4k2b	Blue
Tceb1	Blue
Rab5b	Blue
Kansl3	Blue
Cdkn1b	Blue
Hnrpd	Blue
Cct2	Blue
Tyrobp	Blue
Carm1	Blue
Ncl	Blue
Mvb12a	Blue
P4hb	Blue
Dvl1	Blue
Stub1	Blue
Rab5b	Blue
Srsf11	Blue
Dlat	Blue
F2r	Blue
Csnk1e	Blue
Ube4a	Blue
Gpr17	Blue
Rps24	Blue
LOC679683	Blue
Csnk1e	Blue
Rpl3	Blue
Crk	Blue
RGD1566137	Blue
Hmgn1	Blue
Rps29	Blue
Gtf2h2	Blue
Xrcc1	Blue
Ggh	Blue
Dcun1d3	Blue
U2af1l4	Blue
Insr	Blue
Ncbp1	Blue
Rps19	Blue
Polr2g	Blue
Decr2	Blue
Arih2	Blue
RT1-CE1	Blue
Ncbp1	Blue
Psmc4	Blue
Dab2ip	Blue
Isy1	Blue
Adcy5	Blue
Rpl9	Blue
Rabepk	Blue
Ncbp1	Blue
Gtf2h2	Blue
Ube2j2	Blue
Nme4	Blue
Uqcrq	Blue
Gpr17	Blue
Mxd3	Blue
Pigu	Blue
Ncbp1	Blue
Cx3cl1	Blue
Utp14a	Blue
Ube2f	Blue
Rpl3	Blue
Mxd3	Blue
Rab14	Blue
Pip5k1c	Blue
F2r	Blue
Tceb1	Blue
Casc3	Blue
U2af1l4	Blue
Vti1a	Blue
Rbfox2	Blue
Tceb1	Blue
Asah1	Blue
Ncbp1	Blue
Gtf2h2	Blue
M6pr	Blue
Hmgn1	Blue
Xrcc1	Blue
Btbd1	Blue
Dync1li2	Blue
Srsf11	Blue
Aldoart2	Blue
Arih2	Blue
Nudc	Blue
Btrc	Blue
Cbx6	Blue
Gemin6	Blue
Xrcc1	Blue
Zc3h8	Blue
Zc3h8	Blue
Srsf11	Blue
Srsf11	Blue
P4hb	Blue
Gtf2h2	Blue
Ube4a	Blue
Abi2	Blue
Fcgr3a	Blue
Vgf	Blue
Csnk1e	Blue
Srsf11	Blue
Polr2g	Blue
Tceb1	Blue
Casc3	Blue
Polr2g	Blue
Serpinb3	Blue
Ptges3l1	Blue
Btrc	Blue
Cbfb	Blue
Vti1a	Blue
Srsf11	Blue
Mpv17l	Blue
U2af1l4	Blue
Dync1li2	Blue
Tceb1	Blue
Ube2j2	Blue
Rpl24	Blue
Ube2f	Blue
Bambi	Blue
Pde1b	Blue
Btrc	Blue
Arih2	Blue
Arih2	Blue
Psmc4	Blue
Rps23	Blue
Elf2	Blue
RT1-CE1	Blue
Rps12	Blue
RT1-CE1	Blue
Shc1	Blue
Vgf	Blue
Casc3	Blue
Rpl24	Blue
Serpinb3	Blue
Dcun1d3	Blue
Rps23	Blue
Acd	Blue
Rab14	Blue
Arrb1	Blue
Trappc1	Blue
Tyrobp	Blue
Vhl	Blue
Np4	Blue
Dync1li2	Blue
Ube2j2	Blue
Csf1	Blue
Casc3	Blue
Serpinb3	Blue
Trappc1	Blue
Rab5b	Blue
Trappc1	Blue
Aldoart2	Blue
Nrn1	Blue
Cbx6	Blue
Ncbp1	Blue
LOC679683	Blue
Hmgn1	Blue
Casc3	Blue
Rps12	Blue
Rabepk	Blue
Insr	Blue
Hmgn1	Blue
Ptges3l1	Blue
Ube2j2	Blue
Rab5b	Blue
Aldoart2	Blue
Ncbp1	Blue
Arih2	Blue
Casc3	Blue
Np4	Blue
Rps13	Blue
Trappc1	Blue
Arrb1	Blue
Rbfox2	Blue
Btbd1	Blue
Mxd3	Blue
Gemin6	Blue
Sufu	Blue
Btbd1	Blue
Gpr17	Blue
Dctpp1	Blue
Rab5b	Blue
Decr2	Blue
Np4	Blue
Btbd1	Blue
Rab5b	Blue
Actn4	Blue
Ptges3l1	Blue
Arih2	Blue
LOC679683	Blue
Tceb1	Blue
Mxd3	Blue
Uqcrq	Blue
RT1-CE1	Blue
Fcgr3a	Blue
Rpl36	Blue
Rpl14	Blue
Rps10	Blue
Coq7	Blue
Uqcrq	Blue
Rpl24	Blue
Ntrk2	Blue
Rps19	Blue
Rpl24	Blue
LOC684988	Blue
Rpl3	Blue
Rps14	Blue
Homer1	Blue
Hmgcs1	Blue
Rpl36a	Blue
Rpl3	Blue
Rpl14	Blue
Rps19	Blue
Tyrobp	Blue
Rpl36a	Blue
Rpl24	Blue
Rps4x	Blue
Rpl14	Blue
Rps2	Blue
Utp14a	Blue
Yod1	Blue
Rps10	Blue
Rps19	Blue
Rpl3	Blue
Ndufs5	Blue
Eprs	Blue
F2r	Blue
Insr	Blue
Ndufs6	Blue
Rpl14	Blue
Rps19	Blue
Cs	Blue
Rplp2	Blue
Rplp2	Blue
Kcnj4	Blue
Rpl24	Blue
Rps24	Blue
Rpl3	Blue
Rplp2	Blue
Rpl3	Blue
Uba52	Blue
Rps19	Blue
Rps10	Blue
Taf9b	Blue
P4hb	Blue
Larp7	Blue
Yipf5	Blue
Rps19	Blue
Ssbp1	Blue
Rpl14	Blue
Dlg2	Blue
Cbfb	Blue
Cct2	Blue
Shank3	Blue
Cox7a2l2	Blue
Rpl24	Blue
Rps24	Blue
Rpl35a	Blue
Rpl24	Blue
Ednra	Blue
Dlg4	Blue
Rps13	Blue
Rpl3	Blue
Rpl3	Blue
Rps29	Blue
Crem	Blue
Rpl3	Blue
Rps4x	Blue
Rpl36	Blue
Rps19	Blue
Dars	Blue
Rpl24	Blue
Cdkn1b	Blue
Rpl24	Blue
Dlg4	Blue
Rps4x	Blue
Crem	Blue
LOC679683	Blue
Rps24	Blue
Gpx6	Blue
Ppard	Blue
Rplp2	Blue
Pcyox1	Blue
Rpl35a	Blue
Rpl3	Blue
Rpl36	Blue
Dlg4	Blue
Otud5	Blue
Dlat	Blue
Timm17a	Blue
Drap1	Blue
Plcg2	Blue
Rps19	Blue
Creb1	Blue
Rps15	Blue
Rps4x	Blue
Rps19	Blue
Rpl24	Blue
Adcy5	Blue
Uba52	Blue
AK6	Blue
Rps24	Blue
Rpl35a	Blue
Aurkaip1	Blue
Rplp2	Blue
Polr2g	Blue
Rpl24	Blue
Nme4	Blue
LOC679683	Blue
Rps4x	Blue
Sh2b1	Blue
Rps14	Blue
Rps10	Blue
Eprs	Blue
Cyp51	Blue
Rpl14	Blue
Ikbkg	Blue
Gga1	Blue
Uba52	Blue
Rps10	Blue
Prdx5	Blue
Gstm3	Blue
Rpl24	Blue
Rpl24	Blue
LOC679683	Blue
RGD1566137	Blue
Rpl24	Blue
Atp7b	Blue
Rplp2	Blue
Rplp2	Blue
Cs	Blue
Rpl24	Blue
Rpl24	Blue
Dlg4	Blue
Cs	Blue
Rpl3	Blue
Dlg2	Blue
Eif2s2	Blue
Rpl3	Blue
Rpl9	Blue
RGD1566137	Blue
RGD1566137	Blue
Polr1c	Blue
Dlat	Blue
Shank3	Blue
Gnas	Blue
Rpl24	Blue
RGD1566137	Blue
Rpl24	Blue
Mecp2	Blue
RGD1566137	Blue
Igf1r	Blue
RGD1566137	Blue
Rpl24	Blue
Os9	Blue
Crem	Blue
RGD1566137	Blue
Pak1ip1	Blue
LOC679683	Blue
Eif4e	Blue
Cox17	Blue
Rpl24	Blue
Ntrk2	Blue
Polr2g	Blue
Insr	Blue
RGD1566137	Blue
Rps24	Blue
Slc7a5	Blue
Rps13	Blue
Creb3l2	Blue
Cox7a2	Blue
Rps29	Blue
Tceb1	Blue
Ftsj3	Blue
Timm23	Blue
Rpl14	Blue
Rpl24	Blue
RGD1566137	Blue
Rpl14	Blue
Pdp2	Blue
RGD1566137	Blue
Ndufs6	Blue
Nme1	Blue
Rplp2	Blue
Cox17	Blue
Crem	Blue
Il33	Blue
Nme4	Blue
Dvl1	Blue
Hibch	Blue
Rps4x	Blue
Gmds	Blue
Atxn1	Blue
Zfp36l1	Blue
Rpl24	Blue
Kif13b	Blue
Mrpl2	Blue
Pak1ip1	Blue
Polr1b	Blue
Erbb4	Blue
Igf1r	Blue
Gna13	Blue
Rps10	Blue
Rps15	Blue
Gls	Blue
Nos3	Blue
LOC679683	Blue
Rps2	Blue
Ndufs6	Blue
Ube2i	Blue
Thra	Blue
Dazap1	Blue
Rplp2	Blue
Gstk1	Blue
Rps24	Blue
Eprs	Blue
Socs2	Blue
Scn4b	Blue
Eprs	Blue
Mrps22	Blue
Paics	Blue
Dyx1c1	Blue
Rxrb	Blue
Rps24	Blue
Utp14a	Blue
Gnas	Blue
Dpm2	Blue
Txn2	Blue
Gnas	Blue
Ikbkg	Blue
Rpl36	Blue
Gstm3	Blue
Sharpin	Blue
Cyp4f18	Blue
Gabrb3	Blue
Rpl3	Blue
Mrps26	Blue
Cntnap1	Blue
Nlgn2	Blue
Eprs	Blue
Rps13	Blue
Plcg2	Blue
Rplp2	Blue
Rbm39	Blue
Cox7a2l2	Blue
Uba52	Blue
Timm17al1	Blue
Eif4e	Blue
RGD1566137	Blue
LOC684988	Blue
Rplp2	Blue
Polr1b	Blue
Npr3	Blue
Rps14	Blue
LOC679683	Blue
Yod1	Blue
Rpl3	Blue
Mef2d	Blue
Hmgcs1	Blue
Polr1c	Blue
Igf1r	Blue
Prim1	Blue
Rnf113a1	Blue
Gpx6	Blue
Polr1b	Blue
RGD1566137	Blue
Polr2g	Blue
Pus1	Blue
Eprs	Blue
Slc2a13	Blue
Eif4e	Blue
Rpl24	Blue
Kcnd3	Blue
Gga1	Blue
Cbx6	Blue
Igf1r	Blue
Taf1a	Blue
Ndst1	Blue
Polr1c	Blue
Gata3	Blue
Polr1b	Blue
Uba52	Blue
Etf1	Blue
Sqle	Blue
Rpl36a	Blue
Timm8b	Blue
Grin1	Blue
RGD1566137	Blue
Cct2	Blue
Syngap1	Blue
Hibch	Blue
Ndufs6	Blue
Polr1b	Blue
Klf2	Blue
Pde1b	Blue
Cox4i1	Blue
Rpl36	Blue
Decr2	Blue
Dlg4	Blue
Srm	Blue
Wdr12	Blue
Rasd2	Blue
Grin1	Blue
Rps10	Blue
Rplp2	Blue
Mvb12a	Blue
Kat8	Blue
Ube2f	Blue
mrpl11	Blue
Rplp2	Blue
Gstm3	Blue
Rps19	Blue
Xrcc1	Blue
Etf1	Blue
Nos3	Blue
Eci2	Blue
Mrpl2	Blue
Slc12a5	Blue
Ube4a	Blue
Nqo1	Blue
Rpl24	Blue
Cdk4	Blue
Gpx6	Blue
Rps19	Blue
Rps4x	Blue
Prim1	Blue
Pip5k1c	Blue
Rps19	Blue
Homer1	Blue
Arrdc3	Blue
Tcea1	Blue
Slc36a1	Blue
Wdr12	Blue
Rps13	Blue
Slc12a5	Blue
LOC684988	Blue
Rpl3	Blue
Ank3	Blue
Rps29	Blue
Trpv1	Blue
Rps19	Blue
Rpl35a	Blue
Abi2	Blue
Slc1a4	Blue
Plcg2	Blue
Rps23	Blue
Thra	Blue
Timm17al1	Blue
Ndufs5	Blue
Gstm3	Blue
Nme4	Blue
Ece1	Blue
Nlgn2	Blue
Rnf113a1	Blue
Spi1	Blue
Gna13	Blue
Rpl3	Blue
Eprs	Blue
Rps14	Blue
LOC679683	Blue
Rps15	Blue
Cct2	Blue
Nsa2	Blue
Polr1c	Blue
Polr1b	Blue
Kat8	Blue
Polr1c	Blue
Kif1b	Blue
Ntrk2	Blue
Rps15	Blue
Ndufs5	Blue
Syngap1	Blue
Utp3	Blue
Chchd2	Blue
Rpl36	Blue
Ncoa2	Blue
Nrxn2	Blue
Nsa2	Blue
mrpl11	Blue
Pak1ip1	Blue
Eprs	Blue
Kat8	Blue
Ap2b1	Blue
Rpl9	Blue
Eif4e	Blue
LOC499136	Blue
Insr	Blue
Gata3	Blue
Syngap1	Blue
P4hb	Blue
Scamp5	Blue
Ptges3l1	Blue
Eprs	Blue
Tceb1	Blue
Ino80c	Blue
Rpl35a	Blue
Eprs	Blue
Selt	Blue
Tceb1	Blue
LOC499136	Blue
Eprs	Blue
Jmjd6	Blue
Rps15	Blue
Rpl3	Blue
Kat8	Blue
Dagla	Blue
Sel1l	Blue
Pelp1	Blue
Sel1l	Blue
Pelp1	Blue
Ndufs6	Blue
Nme3	Blue
Decr2	Blue
Uqcrh	Blue
Nqo1	Blue
Fst	Blue
Dlg4	Blue
Mrps22	Blue
Pde1b	Blue
Rps27	Blue
Rpl9	Blue
Cs	Blue
Eci3	Blue
Pak1ip1	Blue
Rps14	Blue
Paqr8	Blue
LOC679683	Blue
Gstm3	Blue
Dlat	Blue
Hmbs	Blue
RGD1305807	Blue
Trpv1	Blue
Bace1	Blue
P4hb	Blue
Dlg4	Blue
RGD1566137	Blue
Creb1	Blue
Igf1r	Blue
Ntrk2	Blue
Aldoart2	Blue
Stub1	Blue
Paics	Blue
Csf1	Blue
Dlg4	Blue
Rps4x	Blue
Etf1	Blue
Polr1c	Blue
Nme4	Blue
Plcg2	Blue
Zfp36l1	Blue
Notch3	Blue
Nos3	Blue
LOC499136	Blue
Pak1ip1	Blue
Aldoart2	Blue
Cox7a2	Blue
Mfsd8	Blue
Cox7a2l2	Blue
Cct2	Blue
Sepw1	Blue
Ets1	Blue
Eif4e	Blue
Eprs	Blue
P4hb	Blue
Rps13	Blue
Hap1	Blue
Sqle	Blue
Tef	Blue
Utp14a	Blue
Ftsj3	Blue
Tspan31	Blue
Drg1	Blue
RGD1566137	Blue
Tyrobp	Blue
Srsf11	Blue
Gsta1	Blue
Erbb4	Blue
Actn4	Blue
Tmem180	Blue
Polr1b	Blue
Nox1	Blue
Cx3cl1	Blue
Polr1b	Blue
Sel1l	Blue
Erbb4	Blue
Rnpep	Blue
Rpl3	Blue
Hmbs	Blue
Rps14	Blue
Tceb1	Blue
LOC679683	Blue
Bbs7	Blue
mrpl11	Blue
Mrpl2	Blue
Gcnt1	Blue
Ica1	Blue
Ap2b1	Blue
Rpl24	Blue
LOC499136	Blue
Cdkn1b	Blue
Arf3	Blue
Paics	Blue
Dlg2	Blue
Pus1	Blue
Rps15	Blue
Nsa2	Blue
Cyb5r4	Blue
Mtpn	Blue
Cox7a2	Blue
Eprs	Blue
Cs	Blue
Cox6b2	Blue
Gpx6	Blue
Rexo4	Blue
Timm23	Blue
Polr2g	Blue
Cox17	Blue
Txn1	Blue
Zfp639	Blue
Aurkaip1	Blue
Cand2	Blue
Ccdc71	Blue
Wars	Blue
Grin1	Blue
Eif4h	Blue
Hmgcs1	Blue
Rps3	Blue
Naglt1	Blue
Rpl9	Blue
Rpl14	Blue
Os9	Blue
Tspan31	Blue
Trnau1ap	Blue
Shc1	Blue
Rps29	Blue
F2r	Blue
Cbx6	Blue
RGD1566137	Blue
Tor3a	Blue
Prim1	Blue
Rps15	Blue
Rps29	Blue
Carm1	Blue
Rab11a	Blue
Srek1	Blue
Cox17	Blue
Shank3	Blue
Actn4	Blue
Homer1	Blue
Cox6c	Blue
Sema6c	Blue
Srsf11	Blue
Rsrc2	Blue
Polr1b	Blue
Ncln	Blue
Rpl24	Blue
Adcy5	Blue
Rps29	Blue
LOC499136	Blue
Cox7a2	Blue
Nsa2	Blue
LOC684988	Blue
Xrcc1	Blue
Pes1	Blue
Btf3	Blue
Ppib	Blue
Gpaa1	Blue
Polr1c	Blue
Vstm4	Blue
Pde1b	Blue
Gabrb3	Blue
Slc38a7	Blue
Utp14a	Blue
Polr1b	Blue
Eprs	Blue
RGD1566137	Blue
Trappc1	Blue
Plec	Blue
Erbb4	Blue
Timm17al1	Blue
Rpl24	Blue
Adcy5	Blue
Nme4	Blue
Fcgr3a	Blue
Rpl24	Blue
Kcnq2	Blue
Prim1	Blue
Psmc4	Blue
Prim1	Blue
Csrp2	Blue
Tmem126a	Blue
Uqcrq	Blue
Ppib	Blue
Rps29	Blue
Nme4	Blue
Nme3	Blue
Polr1c	Blue
Adcy5	Blue
Txn2	Blue
Nme1	Blue
Adarb2	Blue
Eif2s2	Blue
Mrpl2	Blue
RGD1566137	Blue
Wdr45b	Blue
Polr2g	Blue
Rbm39	Blue
rCG_37337	Blue
Nme4	Blue
Ank3	Blue
Dlg2	Blue
Wdr12	Blue
Pafah2	Blue
Shank1	Blue
Adcy6	Blue
Ntrk2	Blue
Txn2	Blue
Adcy5	Blue
Adcy5	Blue
Nme3	Blue
Gas7	Blue
Igfbp5	Blue
Cct2	Blue
Srek1	Blue
Csf1	Blue
LOC684988	Blue
Rps4x	Blue
Rps13	Blue
LOC679683	Blue
mrpl11	Blue
Rps14	Blue
mrpl11	Blue
Rpl3	Blue
Rps19	Blue
Cs	Blue
Adcy5	Blue
Slc2a3	Blue
Rpl24	Blue
Polr2g	Blue
Zdhhc5	Blue
Gmppa	Blue
Rps3	Blue
Eprs	Blue
Yipf5	Blue
Sf3a2	Blue
Cox7a2	Blue
Utp14a	Blue
Rab8a	Blue
Rpl3	Blue
Pak1ip1	Blue
Adcy5	Blue
Rpl36	Blue
Tef	Blue
Adcy6	Blue
Rps14	Blue
Rps24	Blue
Sumo1	Blue
Rps24	Blue
Rps23	Blue
Spi1	Blue
Chchd2	Blue
Selt	Blue
Cyhr1	Blue
Rasgrp1	Blue
Rbfox2	Blue
Rps4x	Blue
Myoz3	Blue
Shank2	Blue
Uqcrq	Blue
Blcap	Blue
Rims4	Blue
Insr	Blue
Nrxn2	Blue
Cct2	Blue
Timm8b	Blue
LOC684988	Blue
Igf1r	Blue
Ntrk2	Blue
Cntnap1	Blue
Eif2s2	Blue
Rab11a	Blue
Zfand3	Blue
Bola1	Blue
Bbs7	Blue
Arf3	Blue
Eif4e	Blue
Rpl24	Blue
Hibch	Blue
Ntrk2	Blue
Rpl35a	Blue
Tbce	Blue
Insr	Blue
Rps14	Blue
Trnau1ap	Blue
Adar	Blue
S100a1	Blue
Sf3a2	Blue
Rpl36	Blue
Csf1	Blue
Ntrk2	Blue
Rps3	Blue
Rps14	Blue
Rpl24	Blue
Uimc1	Blue
Gfpt1	Blue
Gorasp1	Blue
Dnpep	Blue
Slc2a13	Blue
Timm17a	Blue
Tef	Blue
Slc2a13	Blue
Rpl36	Blue
Syngap1	Blue
Cx3cl1	Blue
Dlg4	Blue
Rexo4	Blue
Nubp2	Blue
LOC679683	Blue
Rpl24	Blue
Rps14	Blue
Pip5k1c	Blue
Ppig	Blue
Gpx6	Blue
Ndufs5	Blue
Pcyox1	Blue
Tnr	Blue
Shank3	Blue
Caskin1	Blue
Pxn	Blue
Zfand3	Blue
Wdr45b	Blue
Homer1	Blue
Polr1c	Blue
Rbm39	Blue
Rps4x	Blue
Rpl14	Blue
Etf1	Blue
Timm8b	Blue
Polr1b	Blue
Cntnap1	Blue
Pus1	Blue
Rps14	Blue
Rexo4	Blue
LOC679683	Blue
Dazap1	Blue
Epn1	Blue
Rpl3	Blue
Cox17	Blue
Rpl24	Blue
Sel1l	Blue
Mrpl2	Blue
Utp14a	Blue
Mutyh	Blue
Rnf40	Blue
Rps3	Blue
Cct2	Blue
Cs	Blue
Rps4x	Blue
Rps4x	Blue
Bace1	Blue
Ppib	Blue
Hibch	Blue
Eprs	Blue
Rps14	Blue
Rasgrp1	Blue
Qrsl1	Blue
Rps24	Blue
LOC679683	Blue
Gabbr2	Blue
Ndufs6	Blue
Slc2a13	Blue
Cct2	Blue
Gabbr2	Blue
Coq7	Blue
Rps25	Blue
Cul5	Blue
Trnau1ap	Blue
Rpl36a	Blue
Tmem126a	Blue
Etf1	Blue
Fkbp11	Blue
Ddx39a	Blue
Sema6b	Blue
LOC684988	Blue
Rps14	Blue
Rps13	Blue
Polr1c	Blue
Bambi	Blue
Rps24	Blue
Hp	Blue
Eprs	Blue
Srsf11	Blue
Vti1a	Blue
Dlat	Blue
Carm1	Blue
Lysmd3	Blue
Uqcrh	Blue
Ndufs6	Blue
Trpv1	Blue
Ppp1r14b	Blue
Dlg4	Blue
Trnau1ap	Blue
MGC95210	Blue
Mecp2	Blue
Eprs	Blue
Homer1	Blue
LOC294154	Blue
Pofut1	Blue
Kcnq2	Blue
Uba52	Blue
Rpl3	Blue
Uba52	Blue
Lphn1	Blue
Kif1b	Blue
Polr1b	Blue
Polr1c	Blue
Kcnip3	Blue
mrpl11	Blue
Rps24	Blue
Rpl3	Blue
Mxd3	Blue
Caskin1	Blue
Nox1	Blue
Rpl24	Blue
Etf1	Blue
Clstn3	Blue
Naglt1	Blue
Lifr	Blue
Ndufs6	Blue
Dync1li2	Blue
Pip5k1c	Blue
Hmbs	Blue
Grin1	Blue
Insr	Blue
Abcc8	Blue
Insr	Blue
Utp14a	Blue
Mtpn	Blue
Gnas	Blue
Ank3	Blue
Mrpl2	Blue
Slc23a2	Blue
Rplp2	Blue
Ncbp1	Blue
Grpel1	Blue
Tyrobp	Blue
Cd79b	Blue
Slc6a1	Blue
Eprs	Blue
Ugcg	Blue
Rpl36	Blue
Golga2	Blue
Arrdc3	Blue
Srm	Blue
Il4r	Blue
Cnot10	Blue
Gna13	Blue
Gtf2h2	Blue
Akr7a2	Blue
Vhl	Blue
LOC679683	Blue
Atg9a	Blue
Rps14	Blue
Pus1	Blue
Dlg4	Blue
Drg1	Blue
Rps24	Blue
Smarca2	Blue
Arrb1	Blue
Arrb1	Blue
Crtc1	Blue
Arrb1	Blue
Arrb1	Blue
Olr745	Blue
F2r	Blue
Arrb1	Blue
Olr1126	Blue
Olr670	Blue
Cct2	Blue
Actn4	Blue
Arrb1	Blue
Il11ra1	Blue
Olr1163	Blue
Olr1536	Blue
Olr1076	Blue
Arrb1	Blue
Olr349	Blue
Trpv1	Blue
Rnf40	Blue
Grm5	Blue
Ap2b1	Blue
Dlg2	Blue
Gabbr2	Blue
Rbfox2	Blue
Kpna5	Blue
Cyp51	Blue
Dlat	Blue
Tmem180	Blue
Utp14a	Blue
Nsa2	Blue
Il18	Blue
Cox4i1	Blue
Ednra	Blue
Dlg4	Blue
Srek1	Blue
Crtc1	Blue
Nlgn2	Blue
Grin1	Blue
Rpl14	Blue
Ftsj3	Blue
Slc25a38	Blue
Cct2	Blue
Etf1	Blue
Cbfb	Blue
Aif1	Blue
Vti1a	Blue
Rpl14	Blue
Sct	Blue
Etf1	Blue
Blcap	Blue
Zdhhc20	Blue
Uqcrq	Blue
Rps13	Blue
Uxs1	Blue
RGD1306730	Blue
Gata3	Blue
Cct2	Blue
Cox4i1	Blue
Pes1	Blue
Endog	Blue
Rbm39	Blue
Ndufs6	Blue
Os9	Blue
Os9	Blue
Polr1c	Blue
MGC95210	Blue
U2af1l4	Blue
Timm23	Blue
Nrn1	Blue
Slc12a5	Blue
Spi1	Blue
Dlg4	Blue
Pigy	Blue
LOC679683	Blue
Tmem132d	Blue
Prrc1	Blue
Dhrs7b	Blue
Rps14	Blue
Eprs	Blue
MGC114529	Blue
Srek1	Blue
Rcan3	Blue
Eif2s2	Blue
Mlec	Blue
Rps13	Blue
Eprs	Blue
Gfpt1	Blue
LOC684988	Blue
Pcyox1	Blue
RGD1566137	Blue
Ap2b1	Blue
Grip2	Blue
Timm17a	Blue
Gas7	Blue
Decr2	Blue
Btf3	Blue
LOC499136	Blue
Cct2	Blue
Ap2b1	Blue
Rps10	Blue
Timm23	Blue
LOC499136	Blue
Trnau1ap	Blue
LOC499136	Blue
Tomm40l	Blue
Dclk1	Blue
Paics	Blue
Slc38a7	Blue
Eprs	Blue
Ikbkg	Blue
Gabarapl2	Blue
Uqcrh	Blue
Pak1ip1	Blue
Dlg4	Blue
Rpl36a	Blue
Kcnq2	Blue
Rps24	Blue
Selt	Blue
LOC499136	Blue
Slc2a3	Blue
Fgf22	Blue
Dnajc16	Blue
Fxr1	Blue
Arih2	Blue
Utp14a	Blue
Psmc4	Blue
Rps4x	Blue
Myrip	Blue
Slc7a5	Blue
Grin1	Blue
Gls	Blue
Txn2	Blue
Scn2b	Blue
Ikbkg	Blue
Uxs1	Blue
Kcnj4	Blue
LOC294154	Blue
Eprs	Blue
Gas7	Blue
LOC499136	Blue
Tceb1	Blue
Uqcrq	Blue
Dnpep	Blue
Pak1ip1	Blue
Rps4x	Blue
Rpl35a	Blue
Rnf113a1	Blue
Ublcp1	Blue
Hibch	Blue
Pip5k1c	Blue
Arhgdia	Blue
LOC499136	Blue
Pdp2	Blue
Rps19	Blue
LOC499136	Blue
Polr1b	Blue
Prim1	Blue
Eif5	Blue
Map2k5	Blue
Blcap	Blue
Rps13	Blue
Nrxn2	Blue
Cct2	Blue
Adarb2	Blue
Cct2	Blue
Pak1ip1	Blue
Cntnap1	Blue
Hadhb	Blue
Prom1	Blue
Gpx6	Blue
Dpm2	Blue
Paics	Blue
Timm23	Blue
Gstm5	Blue
Nox1	Blue
Golga2	Blue
Irf3	Blue
Tuba1c	Blue
Utp14a	Blue
Kcnq2	Blue
Gabrb3	Blue
Cmbl	Blue
Fcf1	Blue
Dlg4	Blue
Polr1c	Blue
Rps10	Blue
Ablim2	Blue
Anxa5	Blue
Tyrobp	Blue
Csf1	Blue
Rab5b	Blue
Fyttd1	Blue
Ube2i	Blue
Eprs	Blue
Rpl36a	Blue
Mrpl2	Blue
Cox17	Blue
Map4	Blue
Mrpl44	Blue
Slc2a3	Blue
Uba52	Blue
Chchd2	Blue
Polr1b	Blue
Prpf38b	Blue
Rps25	Blue
Etf1	Blue
Timm23	Blue
Rpl35a	Blue
Dlg4	Blue
Shank2	Blue
Egr3	Blue
Fxr1	Blue
Wdr89	Blue
Dlg2	Blue
Rpl3	Blue
Ablim2	Blue
LOC684988	Blue
Gabrb3	Blue
Deaf1	Blue
Rps10	Blue
Dcun1d3	Blue
Tada2a	Blue
Glrx2	Blue
Rps19	Blue
Zbtb38	Blue
Rexo4	Blue
mrpl11	Blue
RGD1566137	Blue
Slc12a5	Blue
Srek1	Blue
[truncated: 4,489 more rows]

## Sheet: Pink
gene	Module
Rps8	Pink
Gucy1b3	Pink
Tacr2	Pink
Sf3a3	Pink
Ass1	Pink
Drd2	Pink
Chst10	Pink
Epn2	Pink
Rbm22	Pink
Kcnab1	Pink
Gng7	Pink
Kcnab1	Pink
Rbx1	Pink
Kcnq3	Pink
Pcyt1b	Pink
Rbm22	Pink
Grin2a	Pink
Rbx1	Pink
Fbxo17	Pink
Drd2	Pink
B3gat1	Pink
Sf3a3	Pink
Rps8	Pink
Gnb3	Pink
Eps15l1	Pink
Drd2	Pink
Epas1	Pink
Fbxo17	Pink
Rab13	Pink
Dhx8	Pink
Gpc1	Pink
Cdh13	Pink
Epas1	Pink
Rab40c	Pink
Htr1d	Pink
Adcy8	Pink
Rbx1	Pink
Epb41l3	Pink
Cep70	Pink
Srsf6	Pink
Rbx1	Pink
Pqbp1	Pink
Pqbp1	Pink
Epn2	Pink
Dgat1	Pink
Gnb3	Pink
Tacr2	Pink
Rab40c	Pink
Pqbp1	Pink
Gnb3	Pink
Rbm22	Pink
Rbm22	Pink
Rbx1	Pink
Wsb1	Pink
Slco4c1	Pink
Fbxo17	Pink
Fbxo17	Pink
Atad3a	Pink
Rnf25	Pink
Rnf25	Pink
Rbx1	Pink
Slco4c1	Pink
Mpnd	Pink
Plekhg5	Pink
Chst12	Pink
Atf4	Pink
Hgs	Pink
Aspdh	Pink
Gng7	Pink
Pcyt1b	Pink
Slc8a2	Pink
Aspdh	Pink
Nrxn3	Pink
Sdad1	Pink
Cir1	Pink
Gng7	Pink
Dgat1	Pink
Gng7	Pink
Drd2	Pink
Chst15	Pink
Ptpn23	Pink
Dhx8	Pink
Slc8a2	Pink
Ufd1l	Pink
Pcgf6	Pink
Dhx8	Pink
Gphn	Pink
Dgat1	Pink
Nefl	Pink
Atad3a	Pink
Gphn	Pink
Rock1	Pink
Map3k11	Pink
Ptpn23	Pink
Mpnd	Pink
Grin2a	Pink
Gpr141	Pink
Ric8b	Pink
Chst12	Pink
Acp2	Pink
Atf4	Pink
Gclc	Pink
Pvalb	Pink
Stxbp5	Pink
Chst12	Pink
Mpdz	Pink
Gfm1	Pink
Gnb3	Pink
Gnb3	Pink
Gfm1	Pink
Drd2	Pink
Grk6	Pink
Gpr139	Pink
Penk	Pink
Aqp4	Pink
Cant1	Pink
Gng7	Pink
Grk1	Pink
Ddx21	Pink
Gucy1b3	Pink
Pcsk1	Pink
Gucy1a3	Pink
Dhx8	Pink
Pvalb	Pink
Pvalb	Pink
Sdad1	Pink
Stxbp5	Pink
Gucy1b3	Pink
Camk1	Pink
Pvalb	Pink
Aspdh	Pink
Rgs14	Pink
Gucy1a3	Pink
Drd2	Pink
Gfm1	Pink
Nefl	Pink
Dyrk1a	Pink
Kcnq3	Pink
Gnb3	Pink
Cacna1h	Pink
Drd2	Pink
Ddx21	Pink
Fabp3	Pink
Gorasp2	Pink
Gng7	Pink
Sdad1	Pink
Gng7	Pink
Gng7	Pink
Olr1091	Pink
Olr297	Pink
Olr1250	Pink
Gng7	Pink
Itih3	Pink
Drd2	Pink
Nr1i3	Pink
Rps8	Pink
Ptpn23	Pink
Fam203a	Pink
Dhx8	Pink
Gphn	Pink
Rps8	Pink
Sdad1	Pink
Pex5l	Pink
Ufd1l	Pink
Tbcb	Pink
Guca2a	Pink
Ufd1l	Pink
Ufd1l	Pink
Grk1	Pink
Guca2a	Pink
Ddx21	Pink
Ptpn23	Pink
ZH14	Pink
Pvalb	Pink
Grin2a	Pink
Mcart1	Pink
Gphn	Pink
Dhx8	Pink
Aqp4	Pink
Pvalb	Pink
Dgat1	Pink
Rasgrp2	Pink
Fam203a	Pink
Gpr153	Pink
Gfm1	Pink
Gfm1	Pink
Stx3	Pink
B3gat1	Pink
Rin1	Pink
Gfm1	Pink
Rab13	Pink
Rab13	Pink
Ufd1l	Pink
Fam203a	Pink
Pvalb	Pink
Tmub2	Pink
Acp2	Pink
Epas1	Pink
Epn2	Pink
Acy1	Pink
Gnb3	Pink
Rock1	Pink
B3gat1	Pink
Kcnq3	Pink
Chst15	Pink
Rnd2	Pink
Grk1	Pink
Psmd1	Pink
Psmd1	Pink
Oas1k	Pink
Isyna1	Pink
Ddx21	Pink
Gar1	Pink
Ddx21	Pink
Ncdn	Pink
ENSRNOG00000013082	Pink
Ubqln1	Pink
Cep70	Pink
Grin2a	Pink
Crybb1	Pink
Thop1	Pink
Gap43	Pink
Gnmt	Pink
Grina	Pink
Hgs	Pink
Oas1k	Pink
Hgs	Pink
Fubp1	Pink
Pvalb	Pink
Oas1k	Pink
Hyal5	Pink
Rps8	Pink
Rps8	Pink
Mpnd	Pink
Mpnd	Pink
Mpnd	Pink
Sqstm1	Pink
Fam203a	Pink
Dyrk1a	Pink
Exoc8	Pink
Grk6	Pink
Atf4	Pink
Scn8a	Pink
Ubqln1	Pink
Gucy1a3	Pink
Grin2a	Pink
Tmub2	Pink
Hgs	Pink
Tm4sf4	Pink
Rock1	Pink
ENSRNOG00000013082	Pink
Lrrc4	Pink
Pvalb	Pink
Dpp6	Pink
Stxbp5	Pink
B3gat1	Pink
Gng7	Pink
Slc7a3	Pink
Rbm22	Pink
Slco4c1	Pink
Olr1250	Pink
Sh2b3	Pink
Nap1l5	Pink
Grin2a	Pink
Kcnt2	Pink
Gpr139	Pink
Pvalb	Pink
Ubqln1	Pink
Atf4	Pink
Aqp4	Pink
Hsp90ab1	Pink
Sdad1	Pink
Mpdz	Pink
Olfm3	Pink
Ubqln1	Pink
Dhx8	Pink
Spon1	Pink
Stx3	Pink
Grin2a	Pink
Tnnc2	Pink
Pvalb	Pink
Gpc1	Pink
Ddx21	Pink
Acy1	Pink
Ndufs1	Pink
Ufd1l	Pink
Ubqln1	Pink
Acy1	Pink
Sh3kbp1	Pink
Sh3kbp1	Pink
Oas1k	Pink
Dhx8	Pink
Chfr	Pink
Oas1k	Pink
Rnf25	Pink
Chfr	Pink
Ufd1l	Pink
Dhx8	Pink
Pvalb	Pink
Tacr2	Pink
Rab13	Pink
Prl4a1	Pink
Cdh13	Pink
Drd2	Pink
Rgs14	Pink
Clcn4	Pink
Amt	Pink
Dgat1	Pink
Dusp6	Pink
Ddx21	Pink
Nt5c3b	Pink
Ddx21	Pink
Fhl1	Pink
Tmub2	Pink
Zdhhc14	Pink
Gfm1	Pink
Gpr139	Pink
Ercc3	Pink
Ercc3	Pink
Kcnq3	Pink
Hgs	Pink
Clec2d2	Pink
Drd2	Pink
Grin2a	Pink
Map6	Pink
Car5b	Pink
Gpr85	Pink
Mpnd	Pink
Rpl35	Pink
Gucy1a3	Pink
Tac1	Pink
Phf5a	Pink
Asns	Pink
Penk	Pink
B3gat1	Pink
Eps15l1	Pink
Phf5a	Pink
Kcnc2	Pink
Gnb3	Pink
Kcnc3	Pink
Wsb1	Pink
Kcnab1	Pink
Chkb	Pink
Sf3a3	Pink
Nefl	Pink
Fbxo2	Pink
Fbxo2	Pink
Gnb3	Pink
B4galt3	Pink
Srsf6	Pink
Ddx47	Pink
Htr1d	Pink
Sh3kbp1	Pink
Htr1d	Pink
Rbx1	Pink
Rbx1	Pink
Rab4b	Pink
Rbm22	Pink
B3gat1	Pink
Cdh7	Pink
Psmd1	Pink
Rab4b	Pink
Penk	Pink
Adcy3	Pink
Ercc3	Pink
Nlgn3	Pink
Tuba1a	Pink
Phf5a	Pink
Psmd1	Pink
Phf5a	Pink
Sf3a3	Pink
Sh3kbp1	Pink
Hmox2	Pink
Penk	Pink
Gnb3	Pink
Rab13	Pink
Srsf6	Pink
Tac1	Pink
Srsf6	Pink
Pqbp1	Pink
Rnf25	Pink
Fbxo2	Pink
Hmox2	Pink
Wsb1	Pink
Rnf25	Pink
Rab4b	Pink
Fbxo2	Pink
Wsb1	Pink
Prl4a1	Pink
Dgat1	Pink
Psmd1	Pink
Mpdz	Pink
Chst7	Pink
Asns	Pink
Eps15l1	Pink
Ass1	Pink
Adcy3	Pink
Mapk9	Pink
Slc8a1	Pink
Asns	Pink
Nlgn3	Pink
Ddx47	Pink
Nkap	Pink
Olr1730	Pink
Agpat1	Pink
Htr1d	Pink
Gng7	Pink
Chst7	Pink
Hgs	Pink
Phf5a	Pink
Slc24a2	Pink
Rbx1	Pink
Bre	Pink
Srsf6	Pink
Nlgn3	Pink
Lpl	Pink
Gap43	Pink
Gfm1	Pink
Pvalb	Pink
Add2	Pink
Rab13	Pink
Rbm22	Pink
Bre	Pink
Adcy8	Pink
Gpr139	Pink
Adcy3	Pink
Mief1	Pink
Acy1	Pink
Camk1	Pink
Hmox2	Pink
Grin2a	Pink
Stx3	Pink
Chst15	Pink
Trpc5	Pink
Rbm22	Pink
Adcy3	Pink
Adcy8	Pink
Rpl35	Pink
Rgs9	Pink
Drd2	Pink
Gpr153	Pink
Tac1	Pink
S100b	Pink
Nt5c3b	Pink
Adcy8	Pink
Gnb3	Pink
Dhx8	Pink
Adcy8	Pink
Nkx6-1	Pink
Adcy8	Pink
Ddx47	Pink
Kcnc2	Pink
Nrg1	Pink
Nap1l5	Pink
Exoc8	Pink
Adcy3	Pink
Ppm1e	Pink
S100b	Pink
Acy1	Pink
Ric8b	Pink
Adcy3	Pink
Tac1	Pink
Phf5a	Pink
S100b	Pink
Grin2a	Pink
Scn8a	Pink
Mapk9	Pink
Rasgrp2	Pink
Grin2a	Pink
Ddx47	Pink
Lpl	Pink
Magi3	Pink
Mapk9	Pink
Rps8	Pink
Olr1646	Pink
Olr41	Pink
Gng7	Pink
Gng7	Pink
Gng7	Pink
Olr1072	Pink
Tm4sf4	Pink
Sh3kbp1	Pink
Chst10	Pink
Psmd1	Pink
Capn7	Pink
Sdad1	Pink
Sf3a3	Pink
Ubqln1	Pink
Gar1	Pink
Gar1	Pink
Adhfe1	Pink
Atad1	Pink
Tuba1a	Pink
Adcy8	Pink
Ubqln1	Pink
Chfr	Pink
Rgs9	Pink
Adcy3	Pink
Sdad1	Pink
Sh3kbp1	Pink
Tuba1a	Pink
Nlgn3	Pink
Nlgn3	Pink
Slc25a18	Pink
Grin2a	Pink
Sdad1	Pink
Dpp6	Pink
Drd2	Pink
Fabp3	Pink
Rnd2	Pink
Ddx47	Pink
Olr1730	Pink
Stx3	Pink
Rps8	Pink
Sytl5	Pink
Chst7	Pink
Sh3kbp1	Pink
Ndufs1	Pink
Sytl5	Pink
Tbc1d20	Pink
Dgcr14	Pink
Asns	Pink
Tnnc2	Pink
Sf3a3	Pink
Ttc1	Pink
Flcn	Pink
Tuba1a	Pink
Ddx47	Pink
Rgs9	Pink
Rnd2	Pink
Nell2	Pink
Pvalb	Pink
Chst10	Pink
Myo9a	Pink
Rab13	Pink
Oas1b	Pink
Oas1f	Pink
Psmd1	Pink
Ercc3	Pink
Rps8	Pink
Ddx47	Pink
Gar1	Pink
Fbxo2	Pink
Thop1	Pink
Psmd1	Pink
B4galt3	Pink
Olfm3	Pink
Rbm22	Pink
Lnpep	Pink
S100b	Pink
Hpd	Pink
Rapgef5	Pink
Oas1f	Pink
Hgs	Pink
Oas1b	Pink
Sf3a3	Pink
Gap43	Pink
Rps8	Pink
Pla2g2d	Pink
Oas1b	Pink
Oas1f	Pink
Oas1b	Pink
Oas1k	Pink
Oas1f	Pink
Psmd1	Pink
Atad3a	Pink
Srsf6	Pink
Rab13	Pink
Gnb3	Pink
Hmox2	Pink
Kcnc2	Pink
Fbxo2	Pink
Gap43	Pink
Slc30a3	Pink
Ercc3	Pink
Epn2	Pink
Gkn1	Pink
Thoc1	Pink
Slco4c1	Pink
Dscam	Pink
Scn8a	Pink
Kcnc3	Pink
Nrg1	Pink
Sh3kbp1	Pink
Rgs9	Pink
Adcy3	Pink
Ddx47	Pink
Lnpep	Pink
Add2	Pink
Naa25	Pink
Phyhipl	Pink
Nrg1	Pink
Kcnc2	Pink
Adcy3	Pink
Kcnc3	Pink
Ttc1	Pink
Mapk9	Pink
Pvalb	Pink
Tuba1a	Pink
Rpl35	Pink
Magi3	Pink
Nap1l5	Pink
Rbx1	Pink
Gfm1	Pink
Kcnc3	Pink
Exoc8	Pink
Gap43	Pink
Myo9a	Pink
Myo9a	Pink
Fubp1	Pink
Fam203a	Pink
Ass1	Pink
Surf1	Pink
Sh3kbp1	Pink
Hgs	Pink
Ttc1	Pink
Oas1b	Pink
Oas1f	Pink
Sh3kbp1	Pink
Ddx25	Pink
Oas1b	Pink
Chfr	Pink
Car8	Pink
Oas1f	Pink
Mpnd	Pink
Thoc1	Pink
Tac1	Pink
Chkb	Pink
Arf2	Pink
Gjb3	Pink
Chfr	Pink
Adcy8	Pink
Gfra2	Pink
Mid1	Pink
Ass1	Pink
Slc30a3	Pink
Mapk9	Pink
Rbm22	Pink
B3gat1	Pink
Gfm1	Pink
Rnf25	Pink
Nap1l5	Pink
Dgat1	Pink
Sf3a3	Pink
Htr1d	Pink
Zfp238	Pink
Sf3a3	Pink
Dpp6	Pink
Ttc1	Pink
Arf2	Pink
Thop1	Pink
Slc25a18	Pink
Rfx3	Pink
Mid1	Pink
Gap43	Pink
Ubqln1	Pink

## Sheet: Salmon
gene	Module
Rps15a	Salmon
Vamp2	Salmon
Rps15a	Salmon
Rps6	Salmon
Mrpl46	Salmon
Psma1	Salmon
Slc17a7	Salmon
Src	Salmon
Dlgap1	Salmon
Unc13a	Salmon
Slc17a7	Salmon
Rps15a	Salmon
Vamp2	Salmon
Vamp2	Salmon
Nos1	Salmon
Syt1	Salmon
Nsmaf	Salmon
Rpl41	Salmon
Chrm1	Salmon
Fbxl16	Salmon
Oxt	Salmon
Nfkbib	Salmon
Sstr5	Salmon
Agtr2	Salmon
Rnps1	Salmon
Rnps1	Salmon
Sptbn2	Salmon
Rnps1	Salmon
Fbxl16	Salmon
Cyba	Salmon
Bet1	Salmon
Oxt	Salmon
Sptbn2	Salmon
Rpl41	Salmon
Nos1	Salmon
Sh3rf1	Salmon
Agtr2	Salmon
Acadm	Salmon
Syt1	Salmon
ENSRNOG00000042929	Salmon
Nos1	Salmon
Gpx4	Salmon
Unc13a	Salmon
Kpna3	Salmon
Vamp2	Salmon
Bsn	Salmon
Bsn	Salmon
Nos1	Salmon
Rps6	Salmon
Src	Salmon
Ppara	Salmon
Nos1	Salmon
Selk	Salmon
Slc17a7	Salmon
Syt1	Salmon
Syt1	Salmon
Unc13a	Salmon
Vamp2	Salmon
Rps15a	Salmon
Erc1	Salmon
Mrps15	Salmon
Selk	Salmon
Slc17a7	Salmon
Vamp2	Salmon
Dnm1	Salmon
Nos1ap	Salmon
Kcnj8	Salmon
Syt1	Salmon
Slc17a7	Salmon
Hsd17b12	Salmon
Foxp1	Salmon
Iqsec3	Salmon
Ppara	Salmon
Dlgap1	Salmon
ENSRNOG00000046891	Salmon
Psma1	Salmon
Vamp2	Salmon
Dnm1	Salmon
Nolc1	Salmon
Smad3	Salmon
Grin2b	Salmon
Psma1	Salmon
Bsn	Salmon
Vamp2	Salmon
Zdhhc8	Salmon
ENSRNOG00000046891	Salmon
Cyba	Salmon
Syt1	Salmon
Slc17a7	Salmon
Rtn3	Salmon
Mrps15	Salmon
Rps15a	Salmon
Bsn	Salmon
Vamp2	Salmon
Zdhhc8	Salmon
Dnm1	Salmon
Syt1	Salmon
Bsn	Salmon
Nos1	Salmon
Nos1ap	Salmon
Slc17a7	Salmon
Rps15a	Salmon
Nudt2	Salmon
Nos1	Salmon
Chrm1	Salmon
Cacna1c	Salmon
Syt1	Salmon
Fbxl16	Salmon
Jph4	Salmon
Agtr2	Salmon
Nos1	Salmon
Nudt2	Salmon
Irx5	Salmon
Surf2	Salmon
Dnm1	Salmon
Grin2b	Salmon
Mmp16	Salmon
H2afy	Salmon
Bsn	Salmon
Nos1ap	Salmon
Chmp5	Salmon
Slc17a7	Salmon
Slc17a7	Salmon
Bsn	Salmon
Bsn	Salmon
Zdhhc23	Salmon
Rps6	Salmon
Syt1	Salmon
Rps27a	Salmon
Rps27a	Salmon
Mrps15	Salmon
Psmb8	Salmon
Syt1	Salmon
Grin2b	Salmon
Grin2b	Salmon
Unc13c	Salmon
Vamp2	Salmon
Eif3h	Salmon
Bet1	Salmon
Dnm1	Salmon
Nos1ap	Salmon
Dnm1	Salmon
Smpd3	Salmon
Rps15a	Salmon
Gna11	Salmon
Trim9	Salmon
Chrm1	Salmon
Psmb8	Salmon
Cnr1	Salmon
Cnr1	Salmon
Sarnp	Salmon
Syf2	Salmon
Sptb	Salmon
Rps15a	Salmon
Sh3rf1	Salmon
Kcnab2	Salmon
Sptb	Salmon
Gna11	Salmon
Bet1	Salmon
Rnps1	Salmon
Grin2b	Salmon
Trim9	Salmon
Sstr5	Salmon
Hibadh	Salmon
Unc13a	Salmon
Nos1ap	Salmon
Cacna1c	Salmon
Txnrd2	Salmon
Erc1	Salmon
Kpna4	Salmon
Unc13a	Salmon
Unc13a	Salmon
Erc1	Salmon
Dmd	Salmon
Eif3h	Salmon
Cacna1c	Salmon
Acadm	Salmon
ENSRNOG00000042929	Salmon
Txnrd2	Salmon
Grin2b	Salmon
Erc1	Salmon
Cacna1b	Salmon
Doc2b	Salmon
Doc2b	Salmon
Mrps15	Salmon
Unc13c	Salmon
Rps6	Salmon
Gpx4	Salmon
Bsn	Salmon
Vapa	Salmon
Src	Salmon
Zdhhc23	Salmon
Cacna1c	Salmon
Bsn	Salmon
Unc13a	Salmon
Hibadh	Salmon
Grin2b	Salmon
Erc1	Salmon
Cnr1	Salmon
Trim9	Salmon
Pfkfb3	Salmon
Nsmaf	Salmon
Bsn	Salmon
Bsn	Salmon
Lsg1	Salmon
Src	Salmon
Doc2b	Salmon
Eif3h	Salmon
Jph4	Salmon
Erc1	Salmon
2019-09-05	Salmon
Src	Salmon
Src	Salmon
Unc13c	Salmon
Sstr5	Salmon
Vapa	Salmon
Eif3h	Salmon
Npm1	Salmon
Grin2b	Salmon
Trim9	Salmon
Txnrd2	Salmon
2019-09-05	Salmon
Lppr2	Salmon
Prkar2a	Salmon
Cyba	Salmon
Dmd	Salmon
Chrm1	Salmon
Nudt2	Salmon
Rps6	Salmon
Src	Salmon
Cacna1b	Salmon
Cacna1b	Salmon
Grin2b	Salmon
Unc13a	Salmon
Dlgap1	Salmon
Nos1	Salmon
Sptb	Salmon
Rps27a	Salmon
Pbx2	Salmon
Mrpl46	Salmon
Apaf1	Salmon
Cnr1	Salmon
Src	Salmon
Rps27a	Salmon
Dlgap1	Salmon
Trim9	Salmon
Unc13c	Salmon
Nos1	Salmon
Erc1	Salmon
Unc13c	Salmon
Cacna1b	Salmon
Pou3f4	Salmon
