# Supplementary material for: Genetic regulatory subnetworks and key regulating genes in rat hippocampus perturbed by prenatal malnutrition: implications for major brain disorders
Source: Aging (Albany NY). 2020 May 11;12(9):8434–58. doi: 10.18632/aging.103150 (PMC7244046; doi:10.18632/aging.103150)
Supplement: Supplementary Table 3 [file aging-12-103150-s005.xlsx]

## Sheet: Blue
	ID	Type	Description	GeneRatio	BgRatio	pvalue	p.adjust	qvalue	geneID	Count
GO:0050808	GO:0050808	BP	synapse organization	48/767	470/17943	2.16449e-08	0.000107099	9.80399e-05	Grm5/Amigo1/Gabrb3/Dlgap3/Shank2/Insr/Shank3/Nptxr/Synpo/Kirrel3/Tsc2/Grin1/Chrnb2/Adgrl1/Vhl/Mecp2/Gabra1/Lhfpl4/Grip2/Dlg4/Syngap1/Clstn3/Homer1/F2r/Abhd17b/Nlgn2/Taok2/Syn1/Tsc1/Dab2ip/Cacnb1/Shank1/Cntn2/Rims4/Amigo2/Dvl1/Igf1r/Ank3/Tnr/Sncg/Ncan/Chchd10/Srcin1/Dlg2/Ntrk2/Abi2/Nrxn2/Erbb4	48
GO:0051705	GO:0051705	BP	multi-organism behavior	16/767	82/17943	3.16519e-07	0.000783069	0.000716833	Shank2/Shank3/Atxn1/Kirrel3/Tsc2/Grin1/Chrnb2/Mecp2/Dlg4/Grpr/Gls/Nlgn2/Shank1/Dvl1/Sncg/Nrxn2	16
GO:0007612	GO:0007612	BP	learning	24/767	179/17943	6.8597e-07	0.00113139	0.00103569	Grm5/Fosl1/Creb1/Shank2/Shank3/Atxn1/Synpo/Grin1/Chrnb2/Pde1b/Mecp2/Slc12a5/Cacna1e/Syngap1/Sct/Shank1/Cntn2/Tnr/Map1a/Ntrk2/Slc6a1/Abcc8/Deaf1/Nrxn2	24
GO:0035176	GO:0035176	BP	social behavior	13/767	60/17943	1.15526e-06	0.00114324	0.00104654	Shank2/Shank3/Atxn1/Tsc2/Grin1/Chrnb2/Mecp2/Dlg4/Grpr/Nlgn2/Shank1/Dvl1/Nrxn2	13
GO:0051703	GO:0051703	BP	intraspecies interaction between organisms	13/767	60/17943	1.15526e-06	0.00114324	0.00104654	Shank2/Shank3/Atxn1/Tsc2/Grin1/Chrnb2/Mecp2/Dlg4/Grpr/Nlgn2/Shank1/Dvl1/Nrxn2	13
GO:0048169	GO:0048169	BP	regulation of long-term neuronal synaptic plasticity	10/767	38/17943	3.05661e-06	0.00208027	0.00190431	Grm5/Rab8a/Shank3/Synpo/Kcnj10/Grin1/Dlg4/Syngap1/Rab11a/Rims1	10
GO:0050890	GO:0050890	BP	cognition	35/767	351/17943	3.07488e-06	0.00208027	0.00190431	Grm5/Dgcr2/Fosl1/Creb1/Adora1/Il18/Shank2/Shank3/Atxn1/Synpo/Dnaaf4/Grin1/Chrnb2/Pde1b/Mecp2/Slc12a5/Cacna1e/Gnas/Syngap1/Crtc1/Grpr/Sct/Fam107a/Shank1/Cntn2/Thra/Slc1a4/Tnr/Map1a/Ntrk2/Slc6a1/Abcc8/Abi2/Deaf1/Nrxn2	35
GO:0099565	GO:0099565	BP	chemical synaptic transmission, postsynaptic	18/767	120/17943	3.36341e-06	0.00208027	0.00190431	Gabrb3/Cx3cl1/Adora1/Shank2/Shank3/Trpv1/Atxn1/Grin1/Chrnb2/Mecp2/Begain/Grip2/Dlg4/Nlgn2/Shank1/Dvl1/Abat/Rims1	18
GO:0022613	GO:0022613	BP	ribonucleoprotein complex biogenesis	41/767	452/17943	4.94381e-06	0.00253108	0.00231699	Rps23/Rps25/Rps24/mrpl11/Rpl14/Rps14/LOC100911847/Nsa2/Rps27/Rpl35al1/Rpl35a/Rps19/Eif5/Rps10/Rpl24/Utp14a/Utp3/Gemin6/Rexo4/Wdr12/G3bp2/Ptges3l1/Sf3a2/Ncl/Eif2s2/Tsc1/Rps15/Pes1/Rpl10a/Adar/Rrp15/Pak1ip1/Isy1/Fcf1/Psip1/Rpl3/Ncbp1/Mtrex/Eif4h/Ftsj3/Rps2	41
GO:0043954	GO:0043954	BP	cellular component maintenance	13/767	68/17943	5.11537e-06	0.00253108	0.00231699	Shank2/Insr/Shank3/Grin1/Shroom2/Dlg4/Syngap1/Homer1/F2r/Abhd17b/Igf1r/Chchd10/Dlg2	13
GO:0060078	GO:0060078	BP	regulation of postsynaptic membrane potential	20/767	155/17943	1.03108e-05	0.00463799	0.00424569	Grm5/Gabrb3/Cx3cl1/Adora1/Shank2/Shank3/Trpv1/Atxn1/Grin1/Chrnb2/Mecp2/Begain/Gabra1/Grip2/Dlg4/Nlgn2/Shank1/Dvl1/Abat/Rims1	20
GO:0035418	GO:0035418	BP	protein localization to synapse	14/767	86/17943	1.57172e-05	0.00648072	0.00593255	Rab8a/Nptxr/Grin1/Grip2/Dlg4/Clstn3/Homer1/Abhd17b/Nlgn2/Shank1/Rab11a/Dlg2/Map1a/Nrxn2	14
GO:0034614	GO:0034614	BP	cellular response to reactive oxygen species	23/767	201/17943	1.72341e-05	0.00655957	0.00600473	Nqo1/Mff/Il18/Mpv17/Rnf112/Pxn/Klf2/Txn1/Ncf1/Glrx2/Hnrnpd/Rps3/Pdk2/Nos3/Ets1/Crk/Fbxo7/Sirpa/Prdx5/Ccs/Nfe2l2/Trpc6/Endog	23
GO:2000463	GO:2000463	BP	positive regulation of excitatory postsynaptic potential	9/767	37/17943	1.92379e-05	0.00679924	0.00622413	Shank2/Shank3/Grin1/Grip2/Dlg4/Nlgn2/Shank1/Dvl1/Rims1	9
GO:1901653	GO:1901653	BP	cellular response to peptide	38/767	432/17943	2.18166e-05	0.00719657	0.00658785	Grm5/Atp5pd/Rpl23/Nucks1/Rab8a/Adcy6/Creb1/Anxa5/Il18/Gfpt1/Insr/Insig1/Akap1/Pxn/Arhgef2/Tsc2/Asl/Klf2/Trarg1/Socs2/Ogt/Bace1/Max/Pdk2/Tsc1/Cacnb1/Bcl2l2/Nos3/Crk/Shc1/Rxra/Igf1r/Zfp36l1/Nfe2l2/Adipor1/Cdk4/Gdf15/Eprs	38
GO:0042254	GO:0042254	BP	ribosome biogenesis	29/767	293/17943	2.44492e-05	0.00723525	0.00662326	Rps25/Rps24/mrpl11/Rpl14/Rps14/LOC100911847/Nsa2/Rps27/Rpl35al1/Rpl35a/Rps19/Rps10/Rpl24/Utp14a/Utp3/Rexo4/Wdr12/Ncl/Tsc1/Rps15/Pes1/Rpl10a/Rrp15/Pak1ip1/Fcf1/Rpl3/Mtrex/Ftsj3/Rps2	29
GO:0048015	GO:0048015	BP	phosphatidylinositol-mediated signaling	20/767	165/17943	2.6144e-05	0.00723525	0.00662326	Grm5/Plcg2/Il18/Rasgrp1/Insr/Ppard/Tsc2/Ncf1/Ogt/F2r/Ncs1/Dab2ip/Gab2/Igf1r/Zfp36l1/Gata3/Ntrk2/Pdgfa/Npr3/Erbb4	20
GO:0000302	GO:0000302	BP	response to reactive oxygen species	29/767	295/17943	2.77437e-05	0.00723525	0.00662326	Fosl1/Nqo1/Mff/Il18/Mpv17/Nptxr/Rnf112/Pxn/Klf2/Txn1/Ncf1/Glrx2/Hp/Hnrnpd/Rps3/Pdk2/Nos3/Ets1/Crk/Shc1/Fbxo7/Sirpa/Prdx5/Ccs/Nfe2l2/Erbb4/Trpc6/Nox1/Endog	29
GO:0046051	GO:0046051	BP	UTP metabolic process	5/767	10/17943	2.96735e-05	0.00723525	0.00662326	Nme1/Decr2/Nme4/Ak3/Nme3	5
GO:0048017	GO:0048017	BP	inositol lipid-mediated signaling	20/767	167/17943	3.11692e-05	0.00723525	0.00662326	Grm5/Plcg2/Il18/Rasgrp1/Insr/Ppard/Tsc2/Ncf1/Ogt/F2r/Ncs1/Dab2ip/Gab2/Igf1r/Zfp36l1/Gata3/Ntrk2/Pdgfa/Npr3/Erbb4	20
GO:0008542	GO:0008542	BP	visual learning	12/767	69/17943	3.19691e-05	0.00723525	0.00662326	Creb1/Atxn1/Synpo/Grin1/Chrnb2/Pde1b/Mecp2/Cacna1e/Syngap1/Sct/Abcc8/Deaf1	12
GO:0061136	GO:0061136	BP	regulation of proteasomal protein catabolic process	21/767	181/17943	3.21697e-05	0.00723525	0.00662326	Os9/Btrc/Il33/Yod1/Atxn3/Dnaaf4/Arih1/Psmc4/Bbs7/Ogt/Sumo1/Rnf40/Dab2ip/Csnk1e/Dvl1/Rnf144a/Arih2/Stub1/Gabarapl2/Map1a/Uchl5	21
GO:0007611	GO:0007611	BP	learning or memory	30/767	314/17943	3.4835e-05	0.00749407	0.00686018	Grm5/Fosl1/Creb1/Il18/Shank2/Shank3/Atxn1/Synpo/Dnaaf4/Grin1/Chrnb2/Pde1b/Mecp2/Slc12a5/Cacna1e/Syngap1/Crtc1/Grpr/Sct/Shank1/Cntn2/Thra/Tnr/Map1a/Ntrk2/Slc6a1/Abcc8/Abi2/Deaf1/Nrxn2	30
GO:1903050	GO:1903050	BP	regulation of proteolysis involved in cellular protein catabolic process	23/767	213/17943	4.3565e-05	0.00898164	0.00822193	Os9/Rpl23/Btrc/Il33/Yod1/Atxn3/Dnaaf4/Arih1/Psmc4/Sufu/Bbs7/Ogt/Sumo1/Rnf40/Dab2ip/Csnk1e/Dvl1/Rnf144a/Arih2/Stub1/Gabarapl2/Map1a/Uchl5	23
GO:0007632	GO:0007632	BP	visual behavior	12/767	72/17943	4.95496e-05	0.00980685	0.00897734	Creb1/Atxn1/Synpo/Grin1/Chrnb2/Pde1b/Mecp2/Cacna1e/Syngap1/Sct/Abcc8/Deaf1	12
GO:0008306	GO:0008306	BP	associative learning	15/767	109/17943	6.10207e-05	0.0116127	0.0106304	Creb1/Atxn1/Synpo/Grin1/Chrnb2/Pde1b/Mecp2/Cacna1e/Syngap1/Sct/Shank1/Tnr/Map1a/Abcc8/Deaf1	15
GO:0060079	GO:0060079	BP	excitatory postsynaptic potential	15/767	111/17943	7.54834e-05	0.013598	0.0124478	Adora1/Shank2/Shank3/Trpv1/Atxn1/Grin1/Chrnb2/Mecp2/Begain/Grip2/Dlg4/Nlgn2/Shank1/Dvl1/Rims1	15
GO:0002181	GO:0002181	BP	cytoplasmic translation	17/767	137/17943	7.69492e-05	0.013598	0.0124478	Rps23/Rpl35al1/Rpl9/Eif5/Rpl24/Rps29/LOC108352650/Zc3h15/Drg1/Eif2s2/Rpl10a/Etf1/Rplp1/Rpl36/Rpl19/Eif4h/Rps2	17
GO:0048168	GO:0048168	BP	regulation of neuronal synaptic plasticity	12/767	78/17943	0.000110813	0.018907	0.0173077	Grm5/Rab8a/Shank3/Synpo/Kcnj10/Grin1/Dlg4/Syngap1/Vgf/Cntn2/Rab11a/Rims1	12
GO:0007416	GO:0007416	BP	synapse assembly	20/767	184/17943	0.000122927	0.0202748	0.0185598	Amigo1/Gabrb3/Shank2/Shank3/Nptxr/Kirrel3/Grin1/Chrnb2/Adgrl1/Mecp2/Gabra1/Lhfpl4/Clstn3/Nlgn2/Shank1/Amigo2/Dvl1/Ntrk2/Nrxn2/Erbb4	20
GO:0016072	GO:0016072	BP	rRNA metabolic process	22/767	214/17943	0.000131304	0.0209579	0.0191851	Rps24/Rpl14/Rps14/LOC100911847/Nsa2/Rps27/Rpl35a/Spin1/NEWGENE_1306210/Utp14a/Utp3/Rexo4/Polr1b/Wdr12/Ncl/Rps15/Pes1/Rpl10a/Rrp15/Fcf1/Mtrex/Ftsj3	22
GO:1903362	GO:1903362	BP	regulation of cellular protein catabolic process	24/767	245/17943	0.000140519	0.0217277	0.0198899	Os9/Rpl23/Furin/Btrc/Il33/Yod1/Atxn3/Dnaaf4/Arih1/Psmc4/Sufu/Bbs7/Ogt/Sumo1/Rnf40/Dab2ip/Csnk1e/Dvl1/Rnf144a/Arih2/Stub1/Gabarapl2/Map1a/Uchl5	24
GO:0098754	GO:0098754	BP	detoxification	15/767	118/17943	0.000152331	0.0228404	0.0209084	Gstm5/Gstm3/Nqo1/Txn1/Gstk1/Mt1/Gpx6/Hp/Selenow/Alox5ap/Nos3/Prdx5/Ccs/Nfe2l2/Selenot	15
GO:0000028	GO:0000028	BP	ribosomal small subunit assembly	8/767	38/17943	0.000167963	0.0240613	0.0220261	Rps25/Rps14/LOC100911847/Rps27/Rps19/Rps10/Rps15/Rps2	8
GO:0007005	GO:0007005	BP	mitochondrion organization	37/767	460/17943	0.000178605	0.0240613	0.0220261	Ndufs6/Atg9a/Atf2/Bloc1s2/Ssbp1/Cox17/Apopt1/Mff/Coq7/Fmc1/Wdr45b/Mpv17/Hk2/Tmem135/Sharpin/Chchd2/Grpel1/Fam162a/Ndufb4/Ogt/Ndufs5/Hap1/Timm23/LOC100362432/Maip1/Tfam/Timm17a/Bcl2l2/Tomm40l/Fastkd3/Cox7a2/Fbxo7/Chchd10/Them4/Gabarapl2/Ndufaf3/Erbb4	37
GO:1990748	GO:1990748	BP	cellular detoxification	14/767	107/17943	0.000184088	0.0240613	0.0220261	Gstm5/Gstm3/Nqo1/Txn1/Gstk1/Gpx6/Hp/Selenow/Alox5ap/Nos3/Prdx5/Ccs/Nfe2l2/Selenot	14
GO:0009147	GO:0009147	BP	pyrimidine nucleoside triphosphate metabolic process	6/767	21/17943	0.000186965	0.0240613	0.0220261	Nme1/Decr2/Nme4/Ak3/Dctpp1/Nme3	6
GO:0007626	GO:0007626	BP	locomotory behavior	24/767	250/17943	0.0001912	0.0240613	0.0220261	Grm5/Tbce/Abhd12/Shank3/Ncoa2/Atxn1/Kcnj10/Grin1/Chrnb2/Pde1b/Mecp2/Asl/Adcy5/Cacna1e/Dlg4/Nlgn2/Tsc1/Cntn2/Apba1/Tnr/Sncg/Rasd2/Abat/Arrdc3	24
GO:0034599	GO:0034599	BP	cellular response to oxidative stress	29/767	329/17943	0.000193206	0.0240613	0.0220261	Aif1/Nqo1/Mff/Il18/Coq7/Mpv17/Rnf112/Pxn/Klf2/Txn1/Ncf1/Glrx2/Hnrnpd/P4hb/Rps3/Pdk2/Tsc1/Nos3/Ets1/Crk/Fbxo7/Sirpa/Prdx5/Ccs/Nfe2l2/Trpc6/Pycr2/Nox1/Endog	29
GO:0099173	GO:0099173	BP	postsynapse organization	21/767	205/17943	0.000194514	0.0240613	0.0220261	Shank2/Insr/Shank3/Nptxr/Tsc2/Grin1/Vhl/Lhfpl4/Grip2/Dlg4/Syngap1/Homer1/Abhd17b/Nlgn2/Shank1/Dvl1/Igf1r/Srcin1/Dlg2/Abi2/Nrxn2	21
GO:0099084	GO:0099084	BP	postsynaptic specialization organization	9/767	49/17943	0.000200732	0.0242249	0.0221758	Shank2/Shank3/Nptxr/Dlg4/Syngap1/Nlgn2/Shank1/Dlg2/Nrxn2	9
GO:0031644	GO:0031644	BP	regulation of neurological system process	19/767	177/17943	0.000211873	0.0249606	0.0228493	Adora1/Shank2/Shank3/Nptxr/Kcnj10/Grin1/Begain/Grip2/Dlg4/Homer1/F2r/Nlgn2/Shank1/Nos3/Fcgr3a/Dvl1/Tnr/Abat/Rims1	19
GO:0016358	GO:0016358	BP	dendrite development	27/767	301/17943	0.000239725	0.0270611	0.0247721	Carm1/Shank2/Shank3/Tsc2/Grin1/Chrnb2/Gorasp1/Mecp2/Slc12a5/Dlg4/Syngap1/Crtc1/Ss18l1/Nlgn2/Taok2/Dab2ip/Shank1/Crk/Dvl1/Srcin1/Map1a/Ntrk2/Dclk1/Rbfox2/Tmem106b/Abi2/Trpc6	27
GO:0006364	GO:0006364	BP	rRNA processing	19/767	179/17943	0.000245028	0.0270611	0.0247721	Rps24/Rpl14/Rps14/LOC100911847/Nsa2/Rps27/Rpl35a/Utp14a/Utp3/Rexo4/Wdr12/Ncl/Rps15/Pes1/Rpl10a/Rrp15/Fcf1/Mtrex/Ftsj3	19
GO:0099558	GO:0099558	BP	maintenance of synapse structure	6/767	22/17943	0.000247838	0.0270611	0.0247721	Shank2/Shank3/Dlg4/Syngap1/Chchd10/Dlg2	6
GO:0042542	GO:0042542	BP	response to hydrogen peroxide	20/767	194/17943	0.000251578	0.0270611	0.0247721	Fosl1/Nqo1/Mff/Il18/Nptxr/Rnf112/Klf2/Txn1/Glrx2/Hp/Rps3/Ets1/Crk/Shc1/Fbxo7/Sirpa/Nfe2l2/Erbb4/Trpc6/Endog	20
GO:0034660	GO:0034660	BP	ncRNA metabolic process	36/767	452/17943	0.000262885	0.0276757	0.0253347	Rps24/Rpl14/Rps14/LOC100911847/Nsa2/Rps27/Rtraf/Rpl35a/Zc3h8/Spin1/NEWGENE_1306210/Utp14a/Utp3/Wars/Mecp2/Rexo4/Polr1b/Wdr12/Dars/Ncl/Mtfmt/Rps15/Rnf113a1/Pes1/Rpl10a/Pus1/Dars2/Adar/Qrsl1/Rrp15/Fcf1/Usb1/Mrpl44/Mtrex/Ftsj3/Eprs	36
GO:0035640	GO:0035640	BP	exploration behavior	7/767	31/17943	0.000271466	0.0279837	0.0256167	Shank2/Shank3/Atxn3/Dlg4/Nlgn2/Tnr/Abat	7
GO:0009208	GO:0009208	BP	pyrimidine ribonucleoside triphosphate metabolic process	5/767	15/17943	0.000295687	0.0298584	0.0273328	Nme1/Decr2/Nme4/Ak3/Nme3	5
GO:0001666	GO:0001666	BP	response to hypoxia	34/767	424/17943	0.000340935	0.0337389	0.0308851	Actn4/Cx3cl1/Creb1/Adora1/Il18/Dio3/Ppard/Hk2/Cdkn1b/Tsc2/Chrnb2/Vhl/Mecp2/Asl/Chchd2/Fam162a/Ogt/Ece1/Hp/P4hb/Ednra/Hmbs/Nos3/Ets1/Shc1/Zfp36l1/Xrcc1/Nfe2l2/Stub1/Txn2/Pdgfa/Abat/Trpc6/Endog	34
GO:0106027	GO:0106027	BP	neuron projection organization	13/767	101/17943	0.000364339	0.035348	0.0323581	Shank2/Insr/Shank3/Grin1/Dlg4/Homer1/Abhd17b/Shank1/Dvl1/Igf1r/Srcin1/Map1a/Abi2	13
GO:0098815	GO:0098815	BP	modulation of excitatory postsynaptic potential	9/767	53/17943	0.000371757	0.0353741	0.032382	Shank2/Shank3/Grin1/Grip2/Dlg4/Nlgn2/Shank1/Dvl1/Rims1	9
GO:0034248	GO:0034248	BP	regulation of cellular amide metabolic process	31/767	376/17943	0.000383213	0.0357762	0.0327501	Rps23/Grm5/Rida/Eif5/Casc3/Trnau1ap/Rplp2/Hnrnpd/Polr2g/Rps3/Hap1/Ncl/Mknk2/Mif4gd/Zfp36l2/Pdk2/Tsc1/Csnk1e/Igfbp5/Fastkd3/Rxra/Rps4x/Cnot10/Eif4e/Zfp36l1/Nfe2l2/Rplp1/Ncbp1/Fxr1/Cdk4/Eprs	31
GO:0097106	GO:0097106	BP	postsynaptic density organization	8/767	43/17943	0.000412421	0.037337	0.0341789	Shank2/Shank3/Dlg4/Syngap1/Nlgn2/Shank1/Dlg2/Nrxn2	8
GO:0098880	GO:0098880	BP	maintenance of postsynaptic specialization structure	5/767	16/17943	0.000415023	0.037337	0.0341789	Shank2/Shank3/Dlg4/Syngap1/Dlg2	5
GO:0050803	GO:0050803	BP	regulation of synapse structure or activity	25/767	280/17943	0.000430585	0.0376784	0.0344914	Amigo1/Shank2/Shank3/Nptxr/Tsc2/Grin1/Chrnb2/Adgrl1/Vhl/Mecp2/Lhfpl4/Grip2/Syngap1/Clstn3/Homer1/Abhd17b/Nlgn2/Taok2/Dab2ip/Rims4/Amigo2/Ncan/Srcin1/Ntrk2/Abi2	25
GO:0071375	GO:0071375	BP	cellular response to peptide hormone stimulus	30/767	362/17943	0.000434048	0.0376784	0.0344914	Nucks1/Rab8a/Adcy6/Creb1/Anxa5/Il18/Gfpt1/Insr/Insig1/Akap1/Pxn/Tsc2/Asl/Trarg1/Socs2/Ogt/Max/Pdk2/Tsc1/Nos3/Crk/Shc1/Rxra/Igf1r/Zfp36l1/Nfe2l2/Adipor1/Cdk4/Gdf15/Eprs	30
GO:0022037	GO:0022037	BP	metencephalon development	17/767	160/17943	0.0005043	0.043022	0.039383	Nr2c2/Aif1/Insr/Ncoa2/Mtpn/Grin1/Mecp2/Sdf4/Ak3/Hnrnpd/Hap1/Crk/Amigo2/Igf1r/Xrcc1/Uqcrq/Abat	17
GO:0045862	GO:0045862	BP	positive regulation of proteolysis	29/767	349/17943	0.000514497	0.043148	0.0394983	Apopt1/Btrc/Il33/Atxn3/Arih1/Arhgef2/Grin1/Psmc4/Bbs7/Fam162a/Arrb1/Ogt/F2r/Sumo1/Rps3/Timm23/Rnf40/Dab2ip/Csnk1e/Timm17a/Cntn2/Dvl1/Rnf144a/Arih2/Serpinb3/Stub1/Ppm1f/Tnp2/Aurkaip1	29
GO:0036293	GO:0036293	BP	response to decreased oxygen levels	35/767	453/17943	0.00055592	0.0444406	0.0406816	Actn4/Cx3cl1/Creb1/Adora1/Il18/Dio3/Ppard/Hk2/Cdkn1b/Tsc2/Chrnb2/Vhl/Mecp2/Asl/Chchd2/Fam162a/Ogt/Ece1/Hp/P4hb/Ednra/Hmbs/Tsc1/Nos3/Ets1/Shc1/Zfp36l1/Xrcc1/Nfe2l2/Stub1/Txn2/Pdgfa/Abat/Trpc6/Endog	35
GO:0001731	GO:0001731	BP	formation of translation preinitiation complex	4/767	10/17943	0.000565828	0.0444406	0.0406816	Eif5/Eif2s2/Eif4h/Rps2	4
GO:0006183	GO:0006183	BP	GTP biosynthetic process	4/767	10/17943	0.000565828	0.0444406	0.0406816	Nme1/Decr2/Nme4/Nme3	4
GO:0097237	GO:0097237	BP	cellular response to toxic substance	26/767	302/17943	0.0005808	0.0444406	0.0406816	Gstm5/Gstm3/Nqo1/Mff/Il18/Spi1/Rnf112/Klf2/Txn1/Gstk1/Ogt/Gpx6/Hp/Rps3/Selenow/Alox5ap/Nos3/Ets1/Fbxo7/Sirpa/Prdx5/Ccs/Nfe2l2/Trpc6/Selenot/Endog	26
GO:0051057	GO:0051057	BP	positive regulation of small GTPase mediated signal transduction	10/767	68/17943	0.000590955	0.0444406	0.0406816	Mcf2l/Rasgrp1/Arhgef2/Arrb1/F2r/Csf1/Mmd2/Gpr17/Adcyap1r1/Adgrg1	10
GO:0050807	GO:0050807	BP	regulation of synapse organization	24/767	270/17943	0.000592695	0.0444406	0.0406816	Amigo1/Shank2/Shank3/Nptxr/Tsc2/Grin1/Chrnb2/Adgrl1/Vhl/Mecp2/Lhfpl4/Grip2/Clstn3/Homer1/Abhd17b/Nlgn2/Taok2/Dab2ip/Rims4/Amigo2/Ncan/Srcin1/Ntrk2/Abi2	24
GO:0097061	GO:0097061	BP	dendritic spine organization	12/767	93/17943	0.000592781	0.0444406	0.0406816	Shank2/Insr/Shank3/Grin1/Dlg4/Homer1/Abhd17b/Shank1/Dvl1/Igf1r/Srcin1/Abi2	12
GO:0021549	GO:0021549	BP	cerebellum development	16/767	148/17943	0.000602759	0.0445142	0.040749	Nr2c2/Aif1/Insr/Ncoa2/Mtpn/Mecp2/Sdf4/Ak3/Hnrnpd/Hap1/Crk/Amigo2/Igf1r/Xrcc1/Uqcrq/Abat	16
GO:1901800	GO:1901800	BP	positive regulation of proteasomal protein catabolic process	13/767	107/17943	0.000639771	0.0459568	0.0420696	Il33/Atxn3/Arih1/Psmc4/Bbs7/Sumo1/Rnf40/Dab2ip/Csnk1e/Dvl1/Rnf144a/Arih2/Stub1	13
GO:0031646	GO:0031646	BP	positive regulation of neurological system process	11/767	81/17943	0.000640869	0.0459568	0.0420696	Shank2/Shank3/Grin1/Grip2/Dlg4/Nlgn2/Shank1/Dvl1/Tnr/Abat/Rims1	11
GO:0071383	GO:0071383	BP	cellular response to steroid hormone stimulus	25/767	288/17943	0.000651824	0.0460746	0.0421774	Nr2c2/Carm1/Adtrp/Ppard/Ncoa2/Dnaaf4/Lmnb1/Asl/Thrb/Clock/Fam107a/Zfp36l2/Hmbs/Paqr8/Rxra/Cry2/Thra/Igf1r/Rxrb/Hcn2/Eif4e/Zfp36l1/Ntrk2/Rbfox2/Ube2i	25
GO:0006801	GO:0006801	BP	superoxide metabolic process	10/767	69/17943	0.000665124	0.0463526	0.0424319	Nqo1/Il18/Ncf1/Nos3/Shc1/Tyrobp/Ccs/Nfe2l2/Cyb5r4/Nox1	10
GO:0051591	GO:0051591	BP	response to cAMP	16/767	150/17943	0.00069855	0.0480059	0.0439453	Nme1/Fosl1/Carm1/Il18/Crem/Akap1/Asl/Rplp2/Atp7b/Vgf/Igfbp5/Nos3/Hcn2/Zfp36l1/Rplp1/Aqp9	16
GO:0014074	GO:0014074	BP	response to purine-containing compound	21/767	226/17943	0.000721392	0.0488965	0.0447606	Nme1/Fosl1/Plcg2/Carm1/Aacs/Il18/Crem/Trpv1/Akap1/Asl/Rplp2/Atp7b/Vgf/Igfbp5/Nos3/Hcn2/Zfp36l1/Rplp1/Aqp9/Slc6a1/Hmgcs1	21
GO:0071625	GO:0071625	BP	vocalization behavior	5/767	18/17943	0.000758135	0.050315	0.0460591	Shank2/Shank3/Dlg4/Shank1/Nrxn2	5
GO:0010288	GO:0010288	BP	response to lead ion	8/767	47/17943	0.000769374	0.050315	0.0460591	Anxa5/Mecp2/Hp/Bace1/Hmbs/Nos3/Slc6a1/Cdk4	8
GO:0022618	GO:0022618	BP	ribonucleoprotein complex assembly	23/767	259/17943	0.000773979	0.050315	0.0460591	Rps23/Rps25/mrpl11/Rps14/LOC100911847/Rps27/Rps19/Eif5/Rps10/Rpl24/Gemin6/G3bp2/Ptges3l1/Sf3a2/Eif2s2/Rps15/Adar/Isy1/Psip1/Rpl3/Ncbp1/Eif4h/Rps2	23
GO:0098869	GO:0098869	BP	cellular oxidant detoxification	12/767	96/17943	0.000791178	0.050315	0.0460591	Nqo1/Txn1/Gstk1/Gpx6/Hp/Selenow/Alox5ap/Nos3/Prdx5/Ccs/Nfe2l2/Selenot	12
GO:0034470	GO:0034470	BP	ncRNA processing	27/767	325/17943	0.000793163	0.050315	0.0460591	Rps24/Rpl14/Rps14/LOC100911847/Nsa2/Rps27/Rtraf/Rpl35a/Utp14a/Utp3/Mecp2/Rexo4/Wdr12/Ncl/Mtfmt/Rps15/Rnf113a1/Pes1/Rpl10a/Pus1/Adar/Rrp15/Fcf1/Usb1/Mrpl44/Mtrex/Ftsj3	27
GO:0098698	GO:0098698	BP	postsynaptic specialization assembly	6/767	27/17943	0.000819188	0.0513081	0.0469682	Shank2/Shank3/Nptxr/Nlgn2/Shank1/Nrxn2	6
GO:0032868	GO:0032868	BP	response to insulin	27/767	326/17943	0.000830704	0.0513791	0.0470332	Nucks1/Rab8a/Got2/Gfpt1/Insr/Insig1/Tsc2/Trarg1/Socs2/Gcnt1/Ogt/Vgf/Max/Pdk2/Tsc1/Ggh/Nos3/Shc1/Rxra/Cry2/Igf1r/Zfp36l1/Gal/Adipor1/Cdk4/Abcc8/Eprs	27
GO:0099562	GO:0099562	BP	maintenance of postsynaptic density structure	4/767	11/17943	0.000859167	0.051444	0.0470926	Shank2/Shank3/Dlg4/Dlg2	4
GO:1904862	GO:1904862	BP	inhibitory synapse assembly	4/767	11/17943	0.000859167	0.051444	0.0470926	Gabrb3/Gabra1/Lhfpl4/Nlgn2	4
GO:0050773	GO:0050773	BP	regulation of dendrite development	19/767	198/17943	0.000862945	0.051444	0.0470926	Carm1/Shank2/Shank3/Tsc2/Grin1/Chrnb2/Gorasp1/Mecp2/Crtc1/Ss18l1/Nlgn2/Dab2ip/Shank1/Crk/Srcin1/Ntrk2/Tmem106b/Abi2/Trpc6	19
GO:0019233	GO:0019233	BP	sensory perception of pain	16/767	154/17943	0.000929538	0.0547542	0.0501229	Adora1/Il18/Trpv1/Kcnj10/Grin1/Chrnb2/Mecp2/Cacna1e/Arrb1/F2r/Bace1/Nlgn2/Ednra/Fcgr3a/Kcnip3/Dlg2	16
GO:0046579	GO:0046579	BP	positive regulation of Ras protein signal transduction	9/767	60/17943	0.000950359	0.0553221	0.0506427	Mcf2l/Rasgrp1/Arhgef2/Arrb1/F2r/Csf1/Mmd2/Gpr17/Adgrg1	9
GO:0042274	GO:0042274	BP	ribosomal small subunit biogenesis	11/767	85/17943	0.000966521	0.0556087	0.050905	Rps25/Rps24/Rps14/LOC100911847/Rps27/Rps19/Rps10/Utp3/Rps15/Fcf1/Rps2	11
GO:0030150	GO:0030150	BP	protein import into mitochondrial matrix	5/767	19/17943	0.000992972	0.0564738	0.051697	Grpel1/Timm23/LOC100362432/Timm17a/Tomm40l	5
GO:0046131	GO:0046131	BP	pyrimidine ribonucleoside metabolic process	6/767	28/17943	0.00100532	0.0565265	0.0517452	Nme1/Decr2/Nme4/Ak3/Cdadc1/Nme3	6
GO:0006417	GO:0006417	BP	regulation of translation	27/767	331/17943	0.00104258	0.0579626	0.0530599	Rps23/Grm5/Rida/Eif5/Casc3/Trnau1ap/Rplp2/Hnrnpd/Polr2g/Rps3/Ncl/Mknk2/Mif4gd/Zfp36l2/Tsc1/Igfbp5/Fastkd3/Rxra/Rps4x/Cnot10/Eif4e/Zfp36l1/Rplp1/Ncbp1/Fxr1/Cdk4/Eprs	27
GO:0014066	GO:0014066	BP	regulation of phosphatidylinositol 3-kinase signaling	12/767	100/17943	0.0011393	0.062133	0.0568775	Il18/Rasgrp1/Insr/Ppard/Tsc2/Ncf1/F2r/Dab2ip/Igf1r/Ntrk2/Pdgfa/Erbb4	12
GO:0098693	GO:0098693	BP	regulation of synaptic vesicle cycle	16/767	157/17943	0.0011427	0.062133	0.0568775	Scamp5/Mff/Chrnb2/Nrn1/Syt7/Pip5k1c/Bace1/Ncs1/Prepl/Nlgn2/Syn1/Cyth1/Rims4/Apba1/Dvl1/Rims1	16
GO:0042176	GO:0042176	BP	regulation of protein catabolic process	30/767	385/17943	0.0011755	0.0632214	0.0578738	Os9/Cyp51/Gga1/Rpl23/Furin/Btrc/Il33/Azin1/Yod1/Atxn3/Dnaaf4/Cdkn1b/Arih1/Psmc4/Snf8/Vhl/Sufu/Bbs7/Ogt/Sumo1/Rnf40/Dab2ip/Csnk1e/Dvl1/Rnf144a/Arih2/Stub1/Gabarapl2/Map1a/Uchl5	30
GO:0034101	GO:0034101	BP	erythrocyte homeostasis	15/767	143/17943	0.00120308	0.0640092	0.058595	Rps24/Rps14/Rps19/Acvr1b/Spi1/Klf2/LOC498453/Ets1/Adar/Thra/Zfp36l1/Gata3/Slc25a38/Rbfox2/Jmjd6	15
GO:0046039	GO:0046039	BP	GTP metabolic process	6/767	29/17943	0.0012223	0.0643396	0.0588974	Nme1/Decr2/Nme4/Ak3/Nme3/Mocs2	6
GO:2000322	GO:2000322	BP	regulation of glucocorticoid receptor signaling pathway	4/767	12/17943	0.00124535	0.0648628	0.0593764	Ncoa2/Clock/Cry2/Ntrk2	4
GO:0097107	GO:0097107	BP	postsynaptic density assembly	5/767	20/17943	0.00127779	0.0658592	0.0602885	Shank2/Shank3/Nlgn2/Shank1/Nrxn2	5
GO:0006164	GO:0006164	BP	purine nucleotide biosynthetic process	22/767	253/17943	0.00131016	0.0668317	0.0611787	Nme1/Atp5pd/Adcy6/Ak2/Insr/Hk2/Pgam2/Prpsap1/Adcy5/Decr2/Nme4/Ak3/Ogt/Ak6/Pdk2/Mpc2/Nos3/Aldoart2/Nme3/Paics/Dlat/Mthfd1	22
GO:0045454	GO:0045454	BP	cell redox homeostasis	9/767	63/17943	0.00135791	0.0685605	0.0627613	Txn1/Dnajc16/Glrx2/Txndc9/P4hb/Prdx5/Nfe2l2/Txn2/Selenot	9
GO:0071248	GO:0071248	BP	cellular response to metal ion	21/767	238/17943	0.00139284	0.0696137	0.0637254	Creb1/Nqo1/Anxa5/Cdkn1b/Grin1/Mecp2/Atp7b/Ncf1/Syt7/Dlg4/Mt1/Sumo1/Bace1/Krt10/Hmbs/Alox5ap/Nos3/Ank3/Dlg2/Nfe2l2/Endog	21
GO:1901661	GO:1901661	BP	quinone metabolic process	6/767	30/17943	0.00147333	0.0728924	0.0667268	Coq7/Coq2/Coq3/Akr7a2/Coq4/Cbr4	6
GO:0071826	GO:0071826	BP	ribonucleoprotein complex subunit organization	23/767	272/17943	0.00149168	0.0728924	0.0667268	Rps23/Rps25/mrpl11/Rps14/LOC100911847/Rps27/Rps19/Eif5/Rps10/Rpl24/Gemin6/G3bp2/Ptges3l1/Sf3a2/Eif2s2/Rps15/Adar/Isy1/Psip1/Rpl3/Ncbp1/Eif4h/Rps2	23
GO:0030218	GO:0030218	BP	erythrocyte differentiation	14/767	132/17943	0.00155577	0.0728924	0.0667268	Rps14/Rps19/Acvr1b/Spi1/Klf2/LOC498453/Ets1/Adar/Thra/Zfp36l1/Gata3/Slc25a38/Rbfox2/Jmjd6	14
GO:0071320	GO:0071320	BP	cellular response to cAMP	10/767	77/17943	0.00158001	0.0728924	0.0667268	Il18/Akap1/Asl/Rplp2/Igfbp5/Nos3/Hcn2/Zfp36l1/Rplp1/Aqp9	10
GO:0006413	GO:0006413	BP	translational initiation	13/767	118/17943	0.00160076	0.0728924	0.0667268	Rps24/Eif5/Polr2g/Eif2s2/Mif4gd/Mtfmt/Eif4a2/Rxra/Eif4e/Ncbp1/Eif4h/Rps2/Eif2b4	13
GO:0046683	GO:0046683	BP	response to organophosphorus	18/767	193/17943	0.00161151	0.0728924	0.0667268	Nme1/Fosl1/Plcg2/Carm1/Il18/Crem/Trpv1/Akap1/Asl/Rplp2/Atp7b/Vgf/Igfbp5/Nos3/Hcn2/Zfp36l1/Rplp1/Aqp9	18
GO:0008090	GO:0008090	BP	retrograde axonal transport	5/767	21/17943	0.00161867	0.0728924	0.0667268	Mecp2/Hap1/Kif1b/Dlg2/Map1a	5
GO:0030902	GO:0030902	BP	hindbrain development	19/767	209/17943	0.00163518	0.0728924	0.0667268	Nr2c2/Aif1/Insr/Ncoa2/Mtpn/Grin1/Mecp2/Cul5/Sdf4/Ak3/Hnrnpd/Hap1/Crk/Amigo2/Igf1r/Xrcc1/Uqcrq/Rbfox2/Abat	19
GO:0042391	GO:0042391	BP	regulation of membrane potential	34/767	464/17943	0.00163552	0.0728924	0.0667268	Grm5/Gabrb3/Scn4b/Cx3cl1/Scn2b/Adora1/Shank2/Kcnd3/Shank3/Trpv1/Cntnap1/Atxn1/Kcnj10/Grin1/Chrnb2/Mecp2/Begain/Gabra1/Grip2/Dlg4/Crtc1/Kcnq2/Sumo1/Nlgn2/Kcnh7/Shank1/Rims4/Dvl1/Ank3/Hcn2/Chchd10/Ntrk2/Abat/Rims1	34
GO:0002262	GO:0002262	BP	myeloid cell homeostasis	17/767	178/17943	0.00166267	0.0728924	0.0667268	Rps24/Rps14/Rps19/Acvr1b/Il18/Spi1/Klf2/LOC498453/Ets1/Adar/Thra/Zfp36l1/Gata3/Mthfd1/Slc25a38/Rbfox2/Jmjd6	17
GO:0070997	GO:0070997	BP	neuron death	32/767	429/17943	0.00166937	0.0728924	0.0667268	Gabrb3/Atf2/Cx3cl1/Creb1/Nqo1/Adora1/Il18/Ap2b1/Dio3/Grin1/Mecp2/Thrb/Fam162a/Syngap1/Arrb1/Map2k7/Mt1/Sct/F2r/Csf1/Bace1/Max/Tsc1/Barhl1/Fbxo7/Amigo2/Tyrobp/Sncg/Kcnip3/Gata3/Ntrk2/Endog	32
GO:0014065	GO:0014065	BP	phosphatidylinositol 3-kinase signaling	14/767	133/17943	0.00167221	0.0728924	0.0667268	Il18/Rasgrp1/Insr/Ppard/Tsc2/Ncf1/F2r/Dab2ip/Igf1r/Zfp36l1/Gata3/Ntrk2/Pdgfa/Erbb4	14
GO:0046488	GO:0046488	BP	phosphatidylinositol metabolic process	14/767	133/17943	0.00167221	0.0728924	0.0667268	Pip4p1/Plcg2/Inpp4a/Pigu/Socs2/Pigy/Pip5k1c/Pip4k2b/Ip6k1/Pgap1/Tmem150a/Pdgfa/Dpm2/Gpaa1	14
GO:0010498	GO:0010498	BP	proteasomal protein catabolic process	33/767	447/17943	0.00168512	0.0728924	0.0667268	Os9/Sel1l/Uggt1/Btrc/Il33/Yod1/Atxn3/Dnaaf4/Arih1/Psmc4/Vhl/Sharpin/Cul5/Clock/Bbs7/Arrb1/Ogt/Sumo1/Rnf40/Dab2ip/Csnk1e/Otud5/Ube4a/Dvl1/Rnf144a/Arih2/Nfe2l2/Stub1/Gabarapl2/Map1a/Uchl5/Ube2i/Ube2j2	33
GO:0034765	GO:0034765	BP	regulation of ion transmembrane transport	35/767	483/17943	0.00169867	0.0728924	0.0667268	Grm5/S100a1/Amigo1/Scn4b/Plcg2/Cx3cl1/Cox17/Scn2b/Shank2/Kcnd3/Shank3/Kcnj4/Kcnj10/Kcnj9/Cacna1e/Dlg4/Kcnq2/Homer1/F2r/Sumo1/Hap1/Nlgn2/Kcnh7/Ednra/Cacnb1/Shank1/Kcna3/Ank3/Hcn2/Kcnip3/Chchd10/Tpcn1/Gal/Abcc8/Trpc6	35
GO:0002087	GO:0002087	BP	regulation of respiratory gaseous exchange by neurological system process	4/767	13/17943	0.00173834	0.0728924	0.0667268	Adora1/Mecp2/Gls/Nlgn2	4
GO:0006241	GO:0006241	BP	CTP biosynthetic process	4/767	13/17943	0.00173834	0.0728924	0.0667268	Nme1/Decr2/Nme4/Nme3	4
GO:0046036	GO:0046036	BP	CTP metabolic process	4/767	13/17943	0.00173834	0.0728924	0.0667268	Nme1/Decr2/Nme4/Nme3	4
GO:1901070	GO:1901070	BP	guanosine-containing compound biosynthetic process	4/767	13/17943	0.00173834	0.0728924	0.0667268	Nme1/Decr2/Nme4/Nme3	4
GO:0048167	GO:0048167	BP	regulation of synaptic plasticity	26/767	327/17943	0.00183674	0.0756259	0.0692291	Grm5/Rab8a/Creb1/Adora1/Shank2/Shank3/Synpo/Kcnj10/Grin1/Mecp2/Syt7/Dlg4/Syngap1/Crtc1/Sct/Vgf/Fam107a/Shank1/Cntn2/Rims4/Tyrobp/Tnr/Rab11a/Map1a/Ntrk2/Rims1	26
GO:0072522	GO:0072522	BP	purine-containing compound biosynthetic process	22/767	260/17943	0.0018542	0.0756259	0.0692291	Nme1/Atp5pd/Adcy6/Ak2/Insr/Hk2/Pgam2/Prpsap1/Adcy5/Decr2/Nme4/Ak3/Ogt/Ak6/Pdk2/Mpc2/Nos3/Aldoart2/Nme3/Paics/Dlat/Mthfd1	22
GO:0042255	GO:0042255	BP	ribosome assembly	11/767	92/17943	0.00185998	0.0756259	0.0692291	Rps25/mrpl11/Rps14/LOC100911847/Rps27/Rps19/Rps10/Rpl24/Rps15/Rpl3/Rps2	11
GO:1903052	GO:1903052	BP	positive regulation of proteolysis involved in cellular protein catabolic process	13/767	120/17943	0.00186466	0.0756259	0.0692291	Il33/Atxn3/Arih1/Psmc4/Bbs7/Sumo1/Rnf40/Dab2ip/Csnk1e/Dvl1/Rnf144a/Arih2/Stub1	13
GO:0006661	GO:0006661	BP	phosphatidylinositol biosynthetic process	9/767	66/17943	0.00189563	0.0762567	0.0698065	Plcg2/Inpp4a/Pigu/Pigy/Pip5k1c/Pgap1/Pdgfa/Dpm2/Gpaa1	9
GO:0009896	GO:0009896	BP	positive regulation of catabolic process	32/767	433/17943	0.00193362	0.0771575	0.0706311	Gga1/Adora1/Insr/Il33/Hk2/Atxn3/Cdkn1b/Arih1/Tsc2/Psmc4/Snf8/Bbs7/Ikbkg/Sct/Pip4k2b/Sumo1/Hnrnpd/Polr2g/Zfp36l2/Rnf40/Tsc1/Dab2ip/Csnk1e/Fbxo7/Dvl1/Rnf144a/Arih2/Tpcn1/Zfp36l1/Stub1/Dxo/Endog	32
GO:0009218	GO:0009218	BP	pyrimidine ribonucleotide metabolic process	5/767	22/17943	0.00202185	0.0787726	0.0721097	Nme1/Decr2/Nme4/Ak3/Nme3	5
GO:0060080	GO:0060080	BP	inhibitory postsynaptic potential	5/767	22/17943	0.00202185	0.0787726	0.0721097	Gabrb3/Cx3cl1/Nlgn2/Abat/Rims1	5
GO:0097062	GO:0097062	BP	dendritic spine maintenance	5/767	22/17943	0.00202185	0.0787726	0.0721097	Insr/Grin1/Homer1/Abhd17b/Igf1r	5
GO:0099003	GO:0099003	BP	vesicle-mediated transport in synapse	22/767	262/17943	0.00204114	0.0789028	0.0722288	Scamp5/Rab8a/Bloc1s2/Vti1a/Mff/Ap2b1/Chrnb2/Nrn1/Syt7/Grip2/Pip5k1c/Bace1/Hap1/Ncs1/Prepl/Nlgn2/Cyth1/Rims4/Apba1/Dvl1/Rab11a/Rims1	22
GO:0070536	GO:0070536	BP	protein K63-linked deubiquitination	6/767	32/17943	0.00209109	0.0795901	0.072858	Desi2/Uimc1/Spata2/Yod1/Atxn3/Otud5	6
GO:0099068	GO:0099068	BP	postsynapse assembly	6/767	32/17943	0.00209109	0.0795901	0.072858	Shank2/Shank3/Nptxr/Nlgn2/Shank1/Nrxn2	6
GO:0051260	GO:0051260	BP	protein homooligomerization	30/767	400/17943	0.00211485	0.0798801	0.0731234	Mff/Anxa5/Srr/Gfpt1/Kcnd3/Nacc1/Trpv1/Golga2/Rnf112/Kcnj10/Cd79b/Tsc2/Sharpin/Crtc1/Ak3/Dctpp1/G3bp2/Gls/Ogt/Tmem120a/Alox5ap/Dcxr/Rxra/Kcna3/Cbr4/Tifa/Dync1li2/Slc6a1/Lamp2/Jmjd6	30
GO:0048872	GO:0048872	BP	homeostasis of number of cells	25/767	314/17943	0.00218585	0.0819363	0.0750057	Rps24/Rps14/Zc3h8/Rps19/Acvr1b/Il18/Spi1/Chst3/Vhl/Klf2/Ikbkg/F2r/Csf1/LOC498453/Nos3/Ets1/Prdx5/Adar/Thra/Zfp36l1/Gata3/Mthfd1/Slc25a38/Rbfox2/Jmjd6	25
GO:0042273	GO:0042273	BP	ribosomal large subunit biogenesis	11/767	94/17943	0.00221238	0.0823071	0.0753451	mrpl11/Rpl14/Rpl35al1/Rpl35a/Rpl24/Wdr12/Pes1/Rpl10a/Pak1ip1/Rpl3/Ftsj3	11
GO:0009209	GO:0009209	BP	pyrimidine ribonucleoside triphosphate biosynthetic process	4/767	14/17943	0.00235196	0.0855698	0.0783319	Nme1/Decr2/Nme4/Nme3	4
GO:0021554	GO:0021554	BP	optic nerve development	4/767	14/17943	0.00235196	0.0855698	0.0783319	Rpl24/Kcnj10/Chrnb2/Tmem126a	4
GO:0045161	GO:0045161	BP	neuronal ion channel clustering	4/767	14/17943	0.00235196	0.0855698	0.0783319	Dlg4/Cntn2/Ank3/Dlg2	4
GO:0006220	GO:0006220	BP	pyrimidine nucleotide metabolic process	7/767	44/17943	0.0024437	0.0873526	0.0799639	Nme1/Decr2/Nme4/Ak3/Dctpp1/Cdadc1/Nme3	7
GO:0006163	GO:0006163	BP	purine nucleotide metabolic process	34/767	476/17943	0.00247866	0.0873526	0.0799639	Nme1/Ndufs6/Atp5pd/Cox4i1/Adcy6/Uqcrh/Ak2/Insr/Coq7/Hk2/Pgam2/Prpsap1/Cs/Mecp2/Adcy5/Decr2/Nme4/Ak3/Ogt/Nudt9/Ak6/Pdk2/Mpc2/Nos3/Cox7a2/Aldoart2/Nme3/Chchd10/Paics/Dlat/Mthfd1/Uqcrq/Mocs2/Hmgcs1	34
GO:0007585	GO:0007585	BP	respiratory gaseous exchange	8/767	56/17943	0.00248032	0.0873526	0.0799639	Adora1/Grin1/Mecp2/Gls/Nlgn2/Ednra/Stk40/Ndst1	8
GO:0051932	GO:0051932	BP	synaptic transmission, GABAergic	8/767	56/17943	0.00248032	0.0873526	0.0799639	Gabrb3/Adora1/Gabra1/Clstn3/Hap1/Nlgn2/Slc6a1/Erbb4	8
GO:0043576	GO:0043576	BP	regulation of respiratory gaseous exchange	5/767	23/17943	0.00249368	0.0873526	0.0799639	Adora1/Grin1/Mecp2/Gls/Nlgn2	5
GO:0006839	GO:0006839	BP	mitochondrial transport	17/767	185/17943	0.00250689	0.0873526	0.0799639	Atf2/Bloc1s2/Mff/Hk2/Grpel1/Sfxn3/Timm23/LOC100362432/Maip1/Timm17a/Bcl2l2/Mpc2/Tomm40l/Fbxo7/Chchd10/Them4/Slc25a38	17
GO:0006732	GO:0006732	BP	coenzyme metabolic process	26/767	336/17943	0.00266814	0.0923214	0.0845124	Insr/Coq7/Slc23a2/Hk2/Coq2/Coq3/Pgam2/Cs/Ogt/Ak6/Pdk2/Ggh/Enoph1/Mpc2/Dcxr/Kif1b/Pdxk/Prdx5/Coq4/Aldoart2/Cyb5r4/Dlat/Rpe/Mthfd1/Mocs2/Hmgcs1	26
GO:0090317	GO:0090317	BP	negative regulation of intracellular protein transport	7/767	45/17943	0.00278912	0.0958372	0.0877309	Os9/Insig1/Yod1/Akap1/Txn1/Ogt/Pkig	7
GO:0006213	GO:0006213	BP	pyrimidine nucleoside metabolic process	6/767	34/17943	0.00288652	0.0985001	0.0901685	Nme1/Decr2/Nme4/Ak3/Cdadc1/Nme3	6
GO:1903363	GO:1903363	BP	negative regulation of cellular protein catabolic process	10/767	84/17943	0.0030452	0.101964	0.0933397	Os9/Rpl23/Furin/Yod1/Sufu/Ogt/Dab2ip/Gabarapl2/Map1a/Uchl5	10
GO:0070301	GO:0070301	BP	cellular response to hydrogen peroxide	13/767	127/17943	0.00308596	0.101964	0.0933397	Nqo1/Mff/Il18/Rnf112/Klf2/Txn1/Rps3/Ets1/Fbxo7/Sirpa/Nfe2l2/Trpc6/Endog	13
GO:0002830	GO:0002830	BP	positive regulation of type 2 immune response	4/767	15/17943	0.0030997	0.101964	0.0933397	Il4r/Il18/Il33/Gata3	4
GO:0035641	GO:0035641	BP	locomotory exploration behavior	4/767	15/17943	0.0030997	0.101964	0.0933397	Shank3/Dlg4/Nlgn2/Tnr	4
GO:0007528	GO:0007528	BP	neuromuscular junction development	8/767	58/17943	0.00310598	0.101964	0.0933397	Shank2/Shank3/F2r/Cacnb1/Shank1/Dvl1/Ank3/Ntrk2	8
GO:0030534	GO:0030534	BP	adult behavior	17/767	189/17943	0.00313229	0.101964	0.0933397	Tbce/Abhd12/Shank2/Shank3/Atxn1/Kcnj10/Grin1/Chrnb2/Mecp2/Homer1/Nlgn2/Tsc1/Shank1/Cntn2/Sncg/Abat/Nrxn2	17
GO:0051668	GO:0051668	BP	localization within membrane	17/767	189/17943	0.00313229	0.101964	0.0933397	Rab8a/Ap2b1/Shank3/Insig1/Nptxr/Tsc2/Lhfpl4/Grip2/Pip5k1c/Dlg4/Syngap1/Hap1/Tyrobp/Dvl1/Rab11a/Dlg2/Nrxn2	17
GO:0019693	GO:0019693	BP	ribose phosphate metabolic process	34/767	484/17943	0.0032289	0.103844	0.09506	Nme1/Ndufs6/Atp5pd/Cox4i1/Adcy6/Uqcrh/Ak2/Insr/Coq7/Hk2/Pgam2/Prpsap1/Cs/Mecp2/Adcy5/Decr2/Nme4/Ak3/Ogt/Nudt9/Ak6/Pdk2/Mpc2/Kif1b/Cox7a2/Aldoart2/Nme3/Chchd10/Paics/Dlat/Rpe/Uqcrq/Mocs2/Hmgcs1	34
GO:0072594	GO:0072594	BP	establishment of protein localization to organelle	28/767	376/17943	0.00323199	0.103844	0.09506	Vti1a/Mff/Akap1/Hk2/Acd/Pom121/Tsc2/Pmm1/Snf8/Grpel1/Timm23/LOC100362432/Cct6a/Maip1/Kpna5/Timm17a/Tomm40l/Fbxo7/Cry2/Adar/Brca2/M6pr/Rab11a/Pkig/Nup107/Ap4m1/Lamp2/Cct2	28
GO:0008380	GO:0008380	BP	RNA splicing	26/767	341/17943	0.00325504	0.103909	0.0951201	Rps13/Carm1/Rtraf/Casc3/Srek1/Prpf38b/Gemin6/Dazap1/Thrap3/Snrnp35/Sf3a2/Srsf11/Rnf113a1/Srek1ip1/RGD1305178/Ddx39a/Isy1/Psip1/Usb1/Ncbp1/Clasrp/Rbfox2/U2af1l4/Wdr83/Jmjd6/Dcps	26
GO:0015749	GO:0015749	BP	monosaccharide transmembrane transport	13/767	128/17943	0.00330421	0.104235	0.0954183	Rab8a/Insr/Slc23a2/Slc2a3/LOC100909595/Hk2/Tsc2/Trarg1/Ednra/Tsc1/Naglt1/Nfe2l2/Erbb4	13
GO:0051262	GO:0051262	BP	protein tetramerization	17/767	190/17943	0.00330737	0.104235	0.0954183	Srr/Gfpt1/Insr/Trpv1/Uxs1/Golga2/Kcnj10/Grin1/Crtc1/Dctpp1/Homer1/Gls/Krt10/Dcxr/Rxra/Igf1r/Cbr4	17
GO:0051402	GO:0051402	BP	neuron apoptotic process	24/767	307/17943	0.00335103	0.104942	0.0960659	Gabrb3/Atf2/Cx3cl1/Nqo1/Il18/Dio3/Grin1/Mecp2/Thrb/Fam162a/Syngap1/Arrb1/Map2k7/Mt1/Sct/F2r/Bace1/Max/Barhl1/Amigo2/Tyrobp/Kcnip3/Gata3/Ntrk2	24
GO:0009064	GO:0009064	BP	glutamine family amino acid metabolic process	9/767	72/17943	0.00347507	0.107873	0.0987489	Got2/Gfpt1/Mecp2/Asl/Gls/Asrgl1/Nos3/Ddah2/Pycr2	9
GO:0050806	GO:0050806	BP	positive regulation of synaptic transmission	24/767	308/17943	0.00349204	0.107873	0.0987489	Creb1/Adora1/Shank2/Shank3/Grin1/Chrnb2/Mecp2/Syt7/Grip2/Dlg4/Crtc1/Clstn3/Hap1/Nlgn2/Fam107a/Shank1/Rims4/Tyrobp/Dvl1/Tnr/Ntrk2/Abat/Rims1/Erbb4	24
GO:0007623	GO:0007623	BP	circadian rhythm	21/767	257/17943	0.00351768	0.107873	0.0987489	Adcy6/Creb1/Btrc/Adora1/Il18/Gfpt1/Crem/Ncoa2/Chrnb2/Atp7b/Clock/Thrap3/Crtc1/Homer1/Ogt/Hnrnpd/Kcnh7/Csnk1e/Cry2/Ntrk2/Cdk4	21
GO:0006520	GO:0006520	BP	cellular amino acid metabolic process	22/767	274/17943	0.00353183	0.107873	0.0987489	Hibch/Got2/Srr/Gfpt1/Azin1/Wars/Mecp2/Asl/Gls/Dars/P4hb/Asrgl1/Enoph1/Nos3/Dars2/Pcyox1/Qrsl1/Mthfd1/Abat/Ddah2/Eprs/Pycr2	22
GO:0001941	GO:0001941	BP	postsynaptic membrane organization	7/767	47/17943	0.00359099	0.109008	0.0997872	Shank3/Lhfpl4/Grip2/Dlg4/Nlgn2/Dvl1/Nrxn2	7
GO:0071450	GO:0071450	BP	cellular response to oxygen radical	5/767	25/17943	0.0036689	0.110022	0.100716	Nqo1/Glrx2/Nos3/Ccs/Nfe2l2	5
GO:0071451	GO:0071451	BP	cellular response to superoxide	5/767	25/17943	0.0036689	0.110022	0.100716	Nqo1/Glrx2/Nos3/Ccs/Nfe2l2	5
GO:0045666	GO:0045666	BP	positive regulation of neuron differentiation	33/767	471/17943	0.00383174	0.113144	0.103573	Nme1/Amigo1/Cx3cl1/Shank2/Tgif1/Shank3/Golga2/Rnf112/Arhgef2/Tsc2/Mecp2/Creb3l2/Socs2/Grip2/Dlg4/Crtc1/Sf3a2/Ss18l1/Hap1/Nlgn2/Mmd2/Dab2ip/Csnk1e/Mark2/Shank1/Dvl1/Igf1r/Rab11a/Nfe2l2/Ntrk2/Tmem106b/Rims1/Trpc6	33
GO:0034612	GO:0034612	BP	response to tumor necrosis factor	21/767	259/17943	0.00384921	0.113144	0.103573	Actn4/Cx3cl1/Il18/Spata2/Insr/Asah1/Trpv1/Arhgef2/Asl/Sharpin/Klf2/Map2k7/Rps3/Zfp36l2/Dab2ip/Nos3/Zfp36l1/Nfe2l2/Gata3/Ntrk2/Endog	21
GO:0009416	GO:0009416	BP	response to light stimulus	25/767	328/17943	0.00387963	0.113144	0.103573	Hmgn1/Creb1/Atxn1/Synpo/Kcnj10/Grin1/Chrnb2/Pde1b/Mecp2/Cacna1e/Clock/Sdf4/Syngap1/Crtc1/Arrb1/Map2k7/Sct/Sde2/Cry2/Dcun1d3/Brca2/Ntrk2/Abcc8/Deaf1/Hmgcs1	25
GO:0072593	GO:0072593	BP	reactive oxygen species metabolic process	23/767	294/17943	0.00399399	0.113144	0.103573	Aif1/Nqo1/Il18/Insr/Coq7/Trpv1/Mpv17/Hk2/Grin1/Klf2/Ncf1/Ogt/Hp/Nos3/Shc1/Sirpa/Tyrobp/Prdx5/Ccs/Nfe2l2/Cyb5r4/Ddah2/Nox1	23
GO:0006744	GO:0006744	BP	ubiquinone biosynthetic process	4/767	16/17943	0.00399459	0.113144	0.103573	Coq7/Coq2/Coq3/Coq4	4
GO:0042921	GO:0042921	BP	glucocorticoid receptor signaling pathway	4/767	16/17943	0.00399459	0.113144	0.103573	Ncoa2/Clock/Cry2/Ntrk2	4
GO:0044065	GO:0044065	BP	regulation of respiratory system process	4/767	16/17943	0.00399459	0.113144	0.103573	Adora1/Mecp2/Gls/Nlgn2	4
GO:0070200	GO:0070200	BP	establishment of protein localization to telomere	4/767	16/17943	0.00399459	0.113144	0.103573	Acd/Cct6a/Brca2/Cct2	4
GO:1901663	GO:1901663	BP	quinone biosynthetic process	4/767	16/17943	0.00399459	0.113144	0.103573	Coq7/Coq2/Coq3/Coq4	4
GO:0006605	GO:0006605	BP	protein targeting	21/767	260/17943	0.00402451	0.113144	0.103573	Os9/Vti1a/Mff/Adora1/Pmm1/Ncf1/Grpel1/Ogt/Hap1/Timm23/LOC100362432/Cacnb1/Timm17a/Tomm40l/Fbxo7/LOC499136/M6pr/Ank3/Ap4m1/Zdhhc20/Lamp2	21
GO:0032412	GO:0032412	BP	regulation of ion transmembrane transporter activity	21/767	260/17943	0.00402451	0.113144	0.103573	Grm5/S100a1/Amigo1/Scn4b/Plcg2/Cox17/Scn2b/Shank2/Shank3/Dlg4/Homer1/Sumo1/Hap1/Nlgn2/Cacnb1/Shank1/Ank3/Chchd10/Gal/Abcc8/Trpc6	21
GO:0048511	GO:0048511	BP	rhythmic process	28/767	383/17943	0.00417118	0.11532	0.105566	Adcy6/Creb1/Btrc/Tef/Adora1/Il18/Gfpt1/Capn5/Crem/Ncoa2/Grin1/Chrnb2/Atp7b/Clock/Thrap3/Crtc1/Arrb1/Homer1/Ogt/Hnrnpd/Kcnh7/Csnk1e/Nos3/Ets1/Cry2/Igf1r/Ntrk2/Cdk4	28
GO:0014068	GO:0014068	BP	positive regulation of phosphatidylinositol 3-kinase signaling	9/767	74/17943	0.00418497	0.11532	0.105566	Il18/Insr/Ppard/Ncf1/F2r/Igf1r/Ntrk2/Pdgfa/Erbb4	9
GO:0006813	GO:0006813	BP	potassium ion transport	20/767	244/17943	0.00418528	0.11532	0.105566	Amigo1/Adora1/Kcnd3/Slc9a8/Kcnj4/Cdkn1b/Kcnj10/Kcnj9/Slc12a5/Kcnq2/Sumo1/Kcnh7/Tsc1/Nos3/Kcna3/Ank3/Hcn2/Kcnip3/Gal/Abcc8	20
GO:0032409	GO:0032409	BP	regulation of transporter activity	22/767	278/17943	0.00419719	0.11532	0.105566	Grm5/S100a1/Amigo1/Scn4b/Plcg2/Cox17/Scn2b/Shank2/Insr/Shank3/Dlg4/Homer1/Sumo1/Hap1/Nlgn2/Cacnb1/Shank1/Ank3/Chchd10/Gal/Abcc8/Trpc6	22
GO:2000058	GO:2000058	BP	regulation of ubiquitin-dependent protein catabolic process	14/767	147/17943	0.00421847	0.11532	0.105566	Rpl23/Il33/Arih1/Sufu/Bbs7/Ogt/Sumo1/Csnk1e/Dvl1/Rnf144a/Arih2/Stub1/Map1a/Uchl5	14
GO:0034219	GO:0034219	BP	carbohydrate transmembrane transport	13/767	132/17943	0.00430619	0.116647	0.106781	Rab8a/Insr/Slc23a2/Slc2a3/LOC100909595/Hk2/Tsc2/Trarg1/Ednra/Tsc1/Naglt1/Nfe2l2/Erbb4	13
GO:0043401	GO:0043401	BP	steroid hormone mediated signaling pathway	15/767	163/17943	0.00431416	0.116647	0.106781	Nr2c2/Carm1/Ppard/Ncoa2/Dnaaf4/Thrb/Clock/Paqr8/Rxra/Cry2/Thra/Rxrb/Ntrk2/Rbfox2/Ube2i	15
GO:0000460	GO:0000460	BP	maturation of 5.8S rRNA	5/767	26/17943	0.00438511	0.117284	0.107363	Wdr12/Pes1/Fcf1/Mtrex/Ftsj3	5
GO:0009065	GO:0009065	BP	glutamine family amino acid catabolic process	5/767	26/17943	0.00438511	0.117284	0.107363	Got2/Gls/Asrgl1/Nos3/Ddah2	5
GO:0031331	GO:0031331	BP	positive regulation of cellular catabolic process	27/767	367/17943	0.00445882	0.118458	0.108438	Insr/Il33/Hk2/Atxn3/Arih1/Tsc2/Psmc4/Bbs7/Ikbkg/Pip4k2b/Sumo1/Hnrnpd/Polr2g/Zfp36l2/Rnf40/Tsc1/Dab2ip/Csnk1e/Fbxo7/Dvl1/Rnf144a/Arih2/Tpcn1/Zfp36l1/Stub1/Dxo/Endog	27
GO:1901068	GO:1901068	BP	guanosine-containing compound metabolic process	6/767	37/17943	0.00447688	0.118458	0.108438	Nme1/Decr2/Nme4/Ak3/Nme3/Mocs2	6
GO:0030900	GO:0030900	BP	forebrain development	34/767	495/17943	0.00457148	0.119351	0.109256	Nme1/Creb1/Insr/Shank3/Slc2a3/Kirrel3/Grin1/Chrnb2/Mecp2/Cul5/Tacc1/Ak3/Sct/Ogt/Notch3/Hap1/Tsc1/Dab2ip/Cntn2/Ets1/Crk/Ndst1/Tyrobp/Pgap1/Igf1r/Tnr/Xrcc1/Ntrk2/Uchl5/Adgrg1/Uqcrq/Dclk1/Eif2b4/Erbb4	34
GO:0048813	GO:0048813	BP	dendrite morphogenesis	16/767	180/17943	0.00457973	0.119351	0.109256	Shank2/Shank3/Grin1/Chrnb2/Gorasp1/Dlg4/Ss18l1/Taok2/Shank1/Dvl1/Srcin1/Dclk1/Rbfox2/Tmem106b/Abi2/Trpc6	16
GO:0034764	GO:0034764	BP	positive regulation of transmembrane transport	20/767	246/17943	0.00458301	0.119351	0.109256	S100a1/Amigo1/Rab8a/Plcg2/Cx3cl1/Cox17/Insr/Shank3/Azin1/F2r/Sumo1/Hap1/Ednra/Ank3/Chchd10/Nfe2l2/Gal/Abcc8/Erbb4/Trpc6	20
GO:0032414	GO:0032414	BP	positive regulation of ion transmembrane transporter activity	12/767	119/17943	0.00494189	0.124915	0.114349	S100a1/Amigo1/Plcg2/Cox17/Shank3/Sumo1/Hap1/Ank3/Chchd10/Gal/Abcc8/Trpc6	12
GO:0032434	GO:0032434	BP	regulation of proteasomal ubiquitin-dependent protein catabolic process	12/767	119/17943	0.00494189	0.124915	0.114349	Il33/Arih1/Bbs7/Ogt/Sumo1/Csnk1e/Dvl1/Rnf144a/Arih2/Stub1/Map1a/Uchl5	12
GO:0031647	GO:0031647	BP	regulation of protein stability	22/767	282/17943	0.00496391	0.124915	0.114349	Rpl23/Creb1/Btrc/Ncln/Sumo1/Taf9b/Cct6a/Fam107a/Tsc1/Otud5/Fbxo7/Tyrobp/Cdkn2aip/Dvl1/Ppib/Saxol1/Qrsl1/Stub1/Tada2a/Lamp2/Cct2/Dpm2	22
GO:0006743	GO:0006743	BP	ubiquinone metabolic process	4/767	17/17943	0.00504911	0.124915	0.114349	Coq7/Coq2/Coq3/Coq4	4
GO:0009226	GO:0009226	BP	nucleotide-sugar biosynthetic process	4/767	17/17943	0.00504911	0.124915	0.114349	Gfpt1/Gmds/Uxs1/Pmm1	4
GO:0031958	GO:0031958	BP	corticosteroid receptor signaling pathway	4/767	17/17943	0.00504911	0.124915	0.114349	Ncoa2/Clock/Cry2/Ntrk2	4
GO:0043981	GO:0043981	BP	histone H4-K5 acetylation	4/767	17/17943	0.00504911	0.124915	0.114349	Ing4/Kat8/Ogt/Kansl3	4
GO:0043982	GO:0043982	BP	histone H4-K8 acetylation	4/767	17/17943	0.00504911	0.124915	0.114349	Ing4/Kat8/Ogt/Kansl3	4
GO:0051131	GO:0051131	BP	chaperone-mediated protein complex assembly	4/767	17/17943	0.00504911	0.124915	0.114349	Ptges3l1/Pfdn6/Stub1/Cct2	4
GO:0099638	GO:0099638	BP	endosome to plasma membrane protein transport	4/767	17/17943	0.00504911	0.124915	0.114349	Rab8a/Trarg1/Grip2/Rab11a	4
GO:0006733	GO:0006733	BP	oxidoreduction coenzyme metabolic process	15/767	166/17943	0.00510792	0.125741	0.115105	Insr/Coq7/Hk2/Coq2/Coq3/Pgam2/Ogt/Mpc2/Dcxr/Kif1b/Prdx5/Coq4/Aldoart2/Cyb5r4/Rpe	15
GO:1904861	GO:1904861	BP	excitatory synapse assembly	5/767	27/17943	0.00519555	0.127265	0.116501	Shank2/Shank3/Nlgn2/Shank1/Nrxn2	5
GO:1990542	GO:1990542	BP	mitochondrial transmembrane transport	9/767	77/17943	0.00545633	0.132995	0.121745	Grpel1/Sfxn3/Timm23/LOC100362432/Maip1/Timm17a/Mpc2/Tomm40l/Slc25a38	9
GO:0022898	GO:0022898	BP	regulation of transmembrane transporter activity	21/767	268/17943	0.00568046	0.137779	0.126125	Grm5/S100a1/Amigo1/Scn4b/Plcg2/Cox17/Scn2b/Shank2/Shank3/Dlg4/Homer1/Sumo1/Hap1/Nlgn2/Cacnb1/Shank1/Ank3/Chchd10/Gal/Abcc8/Trpc6	21
GO:0061951	GO:0061951	BP	establishment of protein localization to plasma membrane	8/767	64/17943	0.00573549	0.138435	0.126726	Gga1/Rab8a/Gorasp1/Trarg1/Grip2/Ank3/Rab11a/Arfrp1	8
GO:0051968	GO:0051968	BP	positive regulation of synaptic transmission, glutamatergic	6/767	39/17943	0.00584575	0.140412	0.128535	Shank2/Shank3/Nlgn2/Shank1/Tnr/Ntrk2	6
GO:0051966	GO:0051966	BP	regulation of synaptic transmission, glutamatergic	9/767	78/17943	0.00594049	0.141902	0.129899	Grm5/Adora1/Shank2/Shank3/Homer1/Nlgn2/Shank1/Tnr/Ntrk2	9
GO:0009152	GO:0009152	BP	purine ribonucleotide biosynthetic process	19/767	235/17943	0.00597299	0.141902	0.129899	Nme1/Atp5pd/Adcy6/Ak2/Insr/Hk2/Pgam2/Adcy5/Decr2/Nme4/Ak3/Ogt/Ak6/Pdk2/Mpc2/Aldoart2/Nme3/Paics/Dlat	19
GO:0009132	GO:0009132	BP	nucleoside diphosphate metabolic process	12/767	122/17943	0.006024	0.141902	0.129899	Nme1/Ak2/Insr/Hk2/Pgam2/Decr2/Nme4/Ak3/Ogt/Nudt9/Aldoart2/Nme3	12
GO:0035249	GO:0035249	BP	synaptic transmission, glutamatergic	11/767	107/17943	0.00603512	0.141902	0.129899	Grm5/Adora1/Shank2/Shank3/Grin1/Clstn3/Homer1/Nlgn2/Shank1/Tnr/Ntrk2	11
GO:0006836	GO:0006836	BP	neurotransmitter transport	24/767	322/17943	0.00605118	0.141902	0.129899	Slc38a7/Kcnj10/Chrnb2/Nrn1/Syt7/Slc36a1/Bace1/Ncs1/Prepl/Ednra/Syn1/Cyth1/Rims4/Apba1/Dvl1/Ica1/Sncg/Ntrk2/Slc6a1/Sv2c/Slc25a38/Abat/Rims1/Nrxn2	24
GO:0000303	GO:0000303	BP	response to superoxide	5/767	28/17943	0.00610647	0.142523	0.130467	Nqo1/Glrx2/Nos3/Ccs/Nfe2l2	5
GO:0009148	GO:0009148	BP	pyrimidine nucleoside triphosphate biosynthetic process	4/767	18/17943	0.00627511	0.14364	0.13149	Nme1/Decr2/Nme4/Nme3	4
GO:0072578	GO:0072578	BP	neurotransmitter-gated ion channel clustering	4/767	18/17943	0.00627511	0.14364	0.13149	Shank3/Lhfpl4/Grip2/Dlg4	4
GO:0051648	GO:0051648	BP	vesicle localization	22/767	288/17943	0.00632898	0.14364	0.13149	Actn4/Bloc1s2/Rasgrp1/Chrnb2/Shroom2/Mecp2/Nrn1/Syt7/Ikbkg/Bace1/Hap1/Ncs1/Prepl/Nlgn2/Syn1/Cyth1/Rims4/Kif1b/Apba1/Dvl1/Rab11a/Rims1	22
GO:0006497	GO:0006497	BP	protein lipidation	10/767	93/17943	0.00633105	0.14364	0.13149	Zdhhc5/Wdr45b/Ugcg/Pigu/Pigy/Abhd17b/Pgap1/Zdhhc20/Dpm2/Gpaa1	10
GO:0061572	GO:0061572	BP	actin filament bundle organization	15/767	170/17943	0.00634615	0.14364	0.13149	Actn4/Aif1/Cx3cl1/Shank3/Gas7/Synpo/Pxn/Arrb1/Fam107a/Tsc1/Shank1/Add3/Ppm1f/Pdlim4/Rflnb	15
GO:0008643	GO:0008643	BP	carbohydrate transport	14/767	154/17943	0.00635234	0.14364	0.13149	Rab8a/Insr/Slc23a2/Slc2a3/LOC100909595/Hk2/Tsc2/Trarg1/Ednra/Tsc1/Naglt1/Nfe2l2/Aqp9/Erbb4	14
GO:0007618	GO:0007618	BP	mating	7/767	52/17943	0.00635755	0.14364	0.13149	Ncoa2/Grin1/Thrb/Vgf/Ednra/Thra/Abat	7
GO:1990090	GO:1990090	BP	cellular response to nerve growth factor stimulus	9/767	79/17943	0.00645709	0.144809	0.13256	Rpl9/Creb1/Trpv1/Rps3/Csnk1e/Crk/Kif1b/Ntrk2/Dync1li2	9
GO:0051289	GO:0051289	BP	protein homotetramerization	11/767	108/17943	0.00646782	0.144809	0.13256	Srr/Gfpt1/Trpv1/Golga2/Kcnj10/Crtc1/Dctpp1/Gls/Dcxr/Rxra/Cbr4	11
GO:2001252	GO:2001252	BP	positive regulation of chromosome organization	16/767	187/17943	0.00658422	0.146751	0.134338	Chtop/Mre11a/Acd/Mecp2/L3mbtl2/Phf1/Arrb1/Map2k7/Ogt/Hnrnpd/Cct6a/Rnf40/Gata3/Paf1/Tada2a/Cct2	16
GO:1990573	GO:1990573	BP	potassium ion import across plasma membrane	6/767	40/17943	0.00663415	0.147201	0.13475	Kcnd3/Kcnj4/Kcnj10/Kcnj9/Slc12a5/Hcn2	6
GO:0009150	GO:0009150	BP	purine ribonucleotide metabolic process	31/767	452/17943	0.00672148	0.148067	0.135543	Nme1/Ndufs6/Atp5pd/Cox4i1/Adcy6/Uqcrh/Ak2/Insr/Coq7/Hk2/Pgam2/Cs/Mecp2/Adcy5/Decr2/Nme4/Ak3/Ogt/Nudt9/Ak6/Pdk2/Mpc2/Cox7a2/Aldoart2/Nme3/Chchd10/Paics/Dlat/Uqcrq/Mocs2/Hmgcs1	31
GO:0051224	GO:0051224	BP	negative regulation of protein transport	17/767	204/17943	0.00673306	0.148067	0.135543	Os9/Cyp51/Adtrp/Cx3cl1/Anxa5/Il33/Insig1/Yod1/Akap1/Txn1/Ogt/F2r/Otud5/Pkig/Srcin1/Ppm1f/Abcc8	17
GO:0046390	GO:0046390	BP	ribose phosphate biosynthetic process	20/767	255/17943	0.00677926	0.148424	0.135869	Nme1/Atp5pd/Adcy6/Ak2/Insr/Hk2/Pgam2/Prpsap1/Adcy5/Decr2/Nme4/Ak3/Ogt/Ak6/Pdk2/Mpc2/Aldoart2/Nme3/Paics/Dlat	20
GO:0006397	GO:0006397	BP	mRNA processing	28/767	398/17943	0.00697394	0.152013	0.139155	Carm1/Rbm39/LOC100910882/Casc3/Srek1/Adarb2/Prpf38b/Gemin6/Dazap1/Thrap3/Snrnp35/Sf3a2/Rnf40/Srek1ip1/RGD1305178/Ddx39a/Adar/Isy1/Zfp36l1/Psip1/Ncbp1/Paf1/Clasrp/Rbfox2/U2af1l4/Wdr83/Jmjd6/Dcps	28
GO:0032436	GO:0032436	BP	positive regulation of proteasomal ubiquitin-dependent protein catabolic process	9/767	80/17943	0.0070075	0.152075	0.139212	Il33/Arih1/Bbs7/Sumo1/Csnk1e/Dvl1/Rnf144a/Arih2/Stub1	9
GO:1903364	GO:1903364	BP	positive regulation of cellular protein catabolic process	13/767	140/17943	0.00704129	0.152141	0.139272	Il33/Atxn3/Arih1/Psmc4/Bbs7/Sumo1/Rnf40/Dab2ip/Csnk1e/Dvl1/Rnf144a/Arih2/Stub1	13
GO:0000305	GO:0000305	BP	response to oxygen radical	5/767	29/17943	0.007124	0.152982	0.140042	Nqo1/Glrx2/Nos3/Ccs/Nfe2l2	5
GO:0060359	GO:0060359	BP	response to ammonium ion	16/767	189/17943	0.00727129	0.152982	0.140042	Gabrb3/Aif1/Got2/Srr/Grin1/Chrnb2/Mecp2/Asl/Adcy5/Gabra1/Homer1/Hnrnpd/Ednra/Sncg/Slc6a1/Abat	16
GO:1904659	GO:1904659	BP	glucose transmembrane transport	12/767	125/17943	0.0072857	0.152982	0.140042	Rab8a/Insr/Slc2a3/LOC100909595/Hk2/Tsc2/Trarg1/Ednra/Tsc1/Naglt1/Nfe2l2/Erbb4	12
GO:0009743	GO:0009743	BP	response to carbohydrate	25/767	345/17943	0.00730169	0.152982	0.140042	Nme1/Ang2/Aacs/Gfpt1/Insr/Ppard/Slc2a3/Cdkn1b/Adcy5/Cacna1e/Txn1/Arrb1/Map2k7/Ogt/Hp/Hmbs/Mpc2/Nos3/Igf1r/Zfp36l1/Txn2/Slc6a1/Eif2b4/Selenot/Endog	25
GO:0015791	GO:0015791	BP	polyol transport	3/767	10/17943	0.00745122	0.152982	0.140042	Slc2a13/Pgap1/Aqp9	3
GO:0032328	GO:0032328	BP	alanine transport	3/767	10/17943	0.00745122	0.152982	0.140042	Slc38a7/Slc36a1/Slc1a4	3
GO:0032908	GO:0032908	BP	regulation of transforming growth factor beta1 production	3/767	10/17943	0.00745122	0.152982	0.140042	Cx3cl1/Furin/Tyrobp	3
GO:0051124	GO:0051124	BP	synaptic growth at neuromuscular junction	3/767	10/17943	0.00745122	0.152982	0.140042	Shank2/Shank3/Shank1	3
GO:0061085	GO:0061085	BP	regulation of histone H3-K27 methylation	3/767	10/17943	0.00745122	0.152982	0.140042	Phf1/Ogt/Gata3	3
GO:0070862	GO:0070862	BP	negative regulation of protein exit from endoplasmic reticulum	3/767	10/17943	0.00745122	0.152982	0.140042	Os9/Insig1/Yod1	3
GO:0099541	GO:0099541	BP	trans-synaptic signaling by lipid	3/767	10/17943	0.00745122	0.152982	0.140042	Grm5/Dagla/F2r	3
GO:0099542	GO:0099542	BP	trans-synaptic signaling by endocannabinoid	3/767	10/17943	0.00745122	0.152982	0.140042	Grm5/Dagla/F2r	3
GO:0046323	GO:0046323	BP	glucose import	9/767	81/17943	0.00759312	0.155251	0.142119	Rab8a/Insr/Slc2a3/Hk2/Tsc2/Trarg1/Tsc1/Nfe2l2/Erbb4	9
GO:0071636	GO:0071636	BP	positive regulation of transforming growth factor beta production	4/767	19/17943	0.00768367	0.156456	0.143222	Atf2/Cx3cl1/Creb1/Furin	4
GO:0008645	GO:0008645	BP	hexose transmembrane transport	12/767	126/17943	0.0077495	0.156508	0.14327	Rab8a/Insr/Slc2a3/LOC100909595/Hk2/Tsc2/Trarg1/Ednra/Tsc1/Naglt1/Nfe2l2/Erbb4	12
GO:0032411	GO:0032411	BP	positive regulation of transporter activity	12/767	126/17943	0.0077495	0.156508	0.14327	S100a1/Amigo1/Plcg2/Cox17/Shank3/Sumo1/Hap1/Ank3/Chchd10/Gal/Abcc8/Trpc6	12
GO:0006414	GO:0006414	BP	translational elongation	7/767	54/17943	0.00782165	0.157323	0.144016	Grm5/Trnau1ap/Rplp2/LOC100911575/Rplp1/LOC100360522/Mrpl44	7
GO:0007219	GO:0007219	BP	Notch signaling pathway	15/767	175/17943	0.00822149	0.161468	0.14781	Sel1l/Rps19/Gmds/Cdkn1b/Pgam2/Grip2/Wdr12/Llgl1/Arrb1/Notch3/Hp/Pofut1/Epn1/Jag1/Gata5	15
GO:2001257	GO:2001257	BP	regulation of cation channel activity	15/767	175/17943	0.00822149	0.161468	0.14781	S100a1/Amigo1/Plcg2/Shank2/Shank3/Dlg4/Homer1/Sumo1/Hap1/Nlgn2/Cacnb1/Shank1/Ank3/Gal/Abcc8	15
GO:0042752	GO:0042752	BP	regulation of circadian rhythm	12/767	127/17943	0.00823613	0.161468	0.14781	Creb1/Btrc/Adora1/Il18/Crem/Chrnb2/Clock/Thrap3/Crtc1/Hnrnpd/Csnk1e/Cry2	12
GO:0035025	GO:0035025	BP	positive regulation of Rho protein signal transduction	5/767	30/17943	0.00825414	0.161468	0.14781	Mcf2l/Arrb1/F2r/Gpr17/Adgrg1	5
GO:0008652	GO:0008652	BP	cellular amino acid biosynthetic process	8/767	68/17943	0.00825667	0.161468	0.14781	Got2/Srr/Asl/Gls/Enoph1/Mthfd1/Abat/Pycr2	8
GO:0015800	GO:0015800	BP	acidic amino acid transport	8/767	68/17943	0.00825667	0.161468	0.14781	Slc38a7/Adora1/Trpv1/Kcnj10/Apba1/Ntrk2/Slc6a1/Abat	8
GO:0099601	GO:0099601	BP	regulation of neurotransmitter receptor activity	8/767	68/17943	0.00825667	0.161468	0.14781	Shank2/Shank3/Nptxr/Begain/Dlg4/Homer1/Nlgn2/Shank1	8
GO:1901214	GO:1901214	BP	regulation of neuron death	27/767	385/17943	0.00828876	0.161468	0.14781	Gabrb3/Atf2/Cx3cl1/Creb1/Nqo1/Adora1/Il18/Ap2b1/Grin1/Mecp2/Syngap1/Arrb1/Map2k7/Mt1/Sct/F2r/Csf1/Bace1/Tsc1/Barhl1/Fbxo7/Amigo2/Tyrobp/Sncg/Kcnip3/Gata3/Ntrk2	27
GO:1904950	GO:1904950	BP	negative regulation of establishment of protein localization	17/767	209/17943	0.00849632	0.164218	0.150328	Os9/Cyp51/Adtrp/Cx3cl1/Anxa5/Il33/Insig1/Yod1/Akap1/Txn1/Ogt/F2r/Otud5/Pkig/Srcin1/Ppm1f/Abcc8	17
GO:2000377	GO:2000377	BP	regulation of reactive oxygen species metabolic process	17/767	209/17943	0.00849632	0.164218	0.150328	Aif1/Il18/Insr/Coq7/Trpv1/Mpv17/Hk2/Grin1/Klf2/Ogt/Hp/Shc1/Sirpa/Tyrobp/Nfe2l2/Ddah2/Nox1	17
GO:0071241	GO:0071241	BP	cellular response to inorganic substance	23/767	314/17943	0.00867966	0.166876	0.152761	Creb1/Nqo1/Anxa5/Cdkn1b/Grin1/Mecp2/Atp7b/Ncf1/Syt7/Dlg4/Mt1/Sumo1/Hnrnpd/Bace1/Krt10/Hmbs/Alox5ap/Nos3/Crk/Ank3/Dlg2/Nfe2l2/Endog	23
GO:0051271	GO:0051271	BP	negative regulation of cellular component movement	24/767	332/17943	0.00870131	0.166876	0.152761	Actn4/Aif1/Adtrp/Cx3cl1/Adora1/Il33/Ppard/Cdkn1b/Mecp2/Sema6b/Sema6c/Dab2ip/Igfbp5/Crk/Nfe2l2/Gata3/Svbp/Adipor1/Adgrg1/Jag1/Abcc8/Arhgdia/Map2k5/Erbb4	24
GO:0032869	GO:0032869	BP	cellular response to insulin stimulus	19/767	244/17943	0.00880231	0.168162	0.153938	Nucks1/Rab8a/Gfpt1/Insr/Insig1/Tsc2/Trarg1/Socs2/Ogt/Pdk2/Tsc1/Nos3/Shc1/Rxra/Igf1r/Zfp36l1/Adipor1/Cdk4/Eprs	19
GO:1990089	GO:1990089	BP	response to nerve growth factor	9/767	83/17943	0.00887558	0.168909	0.154622	Rpl9/Creb1/Trpv1/Rps3/Csnk1e/Crk/Kif1b/Ntrk2/Dync1li2	9
GO:0050885	GO:0050885	BP	neuromuscular process controlling balance	8/767	69/17943	0.00899967	0.169542	0.155202	Shank3/Cntnap1/Adcy5/Dlg4/Nlgn2/Shank1/Tnr/Rbfox2	8
GO:2000379	GO:2000379	BP	positive regulation of reactive oxygen species metabolic process	11/767	113/17943	0.009008	0.169542	0.155202	Aif1/Il18/Insr/Trpv1/Grin1/Klf2/Ogt/Tyrobp/Nfe2l2/Ddah2/Nox1	11
GO:0043270	GO:0043270	BP	positive regulation of ion transport	24/767	333/17943	0.00901166	0.169542	0.155202	S100a1/Amigo1/Scn4b/Plcg2/Cx3cl1/Cox17/Adora1/Shank3/Grin1/Chrnb2/Gnas/Homer1/F2r/Sumo1/Hap1/Ednra/Adcyap1r1/Ank3/Chchd10/Gal/Slc6a1/Abcc8/Abat/Trpc6	24
GO:0006691	GO:0006691	BP	leukotriene metabolic process	4/767	20/17943	0.00928515	0.172071	0.157516	Cyp4f6/Ncf1/Alox5ap/Cyp4f18	4
GO:0009220	GO:0009220	BP	pyrimidine ribonucleotide biosynthetic process	4/767	20/17943	0.00928515	0.172071	0.157516	Nme1/Decr2/Nme4/Nme3	4
GO:0046132	GO:0046132	BP	pyrimidine ribonucleoside biosynthetic process	4/767	20/17943	0.00928515	0.172071	0.157516	Nme1/Decr2/Nme4/Nme3	4
GO:0046134	GO:0046134	BP	pyrimidine nucleoside biosynthetic process	4/767	20/17943	0.00928515	0.172071	0.157516	Nme1/Decr2/Nme4/Nme3	4
GO:0021537	GO:0021537	BP	telencephalon development	24/767	334/17943	0.00933096	0.172275	0.157703	Nme1/Insr/Shank3/Slc2a3/Kirrel3/Grin1/Mecp2/Cul5/Tacc1/Ak3/Sct/Tsc1/Dab2ip/Cntn2/Crk/Igf1r/Tnr/Xrcc1/Ntrk2/Uchl5/Adgrg1/Uqcrq/Eif2b4/Erbb4	24
GO:0009225	GO:0009225	BP	nucleotide-sugar metabolic process	5/767	31/17943	0.00950267	0.174472	0.159714	Uggt1/Gfpt1/Gmds/Uxs1/Pmm1	5
GO:1903539	GO:1903539	BP	protein localization to postsynaptic membrane	7/767	56/17943	0.00952047	0.174472	0.159714	Rab8a/Nptxr/Grin1/Grip2/Dlg4/Rab11a/Dlg2	7
GO:0045471	GO:0045471	BP	response to ethanol	19/767	246/17943	0.00955834	0.174519	0.159757	Nqo1/Got2/Aacs/Insr/Spi1/Grin1/Chrnb2/Vhl/Sdf4/Ggh/Nos3/Rxra/Rps4x/Adcyap1r1/Rpl10a/Igf1r/Gata3/Rps2/Abat	19
GO:2000300	GO:2000300	BP	regulation of synaptic vesicle exocytosis	11/767	114/17943	0.00959759	0.174591	0.159824	Chrnb2/Nrn1/Syt7/Bace1/Ncs1/Prepl/Cyth1/Rims4/Apba1/Dvl1/Rims1	11
GO:0042158	GO:0042158	BP	lipoprotein biosynthetic process	10/767	99/17943	0.0097287	0.175358	0.160525	Zdhhc5/Wdr45b/Ugcg/Pigu/Pigy/Abhd17b/Pgap1/Zdhhc20/Dpm2/Gpaa1	10
GO:0016573	GO:0016573	BP	histone acetylation	14/767	162/17943	0.00976548	0.175358	0.160525	Atf2/Ing4/Spi1/Kat8/Mecp2/L3mbtl2/Clock/Arrb1/Ogt/Taf9b/Kansl3/Brca2/Gata3/Tada2a	14
GO:0043113	GO:0043113	BP	receptor clustering	8/767	70/17943	0.00979146	0.175358	0.160525	Shank3/Lhfpl4/Grip2/Dlg4/Syngap1/Dvl1/Dlg2/Nrxn2	8
GO:0042177	GO:0042177	BP	negative regulation of protein catabolic process	12/767	130/17943	0.00984041	0.175358	0.160525	Os9/Cyp51/Rpl23/Furin/Azin1/Yod1/Sufu/Ogt/Dab2ip/Gabarapl2/Map1a/Uchl5	12
GO:0032905	GO:0032905	BP	transforming growth factor beta1 production	3/767	11/17943	0.00992324	0.175358	0.160525	Cx3cl1/Furin/Tyrobp	3
GO:0036093	GO:0036093	BP	germ cell proliferation	3/767	11/17943	0.00992324	0.175358	0.160525	Il18/Eif2s2/Larp7	3
GO:0060180	GO:0060180	BP	female mating behavior	3/767	11/17943	0.00992324	0.175358	0.160525	Ncoa2/Thrb/Thra	3
GO:0097113	GO:0097113	BP	AMPA glutamate receptor clustering	3/767	11/17943	0.00992324	0.175358	0.160525	Shank3/Grip2/Dlg4	3
GO:0072329	GO:0072329	BP	monocarboxylic acid catabolic process	11/767	115/17943	0.0102165	0.178837	0.16371	Hibch/Adtrp/Faahl/Eci2/Ppard/Hadhb/Abhd1/Eci1/Asrgl1/Cyp4f18/Abat	11
GO:0010608	GO:0010608	BP	posttranscriptional regulation of gene expression	32/767	485/17943	0.0102351	0.178837	0.16371	Rps23/Grm5/Rida/Eif5/Casc3/Trnau1ap/Mecp2/Rplp2/Thrap3/Hnrnpd/Polr2g/Rps3/Ncl/Mknk2/Mif4gd/Zfp36l2/Tsc1/Igfbp5/Fastkd3/Rxra/Rps4x/Adar/Cnot10/Eif4e/Zfp36l1/Rplp1/Ncbp1/Fxr1/Mrpl44/Cdk4/Dxo/Eprs	32
GO:1990845	GO:1990845	BP	adaptive thermogenesis	14/767	163/17943	0.0102777	0.178837	0.16371	Il4r/Il18/Trpv1/Tle3/G0s2/Gnas/Sct/Ogt/Ip6k1/Thra/Igf1r/Adipor1/Npr3/Arrdc3	14
GO:0009205	GO:0009205	BP	purine ribonucleoside triphosphate metabolic process	21/767	283/17943	0.0102873	0.178837	0.16371	Nme1/Ndufs6/Atp5pd/Cox4i1/Uqcrh/Ak2/Insr/Coq7/Hk2/Pgam2/Mecp2/Decr2/Nme4/Ak3/Ogt/Cox7a2/Aldoart2/Nme3/Chchd10/Uqcrq/Mocs2	21
GO:0009260	GO:0009260	BP	ribonucleotide biosynthetic process	19/767	248/17943	0.0103656	0.178837	0.16371	Nme1/Atp5pd/Adcy6/Ak2/Insr/Hk2/Pgam2/Adcy5/Decr2/Nme4/Ak3/Ogt/Ak6/Pdk2/Mpc2/Aldoart2/Nme3/Paics/Dlat	19
GO:0009165	GO:0009165	BP	nucleotide biosynthetic process	23/767	319/17943	0.0103731	0.178837	0.16371	Nme1/Atp5pd/Adcy6/Ak2/Insr/Hk2/Pgam2/Prpsap1/Adcy5/Decr2/Nme4/Ak3/Ogt/Ak6/Pdk2/Mpc2/Nos3/Cdadc1/Aldoart2/Nme3/Paics/Dlat/Mthfd1	23
GO:0042593	GO:0042593	BP	glucose homeostasis	23/767	319/17943	0.0103731	0.178837	0.16371	Nme1/Nucks1/Rab8a/Ang2/Aacs/Insr/Hk2/Adcy5/Cacna1e/Txn1/Arrb1/Ogt/Vgf/Pdk2/Igfbp5/Mpc2/Cry2/Igf1r/Cyb5r4/Adipor1/Abcc8/Selenot/Endog	23
GO:0006584	GO:0006584	BP	catecholamine metabolic process	7/767	57/17943	0.0104642	0.178957	0.16382	Sult1d1/Mtpn/Chrnb2/Pde1b/Vhl/Gata3/Abat	7
GO:0009712	GO:0009712	BP	catechol-containing compound metabolic process	7/767	57/17943	0.0104642	0.178957	0.16382	Sult1d1/Mtpn/Chrnb2/Pde1b/Vhl/Gata3/Abat	7
GO:0009259	GO:0009259	BP	ribonucleotide metabolic process	31/767	467/17943	0.0104886	0.178957	0.16382	Nme1/Ndufs6/Atp5pd/Cox4i1/Adcy6/Uqcrh/Ak2/Insr/Coq7/Hk2/Pgam2/Cs/Mecp2/Adcy5/Decr2/Nme4/Ak3/Ogt/Nudt9/Ak6/Pdk2/Mpc2/Cox7a2/Aldoart2/Nme3/Chchd10/Paics/Dlat/Uqcrq/Mocs2/Hmgcs1	31
GO:0031062	GO:0031062	BP	positive regulation of histone methylation	6/767	44/17943	0.010568	0.179693	0.164493	Chtop/Mecp2/L3mbtl2/Phf1/Ogt/Paf1	6
GO:0033500	GO:0033500	BP	carbohydrate homeostasis	23/767	320/17943	0.0107419	0.182024	0.166628	Nme1/Nucks1/Rab8a/Ang2/Aacs/Insr/Hk2/Adcy5/Cacna1e/Txn1/Arrb1/Ogt/Vgf/Pdk2/Igfbp5/Mpc2/Cry2/Igf1r/Cyb5r4/Adipor1/Abcc8/Selenot/Endog	23
GO:0003016	GO:0003016	BP	respiratory system process	5/767	32/17943	0.0108752	0.183029	0.167547	Adora1/Mecp2/Gls/Nlgn2/Stk40	5
GO:0071709	GO:0071709	BP	membrane assembly	5/767	32/17943	0.0108752	0.183029	0.167547	Tlcd1/Ugcg/Nlgn2/Ank3/Nrxn2	5
GO:0046928	GO:0046928	BP	regulation of neurotransmitter secretion	13/767	148/17943	0.0110002	0.184506	0.168899	Chrnb2/Nrn1/Syt7/Bace1/Ncs1/Prepl/Cyth1/Rims4/Apba1/Dvl1/Sncg/Ntrk2/Rims1	13
GO:0000466	GO:0000466	BP	maturation of 5.8S rRNA from tricistronic rRNA transcript (SSU-rRNA, 5.8S rRNA, LSU-rRNA)	4/767	21/17943	0.011089	0.185056	0.169403	Wdr12/Pes1/Fcf1/Ftsj3	4
GO:0009108	GO:0009108	BP	coenzyme biosynthetic process	16/767	198/17943	0.0111078	0.185056	0.169403	Insr/Coq7/Hk2/Coq2/Coq3/Pgam2/Ogt/Ak6/Pdk2/Mpc2/Pdxk/Coq4/Aldoart2/Dlat/Mthfd1/Mocs2	16
GO:0031503	GO:0031503	BP	protein-containing complex localization	19/767	250/17943	0.0112265	0.186406	0.170638	Rab8a/Chtop/Ap2b1/Tub/Nptxr/Grip2/Pip5k1c/Ift46/Dlg4/Hap1/Tsc1/Rps15/Ddx39a/Tyrobp/Fyttd1/Rab11a/Nup107/Dlg2/Ncbp1	19
GO:0032507	GO:0032507	BP	maintenance of protein location in cell	8/767	72/17943	0.0115287	0.190147	0.174063	Os9/Adcy6/Insig1/Hk2/Txn1/Pip5k1c/Shank1/Ank3	8
GO:1903051	GO:1903051	BP	negative regulation of proteolysis involved in cellular protein catabolic process	8/767	72/17943	0.0115287	0.190147	0.174063	Os9/Rpl23/Yod1/Sufu/Ogt/Gabarapl2/Map1a/Uchl5	8
GO:0010107	GO:0010107	BP	potassium ion import	6/767	45/17943	0.0117648	0.191368	0.175181	Kcnd3/Kcnj4/Kcnj10/Kcnj9/Slc12a5/Hcn2	6
GO:0060416	GO:0060416	BP	response to growth hormone	6/767	45/17943	0.0117648	0.191368	0.175181	Pxn/Asl/Socs2/Hp/Igfbp5/Gdf15	6
GO:0051650	GO:0051650	BP	establishment of vesicle localization	20/767	269/17943	0.0118384	0.191368	0.175181	Actn4/Bloc1s2/Rasgrp1/Chrnb2/Shroom2/Mecp2/Nrn1/Syt7/Ikbkg/Bace1/Hap1/Ncs1/Prepl/Cyth1/Rims4/Kif1b/Apba1/Dvl1/Rab11a/Rims1	20
GO:0000956	GO:0000956	BP	nuclear-transcribed mRNA catabolic process	10/767	102/17943	0.0118776	0.191368	0.175181	Casc3/Thrap3/Hnrnpd/Polr2g/Zfp36l2/Etf1/Zfp36l1/Ncbp1/Dxo/Dcps	10
GO:0031058	GO:0031058	BP	positive regulation of histone modification	10/767	102/17943	0.0118776	0.191368	0.175181	Chtop/Mecp2/L3mbtl2/Phf1/Arrb1/Ogt/Rnf40/Gata3/Paf1/Tada2a	10
GO:0021543	GO:0021543	BP	pallium development	18/767	234/17943	0.0119065	0.191368	0.175181	Nme1/Insr/Slc2a3/Kirrel3/Grin1/Mecp2/Cul5/Tacc1/Sct/Tsc1/Dab2ip/Crk/Igf1r/Xrcc1/Ntrk2/Adgrg1/Uqcrq/Eif2b4	18
GO:0071356	GO:0071356	BP	cellular response to tumor necrosis factor	18/767	234/17943	0.0119065	0.191368	0.175181	Actn4/Cx3cl1/Il18/Spata2/Asah1/Trpv1/Arhgef2/Asl/Sharpin/Klf2/Rps3/Zfp36l2/Dab2ip/Nos3/Zfp36l1/Nfe2l2/Gata3/Ntrk2	18
GO:1901293	GO:1901293	BP	nucleoside phosphate biosynthetic process	23/767	323/17943	0.0119121	0.191368	0.175181	Nme1/Atp5pd/Adcy6/Ak2/Insr/Hk2/Pgam2/Prpsap1/Adcy5/Decr2/Nme4/Ak3/Ogt/Ak6/Pdk2/Mpc2/Nos3/Cdadc1/Aldoart2/Nme3/Paics/Dlat/Mthfd1	23
GO:1902803	GO:1902803	BP	regulation of synaptic vesicle transport	11/767	118/17943	0.0122579	0.193939	0.177535	Chrnb2/Nrn1/Syt7/Bace1/Ncs1/Prepl/Cyth1/Rims4/Apba1/Dvl1/Rims1	11
GO:0017148	GO:0017148	BP	negative regulation of translation	12/767	134/17943	0.0123444	0.193939	0.177535	Rida/Hnrnpd/Rps3/Ncl/Zfp36l2/Tsc1/Igfbp5/Cnot10/Eif4e/Zfp36l1/Fxr1/Eprs	12
GO:0050905	GO:0050905	BP	neuromuscular process	12/767	134/17943	0.0123444	0.193939	0.177535	Shank3/Cntnap1/Grin1/Mecp2/Adcy5/Dlg4/Bace1/Nlgn2/Shank1/Dvl1/Tnr/Rbfox2	12
GO:0072347	GO:0072347	BP	response to anesthetic	12/767	134/17943	0.0123444	0.193939	0.177535	Aif1/Got2/Srr/Grin1/Chrnb2/Mecp2/Adcy5/Homer1/Ednra/Sncg/Slc6a1/Abat	12
GO:0006506	GO:0006506	BP	GPI anchor biosynthetic process	5/767	33/17943	0.012377	0.193939	0.177535	Pigu/Pigy/Pgap1/Dpm2/Gpaa1	5
GO:0048384	GO:0048384	BP	retinoic acid receptor signaling pathway	5/767	33/17943	0.012377	0.193939	0.177535	Actn4/Tgif1/Crem/Rxra/Rxrb	5
GO:0018393	GO:0018393	BP	internal peptidyl-lysine acetylation	14/767	167/17943	0.0125402	0.193939	0.177535	Atf2/Ing4/Spi1/Kat8/Mecp2/L3mbtl2/Clock/Arrb1/Ogt/Taf9b/Kansl3/Brca2/Gata3/Tada2a	14
GO:0051017	GO:0051017	BP	actin filament bundle assembly	14/767	167/17943	0.0125402	0.193939	0.177535	Actn4/Aif1/Cx3cl1/Shank3/Gas7/Synpo/Pxn/Arrb1/Fam107a/Tsc1/Shank1/Add3/Ppm1f/Pdlim4	14
GO:0009247	GO:0009247	BP	glycolipid biosynthetic process	7/767	59/17943	0.0125528	0.193939	0.177535	Ugcg/Pigu/Pigy/Pgap1/Dpm2/B3galt4/Gpaa1	7
GO:0007215	GO:0007215	BP	glutamate receptor signaling pathway	10/767	103/17943	0.012668	0.193939	0.177535	Grm5/Cx3cl1/Shank2/Dagla/Shank3/Grin1/Dlg4/Homer1/Nlgn2/Shank1	10
GO:0045185	GO:0045185	BP	maintenance of protein location	10/767	103/17943	0.012668	0.193939	0.177535	Os9/Adcy6/Insig1/Hk2/Sufu/Txn1/Pip5k1c/Shank1/Thra/Ank3	10
GO:0006086	GO:0006086	BP	acetyl-CoA biosynthetic process from pyruvate	3/767	12/17943	0.0128159	0.193939	0.177535	Pdk2/Mpc2/Dlat	3
GO:0048548	GO:0048548	BP	regulation of pinocytosis	3/767	12/17943	0.0128159	0.193939	0.177535	Actn4/Tsc2/Prom2	3
GO:0090161	GO:0090161	BP	Golgi ribbon formation	3/767	12/17943	0.0128159	0.193939	0.177535	Vti1a/Golga2/Tmed5	3
GO:0097688	GO:0097688	BP	glutamate receptor clustering	3/767	12/17943	0.0128159	0.193939	0.177535	Shank3/Grip2/Dlg4	3
GO:0098887	GO:0098887	BP	neurotransmitter receptor transport, endosome to postsynaptic membrane	3/767	12/17943	0.0128159	0.193939	0.177535	Rab8a/Grip2/Rab11a	3
GO:1900272	GO:1900272	BP	negative regulation of long-term synaptic potentiation	3/767	12/17943	0.0128159	0.193939	0.177535	Adora1/Fam107a/Tyrobp	3
GO:1905214	GO:1905214	BP	regulation of RNA binding	3/767	12/17943	0.0128159	0.193939	0.177535	Nucks1/Carm1/Ncbp1	3
GO:0009199	GO:0009199	BP	ribonucleoside triphosphate metabolic process	21/767	289/17943	0.0128169	0.193939	0.177535	Nme1/Ndufs6/Atp5pd/Cox4i1/Uqcrh/Ak2/Insr/Coq7/Hk2/Pgam2/Mecp2/Decr2/Nme4/Ak3/Ogt/Cox7a2/Aldoart2/Nme3/Chchd10/Uqcrq/Mocs2	21
GO:0097305	GO:0097305	BP	response to alcohol	29/767	437/17943	0.013059	0.194127	0.177707	Fosl1/Adcy6/Nqo1/Got2/Aacs/Insr/Spi1/Grin1/Chrnb2/Lmnb1/Vhl/Adcy5/Klf2/Gnas/Sdf4/Hnrnpd/Ggh/Nos3/Rxra/Rps4x/Adcyap1r1/Rpl10a/Igf1r/Hcn2/Gata3/Cdk4/Rps2/Abat/Hmgcs1	29
GO:0006541	GO:0006541	BP	glutamine metabolic process	4/767	22/17943	0.013104	0.194127	0.177707	Gfpt1/Mecp2/Asl/Gls	4
GO:0006907	GO:0006907	BP	pinocytosis	4/767	22/17943	0.013104	0.194127	0.177707	Actn4/Tsc2/Prom2/Mapkapk3	4
GO:0019430	GO:0019430	BP	removal of superoxide radicals	4/767	22/17943	0.013104	0.194127	0.177707	Nqo1/Nos3/Ccs/Nfe2l2	4
GO:0042069	GO:0042069	BP	regulation of catecholamine metabolic process	4/767	22/17943	0.013104	0.194127	0.177707	Chrnb2/Pde1b/Vhl/Abat	4
GO:0042451	GO:0042451	BP	purine nucleoside biosynthetic process	4/767	22/17943	0.013104	0.194127	0.177707	Nme1/Decr2/Nme4/Nme3	4
GO:0046129	GO:0046129	BP	purine ribonucleoside biosynthetic process	4/767	22/17943	0.013104	0.194127	0.177707	Nme1/Decr2/Nme4/Nme3	4
GO:0006650	GO:0006650	BP	glycerophospholipid metabolic process	18/767	237/17943	0.0134312	0.198381	0.181601	Pip4p1/Chpt1/Plcg2/Abhd12/Inpp4a/Mecp2/Pigu/Socs2/Pigy/Pip5k1c/Pip4k2b/Pcyt1a/Ip6k1/Pgap1/Tmem150a/Pdgfa/Dpm2/Gpaa1	18
GO:0034249	GO:0034249	BP	negative regulation of cellular amide metabolic process	13/767	152/17943	0.0135383	0.199367	0.182504	Rida/Hnrnpd/Rps3/Hap1/Ncl/Zfp36l2/Tsc1/Igfbp5/Cnot10/Eif4e/Zfp36l1/Fxr1/Eprs	13
GO:0051188	GO:0051188	BP	cofactor biosynthetic process	19/767	255/17943	0.0136292	0.199982	0.183066	Insr/Coq7/Hk2/Coq2/Coq3/Pgam2/Ncf1/Ogt/Ak6/Hmbs/Pdk2/Mpc2/Pdxk/Coq4/Aldoart2/Nfe2l2/Dlat/Mthfd1/Mocs2	19
GO:0014072	GO:0014072	BP	response to isoquinoline alkaloid	7/767	60/17943	0.0137025	0.199982	0.183066	Aif1/Got2/Srr/Grin1/Mecp2/Adcy5/Ednra	7
GO:0043523	GO:0043523	BP	regulation of neuron apoptotic process	20/767	273/17943	0.0137349	0.199982	0.183066	Gabrb3/Atf2/Cx3cl1/Nqo1/Il18/Grin1/Mecp2/Syngap1/Arrb1/Map2k7/Mt1/Sct/F2r/Bace1/Barhl1/Amigo2/Tyrobp/Kcnip3/Gata3/Ntrk2	20
GO:0009144	GO:0009144	BP	purine nucleoside triphosphate metabolic process	21/767	291/17943	0.0137623	0.199982	0.183066	Nme1/Ndufs6/Atp5pd/Cox4i1/Uqcrh/Ak2/Insr/Coq7/Hk2/Pgam2/Mecp2/Decr2/Nme4/Ak3/Ogt/Cox7a2/Aldoart2/Nme3/Chchd10/Uqcrq/Mocs2	21
GO:0046474	GO:0046474	BP	glycerophospholipid biosynthetic process	11/767	120/17943	0.0137821	0.199982	0.183066	Chpt1/Plcg2/Inpp4a/Pigu/Pigy/Pip5k1c/Pcyt1a/Pgap1/Pdgfa/Dpm2/Gpaa1	11
GO:0034767	GO:0034767	BP	positive regulation of ion transmembrane transport	15/767	186/17943	0.013896	0.201046	0.18404	S100a1/Amigo1/Plcg2/Cx3cl1/Cox17/Shank3/F2r/Sumo1/Hap1/Ednra/Ank3/Chchd10/Gal/Abcc8/Trpc6	15
GO:0006739	GO:0006739	BP	NADP metabolic process	5/767	34/17943	0.0140133	0.201564	0.184515	Dcxr/Kif1b/Prdx5/Cyb5r4/Rpe	5
GO:0017085	GO:0017085	BP	response to insecticide	5/767	34/17943	0.0140133	0.201564	0.184515	Uba52/Scn2b/Nos3/Kif1b/Pdxk	5
GO:0001505	GO:0001505	BP	regulation of neurotransmitter levels	27/767	402/17943	0.0140664	0.20174	0.184676	Aif1/Dagla/Insr/Trpv1/Kcnj10/Chrnb2/Pde1b/Klf2/Nrn1/Syt7/Bace1/Ncs1/Prepl/Syn1/Cyth1/Nos3/Rims4/Sirpa/Apba1/Dvl1/Sncg/Ntrk2/Slc6a1/Abat/Ddah2/Rims1/Nrxn2	27
GO:0009141	GO:0009141	BP	nucleoside triphosphate metabolic process	22/767	310/17943	0.0141996	0.203062	0.185886	Nme1/Ndufs6/Atp5pd/Cox4i1/Uqcrh/Ak2/Insr/Coq7/Hk2/Pgam2/Mecp2/Decr2/Nme4/Ak3/Dctpp1/Ogt/Cox7a2/Aldoart2/Nme3/Chchd10/Uqcrq/Mocs2	22
GO:0008089	GO:0008089	BP	anterograde axonal transport	6/767	47/17943	0.0144387	0.205252	0.18789	Bloc1s2/Mecp2/Hap1/Kif1b/Dlg2/Map1a	6
GO:0006475	GO:0006475	BP	internal protein amino acid acetylation	14/767	170/17943	0.0144771	0.205252	0.18789	Atf2/Ing4/Spi1/Kat8/Mecp2/L3mbtl2/Clock/Arrb1/Ogt/Taf9b/Kansl3/Brca2/Gata3/Tada2a	14
GO:1904064	GO:1904064	BP	positive regulation of cation transmembrane transport	14/767	170/17943	0.0144771	0.205252	0.18789	S100a1/Amigo1/Plcg2/Cx3cl1/Cox17/Shank3/F2r/Sumo1/Hap1/Ednra/Ank3/Chchd10/Gal/Abcc8	14
GO:0046942	GO:0046942	BP	carboxylic acid transport	23/767	329/17943	0.0145591	0.205484	0.188103	Slc38a7/Got2/Adora1/Slc23a2/Ppard/Trpv1/Kcnj10/Slc36a1/Sfxn3/Slc7a5/Abcb11/Mpc2/Slc7a1/Apba1/Slc1a4/RGD1305807/Abcc3/Ntrk2/Aqp9/Slc6a1/Slc25a38/Abat/Eprs	23
GO:0006091	GO:0006091	BP	generation of precursor metabolites and energy	28/767	422/17943	0.0145766	0.205484	0.188103	Cox6c/Ndufs6/Cox4i1/Cox17/Nqo1/Ppp1r3c/Uqcrh/Ak2/Gfpt1/Insr/Coq7/Hk2/Pgam2/Cs/Mecp2/Gnas/Glrx2/Ogt/Vgf/Stk40/Fastkd3/Cox7a2/Cox7a2l2/Aldoart2/Chchd10/Cyb5r4/Dlat/Uqcrq	28
GO:0015849	GO:0015849	BP	organic acid transport	23/767	330/17943	0.0150425	0.21145	0.193564	Slc38a7/Got2/Adora1/Slc23a2/Ppard/Trpv1/Kcnj10/Slc36a1/Sfxn3/Slc7a5/Abcb11/Mpc2/Slc7a1/Apba1/Slc1a4/RGD1305807/Abcc3/Ntrk2/Aqp9/Slc6a1/Slc25a38/Abat/Eprs	23
GO:0001659	GO:0001659	BP	temperature homeostasis	15/767	188/17943	0.0151938	0.21258	0.194599	Il4r/Adora1/Il18/Trpv1/Tle3/G0s2/Gnas/Ogt/Ip6k1/Thra/Igf1r/Adipor1/Abat/Npr3/Arrdc3	15
GO:0040013	GO:0040013	BP	negative regulation of locomotion	24/767	349/17943	0.015325	0.21258	0.194599	Grm5/Aif1/Adtrp/Cx3cl1/Adora1/Il33/Ppard/Mecp2/Sema6b/Sema6c/Dab2ip/Igfbp5/Crk/Nfe2l2/Gata3/Svbp/Adipor1/Adgrg1/Jag1/Abcc8/Arhgdia/Map2k5/Arrdc3/Erbb4	24
GO:0042178	GO:0042178	BP	xenobiotic catabolic process	4/767	23/17943	0.0153377	0.21258	0.194599	Gstm5/Gstm3/Gsta1/LOC108348061	4
GO:0071280	GO:0071280	BP	cellular response to copper ion	4/767	23/17943	0.0153377	0.21258	0.194599	Atp7b/Mt1/Bace1/Nfe2l2	4
GO:0099170	GO:0099170	BP	postsynaptic modulation of chemical synaptic transmission	4/767	23/17943	0.0153377	0.21258	0.194599	Grm5/Synpo/Vhl/Eif4e	4
GO:0060996	GO:0060996	BP	dendritic spine development	11/767	122/17943	0.0154453	0.213474	0.195417	Shank2/Shank3/Tsc2/Mecp2/Slc12a5/Dlg4/Nlgn2/Shank1/Dvl1/Srcin1/Abi2	11
GO:2000060	GO:2000060	BP	positive regulation of ubiquitin-dependent protein catabolic process	9/767	91/17943	0.0156946	0.215216	0.197012	Il33/Arih1/Bbs7/Sumo1/Csnk1e/Dvl1/Rnf144a/Arih2/Stub1	9
GO:0006865	GO:0006865	BP	amino acid transport	13/767	155/17943	0.01572	0.215216	0.197012	Slc38a7/Adora1/Trpv1/Kcnj10/Slc36a1/Slc7a5/Slc7a1/Apba1/Slc1a4/Ntrk2/Slc6a1/Slc25a38/Abat	13
GO:0021761	GO:0021761	BP	limbic system development	13/767	155/17943	0.01572	0.215216	0.197012	Nme1/Insr/Kirrel3/Mecp2/Sct/Hap1/Tsc1/Ets1/Crk/Igf1r/Xrcc1/Uqcrq/Eif2b4	13
GO:0006084	GO:0006084	BP	acetyl-CoA metabolic process	5/767	35/17943	0.0157889	0.215216	0.197012	Cs/Pdk2/Mpc2/Dlat/Hmgcs1	5
GO:0006505	GO:0006505	BP	GPI anchor metabolic process	5/767	35/17943	0.0157889	0.215216	0.197012	Pigu/Pigy/Pgap1/Dpm2/Gpaa1	5
GO:0001973	GO:0001973	BP	adenosine receptor signaling pathway	3/767	13/17943	0.0161391	0.218187	0.199732	Adora1/Adcy5/Cntn2	3
GO:0099639	GO:0099639	BP	neurotransmitter receptor transport, endosome to plasma membrane	3/767	13/17943	0.0161391	0.218187	0.199732	Rab8a/Grip2/Rab11a	3
GO:1902950	GO:1902950	BP	regulation of dendritic spine maintenance	3/767	13/17943	0.0161391	0.218187	0.199732	Grin1/Homer1/Abhd17b	3
GO:0099572	GO:0099572	CC	postsynaptic specialization	53/783	452/18437	2.05218e-11	1.219e-08	9.74247e-09	Grm5/Rps25/Rps13/Gabrb3/Rpl23/Rab8a/Rpl14/Rps14/Rps27/Dlgap3/Adora1/Shank2/Kcnd3/Shank3/Ncoa2/Synpo/Rnf112/Arhgef2/Tsc2/Grin1/Chrnb2/Adgrl1/Sharpin/Gabra1/Grip2/Pip5k1c/Dlg4/Syngap1/Crtc1/Clstn3/Arrb1/Homer1/Cap2/Abhd17b/Rps3/Ncs1/Nlgn2/Syn1/Tsc1/Shank1/Add3/Map4/Rpl10a/Dvl1/Srcin1/Dlg2/Map1a/Fxr1/Ntrk2/Dclk1/Klhl17/Rims1/Erbb4	53
GO:0098984	GO:0098984	CC	neuron to neuron synapse	51/783	445/18437	1.14221e-10	3.39238e-08	2.71126e-08	Grm5/Rps25/Rps13/Rpl23/Rab8a/Rpl14/Rps14/Rps27/Dlgap3/Adora1/Shank2/Shank3/Ncoa2/Synpo/Rnf112/Arhgef2/Tsc2/Grin1/Adgrl1/Sharpin/Syt7/Grip2/Pip5k1c/Dlg4/Syngap1/Crtc1/Clstn3/Arrb1/Homer1/Cap2/Abhd17b/Bace1/Rps3/Ncs1/Syn1/Tsc1/Shank1/Add3/Map4/Rpl10a/Dvl1/Tnr/Srcin1/Dlg2/Map1a/Fxr1/Ntrk2/Dclk1/Klhl17/Rims1/Erbb4	51
GO:0014069	GO:0014069	CC	postsynaptic density	48/783	417/18437	3.52154e-10	6.11894e-08	4.89038e-08	Grm5/Rps25/Rps13/Rpl23/Rab8a/Rpl14/Rps14/Rps27/Dlgap3/Adora1/Shank2/Shank3/Ncoa2/Synpo/Rnf112/Arhgef2/Tsc2/Grin1/Adgrl1/Sharpin/Grip2/Pip5k1c/Dlg4/Syngap1/Crtc1/Clstn3/Arrb1/Homer1/Cap2/Abhd17b/Rps3/Ncs1/Syn1/Tsc1/Shank1/Add3/Map4/Rpl10a/Dvl1/Srcin1/Dlg2/Map1a/Fxr1/Ntrk2/Dclk1/Klhl17/Rims1/Erbb4	48
GO:0032279	GO:0032279	CC	asymmetric synapse	48/783	421/18437	4.87173e-10	6.11894e-08	4.89038e-08	Grm5/Rps25/Rps13/Rpl23/Rab8a/Rpl14/Rps14/Rps27/Dlgap3/Adora1/Shank2/Shank3/Ncoa2/Synpo/Rnf112/Arhgef2/Tsc2/Grin1/Adgrl1/Sharpin/Grip2/Pip5k1c/Dlg4/Syngap1/Crtc1/Clstn3/Arrb1/Homer1/Cap2/Abhd17b/Rps3/Ncs1/Syn1/Tsc1/Shank1/Add3/Map4/Rpl10a/Dvl1/Srcin1/Dlg2/Map1a/Fxr1/Ntrk2/Dclk1/Klhl17/Rims1/Erbb4	48
GO:0097060	GO:0097060	CC	synaptic membrane	53/783	493/18437	5.15063e-10	6.11894e-08	4.89038e-08	Grm5/Gabrb3/Fosl1/Dlgap3/Cadm3/Adora1/Shank2/Dagla/Kcnd3/Shank3/Trpv1/Cntnap1/Akap1/Slc2a3/LOC100909595/Synpo/Rnf112/Kcnj4/Kcnj9/Grin1/Chrnb2/Adgrl1/Cacna1e/Gabra1/Lhfpl4/Syt7/Grip2/Pip5k1c/Dlg4/Clstn3/Arrb1/Homer1/F2r/Abhd17b/Ncs1/Nlgn2/Shank1/Cyth1/Cntn2/Rims4/Kcna3/Apba1/Ank3/Epn1/Srcin1/Dlg2/Pdlim4/Ntrk2/Slc6a1/Klhl17/Gabbr2/Rims1/Erbb4	53
GO:0045211	GO:0045211	CC	postsynaptic membrane	40/783	354/18437	1.79368e-08	1.77575e-06	1.41921e-06	Grm5/Gabrb3/Dlgap3/Adora1/Shank2/Dagla/Kcnd3/Shank3/Trpv1/Akap1/Synpo/Rnf112/Kcnj4/Grin1/Chrnb2/Cacna1e/Gabra1/Lhfpl4/Grip2/Dlg4/Clstn3/Arrb1/Homer1/F2r/Abhd17b/Ncs1/Nlgn2/Shank1/Cntn2/Kcna3/Ank3/Epn1/Srcin1/Dlg2/Pdlim4/Ntrk2/Slc6a1/Klhl17/Gabbr2/Erbb4	40
GO:0044445	GO:0044445	CC	cytosolic part	42/783	400/18437	6.52129e-08	5.53378e-06	4.42271e-06	Rps23/Rps25/Rpl36al/Rps13/Rpl23/Rps24/Rpl14/Rps14/LOC100911847/Rps27/Bloc1s2/Uba52/Rpl35al1/Rpl35a/Rpl9/Rps19/Rps10/Rpl24/Tsc2/Rps29/Psmc4/Rplp2/Ikbkg/Homer1/Rps3/Hap1/Ncs1/Cct6a/Rps12/LOC100360573/Tsc1/Rps15/Rps4x/Rpl10a/Eif4e/Rpl3/Rplp1/Rpl36/Uchl5/Rpl19/Rps2/Cct2	42
GO:0022626	GO:0022626	CC	cytosolic ribosome	30/783	249/18437	2.74222e-07	2.0361e-05	1.62729e-05	Rps23/Rps25/Rpl36al/Rps13/Rpl23/Rps24/Rpl14/Rps14/LOC100911847/Rps27/Uba52/Rpl35al1/Rpl35a/Rpl9/Rps19/Rps10/Rpl24/Rps29/Rplp2/Rps3/Rps12/LOC100360573/Rps15/Rps4x/Rpl10a/Rpl3/Rplp1/Rpl36/Rpl19/Rps2	30
GO:0044391	GO:0044391	CC	ribosomal subunit	35/783	336/18437	9.82152e-07	6.4618e-05	5.1644e-05	Rps23/Rps25/Rpl36al/Rps13/Rpl23/Rps24/mrpl11/Rpl14/Rps14/LOC100911847/Rps27/Uba52/Rpl35al1/Rpl35a/Rpl9/Rps19/Rps10/Rpl24/Rps29/Rplp2/Rps3/Rps12/LOC100360573/Rps15/Rps4x/Rpl10a/Rpl3/Rplp1/Mrpl2/Mrps22/Rpl36/Mrpl44/Rpl19/Mrps26/Rps2	35
GO:0022627	GO:0022627	CC	cytosolic small ribosomal subunit	17/783	101/18437	1.12535e-06	6.4618e-05	5.1644e-05	Rps23/Rps25/Rps13/Rps24/Rps14/LOC100911847/Rps27/Uba52/Rps19/Rps10/Rps29/Rps3/Rps12/LOC100360573/Rps15/Rps4x/Rps2	17
GO:0005840	GO:0005840	CC	ribosome	39/783	399/18437	1.19663e-06	6.4618e-05	5.1644e-05	Rps23/Rps25/Rpl36al/Rps13/Rpl23/Rps24/mrpl11/Rpl14/Rps14/LOC100911847/Rps27/Btf3/Uba52/Rpl35al1/Rpl35a/Rpl9/Rps19/Rps10/Rpl24/Rps29/LOC108352650/Decr2/Nme4/Rplp2/Rps3/Rps12/LOC100360573/Rps15/Rps4x/Rpl10a/Rpl3/Rplp1/Mrpl2/Mrps22/Rpl36/Mrpl44/Rpl19/Mrps26/Rps2	39
GO:0015935	GO:0015935	CC	small ribosomal subunit	19/783	132/18437	3.09947e-06	0.000153424	0.00012262	Rps23/Rps25/Rps13/Rps24/Rps14/LOC100911847/Rps27/Uba52/Rps19/Rps10/Rps29/Rps3/Rps12/LOC100360573/Rps15/Rps4x/Mrps22/Mrps26/Rps2	19
GO:0005844	GO:0005844	CC	polysome	15/783	87/18437	3.50237e-06	0.000160031	0.0001279	Rps23/Rps25/Btf3/Rpl24/Rps29/LOC108352650/Drg1/Rps3/Msi1/Rps4x/Rpl10a/Rpl36/Fxr1/Rpl19/Eif4h	15
GO:0005743	GO:0005743	CC	mitochondrial inner membrane	34/783	362/18437	1.34746e-05	0.000571706	0.000456919	Cox6c/Ndufs6/Atp5pd/Cox4i1/Got2/Uqcrh/Coq7/Mpv17/Akap1/Coq2/Coq3/Hadhb/Cox6b2/Grpel1/Ndufb4/Ndufs5/Rps3/Timm23/LOC100362432/Maip1/Timm17a/Mpc2/Ghitm/Cox7a2/Cox7a2l2/Coq4/Chchd10/Timm8b/Them4/Slc25a38/Uqcrq/Tmem126a/Ndufaf3/Endog	34
GO:0019866	GO:0019866	CC	organelle inner membrane	36/783	413/18437	3.79966e-05	0.00150467	0.00120256	Cox6c/Ndufs6/Atp5pd/Cox4i1/Got2/Uqcrh/Coq7/Mpv17/Akap1/Coq2/Coq3/Hadhb/Lmnb1/Cox6b2/Grpel1/Ndufb4/Tmem120a/Ndufs5/Rps3/Timm23/LOC100362432/Maip1/Timm17a/Mpc2/Ghitm/Cox7a2/Cox7a2l2/Coq4/Chchd10/Timm8b/Them4/Slc25a38/Uqcrq/Tmem126a/Ndufaf3/Endog	36
GO:0099240	GO:0099240	CC	intrinsic component of synaptic membrane	25/783	254/18437	8.63697e-05	0.00320648	0.00256268	Grm5/Gabrb3/Cadm3/Adora1/Dagla/Kcnd3/Slc2a3/LOC100909595/Kcnj9/Grin1/Chrnb2/Adgrl1/Cacna1e/Gabra1/Syt7/Dlg4/Clstn3/Abhd17b/Nlgn2/Cntn2/Kcna3/Dlg2/Slc6a1/Gabbr2/Erbb4	25
GO:0043197	GO:0043197	CC	dendritic spine	22/783	214/18437	0.000120001	0.00419298	0.00335111	Grm5/Rab8a/Dlgap3/Adora1/Shank2/Shank3/Trpv1/Ncoa2/Synpo/Grin1/Grip2/Dlg4/Arrb1/Homer1/Abhd17b/Shank1/Apba1/Dvl1/Pdlim4/Fxr1/Ntrk2/Abi2	22
GO:0044309	GO:0044309	CC	neuron spine	22/783	217/18437	0.00014697	0.00461752	0.00369042	Grm5/Rab8a/Dlgap3/Adora1/Shank2/Shank3/Trpv1/Ncoa2/Synpo/Grin1/Grip2/Dlg4/Arrb1/Homer1/Abhd17b/Shank1/Apba1/Dvl1/Pdlim4/Fxr1/Ntrk2/Abi2	22
GO:0034702	GO:0034702	CC	ion channel complex	27/783	294/18437	0.000147698	0.00461752	0.00369042	Amigo1/Gabrb3/Scn4b/Abhd12/Dlgap3/Scn2b/Shank2/Kcnd3/Shank3/Cntnap1/Grin1/Chrnb2/Cacna1e/Gabra1/Nrn1/Dlg4/Kcnq2/Sumo1/Cacnb1/Shank1/Cntn2/Kcna3/Hcn2/Kcnip3/Dlg2/Abcc8/Trpc6	27
GO:0044455	GO:0044455	CC	mitochondrial membrane part	24/783	250/18437	0.0001741	0.00517076	0.00413258	Cox6c/Ndufs6/Atp5pd/Cox4i1/Mff/Uqcrh/Coq7/Akap1/Coq2/Coq3/Cox6b2/Grpel1/Ndufb4/Ndufs5/Timm23/LOC100362432/Timm17a/Mpc2/Tomm40l/Cox7a2/Cox7a2l2/Coq4/Chchd10/Uqcrq	24
GO:0034703	GO:0034703	CC	cation channel complex	22/783	221/18437	0.000191209	0.00540849	0.00432257	Amigo1/Scn4b/Abhd12/Dlgap3/Scn2b/Kcnd3/Cntnap1/Grin1/Cacna1e/Nrn1/Dlg4/Kcnq2/Sumo1/Cacnb1/Shank1/Cntn2/Kcna3/Hcn2/Kcnip3/Dlg2/Abcc8/Trpc6	22
GO:0008021	GO:0008021	CC	synaptic vesicle	23/783	237/18437	0.000201181	0.00543188	0.00434127	Scamp5/Rab8a/Atg9a/Vti1a/Mff/Anxa5/Slc2a3/Rnf112/Rab5b/Grin1/Gnas/Syt7/Dlg4/Rab14/Bace1/Hap1/Syn1/Apba1/Ica1/Atp6v0d1/Sv2c/Abcc8/Rab2a	23
GO:0042734	GO:0042734	CC	presynaptic membrane	21/783	212/18437	0.00028362	0.00710197	0.00567604	Fosl1/Cadm3/Adora1/Cntnap1/Kcnj9/Grin1/Chrnb2/Adgrl1/Cacna1e/Syt7/Pip5k1c/Nlgn2/Cyth1/Rims4/Kcna3/Apba1/Epn1/Slc6a1/Gabbr2/Rims1/Erbb4	21
GO:0000153	GO:0000153	CC	cytoplasmic ubiquitin ligase complex	5/783	15/18437	0.000286948	0.00710197	0.00567604	Os9/Sel1l/Vhl/Elob/Eloc	5
GO:0098936	GO:0098936	CC	intrinsic component of postsynaptic membrane	19/783	185/18437	0.000345084	0.0081992	0.00655296	Grm5/Gabrb3/Adora1/Dagla/Kcnd3/Grin1/Chrnb2/Cacna1e/Gabra1/Dlg4/Clstn3/Abhd17b/Nlgn2/Cntn2/Kcna3/Dlg2/Slc6a1/Gabbr2/Erbb4	19
GO:0070382	GO:0070382	CC	exocytic vesicle	25/783	280/18437	0.00039251	0.00896734	0.00716688	Scamp5/Rab8a/Atg9a/Vti1a/Mff/Anxa5/Slc2a3/Rnf112/Rab5b/Grin1/Gnas/Syt7/Dlg4/Arf3/Rab14/Bace1/Hap1/Syn1/Apba1/Ica1/Rab11a/Atp6v0d1/Sv2c/Abcc8/Rab2a	25
GO:1902495	GO:1902495	CC	transmembrane transporter complex	27/783	314/18437	0.000425013	0.00935029	0.00747294	Amigo1/Gabrb3/Scn4b/Abhd12/Dlgap3/Scn2b/Shank2/Kcnd3/Shank3/Cntnap1/Grin1/Chrnb2/Cacna1e/Gabra1/Nrn1/Dlg4/Kcnq2/Sumo1/Cacnb1/Shank1/Cntn2/Kcna3/Hcn2/Kcnip3/Dlg2/Abcc8/Trpc6	27
GO:0042788	GO:0042788	CC	polysomal ribosome	8/783	44/18437	0.000465153	0.00986439	0.00788382	Rps23/Btf3/Rpl24/Rps29/LOC108352650/Rpl10a/Rpl36/Rpl19	8
GO:0000139	GO:0000139	CC	Golgi membrane	35/783	453/18437	0.00049688	0.00986439	0.00788382	Dhcr24/Scamp5/Chpt1/Sppl2b/Faahl/Furin/Vti1a/Nsg2/Rasgrp1/Uxs1/Slc9a8/Mgat5/Golga2/Gorasp1/Chst3/Ugcg/Atp7b/Gnas/Llgl1/Clstn3/Rab14/Galnt10/Abcb11/Adcyap1r1/Ndst1/Ica1/Tpst1/Gabarapl2/Trappc3/Ntrk2/Zdhhc20/Yif1b/B3galt4/Arfip2/Rab2a	35
GO:0043198	GO:0043198	CC	dendritic shaft	10/783	67/18437	0.000498202	0.00986439	0.00788382	Grm5/Kirrel3/Arhgef2/Slc12a5/Grip2/Syngap1/Homer1/Nlgn2/Hcn2/Map1a	10
GO:0008328	GO:0008328	CC	ionotropic glutamate receptor complex	9/783	56/18437	0.000541334	0.00993779	0.00794248	Abhd12/Dlgap3/Shank2/Shank3/Grin1/Nrn1/Dlg4/Shank1/Dlg2	9
GO:0098982	GO:0098982	CC	GABA-ergic synapse	13/783	106/18437	0.000550535	0.00993779	0.00794248	Gabrb3/Rps27/Kcnd3/Cacna1e/Gabra1/Syt7/Clstn3/Hap1/Nlgn2/Slc6a1/Gabbr2/Rims1/Erbb4	13
GO:0099025	GO:0099025	CC	anchored component of postsynaptic membrane	4/783	10/18437	0.0005521	0.00993779	0.00794248	Dlg4/Abhd17b/Cntn2/Dlg2	4
GO:1990351	GO:1990351	CC	transporter complex	27/783	321/18437	0.000597819	0.0104442	0.00834725	Amigo1/Gabrb3/Scn4b/Abhd12/Dlgap3/Scn2b/Shank2/Kcnd3/Shank3/Cntnap1/Grin1/Chrnb2/Cacna1e/Gabra1/Nrn1/Dlg4/Kcnq2/Sumo1/Cacnb1/Shank1/Cntn2/Kcna3/Hcn2/Kcnip3/Dlg2/Abcc8/Trpc6	27
GO:0034705	GO:0034705	CC	potassium channel complex	12/783	94/18437	0.00061789	0.0104865	0.008381	Amigo1/Kcnd3/Cntnap1/Dlg4/Kcnq2/Sumo1/Cntn2/Kcna3/Hcn2/Kcnip3/Dlg2/Abcc8	12
GO:0030133	GO:0030133	CC	transport vesicle	31/783	390/18437	0.000639412	0.0105503	0.00843201	Scamp5/Rab8a/Atg9a/Furin/Vti1a/Mff/Anxa5/Il33/Pcsk2/Slc2a3/Rnf112/Rab5b/Grin1/Gnas/Syt7/Dlg4/Arf3/Rab14/Bace1/Hap1/Vgf/Syn1/Yipf1/Apba1/Ica1/Myrip/Rab11a/Atp6v0d1/Sv2c/Abcc8/Rab2a	31
GO:0098554	GO:0098554	CC	cytoplasmic side of endoplasmic reticulum membrane	7/783	36/18437	0.000688874	0.0110288	0.00881443	Rps23/Rpl23/Sppl2b/Uba52/Rps29/Rps3/Rps15	7
GO:0098878	GO:0098878	CC	neurotransmitter receptor complex	9/783	58/18437	0.000705545	0.0110288	0.00881443	Abhd12/Dlgap3/Shank2/Shank3/Grin1/Nrn1/Dlg4/Shank1/Dlg2	9
GO:0005759	GO:0005759	CC	mitochondrial matrix	26/783	309/18437	0.000744736	0.011129	0.00889456	mrpl11/Ssbp1/Creb1/Rida/Got2/Atxn3/Hadhb/Pdp2/Cs/Grpel1/Gstk1/Glrx2/Ak3/Rps3/Eci1/Maip1/Tfam/Pdk2/Dars2/Cbr4/Mrpl2/Dlat/Mrps22/Mrpl44/Mrps26/Abat	26
GO:0008076	GO:0008076	CC	voltage-gated potassium channel complex	11/783	83/18437	0.000749431	0.011129	0.00889456	Amigo1/Kcnd3/Cntnap1/Dlg4/Kcnq2/Sumo1/Cntn2/Kcna3/Hcn2/Kcnip3/Dlg2	11
GO:0098556	GO:0098556	CC	cytoplasmic side of rough endoplasmic reticulum membrane	6/783	28/18437	0.000972182	0.0140848	0.0112568	Rps23/Rpl23/Uba52/Rps29/Rps3/Rps15	6
GO:0010008	GO:0010008	CC	endosome membrane	25/783	300/18437	0.00107	0.0151329	0.0120945	Scamp5/Rab8a/Pip4p1/Atg9a/Sppl2b/Furin/Vti1a/Nsg2/Dio3/Vps52/Snf8/Pip5k1c/Llgl1/Rab14/Abhd17b/Yipf1/Shc1/Rab11a/Tpcn1/Rabepk/Pdlim4/Ntrk2/Lamp2/Mvb12a/Tmem106b	25
GO:0099699	GO:0099699	CC	integral component of synaptic membrane	21/783	235/18437	0.00109841	0.0151734	0.0121269	Grm5/Gabrb3/Cadm3/Adora1/Dagla/Kcnd3/Slc2a3/LOC100909595/Kcnj9/Grin1/Chrnb2/Adgrl1/Cacna1e/Gabra1/Syt7/Clstn3/Nlgn2/Kcna3/Slc6a1/Gabbr2/Erbb4	21
GO:0022625	GO:0022625	CC	cytosolic large ribosomal subunit	15/783	143/18437	0.00112919	0.0152441	0.0121834	Rpl36al/Rpl23/Rpl14/Uba52/Rpl35al1/Rpl35a/Rpl9/Rpl24/Rplp2/Rps12/Rpl10a/Rpl3/Rplp1/Rpl36/Rpl19	15
GO:0005744	GO:0005744	CC	TIM23 mitochondrial import inner membrane translocase complex	4/783	13/18437	0.00169729	0.0220152	0.017595	Grpel1/Timm23/LOC100362432/Timm17a	4
GO:0032588	GO:0032588	CC	trans-Golgi network membrane	6/783	31/18437	0.00170488	0.0220152	0.017595	Scamp5/Nsg2/Atp7b/Gnas/Llgl1/Arfip2	6
GO:0031300	GO:0031300	CC	intrinsic component of organelle membrane	21/783	245/18437	0.00184408	0.0230274	0.018404	Pxmp2/Scamp5/Furin/Mff/Coq2/Rab5b/Rab14/Abhd17b/Timm23/LOC100362432/Syn1/Timm17a/Mpc2/Rdh16/Tpst1/Chchd10/Zdhhc20/Sv2c/Lamp2/Yif1b/Rab2a	21
GO:0044452	GO:0044452	CC	nucleolar part	17/783	181/18437	0.0018608	0.0230274	0.018404	Taf1a/Spata2/Znrd1/Polr1b/Nfic/Wdr12/Sumo1/Ncl/Ip6k1/Pes1/Ino80c/Cdkn2aip/Thap1/Selenbp1/Deaf1/Ube2i/Polr1c	17
GO:0005776	GO:0005776	CC	autophagosome	10/783	82/18437	0.00243064	0.0294653	0.0235493	Atg9a/Rab24/Vti1a/Pip4k2b/Hap1/Vmp1/LOC294154/Gabarapl2/LOC100359937/Lamp2	10
GO:0005802	GO:0005802	CC	trans-Golgi network	18/783	204/18437	0.00276846	0.0328205	0.0262308	Scamp5/Atg9a/Furin/Nsg2/Chst3/Atp7b/Gnas/Gcnt1/Llgl1/Rab14/Bace1/Yipf1/M6pr/Rab11a/Ap4m1/Lamp2/Arfrp1/Arfip2	18
GO:0000151	GO:0000151	CC	ubiquitin ligase complex	23/783	288/18437	0.00286471	0.0328205	0.0262308	Os9/Sel1l/Btrc/Cdkn1b/Arih1/Vhl/Sharpin/Cul5/Ikbkg/Rnf40/Cbx7/Elob/Ube4a/Fbxo7/Eloc/Dcun1d3/Rnf144a/Arih2/Stub1/Pcgf1/Gid8/Dcaf8/Ube2j2	23
GO:0044853	GO:0044853	CC	plasma membrane raft	13/783	127/18437	0.00292181	0.0328205	0.0262308	Adtrp/Insr/Kcnd3/Slc2a3/Tsc2/Chrnb2/Selplg/F2r/Add3/Nos3/Adcyap1r1/Igf1r/Erbb4	13
GO:0044440	GO:0044440	CC	endosomal part	25/783	323/18437	0.00292843	0.0328205	0.0262308	Scamp5/Rab8a/Pip4p1/Atg9a/Sppl2b/Furin/Vti1a/Nsg2/Dio3/Vps52/Snf8/Pip5k1c/Llgl1/Rab14/Abhd17b/Yipf1/Shc1/Rab11a/Tpcn1/Rabepk/Pdlim4/Ntrk2/Lamp2/Mvb12a/Tmem106b	25
GO:0090575	GO:0090575	CC	RNA polymerase II transcription factor complex	15/783	159/18437	0.00321764	0.035394	0.0282876	Mxd3/Carm1/Creb1/Gtf2h2/Ppard/Tle3/Thrb/Taf9b/Tcea1/LOC498453/Max/Cbfb/Rxra/Thra/Tbp	15
GO:0030659	GO:0030659	CC	cytoplasmic vesicle membrane	29/783	397/18437	0.00332227	0.0358806	0.0286765	Gabrb3/Scamp5/Rab8a/Vti1a/Mff/Nsg2/Ap2b1/Slc2a3/Kcnj4/Rab5b/Gabra1/Trarg1/Necap1/Syt7/Rab14/Bace1/Vgf/Taok2/Syn1/Kif1b/Ica1/Tnk2/Myrip/Rab11a/Sv2c/Lamp2/Abcc8/Rab2a/Serpina5	29
GO:0044304	GO:0044304	CC	main axon	10/783	86/18437	0.00345821	0.0366818	0.0293168	Adora1/Dagla/Cntnap1/Dlg4/Kcnq2/Kif13b/Cntn2/Ank3/Dlg2/Map1a	10
GO:0030687	GO:0030687	CC	preribosome, large subunit precursor	5/783	25/18437	0.00356854	0.0371879	0.0297213	Nsa2/Wdr12/Pes1/Rrp15/Ftsj3	5
GO:0015934	GO:0015934	CC	large ribosomal subunit	18/783	210/18437	0.00377196	0.0386301	0.030874	Rpl36al/Rpl23/mrpl11/Rpl14/Uba52/Rpl35al1/Rpl35a/Rpl9/Rpl24/Rplp2/Rps12/Rpl10a/Rpl3/Rplp1/Mrpl2/Rpl36/Mrpl44/Rpl19	18
GO:0005791	GO:0005791	CC	rough endoplasmic reticulum	13/783	132/18437	0.00408199	0.0410966	0.0328453	Rps23/Rpl23/Uba52/Ncoa2/Rps29/LOC108352650/Ncf1/Clock/Rab14/Rps3/Rps15/Adcyap1r1/Ntrk2	13
GO:0055029	GO:0055029	CC	nuclear DNA-directed RNA polymerase complex	11/783	103/18437	0.00431537	0.0418095	0.033415	Gtf2h2/Znrd1/Polr1b/Taf9b/Polr2g/Tcea1/LOC498453/Prim1/Tbp/Paf1/Polr1c	11
GO:0012506	GO:0012506	CC	vesicle membrane	30/783	423/18437	0.00437142	0.0418095	0.033415	Gabrb3/Scamp5/Rab8a/Vti1a/Mff/Nsg2/Ap2b1/Slc2a3/Kcnj4/Rab5b/Gabra1/Trarg1/Necap1/Syt7/Rab14/Bace1/Vgf/Taok2/Syn1/Nos3/Kif1b/Ica1/Tnk2/Myrip/Rab11a/Sv2c/Lamp2/Abcc8/Rab2a/Serpina5	30
GO:0098798	GO:0098798	CC	mitochondrial protein complex	22/783	281/18437	0.00442367	0.0418095	0.033415	Cox6c/Ndufs6/Atp5pd/Cox4i1/mrpl11/Uqcrh/Hadhb/Pdp2/Grpel1/Ndufb4/Ndufs5/Timm23/LOC100362432/Pdk2/Timm17a/Tomm40l/Chchd10/Mrpl2/Mrps22/Mrpl44/Mrps26/Uqcrq	22
GO:0031970	GO:0031970	CC	organelle envelope lumen	10/783	89/18437	0.00443434	0.0418095	0.033415	Cox17/Ak2/Chchd2/Nme4/Ak3/Timm23/Nradd/Chchd10/Timm8b/Them4	10
GO:0000428	GO:0000428	CC	DNA-directed RNA polymerase complex	11/783	104/18437	0.0046458	0.0431189	0.0344615	Gtf2h2/Znrd1/Polr1b/Taf9b/Polr2g/Tcea1/LOC498453/Prim1/Tbp/Paf1/Polr1c	11
GO:0030880	GO:0030880	CC	RNA polymerase complex	11/783	106/18437	0.00536676	0.0490439	0.0391969	Gtf2h2/Znrd1/Polr1b/Taf9b/Polr2g/Tcea1/LOC498453/Prim1/Tbp/Paf1/Polr1c	11
GO:0005770	GO:0005770	CC	late endosome	18/783	218/18437	0.00556088	0.0500479	0.0399993	Pip4p1/Atg9a/Vti1a/Nsg2/Snf8/Atp7b/Sdf4/Rab14/F2r/Bace1/Hap1/Yipf1/M6pr/Rab11a/Dync1li2/Lamp2/Mvb12a/Tmem106b	18
GO:0099056	GO:0099056	CC	integral component of presynaptic membrane	12/783	122/18437	0.00573261	0.0508234	0.0406191	Cadm3/Adora1/Kcnj9/Grin1/Chrnb2/Adgrl1/Cacna1e/Syt7/Kcna3/Slc6a1/Gabbr2/Erbb4	12
GO:0045121	GO:0045121	CC	membrane raft	28/783	396/18437	0.00600823	0.0524836	0.041946	Adcy6/Adtrp/Furin/Insr/Kcnd3/Slc2a3/Tsc2/Chrnb2/Adcy5/Selplg/Gnas/F2r/Bace1/Adam1a/Ednra/Add3/Nos3/Crk/Kcna3/Prom2/Adcyap1r1/Tuba1c/Igf1r/Tnr/Cd2/Adgrg1/Lamp2/Erbb4	28
GO:0005758	GO:0005758	CC	mitochondrial intermembrane space	9/783	79/18437	0.00619875	0.0527136	0.0421298	Cox17/Ak2/Chchd2/Nme4/Ak3/Timm23/Chchd10/Timm8b/Them4	9
GO:0098857	GO:0098857	CC	membrane microdomain	28/783	397/18437	0.00621204	0.0527136	0.0421298	Adcy6/Adtrp/Furin/Insr/Kcnd3/Slc2a3/Tsc2/Chrnb2/Adcy5/Selplg/Gnas/F2r/Bace1/Adam1a/Ednra/Add3/Nos3/Crk/Kcna3/Prom2/Adcyap1r1/Tuba1c/Igf1r/Tnr/Cd2/Adgrg1/Lamp2/Erbb4	28
GO:0031256	GO:0031256	CC	leading edge membrane	15/783	171/18437	0.00632198	0.0528909	0.0422715	Nme1/Aif1/Adora1/Insr/Trpv1/Arhgef2/Grin1/Slc12a5/Gabra1/Pip5k1c/Rps3/Fam107a/Nradd/Hcn2/Them4	15
GO:0030891	GO:0030891	CC	VCB complex	3/783	10/18437	0.00731828	0.0595487	0.0475926	Vhl/Elob/Eloc	3
GO:0044224	GO:0044224	CC	juxtaparanode region of axon	3/783	10/18437	0.00731828	0.0595487	0.0475926	Dlg4/Cntn2/Dlg2	3
GO:0099144	GO:0099144	CC	anchored component of synaptic membrane	4/783	19/18437	0.007512	0.0597576	0.0477595	Dlg4/Abhd17b/Cntn2/Dlg2	4
GO:0098562	GO:0098562	CC	cytoplasmic side of membrane	17/783	208/18437	0.00764205	0.0597576	0.0477595	Rps23/Rpl23/Sppl2b/Uba52/Mcf2l/Shank3/Nptxr/Cbx6/Rps29/Gnas/Dlg4/Rps3/Rps15/Gna13/Cyth1/Epn1/Cd2	17
GO:0099055	GO:0099055	CC	integral component of postsynaptic membrane	15/783	175/18437	0.00777584	0.0597576	0.0477595	Grm5/Gabrb3/Adora1/Dagla/Kcnd3/Grin1/Chrnb2/Cacna1e/Gabra1/Clstn3/Nlgn2/Kcna3/Slc6a1/Gabbr2/Erbb4	15
GO:0030672	GO:0030672	CC	synaptic vesicle membrane	12/783	127/18437	0.00784696	0.0597576	0.0477595	Scamp5/Vti1a/Mff/Slc2a3/Rab5b/Syt7/Rab14/Syn1/Ica1/Sv2c/Abcc8/Rab2a	12
GO:0099501	GO:0099501	CC	exocytic vesicle membrane	12/783	127/18437	0.00784696	0.0597576	0.0477595	Scamp5/Vti1a/Mff/Slc2a3/Rab5b/Syt7/Rab14/Syn1/Ica1/Sv2c/Abcc8/Rab2a	12
GO:0005901	GO:0005901	CC	caveola	10/783	97/18437	0.00811432	0.0610115	0.0487616	Adtrp/Insr/Kcnd3/Slc2a3/Tsc2/F2r/Nos3/Adcyap1r1/Igf1r/Erbb4	10
GO:0043204	GO:0043204	CC	perikaryon	15/783	177/18437	0.00859659	0.0638297	0.051014	Amigo1/Aif1/Got2/Anxa5/Pcsk2/Slc2a3/LOC100909595/Synpo/Asl/Slc12a5/Cacna1e/Ntrk2/Gal/Gabbr2/Endog	15
GO:0005667	GO:0005667	CC	transcription factor complex	26/783	371/18437	0.00883245	0.0641053	0.0512342	Mxd3/Carm1/Creb1/Taf1a/Gtf2h2/Crem/Ppard/Spi1/Tle3/Snf8/Vhl/Thrb/Clock/Taf9b/Tcea1/LOC498453/Max/Cbfb/Elob/Ets1/Rxra/Pus1/Thra/Tbp/Cdk4/Deaf1	26
GO:0043034	GO:0043034	CC	costamere	4/783	20/18437	0.00907965	0.0641053	0.0512342	Plec/Homer1/Ank3/Fxr1	4
GO:0098993	GO:0098993	CC	anchored component of synaptic vesicle membrane	4/783	20/18437	0.00907965	0.0641053	0.0512342	Rab5b/Rab14/Syn1/Rab2a	4
GO:0044798	GO:0044798	CC	nuclear transcription factor complex	16/783	195/18437	0.00914558	0.0641053	0.0512342	Mxd3/Carm1/Creb1/Taf1a/Gtf2h2/Ppard/Tle3/Thrb/Taf9b/Tcea1/LOC498453/Max/Cbfb/Rxra/Thra/Tbp	16
GO:0098948	GO:0098948	CC	intrinsic component of postsynaptic specialization membrane	11/783	114/18437	0.00917331	0.0641053	0.0512342	Gabrb3/Kcnd3/Grin1/Chrnb2/Gabra1/Dlg4/Clstn3/Abhd17b/Nlgn2/Dlg2/Erbb4	11
GO:0098589	GO:0098589	CC	membrane region	28/783	411/18437	0.00972274	0.0669585	0.0535146	Adcy6/Adtrp/Furin/Insr/Kcnd3/Slc2a3/Tsc2/Chrnb2/Adcy5/Selplg/Gnas/F2r/Bace1/Adam1a/Ednra/Add3/Nos3/Crk/Kcna3/Prom2/Adcyap1r1/Tuba1c/Igf1r/Tnr/Cd2/Adgrg1/Lamp2/Erbb4	28
GO:0000790	GO:0000790	CC	nuclear chromatin	27/783	393/18437	0.00990179	0.0669585	0.0535146	Nucks1/Creb1/Mre11a/Ppard/Spi1/Sfr1/Smarca2/Kat8/Mecp2/Klf2/Thrb/Clock/Ss18l1/Mef2d/Max/Cbx7/Rxra/Pus1/Ino80c/Tbp/Mcmbp/Xrcc1/Psip1/Gata3/Uchl5/Tnp2/Gata5	27
GO:0098800	GO:0098800	CC	inner mitochondrial membrane protein complex	13/783	147/18437	0.00991978	0.0669585	0.0535146	Cox6c/Ndufs6/Atp5pd/Cox4i1/Uqcrh/Grpel1/Ndufb4/Ndufs5/Timm23/LOC100362432/Timm17a/Chchd10/Uqcrq	13
GO:0101031	GO:0101031	CC	chaperone complex	4/783	21/18437	0.0108459	0.0723874	0.0578535	Cct6a/Tsc1/Stub1/Cct2	4
GO:0031902	GO:0031902	CC	late endosome membrane	9/783	87/18437	0.0114688	0.0756943	0.0604964	Pip4p1/Atg9a/Vti1a/Nsg2/Snf8/Yipf1/Lamp2/Mvb12a/Tmem106b	9
GO:1990204	GO:1990204	CC	oxidoreductase complex	11/783	119/18437	0.0124427	0.0776196	0.0620352	Ndufs6/Uqcrh/Ncf1/Ndufb4/Ndufs5/P4hb/Pdk2/Cbr4/Dlat/Uqcrq/Nox1	11
GO:0098889	GO:0098889	CC	intrinsic component of presynaptic membrane	12/783	135/18437	0.0124477	0.0776196	0.0620352	Cadm3/Adora1/Kcnj9/Grin1/Chrnb2/Adgrl1/Cacna1e/Syt7/Kcna3/Slc6a1/Gabbr2/Erbb4	12
GO:0098802	GO:0098802	CC	plasma membrane receptor complex	15/783	185/18437	0.01259	0.0776196	0.0620352	Abhd12/Dlgap3/Acvr1b/Shank2/Insr/Shank3/Cd79b/Grin1/Chrnb2/Nrn1/Dlg4/Shank1/Igf1r/Dlg2/Gabbr2	15
GO:0000137	GO:0000137	CC	Golgi cis cisterna	3/783	12/18437	0.0125924	0.0776196	0.0620352	Nsg2/Golga2/Llgl1	3
GO:0017146	GO:0017146	CC	NMDA selective glutamate receptor complex	3/783	12/18437	0.0125924	0.0776196	0.0620352	Dlgap3/Grin1/Shank1	3
GO:0031304	GO:0031304	CC	intrinsic component of mitochondrial inner membrane	6/783	46/18437	0.0126753	0.0776196	0.0620352	Coq2/Timm23/LOC100362432/Timm17a/Mpc2/Chchd10	6
GO:0031305	GO:0031305	CC	integral component of mitochondrial inner membrane	6/783	46/18437	0.0126753	0.0776196	0.0620352	Coq2/Timm23/LOC100362432/Timm17a/Mpc2/Chchd10	6
GO:0032589	GO:0032589	CC	neuron projection membrane	8/783	74/18437	0.0130102	0.0788575	0.0630245	Adora1/Insr/Trpv1/Grin1/Slc12a5/Gabra1/Nradd/Hcn2	8
GO:0035327	GO:0035327	CC	transcriptionally active chromatin	4/783	23/18437	0.0150078	0.0880873	0.0704012	Zc3h8/Pelp1/Psip1/Paf1	4
GO:0048786	GO:0048786	CC	presynaptic active zone	9/783	91/18437	0.0151084	0.0880873	0.0704012	Adora1/Shank2/Ncoa2/Cntnap1/Syn1/Rims4/Apba1/Ntrk2/Rims1	9
GO:0030684	GO:0030684	CC	preribosome	8/783	76/18437	0.0151261	0.0880873	0.0704012	Nsa2/Utp14a/Utp3/Wdr12/Pes1/Rrp15/Fcf1/Ftsj3	8
GO:0060076	GO:0060076	CC	excitatory synapse	8/783	76/18437	0.0151261	0.0880873	0.0704012	Cadm3/Kcnj9/Grin1/Dlg4/Homer1/Nlgn2/Shank1/Ntrk2	8
GO:0099634	GO:0099634	CC	postsynaptic specialization membrane	12/783	139/18437	0.0154105	0.0883433	0.0706057	Grm5/Gabrb3/Kcnd3/Grin1/Chrnb2/Gabra1/Dlg4/Clstn3/Abhd17b/Nlgn2/Dlg2/Erbb4	12
GO:0032590	GO:0032590	CC	dendrite membrane	6/783	48/18437	0.0154675	0.0883433	0.0706057	Insr/Trpv1/Grin1/Slc12a5/Gabra1/Hcn2	6
GO:0005736	GO:0005736	CC	RNA polymerase I complex	3/783	13/18437	0.0158609	0.0888809	0.0710354	Znrd1/Polr1b/Polr1c	3
GO:0042405	GO:0042405	CC	nuclear inclusion body	3/783	13/18437	0.0158609	0.0888809	0.0710354	Atxn3/Atxn1/Stub1	3
GO:0055037	GO:0055037	CC	recycling endosome	13/783	157/18437	0.0165118	0.0912829	0.0729552	Scamp5/Rab8a/Atg9a/Bloc1s2/Vps52/Snf8/Gnas/Rab14/Abhd17b/Bace1/Abcg1/Rab11a/Pdlim4	13
GO:0061695	GO:0061695	CC	transferase complex, transferring phosphorus-containing groups	18/783	244/18437	0.0165969	0.0912829	0.0729552	Acvr1b/Insr/Gtf2h2/Znrd1/Prpsap1/Polr1b/Socs2/Ikbkg/Taf9b/Polr2g/Tcea1/LOC498453/Prim1/Igf1r/Tbp/Paf1/Cdk4/Polr1c	18
GO:0005746	GO:0005746	CC	mitochondrial respiratory chain	9/783	93/18437	0.0172175	0.0930446	0.0743631	Cox6c/Ndufs6/Cox4i1/Uqcrh/Ndufb4/Ndufs5/Cox7a2/Cox7a2l2/Uqcrq	9
GO:0044306	GO:0044306	CC	neuron projection terminus	18/783	245/18437	0.0172305	0.0930446	0.0743631	Gabrb3/Vti1a/Anxa5/Adora1/Grin1/Syt7/Dlg4/Hap1/Ncs1/Syn1/Rnf40/Kcna3/Sncg/Kcnip3/Atp6v0d1/Epn1/Ntrk2/Gal	18
GO:0060077	GO:0060077	CC	inhibitory synapse	4/783	24/18437	0.0174181	0.0932102	0.0744955	Gabrb3/Lhfpl4/Nlgn2/Rims1	4
GO:0031253	GO:0031253	CC	cell projection membrane	22/783	321/18437	0.0190807	0.101196	0.0808779	Nme1/Adcy6/Aif1/Adora1/Shank2/Insr/Shank3/Trpv1/Arhgef2/Prom1/Grin1/Slc12a5/Gabra1/Pip5k1c/Rps3/Fam107a/Gna13/Nradd/Prom2/Hcn2/Them4/Nox1	22
GO:0005764	GO:0005764	CC	lysosome	27/783	416/18437	0.0194819	0.101919	0.0814555	Pip4p1/Bloc1s2/Sppl2b/Nsg2/Rasgrp1/Asah1/Wdr45b/Mfsd8/Tsc2/Syt7/Slc36a1/Mt1/Rab14/Bace1/Hap1/Ctbs/Ggh/Pcyox1/Tmem150a/M6pr/Ank3/Atp6v0d1/Tpcn1/Dync1li2/Lamp2/Tmem106b/Arrdc3	27
GO:0031314	GO:0031314	CC	extrinsic component of mitochondrial inner membrane	3/783	14/18437	0.0195602	0.101919	0.0814555	Coq7/Coq3/Coq4	3
GO:0000323	GO:0000323	CC	lytic vacuole	27/783	417/18437	0.0200236	0.103426	0.0826603	Pip4p1/Bloc1s2/Sppl2b/Nsg2/Rasgrp1/Asah1/Wdr45b/Mfsd8/Tsc2/Syt7/Slc36a1/Mt1/Rab14/Bace1/Hap1/Ctbs/Ggh/Pcyox1/Tmem150a/M6pr/Ank3/Atp6v0d1/Tpcn1/Dync1li2/Lamp2/Tmem106b/Arrdc3	27
GO:0043235	GO:0043235	CC	receptor complex	26/783	399/18437	0.0206452	0.105717	0.0844915	Gabrb3/Il4r/Abhd12/Dlgap3/Acvr1b/Shank2/Insr/Shank3/Cd79b/Grin1/Chrnb2/Gabra1/Nrn1/Dlg4/Lifr/Notch3/Taok2/Shank1/Rxra/Adcyap1r1/Igf1r/Dlg2/Ntrk2/Il11ra1/Gabbr2/Erbb4	26
GO:0030867	GO:0030867	CC	rough endoplasmic reticulum membrane	6/783	52/18437	0.022273	0.113078	0.0903745	Rps23/Rpl23/Uba52/Rps29/Rps3/Rps15	6
GO:0000421	GO:0000421	CC	autophagosome membrane	4/783	26/18437	0.022927	0.115412	0.0922396	Atg9a/Vmp1/Gabarapl2/Lamp2	4
GO:0150034	GO:0150034	CC	distal axon	27/783	423/18437	0.0235268	0.117436	0.0938576	Gabrb3/Vti1a/Anxa5/Adora1/Shank2/Nptxr/Cbx6/Tsc2/Grin1/Adgrl1/Syt7/Hap1/Ncs1/Taok2/Syn1/Rnf40/Tsc1/Csnk1e/Kcna3/Dvl1/Tnk2/Sncg/Kcnip3/Atp6v0d1/Epn1/Ntrk2/Dclk1	27
GO:0031301	GO:0031301	CC	integral component of organelle membrane	16/783	218/18437	0.0239804	0.118703	0.0948698	Pxmp2/Scamp5/Furin/Mff/Coq2/Timm23/LOC100362432/Timm17a/Mpc2/Rdh16/Tpst1/Chchd10/Zdhhc20/Sv2c/Lamp2/Yif1b	16
GO:0031225	GO:0031225	CC	anchored component of membrane	11/783	132/18437	0.0250491	0.122968	0.0982789	Rab5b/Nrn1/Dlg4/Rab14/Abhd17b/Syn1/Cntn2/Akp3/Dlg2/Cd2/Rab2a	11
GO:0099524	GO:0099524	CC	postsynaptic cytosol	4/783	27/18437	0.026035	0.126093	0.100776	Homer1/Hap1/Ncs1/Eif4e	4
GO:0016234	GO:0016234	CC	inclusion body	8/783	84/18437	0.0261101	0.126093	0.100776	Cabin1/Atxn3/Atxn1/Arih1/Psmc4/Hap1/Fbxo7/Stub1	8
GO:0043679	GO:0043679	CC	axon terminus	16/783	222/18437	0.0277917	0.133131	0.106401	Gabrb3/Vti1a/Anxa5/Adora1/Grin1/Syt7/Hap1/Ncs1/Syn1/Rnf40/Kcna3/Sncg/Kcnip3/Atp6v0d1/Epn1/Ntrk2	16
GO:0031462	GO:0031462	CC	Cul2-RING ubiquitin ligase complex	3/783	16/18437	0.0282603	0.134293	0.10733	Arih1/Vhl/Elob	3
GO:0042383	GO:0042383	CC	sarcolemma	13/783	171/18437	0.0307383	0.144909	0.115814	Adcy6/Got2/Anxa5/Kcnd3/Plec/Adcy5/Gnas/Ednra/Cacnb1/Nos3/Igf1r/Ank3/Abcc8	13
GO:0070469	GO:0070469	CC	respiratory chain	9/783	103/18437	0.0310693	0.145316	0.11614	Cox6c/Ndufs6/Cox4i1/Uqcrh/Ndufb4/Ndufs5/Cox7a2/Cox7a2l2/Uqcrq	9
GO:0030136	GO:0030136	CC	clathrin-coated vesicle	9/783	104/18437	0.0327858	0.148631	0.118789	Rab8a/Furin/Vti1a/Ap2b1/Necap1/Rab14/Ece1/Dvl1/Tnk2	9
GO:0044665	GO:0044665	CC	MLL1/2 complex	4/783	29/18437	0.0329753	0.148631	0.118789	Pelp1/Kat8/Max/Ino80c	4
GO:0071339	GO:0071339	CC	MLL1 complex	4/783	29/18437	0.0329753	0.148631	0.118789	Pelp1/Kat8/Max/Ino80c	4
GO:0033270	GO:0033270	CC	paranode region of axon	3/783	17/18437	0.0332587	0.148631	0.118789	Cntnap1/Kif13b/Ank3	3
GO:0097449	GO:0097449	CC	astrocyte projection	3/783	17/18437	0.0332587	0.148631	0.118789	Grm5/Kcnj10/Adgrg1	3
GO:0005795	GO:0005795	CC	Golgi stack	10/783	121/18437	0.0333235	0.148631	0.118789	Furin/Nsg2/Uxs1/Golga2/Gcnt1/Llgl1/Rab14/Yipf1/Akr7a2/Ica1	10
GO:0030135	GO:0030135	CC	coated vesicle	14/783	191/18437	0.0335295	0.148631	0.118789	Rab8a/Furin/Vti1a/Ap2b1/Golga2/Tmed5/Gnas/Necap1/Rab14/Ece1/Dvl1/Tnk2/Yipf5/Yif1b	14
GO:0005793	GO:0005793	CC	endoplasmic reticulum-Golgi intermediate compartment	8/783	89/18437	0.0352707	0.155191	0.124032	Uggt1/Golga2/Prom1/Tmed5/P4hb/Vmp1/Yif1b/Rab2a	8
GO:0070069	GO:0070069	CC	cytochrome complex	4/783	30/18437	0.036812	0.160782	0.1285	Cox6c/Cox4i1/Uqcrh/Uqcrq	4
GO:0033268	GO:0033268	CC	node of Ranvier	3/783	18/18437	0.0386838	0.167724	0.134048	Kcnq2/Cntn2/Ank3	3
GO:0032592	GO:0032592	CC	integral component of mitochondrial membrane	7/783	75/18437	0.0397598	0.17114	0.136779	Mff/Coq2/Timm23/LOC100362432/Timm17a/Mpc2/Chchd10	7
GO:0005902	GO:0005902	CC	microvillus	8/783	92/18437	0.0416981	0.178192	0.142415	Adcy6/Kcnj10/Prom1/Cd302/Kif13b/Dcxr/Prom2/Pdgfa	8
GO:0098573	GO:0098573	CC	intrinsic component of mitochondrial membrane	7/783	76/18437	0.0422589	0.179298	0.143299	Mff/Coq2/Timm23/LOC100362432/Timm17a/Mpc2/Chchd10	7
GO:0000407	GO:0000407	CC	phagophore assembly site	4/783	32/18437	0.0452231	0.190514	0.152263	Atg9a/Wdr45b/Vmp1/LOC294154	4
GO:0031252	GO:0031252	CC	cell leading edge	25/783	414/18437	0.0495782	0.206851	0.165319	Nme1/Aif1/Mcf2l/Adora1/Insr/Gas7/Trpv1/Pxn/Arhgef2/Grin1/Slc12a5/Gabra1/Gnas/Pip5k1c/Rps3/Fam107a/Cdc42bpb/Tsc1/Nradd/Hcn2/Srcin1/Them4/Pdlim4/Abi2/Arfip2	25
GO:0033116	GO:0033116	CC	endoplasmic reticulum-Golgi intermediate compartment membrane	4/783	33/18437	0.0497973	0.206851	0.165319	Golga2/Tmed5/Vmp1/Rab2a	4
GO:0016591	GO:0016591	CC	RNA polymerase II, holoenzyme	7/783	80/18437	0.0532595	0.219695	0.175585	Gtf2h2/Taf9b/Polr2g/Tcea1/LOC498453/Tbp/Paf1	7
GO:0098686	GO:0098686	CC	hippocampal mossy fiber to CA3 synapse	5/783	49/18437	0.0559419	0.227464	0.181794	Shank2/Grin1/Syt7/Bace1/Tnr	5
GO:0032587	GO:0032587	CC	ruffle membrane	7/783	81/18437	0.0562647	0.227464	0.181794	Nme1/Aif1/Arhgef2/Pip5k1c/Rps3/Fam107a/Them4	7
GO:0001650	GO:0001650	CC	fibrillar center	10/783	133/18437	0.0570572	0.227464	0.181794	Spata2/Nfic/Sumo1/Ncl/Ip6k1/Ino80c/Thap1/Selenbp1/Deaf1/Ube2i	10
GO:0046658	GO:0046658	CC	anchored component of plasma membrane	6/783	65/18437	0.057285	0.227464	0.181794	Nrn1/Dlg4/Abhd17b/Cntn2/Dlg2/Cd2	6
GO:0043194	GO:0043194	CC	axon initial segment	3/783	21/18437	0.0574405	0.227464	0.181794	Kcnq2/Ank3/Map1a	3
GO:1902710	GO:1902710	CC	GABA receptor complex	3/783	21/18437	0.0574405	0.227464	0.181794	Gabrb3/Gabra1/Gabbr2	3
GO:0015629	GO:0015629	CC	actin cytoskeleton	28/783	483/18437	0.0599801	0.235948	0.188575	Actn4/Sppl2b/Aif1/Gas7/Synpo/Mtpn/Pxn/Arhgef2/Shroom2/Llgl1/Cap2/Notch3/Fam107a/Afap1/Taok2/Apbb3/Cdc42bpb/Tsc1/Mark2/Crk/Myrip/Srcin1/Pdlim4/Lasp1/Ablim2/Klhl17/Abi2/Rflnb	28
GO:0044438	GO:0044438	CC	microbody part	6/783	66/18437	0.0608596	0.236278	0.188839	Pxmp2/Eci2/Tmem135/Decr2/Syt7/Prdx5	6
GO:0044439	GO:0044439	CC	peroxisomal part	6/783	66/18437	0.0608596	0.236278	0.188839	Pxmp2/Eci2/Tmem135/Decr2/Syt7/Prdx5	6
GO:0044437	GO:0044437	CC	vacuolar part	15/783	229/18437	0.0644467	0.241523	0.19303	Pip4p1/Atg9a/Bloc1s2/Sppl2b/Nsg2/Syt7/Slc36a1/Vmp1/M6pr/Atp6v0d1/Tpcn1/Abcc3/Gabarapl2/Lamp2/Tmem106b	15
GO:0098563	GO:0098563	CC	intrinsic component of synaptic vesicle membrane	6/783	67/18437	0.0645636	0.241523	0.19303	Scamp5/Rab5b/Rab14/Syn1/Sv2c/Rab2a	6
GO:0005832	GO:0005832	CC	chaperonin-containing T-complex	2/783	10/18437	0.06465	0.241523	0.19303	Cct6a/Cct2	2
GO:0005845	GO:0005845	CC	mRNA cap binding complex	2/783	10/18437	0.06465	0.241523	0.19303	Eif4e/Ncbp1	2
GO:0071006	GO:0071006	CC	U2-type catalytic step 1 spliceosome	2/783	10/18437	0.06465	0.241523	0.19303	Casc3/Isy1	2
GO:0071012	GO:0071012	CC	catalytic step 1 spliceosome	2/783	10/18437	0.06465	0.241523	0.19303	Casc3/Isy1	2
GO:0098685	GO:0098685	CC	Schaffer collateral - CA1 synapse	9/783	119/18437	0.0667314	0.24774	0.197999	Grm5/Synpo/Syn1/Shank1/Apba1/Dvl1/Tnr/Rab11a/Epn1	9
GO:0003735	GO:0003735	MF	structural constituent of ribosome	36/732	310/16869	7.66218e-08	6.72739e-05	5.84745e-05	Rps23/Rps25/Rpl36al/LOC108348287/Rps13/Rpl23/Rps24/mrpl11/Rpl14/Rps14/LOC100911847/Rps27/Uba52/Rpl35al1/Rpl9/Rps19/Rps10/Rpl24/Rps29/Decr2/Nme4/Rplp2/LOC100911575/Rps3/Rps12/LOC100360573/Rps15/Rps4x/Rpl10a/Rpl3/Rplp1/Mrpl2/Mrps22/Rpl36/Rpl19/Rps2	36
GO:0005159	GO:0005159	MF	insulin-like growth factor receptor binding	6/732	14/16869	1.45635e-05	0.00639338	0.00555713	Insr/Gnas/Socs2/Arrb1/Crk/Shc1	6
GO:0019843	GO:0019843	MF	rRNA binding	13/732	83/16869	5.55479e-05	0.0140545	0.0122162	Rps13/Rpl23/mrpl11/Rps14/LOC100911847/Rpl9/LOC100360449/LOC100364457/Rps3/Ncl/Rps4x/Rpl3/Rpl19	13
GO:0030374	GO:0030374	MF	nuclear receptor transcription coactivator activity	11/732	62/16869	6.40297e-05	0.0140545	0.0122162	Actn4/Carm1/Ppard/Ncoa2/Sfr1/Thrb/Thrap3/Psmc3ip/Pus1/Thra/Rxrb	11
GO:0016776	GO:0016776	MF	phosphotransferase activity, phosphate group as acceptor	8/732	34/16869	8.04747e-05	0.0141314	0.012283	Nme1/Ak2/Decr2/Nme4/Ak3/Ak6/Ip6k1/Nme3	8
GO:0098879	GO:0098879	MF	structural constituent of postsynaptic specialization	4/732	10/16869	0.000598769	0.0665105	0.057811	Shank2/Shank3/Dlg4/Dlg2	4
GO:0008320	GO:0008320	MF	protein transmembrane transporter activity	5/732	17/16869	0.000607317	0.0665105	0.057811	Timm23/LOC100362432/Timm17a/Tomm40l/LOC499136	5
GO:0042277	GO:0042277	MF	peptide binding	26/732	302/16869	0.000719145	0.0665105	0.057811	Dhcr24/Gstm5/Gstm3/Dlgap3/Furin/Anxa5/Ppig/Insr/Rnpep/Pom121/Grin1/Slc7a5/Grpr/Ogt/Gsta1/LOC108348061/Bace1/Apbb3/Kpna5/Tomm40l/Rxra/Adcyap1r1/Apba1/Ppib/Igf1r/Npr3	26
GO:0033218	GO:0033218	MF	amide binding	30/732	369/16869	0.000751552	0.0665105	0.057811	Dhcr24/Gstm5/Gstm3/Dlgap3/Furin/Anxa5/Eci2/Eci3/Ppig/Insr/Rnpep/Pom121/Hadhb/Grin1/Slc7a5/Grpr/Ogt/Gsta1/LOC108348061/Bace1/Pitpna/Apbb3/Kpna5/Tomm40l/Rxra/Adcyap1r1/Apba1/Ppib/Igf1r/Npr3	30
GO:0031369	GO:0031369	MF	translation initiation factor binding	7/732	36/16869	0.000781245	0.0665105	0.057811	Rps24/Rps19/Eif5/Polr2g/Eif2s2/Eif4e/Eif2b4	7
GO:0017124	GO:0017124	MF	SH3 domain binding	13/732	109/16869	0.000874558	0.0665105	0.057811	Shank2/Shank3/Cntnap1/Ncf1/Syngap1/Afap1/Dab2ip/Shank1/Crk/Sirpa/Mvb12a/Abi2/Rims1	13
GO:0016209	GO:0016209	MF	antioxidant activity	11/732	84/16869	0.00098615	0.0665105	0.057811	Nqo1/Txn1/Gstk1/Gsta1/Gpx6/Hp/Selenow/Alox5ap/Prdx5/Ccs/Selenot	11
GO:0008565	GO:0008565	MF	protein transporter activity	5/732	19/16869	0.00106175	0.0665105	0.057811	Timm23/LOC100362432/Timm17a/Tomm40l/LOC499136	5
GO:0019205	GO:0019205	MF	nucleobase-containing compound kinase activity	7/732	38/16869	0.00109551	0.0665105	0.057811	Nme1/Ak2/Decr2/Nme4/Ak3/Ak6/Nme3	7
GO:0019902	GO:0019902	MF	phosphatase binding	20/732	216/16869	0.00119061	0.0665105	0.057811	Ppp1r3c/Cabin1/Insr/Akap1/Nptxr/Cdkn1b/Pxn/Tsc2/Grin1/Dlg4/Dab2ip/Shc1/Ankle2/Sirpa/Cry2/Gab2/Dlg2/Pdlim4/Rcan3/Vrk3	20
GO:0044390	GO:0044390	MF	ubiquitin-like protein conjugating enzyme binding	7/732	39/16869	0.00128591	0.0665105	0.057811	Arih1/Rps3/Rnf40/Dcun1d3/Rnf144a/Rasd2/Arih2	7
GO:0022884	GO:0022884	MF	macromolecule transmembrane transporter activity	5/732	20/16869	0.00136557	0.0665105	0.057811	Timm23/LOC100362432/Timm17a/Tomm40l/LOC499136	5
GO:0099186	GO:0099186	MF	structural constituent of postsynapse	5/732	20/16869	0.00136557	0.0665105	0.057811	Shank2/Shank3/Dlg4/Homer1/Dlg2	5
GO:0097110	GO:0097110	MF	scaffold protein binding	10/732	75/16869	0.00143929	0.0665105	0.057811	Adcy6/Dlgap3/Shank3/Adcy5/Dlg4/Homer1/Shank1/Nos3/Crk/Kif1b	10
GO:0098918	GO:0098918	MF	structural constituent of synapse	6/732	30/16869	0.00158978	0.0697912	0.0606625	Shank2/Shank3/Dlg4/Homer1/Dlg2/Rims1	6
GO:0003727	GO:0003727	MF	single-stranded RNA binding	11/732	92/16869	0.0020881	0.080949	0.0703609	Atxn1/Cbx6/Dazap1/Polr2g/Msi1/Cbx7/Pus1/Thra/Fxr1/Eif4h/Jmjd6	11
GO:0016765	GO:0016765	MF	transferase activity, transferring alkyl or aryl (other than methyl) groups	9/732	66/16869	0.00209667	0.080949	0.0703609	Gstm5/Gstm3/Coq2/Gstk1/Gsta1/LOC108348061/Hmbs/Alox5ap/Srm	9
GO:0035254	GO:0035254	MF	glutamate receptor binding	9/732	67/16869	0.00233084	0.080949	0.0703609	Shank2/Shank3/Grin1/Gnas/Dlg4/Homer1/Shank1/Dlg2/Map1a	9
GO:0030159	GO:0030159	MF	receptor signaling complex scaffold activity	4/732	14/16869	0.00248378	0.080949	0.0703609	Shank2/Shank3/Grip2/Shank1	4
GO:0070181	GO:0070181	MF	small ribosomal subunit rRNA binding	4/732	14/16869	0.00248378	0.080949	0.0703609	Rps13/Rps14/LOC100911847/Rps3	4
GO:1990380	GO:1990380	MF	Lys48-specific deubiquitinase activity	4/732	14/16869	0.00248378	0.080949	0.0703609	Desi2/Yod1/Atxn3/Otud5	4
GO:0031624	GO:0031624	MF	ubiquitin conjugating enzyme binding	6/732	33/16869	0.00265533	0.080949	0.0703609	Arih1/Rnf40/Dcun1d3/Rnf144a/Rasd2/Arih2	6
GO:0035255	GO:0035255	MF	ionotropic glutamate receptor binding	7/732	44/16869	0.00265614	0.080949	0.0703609	Shank2/Shank3/Gnas/Dlg4/Shank1/Dlg2/Map1a	7
GO:0019903	GO:0019903	MF	protein phosphatase binding	16/732	168/16869	0.00267371	0.080949	0.0703609	Ppp1r3c/Cabin1/Insr/Akap1/Nptxr/Cdkn1b/Pxn/Dlg4/Dab2ip/Shc1/Ankle2/Sirpa/Gab2/Dlg2/Pdlim4/Vrk3	16
GO:0015405	GO:0015405	MF	P-P-bond-hydrolysis-driven transmembrane transporter activity	13/732	124/16869	0.00283914	0.0830922	0.0722238	Atp5pd/Anxa5/Atp7b/Timm23/LOC100362432/Abcb11/Timm17a/Pcyox1/LOC499136/Abcg1/Atp6v0d1/Abcc3/Abcc8	13
GO:0042887	GO:0042887	MF	amide transmembrane transporter activity	7/732	45/16869	0.00302995	0.0835854	0.0726525	Slc38a7/Timm23/LOC100362432/Timm17a/Tomm40l/LOC499136/Aqp9	7
GO:0015399	GO:0015399	MF	primary active transmembrane transporter activity	13/732	125/16869	0.00304639	0.0835854	0.0726525	Atp5pd/Anxa5/Atp7b/Timm23/LOC100362432/Abcb11/Timm17a/Pcyox1/LOC499136/Abcg1/Atp6v0d1/Abcc3/Abcc8	13
GO:0016651	GO:0016651	MF	oxidoreductase activity, acting on NAD(P)H	10/732	84/16869	0.00338411	0.090038	0.078261	Nqo1/Txn1/Ncf1/Ndufb4/Nos3/Dcxr/Cbr4/Cyb5r4/Nox1/Selenot	10
GO:0016667	GO:0016667	MF	oxidoreductase activity, acting on a sulfur group of donors	8/732	59/16869	0.00378739	0.0969804	0.0842954	Txn1/Gstk1/Glrx2/P4hb/Pcyox1/Txn2/Selenbp1/Selenot	8
GO:0051879	GO:0051879	MF	Hsp90 protein binding	7/732	47/16869	0.00389686	0.0969804	0.0842954	Tsc2/Ptges3l1/Rps3/Tsc1/Nos3/Stub1/Arhgdia	7
GO:0003713	GO:0003713	MF	transcription coactivator activity	21/732	256/16869	0.00397642	0.0969804	0.0842954	Actn4/Carm1/Ppard/Ncoa2/Ing4/Sfr1/Smarca2/Rexo4/Thrb/Thrap3/Psmc3ip/Ss18l1/Cbfb/Elob/Pus1/Thra/Rxrb/Psip1/Gata3/Tada2a/Jmjd6	21
GO:0004364	GO:0004364	MF	glutathione transferase activity	6/732	36/16869	0.00418275	0.0992556	0.086273	Gstm5/Gstm3/Gstk1/Gsta1/LOC108348061/Alox5ap	6
GO:0004402	GO:0004402	MF	histone acetyltransferase activity	8/732	61/16869	0.00466326	0.107746	0.0936528	Atf2/Kat8/Clock/Ogt/Taf9b/Kansl3/Brca2/Tada2a	8
GO:0061733	GO:0061733	MF	peptide-lysine-N-acetyltransferase activity	8/732	63/16869	0.00568667	0.128023	0.111278	Atf2/Kat8/Clock/Ogt/Taf9b/Kansl3/Brca2/Tada2a	8
GO:0016810	GO:0016810	MF	hydrolase activity, acting on carbon-nitrogen (but not peptide) bonds	12/732	120/16869	0.00592613	0.130079	0.113064	Faahl/Asah1/Atxn3/Adarb2/Gls/Dpysl5/Asrgl1/Cdadc1/Adar/Qrsl1/Mthfd1/Ddah2	12
GO:0015144	GO:0015144	MF	carbohydrate transmembrane transporter activity	6/732	39/16869	0.00627765	0.13306	0.115656	Slc23a2/Slc2a3/LOC100909595/Abcb11/Naglt1/Aqp9	6
GO:0043295	GO:0043295	MF	glutathione binding	4/732	18/16869	0.0066134	0.13306	0.115656	Gstm5/Gstm3/Gsta1/LOC108348061	4
GO:0008022	GO:0008022	MF	protein C-terminus binding	19/732	234/16869	0.00664768	0.13306	0.115656	Bloc1s2/Mre11a/Shank2/Shank3/Atxn1/Snf8/Tnni3k/Grip2/Dlg4/Map2k7/Sumo1/Ncl/Mif4gd/Shank1/Brca2/Kcnip3/Dlg2/Pcgf1/Ube2i	19
GO:0061578	GO:0061578	MF	Lys63-specific deubiquitinase activity	3/732	10/16869	0.00776667	0.13306	0.115656	Desi2/Atxn3/Otud5	3
GO:0004879	GO:0004879	MF	nuclear receptor activity	6/732	41/16869	0.0080423	0.13306	0.115656	Dio3/Ppard/Thrb/Rxra/Thra/Rxrb	6
GO:0015036	GO:0015036	MF	disulfide oxidoreductase activity	6/732	41/16869	0.0080423	0.13306	0.115656	Txn1/Gstk1/Glrx2/P4hb/Txn2/Selenot	6
GO:0098531	GO:0098531	MF	transcription factor activity, direct ligand regulated sequence-specific DNA binding	6/732	41/16869	0.0080423	0.13306	0.115656	Dio3/Ppard/Thrb/Rxra/Thra/Rxrb	6
GO:0004550	GO:0004550	MF	nucleoside diphosphate kinase activity	4/732	19/16869	0.00809384	0.13306	0.115656	Nme1/Decr2/Nme4/Nme3	4
GO:0036041	GO:0036041	MF	long-chain fatty acid binding	4/732	19/16869	0.00809384	0.13306	0.115656	Rida/Ppard/Pitpna/Alox5ap	4
GO:1900750	GO:1900750	MF	oligopeptide binding	4/732	19/16869	0.00809384	0.13306	0.115656	Gstm5/Gstm3/Gsta1/LOC108348061	4
GO:0016853	GO:0016853	MF	isomerase activity	14/732	157/16869	0.00847999	0.13306	0.115656	Eci2/Srr/Ppig/Pgam2/Pmm1/Fkbp11/Ptges3l1/P4hb/Eci1/Enoph1/Pus1/Ppib/Rpe/Hmgcs1	14
GO:0043177	GO:0043177	MF	organic acid binding	18/732	223/16869	0.0086004	0.13306	0.115656	Rida/Got2/Srr/Gfpt1/Insr/Ppard/Grin1/Pitpna/Hmbs/Alox5ap/Nos3/Rxra/Ncan/Castor1/Arhgdia/Ddah2/Serpina5/Hmgcs1	18
GO:0015175	GO:0015175	MF	neutral amino acid transmembrane transporter activity	5/732	30/16869	0.00877534	0.13306	0.115656	Slc38a7/Slc36a1/Sfxn3/Slc1a4/Slc25a38	5
GO:1904680	GO:1904680	MF	peptide transmembrane transporter activity	5/732	30/16869	0.00877534	0.13306	0.115656	Timm23/LOC100362432/Timm17a/Tomm40l/LOC499136	5
GO:0000049	GO:0000049	MF	tRNA binding	7/732	55/16869	0.0093365	0.13306	0.115656	Rpl35al1/Rpl35a/LOC103690996/LOC108349682/Rps10/Trnau1ap/Pus1	7
GO:0003707	GO:0003707	MF	steroid hormone receptor activity	7/732	55/16869	0.0093365	0.13306	0.115656	Nr2c2/Ppard/Thrb/Paqr8/Rxra/Thra/Rxrb	7
GO:0051082	GO:0051082	MF	unfolded protein binding	10/732	97/16869	0.00934638	0.13306	0.115656	Uggt1/Ppig/Hspb6/Grpel1/Pfdn6/Cct6a/Ppib/Nudc/Nudcd2/Cct2	10
GO:0005242	GO:0005242	MF	inward rectifier potassium channel activity	4/732	20/16869	0.00977591	0.13306	0.115656	Kcnj4/Kcnj10/Kcnj9/Kcnh7	4
GO:0001054	GO:0001054	MF	RNA polymerase I activity	3/732	11/16869	0.0103384	0.13306	0.115656	Znrd1/Polr1b/Polr1c	3
GO:0004861	GO:0004861	MF	cyclin-dependent protein serine/threonine kinase inhibitor activity	3/732	11/16869	0.0103384	0.13306	0.115656	Cdkn2c/Cdkn1b/Hexim1	3
GO:0032356	GO:0032356	MF	oxidized DNA binding	3/732	11/16869	0.0103384	0.13306	0.115656	Mutyh/Rps3/Xrcc1	3
GO:0043995	GO:0043995	MF	histone acetyltransferase activity (H4-K5 specific)	3/732	11/16869	0.0103384	0.13306	0.115656	Kat8/Ogt/Kansl3	3
GO:0043996	GO:0043996	MF	histone acetyltransferase activity (H4-K8 specific)	3/732	11/16869	0.0103384	0.13306	0.115656	Kat8/Ogt/Kansl3	3
GO:0046972	GO:0046972	MF	histone acetyltransferase activity (H4-K16 specific)	3/732	11/16869	0.0103384	0.13306	0.115656	Kat8/Ogt/Kansl3	3
GO:0070180	GO:0070180	MF	large ribosomal subunit rRNA binding	3/732	11/16869	0.0103384	0.13306	0.115656	Rpl23/mrpl11/Rpl19	3
GO:0031406	GO:0031406	MF	carboxylic acid binding	17/732	211/16869	0.010654	0.13306	0.115656	Rida/Got2/Srr/Gfpt1/Insr/Ppard/Grin1/Pitpna/Hmbs/Alox5ap/Nos3/Rxra/Ncan/Castor1/Arhgdia/Ddah2/Serpina5	17
GO:0005244	GO:0005244	MF	voltage-gated ion channel activity	16/732	195/16869	0.0110366	0.13306	0.115656	Scn4b/Scn2b/Kcnd3/Kcnj4/Kcnj10/Kcnj9/Grin1/Cacna1e/Kcnq2/Ncs1/Kcnh7/Cacnb1/Kcna3/Hcn2/Kcnip3/Tpcn1	16
GO:0022832	GO:0022832	MF	voltage-gated channel activity	16/732	195/16869	0.0110366	0.13306	0.115656	Scn4b/Scn2b/Kcnd3/Kcnj4/Kcnj10/Kcnj9/Grin1/Cacna1e/Kcnq2/Ncs1/Kcnh7/Cacnb1/Kcna3/Hcn2/Kcnip3/Tpcn1	16
GO:0022843	GO:0022843	MF	voltage-gated cation channel activity	13/732	146/16869	0.0110807	0.13306	0.115656	Kcnd3/Kcnj4/Kcnj10/Kcnj9/Grin1/Cacna1e/Kcnq2/Ncs1/Kcnh7/Cacnb1/Kcna3/Hcn2/Tpcn1	13
GO:0016709	GO:0016709	MF	oxidoreductase activity, acting on paired donors, with incorporation or reduction of molecular oxygen, NAD(P)H as one donor, and incorporation of one atom of oxygen	6/732	44/16869	0.0113191	0.13306	0.115656	Cyp51/Coq7/Sqle/Nos3/Akr1c13/Cyp4f18	6
GO:0016829	GO:0016829	MF	lyase activity	15/732	179/16869	0.0113564	0.13306	0.115656	Adcy6/Srr/Gmds/Uxs1/Azin1/Hadhb/Asl/Adcy5/Rps3/Eci1/Hmbs/Alox5ap/Cry2/Aldoart2/Paics	15
GO:0042974	GO:0042974	MF	retinoic acid receptor binding	5/732	32/16869	0.01155	0.13306	0.115656	Actn4/Uimc1/Ncoa2/Rxra/Rxrb	5
GO:0033293	GO:0033293	MF	monocarboxylic acid binding	8/732	71/16869	0.01156	0.13306	0.115656	Rida/Insr/Ppard/Pitpna/Alox5ap/Rxra/Arhgdia/Serpina5	8
GO:0047485	GO:0047485	MF	protein N-terminus binding	12/732	131/16869	0.0116231	0.13306	0.115656	Actn4/Tsc2/Plec/Snf8/Mecp2/Cacna1e/Kcnq2/Sct/Tsc1/Dab2ip/Mark2/Alox5ap	12
GO:0004602	GO:0004602	MF	glutathione peroxidase activity	4/732	21/16869	0.0116693	0.13306	0.115656	Gstk1/Gsta1/Gpx6/Alox5ap	4
GO:0015035	GO:0015035	MF	protein disulfide oxidoreductase activity	4/732	21/16869	0.0116693	0.13306	0.115656	Txn1/Gstk1/Glrx2/Txn2	4
GO:0032947	GO:0032947	MF	protein-containing complex scaffold activity	4/732	21/16869	0.0116693	0.13306	0.115656	Shank2/Shank3/Grip2/Shank1	4
GO:0005504	GO:0005504	MF	fatty acid binding	6/732	45/16869	0.0125944	0.141175	0.122709	Rida/Insr/Ppard/Pitpna/Alox5ap/Arhgdia	6
GO:0000014	GO:0000014	MF	single-stranded DNA endodeoxyribonuclease activity	3/732	12/16869	0.0133457	0.141175	0.122709	Mre11a/Xrcc1/Endog	3
GO:0000340	GO:0000340	MF	RNA 7-methylguanosine cap binding	3/732	12/16869	0.0133457	0.141175	0.122709	Eif4e/Ncbp1/Dcps	3
GO:0031994	GO:0031994	MF	insulin-like growth factor I binding	3/732	12/16869	0.0133457	0.141175	0.122709	Insr/Igfbp5/Igf1r	3
GO:0043121	GO:0043121	MF	neurotrophin binding	3/732	12/16869	0.0133457	0.141175	0.122709	Furin/Hap1/Ntrk2	3
GO:0047372	GO:0047372	MF	acylglycerol lipase activity	3/732	12/16869	0.0133457	0.141175	0.122709	Faahl/Abhd12/Abhd1	3
GO:0003743	GO:0003743	MF	translation initiation factor activity	7/732	59/16869	0.0135354	0.141477	0.122972	Rps24/Eif5/Eif2s2/Eif4a2/Eif4e/Eif4h/Eif2b4	7
GO:0003729	GO:0003729	MF	mRNA binding	20/732	269/16869	0.0137088	0.141604	0.123082	Rps13/Rps14/LOC100911847/Mecp2/Dazap1/Snrnp35/G3bp2/Hnrnpd/Rps3/Ncl/Eif2s2/Zfp36l2/Rnf40/Fyttd1/Etf1/Zfp36l1/Fxr1/Rps2/Rbfox2/Dxo	20
GO:0034212	GO:0034212	MF	peptide N-acetyltransferase activity	8/732	74/16869	0.014634	0.149403	0.129861	Atf2/Kat8/Clock/Ogt/Taf9b/Kansl3/Brca2/Tada2a	8
GO:0031625	GO:0031625	MF	ubiquitin protein ligase binding	22/732	309/16869	0.0159899	0.160877	0.139834	Rpl23/Uba52/Yod1/Casc3/Atxn3/Pxn/Arih1/Cul5/Ikbkg/Arrb1/Sumo1/Rnf40/Ggn/Elob/Fbxo7/Tnk2/Ankra2/Stub1/Gabarapl2/Cct2/Abi2/Ube2j2	22
GO:0010485	GO:0010485	MF	H4 histone acetyltransferase activity	4/732	23/16869	0.0161243	0.160877	0.139834	Kat8/Ogt/Kansl3/Brca2	4
GO:0003899	GO:0003899	MF	DNA-directed 5'-3' RNA polymerase activity	5/732	35/16869	0.0167431	0.165173	0.143569	Znrd1/Polr1b/Polr2g/Prim1/Polr1c	5
GO:0015171	GO:0015171	MF	amino acid transmembrane transporter activity	8/732	76/16869	0.0169883	0.165731	0.144053	Slc38a7/Slc36a1/Sfxn3/Slc7a5/Slc7a1/Slc1a4/Slc6a1/Slc25a38	8
GO:0035064	GO:0035064	MF	methylated histone binding	8/732	77/16869	0.0182625	0.174287	0.151491	Glyr1/Spin1/NEWGENE_1306210/Ing4/Kat8/L3mbtl2/Phf1/Cbx7	8
GO:0140034	GO:0140034	MF	methylation-dependent protein binding	8/732	77/16869	0.0182625	0.174287	0.151491	Glyr1/Spin1/NEWGENE_1306210/Ing4/Kat8/L3mbtl2/Phf1/Cbx7	8
GO:0019239	GO:0019239	MF	deaminase activity	4/732	24/16869	0.0187006	0.174672	0.151825	Rida/Adarb2/Cdadc1/Adar	4
GO:0031690	GO:0031690	MF	adrenergic receptor binding	4/732	24/16869	0.0187006	0.174672	0.151825	Gnas/Dlg4/Arrb1/Arrdc3	4
GO:0008080	GO:0008080	MF	N-acetyltransferase activity	9/732	93/16869	0.0194871	0.180102	0.156545	Atf2/Nat8f1/Kat8/Clock/Ogt/Taf9b/Kansl3/Brca2/Tada2a	9
GO:0035497	GO:0035497	MF	cAMP response element binding	3/732	14/16869	0.0207024	0.184574	0.160432	Atf2/Creb1/Creb3l2	3
GO:0034062	GO:0034062	MF	5'-3' RNA polymerase activity	5/732	37/16869	0.0209496	0.184574	0.160432	Znrd1/Polr1b/Polr2g/Prim1/Polr1c	5
GO:0097747	GO:0097747	MF	RNA polymerase activity	5/732	37/16869	0.0209496	0.184574	0.160432	Znrd1/Polr1b/Polr2g/Prim1/Polr1c	5
GO:1901567	GO:1901567	MF	fatty acid derivative binding	5/732	37/16869	0.0209496	0.184574	0.160432	Eci2/Eci3/Hadhb/Pitpna/Alox5ap	5
GO:0015145	GO:0015145	MF	monosaccharide transmembrane transporter activity	4/732	25/16869	0.0215178	0.184574	0.160432	Slc23a2/Slc2a3/LOC100909595/Naglt1	4
GO:0031210	GO:0031210	MF	phosphatidylcholine binding	4/732	25/16869	0.0215178	0.184574	0.160432	Rasgrp1/Pcyt1a/Pitpna/Serpina5	4
GO:0050997	GO:0050997	MF	quaternary ammonium group binding	4/732	25/16869	0.0215178	0.184574	0.160432	Rasgrp1/Pcyt1a/Pitpna/Serpina5	4
GO:0044325	GO:0044325	MF	ion channel binding	12/732	143/16869	0.0218666	0.184574	0.160432	Actn4/Scn4b/Kcnd3/Arrb1/Homer1/Hap1/Rims4/Ank3/Kcnip3/Epn1/Abcc8/Rims1	12
GO:0140098	GO:0140098	MF	catalytic activity, acting on RNA	22/732	319/16869	0.022129	0.184574	0.160432	Ang2/Rida/Znrd1/Wars/Polr1b/Dars/Polr2g/Mtfmt/Prim1/Eif4a2/Pus1/Dars2/Qrsl1/Isy1/Usb1/Mrpl44/Mtrex/Ftsj3/Polr1c/Jmjd6/Eprs/Endog	22
GO:0045309	GO:0045309	MF	protein phosphorylated amino acid binding	6/732	51/16869	0.0224095	0.184574	0.160432	Plcg2/Btrc/Arrb1/Crk/Shc1/Sirpa	6
GO:0042562	GO:0042562	MF	hormone binding	10/732	111/16869	0.0224358	0.184574	0.160432	Anxa5/Insr/Chrnb2/Thrb/Shc1/Adcyap1r1/Thra/Igf1r/Adipor1/Npr3	10
GO:0009055	GO:0009055	MF	electron transfer activity	8/732	80/16869	0.0224936	0.184574	0.160432	Cox6c/Cox4i1/Nqo1/Uqcrh/Glrx2/Cox7a2/Cox7a2l2/Uqcrq	8
GO:0140030	GO:0140030	MF	modification-dependent protein binding	13/732	161/16869	0.0232263	0.186462	0.162073	Glyr1/Uimc1/Carm1/Spin1/NEWGENE_1306210/Ing4/Kat8/Sharpin/L3mbtl2/Phf1/Ikbkg/Cbx7/Ank3	13
GO:1990782	GO:1990782	MF	protein tyrosine kinase binding	9/732	96/16869	0.0234579	0.186462	0.162073	Grm5/Anxa5/Sh2b1/Crk/Shc1/Sirpa/Gab2/Cd2/Ntrk2	9
GO:0016407	GO:0016407	MF	acetyltransferase activity	10/732	112/16869	0.0237159	0.186462	0.162073	Atf2/Nat8f1/Kat8/Clock/Ogt/Taf9b/Kansl3/Brca2/Dlat/Tada2a	10
GO:0030276	GO:0030276	MF	clathrin binding	6/732	52/16869	0.024435	0.186462	0.162073	Nsg2/Ap2b1/Syt7/Arrb1/Epn1/Trpc6	6
GO:0016814	GO:0016814	MF	hydrolase activity, acting on carbon-nitrogen (but not peptide) bonds, in cyclic amidines	4/732	26/16869	0.0245807	0.186462	0.162073	Adarb2/Cdadc1/Adar/Mthfd1	4
GO:0046966	GO:0046966	MF	thyroid hormone receptor binding	4/732	26/16869	0.0245807	0.186462	0.162073	Ncoa2/Thrap3/Psmc3ip/Rxrb	4
GO:0051119	GO:0051119	MF	sugar transmembrane transporter activity	4/732	26/16869	0.0245807	0.186462	0.162073	Slc23a2/Slc2a3/LOC100909595/Naglt1	4
GO:0008179	GO:0008179	MF	adenylate cyclase binding	3/732	15/16869	0.0250601	0.186462	0.162073	Adcy5/Cap2/Adcyap1r1	3
GO:0044213	GO:0044213	MF	intronic transcription regulatory region DNA binding	3/732	15/16869	0.0250601	0.186462	0.162073	Zc3h8/Ncoa2/Thra	3
GO:0050664	GO:0050664	MF	oxidoreductase activity, acting on NAD(P)H, oxygen as acceptor	3/732	15/16869	0.0250601	0.186462	0.162073	Ncf1/Cyb5r4/Nox1	3
GO:0019838	GO:0019838	MF	growth factor binding	12/732	146/16869	0.0252386	0.186462	0.162073	Furin/Acvr1b/Insr/Lifr/Hap1/Igfbp5/Shc1/Igf1r/Ntrk2/Pdgfa/Rps2/Il11ra1	12
GO:0051427	GO:0051427	MF	hormone receptor binding	14/732	180/16869	0.0252723	0.186462	0.162073	Actn4/Uimc1/Asah1/Ncoa2/Dnaaf4/Gnas/Socs2/Thrap3/Arrb1/Psmc3ip/Sumo1/Rxra/Cry2/Rxrb	14
GO:0015276	GO:0015276	MF	ligand-gated ion channel activity	11/732	131/16869	0.0273063	0.199791	0.173658	Gabrb3/Trpv1/Kcnj4/Kcnj10/Kcnj9/Grin1/Chrnb2/Gabra1/Kcnh7/Hcn2/Tpcn1	11
GO:0099094	GO:0099094	MF	ligand-gated cation channel activity	9/732	99/16869	0.0279746	0.20158	0.175213	Trpv1/Kcnj4/Kcnj10/Kcnj9/Grin1/Chrnb2/Kcnh7/Hcn2/Tpcn1	9
GO:0060090	GO:0060090	MF	molecular adaptor activity	15/732	200/16869	0.0280628	0.20158	0.175213	Dlgap3/Akap1/Socs2/Arrb1/Homer1/Sumo1/Sh2b1/Dab2ip/Crk/Gab2/Ank3/Hcn2/Epn1/Map1a/Klhl17	15
GO:0044389	GO:0044389	MF	ubiquitin-like protein ligase binding	22/732	327/16869	0.0282395	0.20158	0.175213	Rpl23/Uba52/Yod1/Casc3/Atxn3/Pxn/Arih1/Cul5/Ikbkg/Arrb1/Sumo1/Rnf40/Ggn/Elob/Fbxo7/Tnk2/Ankra2/Stub1/Gabarapl2/Cct2/Abi2/Ube2j2	22
GO:0051219	GO:0051219	MF	phosphoprotein binding	9/732	100/16869	0.0296072	0.208114	0.180893	Plcg2/Btrc/Trpv1/Thrap3/Arrb1/Cacnb1/Crk/Shc1/Sirpa	9
GO:0043621	GO:0043621	MF	protein self-association	7/732	69/16869	0.029629	0.208114	0.180893	Shank3/Atxn1/Rnf112/Zfp639/Cntn2/Crk/Cd2	7
GO:0000339	GO:0000339	MF	RNA cap binding	3/732	16/16869	0.0298707	0.208146	0.180921	Eif4e/Ncbp1/Dcps	3
GO:0000062	GO:0000062	MF	fatty-acyl-CoA binding	4/732	28/16869	0.0314593	0.215626	0.187422	Eci2/Eci3/Hadhb/Pitpna	4
GO:0022834	GO:0022834	MF	ligand-gated channel activity	11/732	134/16869	0.0315448	0.215626	0.187422	Gabrb3/Trpv1/Kcnj4/Kcnj10/Kcnj9/Grin1/Chrnb2/Gabra1/Kcnh7/Hcn2/Tpcn1	11
GO:0035257	GO:0035257	MF	nuclear hormone receptor binding	12/732	151/16869	0.0316808	0.215626	0.187422	Actn4/Uimc1/Asah1/Ncoa2/Dnaaf4/Thrap3/Arrb1/Psmc3ip/Sumo1/Rxra/Cry2/Rxrb	12
GO:0016597	GO:0016597	MF	amino acid binding	7/732	71/16869	0.0339447	0.227766	0.197974	Got2/Srr/Gfpt1/Grin1/Nos3/Castor1/Ddah2	7
GO:0050145	GO:0050145	MF	nucleoside monophosphate kinase activity	3/732	17/16869	0.0351307	0.227766	0.197974	Ak2/Ak3/Ak6	3
GO:0004129	GO:0004129	MF	cytochrome-c oxidase activity	4/732	29/16869	0.0352803	0.227766	0.197974	Cox6c/Cox4i1/Cox7a2/Cox7a2l2	4
GO:0015002	GO:0015002	MF	heme-copper terminal oxidase activity	4/732	29/16869	0.0352803	0.227766	0.197974	Cox6c/Cox4i1/Cox7a2/Cox7a2l2	4
GO:0016676	GO:0016676	MF	oxidoreductase activity, acting on a heme group of donors, oxygen as acceptor	4/732	29/16869	0.0352803	0.227766	0.197974	Cox6c/Cox4i1/Cox7a2/Cox7a2l2	4
GO:0030291	GO:0030291	MF	protein serine/threonine kinase inhibitor activity	4/732	29/16869	0.0352803	0.227766	0.197974	Cdkn2c/Cdkn1b/Pkig/Hexim1	4
GO:0048027	GO:0048027	MF	mRNA 5'-UTR binding	4/732	29/16869	0.0352803	0.227766	0.197974	Rps13/Rps14/LOC100911847/Ncl	4

## Sheet: Pink
	ID	Type	Description	GeneRatio	BgRatio	pvalue	p.adjust	qvalue	geneID	Count
GO:0007612	GO:0007612	BP	learning	13/261	179/17943	2.26154e-06	0.00328421	0.00313813	Nrxn3/Rin1/Slc8a2/Nlgn3/Grin2a/Slc24a2/Adcy3/Tac1/Rgs14/Drd2/Tacr2/Chst10/Atad1	13
GO:0007613	GO:0007613	BP	memory	12/261	156/17943	3.06817e-06	0.00328421	0.00313813	Rin1/Slc8a2/Grin2a/Slc24a2/Adcy8/S100b/Tac1/Rgs14/Drd2/Chst10/Nrg1/Atad1	12
GO:0007611	GO:0007611	BP	learning or memory	17/261	314/17943	3.74613e-06	0.00328421	0.00313813	Nrxn3/Kcnab1/Rin1/Slc8a2/Nlgn3/Grin2a/Slc24a2/Adcy3/Adcy8/S100b/Tac1/Rgs14/Drd2/Tacr2/Chst10/Nrg1/Atad1	17
GO:0050890	GO:0050890	BP	cognition	18/261	351/17943	4.13628e-06	0.00328421	0.00313813	Nrxn3/Kcnab1/Rin1/Slc8a2/Olr41/Nlgn3/Grin2a/Slc24a2/Adcy3/Adcy8/S100b/Tac1/Rgs14/Drd2/Tacr2/Chst10/Nrg1/Atad1	18
GO:1901660	GO:1901660	BP	calcium ion export	4/261	11/17943	1.33234e-05	0.00846303	0.0080866	Slc8a2/Letm1/Slc8a1/Rgs9	4
GO:0007416	GO:0007416	BP	synapse assembly	11/261	184/17943	8.24246e-05	0.0436301	0.0416895	Nrxn3/Gphn/Nlgn3/Add2/Lrrc4/Sipa1l1/Gap43/Dscam/Drd2/Nrg1/Cbln2	11
GO:0060359	GO:0060359	BP	response to ammonium ion	11/261	189/17943	0.000104727	0.047516	0.0454025	Hsp90ab1/Atf4/Kcnq3/Ass1/Grin2a/Pcsk1/Adcy8/Tac1/Drd2/Penk/Kcnc2	11
GO:0048167	GO:0048167	BP	regulation of synaptic plasticity	14/261	327/17943	0.000325765	0.115141	0.110019	Ncdn/Sqstm1/Stx3/Rin1/Slc8a2/Nlgn3/Grin2a/Slc24a2/Adcy8/S100b/Sipa1l1/Rgs14/Lnpep/Drd2	14
GO:0007616	GO:0007616	BP	long-term memory	5/261	42/17943	0.000343409	0.115141	0.110019	Adcy8/Tac1/Rgs14/Drd2/Chst10	5
GO:0009190	GO:0009190	BP	cyclic nucleotide biosynthetic process	4/261	25/17943	0.00043504	0.115141	0.110019	Adcy3/Adcy8/Gucy1a1/Gucy1b1	4
GO:0014821	GO:0014821	BP	phasic smooth muscle contraction	4/261	25/17943	0.00043504	0.115141	0.110019	P2rx2/Drd2/Tacr2/Htr1d	4
GO:0052652	GO:0052652	BP	cyclic purine nucleotide metabolic process	4/261	25/17943	0.00043504	0.115141	0.110019	Adcy3/Adcy8/Gucy1a1/Gucy1b1	4
GO:0060291	GO:0060291	BP	long-term synaptic potentiation	10/261	198/17943	0.000661875	0.157819	0.1508	Sqstm1/Stx3/Slc8a2/Nlgn3/Grin2a/Slc24a2/Adcy8/S100b/Rgs14/Drd2	10
GO:0050772	GO:0050772	BP	positive regulation of axonogenesis	7/261	102/17943	0.000725227	0.157819	0.1508	Stk25/Nefl/Trpc5/Rnd2/Dscam/Nrg1/Map6	7
GO:1900273	GO:1900273	BP	positive regulation of long-term synaptic potentiation	4/261	29/17943	0.000780369	0.157819	0.1508	Sqstm1/Grin2a/Adcy8/Drd2	4
GO:0006029	GO:0006029	BP	proteoglycan metabolic process	6/261	76/17943	0.000834752	0.157819	0.1508	Chst12/Cant1/Gpc1/B3gat1/Chst7/Chst10	6
GO:0030166	GO:0030166	BP	proteoglycan biosynthetic process	5/261	51/17943	0.000852688	0.157819	0.1508	Chst12/Cant1/B3gat1/Chst7/Chst10	5
GO:0014075	GO:0014075	BP	response to amine	6/261	77/17943	0.000894442	0.157819	0.1508	Ass1/Grin2a/Mapk9/Drd2/Rgs9/Kcnc2	6
GO:0048168	GO:0048168	BP	regulation of neuronal synaptic plasticity	6/261	78/17943	0.000957366	0.160031	0.152913	Ncdn/Slc8a2/Grin2a/S100b/Lnpep/Drd2	6
GO:1900271	GO:1900271	BP	regulation of long-term synaptic potentiation	5/261	53/17943	0.0010174	0.161563	0.154377	Sqstm1/Nlgn3/Grin2a/Adcy8/Drd2	5
GO:0008306	GO:0008306	BP	associative learning	7/261	109/17943	0.00107398	0.162426	0.155202	Rin1/Nlgn3/Grin2a/Adcy3/Tac1/Rgs14/Drd2	7
GO:0001964	GO:0001964	BP	startle response	4/261	32/17943	0.00114182	0.164837	0.157505	Grin2a/Drd2/Penk/Nrg1	4
GO:0035733	GO:0035733	BP	hepatic stellate cell activation	3/261	15/17943	0.00121622	0.167944	0.160474	Dgat1/Akap12/Gclc	3
GO:0042391	GO:0042391	BP	regulation of membrane potential	16/261	464/17943	0.00130998	0.173354	0.165643	Kcnq3/Ndufs1/Scn8a/Nlgn3/Dpp6/Kcnt2/Trpc5/Grin2a/Cacna1h/Pex5l/Tac1/Fhl1/P2rx2/Slc8a1/Gclc/Kcnc2	16
GO:0050808	GO:0050808	BP	synapse organization	16/261	470/17943	0.00149444	0.187098	0.178776	Nrxn3/Gphn/Nlgn3/Nefl/Add2/Grin2a/Lrrc4/Sipa1l1/Gap43/Dscam/P2rx2/Drd2/Nrg1/Tuba1a/Camk1/Cbln2	16
GO:0043278	GO:0043278	BP	response to morphine	5/261	58/17943	0.00153166	0.187098	0.178776	Pcsk1/Adcy8/Tac1/Drd2/Penk	5
GO:0097060	GO:0097060	CC	synaptic membrane	23/272	493/18437	1.23966e-06	0.000312499	0.000264199	Gphn/Plppr4/Stx3/Scn8a/Slc8a2/Nlgn3/Stxbp5/Kcnc3/Mpdz/Grin2a/Cacna1h/Lrrc4/Adcy8/Sipa1l1/Rgs14/P2rx2/Drd2/Slc8a1/Rgs9/Nrg1/Cntn6/Kcnc2/Atad1	23
GO:0045211	GO:0045211	CC	postsynaptic membrane	19/272	354/18437	1.41402e-06	0.000312499	0.000264199	Gphn/Plppr4/Scn8a/Slc8a2/Nlgn3/Kcnc3/Mpdz/Grin2a/Cacna1h/Lrrc4/Adcy8/Sipa1l1/Rgs14/Drd2/Slc8a1/Rgs9/Nrg1/Kcnc2/Atad1	19
GO:0098984	GO:0098984	CC	neuron to neuron synapse	20/272	445/18437	1.08386e-05	0.00159688	0.00135007	Gphn/Plppr4/Slc30a3/Scn8a/Stxbp5/Mpdz/Add2/Grin2a/Lrrc4/Adcy8/Sipa1l1/Rgs14/Gap43/Epb41l3/P2rx2/Drd2/Penk/Rgs9/Nrg1/Camk1	20
GO:0099240	GO:0099240	CC	intrinsic component of synaptic membrane	14/272	254/18437	2.62423e-05	0.00289978	0.00245159	Plppr4/Scn8a/Slc8a2/Nlgn3/Kcnc3/Grin2a/Cacna1h/Lrrc4/Adcy8/P2rx2/Drd2/Slc8a1/Nrg1/Cntn6	14
GO:0099699	GO:0099699	CC	integral component of synaptic membrane	13/272	235/18437	4.90422e-05	0.00417904	0.00353312	Plppr4/Scn8a/Slc8a2/Nlgn3/Kcnc3/Grin2a/Cacna1h/Lrrc4/Adcy8/P2rx2/Drd2/Slc8a1/Nrg1	13
GO:0099055	GO:0099055	CC	integral component of postsynaptic membrane	11/272	175/18437	5.97173e-05	0.00417904	0.00353312	Plppr4/Scn8a/Slc8a2/Nlgn3/Kcnc3/Grin2a/Cacna1h/Lrrc4/Drd2/Slc8a1/Nrg1	11
GO:0043204	GO:0043204	CC	perikaryon	11/272	177/18437	6.61839e-05	0.00417904	0.00353312	Kcnab1/Nell2/Slc8a2/Kcnc3/Ass1/Cacna1h/Pcsk1/Mapk9/Drd2/Penk/Kcnc2	11
GO:0042734	GO:0042734	CC	presynaptic membrane	12/272	212/18437	7.6696e-05	0.00423745	0.00358251	Stx3/Scn8a/Stxbp5/Kcnc3/Grin2a/Cacna1h/Adcy8/P2rx2/Drd2/Nrg1/Cntn6/Kcnc2	12
GO:0098936	GO:0098936	CC	intrinsic component of postsynaptic membrane	11/272	185/18437	9.8414e-05	0.00483322	0.0040862	Plppr4/Scn8a/Slc8a2/Nlgn3/Kcnc3/Grin2a/Cacna1h/Lrrc4/Drd2/Slc8a1/Nrg1	11
GO:0099572	GO:0099572	CC	postsynaptic specialization	18/272	452/18437	0.000140971	0.00577894	0.00488575	Gphn/Plppr4/Scn8a/Nlgn3/Mpdz/Add2/Grin2a/Lrrc4/Adcy8/Sipa1l1/Rgs14/Gap43/Epb41l3/P2rx2/Drd2/Rgs9/Nrg1/Camk1	18
GO:0014069	GO:0014069	CC	postsynaptic density	17/272	417/18437	0.000163495	0.00577894	0.00488575	Gphn/Plppr4/Scn8a/Mpdz/Add2/Grin2a/Lrrc4/Adcy8/Sipa1l1/Rgs14/Gap43/Epb41l3/P2rx2/Drd2/Rgs9/Nrg1/Camk1	17
GO:0098982	GO:0098982	CC	GABA-ergic synapse	8/272	106/18437	0.000175333	0.00577894	0.00488575	Nrxn3/Gphn/Nlgn3/Gap43/Gucy1a1/Drd2/Cdh13/Nrg1	8
GO:0098889	GO:0098889	CC	intrinsic component of presynaptic membrane	9/272	135/18437	0.000179632	0.00577894	0.00488575	Scn8a/Kcnc3/Grin2a/Cacna1h/Adcy8/P2rx2/Drd2/Nrg1/Cntn6	9
GO:0032279	GO:0032279	CC	asymmetric synapse	17/272	421/18437	0.000183043	0.00577894	0.00488575	Gphn/Plppr4/Scn8a/Mpdz/Add2/Grin2a/Lrrc4/Adcy8/Sipa1l1/Rgs14/Gap43/Epb41l3/P2rx2/Drd2/Rgs9/Nrg1/Camk1	17
GO:0030673	GO:0030673	CC	axolemma	4/272	22/18437	0.000274881	0.00774168	0.00654512	Kcnc3/Epb41l3/Nrg1/Kcnc2	4
GO:0044304	GO:0044304	CC	main axon	7/272	86/18437	0.000280242	0.00774168	0.00654512	Kcnab1/Kcnq3/Scn8a/Kcnc3/Epb41l3/Nrg1/Kcnc2	7
GO:0032593	GO:0032593	CC	insulin-responsive compartment	3/272	10/18437	0.000352938	0.00917639	0.00775808	Rab13/Rab4b/Lnpep	3
GO:0048786	GO:0048786	CC	presynaptic active zone	7/272	91/18437	0.000396608	0.00973893	0.00823367	Stx3/Scn8a/Cacna1h/Adcy8/P2rx2/Nrg1/Gucy1b1	7
GO:0099056	GO:0099056	CC	integral component of presynaptic membrane	8/272	122/18437	0.000457353	0.010157	0.00858715	Scn8a/Kcnc3/Grin2a/Cacna1h/Adcy8/P2rx2/Drd2/Nrg1	8
GO:0034703	GO:0034703	CC	cation channel complex	11/272	221/18437	0.000459594	0.010157	0.00858715	Kcnab1/Kcnq3/Scn8a/Dpp6/Kcnc3/Trpc5/Grin2a/Cacna1h/Pex5l/Olfm3/Kcnc2	11
GO:0150034	GO:0150034	CC	distal axon	16/272	423/18437	0.000577355	0.012152	0.0102737	Hsp90ab1/Stx3/Nefl/Kcnc3/Trpc5/Grin2a/Exoc8/Pcsk1/Myo9a/Gap43/Dscam/P2rx2/Drd2/Pvalb/Penk/Kcnc2	16
GO:0048787	GO:0048787	CC	presynaptic active zone membrane	5/272	47/18437	0.000622725	0.0125111	0.0105774	Stx3/Scn8a/Cacna1h/P2rx2/Nrg1	5
GO:0099059	GO:0099059	CC	integral component of presynaptic active zone membrane	4/272	28/18437	0.000717722	0.0137927	0.0116609	Scn8a/Cacna1h/P2rx2/Nrg1	4
GO:0060076	GO:0060076	CC	excitatory synapse	6/272	76/18437	0.000899077	0.016558	0.0139988	Scn8a/Nlgn3/Grin2a/Lrrc4/Adcy8/Cntn6	6
GO:0099634	GO:0099634	CC	postsynaptic specialization membrane	8/272	139/18437	0.00107932	0.0190824	0.016133	Gphn/Plppr4/Scn8a/Nlgn3/Grin2a/Lrrc4/Rgs9/Nrg1	8
GO:0043197	GO:0043197	CC	dendritic spine	10/272	214/18437	0.00133409	0.022163	0.0187375	Slc8a2/Fbxo2/Kcnc3/Grin2a/Lrrc4/Sipa1l1/Rgs14/P2rx2/Drd2/Slc8a1	10
GO:0098945	GO:0098945	CC	intrinsic component of presynaptic active zone membrane	4/272	33/18437	0.00135385	0.022163	0.0187375	Scn8a/Cacna1h/P2rx2/Nrg1	4
GO:0034702	GO:0034702	CC	ion channel complex	12/272	294/18437	0.0014672	0.0225591	0.0190723	Kcnab1/Kcnq3/Scn8a/Dpp6/Stxbp5/Kcnc3/Trpc5/Grin2a/Cacna1h/Pex5l/Olfm3/Kcnc2	12
GO:0044309	GO:0044309	CC	neuron spine	10/272	217/18437	0.00148012	0.0225591	0.0190723	Slc8a2/Fbxo2/Kcnc3/Grin2a/Lrrc4/Sipa1l1/Rgs14/P2rx2/Drd2/Slc8a1	10
GO:1902495	GO:1902495	CC	transmembrane transporter complex	12/272	314/18437	0.00253389	0.0373327	0.0315625	Kcnab1/Kcnq3/Scn8a/Dpp6/Stxbp5/Kcnc3/Trpc5/Grin2a/Cacna1h/Pex5l/Olfm3/Kcnc2	12
GO:1990351	GO:1990351	CC	transporter complex	12/272	321/18437	0.00303082	0.0432137	0.0365345	Kcnab1/Kcnq3/Scn8a/Dpp6/Stxbp5/Kcnc3/Trpc5/Grin2a/Cacna1h/Pex5l/Olfm3/Kcnc2	12
GO:0098839	GO:0098839	CC	postsynaptic density membrane	6/272	99/18437	0.00348056	0.0464305	0.0392542	Plppr4/Scn8a/Grin2a/Lrrc4/Rgs9/Nrg1	6
GO:0031252	GO:0031252	CC	cell leading edge	14/272	414/18437	0.00351125	0.0464305	0.0392542	Atf4/Stx3/Rab13/Plekhg5/Rock1/Hax1/Kcnc3/Slk/Exoc8/S100b/Epb41l3/Nrg1/Rasgrp2/Kcnc2	14
GO:0044306	GO:0044306	CC	neuron projection terminus	10/272	245/18437	0.00357158	0.0464305	0.0392542	Stx3/Ptpn9/Kcnc3/Grin2a/Pcsk1/P2rx2/Drd2/Pvalb/Penk/Kcnc2	10
GO:0032589	GO:0032589	CC	neuron projection membrane	5/272	74/18437	0.00473954	0.0598536	0.0506026	Atf4/Kcnc3/Epb41l3/Nrg1/Kcnc2	5
GO:0099061	GO:0099061	CC	integral component of postsynaptic density membrane	5/272	75/18437	0.0050182	0.0616123	0.0520895	Plppr4/Scn8a/Grin2a/Lrrc4/Nrg1	5
GO:0099060	GO:0099060	CC	integral component of postsynaptic specialization membrane	6/272	108/18437	0.00532834	0.0636521	0.053814	Plppr4/Scn8a/Nlgn3/Grin2a/Lrrc4/Nrg1	6
GO:0005753	GO:0005753	CC	mitochondrial proton-transporting ATP synthase complex	3/272	25/18437	0.00574474	0.066162	0.0559359	Atp5md/LOC103693430/Atp5pb	3
GO:0043679	GO:0043679	CC	axon terminus	9/272	222/18437	0.00583782	0.066162	0.0559359	Stx3/Kcnc3/Grin2a/Pcsk1/P2rx2/Drd2/Pvalb/Penk/Kcnc2	9
GO:0098948	GO:0098948	CC	intrinsic component of postsynaptic specialization membrane	6/272	114/18437	0.0069053	0.0747997	0.0632386	Plppr4/Scn8a/Nlgn3/Grin2a/Lrrc4/Nrg1	6
GO:0099146	GO:0099146	CC	intrinsic component of postsynaptic density membrane	5/272	81/18437	0.00693844	0.0747997	0.0632386	Plppr4/Scn8a/Grin2a/Lrrc4/Nrg1	5
GO:0045259	GO:0045259	CC	proton-transporting ATP synthase complex	3/272	27/18437	0.00714931	0.075238	0.0636092	Atp5md/LOC103693430/Atp5pb	3
GO:0000139	GO:0000139	CC	Golgi membrane	14/272	453/18437	0.00761754	0.0771374	0.065215	Chst15/Gorasp2/Chst12/Tbc1d20/Stk25/Cant1/Rock1/Rab40c/Zdhhc7/B3gat1/B4galt3/Chst7/Hpd/Chst10	14
GO:0008076	GO:0008076	CC	voltage-gated potassium channel complex	5/272	83/18437	0.00767883	0.0771374	0.065215	Kcnab1/Kcnq3/Dpp6/Kcnc3/Kcnc2	5
GO:0098685	GO:0098685	CC	Schaffer collateral - CA1 synapse	6/272	119/18437	0.0084575	0.0830715	0.0702319	Stx3/Stxbp5/Nefl/Lrrc4/Adcy8/Akap12	6
GO:0044224	GO:0044224	CC	juxtaparanode region of axon	2/272	10/18437	0.00902499	0.0867184	0.0733152	Kcnab1/Epb41l3	2
GO:0034774	GO:0034774	CC	secretory granule lumen	2/272	11/18437	0.0109239	0.100591	0.0850434	Pcsk1/Penk	2
GO:0070852	GO:0070852	CC	cell body fiber	2/272	11/18437	0.0109239	0.100591	0.0850434	Ass1/Penk	2
GO:0098688	GO:0098688	CC	parallel fiber to Purkinje cell synapse	3/272	33/18437	0.0124993	0.110347	0.093292	Scn8a/Grin2a/Cntn6	3
GO:0034705	GO:0034705	CC	potassium channel complex	5/272	94/18437	0.0127505	0.110347	0.093292	Kcnab1/Kcnq3/Dpp6/Kcnc3/Kcnc2	5
GO:0005883	GO:0005883	CC	neurofilament	2/272	12/18437	0.012982	0.110347	0.093292	Nefl/Dyrk1a	2
GO:0098992	GO:0098992	CC	neuronal dense core vesicle	2/272	12/18437	0.012982	0.110347	0.093292	Stxbp5/Penk	2
GO:0032809	GO:0032809	CC	neuronal cell body membrane	3/272	35/18437	0.0146749	0.122383	0.103468	Kcnc3/Adcy8/Kcnc2	3
GO:0019005	GO:0019005	CC	SCF ubiquitin ligase complex	4/272	65/18437	0.0155283	0.125892	0.106434	Fbxo2/Spsb2/Rbx1/Fbxo17	4
GO:0031594	GO:0031594	CC	neuromuscular junction	5/272	99/18437	0.0156653	0.125892	0.106434	Stxbp5/Nefl/Kcnc3/Nrg1/Tuba1a	5
GO:0030426	GO:0030426	CC	growth cone	8/272	219/18437	0.0162807	0.128502	0.10864	Hsp90ab1/Stx3/Nefl/Trpc5/Exoc8/Myo9a/Gap43/Dscam	8
GO:0044298	GO:0044298	CC	cell body membrane	3/272	37/18437	0.0170512	0.132222	0.111785	Kcnc3/Adcy8/Kcnc2	3
GO:0030427	GO:0030427	CC	site of polarized growth	8/272	222/18437	0.0175219	0.133529	0.112891	Hsp90ab1/Stx3/Nefl/Trpc5/Exoc8/Myo9a/Gap43/Dscam	8
GO:0005743	GO:0005743	CC	mitochondrial inner membrane	11/272	362/18437	0.0190311	0.142572	0.120536	Mcart1/Ndufs1/Atp5md/LOC103693430/Letm1/Slc25a18/Atp5pb/Surf1/LOC100912008/Crat/Atad3a	11
GO:0060205	GO:0060205	CC	cytoplasmic vesicle lumen	2/272	15/18437	0.020062	0.145582	0.123081	Pcsk1/Penk	2
GO:0019866	GO:0019866	CC	organelle inner membrane	12/272	413/18437	0.0200917	0.145582	0.123081	Mcart1/Ndufs1/Atp5md/LOC103693430/Letm1/Slc25a18/Atp5pb/Surf1/LOC100912008/Crat/Atad3a/P2rx2	12
GO:0031253	GO:0031253	CC	cell projection membrane	10/272	321/18437	0.0212656	0.151603	0.128171	Hsp90ab1/Atf4/Kcnc3/Aqp4/Gap43/Epb41l3/Drd2/Nrg1/Rasgrp2/Kcnc2	10
GO:0061827	GO:0061827	CC	sperm head	2/272	16/18437	0.0227077	0.159314	0.134691	Hsp90ab1/Tacr2	2
GO:0005911	GO:0005911	CC	cell-cell junction	13/272	476/18437	0.0249304	0.170695	0.144312	Sh3kbp1/Stx3/Rab13/Plekhg5/Flcn/Mpdz/Aqp4/Gjb3/Epb41l3/Magi3/Slc8a1/Cdh7/Cdh13	13
GO:0000152	GO:0000152	CC	nuclear ubiquitin ligase complex	3/272	43/18437	0.0253966	0.170695	0.144312	Pcgf6/Rbx1/Babam2	3
GO:0031983	GO:0031983	CC	vesicle lumen	2/272	17/18437	0.0254883	0.170695	0.144312	Pcsk1/Penk	2
GO:0033268	GO:0033268	CC	node of Ranvier	2/272	18/18437	0.0283995	0.187352	0.158395	Kcnq3/Scn8a	2
GO:0036464	GO:0036464	CC	cytoplasmic ribonucleoprotein granule	7/272	202/18437	0.0306077	0.19895	0.1682	Sqstm1/Cnot9/Pqbp1/Rock1/Hax1/Ddx25/Tuba1a	7
GO:0032590	GO:0032590	CC	dendrite membrane	3/272	48/18437	0.0337455	0.215924	0.182551	Atf4/Kcnc3/Kcnc2	3
GO:0030659	GO:0030659	CC	cytoplasmic vesicle membrane	11/272	397/18437	0.0341961	0.215924	0.182551	Sh3kbp1/Stx3/Slc30a3/Rab13/Stxbp5/Epn2/Rab4b/Adcy8/Lnpep/Drd2/Map6	11
GO:0016323	GO:0016323	CC	basolateral plasma membrane	8/272	254/18437	0.0352458	0.216206	0.182789	Hsp90ab1/Slc8a2/Slco4c1/Aqp4/Ca11/Adcy8/Slc8a1/Kcnc2	8
GO:0098686	GO:0098686	CC	hippocampal mossy fiber to CA3 synapse	3/272	49/18437	0.035566	0.216206	0.182789	Slc30a3/Stxbp5/Adcy8	3
GO:0016234	GO:0016234	CC	inclusion body	4/272	84/18437	0.0357083	0.216206	0.182789	Hsp90ab1/Ubqln1/Sqstm1/Atf4	4
GO:0043194	GO:0043194	CC	axon initial segment	2/272	21/18437	0.0378721	0.226209	0.191246	Kcnq3/Scn8a	2
GO:0043195	GO:0043195	CC	terminal bouton	5/272	126/18437	0.0390238	0.22998	0.194434	Stx3/Grin2a/P2rx2/Pvalb/Kcnc2	5
GO:0005686	GO:0005686	CC	U2 snRNP	2/272	22/18437	0.0412619	0.235608	0.199193	Phf5a/Sf3a3	2
GO:0031256	GO:0031256	CC	leading edge membrane	6/272	171/18437	0.0415256	0.235608	0.199193	Atf4/Kcnc3/Epb41l3/Nrg1/Rasgrp2/Kcnc2	6
GO:0035770	GO:0035770	CC	ribonucleoprotein granule	7/272	216/18437	0.0415779	0.235608	0.199193	Sqstm1/Cnot9/Pqbp1/Rock1/Hax1/Ddx25/Tuba1a	7
GO:0015368	GO:0015368	MF	calcium:cation antiporter activity	4/253	10/16869	9.66552e-06	0.0050744	0.00460893	Slc8a2/Letm1/Slc24a2/Slc8a1	4
GO:0004016	GO:0004016	MF	adenylate cyclase activity	4/253	12/16869	2.22496e-05	0.00584051	0.00530476	Adcy3/Adcy8/Gucy1a1/Gucy1b1	4
GO:0015298	GO:0015298	MF	solute:cation antiporter activity	5/253	30/16869	7.64898e-05	0.0133857	0.0121578	Clcn4/Slc8a2/Letm1/Slc24a2/Slc8a1	5
GO:0015491	GO:0015491	MF	cation:cation antiporter activity	4/253	23/16869	0.000349528	0.0365779	0.0332226	Slc8a2/Letm1/Slc24a2/Slc8a1	4
GO:0050897	GO:0050897	MF	cobalt ion binding	3/253	10/16869	0.00037006	0.0365779	0.0332226	Myt1l/Epas1/P2rx2	3
GO:0009975	GO:0009975	MF	cyclase activity	4/253	25/16869	0.000487705	0.0365779	0.0332226	Adcy3/Adcy8/Gucy1a1/Gucy1b1	4
GO:0016849	GO:0016849	MF	phosphorus-oxygen lyase activity	4/253	25/16869	0.000487705	0.0365779	0.0332226	Adcy3/Adcy8/Gucy1a1/Gucy1b1	4
GO:0005261	GO:0005261	MF	cation channel activity	13/253	317/16869	0.00103703	0.0605021	0.0549523	Kcnab1/Kcnq3/Grina/Scn8a/Kcnt2/Kcnc3/Trpc5/Grin2a/Slc24a2/Cacna1h/Pex5l/P2rx2/Kcnc2	13
GO:0005516	GO:0005516	MF	calmodulin binding	9/253	169/16869	0.00103718	0.0605021	0.0549523	Kcnq3/Slc8a2/Add2/Adcy3/Adcy8/Gap43/Slc8a1/Camk1/Map6	9
GO:0022838	GO:0022838	MF	substrate-specific channel activity	15/253	417/16869	0.0016318	0.0784032	0.0712113	Clcn4/Kcnab1/Kcnq3/Grina/Scn8a/Kcnt2/Kcnc3/Trpc5/Grin2a/Slc24a2/Aqp4/Cacna1h/Pex5l/P2rx2/Kcnc2	15
GO:0015077	GO:0015077	MF	monovalent inorganic cation transmembrane transporter activity	14/253	375/16869	0.00164273	0.0784032	0.0712113	Clcn4/Kcnab1/Kcnq3/Scn8a/Slc8a2/Kcnt2/Kcnc3/Letm1/Slc24a2/Atp5pb/Surf1/LOC100912008/Slc8a1/Kcnc2	14
GO:0004089	GO:0004089	MF	carbonate dehydratase activity	3/253	17/16869	0.00194025	0.0848858	0.0770993	Ca8/Ca5b/Ca11	3
GO:0005244	GO:0005244	MF	voltage-gated ion channel activity	9/253	195/16869	0.00277125	0.103913	0.0943814	Clcn4/Kcnab1/Kcnq3/Scn8a/Kcnt2/Kcnc3/Grin2a/Cacna1h/Kcnc2	9
GO:0022832	GO:0022832	MF	voltage-gated channel activity	9/253	195/16869	0.00277125	0.103913	0.0943814	Clcn4/Kcnab1/Kcnq3/Scn8a/Kcnt2/Kcnc3/Grin2a/Cacna1h/Kcnc2	9
GO:0015267	GO:0015267	MF	channel activity	15/253	447/16869	0.00316688	0.103913	0.0943814	Clcn4/Kcnab1/Kcnq3/Grina/Scn8a/Kcnt2/Kcnc3/Trpc5/Grin2a/Slc24a2/Aqp4/Cacna1h/Pex5l/P2rx2/Kcnc2	15
GO:0022803	GO:0022803	MF	passive transmembrane transporter activity	15/253	447/16869	0.00316688	0.103913	0.0943814	Clcn4/Kcnab1/Kcnq3/Grina/Scn8a/Kcnt2/Kcnc3/Trpc5/Grin2a/Slc24a2/Aqp4/Cacna1h/Pex5l/P2rx2/Kcnc2	15
GO:0005216	GO:0005216	MF	ion channel activity	14/253	406/16869	0.00338362	0.104494	0.0949089	Clcn4/Kcnab1/Kcnq3/Grina/Scn8a/Kcnt2/Kcnc3/Trpc5/Grin2a/Slc24a2/Cacna1h/Pex5l/P2rx2/Kcnc2	14
GO:0015085	GO:0015085	MF	calcium ion transmembrane transporter activity	7/253	134/16869	0.00410946	0.114889	0.104351	Slc8a2/Letm1/Trpc5/Grin2a/Slc24a2/Cacna1h/Slc8a1	7
GO:0048156	GO:0048156	MF	tau protein binding	3/253	22/16869	0.0041579	0.114889	0.104351	Hsp90ab1/Dyrk1a/S100b	3
GO:0046873	GO:0046873	MF	metal ion transmembrane transporter activity	14/253	430/16869	0.00558573	0.139508	0.126711	Slc30a3/Kcnab1/Kcnq3/Scn8a/Slc8a2/Kcnt2/Kcnc3/Letm1/Trpc5/Grin2a/Slc24a2/Cacna1h/Slc8a1/Kcnc2	14
GO:0015297	GO:0015297	MF	antiporter activity	5/253	76/16869	0.00567399	0.139508	0.126711	Clcn4/Slc8a2/Letm1/Slc24a2/Slc8a1	5
GO:0044325	GO:0044325	MF	ion channel binding	7/253	143/16869	0.00584607	0.139508	0.126711	Hsp90ab1/Kcnab1/Kcnq3/Grina/Fhl1/Slc8a1/Kcnc2	7
GO:0022843	GO:0022843	MF	voltage-gated cation channel activity	7/253	146/16869	0.00653184	0.149096	0.13542	Kcnab1/Kcnq3/Kcnt2/Kcnc3/Grin2a/Cacna1h/Kcnc2	7
GO:0099516	GO:0099516	MF	ion antiporter activity	4/253	52/16869	0.00761249	0.166523	0.151248	Slc8a2/Letm1/Slc24a2/Slc8a1	4
GO:0003725	GO:0003725	MF	double-stranded RNA binding	5/253	83/16869	0.0081976	0.17215	0.156358	Hsp90ab1/Ddx21/Oas1b/Oas1k/Oas1f	5
GO:0031593	GO:0031593	MF	polyubiquitin modification-dependent protein binding	4/253	54/16869	0.00868866	0.174618	0.158601	Ubqln1/Sqstm1/Ufd1/Babam2	4
GO:0005251	GO:0005251	MF	delayed rectifier potassium channel activity	3/253	29/16869	0.0091344	0.174618	0.158601	Kcnq3/Kcnc3/Kcnc2	3
GO:0050543	GO:0050543	MF	icosatetraenoic acid binding	2/253	10/16869	0.00931297	0.174618	0.158601	Stx3/Fabp3	2
GO:0008146	GO:0008146	MF	sulfotransferase activity	4/253	56/16869	0.00985969	0.176437	0.160252	Chst15/Chst12/Chst7/Chst10	4
GO:0005249	GO:0005249	MF	voltage-gated potassium channel activity	5/253	88/16869	0.0104174	0.176437	0.160252	Kcnab1/Kcnq3/Kcnt2/Kcnc3/Kcnc2	5
GO:0022839	GO:0022839	MF	ion gated channel activity	11/253	326/16869	0.0104182	0.176437	0.160252	Clcn4/Kcnab1/Kcnq3/Scn8a/Kcnt2/Kcnc3/Grin2a/Cacna1h/Pex5l/P2rx2/Kcnc2	11
GO:0004712	GO:0004712	MF	protein serine/threonine/tyrosine kinase activity	3/253	31/16869	0.0109931	0.179307	0.162859	Tesk1/Dyrk1a/Mapk9	3
GO:0004383	GO:0004383	MF	guanylate cyclase activity	2/253	11/16869	0.0112707	0.179307	0.162859	Gucy1a1/Gucy1b1	2
GO:0022836	GO:0022836	MF	gated channel activity	11/253	337/16869	0.0130936	0.20218	0.183634	Clcn4/Kcnab1/Kcnq3/Scn8a/Kcnt2/Kcnc3/Grin2a/Cacna1h/Pex5l/P2rx2/Kcnc2	11

## Sheet: Salmon
	ID	Type	Description	GeneRatio	BgRatio	pvalue	p.adjust	qvalue	geneID	Count
GO:0099504	GO:0099504	BP	synaptic vesicle cycle	14/112	243/17943	3.55463e-10	9.4802e-07	7.77155e-07	Unc13a/Trim9/Syt1/Cacna1b/Slc17a7/Doc2b/Cnr1/Bsn/Sept5/Vamp2/Unc13c/Erc1/Sptbn2/Dnm1	14
GO:0017156	GO:0017156	BP	calcium ion regulated exocytosis	12/112	190/17943	2.4623e-09	1.61349e-06	1.32269e-06	Unc13a/Trim9/Syt1/Cacna1b/Doc2b/Cnr1/Sept5/Vamp2/Cacna1c/Unc13c/Erc1/Sptbn2	12
GO:0048489	GO:0048489	BP	synaptic vesicle transport	12/112	190/17943	2.4623e-09	1.61349e-06	1.32269e-06	Unc13a/Trim9/Syt1/Cacna1b/Doc2b/Cnr1/Sept5/Vamp2/Unc13c/Erc1/Sptbn2/Dnm1	12
GO:0097480	GO:0097480	BP	establishment of synaptic vesicle localization	12/112	190/17943	2.4623e-09	1.61349e-06	1.32269e-06	Unc13a/Trim9/Syt1/Cacna1b/Doc2b/Cnr1/Sept5/Vamp2/Unc13c/Erc1/Sptbn2/Dnm1	12
GO:0016079	GO:0016079	BP	synaptic vesicle exocytosis	11/112	153/17943	3.02492e-09	1.61349e-06	1.32269e-06	Unc13a/Trim9/Syt1/Cacna1b/Doc2b/Cnr1/Sept5/Vamp2/Unc13c/Erc1/Sptbn2	11
GO:0001505	GO:0001505	BP	regulation of neurotransmitter levels	16/112	402/17943	4.00646e-09	1.72533e-06	1.41437e-06	Smad3/Unc13a/Trim9/Syt1/Smpd3/Cacna1b/Slc17a7/Doc2b/Cnr1/Sept5/Vamp2/Unc13c/Erc1/Nos1/Nos1ap/Sptbn2	16
GO:0097479	GO:0097479	BP	synaptic vesicle localization	12/112	201/17943	4.66127e-09	1.72533e-06	1.41437e-06	Unc13a/Trim9/Syt1/Cacna1b/Doc2b/Cnr1/Sept5/Vamp2/Unc13c/Erc1/Sptbn2/Dnm1	12
GO:0007269	GO:0007269	BP	neurotransmitter secretion	12/112	204/17943	5.50992e-09	1.72533e-06	1.41437e-06	Unc13a/Trim9/Syt1/Cacna1b/Doc2b/Cnr1/Sept5/Vamp2/Unc13c/Erc1/Nos1ap/Sptbn2	12
GO:0099643	GO:0099643	BP	signal release from synapse	12/112	205/17943	5.82227e-09	1.72533e-06	1.41437e-06	Unc13a/Trim9/Syt1/Cacna1b/Doc2b/Cnr1/Sept5/Vamp2/Unc13c/Erc1/Nos1ap/Sptbn2	12
GO:0099003	GO:0099003	BP	vesicle-mediated transport in synapse	13/112	262/17943	9.58119e-09	2.5553e-06	2.09475e-06	Unc13a/Trim9/Syt1/Cacna1b/Slc17a7/Doc2b/Cnr1/Sept5/Vamp2/Unc13c/Erc1/Sptbn2/Dnm1	13
GO:0006836	GO:0006836	BP	neurotransmitter transport	14/112	322/17943	1.33897e-08	3.2464e-06	2.66129e-06	Unc13a/Trim9/Syt1/Cacna1b/Slc17a7/Doc2b/Cnr1/Sept5/Vamp2/Unc13c/Erc1/Nos1/Nos1ap/Sptbn2	14
GO:0016081	GO:0016081	BP	synaptic vesicle docking	5/112	16/17943	3.58128e-08	7.9594e-06	6.52485e-06	Unc13a/Sept5/Vamp2/Unc13c/Sptbn2	5
GO:0051650	GO:0051650	BP	establishment of vesicle localization	12/112	269/17943	1.17879e-07	2.41834e-05	1.98247e-05	Unc13a/Trim9/Syt1/Cacna1b/Doc2b/Cnr1/Sept5/Vamp2/Unc13c/Erc1/Sptbn2/Dnm1	12
GO:0045055	GO:0045055	BP	regulated exocytosis	12/112	276/17943	1.55718e-07	2.96642e-05	2.43177e-05	Unc13a/Trim9/Syt1/Cacna1b/Doc2b/Cnr1/Sept5/Vamp2/Cacna1c/Unc13c/Erc1/Sptbn2	12
GO:0051648	GO:0051648	BP	vesicle localization	12/112	288/17943	2.46355e-07	4.3802e-05	3.59074e-05	Unc13a/Trim9/Syt1/Cacna1b/Doc2b/Cnr1/Sept5/Vamp2/Unc13c/Erc1/Sptbn2/Dnm1	12
GO:0098693	GO:0098693	BP	regulation of synaptic vesicle cycle	9/112	157/17943	6.08728e-07	0.000101467	8.31795e-05	Unc13a/Syt1/Cacna1b/Slc17a7/Cnr1/Bsn/Sept5/Vamp2/Dnm1	9
GO:0006887	GO:0006887	BP	exocytosis	13/112	391/17943	9.89983e-07	0.000155311	0.000127319	Unc13a/Trim9/Syt1/Smpd3/Cacna1b/Doc2b/Cnr1/Sept5/Vamp2/Cacna1c/Unc13c/Erc1/Sptbn2	13
GO:0003015	GO:0003015	BP	heart process	10/112	224/17943	1.40223e-06	0.000207763	0.000170317	Agtr2/Src/Oxt/Cacna1b/Kcnj8/Cacna1c/Nos1/Nos1ap/Irx5/Dmd	10
GO:0140029	GO:0140029	BP	exocytic process	7/112	92/17943	1.7296e-06	0.000242782	0.000199024	Unc13a/Syt1/Sept5/Vamp2/Unc13c/Erc1/Sptbn2	7
GO:0051656	GO:0051656	BP	establishment of organelle localization	14/112	489/17943	2.16413e-06	0.000288587	0.000236574	Npm1/Unc13a/Trim9/Syt1/Cacna1b/Doc2b/Cnr1/Sept5/Vamp2/Unc13c/Erc1/Sptbn2/Chmp5/Dnm1	14
GO:0008015	GO:0008015	BP	blood circulation	14/112	493/17943	2.37954e-06	0.000292168	0.00023951	Smad3/Agtr2/Smpd3/Oxt/Cacna1b/Cnr1/Kcnj8/Cacna1c/Ppara/Nos1/Cyba/Nos1ap/Irx5/Dmd	14
GO:1903532	GO:1903532	BP	positive regulation of secretion by cell	14/112	495/17943	2.49426e-06	0.000292168	0.00023951	Pcp4/Agtr2/Src/Unc13a/Syt1/Smpd3/Oxt/Grin2b/Cacna1b/Doc2b/Cnr1/Selenok/Sept5/Hk1	14
GO:0001508	GO:0001508	BP	action potential	8/112	139/17943	2.55863e-06	0.000292168	0.00023951	Gna11/Grin2b/Cnr1/Kcnj8/Cacna1c/Nos1ap/Dmd/Foxp1	8
GO:0048278	GO:0048278	BP	vesicle docking	6/112	63/17943	2.62919e-06	0.000292168	0.00023951	Unc13a/Syt1/Sept5/Vamp2/Unc13c/Sptbn2	6
GO:0008217	GO:0008217	BP	regulation of blood pressure	9/112	200/17943	4.52947e-06	0.000483204	0.000396114	Smad3/Agtr2/Oxt/Cacna1b/Cnr1/Cacna1c/Ppara/Nos1/Cyba	9
GO:0017158	GO:0017158	BP	regulation of calcium ion-dependent exocytosis	8/112	151/17943	4.74292e-06	0.000486515	0.000398828	Unc13a/Trim9/Syt1/Cacna1b/Doc2b/Cnr1/Sept5/Sptbn2	8
GO:0015844	GO:0015844	BP	monoamine transport	7/112	110/17943	5.72969e-06	0.000540681	0.000443232	Pcp4/Agtr2/Syt1/Smpd3/Oxt/Cnr1/Nos1	7
GO:0140056	GO:0140056	BP	organelle localization by membrane tethering	6/112	72/17943	5.77664e-06	0.000540681	0.000443232	Unc13a/Syt1/Sept5/Vamp2/Unc13c/Sptbn2	6
GO:0017157	GO:0017157	BP	regulation of exocytosis	10/112	263/17943	5.87917e-06	0.000540681	0.000443232	Unc13a/Trim9/Syt1/Smpd3/Cacna1b/Doc2b/Cnr1/Sept5/Vamp2/Sptbn2	10
GO:0016050	GO:0016050	BP	vesicle organization	10/112	267/17943	6.71429e-06	0.000596901	0.000489319	Bet1/Unc13a/Trim9/Syt1/Slc17a7/Doc2b/Vamp2/Unc13c/Dnm1/Vapa	10
GO:0060047	GO:0060047	BP	heart contraction	9/112	215/17943	8.1399e-06	0.000700294	0.000574077	Agtr2/Oxt/Cacna1b/Kcnj8/Cacna1c/Nos1/Nos1ap/Irx5/Dmd	9
GO:0006904	GO:0006904	BP	vesicle docking involved in exocytosis	5/112	46/17943	9.6817e-06	0.000806909	0.000661477	Unc13a/Sept5/Vamp2/Unc13c/Sptbn2	5
GO:0003012	GO:0003012	BP	muscle system process	12/112	418/17943	1.17926e-05	0.000953055	0.000781282	Npm1/Smad3/Agtr2/Smpd3/Oxt/Kcnj8/Cacna1c/Ppara/Nos1/Cyba/Dmd/Foxp1	12
GO:0022406	GO:0022406	BP	membrane docking	6/112	82/17943	1.23082e-05	0.000965474	0.000791462	Unc13a/Syt1/Sept5/Vamp2/Unc13c/Sptbn2	6
GO:0099171	GO:0099171	BP	presynaptic modulation of chemical synaptic transmission	4/112	24/17943	1.38811e-05	0.00105774	0.000867096	Syt1/Cacna1b/Cnr1/Sept5	4
GO:0008016	GO:0008016	BP	regulation of heart contraction	8/112	185/17943	2.09317e-05	0.00155069	0.0012712	Agtr2/Oxt/Cacna1b/Cacna1c/Nos1/Nos1ap/Irx5/Dmd	8
GO:0051937	GO:0051937	BP	catecholamine transport	6/112	94/17943	2.69363e-05	0.00194159	0.00159165	Pcp4/Agtr2/Syt1/Smpd3/Oxt/Cnr1	6
GO:0050808	GO:0050808	BP	synapse organization	12/112	470/17943	3.74174e-05	0.00261634	0.00214479	Nptx1/Lzts3/Unc13a/Dlgap1/Oxt/Grin2b/Iqsec3/Bsn/Arhgef9/Unc13c/Nos1ap/Sptbn2	12
GO:0002027	GO:0002027	BP	regulation of heart rate	6/112	100/17943	3.82592e-05	0.00261634	0.00214479	Agtr2/Oxt/Cacna1c/Nos1ap/Irx5/Dmd	6
GO:0001956	GO:0001956	BP	positive regulation of neurotransmitter secretion	4/112	31/17943	3.97426e-05	0.00264984	0.00217225	Unc13a/Syt1/Cacna1b/Cnr1	4
GO:1903305	GO:1903305	BP	regulation of regulated secretory pathway	8/112	204/17943	4.21001e-05	0.00273856	0.00224498	Unc13a/Trim9/Syt1/Cacna1b/Doc2b/Cnr1/Sept5/Sptbn2	8
GO:0045956	GO:0045956	BP	positive regulation of calcium ion-dependent exocytosis	4/112	32/17943	4.52023e-05	0.00287035	0.00235301	Syt1/Cacna1b/Doc2b/Cnr1	4
GO:0051480	GO:0051480	BP	regulation of cytosolic calcium ion concentration	11/112	406/17943	4.70998e-05	0.00292128	0.00239477	Smad3/Smpd3/Oxt/Grin2b/Jph4/Cacna1b/Cnr1/Cacna1c/Nos1/Cyba/Dmd	11
GO:0045776	GO:0045776	BP	negative regulation of blood pressure	5/112	64/17943	4.92539e-05	0.00296293	0.00242891	Agtr2/Oxt/Cnr1/Ppara/Nos1	5
GO:0016188	GO:0016188	BP	synaptic vesicle maturation	3/112	12/17943	4.99932e-05	0.00296293	0.00242891	Unc13a/Slc17a7/Unc13c	3
GO:0045921	GO:0045921	BP	positive regulation of exocytosis	6/112	106/17943	5.31182e-05	0.0030797	0.00252463	Syt1/Smpd3/Cacna1b/Doc2b/Cnr1/Sept5	6
GO:0014896	GO:0014896	BP	muscle hypertrophy	6/112	113/17943	7.5942e-05	0.00430931	0.00353262	Npm1/Smad3/Agtr2/Ppara/Cyba/Foxp1	6
GO:0017014	GO:0017014	BP	protein nitrosylation	3/112	14/17943	8.19657e-05	0.00446128	0.0036572	Nos1/Nos1ap/Dmd	3
GO:0018119	GO:0018119	BP	peptidyl-cysteine S-nitrosylation	3/112	14/17943	8.19657e-05	0.00446128	0.0036572	Nos1/Nos1ap/Dmd	3
GO:0050433	GO:0050433	BP	regulation of catecholamine secretion	5/112	74/17943	9.90348e-05	0.00528252	0.00433043	Pcp4/Agtr2/Syt1/Oxt/Cnr1	5
GO:0019318	GO:0019318	BP	hexose metabolic process	8/112	233/17943	0.000106881	0.00558927	0.00458189	Acadm/Src/Pfkfb3/Galt/Cry1/Onecut1/Ppara/Hk1	8
GO:0051952	GO:0051952	BP	regulation of amine transport	6/112	123/17943	0.000121446	0.0062288	0.00510616	Pcp4/Agtr2/Syt1/Oxt/Grin2b/Cnr1	6
GO:2000302	GO:2000302	BP	positive regulation of synaptic vesicle exocytosis	3/112	16/17943	0.000124958	0.0062845	0.00515182	Syt1/Cacna1b/Cnr1	3
GO:0050432	GO:0050432	BP	catecholamine secretion	5/112	78/17943	0.000127245	0.0062845	0.00515182	Pcp4/Agtr2/Syt1/Oxt/Cnr1	5
GO:0015837	GO:0015837	BP	amine transport	6/112	127/17943	0.000144791	0.00702104	0.00575561	Pcp4/Agtr2/Syt1/Oxt/Grin2b/Cnr1	6
GO:1902805	GO:1902805	BP	positive regulation of synaptic vesicle transport	3/112	17/17943	0.000151046	0.00719354	0.00589702	Syt1/Cacna1b/Cnr1	3
GO:0042391	GO:0042391	BP	regulation of membrane potential	11/112	464/17943	0.000154025	0.00720673	0.00590783	Chrm1/Src/Gna11/Grin2b/Slc17a7/Cnr1/Kcnj8/Cacna1c/Nos1ap/Dmd/Foxp1	11
GO:1903522	GO:1903522	BP	regulation of blood circulation	8/112	251/17943	0.000178273	0.0081975	0.00672003	Agtr2/Oxt/Cacna1b/Cacna1c/Nos1/Nos1ap/Irx5/Dmd	8
GO:0051588	GO:0051588	BP	regulation of neurotransmitter transport	7/112	190/17943	0.000189785	0.00857892	0.00703271	Unc13a/Syt1/Cacna1b/Cnr1/Sept5/Unc13c/Nos1	7
GO:0018198	GO:0018198	BP	peptidyl-cysteine modification	4/112	48/17943	0.000226507	0.0100682	0.0082536	Zdhhc23/Nos1/Nos1ap/Dmd	4
GO:0051481	GO:0051481	BP	negative regulation of cytosolic calcium ion concentration	3/112	20/17943	0.000249791	0.0109212	0.00895282	Smad3/Smpd3/Nos1	3
GO:0005996	GO:0005996	BP	monosaccharide metabolic process	8/112	265/17943	0.000257656	0.0110833	0.00908575	Acadm/Src/Pfkfb3/Galt/Cry1/Onecut1/Ppara/Hk1	8
GO:0006906	GO:0006906	BP	vesicle fusion	5/112	91/17943	0.000262856	0.0111276	0.00912201	Bet1/Trim9/Syt1/Doc2b/Vamp2	5
GO:0051235	GO:0051235	BP	maintenance of location	9/112	339/17943	0.000274965	0.0114583	0.00939312	Jph4/Slc17a7/Cry1/Cacna1c/Ppara/Cyba/Hk1/Dmd/Nfkbib	9
GO:0099173	GO:0099173	BP	postsynapse organization	7/112	205/17943	0.000301761	0.0123815	0.0101499	Nptx1/Lzts3/Dlgap1/Grin2b/Arhgef9/Nos1ap/Sptbn2	7
GO:0046928	GO:0046928	BP	regulation of neurotransmitter secretion	6/112	148/17943	0.000331936	0.0132199	0.0108372	Unc13a/Syt1/Cacna1b/Cnr1/Sept5/Unc13c	6
GO:0051590	GO:0051590	BP	positive regulation of neurotransmitter transport	4/112	53/17943	0.000332802	0.0132199	0.0108372	Unc13a/Syt1/Cacna1b/Cnr1	4
GO:0090174	GO:0090174	BP	organelle membrane fusion	5/112	96/17943	0.000337064	0.0132199	0.0108372	Bet1/Trim9/Syt1/Doc2b/Vamp2	5
GO:0086001	GO:0086001	BP	cardiac muscle cell action potential	4/112	57/17943	0.00044042	0.0170232	0.013955	Kcnj8/Cacna1c/Nos1ap/Dmd	4
GO:0016082	GO:0016082	BP	synaptic vesicle priming	3/112	25/17943	0.000492643	0.0185053	0.01517	Unc13a/Unc13c/Erc1	3
GO:0045472	GO:0045472	BP	response to ether	3/112	25/17943	0.000492643	0.0185053	0.01517	Oxt/Grin2b/Foxp1	3
GO:0003300	GO:0003300	BP	cardiac muscle hypertrophy	5/112	107/17943	0.000555265	0.0202862	0.0166299	Npm1/Smad3/Agtr2/Ppara/Foxp1	5
GO:0035249	GO:0035249	BP	synaptic transmission, glutamatergic	5/112	107/17943	0.000555265	0.0202862	0.0166299	Unc13a/Syt1/Slc17a7/Cnr1/Unc13c	5
GO:0015872	GO:0015872	BP	dopamine transport	4/112	61/17943	0.000570816	0.0205725	0.0168647	Pcp4/Syt1/Smpd3/Cnr1	4
GO:0046879	GO:0046879	BP	hormone secretion	9/112	376/17943	0.000583244	0.0207402	0.0170021	Agtr2/Smpd3/Doc2b/Cnr1/Cry1/Vamp2/Sstr5/Cacna1c/Nos1	9
GO:0098900	GO:0098900	BP	regulation of action potential	4/112	62/17943	0.000607271	0.0213104	0.0174696	Cnr1/Cacna1c/Nos1ap/Foxp1	4
GO:0032386	GO:0032386	BP	regulation of intracellular transport	10/112	464/17943	0.000653504	0.0224422	0.0183974	Chrm1/Agtr2/Src/Unc13a/Syt1/Cacna1b/Nolc1/Cnr1/Sept5/Vamp2	10
GO:0014897	GO:0014897	BP	striated muscle hypertrophy	5/112	111/17943	0.000656353	0.0224422	0.0183974	Npm1/Smad3/Agtr2/Ppara/Foxp1	5
GO:0050806	GO:0050806	BP	positive regulation of synaptic transmission	8/112	308/17943	0.000698494	0.0235808	0.0193307	Unc13a/Syt1/Oxt/Grin2b/Cacna1b/Cnr1/Vamp2/Nos1	8
GO:0051291	GO:0051291	BP	protein heterooligomerization	6/112	171/17943	0.000713378	0.0237822	0.0194959	Tnfaip1/Syt1/Kcnab2/Gna11/Grin2b/Prkar2a	6
GO:2000300	GO:2000300	BP	regulation of synaptic vesicle exocytosis	5/112	114/17943	0.000740772	0.0243906	0.0199946	Unc13a/Syt1/Cacna1b/Cnr1/Sept5	5
GO:0009914	GO:0009914	BP	hormone transport	9/112	390/17943	0.000756652	0.0246097	0.0201742	Agtr2/Smpd3/Doc2b/Cnr1/Cry1/Vamp2/Sstr5/Cacna1c/Nos1	9
GO:1901654	GO:1901654	BP	response to ketone	9/112	391/17943	0.000770496	0.024758	0.0202957	Npm1/Agtr2/Src/Oxt/Grin2b/Cacna1b/Cyba/Hk1/Foxp1	9
GO:1902803	GO:1902803	BP	regulation of synaptic vesicle transport	5/112	118/17943	0.000865646	0.0274314	0.0224873	Unc13a/Syt1/Cacna1b/Cnr1/Sept5	5
GO:0042593	GO:0042593	BP	glucose homeostasis	8/112	319/17943	0.00087695	0.0274314	0.0224873	Rps6/Nptx1/Cnr1/Cry1/Sstr5/Cacna1c/Cyba/Hk1	8
GO:0034765	GO:0034765	BP	regulation of ion transmembrane transport	10/112	483/17943	0.000888176	0.0274314	0.0224873	Kcnab2/Cacna1b/Vamp2/Kcnj8/Cacna1c/Nos1/Cyba/Nos1ap/Hk1/Dmd	10
GO:0033500	GO:0033500	BP	carbohydrate homeostasis	8/112	320/17943	0.000894837	0.0274314	0.0224873	Rps6/Nptx1/Cnr1/Cry1/Sstr5/Cacna1c/Cyba/Hk1	8
GO:1903307	GO:1903307	BP	positive regulation of regulated secretory pathway	4/112	69/17943	0.000910131	0.0275832	0.0226117	Syt1/Cacna1b/Doc2b/Cnr1	4
GO:0048284	GO:0048284	BP	organelle fusion	5/112	121/17943	0.000969122	0.029041	0.0238068	Bet1/Trim9/Syt1/Doc2b/Vamp2	5
GO:0048167	GO:0048167	BP	regulation of synaptic plasticity	8/112	327/17943	0.00102843	0.030163	0.0247266	Unc13a/Grin2b/Jph4/Eif4ebp2/Nsmf/Vamp2/Unc13c/Nos1	8
GO:0010614	GO:0010614	BP	negative regulation of cardiac muscle hypertrophy	3/112	32/17943	0.00102918	0.030163	0.0247266	Smad3/Ppara/Foxp1	3
GO:0051188	GO:0051188	BP	cofactor biosynthetic process	7/112	255/17943	0.00110056	0.0319043	0.0261541	Sptb/Tmem14c/Pfkfb3/Galt/Ppara/Cyba/Hk1	7
GO:0006109	GO:0006109	BP	regulation of carbohydrate metabolic process	6/112	188/17943	0.00116617	0.0334426	0.0274151	Acadm/Src/Smpd3/Pfkfb3/Cry1/Ppara	6
GO:0030534	GO:0030534	BP	adult behavior	6/112	189/17943	0.00119838	0.0338313	0.0277337	Sept5/Cacna1c/Ppara/Nos1/Sptbn2/Dnm1	6
GO:0014741	GO:0014741	BP	negative regulation of muscle hypertrophy	3/112	34/17943	0.00123046	0.0338313	0.0277337	Smad3/Ppara/Foxp1	3
GO:1903421	GO:1903421	BP	regulation of synaptic vesicle recycling	3/112	34/17943	0.00123046	0.0338313	0.0277337	Slc17a7/Vamp2/Dnm1	3
GO:1904385	GO:1904385	BP	cellular response to angiotensin	3/112	34/17943	0.00123046	0.0338313	0.0277337	Agtr2/Src/Cyba	3
GO:1903409	GO:1903409	BP	reactive oxygen species biosynthetic process	5/112	128/17943	0.00124611	0.0339119	0.0277998	Smad3/Smpd3/Nos1/Cyba/Nos1ap	5
GO:0018345	GO:0018345	BP	protein palmitoylation	3/112	35/17943	0.00133973	0.0357307	0.0292908	Zdhhc8/Zdhhc23/Selenok	3
GO:0031338	GO:0031338	BP	regulation of vesicle fusion	3/112	35/17943	0.00133973	0.0357307	0.0292908	Trim9/Syt1/Doc2b	3
GO:0001666	GO:0001666	BP	response to hypoxia	9/112	424/17943	0.00135755	0.0358474	0.0293865	Npm1/Smad3/Src/Grin2b/Apaf1/Ppara/Nos1/Cyba/Hk1	9
GO:0015696	GO:0015696	BP	ammonium transport	5/112	131/17943	0.00138118	0.0361138	0.0296048	Pcp4/Syt1/Smpd3/Cnr1/Nos1	5
GO:0070997	GO:0070997	BP	neuron death	9/112	429/17943	0.00147173	0.0381078	0.0312394	Npm1/Pcp4/Src/Grin2b/Apaf1/Nsmf/Ppara/Nos1/Nos1ap	9
GO:0051602	GO:0051602	BP	response to electrical stimulus	4/112	79/17943	0.00150808	0.0382524	0.031358	Src/Oxt/Grin2b/Nsmf	4
GO:0072347	GO:0072347	BP	response to anesthetic	5/112	134/17943	0.00152677	0.0382524	0.031358	Oxt/Grin2b/Cnr1/Nos1/Hk1	5
GO:0015850	GO:0015850	BP	organic hydroxy compound transport	7/112	270/17943	0.00152872	0.0382524	0.031358	Pcp4/Agtr2/Syt1/Smpd3/Oxt/Cnr1/Nos1	7
GO:1901653	GO:1901653	BP	cellular response to peptide	9/112	432/17943	0.00154387	0.0382524	0.031358	Rps6/Agtr2/Src/Smpd3/Eif4ebp2/Vamp2/Cacna1c/Cyba/Chmp5	9
GO:0010959	GO:0010959	BP	regulation of metal ion transport	9/112	433/17943	0.00156854	0.0382524	0.031358	Kcnab2/Jph4/Cacna1b/Vamp2/Cacna1c/Nos1/Cyba/Nos1ap/Dmd	9
GO:0050999	GO:0050999	BP	regulation of nitric-oxide synthase activity	3/112	37/17943	0.00157615	0.0382524	0.031358	Agtr2/Cnr1/Nos1ap	3
GO:0061025	GO:0061025	BP	membrane fusion	5/112	135/17943	0.00157771	0.0382524	0.031358	Bet1/Trim9/Syt1/Doc2b/Vamp2	5
GO:0050890	GO:0050890	BP	cognition	8/112	351/17943	0.00161231	0.038739	0.0317569	Chrm1/Oxt/Grin2b/Jph4/Eif4ebp2/Slc17a7/Cnr1/Cacna1c	8
GO:0036465	GO:0036465	BP	synaptic vesicle recycling	4/112	81/17943	0.00165407	0.0393458	0.0322544	Syt1/Slc17a7/Vamp2/Dnm1	4
GO:0007204	GO:0007204	BP	positive regulation of cytosolic calcium ion concentration	8/112	353/17943	0.00167087	0.0393458	0.0322544	Oxt/Grin2b/Jph4/Cacna1b/Cnr1/Cacna1c/Cyba/Dmd	8
GO:0061669	GO:0061669	BP	spontaneous neurotransmitter secretion	2/112	10/17943	0.00168182	0.0393458	0.0322544	Syt1/Doc2b	2
GO:0006809	GO:0006809	BP	nitric oxide biosynthetic process	4/112	82/17943	0.00173063	0.0394495	0.0323393	Smad3/Smpd3/Nos1/Nos1ap	4
GO:0042220	GO:0042220	BP	response to cocaine	4/112	82/17943	0.00173063	0.0394495	0.0323393	Oxt/Grin2b/Cnr1/Nos1	4
GO:0051705	GO:0051705	BP	multi-organism behavior	4/112	82/17943	0.00173063	0.0394495	0.0323393	Oxt/Grin2b/Eif4ebp2/Sept5	4
GO:0050803	GO:0050803	BP	regulation of synapse structure or activity	7/112	280/17943	0.00187967	0.042382	0.0347433	Nptx1/Lzts3/Oxt/Grin2b/Slc17a7/Arhgef9/Dnm1	7
GO:0006096	GO:0006096	BP	glycolytic process	4/112	84/17943	0.00189106	0.042382	0.0347433	Pfkfb3/Galt/Ppara/Hk1	4
GO:0006816	GO:0006816	BP	calcium ion transport	9/112	446/17943	0.00191916	0.0426532	0.0349657	Grin2b/Jph4/Cacna1b/Selenok/Cacna1c/Nos1/Cyba/Nos1ap/Dmd	9
GO:0006757	GO:0006757	BP	ATP generation from ADP	4/112	85/17943	0.00197501	0.0435319	0.035686	Pfkfb3/Galt/Ppara/Hk1	4
GO:0051924	GO:0051924	BP	regulation of calcium ion transport	7/112	283/17943	0.00199629	0.0436402	0.0357747	Jph4/Cacna1b/Cacna1c/Nos1/Cyba/Nos1ap/Dmd	7
GO:0010881	GO:0010881	BP	regulation of cardiac muscle contraction by regulation of the release of sequestered calcium ion	2/112	11/17943	0.00204719	0.0437479	0.0358631	Cacna1c/Dmd	2
GO:1990504	GO:1990504	BP	dense core granule exocytosis	2/112	11/17943	0.00204719	0.0437479	0.0358631	Unc13a/Unc13c	2
GO:0035418	GO:0035418	BP	protein localization to synapse	4/112	86/17943	0.00206151	0.0437479	0.0358631	Nptx1/Dlgap1/Bsn/Vamp2	4
GO:0062012	GO:0062012	BP	regulation of small molecule metabolic process	8/112	366/17943	0.00209385	0.0437479	0.0358631	Acadm/Src/Smpd3/Pfkfb3/Cnr1/Cry1/Ppara/Nos1	8
GO:0070050	GO:0070050	BP	neuron cellular homeostasis	3/112	41/17943	0.00212361	0.0437479	0.0358631	Cacna1b/Slc17a7/Cnr1	3
GO:0098801	GO:0098801	BP	regulation of renal system process	3/112	41/17943	0.00212361	0.0437479	0.0358631	Agtr2/Oxt/Cyba	3
GO:1990776	GO:1990776	BP	response to angiotensin	3/112	41/17943	0.00212361	0.0437479	0.0358631	Agtr2/Src/Cyba	3
GO:0036293	GO:0036293	BP	response to decreased oxygen levels	9/112	453/17943	0.00213245	0.0437479	0.0358631	Npm1/Smad3/Src/Grin2b/Apaf1/Ppara/Nos1/Cyba/Hk1	9
GO:0046209	GO:0046209	BP	nitric oxide metabolic process	4/112	87/17943	0.0021506	0.0437835	0.0358923	Smad3/Smpd3/Nos1/Nos1ap	4
GO:0071383	GO:0071383	BP	cellular response to steroid hormone stimulus	7/112	288/17943	0.00220305	0.0445117	0.0364892	Agtr2/Src/Grin2b/Cry1/Sstr5/Ppara/Foxp1	7
GO:0042866	GO:0042866	BP	pyruvate biosynthetic process	4/112	88/17943	0.00224231	0.0449641	0.0368601	Pfkfb3/Galt/Ppara/Hk1	4
GO:0002016	GO:0002016	BP	regulation of blood volume by renin-angiotensin	2/112	12/17943	0.00244663	0.047629	0.0390446	Agtr2/Cyba	2
GO:0060405	GO:0060405	BP	regulation of penile erection	2/112	12/17943	0.00244663	0.047629	0.0390446	Oxt/Cnr1	2
GO:0086103	GO:0086103	BP	G protein-coupled receptor signaling pathway involved in heart process	2/112	12/17943	0.00244663	0.047629	0.0390446	Src/Nos1	2
GO:1902514	GO:1902514	BP	regulation of calcium ion transmembrane transport via high voltage-gated calcium channel	2/112	12/17943	0.00244663	0.047629	0.0390446	Cacna1c/Nos1ap	2
GO:0019362	GO:0019362	BP	pyridine nucleotide metabolic process	5/112	150/17943	0.00250103	0.0479873	0.0393384	Kcnab2/Pfkfb3/Galt/Ppara/Hk1	5
GO:0046496	GO:0046496	BP	nicotinamide nucleotide metabolic process	5/112	150/17943	0.00250103	0.0479873	0.0393384	Kcnab2/Pfkfb3/Galt/Ppara/Hk1	5
GO:2001057	GO:2001057	BP	reactive nitrogen species metabolic process	4/112	91/17943	0.00253356	0.0482643	0.0395654	Smad3/Smpd3/Nos1/Nos1ap	4
GO:0097553	GO:0097553	BP	calcium ion transmembrane import into cytosol	5/112	151/17943	0.00257402	0.0486874	0.0399122	Grin2b/Jph4/Cacna1c/Cyba/Dmd	5
GO:0051341	GO:0051341	BP	regulation of oxidoreductase activity	4/112	92/17943	0.00263615	0.0495113	0.0405877	Agtr2/Cnr1/Cyba/Nos1ap	4
GO:1905953	GO:1905953	BP	negative regulation of lipid localization	3/112	45/17943	0.00277619	0.0503231	0.0412532	Agtr2/Cry1/Ppara	3
GO:0019233	GO:0019233	BP	sensory perception of pain	5/112	154/17943	0.0028023	0.0503231	0.0412532	Oxt/Grin2b/Cacna1b/Cnr1/Nos1	5
GO:0046031	GO:0046031	BP	ADP metabolic process	4/112	94/17943	0.00284981	0.0503231	0.0412532	Pfkfb3/Galt/Ppara/Hk1	4
GO:1901214	GO:1901214	BP	regulation of neuron death	8/112	385/17943	0.00285925	0.0503231	0.0412532	Npm1/Pcp4/Src/Grin2b/Nsmf/Ppara/Nos1/Nos1ap	8
GO:0097237	GO:0097237	BP	cellular response to toxic substance	7/112	302/17943	0.00287085	0.0503231	0.0412532	Rps6/Gpx4/Src/Smpd3/Txnrd2/Sptbn2/Foxp1	7
GO:0061052	GO:0061052	BP	negative regulation of cell growth involved in cardiac muscle cell development	2/112	13/17943	0.00287971	0.0503231	0.0412532	Ppara/Foxp1	2
GO:0061577	GO:0061577	BP	calcium ion transmembrane transport via high voltage-gated calcium channel	2/112	13/17943	0.00287971	0.0503231	0.0412532	Cacna1c/Nos1ap	2
GO:0098814	GO:0098814	BP	spontaneous synaptic transmission	2/112	13/17943	0.00287971	0.0503231	0.0412532	Syt1/Doc2b	2
GO:0003298	GO:0003298	BP	physiological muscle hypertrophy	3/112	46/17943	0.0029565	0.0503231	0.0412532	Agtr2/Ppara/Foxp1	3
GO:0003301	GO:0003301	BP	physiological cardiac muscle hypertrophy	3/112	46/17943	0.0029565	0.0503231	0.0412532	Agtr2/Ppara/Foxp1	3
GO:0014046	GO:0014046	BP	dopamine secretion	3/112	46/17943	0.0029565	0.0503231	0.0412532	Pcp4/Syt1/Cnr1	3
GO:0014059	GO:0014059	BP	regulation of dopamine secretion	3/112	46/17943	0.0029565	0.0503231	0.0412532	Pcp4/Syt1/Cnr1	3
GO:0061049	GO:0061049	BP	cell growth involved in cardiac muscle cell development	3/112	46/17943	0.0029565	0.0503231	0.0412532	Agtr2/Ppara/Foxp1	3
GO:0007613	GO:0007613	BP	memory	5/112	156/17943	0.0029624	0.0503231	0.0412532	Oxt/Grin2b/Eif4ebp2/Slc17a7/Cnr1	5
GO:0072524	GO:0072524	BP	pyridine-containing compound metabolic process	5/112	156/17943	0.0029624	0.0503231	0.0412532	Kcnab2/Pfkfb3/Galt/Ppara/Hk1	5
GO:0006913	GO:0006913	BP	nucleocytoplasmic transport	7/112	305/17943	0.00303224	0.0511835	0.0419585	Npm1/Sarnp/Agtr2/Nolc1/Kpna4/Kpna3/Lsg1	7
GO:0051169	GO:0051169	BP	nuclear transport	7/112	306/17943	0.00308756	0.0517895	0.0424552	Npm1/Sarnp/Agtr2/Nolc1/Kpna4/Kpna3/Lsg1	7
GO:0032768	GO:0032768	BP	regulation of monooxygenase activity	3/112	47/17943	0.00314385	0.0524041	0.0429591	Agtr2/Cnr1/Nos1ap	3
GO:0031648	GO:0031648	BP	protein destabilization	3/112	48/17943	0.00333834	0.054959	0.0450535	Npm1/Src/Ctsh	3
GO:0048701	GO:0048701	BP	embryonic cranial skeleton morphogenesis	3/112	48/17943	0.00333834	0.054959	0.0450535	Smad3/Mmp16/Irx5	3
GO:2000116	GO:2000116	BP	regulation of cysteine-type endopeptidase activity	6/112	234/17943	0.00349999	0.0571705	0.0468664	Smad3/Src/Grin2b/Apaf1/Ctsh/Sh3rf1	6
GO:0099084	GO:0099084	BP	postsynaptic specialization organization	3/112	49/17943	0.00354005	0.0571705	0.0468664	Nptx1/Dlgap1/Arhgef9	3
GO:0007611	GO:0007611	BP	learning or memory	7/112	314/17943	0.00355842	0.0571705	0.0468664	Oxt/Grin2b/Jph4/Eif4ebp2/Slc17a7/Cnr1/Cacna1c	7
GO:0070588	GO:0070588	BP	calcium ion transmembrane transport	7/112	314/17943	0.00355842	0.0571705	0.0468664	Grin2b/Jph4/Cacna1b/Cacna1c/Cyba/Nos1ap/Dmd	7
GO:0051260	GO:0051260	BP	protein homooligomerization	8/112	400/17943	0.00360547	0.0575795	0.0472017	Npm1/Acadm/Src/Lzts3/Tnfaip1/Syt1/Smpd3/Apaf1	8
GO:0009135	GO:0009135	BP	purine nucleoside diphosphate metabolic process	4/112	101/17943	0.00369071	0.0582166	0.047724	Pfkfb3/Galt/Ppara/Hk1	4
GO:0009179	GO:0009179	BP	purine ribonucleoside diphosphate metabolic process	4/112	101/17943	0.00369071	0.0582166	0.047724	Pfkfb3/Galt/Ppara/Hk1	4
GO:0007187	GO:0007187	BP	G protein-coupled receptor signaling pathway, coupled to cyclic nucleotide second messenger	6/112	237/17943	0.00372489	0.0582166	0.047724	Chrm1/Agtr2/Gna11/Cnr1/Sstr5/Nos1	6
GO:0070838	GO:0070838	BP	divalent metal ion transport	9/112	494/17943	0.00379173	0.0582166	0.047724	Grin2b/Jph4/Cacna1b/Selenok/Cacna1c/Nos1/Cyba/Nos1ap/Dmd	9
GO:0031340	GO:0031340	BP	positive regulation of vesicle fusion	2/112	15/17943	0.00384508	0.0582166	0.047724	Syt1/Doc2b	2
GO:0035815	GO:0035815	BP	positive regulation of renal sodium excretion	2/112	15/17943	0.00384508	0.0582166	0.047724	Agtr2/Oxt	2
GO:0038166	GO:0038166	BP	angiotensin-activated signaling pathway	2/112	15/17943	0.00384508	0.0582166	0.047724	Agtr2/Src	2
GO:0071362	GO:0071362	BP	cellular response to ether	2/112	15/17943	0.00384508	0.0582166	0.047724	Grin2b/Foxp1	2
GO:0098917	GO:0098917	BP	retrograde trans-synaptic signaling	2/112	15/17943	0.00384508	0.0582166	0.047724	Cnr1/Nos1	2
GO:0006733	GO:0006733	BP	oxidoreduction coenzyme metabolic process	5/112	166/17943	0.00386364	0.0582166	0.047724	Kcnab2/Pfkfb3/Galt/Ppara/Hk1	5
GO:0072511	GO:0072511	BP	divalent inorganic cation transport	9/112	497/17943	0.00394456	0.0589837	0.0483528	Grin2b/Jph4/Cacna1b/Selenok/Cacna1c/Nos1/Cyba/Nos1ap/Dmd	9
GO:0006165	GO:0006165	BP	nucleoside diphosphate phosphorylation	4/112	103/17943	0.00395878	0.0589837	0.0483528	Pfkfb3/Galt/Ppara/Hk1	4
GO:0031960	GO:0031960	BP	response to corticosteroid	7/112	321/17943	0.00401371	0.0594698	0.0487513	Agtr2/Acadm/Src/Oxt/Grin2b/Sstr5/Cyba	7
GO:0009185	GO:0009185	BP	ribonucleoside diphosphate metabolic process	4/112	104/17943	0.00409764	0.059718	0.0489548	Pfkfb3/Galt/Ppara/Hk1	4
GO:0019359	GO:0019359	BP	nicotinamide nucleotide biosynthetic process	4/112	104/17943	0.00409764	0.059718	0.0489548	Pfkfb3/Galt/Ppara/Hk1	4
GO:0019363	GO:0019363	BP	pyridine nucleotide biosynthetic process	4/112	104/17943	0.00409764	0.059718	0.0489548	Pfkfb3/Galt/Ppara/Hk1	4
GO:0045777	GO:0045777	BP	positive regulation of blood pressure	3/112	52/17943	0.00418932	0.0603941	0.049509	Oxt/Cnr1/Cyba	3
GO:0051954	GO:0051954	BP	positive regulation of amine transport	3/112	52/17943	0.00418932	0.0603941	0.049509	Pcp4/Oxt/Grin2b	3
GO:0043255	GO:0043255	BP	regulation of carbohydrate biosynthetic process	4/112	105/17943	0.00423975	0.0604674	0.0495691	Acadm/Smpd3/Cry1/Ppara	4
GO:0046939	GO:0046939	BP	nucleotide phosphorylation	4/112	105/17943	0.00423975	0.0604674	0.0495691	Pfkfb3/Galt/Ppara/Hk1	4
GO:0009612	GO:0009612	BP	response to mechanical stimulus	7/112	326/17943	0.0043651	0.061924	0.0507632	Src/Oxt/Grin2b/Nos1/Cyba/Dmd/Strbp	7
GO:0006111	GO:0006111	BP	regulation of gluconeogenesis	3/112	53/17943	0.00442071	0.0620528	0.0508687	Acadm/Cry1/Ppara	3
GO:1904645	GO:1904645	BP	response to amyloid-beta	3/112	53/17943	0.00442071	0.0620528	0.0508687	Cacna1b/Cacna1c/Dnm1	3
GO:0045471	GO:0045471	BP	response to ethanol	6/112	246/17943	0.00446425	0.0623358	0.0511008	Rps6/Grin2b/Cacna1b/Cnr1/Nos1/Sptbn2	6
GO:0043331	GO:0043331	BP	response to dsRNA	3/112	54/17943	0.00465971	0.0644202	0.0528095	Npm1/Grin2b/Kcnj8	3
GO:0043502	GO:0043502	BP	regulation of muscle adaptation	4/112	108/17943	0.00468598	0.0644202	0.0528095	Smad3/Ppara/Dmd/Foxp1	4
GO:1903426	GO:1903426	BP	regulation of reactive oxygen species biosynthetic process	4/112	108/17943	0.00468598	0.0644202	0.0528095	Smad3/Smpd3/Cyba/Nos1ap	4
GO:0060402	GO:0060402	BP	calcium ion transport into cytosol	5/112	175/17943	0.0048294	0.0652217	0.0534665	Grin2b/Jph4/Cacna1c/Cyba/Dmd	5
GO:0042136	GO:0042136	BP	neurotransmitter biosynthetic process	4/112	109/17943	0.00484148	0.0652217	0.0534665	Smad3/Smpd3/Nos1/Nos1ap	4
GO:0072525	GO:0072525	BP	pyridine-containing compound biosynthetic process	4/112	109/17943	0.00484148	0.0652217	0.0534665	Pfkfb3/Galt/Ppara/Hk1	4
GO:0043270	GO:0043270	BP	positive regulation of ion transport	7/112	333/17943	0.00489563	0.0652217	0.0534665	Chrm1/Pcp4/Oxt/Grin2b/Cacna1c/Nos1/Dmd	7
GO:0010882	GO:0010882	BP	regulation of cardiac muscle contraction by calcium ion signaling	2/112	17/17943	0.00493993	0.0652217	0.0534665	Cacna1c/Dmd	2
GO:0036035	GO:0036035	BP	osteoclast development	2/112	17/17943	0.00493993	0.0652217	0.0534665	Src/Foxp1	2
GO:0043084	GO:0043084	BP	penile erection	2/112	17/17943	0.00493993	0.0652217	0.0534665	Oxt/Cnr1	2
GO:0098962	GO:0098962	BP	regulation of postsynaptic neurotransmitter receptor activity	2/112	17/17943	0.00493993	0.0652217	0.0534665	Nptx1/Src	2
GO:0090257	GO:0090257	BP	regulation of muscle system process	6/112	256/17943	0.00540719	0.0706291	0.0578993	Smad3/Oxt/Cacna1c/Ppara/Dmd/Foxp1	6
GO:0035306	GO:0035306	BP	positive regulation of dephosphorylation	3/112	57/17943	0.00542306	0.0706291	0.0578993	Smad3/Agtr2/Nsmf	3
GO:0006090	GO:0006090	BP	pyruvate metabolic process	4/112	113/17943	0.00549812	0.0706291	0.0578993	Pfkfb3/Galt/Ppara/Hk1	4
GO:0001732	GO:0001732	BP	formation of cytoplasmic translation initiation complex	2/112	18/17943	0.00553486	0.0706291	0.0578993	Eif3h/LOC108348062	2
GO:0048791	GO:0048791	BP	calcium ion-regulated exocytosis of neurotransmitter	2/112	18/17943	0.00553486	0.0706291	0.0578993	Syt1/Doc2b	2
GO:0099150	GO:0099150	BP	regulation of postsynaptic specialization assembly	2/112	18/17943	0.00553486	0.0706291	0.0578993	Nptx1/Arhgef9	2
GO:0150052	GO:0150052	BP	regulation of postsynapse assembly	2/112	18/17943	0.00553486	0.0706291	0.0578993	Nptx1/Arhgef9	2
GO:0071897	GO:0071897	BP	DNA biosynthetic process	5/112	181/17943	0.00556156	0.0706318	0.0579016	Npm1/Src/Smpd3/Pold4/Tinf2	5
GO:0071236	GO:0071236	BP	cellular response to antibiotic	6/112	261/17943	0.00592992	0.0749227	0.0614191	Rps6/Src/Smpd3/Grin2b/Sptbn2/Foxp1	6
GO:0007416	GO:0007416	BP	synapse assembly	5/112	184/17943	0.00595561	0.0749227	0.0614191	Nptx1/Oxt/Bsn/Arhgef9/Sptbn2	5
GO:0097305	GO:0097305	BP	response to alcohol	8/112	437/17943	0.00609457	0.0760704	0.0623599	Rps6/Oxt/Grin2b/Cacna1b/Cnr1/Nos1/Cyba/Sptbn2	8
GO:0033604	GO:0033604	BP	negative regulation of catecholamine secretion	2/112	19/17943	0.00616093	0.0760704	0.0623599	Agtr2/Cnr1	2
GO:0090195	GO:0090195	BP	chemokine secretion	2/112	19/17943	0.00616093	0.0760704	0.0623599	Selenok/Foxp1	2
GO:2000846	GO:2000846	BP	regulation of corticosteroid hormone secretion	2/112	19/17943	0.00616093	0.0760704	0.0623599	Agtr2/Cry1	2
GO:0035176	GO:0035176	BP	social behavior	3/112	60/17943	0.00625732	0.0765517	0.0627545	Oxt/Eif4ebp2/Sept5	3
GO:0051703	GO:0051703	BP	intraspecies interaction between organisms	3/112	60/17943	0.00625732	0.0765517	0.0627545	Oxt/Eif4ebp2/Sept5	3
GO:0001952	GO:0001952	BP	regulation of cell-matrix adhesion	4/112	118/17943	0.00639941	0.0772273	0.0633083	Smad3/Src/Onecut1/Dmd	4
GO:0003014	GO:0003014	BP	renal system process	4/112	118/17943	0.00639941	0.0772273	0.0633083	Agtr2/Oxt/Cacna1c/Cyba	4
GO:0006413	GO:0006413	BP	translational initiation	4/112	118/17943	0.00639941	0.0772273	0.0633083	Npm1/Eif4ebp2/Eif3h/LOC108348062	4
GO:0060401	GO:0060401	BP	cytosolic calcium ion transport	5/112	188/17943	0.00651111	0.0782213	0.0641231	Grin2b/Jph4/Cacna1c/Cyba/Dmd	5
GO:0007588	GO:0007588	BP	excretion	3/112	61/17943	0.00655145	0.078353	0.0642311	Agtr2/Oxt/Cacna1c	3
GO:0051668	GO:0051668	BP	localization within membrane	5/112	189/17943	0.00665548	0.0787137	0.0645268	Nptx1/Grin2b/Vamp2/Arhgef9/Dnm1	5
GO:0060359	GO:0060359	BP	response to ammonium ion	5/112	189/17943	0.00665548	0.0787137	0.0645268	Chrm1/Oxt/Grin2b/Cnr1/Nos1	5
GO:0051048	GO:0051048	BP	negative regulation of secretion	6/112	268/17943	0.00672258	0.0787137	0.0645268	Agtr2/Trim9/Oxt/Cnr1/Cry1/Nos1	6
GO:2001023	GO:2001023	BP	regulation of response to drug	4/112	120/17943	0.00678579	0.0787137	0.0645268	Pcp4/Syt1/Cnr1/Foxp1	4
GO:0032211	GO:0032211	BP	negative regulation of telomere maintenance via telomerase	2/112	20/17943	0.00681773	0.0787137	0.0645268	Src/Tinf2	2
GO:0033605	GO:0033605	BP	positive regulation of catecholamine secretion	2/112	20/17943	0.00681773	0.0787137	0.0645268	Pcp4/Oxt	2
GO:0035930	GO:0035930	BP	corticosteroid hormone secretion	2/112	20/17943	0.00681773	0.0787137	0.0645268	Agtr2/Cry1	2
GO:1900424	GO:1900424	BP	regulation of defense response to bacterium	2/112	20/17943	0.00681773	0.0787137	0.0645268	Cyba/Foxp1	2
GO:1903428	GO:1903428	BP	positive regulation of reactive oxygen species biosynthetic process	3/112	62/17943	0.00685369	0.0787829	0.0645835	Smad3/Smpd3/Cyba	3
GO:1904062	GO:1904062	BP	regulation of cation transmembrane transport	7/112	355/17943	0.00688279	0.0787829	0.0645835	Kcnab2/Vamp2/Cacna1c/Nos1/Cyba/Nos1ap/Dmd	7
GO:0009132	GO:0009132	BP	nucleoside diphosphate metabolic process	4/112	122/17943	0.00718734	0.0815686	0.0668672	Pfkfb3/Galt/Ppara/Hk1	4
GO:1900180	GO:1900180	BP	regulation of protein localization to nucleus	4/112	122/17943	0.00718734	0.0815686	0.0668672	Npm1/Agtr2/Src/Nolc1	4
GO:0034504	GO:0034504	BP	protein localization to nucleus	6/112	273/17943	0.0073341	0.0828815	0.0679434	Npm1/Agtr2/Src/Nolc1/Kpna4/Kpna3	6
GO:0042542	GO:0042542	BP	response to hydrogen peroxide	5/112	194/17943	0.00741115	0.0833989	0.0683676	Src/Smpd3/Kpna4/Txnrd2/Foxp1	5
GO:0014061	GO:0014061	BP	regulation of norepinephrine secretion	2/112	21/17943	0.00750484	0.0837465	0.0686525	Agtr2/Oxt	2
GO:2000726	GO:2000726	BP	negative regulation of cardiac muscle cell differentiation	2/112	21/17943	0.00750484	0.0837465	0.0686525	Ppara/Foxp1	2
GO:0032368	GO:0032368	BP	regulation of lipid transport	4/112	124/17943	0.00760428	0.0845025	0.0692723	Agtr2/Oxt/Cry1/Ppara	4
GO:0010906	GO:0010906	BP	regulation of glucose metabolic process	4/112	125/17943	0.0078186	0.0854395	0.0700404	Acadm/Src/Cry1/Ppara	4
GO:0043500	GO:0043500	BP	muscle adaptation	4/112	125/17943	0.0078186	0.0854395	0.0700404	Smad3/Ppara/Cyba/Foxp1	4
GO:0044070	GO:0044070	BP	regulation of anion transport	4/112	125/17943	0.0078186	0.0854395	0.0700404	Agtr2/Oxt/Grin2b/Hk1	4
GO:0099175	GO:0099175	BP	regulation of postsynapse organization	4/112	125/17943	0.0078186	0.0854395	0.0700404	Nptx1/Lzts3/Grin2b/Arhgef9	4
GO:0045787	GO:0045787	BP	positive regulation of cell cycle	7/112	364/17943	0.00784877	0.0854395	0.0700404	Npm1/Rps15a/Src/Smpd3/Sstr5/Prkar2a/H2afy	7
GO:0031281	GO:0031281	BP	positive regulation of cyclase activity	2/112	22/17943	0.00822189	0.0877111	0.0719026	Cacna1c/Nos1	2
GO:0035493	GO:0035493	BP	SNARE complex assembly	2/112	22/17943	0.00822189	0.0877111	0.0719026	Trim9/Vamp2	2
GO:0048243	GO:0048243	BP	norepinephrine secretion	2/112	22/17943	0.00822189	0.0877111	0.0719026	Agtr2/Oxt	2
GO:0099558	GO:0099558	BP	maintenance of synapse structure	2/112	22/17943	0.00822189	0.0877111	0.0719026	Dlgap1/Bsn	2
GO:1902307	GO:1902307	BP	positive regulation of sodium ion transmembrane transport	2/112	22/17943	0.00822189	0.0877111	0.0719026	Nos1/Dmd	2
GO:0046434	GO:0046434	BP	organophosphate catabolic process	5/112	201/17943	0.00856699	0.0910286	0.0746221	Smpd3/Pfkfb3/Galt/Ppara/Hk1	5
GO:0043954	GO:0043954	BP	cellular component maintenance	3/112	68/17943	0.00884052	0.0930697	0.0762954	Dlgap1/Grin2b/Bsn	3
GO:0006779	GO:0006779	BP	porphyrin-containing compound biosynthetic process	2/112	23/17943	0.00896847	0.0930697	0.0762954	Sptb/Tmem14c	2
GO:0010742	GO:0010742	BP	macrophage derived foam cell differentiation	2/112	23/17943	0.00896847	0.0930697	0.0762954	Selenok/Ppara	2
GO:0032303	GO:0032303	BP	regulation of icosanoid secretion	2/112	23/17943	0.00896847	0.0930697	0.0762954	Agtr2/Oxt	2
GO:0051349	GO:0051349	BP	positive regulation of lyase activity	2/112	23/17943	0.00896847	0.0930697	0.0762954	Cacna1c/Nos1	2
GO:0090077	GO:0090077	BP	foam cell differentiation	2/112	23/17943	0.00896847	0.0930697	0.0762954	Selenok/Ppara	2
GO:0006006	GO:0006006	BP	glucose metabolic process	5/112	204/17943	0.00909859	0.094054	0.0771023	Acadm/Src/Cry1/Onecut1/Ppara	5
GO:1904888	GO:1904888	BP	cranial skeletal system development	3/112	69/17943	0.00920099	0.0947454	0.077669	Smad3/Mmp16/Irx5	3
GO:0072594	GO:0072594	BP	establishment of protein localization to organelle	7/112	376/17943	0.00928851	0.0948459	0.0777514	Agtr2/Nolc1/Kpna4/Kpna3/Hk1/H2afy/Timm21	7
GO:0030072	GO:0030072	BP	peptide hormone secretion	6/112	288/17943	0.00941008	0.0948459	0.0777514	Smpd3/Doc2b/Cnr1/Sstr5/Cacna1c/Nos1	6
GO:0009166	GO:0009166	BP	nucleotide catabolic process	4/112	132/17943	0.00943074	0.0948459	0.0777514	Pfkfb3/Galt/Ppara/Hk1	4
GO:0051209	GO:0051209	BP	release of sequestered calcium ion into cytosol	4/112	132/17943	0.00943074	0.0948459	0.0777514	Jph4/Cacna1c/Cyba/Dmd	4
GO:0048488	GO:0048488	BP	synaptic vesicle endocytosis	3/112	70/17943	0.00956996	0.0948459	0.0777514	Syt1/Slc17a7/Dnm1	3
GO:0051385	GO:0051385	BP	response to mineralocorticoid	3/112	70/17943	0.00956996	0.0948459	0.0777514	Src/Grin2b/Cyba	3
GO:0140238	GO:0140238	BP	presynaptic endocytosis	3/112	70/17943	0.00956996	0.0948459	0.0777514	Syt1/Slc17a7/Dnm1	3
GO:0009755	GO:0009755	BP	hormone-mediated signaling pathway	5/112	207/17943	0.00965258	0.0948459	0.0777514	Src/Cry1/Sstr5/Ppara/Foxp1	5
GO:0006754	GO:0006754	BP	ATP biosynthetic process	4/112	133/17943	0.00967737	0.0948459	0.0777514	Pfkfb3/Galt/Ppara/Hk1	4
GO:0014823	GO:0014823	BP	response to activity	4/112	133/17943	0.00967737	0.0948459	0.0777514	Oxt/Cry1/Nos1/Cyba	4
GO:0010499	GO:0010499	BP	proteasomal ubiquitin-independent protein catabolic process	2/112	24/17943	0.00974419	0.0948459	0.0777514	Psma1/Psmb8	2
GO:0033014	GO:0033014	BP	tetrapyrrole biosynthetic process	2/112	24/17943	0.00974419	0.0948459	0.0777514	Sptb/Tmem14c	2
GO:0099509	GO:0099509	BP	regulation of presynaptic cytosolic calcium ion concentration	2/112	24/17943	0.00974419	0.0948459	0.0777514	Cacna1b/Cnr1	2
GO:0099625	GO:0099625	BP	ventricular cardiac muscle cell membrane repolarization	2/112	24/17943	0.00974419	0.0948459	0.0777514	Kcnj8/Nos1ap	2
GO:1901889	GO:1901889	BP	negative regulation of cell junction assembly	2/112	24/17943	0.00974419	0.0948459	0.0777514	Rps6/Src	2
GO:0007188	GO:0007188	BP	adenylate cyclase-modulating G protein-coupled receptor signaling pathway	5/112	208/17943	0.00984229	0.0953837	0.0781923	Chrm1/Gna11/Cnr1/Sstr5/Nos1	5
GO:0044262	GO:0044262	BP	cellular carbohydrate metabolic process	6/112	291/17943	0.00987098	0.0953837	0.0781923	Acadm/Src/Pfkfb3/Cry1/Ppara/Hk1	6
GO:0051283	GO:0051283	BP	negative regulation of sequestering of calcium ion	4/112	134/17943	0.00992816	0.0955899	0.0783613	Jph4/Cacna1c/Cyba/Dmd	4
GO:0043281	GO:0043281	BP	regulation of cysteine-type endopeptidase activity involved in apoptotic process	5/112	209/17943	0.0100346	0.0962668	0.0789163	Smad3/Src/Apaf1/Ctsh/Sh3rf1	5
GO:1902115	GO:1902115	BP	regulation of organelle assembly	5/112	210/17943	0.0102294	0.0966781	0.0792534	Npm1/Nptx1/Src/Arhgef9/Chmp5	5
GO:0045428	GO:0045428	BP	regulation of nitric oxide biosynthetic process	3/112	72/17943	0.0103335	0.0966781	0.0792534	Smad3/Smpd3/Nos1ap	3
GO:0017038	GO:0017038	BP	protein import	5/112	211/17943	0.0104268	0.0966781	0.0792534	Agtr2/Nolc1/Kpna4/Kpna3/Timm21	5
GO:0042157	GO:0042157	BP	lipoprotein metabolic process	4/112	136/17943	0.0104423	0.0966781	0.0792534	Zdhhc8/Zdhhc23/Selenok/Ppara	4
GO:0051282	GO:0051282	BP	regulation of sequestering of calcium ion	4/112	136/17943	0.0104423	0.0966781	0.0792534	Jph4/Cacna1c/Cyba/Dmd	4
GO:2001056	GO:2001056	BP	positive regulation of cysteine-type endopeptidase activity	4/112	136/17943	0.0104423	0.0966781	0.0792534	Smad3/Grin2b/Apaf1/Ctsh	4
GO:0000302	GO:0000302	BP	response to reactive oxygen species	6/112	295/17943	0.0105103	0.0966781	0.0792534	Src/Smpd3/Kpna4/Nos1/Txnrd2/Foxp1	6
GO:0035813	GO:0035813	BP	regulation of renal sodium excretion	2/112	25/17943	0.0105487	0.0966781	0.0792534	Agtr2/Oxt	2
GO:0046835	GO:0046835	BP	carbohydrate phosphorylation	2/112	25/17943	0.0105487	0.0966781	0.0792534	Pfkfb3/Hk1	2
GO:0048025	GO:0048025	BP	negative regulation of mRNA splicing, via spliceosome	2/112	25/17943	0.0105487	0.0966781	0.0792534	Npm1/Rnps1	2
GO:1902884	GO:1902884	BP	positive regulation of response to oxidative stress	2/112	25/17943	0.0105487	0.0966781	0.0792534	H2afy/Foxp1	2
GO:1905208	GO:1905208	BP	negative regulation of cardiocyte differentiation	2/112	25/17943	0.0105487	0.0966781	0.0792534	Ppara/Foxp1	2
GO:2000831	GO:2000831	BP	regulation of steroid hormone secretion	2/112	25/17943	0.0105487	0.0966781	0.0792534	Agtr2/Cry1	2
GO:0051208	GO:0051208	BP	sequestering of calcium ion	4/112	137/17943	0.0107057	0.0976525	0.0800522	Jph4/Cacna1c/Cyba/Dmd	4
GO:0010611	GO:0010611	BP	regulation of cardiac muscle hypertrophy	3/112	73/17943	0.0107282	0.0976525	0.0800522	Smad3/Ppara/Foxp1	3
GO:0010880	GO:0010880	BP	regulation of release of sequestered calcium ion into cytosol by sarcoplasmic reticulum	2/112	26/17943	0.0113815	0.102897	0.0843513	Cacna1c/Dmd	2
GO:0015874	GO:0015874	BP	norepinephrine transport	2/112	26/17943	0.0113815	0.102897	0.0843513	Agtr2/Oxt	2
GO:0032388	GO:0032388	BP	positive regulation of intracellular transport	5/112	216/17943	0.0114532	0.103195	0.084596	Chrm1/Syt1/Cacna1b/Cnr1/Vamp2	5
GO:0006919	GO:0006919	BP	activation of cysteine-type endopeptidase activity involved in apoptotic process	3/112	75/17943	0.0115436	0.103659	0.084976	Smad3/Apaf1/Ctsh	3
GO:1901292	GO:1901292	BP	nucleoside phosphate catabolic process	4/112	141/17943	0.0118023	0.103982	0.0852412	Pfkfb3/Galt/Ppara/Hk1	4
GO:0035265	GO:0035265	BP	organ growth	5/112	218/17943	0.0118825	0.103982	0.0852412	Agtr2/Smpd3/Cacna1c/Ppara/Foxp1	5
GO:0014743	GO:0014743	BP	regulation of muscle hypertrophy	3/112	76/17943	0.0119643	0.103982	0.0852412	Smad3/Ppara/Foxp1	3
GO:0030808	GO:0030808	BP	regulation of nucleotide biosynthetic process	3/112	76/17943	0.0119643	0.103982	0.0852412	Pfkfb3/Ppara/Nos1	3
GO:0051193	GO:0051193	BP	regulation of cofactor metabolic process	3/112	76/17943	0.0119643	0.103982	0.0852412	Tmem14c/Pfkfb3/Ppara	3
GO:0061515	GO:0061515	BP	myeloid cell development	3/112	76/17943	0.0119643	0.103982	0.0852412	Rps6/Src/Foxp1	3
GO:1900371	GO:1900371	BP	regulation of purine nucleotide biosynthetic process	3/112	76/17943	0.0119643	0.103982	0.0852412	Pfkfb3/Ppara/Nos1	3
GO:0003071	GO:0003071	BP	renal system process involved in regulation of systemic arterial blood pressure	2/112	27/17943	0.0122424	0.103982	0.0852412	Agtr2/Cyba	2
GO:0007620	GO:0007620	BP	copulation	2/112	27/17943	0.0122424	0.103982	0.0852412	Oxt/Cnr1	2
GO:0035812	GO:0035812	BP	renal sodium excretion	2/112	27/17943	0.0122424	0.103982	0.0852412	Agtr2/Oxt	2
GO:0045730	GO:0045730	BP	respiratory burst	2/112	27/17943	0.0122424	0.103982	0.0852412	Selenok/Cyba	2
GO:0071359	GO:0071359	BP	cellular response to dsRNA	2/112	27/17943	0.0122424	0.103982	0.0852412	Npm1/Grin2b	2
GO:0085029	GO:0085029	BP	extracellular matrix assembly	2/112	27/17943	0.0122424	0.103982	0.0852412	Smad3/Smpd3	2
GO:0098698	GO:0098698	BP	postsynaptic specialization assembly	2/112	27/17943	0.0122424	0.103982	0.0852412	Nptx1/Arhgef9	2
GO:1900242	GO:1900242	BP	regulation of synaptic vesicle endocytosis	2/112	27/17943	0.0122424	0.103982	0.0852412	Slc17a7/Dnm1	2
GO:1903861	GO:1903861	BP	positive regulation of dendrite extension	2/112	27/17943	0.0122424	0.103982	0.0852412	Unc13a/Syt1	2
GO:1904357	GO:1904357	BP	negative regulation of telomere maintenance via telomere lengthening	2/112	27/17943	0.0122424	0.103982	0.0852412	Src/Tinf2	2
GO:0010810	GO:0010810	BP	regulation of cell-substrate adhesion	5/112	220/17943	0.0123225	0.10433	0.0855266	Smad3/Src/Onecut1/Hsd17b12/Dmd	5
GO:0009206	GO:0009206	BP	purine ribonucleoside triphosphate biosynthetic process	4/112	143/17943	0.0123767	0.104458	0.085631	Pfkfb3/Galt/Ppara/Hk1	4
GO:0006936	GO:0006936	BP	muscle contraction	6/112	306/17943	0.0124196	0.104489	0.0856569	Smpd3/Oxt/Kcnj8/Cacna1c/Nos1/Dmd	6
GO:0051402	GO:0051402	BP	neuron apoptotic process	6/112	307/17943	0.0126045	0.105272	0.0862982	Npm1/Pcp4/Src/Apaf1/Nsmf/Nos1	6
GO:0007346	GO:0007346	BP	regulation of mitotic cell cycle	8/112	497/17943	0.0126682	0.105272	0.0862982	Smad3/Rps6/Smpd3/Syf2/Bex4/Tipin/H2afy/Chmp5	8
GO:0009145	GO:0009145	BP	purine nucleoside triphosphate biosynthetic process	4/112	144/17943	0.0126705	0.105272	0.0862982	Pfkfb3/Galt/Ppara/Hk1	4
GO:0016052	GO:0016052	BP	carbohydrate catabolic process	4/112	144/17943	0.0126705	0.105272	0.0862982	Pfkfb3/Galt/Ppara/Hk1	4
GO:0006094	GO:0006094	BP	gluconeogenesis	3/112	78/17943	0.0128319	0.105482	0.0864705	Acadm/Cry1/Ppara	3
GO:0035094	GO:0035094	BP	response to nicotine	3/112	78/17943	0.0128319	0.105482	0.0864705	Cnr1/Ppara/Nos1	3
GO:0048168	GO:0048168	BP	regulation of neuronal synaptic plasticity	3/112	78/17943	0.0128319	0.105482	0.0864705	Unc13a/Grin2b/Nsmf	3
GO:0031333	GO:0031333	BP	negative regulation of protein complex assembly	4/112	145/17943	0.0129687	0.105482	0.0864705	Sptb/Src/Trim9/Sptbn2	4
GO:0003081	GO:0003081	BP	regulation of systemic arterial blood pressure by renin-angiotensin	2/112	28/17943	0.0131309	0.105482	0.0864705	Agtr2/Cyba	2
GO:0009649	GO:0009649	BP	entrainment of circadian clock	2/112	28/17943	0.0131309	0.105482	0.0864705	Chrm1/Cry1	2
GO:0035929	GO:0035929	BP	steroid hormone secretion	2/112	28/17943	0.0131309	0.105482	0.0864705	Agtr2/Cry1	2
GO:0045822	GO:0045822	BP	negative regulation of heart contraction	2/112	28/17943	0.0131309	0.105482	0.0864705	Agtr2/Nos1	2
GO:0060384	GO:0060384	BP	innervation	2/112	28/17943	0.0131309	0.105482	0.0864705	Nptx1/Unc13a	2
GO:0070198	GO:0070198	BP	protein localization to chromosome, telomeric region	2/112	28/17943	0.0131309	0.105482	0.0864705	Tinf2/H2afy	2
GO:0098901	GO:0098901	BP	regulation of cardiac muscle cell action potential	2/112	28/17943	0.0131309	0.105482	0.0864705	Cacna1c/Nos1ap	2
GO:0032651	GO:0032651	BP	regulation of interleukin-1 beta production	3/112	79/17943	0.0132789	0.106351	0.0871829	Smad3/Hk1/Foxp1	3
GO:0009410	GO:0009410	BP	response to xenobiotic stimulus	7/112	404/17943	0.0133905	0.106924	0.0876523	Agtr2/Oxt/Grin2b/Cnr1/Nos1/Prkar2a/Hk1	7
GO:0050707	GO:0050707	BP	regulation of cytokine secretion	5/112	225/17943	0.0134708	0.107244	0.0879146	Agtr2/Src/Selenok/Hk1/Foxp1	5
GO:0010639	GO:0010639	BP	negative regulation of organelle organization	7/112	405/17943	0.0135577	0.107614	0.0882184	Npm1/Sptb/Src/Trim9/Tinf2/H2afy/Sptbn2	7
GO:0019319	GO:0019319	BP	hexose biosynthetic process	3/112	80/17943	0.0137347	0.108696	0.0891052	Acadm/Cry1/Ppara	3
GO:0055007	GO:0055007	BP	cardiac muscle cell differentiation	4/112	148/17943	0.0138902	0.109219	0.0895344	Agtr2/Acadm/Ppara/Foxp1	4
GO:0014808	GO:0014808	BP	release of sequestered calcium ion into cytosol by sarcoplasmic reticulum	2/112	29/17943	0.0140466	0.109219	0.0895344	Cacna1c/Dmd	2
GO:0019048	GO:0019048	BP	modulation by virus of host morphology or physiology	2/112	29/17943	0.0140466	0.109219	0.0895344	Smad3/Vapa	2
GO:0032026	GO:0032026	BP	response to magnesium ion	2/112	29/17943	0.0140466	0.109219	0.0895344	Smpd3/Grin2b	2
GO:0033137	GO:0033137	BP	negative regulation of peptidyl-serine phosphorylation	2/112	29/17943	0.0140466	0.109219	0.0895344	Nos1/Dmd	2
GO:1900273	GO:1900273	BP	positive regulation of long-term synaptic potentiation	2/112	29/17943	0.0140466	0.109219	0.0895344	Grin2b/Nos1	2
GO:0030073	GO:0030073	BP	insulin secretion	5/112	228/17943	0.0141934	0.109774	0.0899893	Doc2b/Cnr1/Sstr5/Cacna1c/Nos1	5
GO:0009201	GO:0009201	BP	ribonucleoside triphosphate biosynthetic process	4/112	149/17943	0.0142063	0.109774	0.0899893	Pfkfb3/Galt/Ppara/Hk1	4
GO:0060249	GO:0060249	BP	anatomical structure homeostasis	7/112	409/17943	0.0142414	0.109774	0.0899893	Src/Cacna1b/Slc17a7/Ctsh/Cnr1/Tinf2/Dmd	7
GO:0046883	GO:0046883	BP	regulation of hormone secretion	6/112	316/17943	0.0143568	0.110344	0.0904566	Agtr2/Doc2b/Cnr1/Cry1/Sstr5/Nos1	6
GO:0006606	GO:0006606	BP	protein import into nucleus	4/112	150/17943	0.014527	0.111332	0.0912662	Agtr2/Nolc1/Kpna4/Kpna3	4
GO:0032890	GO:0032890	BP	regulation of organic acid transport	3/112	82/17943	0.0146729	0.111807	0.0916557	Agtr2/Oxt/Grin2b	3
GO:0033143	GO:0033143	BP	regulation of intracellular steroid hormone receptor signaling pathway	3/112	82/17943	0.0146729	0.111807	0.0916557	Src/Cry1/Foxp1	3
GO:0034655	GO:0034655	BP	nucleobase-containing compound catabolic process	7/112	413/17943	0.0149496	0.111978	0.0917959	Npm1/Apaf1/Pfkfb3/Rnps1/Galt/Ppara/Hk1	7
GO:0033119	GO:0033119	BP	negative regulation of RNA splicing	2/112	30/17943	0.0149892	0.111978	0.0917959	Npm1/Rnps1	2
GO:0048011	GO:0048011	BP	neurotrophin TRK receptor signaling pathway	2/112	30/17943	0.0149892	0.111978	0.0917959	Agtr2/Src	2
GO:0061050	GO:0061050	BP	regulation of cell growth involved in cardiac muscle cell development	2/112	30/17943	0.0149892	0.111978	0.0917959	Ppara/Foxp1	2
GO:0086005	GO:0086005	BP	ventricular cardiac muscle cell action potential	2/112	30/17943	0.0149892	0.111978	0.0917959	Kcnj8/Cacna1c	2
GO:1903514	GO:1903514	BP	release of sequestered calcium ion into cytosol by endoplasmic reticulum	2/112	30/17943	0.0149892	0.111978	0.0917959	Cacna1c/Dmd	2
GO:1903859	GO:1903859	BP	regulation of dendrite extension	2/112	30/17943	0.0149892	0.111978	0.0917959	Unc13a/Syt1	2
GO:1905952	GO:1905952	BP	regulation of lipid localization	4/112	153/17943	0.0155165	0.115594	0.0947598	Agtr2/Oxt/Cry1/Ppara	4
GO:0097366	GO:0097366	BP	response to bronchodilator	3/112	84/17943	0.0156465	0.11597	0.0950679	Oxt/Grin2b/Nos1	3
GO:0052548	GO:0052548	BP	regulation of endopeptidase activity	7/112	417/17943	0.0156827	0.11597	0.0950679	Smad3/Src/Grin2b/Apaf1/Ctsh/Sh3rf1/Psmb8	7
GO:0002183	GO:0002183	BP	cytoplasmic translational initiation	2/112	31/17943	0.0159583	0.11597	0.0950679	Eif3h/LOC108348062	2
GO:0009303	GO:0009303	BP	rRNA transcription	2/112	31/17943	0.0159583	0.11597	0.0950679	Npm1/H2afy	2
GO:0032369	GO:0032369	BP	negative regulation of lipid transport	2/112	31/17943	0.0159583	0.11597	0.0950679	Agtr2/Cry1	2
GO:0044062	GO:0044062	BP	regulation of excretion	2/112	31/17943	0.0159583	0.11597	0.0950679	Agtr2/Oxt	2
GO:0055022	GO:0055022	BP	negative regulation of cardiac muscle tissue growth	2/112	31/17943	0.0159583	0.11597	0.0950679	Ppara/Foxp1	2
GO:0061117	GO:0061117	BP	negative regulation of heart growth	2/112	31/17943	0.0159583	0.11597	0.0950679	Ppara/Foxp1	2
GO:0099622	GO:0099622	BP	cardiac muscle cell membrane repolarization	2/112	31/17943	0.0159583	0.11597	0.0950679	Kcnj8/Nos1ap	2
GO:0033574	GO:0033574	BP	response to testosterone	3/112	85/17943	0.0161467	0.117019	0.0959286	Npm1/Cacna1b/Foxp1	3
GO:0051170	GO:0051170	BP	import into nucleus	4/112	155/17943	0.0161992	0.117082	0.0959801	Agtr2/Nolc1/Kpna4/Kpna3	4
GO:0015893	GO:0015893	BP	drug transport	5/112	236/17943	0.0162468	0.117109	0.096002	Pcp4/Syt1/Smpd3/Slc17a7/Cnr1	5
GO:0032868	GO:0032868	BP	response to insulin	6/112	326/17943	0.0164958	0.118456	0.0971061	Rps6/Src/Eif4ebp2/Cry1/Vamp2/Ppara	6
GO:0042133	GO:0042133	BP	neurotransmitter metabolic process	4/112	156/17943	0.0165476	0.118456	0.0971061	Smad3/Smpd3/Nos1/Nos1ap	4
GO:0006091	GO:0006091	BP	generation of precursor metabolites and energy	7/112	422/17943	0.0166346	0.118456	0.0971061	Acadm/Pfkfb3/Galt/Ppara/Cyba/Txnrd2/Hk1	7
GO:0046364	GO:0046364	BP	monosaccharide biosynthetic process	3/112	86/17943	0.0166558	0.118456	0.0971061	Acadm/Cry1/Ppara	3
GO:0070252	GO:0070252	BP	actin-mediated cell contraction	3/112	86/17943	0.0166558	0.118456	0.0971061	Kcnj8/Cacna1c/Nos1	3
GO:0001958	GO:0001958	BP	endochondral ossification	2/112	32/17943	0.0169536	0.119301	0.0977992	Smpd3/Mmp16	2
GO:0006471	GO:0006471	BP	protein ADP-ribosylation	2/112	32/17943	0.0169536	0.119301	0.0977992	Art3/Tinf2	2
GO:0036075	GO:0036075	BP	replacement ossification	2/112	32/17943	0.0169536	0.119301	0.0977992	Smpd3/Mmp16	2
GO:0099068	GO:0099068	BP	postsynapse assembly	2/112	32/17943	0.0169536	0.119301	0.0977992	Nptx1/Arhgef9	2
GO:1903531	GO:1903531	BP	negative regulation of secretion by cell	5/112	239/17943	0.0170654	0.119772	0.0981851	Agtr2/Trim9/Cnr1/Cry1/Nos1	5
GO:0051279	GO:0051279	BP	regulation of release of sequestered calcium ion into cytosol	3/112	87/17943	0.0171738	0.120217	0.0985496	Cacna1c/Cyba/Dmd	3
GO:0010950	GO:0010950	BP	positive regulation of endopeptidase activity	4/112	158/17943	0.0172583	0.120492	0.0987751	Smad3/Grin2b/Apaf1/Ctsh	4
GO:0007292	GO:0007292	BP	female gamete generation	4/112	159/17943	0.0176207	0.121433	0.0995464	Ncaph2/Rps6/Src/Prkar2a	4
GO:0009127	GO:0009127	BP	purine nucleoside monophosphate biosynthetic process	4/112	159/17943	0.0176207	0.121433	0.0995464	Pfkfb3/Galt/Ppara/Hk1	4
GO:0009168	GO:0009168	BP	purine ribonucleoside monophosphate biosynthetic process	4/112	159/17943	0.0176207	0.121433	0.0995464	Pfkfb3/Galt/Ppara/Hk1	4
GO:0010675	GO:0010675	BP	regulation of cellular carbohydrate metabolic process	4/112	159/17943	0.0176207	0.121433	0.0995464	Acadm/Src/Cry1/Ppara	4
GO:0050715	GO:0050715	BP	positive regulation of cytokine secretion	4/112	159/17943	0.0176207	0.121433	0.0995464	Agtr2/Src/Selenok/Hk1	4
GO:1901888	GO:1901888	BP	regulation of cell junction assembly	3/112	88/17943	0.0177008	0.12167	0.0997411	Smad3/Rps6/Src	3
GO:0043900	GO:0043900	BP	regulation of multi-organism process	7/112	428/17943	0.0178303	0.121981	0.0999957	Oxt/Cnr1/Selenok/Cyba/Prkar2a/Foxp1/Vapa	7
GO:0017004	GO:0017004	BP	cytochrome complex assembly	2/112	33/17943	0.0179747	0.121981	0.0999957	Cyba/Timm21	2
GO:0044003	GO:0044003	BP	modification by symbiont of host morphology or physiology	2/112	33/17943	0.0179747	0.121981	0.0999957	Smad3/Vapa	2
GO:0050686	GO:0050686	BP	negative regulation of mRNA processing	2/112	33/17943	0.0179747	0.121981	0.0999957	Npm1/Rnps1	2
GO:2000191	GO:2000191	BP	regulation of fatty acid transport	2/112	33/17943	0.0179747	0.121981	0.0999957	Agtr2/Oxt	2
GO:0021675	GO:0021675	BP	nerve development	3/112	89/17943	0.0182368	0.123445	0.101196	Nptx1/Unc13a/Dmd	3
GO:0009142	GO:0009142	BP	nucleoside triphosphate biosynthetic process	4/112	161/17943	0.0183597	0.123963	0.101621	Pfkfb3/Galt/Ppara/Hk1	4
GO:2000243	GO:2000243	BP	positive regulation of reproductive process	3/112	90/17943	0.0187817	0.126492	0.103694	Src/Oxt/Prkar2a	3
GO:0002861	GO:0002861	BP	regulation of inflammatory response to antigenic stimulus	2/112	34/17943	0.0190212	0.127461	0.104488	Psma1/Cnr1	2
GO:0010922	GO:0010922	BP	positive regulation of phosphatase activity	2/112	34/17943	0.0190212	0.127461	0.104488	Smad3/Agtr2	2
GO:0043401	GO:0043401	BP	steroid hormone mediated signaling pathway	4/112	163/17943	0.0191178	0.127787	0.104756	Src/Cry1/Ppara/Foxp1	4
GO:0001558	GO:0001558	BP	regulation of cell growth	7/112	435/17943	0.0193007	0.128599	0.105421	Npm1/Smad3/Unc13a/Syt1/Ppara/Cyba/Foxp1	7
GO:0032611	GO:0032611	BP	interleukin-1 beta production	3/112	91/17943	0.0193356	0.128599	0.105421	Smad3/Hk1/Foxp1	3
GO:1903169	GO:1903169	BP	regulation of calcium ion transmembrane transport	4/112	164/17943	0.019504	0.129396	0.106074	Cacna1c/Cyba/Nos1ap/Dmd	4
GO:0006778	GO:0006778	BP	porphyrin-containing compound metabolic process	2/112	35/17943	0.0200928	0.132315	0.108467	Sptb/Tmem14c	2
GO:0046320	GO:0046320	BP	regulation of fatty acid oxidation	2/112	35/17943	0.0200928	0.132315	0.108467	Cnr1/Ppara	2
GO:0070296	GO:0070296	BP	sarcoplasmic reticulum calcium ion transport	2/112	35/17943	0.0200928	0.132315	0.108467	Cacna1c/Dmd	2
GO:0031503	GO:0031503	BP	protein-containing complex localization	5/112	250/17943	0.0203002	0.133351	0.109317	Npm1/Sarnp/Nptx1/Vamp2/Dnm1	5
GO:0006497	GO:0006497	BP	protein lipidation	3/112	93/17943	0.0204704	0.134139	0.109963	Zdhhc8/Zdhhc23/Selenok	3
GO:1901215	GO:1901215	BP	negative regulation of neuron death	5/112	251/17943	0.0206128	0.134741	0.110456	Npm1/Pcp4/Ppara/Nos1/Nos1ap	5
GO:0098751	GO:0098751	BP	bone cell development	2/112	36/17943	0.0211891	0.13817	0.113267	Src/Foxp1	2
GO:0006164	GO:0006164	BP	purine nucleotide biosynthetic process	5/112	253/17943	0.0212475	0.138212	0.113302	Pfkfb3/Galt/Ppara/Nos1/Hk1	5
GO:0006941	GO:0006941	BP	striated muscle contraction	4/112	169/17943	0.0215074	0.139563	0.114409	Kcnj8/Cacna1c/Nos1/Dmd	4
GO:0010498	GO:0010498	BP	proteasomal protein catabolic process	7/112	447/17943	0.0220164	0.141877	0.116306	Dnajb9/Trim9/Tnfaip1/Dlgap1/Psma1/Fbxl16/Psmb8	7
GO:0050663	GO:0050663	BP	cytokine secretion	5/112	256/17943	0.0222233	0.141877	0.116306	Agtr2/Src/Selenok/Hk1/Foxp1	5
GO:0032652	GO:0032652	BP	regulation of interleukin-1 production	3/112	96/17943	0.0222401	0.141877	0.116306	Smad3/Hk1/Foxp1	3
GO:0032205	GO:0032205	BP	negative regulation of telomere maintenance	2/112	37/17943	0.0223099	0.141877	0.116306	Src/Tinf2	2
GO:0051953	GO:0051953	BP	negative regulation of amine transport	2/112	37/17943	0.0223099	0.141877	0.116306	Agtr2/Cnr1	2
GO:0009156	GO:0009156	BP	ribonucleoside monophosphate biosynthetic process	4/112	171/17943	0.0223429	0.141877	0.116306	Pfkfb3/Galt/Ppara/Hk1	4
GO:0034404	GO:0034404	BP	nucleobase-containing small molecule biosynthetic process	4/112	171/17943	0.0223429	0.141877	0.116306	Pfkfb3/Galt/Ppara/Hk1	4
GO:0035296	GO:0035296	BP	regulation of tube diameter	4/112	171/17943	0.0223429	0.141877	0.116306	Agtr2/Smpd3/Cacna1c/Nos1	4
GO:0097746	GO:0097746	BP	regulation of blood vessel diameter	4/112	171/17943	0.0223429	0.141877	0.116306	Agtr2/Smpd3/Cacna1c/Nos1	4
GO:0099072	GO:0099072	BP	regulation of postsynaptic membrane neurotransmitter receptor levels	3/112	97/17943	0.022848	0.144661	0.118588	Nptx1/Vamp2/Dnm1	3
GO:0090068	GO:0090068	BP	positive regulation of cell cycle process	5/112	258/17943	0.0228897	0.144661	0.118588	Npm1/Smpd3/Sstr5/Prkar2a/H2afy	5
GO:0052547	GO:0052547	BP	regulation of peptidase activity	7/112	452/17943	0.0232228	0.146419	0.120029	Smad3/Src/Grin2b/Apaf1/Ctsh/Sh3rf1/Psmb8	7
GO:0051693	GO:0051693	BP	actin filament capping	2/112	38/17943	0.0234547	0.146904	0.120427	Sptb/Sptbn2	2
GO:0019395	GO:0019395	BP	fatty acid oxidation	3/112	98/17943	0.023465	0.146904	0.120427	Acadm/Cnr1/Ppara	3
GO:0048477	GO:0048477	BP	oogenesis	3/112	98/17943	0.023465	0.146904	0.120427	Rps6/Src/Prkar2a	3
GO:0072522	GO:0072522	BP	purine-containing compound biosynthetic process	5/112	260/17943	0.0235691	0.14721	0.120678	Pfkfb3/Galt/Ppara/Nos1/Hk1	5
GO:0019932	GO:0019932	BP	second-messenger-mediated signaling	7/112	455/17943	0.0239682	0.149073	0.122205	Grin2b/Eif4ebp2/Selenok/Cacna1c/Nos1/Prkar2a/Dmd	7
GO:0010952	GO:0010952	BP	positive regulation of peptidase activity	4/112	175/17943	0.0240726	0.149073	0.122205	Smad3/Grin2b/Apaf1/Ctsh	4
GO:0042158	GO:0042158	BP	lipoprotein biosynthetic process	3/112	99/17943	0.0240909	0.149073	0.122205	Zdhhc8/Zdhhc23/Selenok	3
GO:1902749	GO:1902749	BP	regulation of cell cycle G2/M phase transition	3/112	99/17943	0.0240909	0.149073	0.122205	Npm1/Syf2/H2afy	3
GO:0051222	GO:0051222	BP	positive regulation of protein transport	7/112	456/17943	0.0242203	0.149527	0.122577	Chrm1/Agtr2/Src/Doc2b/Selenok/Vamp2/Hk1	7
GO:0072330	GO:0072330	BP	monocarboxylic acid biosynthetic process	5/112	263/17943	0.0246124	0.151313	0.124042	Pfkfb3/Galt/Hsd17b12/Ppara/Hk1	5
GO:0033144	GO:0033144	BP	negative regulation of intracellular steroid hormone receptor signaling pathway	2/112	39/17943	0.0246232	0.151313	0.124042	Cry1/Foxp1	2
GO:0034440	GO:0034440	BP	lipid oxidation	3/112	100/17943	0.0247258	0.151595	0.124272	Acadm/Cnr1/Ppara	3
GO:0050727	GO:0050727	BP	regulation of inflammatory response	6/112	358/17943	0.0248035	0.151723	0.124377	Smad3/Gpx4/Psma1/Cnr1/Ppara/Foxp1	6
GO:0031644	GO:0031644	BP	regulation of neurological system process	4/112	177/17943	0.0249672	0.152374	0.124911	Nptx1/Src/Oxt/Nos1	4
GO:0044270	GO:0044270	BP	cellular nitrogen compound catabolic process	7/112	460/17943	0.0252471	0.15373	0.126023	Npm1/Apaf1/Pfkfb3/Rnps1/Galt/Ppara/Hk1	7
GO:0030038	GO:0030038	BP	contractile actin filament bundle assembly	3/112	101/17943	0.0253698	0.153775	0.12606	Smad3/Src/Tnfaip1	3
GO:0043149	GO:0043149	BP	stress fiber assembly	3/112	101/17943	0.0253698	0.153775	0.12606	Smad3/Src/Tnfaip1	3
GO:0031279	GO:0031279	BP	regulation of cyclase activity	2/112	40/17943	0.0258151	0.154716	0.126831	Cacna1c/Nos1	2
GO:0042311	GO:0042311	BP	vasodilation	2/112	40/17943	0.0258151	0.154716	0.126831	Agtr2/Nos1	2
GO:0071361	GO:0071361	BP	cellular response to ethanol	2/112	40/17943	0.0258151	0.154716	0.126831	Rps6/Sptbn2	2
GO:1901385	GO:1901385	BP	regulation of voltage-gated calcium channel activity	2/112	40/17943	0.0258151	0.154716	0.126831	Nos1ap/Dmd	2
GO:2001025	GO:2001025	BP	positive regulation of response to drug	2/112	40/17943	0.0258151	0.154716	0.126831	Pcp4/Foxp1	2
GO:0071375	GO:0071375	BP	cellular response to peptide hormone stimulus	6/112	362/17943	0.0260079	0.155522	0.127492	Rps6/Agtr2/Src/Eif4ebp2/Vamp2/Cyba	6
GO:0045786	GO:0045786	BP	negative regulation of cell cycle	7/112	464/17943	0.0263034	0.156588	0.128365	Npm1/Smad3/Rps6/Syf2/Tipin/Cry1/H2afy	7
GO:0046700	GO:0046700	BP	heterocycle catabolic process	7/112	464/17943	0.0263034	0.156588	0.128365	Npm1/Apaf1/Pfkfb3/Rnps1/Galt/Ppara/Hk1	7
GO:0048588	GO:0048588	BP	developmental cell growth	5/112	268/17943	0.0264166	0.156911	0.12863	Agtr2/Unc13a/Syt1/Ppara/Foxp1	5
GO:0050886	GO:0050886	BP	endocrine process	3/112	103/17943	0.0266846	0.157575	0.129174	Agtr2/Cry1/Cyba	3
GO:0009124	GO:0009124	BP	nucleoside monophosphate biosynthetic process	4/112	181/17943	0.0268161	0.157575	0.129174	Pfkfb3/Galt/Ppara/Hk1	4
GO:0050880	GO:0050880	BP	regulation of blood vessel size	4/112	181/17943	0.0268161	0.157575	0.129174	Agtr2/Smpd3/Cacna1c/Nos1	4
GO:0048265	GO:0048265	BP	response to pain	2/112	41/17943	0.02703	0.157575	0.129174	Grin2b/Cacna1b	2
GO:0097484	GO:0097484	BP	dendrite extension	2/112	41/17943	0.02703	0.157575	0.129174	Unc13a/Syt1	2
GO:0050807	GO:0050807	BP	regulation of synapse organization	5/112	270/17943	0.0271614	0.157575	0.129174	Nptx1/Lzts3/Oxt/Grin2b/Arhgef9	5
GO:0051348	GO:0051348	BP	negative regulation of transferase activity	5/112	270/17943	0.0271614	0.157575	0.129174	Npm1/Pcp4/Src/Prkar2a/H2afy	5
GO:0035051	GO:0035051	BP	cardiocyte differentiation	4/112	182/17943	0.0272908	0.157575	0.129174	Agtr2/Acadm/Ppara/Foxp1	4
GO:0035150	GO:0035150	BP	regulation of tube size	4/112	182/17943	0.0272908	0.157575	0.129174	Agtr2/Smpd3/Cacna1c/Nos1	4
GO:2000241	GO:2000241	BP	regulation of reproductive process	4/112	182/17943	0.0272908	0.157575	0.129174	Src/Oxt/Cnr1/Prkar2a	4
GO:0033555	GO:0033555	BP	multicellular organismal response to stress	3/112	104/17943	0.0273555	0.157575	0.129174	Grin2b/Cacna1b/Nos1	3
GO:0045778	GO:0045778	BP	positive regulation of ossification	3/112	104/17943	0.0273555	0.157575	0.129174	Smad3/Oxt/Zhx3	3
GO:0055013	GO:0055013	BP	cardiac muscle cell development	3/112	104/17943	0.0273555	0.157575	0.129174	Agtr2/Ppara/Foxp1	3
GO:1900542	GO:1900542	BP	regulation of purine nucleotide metabolic process	3/112	104/17943	0.0273555	0.157575	0.129174	Pfkfb3/Ppara/Nos1	3
GO:0046394	GO:0046394	BP	carboxylic acid biosynthetic process	6/112	367/17943	0.0275675	0.15759	0.129187	Smpd3/Pfkfb3/Galt/Hsd17b12/Ppara/Hk1	6
GO:0042310	GO:0042310	BP	vasoconstriction	3/112	105/17943	0.0280354	0.15759	0.129187	Smpd3/Cacna1c/Nos1	3
GO:0048704	GO:0048704	BP	embryonic skeletal system morphogenesis	3/112	105/17943	0.0280354	0.15759	0.129187	Smad3/Mmp16/Irx5	3
GO:0062014	GO:0062014	BP	negative regulation of small molecule metabolic process	3/112	105/17943	0.0280354	0.15759	0.129187	Smpd3/Cnr1/Cry1	3
GO:0016053	GO:0016053	BP	organic acid biosynthetic process	6/112	369/17943	0.0282083	0.15759	0.129187	Smpd3/Pfkfb3/Galt/Hsd17b12/Ppara/Hk1	6
GO:0043279	GO:0043279	BP	response to alkaloid	4/112	184/17943	0.0282553	0.15759	0.129187	Oxt/Grin2b/Cnr1/Nos1	4
GO:0001990	GO:0001990	BP	regulation of systemic arterial blood pressure by hormone	2/112	42/17943	0.0282677	0.15759	0.129187	Agtr2/Cyba	2
GO:0006110	GO:0006110	BP	regulation of glycolytic process	2/112	42/17943	0.0282677	0.15759	0.129187	Pfkfb3/Ppara	2
GO:0007616	GO:0007616	BP	long-term memory	2/112	42/17943	0.0282677	0.15759	0.129187	Grin2b/Slc17a7	2
GO:0010765	GO:0010765	BP	positive regulation of sodium ion transport	2/112	42/17943	0.0282677	0.15759	0.129187	Nos1/Dmd	2
GO:0010824	GO:0010824	BP	regulation of centrosome duplication	2/112	42/17943	0.0282677	0.15759	0.129187	Npm1/Chmp5	2
GO:0035307	GO:0035307	BP	positive regulation of protein dephosphorylation	2/112	42/17943	0.0282677	0.15759	0.129187	Agtr2/Nsmf	2
GO:0038179	GO:0038179	BP	neurotrophin signaling pathway	2/112	42/17943	0.0282677	0.15759	0.129187	Agtr2/Src	2
GO:0055026	GO:0055026	BP	negative regulation of cardiac muscle tissue development	2/112	42/17943	0.0282677	0.15759	0.129187	Ppara/Foxp1	2
GO:2000279	GO:2000279	BP	negative regulation of DNA biosynthetic process	2/112	42/17943	0.0282677	0.15759	0.129187	Src/Tinf2	2
GO:0043523	GO:0043523	BP	regulation of neuron apoptotic process	5/112	273/17943	0.0283035	0.15759	0.129187	Npm1/Pcp4/Src/Nsmf/Nos1	5
GO:0050678	GO:0050678	BP	regulation of epithelial cell proliferation	6/112	371/17943	0.028859	0.160348	0.131448	Npm1/Smad3/Pold4/Tinf2/Cyba/Foxp1	6
GO:0043902	GO:0043902	BP	positive regulation of multi-organism process	4/112	186/17943	0.02924	0.160715	0.131749	Oxt/Cyba/Prkar2a/Vapa	4
GO:1904951	GO:1904951	BP	positive regulation of establishment of protein localization	7/112	475/17943	0.0293639	0.160715	0.131749	Chrm1/Agtr2/Src/Doc2b/Selenok/Vamp2/Hk1	7
GO:0030048	GO:0030048	BP	actin filament-based movement	3/112	107/17943	0.029422	0.160715	0.131749	Kcnj8/Cacna1c/Nos1	3
GO:0030811	GO:0030811	BP	regulation of nucleotide catabolic process	2/112	43/17943	0.0295278	0.160715	0.131749	Pfkfb3/Ppara	2
GO:0030835	GO:0030835	BP	negative regulation of actin filament depolymerization	2/112	43/17943	0.0295278	0.160715	0.131749	Sptb/Sptbn2	2
GO:0051339	GO:0051339	BP	regulation of lyase activity	2/112	43/17943	0.0295278	0.160715	0.131749	Cacna1c/Nos1	2
GO:0086002	GO:0086002	BP	cardiac muscle cell action potential involved in contraction	2/112	43/17943	0.0295278	0.160715	0.131749	Kcnj8/Cacna1c	2
GO:0086009	GO:0086009	BP	membrane repolarization	2/112	43/17943	0.0295278	0.160715	0.131749	Kcnj8/Nos1ap	2
GO:0097106	GO:0097106	BP	postsynaptic density organization	2/112	43/17943	0.0295278	0.160715	0.131749	Nptx1/Dlgap1	2
GO:1903523	GO:1903523	BP	negative regulation of blood circulation	2/112	43/17943	0.0295278	0.160715	0.131749	Agtr2/Nos1	2
GO:0019439	GO:0019439	BP	aromatic compound catabolic process	7/112	476/17943	0.0296536	0.161072	0.132041	Npm1/Apaf1/Pfkfb3/Rnps1/Galt/Ppara/Hk1	7
GO:0000075	GO:0000075	BP	cell cycle checkpoint	4/112	187/17943	0.0297399	0.161212	0.132156	Rps6/Syf2/Tipin/Cry1	4
GO:0030098	GO:0030098	BP	lymphocyte differentiation	6/112	374/17943	0.0298534	0.161499	0.132392	Ncaph2/Rps6/Dnajb9/Onecut1/Sh3rf1/Foxp1	6
GO:0006140	GO:0006140	BP	regulation of nucleotide metabolic process	3/112	108/17943	0.0301288	0.16233	0.133073	Pfkfb3/Ppara/Nos1	3
GO:0055017	GO:0055017	BP	cardiac muscle tissue growth	3/112	108/17943	0.0301288	0.16233	0.133073	Agtr2/Ppara/Foxp1	3
GO:2001235	GO:2001235	BP	positive regulation of apoptotic signaling pathway	4/112	188/17943	0.0302449	0.162627	0.133316	Smad3/Agtr2/Apaf1/Ctsh	4
GO:0033013	GO:0033013	BP	tetrapyrrole metabolic process	2/112	44/17943	0.0308099	0.163543	0.134067	Sptb/Tmem14c	2
GO:0045740	GO:0045740	BP	positive regulation of DNA replication	2/112	44/17943	0.0308099	0.163543	0.134067	Npm1/Tnfaip1	2
GO:0046621	GO:0046621	BP	negative regulation of organ growth	2/112	44/17943	0.0308099	0.163543	0.134067	Ppara/Foxp1	2
GO:0051154	GO:0051154	BP	negative regulation of striated muscle cell differentiation	2/112	44/17943	0.0308099	0.163543	0.134067	Ppara/Foxp1	2
GO:0098781	GO:0098781	BP	ncRNA transcription	2/112	44/17943	0.0308099	0.163543	0.134067	Npm1/H2afy	2
GO:0032612	GO:0032612	BP	interleukin-1 production	3/112	109/17943	0.0308444	0.163543	0.134067	Smad3/Hk1/Foxp1	3
GO:0055006	GO:0055006	BP	cardiac cell development	3/112	109/17943	0.0308444	0.163543	0.134067	Agtr2/Ppara/Foxp1	3
GO:0060562	GO:0060562	BP	epithelial tube morphogenesis	6/112	378/17943	0.0312142	0.165143	0.135379	Smad3/Agtr2/Src/Apaf1/Ctsh/Foxp1	6
GO:0050796	GO:0050796	BP	regulation of insulin secretion	4/112	190/17943	0.03127	0.165143	0.135379	Doc2b/Cnr1/Sstr5/Nos1	4
GO:0043161	GO:0043161	BP	proteasome-mediated ubiquitin-dependent protein catabolic process	6/112	380/17943	0.0319096	0.168188	0.137874	Dnajb9/Trim9/Tnfaip1/Psma1/Fbxl16/Psmb8	6
GO:0000077	GO:0000077	BP	DNA damage checkpoint	3/112	111/17943	0.0323025	0.169255	0.13875	Syf2/Tipin/Cry1	3
GO:0006275	GO:0006275	BP	regulation of DNA replication	3/112	111/17943	0.0323025	0.169255	0.13875	Npm1/Tnfaip1/Tipin	3
GO:0030518	GO:0030518	BP	intracellular steroid hormone receptor signaling pathway	3/112	111/17943	0.0323025	0.169255	0.13875	Src/Cry1/Foxp1	3
GO:0048661	GO:0048661	BP	positive regulation of smooth muscle cell proliferation	3/112	112/17943	0.0330449	0.172806	0.14166	Smpd3/Cyba/Foxp1	3
GO:1902893	GO:1902893	BP	regulation of pri-miRNA transcription by RNA polymerase II	2/112	46/17943	0.0334391	0.174525	0.143069	Smad3/Ppara	2
GO:0010522	GO:0010522	BP	regulation of calcium ion transport into cytosol	3/112	113/17943	0.0337962	0.175018	0.143474	Cacna1c/Cyba/Dmd	3
GO:0043266	GO:0043266	BP	regulation of potassium ion transport	3/112	113/17943	0.0337962	0.175018	0.143474	Kcnab2/Vamp2/Nos1	3
GO:0097756	GO:0097756	BP	negative regulation of blood vessel diameter	3/112	113/17943	0.0337962	0.175018	0.143474	Smpd3/Cacna1c/Nos1	3
GO:2000379	GO:2000379	BP	positive regulation of reactive oxygen species metabolic process	3/112	113/17943	0.0337962	0.175018	0.143474	Smad3/Smpd3/Cyba	3
GO:0010907	GO:0010907	BP	positive regulation of glucose metabolic process	2/112	47/17943	0.0347856	0.179445	0.147103	Src/Ppara	2
GO:0045429	GO:0045429	BP	positive regulation of nitric oxide biosynthetic process	2/112	47/17943	0.0347856	0.179445	0.147103	Smad3/Smpd3	2
GO:0009108	GO:0009108	BP	coenzyme biosynthetic process	4/112	198/17943	0.0355743	0.181756	0.148997	Pfkfb3/Galt/Ppara/Hk1	4
GO:0016051	GO:0016051	BP	carbohydrate biosynthetic process	4/112	198/17943	0.0355743	0.181756	0.148997	Acadm/Smpd3/Cry1/Ppara	4
GO:0055002	GO:0055002	BP	striated muscle cell development	4/112	198/17943	0.0355743	0.181756	0.148997	Agtr2/Ppara/Dmd/Foxp1	4
GO:0060291	GO:0060291	BP	long-term synaptic potentiation	4/112	198/17943	0.0355743	0.181756	0.148997	Unc13a/Grin2b/Vamp2/Nos1	4
GO:1901655	GO:1901655	BP	cellular response to ketone	4/112	198/17943	0.0355743	0.181756	0.148997	Npm1/Agtr2/Src/Grin2b	4
GO:0006939	GO:0006939	BP	smooth muscle contraction	3/112	116/17943	0.0361031	0.184007	0.150843	Smpd3/Oxt/Cacna1c	3
GO:1903115	GO:1903115	BP	regulation of actin filament-based movement	2/112	48/17943	0.0361528	0.184007	0.150843	Cacna1c/Nos1	2
GO:0032496	GO:0032496	BP	response to lipopolysaccharide	7/112	498/17943	0.0365249	0.185547	0.152105	Src/Cnr1/Kcnj8/Nos1/Chmp5/Nfkbib/Foxp1	7
GO:0060419	GO:0060419	BP	heart growth	3/112	117/17943	0.0368898	0.187044	0.153332	Agtr2/Ppara/Foxp1	3
GO:0072593	GO:0072593	BP	reactive oxygen species metabolic process	5/112	294/17943	0.0371538	0.188025	0.154136	Smad3/Smpd3/Nos1/Cyba/Nos1ap	5
GO:0032892	GO:0032892	BP	positive regulation of organic acid transport	2/112	49/17943	0.0375406	0.189264	0.155152	Oxt/Grin2b	2
GO:1904407	GO:1904407	BP	positive regulation of nitric oxide metabolic process	2/112	49/17943	0.0375406	0.189264	0.155152	Smad3/Smpd3	2
GO:0006970	GO:0006970	BP	response to osmotic stress	3/112	118/17943	0.0376852	0.189277	0.155163	Pcp4/Oxt/Nolc1	3
GO:0071385	GO:0071385	BP	cellular response to glucocorticoid stimulus	3/112	118/17943	0.0376852	0.189277	0.155163	Agtr2/Grin2b/Sstr5	3
GO:0031032	GO:0031032	BP	actomyosin structure organization	4/112	202/17943	0.0378491	0.189743	0.155545	Smad3/Src/Tnfaip1/Foxp1	4
GO:0018105	GO:0018105	BP	peptidyl-serine phosphorylation	5/112	296/17943	0.038076	0.190523	0.156184	Src/Sbk1/Nos1/Hk1/Dmd	5
GO:0043280	GO:0043280	BP	positive regulation of cysteine-type endopeptidase activity involved in apoptotic process	3/112	119/17943	0.0384893	0.192135	0.157506	Smad3/Apaf1/Ctsh	3
GO:0051384	GO:0051384	BP	response to glucocorticoid	5/112	297/17943	0.0385424	0.192135	0.157506	Agtr2/Acadm/Oxt/Grin2b/Sstr5	5
GO:0032309	GO:0032309	BP	icosanoid secretion	2/112	50/17943	0.0389486	0.193418	0.158558	Agtr2/Oxt	2
GO:2000725	GO:2000725	BP	regulation of cardiac muscle cell differentiation	2/112	50/17943	0.0389486	0.193418	0.158558	Ppara/Foxp1	2
GO:0043112	GO:0043112	BP	receptor metabolic process	4/112	204/17943	0.0390172	0.193418	0.158558	Ppara/Chmp5/Dmd/Dnm1	4
GO:0046620	GO:0046620	BP	regulation of organ growth	3/112	120/17943	0.0393022	0.194109	0.159124	Cacna1c/Ppara/Foxp1	3
GO:0051963	GO:0051963	BP	regulation of synapse assembly	3/112	120/17943	0.0393022	0.194109	0.159124	Nptx1/Oxt/Arhgef9	3
GO:0003044	GO:0003044	BP	regulation of systemic arterial blood pressure mediated by a chemical signal	2/112	51/17943	0.0403765	0.198313	0.16257	Agtr2/Cyba	2
GO:0032941	GO:0032941	BP	secretion by tissue	2/112	51/17943	0.0403765	0.198313	0.16257	Chrm1/Cyba	2
GO:0050706	GO:0050706	BP	regulation of interleukin-1 beta secretion	2/112	51/17943	0.0403765	0.198313	0.16257	Hk1/Foxp1	2
GO:2000278	GO:2000278	BP	regulation of DNA biosynthetic process	3/112	122/17943	0.0409542	0.200781	0.164593	Npm1/Src/Tinf2	3
GO:0001503	GO:0001503	BP	ossification	6/112	404/17943	0.0410523	0.200893	0.164685	Smad3/Pcp4/Smpd3/Oxt/Zhx3/Mmp16	6
GO:0031570	GO:0031570	BP	DNA integrity checkpoint	3/112	123/17943	0.0417932	0.203056	0.166459	Syf2/Tipin/Cry1	3
GO:0007618	GO:0007618	BP	mating	2/112	52/17943	0.041824	0.203056	0.166459	Oxt/Cnr1	2
GO:0030834	GO:0030834	BP	regulation of actin filament depolymerization	2/112	52/17943	0.041824	0.203056	0.166459	Sptb/Sptbn2	2
GO:0051196	GO:0051196	BP	regulation of coenzyme metabolic process	2/112	52/17943	0.041824	0.203056	0.166459	Pfkfb3/Ppara	2
GO:0003018	GO:0003018	BP	vascular process in circulatory system	4/112	209/17943	0.0420274	0.203056	0.166459	Agtr2/Smpd3/Cacna1c/Nos1	4
GO:0007160	GO:0007160	BP	cell-matrix adhesion	4/112	209/17943	0.0420274	0.203056	0.166459	Smad3/Src/Onecut1/Dmd	4
GO:2000377	GO:2000377	BP	regulation of reactive oxygen species metabolic process	4/112	209/17943	0.0420274	0.203056	0.166459	Smad3/Smpd3/Cyba/Nos1ap	4
GO:0055001	GO:0055001	BP	muscle cell development	4/112	211/17943	0.0432674	0.207283	0.169923	Agtr2/Ppara/Dmd/Foxp1	4
GO:0009268	GO:0009268	BP	response to pH	2/112	53/17943	0.0432908	0.207283	0.169923	Src/Gna11	2
GO:0032094	GO:0032094	BP	response to food	2/112	53/17943	0.0432908	0.207283	0.169923	Oxt/Ppara	2
GO:0061614	GO:0061614	BP	pri-miRNA transcription by RNA polymerase II	2/112	53/17943	0.0432908	0.207283	0.169923	Smad3/Ppara	2
GO:1900271	GO:1900271	BP	regulation of long-term synaptic potentiation	2/112	53/17943	0.0432908	0.207283	0.169923	Grin2b/Nos1	2
GO:0071384	GO:0071384	BP	cellular response to corticosteroid stimulus	3/112	125/17943	0.0434972	0.207898	0.170427	Agtr2/Grin2b/Sstr5	3
GO:0060048	GO:0060048	BP	cardiac muscle contraction	3/112	126/17943	0.044362	0.211652	0.173505	Kcnj8/Cacna1c/Dmd	3
GO:0001975	GO:0001975	BP	response to amphetamine	2/112	54/17943	0.0447766	0.211736	0.173574	Oxt/Grin2b	2
GO:0032731	GO:0032731	BP	positive regulation of interleukin-1 beta production	2/112	54/17943	0.0447766	0.211736	0.173574	Smad3/Hk1	2
GO:0043470	GO:0043470	BP	regulation of carbohydrate catabolic process	2/112	54/17943	0.0447766	0.211736	0.173574	Pfkfb3/Ppara	2
GO:0045912	GO:0045912	BP	negative regulation of carbohydrate metabolic process	2/112	54/17943	0.0447766	0.211736	0.173574	Smpd3/Cry1	2
GO:0090329	GO:0090329	BP	regulation of DNA-dependent DNA replication	2/112	54/17943	0.0447766	0.211736	0.173574	Npm1/Tipin	2
GO:0042752	GO:0042752	BP	regulation of circadian rhythm	3/112	127/17943	0.0452355	0.212774	0.174425	Chrm1/Cry1/Ppara	3
GO:0070301	GO:0070301	BP	cellular response to hydrogen peroxide	3/112	127/17943	0.0452355	0.212774	0.174425	Src/Smpd3/Foxp1	3
GO:1901216	GO:1901216	BP	positive regulation of neuron death	3/112	127/17943	0.0452355	0.212774	0.174425	Src/Grin2b/Nos1	3
GO:0006469	GO:0006469	BP	negative regulation of protein kinase activity	4/112	215/17943	0.045809	0.215038	0.176281	Npm1/Pcp4/Prkar2a/H2afy	4
GO:0007631	GO:0007631	BP	feeding behavior	3/112	128/17943	0.0461175	0.215038	0.176281	Oxt/Grin2b/Cnr1	3
GO:0070542	GO:0070542	BP	response to fatty acid	3/112	128/17943	0.0461175	0.215038	0.176281	Src/Oxt/Foxp1	3
GO:0032210	GO:0032210	BP	regulation of telomere maintenance via telomerase	2/112	55/17943	0.0462811	0.215038	0.176281	Src/Tinf2	2
GO:0055078	GO:0055078	BP	sodium ion homeostasis	2/112	55/17943	0.0462811	0.215038	0.176281	Agtr2/Oxt	2
GO:0071715	GO:0071715	BP	icosanoid transport	2/112	55/17943	0.0462811	0.215038	0.176281	Agtr2/Oxt	2
GO:1901571	GO:1901571	BP	fatty acid derivative transport	2/112	55/17943	0.0462811	0.215038	0.176281	Agtr2/Oxt	2
GO:0035725	GO:0035725	BP	sodium ion transmembrane transport	3/112	129/17943	0.047008	0.217662	0.178432	Slc17a7/Nos1/Dmd	3
GO:0021700	GO:0021700	BP	developmental maturation	5/112	314/17943	0.0470091	0.217662	0.178432	Unc13a/Slc17a7/Unc13c/Prkar2a/Irx5	5
GO:0001933	GO:0001933	BP	negative regulation of protein phosphorylation	6/112	419/17943	0.0475327	0.219705	0.180106	Npm1/Pcp4/Nos1/Prkar2a/H2afy/Dmd	6
GO:0051353	GO:0051353	BP	positive regulation of oxidoreductase activity	2/112	56/17943	0.0478041	0.219816	0.180198	Agtr2/Cyba	2
GO:0051932	GO:0051932	BP	synaptic transmission, GABAergic	2/112	56/17943	0.0478041	0.219816	0.180198	Cnr1/Dnm1	2
GO:1903539	GO:1903539	BP	protein localization to postsynaptic membrane	2/112	56/17943	0.0478041	0.219816	0.180198	Nptx1/Vamp2	2
GO:0046717	GO:0046717	BP	acid secretion	3/112	130/17943	0.047907	0.219911	0.180275	Agtr2/Oxt/Grin2b	3
GO:0050714	GO:0050714	BP	positive regulation of protein secretion	5/112	316/17943	0.0480725	0.220291	0.180587	Agtr2/Src/Doc2b/Selenok/Hk1	5
GO:2001233	GO:2001233	BP	regulation of apoptotic signaling pathway	6/112	421/17943	0.0484421	0.221604	0.181663	Smad3/Agtr2/Src/Apaf1/Ctsh/Sh3rf1	6
GO:0030183	GO:0030183	BP	B cell differentiation	3/112	131/17943	0.0488145	0.222925	0.182746	Dnajb9/Onecut1/Foxp1	3
GO:0001954	GO:0001954	BP	positive regulation of cell-matrix adhesion	2/112	57/17943	0.0493452	0.223816	0.183477	Smad3/Dmd	2
GO:0030042	GO:0030042	BP	actin filament depolymerization	2/112	57/17943	0.0493452	0.223816	0.183477	Sptb/Sptbn2	2
GO:0051930	GO:0051930	BP	regulation of sensory perception of pain	2/112	57/17943	0.0493452	0.223816	0.183477	Oxt/Nos1	2
GO:1902750	GO:1902750	BP	negative regulation of cell cycle G2/M phase transition	2/112	57/17943	0.0493452	0.223816	0.183477	Syf2/H2afy	2
GO:0009165	GO:0009165	BP	nucleotide biosynthetic process	5/112	319/17943	0.0496943	0.224798	0.184282	Pfkfb3/Galt/Ppara/Nos1/Hk1	5
GO:0008277	GO:0008277	BP	regulation of G protein-coupled receptor signaling pathway	3/112	132/17943	0.0497304	0.224798	0.184282	Cry1/Nos1/Dnm1	3
GO:0033157	GO:0033157	BP	regulation of intracellular protein transport	4/112	222/17943	0.0504541	0.227684	0.186647	Chrm1/Agtr2/Nolc1/Vamp2	4
GO:0007093	GO:0007093	BP	mitotic cell cycle checkpoint	3/112	133/17943	0.0506547	0.227788	0.186733	Rps6/Syf2/Tipin	3
GO:0007528	GO:0007528	BP	neuromuscular junction development	2/112	58/17943	0.0509042	0.227788	0.186733	Unc13a/Unc13c	2
GO:0050702	GO:0050702	BP	interleukin-1 beta secretion	2/112	58/17943	0.0509042	0.227788	0.186733	Hk1/Foxp1	2
GO:0050704	GO:0050704	BP	regulation of interleukin-1 secretion	2/112	58/17943	0.0509042	0.227788	0.186733	Hk1/Foxp1	2
GO:0051931	GO:0051931	BP	regulation of sensory perception	2/112	58/17943	0.0509042	0.227788	0.186733	Oxt/Nos1	2
GO:0050905	GO:0050905	BP	neuromuscular process	3/112	134/17943	0.0515874	0.230458	0.188922	Kcnab2/Grin2b/Jph4	3
GO:0018209	GO:0018209	BP	peptidyl-serine modification	5/112	323/17943	0.0519066	0.23111	0.189456	Src/Sbk1/Nos1/Hk1/Dmd	5
GO:1901293	GO:1901293	BP	nucleoside phosphate biosynthetic process	5/112	323/17943	0.0519066	0.23111	0.189456	Pfkfb3/Galt/Ppara/Nos1/Hk1	5
GO:0044060	GO:0044060	BP	regulation of endocrine process	2/112	59/17943	0.0524808	0.231559	0.189824	Agtr2/Cry1	2
GO:0045744	GO:0045744	BP	negative regulation of G protein-coupled receptor signaling pathway	2/112	59/17943	0.0524808	0.231559	0.189824	Cry1/Dnm1	2
GO:0046605	GO:0046605	BP	regulation of centrosome cycle	2/112	59/17943	0.0524808	0.231559	0.189824	Npm1/Chmp5	2
GO:0016054	GO:0016054	BP	organic acid catabolic process	4/112	225/17943	0.0525215	0.231559	0.189824	Acadm/Hibadh/Cnr1/Nos1	4
GO:0046395	GO:0046395	BP	carboxylic acid catabolic process	4/112	225/17943	0.0525215	0.231559	0.189824	Acadm/Hibadh/Cnr1/Nos1	4
GO:0010811	GO:0010811	BP	positive regulation of cell-substrate adhesion	3/112	135/17943	0.0525284	0.231559	0.189824	Smad3/Hsd17b12/Dmd	3
GO:0019722	GO:0019722	BP	calcium-mediated signaling	4/112	227/17943	0.0539252	0.234882	0.192548	Grin2b/Selenok/Cacna1c/Dmd	4
GO:0071103	GO:0071103	BP	DNA conformation change	4/112	227/17943	0.0539252	0.234882	0.192548	Ncaph2/Npm1/Mterf1/H2afy	4
GO:0006900	GO:0006900	BP	vesicle budding from membrane	2/112	60/17943	0.0540747	0.234882	0.192548	Dnm1/Vapa	2
GO:0030837	GO:0030837	BP	negative regulation of actin filament polymerization	2/112	60/17943	0.0540747	0.234882	0.192548	Sptb/Sptbn2	2
GO:0044773	GO:0044773	BP	mitotic DNA damage checkpoint	2/112	60/17943	0.0540747	0.234882	0.192548	Syf2/Tipin	2
GO:0048008	GO:0048008	BP	platelet-derived growth factor receptor signaling pathway	2/112	60/17943	0.0540747	0.234882	0.192548	Src/Smpd3	2
GO:0051893	GO:0051893	BP	regulation of focal adhesion assembly	2/112	60/17943	0.0540747	0.234882	0.192548	Smad3/Src	2
GO:0090109	GO:0090109	BP	regulation of cell-substrate junction assembly	2/112	60/17943	0.0540747	0.234882	0.192548	Smad3/Src	2
GO:1902305	GO:1902305	BP	regulation of sodium ion transmembrane transport	2/112	60/17943	0.0540747	0.234882	0.192548	Nos1/Dmd	2
GO:0002181	GO:0002181	BP	cytoplasmic translation	3/112	137/17943	0.0544353	0.236063	0.193517	Eif3h/LOC108348062/Rpl41	3
GO:0097191	GO:0097191	BP	extrinsic apoptotic signaling pathway	4/112	228/17943	0.0546347	0.236544	0.19391	Smad3/Agtr2/Src/Sh3rf1	4
GO:0009416	GO:0009416	BP	response to light stimulus	5/112	328/17943	0.0547523	0.236668	0.194013	Npm1/Chrm1/Tipin/Cry1/Cacna1c	5
GO:0051146	GO:0051146	BP	striated muscle cell differentiation	5/112	329/17943	0.0553321	0.238699	0.195677	Agtr2/Acadm/Ppara/Dmd/Foxp1	5
GO:0044839	GO:0044839	BP	cell cycle G2/M phase transition	3/112	138/17943	0.0554011	0.238699	0.195677	Npm1/Syf2/H2afy	3
GO:0045840	GO:0045840	BP	positive regulation of mitotic nuclear division	2/112	61/17943	0.0556857	0.238812	0.19577	Smpd3/H2afy	2
GO:2001169	GO:2001169	BP	regulation of ATP biosynthetic process	2/112	61/17943	0.0556857	0.238812	0.19577	Pfkfb3/Ppara	2
GO:0071229	GO:0071229	BP	cellular response to acid chemical	5/112	330/17943	0.0559155	0.238812	0.19577	Src/Grin2b/Nsmf/Cyba/Foxp1	5
GO:0030258	GO:0030258	BP	lipid modification	4/112	230/17943	0.056069	0.238812	0.19577	Acadm/Plppr2/Cnr1/Ppara	4
GO:0030522	GO:0030522	BP	intracellular receptor signaling pathway	4/112	230/17943	0.056069	0.238812	0.19577	Src/Cry1/Ppara/Foxp1	4
GO:0048706	GO:0048706	BP	embryonic skeletal system development	3/112	139/17943	0.0563751	0.238812	0.19577	Smad3/Mmp16/Irx5	3
GO:0044282	GO:0044282	BP	small molecule catabolic process	5/112	332/17943	0.0570931	0.238812	0.19577	Acadm/Hibadh/Galt/Cnr1/Nos1	5
GO:0010659	GO:0010659	BP	cardiac muscle cell apoptotic process	2/112	62/17943	0.0573134	0.238812	0.19577	Npm1/Apaf1	2
GO:0032732	GO:0032732	BP	positive regulation of interleukin-1 production	2/112	62/17943	0.0573134	0.238812	0.19577	Smad3/Hk1	2
GO:0086003	GO:0086003	BP	cardiac muscle cell contraction	2/112	62/17943	0.0573134	0.238812	0.19577	Kcnj8/Cacna1c	2
GO:0050673	GO:0050673	BP	epithelial cell proliferation	6/112	441/17943	0.0581313	0.238812	0.19577	Npm1/Smad3/Pold4/Tinf2/Cyba/Foxp1	6
GO:0001822	GO:0001822	BP	kidney development	5/112	334/17943	0.0582849	0.238812	0.19577	Smad3/Agtr2/Apaf1/Ctsh/Kcnj8	5
GO:0021695	GO:0021695	BP	cerebellar cortex development	2/112	63/17943	0.0589577	0.238812	0.19577	Agtr2/Sptbn2	2
GO:0051148	GO:0051148	BP	negative regulation of muscle cell differentiation	2/112	63/17943	0.0589577	0.238812	0.19577	Ppara/Foxp1	2
GO:1905207	GO:1905207	BP	regulation of cardiocyte differentiation	2/112	63/17943	0.0589577	0.238812	0.19577	Ppara/Foxp1	2
GO:0006261	GO:0006261	BP	DNA-dependent DNA replication	3/112	142/17943	0.0593461	0.238812	0.19577	Npm1/Pold4/Tipin	3
GO:0006732	GO:0006732	BP	coenzyme metabolic process	5/112	336/17943	0.059491	0.238812	0.19577	Kcnab2/Pfkfb3/Galt/Ppara/Hk1	5
GO:0009152	GO:0009152	BP	purine ribonucleotide biosynthetic process	4/112	235/17943	0.059743	0.238812	0.19577	Pfkfb3/Galt/Ppara/Hk1	4
GO:0007589	GO:0007589	BP	body fluid secretion	3/112	143/17943	0.0603526	0.238812	0.19577	Chrm1/Oxt/Cyba	3
GO:0033673	GO:0033673	BP	negative regulation of kinase activity	4/112	236/17943	0.060493	0.238812	0.19577	Npm1/Pcp4/Prkar2a/H2afy	4
GO:0042306	GO:0042306	BP	regulation of protein import into nucleus	2/112	64/17943	0.0606181	0.238812	0.19577	Agtr2/Nolc1	2
GO:0045843	GO:0045843	BP	negative regulation of striated muscle tissue development	2/112	64/17943	0.0606181	0.238812	0.19577	Ppara/Foxp1	2
GO:0060986	GO:0060986	BP	endocrine hormone secretion	2/112	64/17943	0.0606181	0.238812	0.19577	Agtr2/Cry1	2
GO:0070059	GO:0070059	BP	intrinsic apoptotic signaling pathway in response to endoplasmic reticulum stress	2/112	64/17943	0.0606181	0.238812	0.19577	Apaf1/Selenok	2
GO:0000478	GO:0000478	BP	endonucleolytic cleavage involved in rRNA processing	1/112	10/17943	0.0607102	0.238812	0.19577	Npm1	1
GO:0000479	GO:0000479	BP	endonucleolytic cleavage of tricistronic rRNA transcript (SSU-rRNA, 5.8S rRNA, LSU-rRNA)	1/112	10/17943	0.0607102	0.238812	0.19577	Npm1	1
GO:0002679	GO:0002679	BP	respiratory burst involved in defense response	1/112	10/17943	0.0607102	0.238812	0.19577	Selenok	1
GO:0006012	GO:0006012	BP	galactose metabolic process	1/112	10/17943	0.0607102	0.238812	0.19577	Galt	1
GO:0007603	GO:0007603	BP	phototransduction, visible light	1/112	10/17943	0.0607102	0.238812	0.19577	Chrm1	1
GO:0010612	GO:0010612	BP	regulation of cardiac muscle adaptation	1/112	10/17943	0.0607102	0.238812	0.19577	Smad3	1
GO:0010807	GO:0010807	BP	regulation of synaptic vesicle priming	1/112	10/17943	0.0607102	0.238812	0.19577	Unc13a	1
GO:0014029	GO:0014029	BP	neural crest formation	1/112	10/17943	0.0607102	0.238812	0.19577	Nolc1	1
GO:0018298	GO:0018298	BP	protein-chromophore linkage	1/112	10/17943	0.0607102	0.238812	0.19577	Cry1	1
GO:0031282	GO:0031282	BP	regulation of guanylate cyclase activity	1/112	10/17943	0.0607102	0.238812	0.19577	Nos1	1
GO:0031622	GO:0031622	BP	positive regulation of fever generation	1/112	10/17943	0.0607102	0.238812	0.19577	Cnr1	1
GO:0032070	GO:0032070	BP	regulation of deoxyribonuclease activity	1/112	10/17943	0.0607102	0.238812	0.19577	Npm1	1
GO:0035811	GO:0035811	BP	negative regulation of urine volume	1/112	10/17943	0.0607102	0.238812	0.19577	Oxt	1
GO:0045759	GO:0045759	BP	negative regulation of action potential	1/112	10/17943	0.0607102	0.238812	0.19577	Cnr1	1
GO:0045876	GO:0045876	BP	positive regulation of sister chromatid cohesion	1/112	10/17943	0.0607102	0.238812	0.19577	H2afy	1
GO:0051001	GO:0051001	BP	negative regulation of nitric-oxide synthase activity	1/112	10/17943	0.0607102	0.238812	0.19577	Cnr1	1
GO:0060040	GO:0060040	BP	retinal bipolar neuron differentiation	1/112	10/17943	0.0607102	0.238812	0.19577	Irx5	1
GO:0060282	GO:0060282	BP	positive regulation of oocyte development	1/112	10/17943	0.0607102	0.238812	0.19577	Prkar2a	1
GO:0060406	GO:0060406	BP	positive regulation of penile erection	1/112	10/17943	0.0607102	0.238812	0.19577	Oxt	1
GO:0061085	GO:0061085	BP	regulation of histone H3-K27 methylation	1/112	10/17943	0.0607102	0.238812	0.19577	H2afy	1
GO:0070257	GO:0070257	BP	positive regulation of mucus secretion	1/112	10/17943	0.0607102	0.238812	0.19577	Cyba	1
GO:0071225	GO:0071225	BP	cellular response to muramyl dipeptide	1/112	10/17943	0.0607102	0.238812	0.19577	Chmp5	1
GO:0098700	GO:0098700	BP	neurotransmitter loading into synaptic vesicle	1/112	10/17943	0.0607102	0.238812	0.19577	Slc17a7	1
GO:0099004	GO:0099004	BP	calmodulin dependent kinase signaling pathway	1/112	10/17943	0.0607102	0.238812	0.19577	Pcp4	1
GO:0099541	GO:0099541	BP	trans-synaptic signaling by lipid	1/112	10/17943	0.0607102	0.238812	0.19577	Cnr1	1
GO:0099542	GO:0099542	BP	trans-synaptic signaling by endocannabinoid	1/112	10/17943	0.0607102	0.238812	0.19577	Cnr1	1
GO:0140052	GO:0140052	BP	cellular response to oxidised low-density lipoprotein particle stimulus	1/112	10/17943	0.0607102	0.238812	0.19577	Smpd3	1
GO:1900102	GO:1900102	BP	negative regulation of endoplasmic reticulum unfolded protein response	1/112	10/17943	0.0607102	0.238812	0.19577	Dnajb9	1
GO:1901033	GO:1901033	BP	positive regulation of response to reactive oxygen species	1/112	10/17943	0.0607102	0.238812	0.19577	Foxp1	1
GO:1904044	GO:1904044	BP	response to aldosterone	1/112	10/17943	0.0607102	0.238812	0.19577	Cyba	1
GO:1905881	GO:1905881	BP	positive regulation of oogenesis	1/112	10/17943	0.0607102	0.238812	0.19577	Prkar2a	1
GO:2000303	GO:2000303	BP	regulation of ceramide biosynthetic process	1/112	10/17943	0.0607102	0.238812	0.19577	Smpd3	1
GO:2000392	GO:2000392	BP	regulation of lamellipodium morphogenesis	1/112	10/17943	0.0607102	0.238812	0.19577	Src	1
GO:2001182	GO:2001182	BP	regulation of interleukin-12 secretion	1/112	10/17943	0.0607102	0.238812	0.19577	Foxp1	1
GO:2001269	GO:2001269	BP	positive regulation of cysteine-type endopeptidase activity involved in apoptotic signaling pathway	1/112	10/17943	0.0607102	0.238812	0.19577	Smad3	1
GO:0045930	GO:0045930	BP	negative regulation of mitotic cell cycle	4/112	237/17943	0.0612479	0.240227	0.19693	Smad3/Rps6/Syf2/Tipin	4
GO:0051052	GO:0051052	BP	regulation of DNA metabolic process	6/112	447/17943	0.0612501	0.240227	0.19693	Npm1/Src/Tnfaip1/Tipin/Apaf1/Tinf2	6
GO:0010634	GO:0010634	BP	positive regulation of epithelial cell migration	3/112	144/17943	0.0613671	0.240332	0.197016	Src/Ctsh/Foxp1	3
GO:0006260	GO:0006260	BP	DNA replication	4/112	238/17943	0.0620079	0.24125	0.197768	Npm1/Tnfaip1/Pold4/Tipin	4
GO:0071248	GO:0071248	BP	cellular response to metal ion	4/112	238/17943	0.0620079	0.24125	0.197768	Nptx1/Syt1/Smpd3/Grin2b	4
GO:0010658	GO:0010658	BP	striated muscle cell apoptotic process	2/112	65/17943	0.0622946	0.24125	0.197768	Npm1/Apaf1	2
GO:1904356	GO:1904356	BP	regulation of telomere maintenance via telomere lengthening	2/112	65/17943	0.0622946	0.24125	0.197768	Src/Tinf2	2
GO:0042476	GO:0042476	BP	odontogenesis	3/112	145/17943	0.0623896	0.24125	0.197768	Src/Smpd3/Ppara	3
GO:0060348	GO:0060348	BP	bone development	4/112	239/17943	0.0627729	0.24125	0.197768	Src/Smpd3/Mmp16/Foxp1	4
GO:0014706	GO:0014706	BP	striated muscle tissue development	6/112	451/17943	0.063384	0.24125	0.197768	Smad3/Agtr2/Acadm/Ppara/Dmd/Foxp1	6
GO:0050728	GO:0050728	BP	negative regulation of inflammatory response	3/112	146/17943	0.06342	0.24125	0.197768	Smad3/Psma1/Ppara	3
GO:0051168	GO:0051168	BP	nuclear export	3/112	146/17943	0.06342	0.24125	0.197768	Npm1/Sarnp/Lsg1	3
GO:0090276	GO:0090276	BP	regulation of peptide hormone secretion	4/112	240/17943	0.0635429	0.24125	0.197768	Doc2b/Cnr1/Sstr5/Nos1	4
GO:0006446	GO:0006446	BP	regulation of translational initiation	2/112	66/17943	0.0639868	0.24125	0.197768	Npm1/Eif4ebp2	2
GO:0007004	GO:0007004	BP	telomere maintenance via telomerase	2/112	66/17943	0.0639868	0.24125	0.197768	Src/Tinf2	2
GO:0048635	GO:0048635	BP	negative regulation of muscle organ development	2/112	66/17943	0.0639868	0.24125	0.197768	Ppara/Foxp1	2
GO:0050701	GO:0050701	BP	interleukin-1 secretion	2/112	66/17943	0.0639868	0.24125	0.197768	Hk1/Foxp1	2
GO:0051298	GO:0051298	BP	centrosome duplication	2/112	66/17943	0.0639868	0.24125	0.197768	Npm1/Chmp5	2
GO:1903391	GO:1903391	BP	regulation of adherens junction organization	2/112	66/17943	0.0639868	0.24125	0.197768	Smad3/Src	2
GO:1903793	GO:1903793	BP	positive regulation of anion transport	2/112	66/17943	0.0639868	0.24125	0.197768	Oxt/Grin2b	2
GO:0009743	GO:0009743	BP	response to carbohydrate	5/112	345/17943	0.0650949	0.24125	0.197768	Nptx1/Oxt/Grin2b/Vamp2/Cyba	5
GO:0002831	GO:0002831	BP	regulation of response to biotic stimulus	3/112	148/17943	0.0655046	0.24125	0.197768	Selenok/Cyba/Foxp1	3
GO:0006278	GO:0006278	BP	RNA-dependent DNA biosynthetic process	2/112	67/17943	0.0656944	0.24125	0.197768	Src/Tinf2	2
GO:0019915	GO:0019915	BP	lipid storage	2/112	67/17943	0.0656944	0.24125	0.197768	Cry1/Ppara	2
GO:0032922	GO:0032922	BP	circadian regulation of gene expression	2/112	67/17943	0.0656944	0.24125	0.197768	Cry1/Ppara	2
GO:1901862	GO:1901862	BP	negative regulation of muscle tissue development	2/112	67/17943	0.0656944	0.24125	0.197768	Ppara/Foxp1	2
GO:0002793	GO:0002793	BP	positive regulation of peptide secretion	5/112	347/17943	0.0663793	0.24125	0.197768	Agtr2/Src/Doc2b/Selenok/Hk1	5
GO:0031589	GO:0031589	BP	cell-substrate adhesion	5/112	347/17943	0.0663793	0.24125	0.197768	Smad3/Src/Onecut1/Hsd17b12/Dmd	5
GO:0000070	GO:0000070	BP	mitotic sister chromatid segregation	3/112	149/17943	0.0665587	0.24125	0.197768	Ncaph2/H2afy/Chmp5	3
GO:2001251	GO:2001251	BP	negative regulation of chromosome organization	3/112	149/17943	0.0665587	0.24125	0.197768	Src/Tinf2/H2afy	3
GO:0002118	GO:0002118	BP	aggressive behavior	1/112	11/17943	0.0665766	0.24125	0.197768	Oxt	1
GO:0006000	GO:0006000	BP	fructose metabolic process	1/112	11/17943	0.0665766	0.24125	0.197768	Pfkfb3	1
GO:0009744	GO:0009744	BP	response to sucrose	1/112	11/17943	0.0665766	0.24125	0.197768	Oxt	1
GO:0010692	GO:0010692	BP	regulation of alkaline phosphatase activity	1/112	11/17943	0.0665766	0.24125	0.197768	Smad3	1
GO:0010826	GO:0010826	BP	negative regulation of centrosome duplication	1/112	11/17943	0.0665766	0.24125	0.197768	Npm1	1
GO:0014824	GO:0014824	BP	artery smooth muscle contraction	1/112	11/17943	0.0665766	0.24125	0.197768	Smpd3	1
GO:0031620	GO:0031620	BP	regulation of fever generation	1/112	11/17943	0.0665766	0.24125	0.197768	Cnr1	1
GO:0032463	GO:0032463	BP	negative regulation of protein homooligomerization	1/112	11/17943	0.0665766	0.24125	0.197768	Src	1
GO:0033539	GO:0033539	BP	fatty acid beta-oxidation using acyl-CoA dehydrogenase	1/112	11/17943	0.0665766	0.24125	0.197768	Acadm	1
GO:0033603	GO:0033603	BP	positive regulation of dopamine secretion	1/112	11/17943	0.0665766	0.24125	0.197768	Pcp4	1
GO:0033689	GO:0033689	BP	negative regulation of osteoblast proliferation	1/112	11/17943	0.0665766	0.24125	0.197768	Smad3	1
GO:0034135	GO:0034135	BP	regulation of toll-like receptor 2 signaling pathway	1/112	11/17943	0.0665766	0.24125	0.197768	Cyba	1
GO:0034285	GO:0034285	BP	response to disaccharide	1/112	11/17943	0.0665766	0.24125	0.197768	Oxt	1
GO:0035542	GO:0035542	BP	regulation of SNARE complex assembly	1/112	11/17943	0.0665766	0.24125	0.197768	Trim9	1
GO:0045762	GO:0045762	BP	positive regulation of adenylate cyclase activity	1/112	11/17943	0.0665766	0.24125	0.197768	Cacna1c	1
GO:0048617	GO:0048617	BP	embryonic foregut morphogenesis	1/112	11/17943	0.0665766	0.24125	0.197768	Smad3	1
GO:0060179	GO:0060179	BP	male mating behavior	1/112	11/17943	0.0665766	0.24125	0.197768	Oxt	1
GO:0060180	GO:0060180	BP	female mating behavior	1/112	11/17943	0.0665766	0.24125	0.197768	Oxt	1
GO:0060600	GO:0060600	BP	dichotomous subdivision of an epithelial terminal unit	1/112	11/17943	0.0665766	0.24125	0.197768	Ctsh	1
GO:0072584	GO:0072584	BP	caveolin-mediated endocytosis	1/112	11/17943	0.0665766	0.24125	0.197768	Src	1
GO:0086016	GO:0086016	BP	AV node cell action potential	1/112	11/17943	0.0665766	0.24125	0.197768	Cacna1c	1
GO:0086027	GO:0086027	BP	AV node cell to bundle of His cell signaling	1/112	11/17943	0.0665766	0.24125	0.197768	Cacna1c	1
GO:0090153	GO:0090153	BP	regulation of sphingolipid biosynthetic process	1/112	11/17943	0.0665766	0.24125	0.197768	Smpd3	1
GO:0098915	GO:0098915	BP	membrane repolarization during ventricular cardiac muscle cell action potential	1/112	11/17943	0.0665766	0.24125	0.197768	Kcnj8	1
GO:0099562	GO:0099562	BP	maintenance of postsynaptic density structure	1/112	11/17943	0.0665766	0.24125	0.197768	Dlgap1	1
GO:1902075	GO:1902075	BP	cellular response to salt	1/112	11/17943	0.0665766	0.24125	0.197768	Pcp4	1
GO:1902510	GO:1902510	BP	regulation of apoptotic DNA fragmentation	1/112	11/17943	0.0665766	0.24125	0.197768	Apaf1	1
GO:1905038	GO:1905038	BP	regulation of membrane lipid metabolic process	1/112	11/17943	0.0665766	0.24125	0.197768	Smpd3	1
GO:0006813	GO:0006813	BP	potassium ion transport	4/112	244/17943	0.0666726	0.24127	0.197785	Kcnab2/Vamp2/Kcnj8/Nos1	4
GO:0015800	GO:0015800	BP	acidic amino acid transport	2/112	68/17943	0.0674173	0.242975	0.199183	Grin2b/Slc17a7	2
GO:0044774	GO:0044774	BP	mitotic DNA integrity checkpoint	2/112	68/17943	0.0674173	0.242975	0.199183	Syf2/Tipin	2
GO:0099601	GO:0099601	BP	regulation of neurotransmitter receptor activity	2/112	68/17943	0.0674173	0.242975	0.199183	Nptx1/Src	2
GO:0045862	GO:0045862	BP	positive regulation of proteolysis	5/112	349/17943	0.0676779	0.243586	0.199683	Smad3/Src/Grin2b/Apaf1/Ctsh	5
GO:0044306	GO:0044306	CC	neuron projection terminus	14/116	245/18437	4.49131e-10	1.40578e-07	9.73905e-08	Chrm1/Unc13a/Syt1/Kcnab2/Oxt/Grin2b/Cacna1b/Bsn/Sept5/Vamp2/Cacna1c/Unc13c/Nos1/Dmd	14
GO:0070382	GO:0070382	CC	exocytic vesicle	14/116	280/18437	2.5462e-09	3.35322e-07	2.32307e-07	Unc13a/Trim9/Syt1/Grin2b/Slc17a7/Bsn/Sept5/Vamp2/Unc13c/Erc1/Sptbn2/Dmd/Dnm1/Vapa	14
GO:0008021	GO:0008021	CC	synaptic vesicle	13/116	237/18437	3.21395e-09	3.35322e-07	2.32307e-07	Unc13a/Trim9/Syt1/Grin2b/Slc17a7/Bsn/Sept5/Vamp2/Unc13c/Erc1/Sptbn2/Dmd/Dnm1	13
GO:0098984	GO:0098984	CC	neuron to neuron synapse	16/116	445/18437	1.93251e-08	1.43613e-06	9.94928e-07	Chrm1/Src/Lzts3/Dlgap1/Syt1/Kcnab2/Grin2b/Iqsec3/Bsn/Nsmf/Arhgef9/Cacna1c/Erc1/Nos1/Dmd/Dnm1	16
GO:0030133	GO:0030133	CC	transport vesicle	15/116	390/18437	2.29413e-08	1.43613e-06	9.94928e-07	Nptx1/Unc13a/Trim9/Syt1/Grin2b/Slc17a7/Bsn/Sept5/Vamp2/Unc13c/Erc1/Sptbn2/Dmd/Dnm1/Vapa	15
GO:0014069	GO:0014069	CC	postsynaptic density	15/116	417/18437	5.53807e-08	2.80547e-06	1.94359e-06	Chrm1/Src/Lzts3/Dlgap1/Kcnab2/Grin2b/Iqsec3/Bsn/Nsmf/Arhgef9/Cacna1c/Erc1/Nos1/Dmd/Dnm1	15
GO:0032279	GO:0032279	CC	asymmetric synapse	15/116	421/18437	6.27421e-08	2.80547e-06	1.94359e-06	Chrm1/Src/Lzts3/Dlgap1/Kcnab2/Grin2b/Iqsec3/Bsn/Nsmf/Arhgef9/Cacna1c/Erc1/Nos1/Dmd/Dnm1	15
GO:0043679	GO:0043679	CC	axon terminus	11/116	222/18437	1.56395e-07	5.48414e-06	3.79934e-06	Chrm1/Unc13a/Syt1/Kcnab2/Oxt/Grin2b/Cacna1b/Sept5/Vamp2/Unc13c/Nos1	11
GO:0099572	GO:0099572	CC	postsynaptic specialization	15/116	452/18437	1.57691e-07	5.48414e-06	3.79934e-06	Chrm1/Src/Lzts3/Dlgap1/Kcnab2/Grin2b/Iqsec3/Bsn/Nsmf/Arhgef9/Cacna1c/Erc1/Nos1/Dmd/Dnm1	15
GO:0097060	GO:0097060	CC	synaptic membrane	15/116	493/18437	4.77619e-07	1.41348e-05	9.79241e-06	Chrm1/Lzts3/Unc13a/Dlgap1/Syt1/Grin2b/Iqsec3/Cnr1/Bsn/Nsmf/Arhgef9/Cacna1c/Unc13c/Dmd/Dnm1	15
GO:0060076	GO:0060076	CC	excitatory synapse	7/116	76/18437	4.96751e-07	1.41348e-05	9.79241e-06	Unc13a/Syt1/Grin2b/Slc17a7/Bsn/Unc13c/Sptbn2	7
GO:0098831	GO:0098831	CC	presynaptic active zone cytoplasmic component	4/116	21/18437	8.19699e-06	0.000213805	0.000148121	Unc13a/Bsn/Unc13c/Erc1	4
GO:0150034	GO:0150034	CC	distal axon	12/116	423/18437	1.4555e-05	0.000305143	0.000211399	Chrm1/Unc13a/Syt1/Kcnab2/Oxt/Grin2b/Cacna1b/Cnr1/Sept5/Vamp2/Unc13c/Nos1	12
GO:0043195	GO:0043195	CC	terminal bouton	7/116	126/18437	1.48149e-05	0.000305143	0.000211399	Unc13a/Syt1/Oxt/Grin2b/Sept5/Vamp2/Unc13c	7
GO:0030672	GO:0030672	CC	synaptic vesicle membrane	7/116	127/18437	1.55984e-05	0.000305143	0.000211399	Unc13a/Syt1/Slc17a7/Bsn/Vamp2/Unc13c/Dmd	7
GO:0099501	GO:0099501	CC	exocytic vesicle membrane	7/116	127/18437	1.55984e-05	0.000305143	0.000211399	Unc13a/Syt1/Slc17a7/Bsn/Vamp2/Unc13c/Dmd	7
GO:0044305	GO:0044305	CC	calyx of Held	4/116	30/18437	3.59285e-05	0.000661507	0.000458283	Unc13a/Sept5/Unc13c/Nos1	4
GO:0042734	GO:0042734	CC	presynaptic membrane	8/116	212/18437	5.87552e-05	0.000967914	0.000670558	Chrm1/Unc13a/Syt1/Grin2b/Cnr1/Cacna1c/Unc13c/Dnm1	8
GO:0044448	GO:0044448	CC	cell cortex part	8/116	212/18437	5.87552e-05	0.000967914	0.000670558	Sptb/Unc13a/Bsn/Sept5/Nsmf/Unc13c/Erc1/Sptbn2	8
GO:0045211	GO:0045211	CC	postsynaptic membrane	10/116	354/18437	8.06445e-05	0.00126209	0.000874356	Chrm1/Lzts3/Dlgap1/Grin2b/Iqsec3/Nsmf/Arhgef9/Cacna1c/Dmd/Dnm1	10
GO:0044853	GO:0044853	CC	plasma membrane raft	6/116	127/18437	0.000151659	0.00226044	0.001566	Src/Cacna1c/Nos1/Nos1ap/Prkar2a/Hk1	6
GO:0030658	GO:0030658	CC	transport vesicle membrane	7/116	186/18437	0.000175541	0.00249748	0.00173022	Unc13a/Syt1/Slc17a7/Bsn/Vamp2/Unc13c/Dmd	7
GO:0015935	GO:0015935	CC	small ribosomal subunit	6/116	132/18437	0.00018726	0.00254836	0.00176547	Npm1/Rps6/Rps27a-ps1/Rps27a/Rps15a/Mrps15	6
GO:0031201	GO:0031201	CC	SNARE complex	4/116	46/18437	0.000197977	0.00258195	0.00178874	Bet1/Syt1/Doc2b/Vamp2	4
GO:0005840	GO:0005840	CC	ribosome	10/116	399/18437	0.000213907	0.00267811	0.00185536	Npm1/Rps6/Rps27a-ps1/Rps27a/Rps15a/Mrps15/Eif3h/Rpl41/Mrpl46/Dmd	10
GO:0048786	GO:0048786	CC	presynaptic active zone	5/116	91/18437	0.000273244	0.0032562	0.00225585	Unc13a/Slc17a7/Bsn/Unc13c/Erc1	5
GO:0005938	GO:0005938	CC	cell cortex	9/116	337/18437	0.000280887	0.0032562	0.00225585	Sptb/Unc13a/Bsn/Sept5/Nsmf/Arhgef9/Unc13c/Erc1/Sptbn2	9
GO:0005901	GO:0005901	CC	caveola	5/116	97/18437	0.000367507	0.0041082	0.0028461	Src/Cacna1c/Nos1/Nos1ap/Hk1	5
GO:0099738	GO:0099738	CC	cell cortex region	4/116	55/18437	0.000396149	0.00427567	0.00296213	Unc13a/Bsn/Unc13c/Erc1	4
GO:0034703	GO:0034703	CC	cation channel complex	7/116	221/18437	0.000499214	0.00520846	0.00360835	Kcnab2/Grin2b/Cacna1b/Vamp2/Kcnj8/Cacna1c/Nos1ap	7
GO:0098982	GO:0098982	CC	GABA-ergic synapse	5/116	106/18437	0.000552574	0.00557921	0.0038652	Iqsec3/Cnr1/Bsn/Arhgef9/Erc1	5
GO:0042383	GO:0042383	CC	sarcolemma	6/116	171/18437	0.000745633	0.00729322	0.00505264	Kcnj8/Cacna1c/Nos1/Nos1ap/Prkar2a/Dmd	6
GO:0030315	GO:0030315	CC	T-tubule	4/116	69/18437	0.000938546	0.00890197	0.00616716	Cacna1c/Nos1/Nos1ap/Prkar2a	4
GO:0098688	GO:0098688	CC	parallel fiber to Purkinje cell synapse	3/116	33/18437	0.0011538	0.0106218	0.00735861	Grin2b/Unc13c/Sptbn2	3
GO:0044391	GO:0044391	CC	ribosomal subunit	8/116	336/18437	0.00129241	0.0115579	0.00800713	Npm1/Rps6/Rps27a-ps1/Rps27a/Rps15a/Mrps15/Rpl41/Mrpl46	8
GO:0030018	GO:0030018	CC	Z disc	5/116	134/18437	0.00158398	0.0137718	0.00954092	Grin2b/Cacna1c/Nos1/Nos1ap/Dmd	5
GO:0005891	GO:0005891	CC	voltage-gated calcium channel complex	3/116	39/18437	0.00188041	0.0154887	0.0107303	Cacna1b/Cacna1c/Nos1ap	3
GO:0099091	GO:0099091	CC	postsynaptic specialization, intracellular component	3/116	39/18437	0.00188041	0.0154887	0.0107303	Src/Dlgap1/Nos1	3
GO:0031674	GO:0031674	CC	I band	5/116	146/18437	0.00230612	0.0180932	0.0125347	Grin2b/Cacna1c/Nos1/Nos1ap/Dmd	5
GO:0000137	GO:0000137	CC	Golgi cis cisterna	2/116	12/18437	0.00248565	0.0180932	0.0125347	Bet1/Smpd3	2
GO:0001520	GO:0001520	CC	outer dense fiber	2/116	12/18437	0.00248565	0.0180932	0.0125347	Ctsh/Pmfbp1	2
GO:0005883	GO:0005883	CC	neurofilament	2/116	12/18437	0.00248565	0.0180932	0.0125347	Pcp4/Dmd	2
GO:1990454	GO:1990454	CC	L-type voltage-gated calcium channel complex	2/116	12/18437	0.00248565	0.0180932	0.0125347	Cacna1c/Nos1ap	2
GO:0034702	GO:0034702	CC	ion channel complex	7/116	294/18437	0.00259323	0.0184473	0.01278	Kcnab2/Grin2b/Cacna1b/Vamp2/Kcnj8/Cacna1c/Nos1ap	7
GO:0098690	GO:0098690	CC	glycinergic synapse	2/116	13/18437	0.00292554	0.0199751	0.0138385	Iqsec3/Arhgef9	2
GO:0034705	GO:0034705	CC	potassium channel complex	4/116	94/18437	0.00293563	0.0199751	0.0138385	Kcnab2/Vamp2/Kcnj8/Nos1ap	4
GO:0030285	GO:0030285	CC	integral component of synaptic vesicle membrane	3/116	47/18437	0.00321687	0.021423	0.0148416	Syt1/Slc17a7/Vamp2	3
GO:0030016	GO:0030016	CC	myofibril	6/116	230/18437	0.00335211	0.0218586	0.0151433	Grin2b/Kcnj8/Cacna1c/Nos1/Nos1ap/Dmd	6
GO:0045121	GO:0045121	CC	membrane raft	8/116	396/18437	0.00357441	0.0220301	0.0152622	Src/Cnr1/Cacna1c/Nos1/Nos1ap/Prkar2a/Hk1/Dmd	8
GO:0098686	GO:0098686	CC	hippocampal mossy fiber to CA3 synapse	3/116	49/18437	0.00362199	0.0220301	0.0152622	Syt1/Grin2b/Bsn	3
GO:0098857	GO:0098857	CC	membrane microdomain	8/116	397/18437	0.00362916	0.0220301	0.0152622	Src/Cnr1/Cacna1c/Nos1/Nos1ap/Prkar2a/Hk1/Dmd	8
GO:1902495	GO:1902495	CC	transmembrane transporter complex	7/116	314/18437	0.00372836	0.0220301	0.0152622	Kcnab2/Grin2b/Cacna1b/Vamp2/Kcnj8/Cacna1c/Nos1ap	7
GO:0044445	GO:0044445	CC	cytosolic part	8/116	400/18437	0.0037973	0.0220301	0.0152622	Rps6/Rps27a-ps1/Rps27a/Rps15a/Trim9/Apaf1/Erc1/Rpl41	8
GO:0022627	GO:0022627	CC	cytosolic small ribosomal subunit	4/116	101/18437	0.00380073	0.0220301	0.0152622	Rps6/Rps27a-ps1/Rps27a/Rps15a	4
GO:0043292	GO:0043292	CC	contractile fiber	6/116	240/18437	0.00412598	0.0234806	0.016267	Grin2b/Kcnj8/Cacna1c/Nos1/Nos1ap/Dmd	6
GO:1990351	GO:1990351	CC	transporter complex	7/116	321/18437	0.00420398	0.0234973	0.0162786	Kcnab2/Grin2b/Cacna1b/Vamp2/Kcnj8/Cacna1c/Nos1ap	7
GO:0098589	GO:0098589	CC	membrane region	8/116	411/18437	0.00446604	0.0245241	0.0169899	Src/Cnr1/Cacna1c/Nos1/Nos1ap/Prkar2a/Hk1/Dmd	8
GO:0033290	GO:0033290	CC	eukaryotic 48S preinitiation complex	2/116	17/18437	0.00501784	0.027079	0.01876	Eif3h/LOC108348062	2
GO:0012506	GO:0012506	CC	vesicle membrane	8/116	423/18437	0.00529551	0.0280931	0.0194625	Unc13a/Syt1/Slc17a7/Bsn/Vamp2/Unc13c/Nos1/Dmd	8
GO:0005852	GO:0005852	CC	eukaryotic translation initiation factor 3 complex	2/116	19/18437	0.00625766	0.0326441	0.0226154	Eif3h/LOC108348062	2
GO:0034704	GO:0034704	CC	calcium channel complex	3/116	60/18437	0.00639938	0.0328362	0.0227484	Cacna1b/Cacna1c/Nos1ap	3
GO:0043083	GO:0043083	CC	synaptic cleft	2/116	20/18437	0.00692453	0.0349577	0.0242182	Nptx1/Grin2b	2
GO:0016607	GO:0016607	CC	nuclear speck	7/116	355/18437	0.00719736	0.0357583	0.0247729	Npm1/Sarnp/Acadm/Surf2/Syf2/Itpkc/Rnps1	7
GO:0099056	GO:0099056	CC	integral component of presynaptic membrane	4/116	122/18437	0.00739502	0.0361663	0.0250555	Chrm1/Grin2b/Cnr1/Cacna1c	4
GO:0016282	GO:0016282	CC	eukaryotic 43S preinitiation complex	2/116	21/18437	0.00762215	0.0367036	0.0254277	Eif3h/LOC108348062	2
GO:0031965	GO:0031965	CC	nuclear membrane	6/116	274/18437	0.00776087	0.0368054	0.0254982	Smad3/Kpna4/Nsmf/Nos1/Nos1ap/Vapa	6
GO:0005839	GO:0005839	CC	proteasome core complex	2/116	22/18437	0.00835011	0.0384351	0.0266273	Psma1/Psmb8	2
GO:0070993	GO:0070993	CC	translation preinitiation complex	2/116	22/18437	0.00835011	0.0384351	0.0266273	Eif3h/LOC108348062	2
GO:0043198	GO:0043198	CC	dendritic shaft	3/116	67/18437	0.00867885	0.0384783	0.0266572	Jph4/Cacna1b/Cacna1c	3
GO:0098563	GO:0098563	CC	intrinsic component of synaptic vesicle membrane	3/116	67/18437	0.00867885	0.0384783	0.0266572	Syt1/Slc17a7/Vamp2	3
GO:0030863	GO:0030863	CC	cortical cytoskeleton	4/116	128/18437	0.00872831	0.0384783	0.0266572	Sptb/Bsn/Nsmf/Sptbn2	4
GO:0030017	GO:0030017	CC	sarcomere	5/116	201/18437	0.00886147	0.0385228	0.0266881	Grin2b/Cacna1c/Nos1/Nos1ap/Dmd	5
GO:0097470	GO:0097470	CC	ribbon synapse	2/116	23/18437	0.00910802	0.0390522	0.0270548	Bsn/Dnm1	2
GO:0060077	GO:0060077	CC	inhibitory synapse	2/116	24/18437	0.00989548	0.0418552	0.0289967	Iqsec3/Bsn	2
GO:0098889	GO:0098889	CC	intrinsic component of presynaptic membrane	4/116	135/18437	0.0104717	0.0437018	0.030276	Chrm1/Grin2b/Cnr1/Cacna1c	4
GO:0043197	GO:0043197	CC	dendritic spine	5/116	214/18437	0.0114076	0.046371	0.0321252	Lzts3/Grin2b/Nsmf/Nos1/Dnm1	5
GO:0044449	GO:0044449	CC	contractile fiber part	5/116	214/18437	0.0114076	0.046371	0.0321252	Grin2b/Cacna1c/Nos1/Nos1ap/Dmd	5
GO:0097440	GO:0097440	CC	apical dendrite	2/116	26/18437	0.0115574	0.046378	0.03213	Grin2b/Nsmf	2
GO:0044309	GO:0044309	CC	neuron spine	5/116	217/18437	0.0120591	0.0477784	0.0331002	Lzts3/Grin2b/Nsmf/Nos1/Dnm1	5
GO:0031301	GO:0031301	CC	integral component of organelle membrane	5/116	218/18437	0.0122818	0.0480524	0.03329	Bet1/Syt1/Slc17a7/Cnr1/Vamp2	5
GO:0030659	GO:0030659	CC	cytoplasmic vesicle membrane	7/116	397/18437	0.0127966	0.0494487	0.0342574	Unc13a/Syt1/Slc17a7/Bsn/Vamp2/Unc13c/Dmd	7
GO:0016528	GO:0016528	CC	sarcoplasm	3/116	78/18437	0.0131141	0.0500574	0.0346791	Jph4/Nos1/Nos1ap	3
GO:0005741	GO:0005741	CC	mitochondrial outer membrane	4/116	151/18437	0.015263	0.0575581	0.0398755	Cnr1/Nos1/Hk1/Dmd	4
GO:0008076	GO:0008076	CC	voltage-gated potassium channel complex	3/116	83/18437	0.0154855	0.0577019	0.0399751	Kcnab2/Vamp2/Nos1ap	3
GO:0033017	GO:0033017	CC	sarcoplasmic reticulum membrane	2/116	31/18437	0.0162022	0.0596622	0.0413332	Nos1/Nos1ap	2
GO:0005844	GO:0005844	CC	polysome	3/116	87/18437	0.0175454	0.063857	0.0442392	Rps6/Eif3h/Rpl41	3
GO:0099092	GO:0099092	CC	postsynaptic density, intracellular component	2/116	33/18437	0.0182481	0.0656512	0.0454823	Dlgap1/Nos1	2
GO:0031300	GO:0031300	CC	intrinsic component of organelle membrane	5/116	245/18437	0.0193924	0.0689751	0.047785	Bet1/Syt1/Slc17a7/Cnr1/Vamp2	5
GO:0022626	GO:0022626	CC	cytosolic ribosome	5/116	249/18437	0.0206348	0.0725696	0.0502752	Rps6/Rps27a-ps1/Rps27a/Rps15a/Rpl41	5
GO:0005635	GO:0005635	CC	nuclear envelope	7/116	440/18437	0.0212497	0.0739018	0.0511982	Smad3/Gpx4/Kpna4/Nsmf/Nos1/Nos1ap/Vapa	7
GO:0031234	GO:0031234	CC	extrinsic component of cytoplasmic side of plasma membrane	3/116	95/18437	0.0221027	0.0760235	0.052668	Src/Kcnab2/Gna11	3
GO:0019867	GO:0019867	CC	outer membrane	4/116	174/18437	0.0242636	0.0816612	0.0565738	Cnr1/Nos1/Hk1/Dmd	4
GO:0031968	GO:0031968	CC	organelle outer membrane	4/116	174/18437	0.0242636	0.0816612	0.0565738	Cnr1/Nos1/Hk1/Dmd	4
GO:0016363	GO:0016363	CC	nuclear matrix	3/116	99/18437	0.0246008	0.0819156	0.05675	Npm1/Nsmf/Sptbn2	3
GO:0043596	GO:0043596	CC	nuclear replication fork	2/116	41/18437	0.0274338	0.0903871	0.062619	Pold4/Tipin	2
GO:0031514	GO:0031514	CC	motile cilium	4/116	185/18437	0.0294992	0.0961798	0.066632	Ctsh/Pmfbp1/Hk1/Cfap36	4
GO:0042788	GO:0042788	CC	polysomal ribosome	2/116	44/18437	0.031267	0.100892	0.0698969	Eif3h/Rpl41	2
GO:0030141	GO:0030141	CC	secretory granule	6/116	382/18437	0.033762	0.107283	0.0743241	Syt1/Oxt/Ctsh/Vamp2/Nos1/Dmd	6
GO:0015030	GO:0015030	CC	Cajal body	2/116	46/18437	0.0339329	0.107283	0.0743241	Nolc1/Lsg1	2
GO:0032993	GO:0032993	CC	protein-DNA complex	4/116	197/18437	0.0359197	0.112429	0.0778891	Npm1/Pold4/Tinf2/H2afy	4
GO:0036126	GO:0036126	CC	sperm flagellum	3/116	118/18437	0.0384554	0.119174	0.0825619	Ctsh/Pmfbp1/Hk1	3
GO:0098685	GO:0098685	CC	Schaffer collateral - CA1 synapse	3/116	119/18437	0.0392745	0.120519	0.0834939	Chrm1/Cacna1b/Bsn	3
GO:0032838	GO:0032838	CC	plasma membrane bounded cell projection cytoplasm	4/116	208/18437	0.0424625	0.129037	0.0893948	Ctsh/Bsn/Cacna1c/Prkar2a	4
GO:0097729	GO:0097729	CC	9+2 motile cilium	3/116	124/18437	0.0435027	0.130926	0.090704	Ctsh/Pmfbp1/Hk1	3
GO:0001917	GO:0001917	CC	photoreceptor inner segment	2/116	54/18437	0.0454257	0.135412	0.0938115	Nos1/Dnm1	2
GO:0034399	GO:0034399	CC	nuclear periphery	3/116	127/18437	0.0461446	0.136257	0.0943972	Npm1/Nsmf/Sptbn2	3
GO:1904115	GO:1904115	CC	axon cytoplasm	2/116	55/18437	0.0469505	0.137341	0.095148	Bsn/Cacna1c	2
GO:0000805	GO:0000805	CC	X chromosome	1/116	10/18437	0.0611797	0.171002	0.118468	H2afy	1
GO:0019774	GO:0019774	CC	proteasome core complex, beta-subunit complex	1/116	10/18437	0.0611797	0.171002	0.118468	Psmb8	1
GO:0042585	GO:0042585	CC	germinal vesicle	1/116	10/18437	0.0611797	0.171002	0.118468	Prkar2a	1
GO:0044224	GO:0044224	CC	juxtaparanode region of axon	1/116	10/18437	0.0611797	0.171002	0.118468	Kcnab2	1
GO:0099699	GO:0099699	CC	integral component of synaptic membrane	4/116	235/18437	0.0611891	0.171002	0.118468	Chrm1/Grin2b/Cnr1/Cacna1c	4
GO:0044441	GO:0044441	CC	ciliary part	6/116	445/18437	0.0621483	0.172145	0.11926	Ctsh/Pmfbp1/Erc1/Prkar2a/Hk1/Cfap36	6
GO:0016529	GO:0016529	CC	sarcoplasmic reticulum	2/116	66/18437	0.0648887	0.176463	0.122251	Nos1/Nos1ap	2
GO:0000138	GO:0000138	CC	Golgi trans cisterna	1/116	11/18437	0.0670897	0.176463	0.122251	Bet1	1
GO:0000782	GO:0000782	CC	telomere cap complex	1/116	11/18437	0.0670897	0.176463	0.122251	Tinf2	1
GO:0000783	GO:0000783	CC	nuclear telomere cap complex	1/116	11/18437	0.0670897	0.176463	0.122251	Tinf2	1
GO:0002177	GO:0002177	CC	manchette	1/116	11/18437	0.0670897	0.176463	0.122251	Strbp	1
GO:0099569	GO:0099569	CC	presynaptic cytoskeleton	1/116	11/18437	0.0670897	0.176463	0.122251	Bsn	1
GO:0000502	GO:0000502	CC	proteasome complex	2/116	68/18437	0.0683631	0.178314	0.123533	Psma1/Psmb8	2
GO:1905369	GO:1905369	CC	endopeptidase complex	2/116	69/18437	0.070123	0.181393	0.125666	Psma1/Psmb8	2
GO:0017146	GO:0017146	CC	NMDA selective glutamate receptor complex	1/116	12/18437	0.0729628	0.182699	0.126571	Grin2b	1
GO:0043020	GO:0043020	CC	NADPH oxidase complex	1/116	12/18437	0.0729628	0.182699	0.126571	Cyba	1
GO:0071014	GO:0071014	CC	post-mRNA release spliceosomal complex	1/116	12/18437	0.0729628	0.182699	0.126571	Syf2	1
GO:0098684	GO:0098684	CC	photoreceptor ribbon synapse	1/116	12/18437	0.0729628	0.182699	0.126571	Dnm1	1
GO:0005657	GO:0005657	CC	replication fork	2/116	72/18437	0.0754905	0.18685	0.129447	Pold4/Tipin	2
GO:0099240	GO:0099240	CC	intrinsic component of synaptic membrane	4/116	254/18437	0.0765974	0.18685	0.129447	Chrm1/Grin2b/Cnr1/Cacna1c	4
GO:0000974	GO:0000974	CC	Prp19 complex	1/116	13/18437	0.0787992	0.18685	0.129447	Syf2	1
GO:0001674	GO:0001674	CC	female germ cell nucleus	1/116	13/18437	0.0787992	0.18685	0.129447	Prkar2a	1
GO:0005744	GO:0005744	CC	TIM23 mitochondrial import inner membrane translocase complex	1/116	13/18437	0.0787992	0.18685	0.129447	Timm21	1
GO:0031588	GO:0031588	CC	nucleotide-activated protein kinase complex	1/116	13/18437	0.0787992	0.18685	0.129447	Prkar2a	1
GO:0098833	GO:0098833	CC	presynaptic endocytic zone	1/116	13/18437	0.0787992	0.18685	0.129447	Dnm1	1
GO:0099061	GO:0099061	CC	integral component of postsynaptic density membrane	2/116	75/18437	0.0809844	0.190587	0.132036	Chrm1/Grin2b	2
GO:0005766	GO:0005766	CC	primary lysosome	1/116	14/18437	0.0845992	0.191047	0.132355	Nos1	1
GO:0005940	GO:0005940	CC	septin ring	1/116	14/18437	0.0845992	0.191047	0.132355	2019-09-05	1
GO:0031105	GO:0031105	CC	septin complex	1/116	14/18437	0.0845992	0.191047	0.132355	2019-09-05	1
GO:0042582	GO:0042582	CC	azurophil granule	1/116	14/18437	0.0845992	0.191047	0.132355	Nos1	1
GO:0042589	GO:0042589	CC	zymogen granule membrane	1/116	14/18437	0.0845992	0.191047	0.132355	Vamp2	1
GO:0009898	GO:0009898	CC	cytoplasmic side of plasma membrane	3/116	164/18437	0.084842	0.191047	0.132355	Src/Kcnab2/Gna11	3
GO:0000346	GO:0000346	CC	transcription export complex	1/116	15/18437	0.090363	0.202026	0.139961	Sarnp	1
GO:0099146	GO:0099146	CC	intrinsic component of postsynaptic density membrane	2/116	81/18437	0.0923257	0.203219	0.140787	Chrm1/Grin2b	2
GO:0010369	GO:0010369	CC	chromocenter	1/116	16/18437	0.0960908	0.203219	0.140787	Tinf2	1
GO:0032156	GO:0032156	CC	septin cytoskeleton	1/116	16/18437	0.0960908	0.203219	0.140787	2019-09-05	1
GO:0042575	GO:0042575	CC	DNA polymerase complex	1/116	16/18437	0.0960908	0.203219	0.140787	Pold4	1
GO:0042599	GO:0042599	CC	lamellar body	1/116	16/18437	0.0960908	0.203219	0.140787	Ctsh	1
GO:0043196	GO:0043196	CC	varicosity	1/116	16/18437	0.0960908	0.203219	0.140787	Dnm1	1
GO:0044327	GO:0044327	CC	dendritic spine head	1/116	16/18437	0.0960908	0.203219	0.140787	Dnm1	1
GO:0098981	GO:0098981	CC	cholinergic synapse	1/116	16/18437	0.0960908	0.203219	0.140787	Chrm1	1
GO:0099055	GO:0099055	CC	integral component of postsynaptic membrane	3/116	175/18437	0.0983488	0.204869	0.14193	Chrm1/Grin2b/Cacna1c	3
GO:0001725	GO:0001725	CC	stress fiber	2/116	85/18437	0.100128	0.204869	0.14193	Sept5/Cyba	2
GO:0097517	GO:0097517	CC	contractile actin filament bundle	2/116	85/18437	0.100128	0.204869	0.14193	Sept5/Cyba	2
GO:0043204	GO:0043204	CC	perikaryon	3/116	177/18437	0.100893	0.204869	0.14193	Nsmf/Cacna1c/Nos1	3
GO:0031527	GO:0031527	CC	filopodium membrane	1/116	17/18437	0.101783	0.204869	0.14193	Dmd	1
GO:0097449	GO:0097449	CC	astrocyte projection	1/116	17/18437	0.101783	0.204869	0.14193	Dmd	1
GO:0030667	GO:0030667	CC	secretory granule membrane	2/116	86/18437	0.102107	0.204869	0.14193	Syt1/Vamp2	2
GO:0044304	GO:0044304	CC	main axon	2/116	86/18437	0.102107	0.204869	0.14193	Kcnab2/Dnm1	2
GO:0019897	GO:0019897	CC	extrinsic component of plasma membrane	3/116	179/18437	0.103464	0.20627	0.142901	Src/Kcnab2/Gna11	3
GO:0031985	GO:0031985	CC	Golgi cisterna	2/116	90/18437	0.110129	0.214473	0.148584	Bet1/Smpd3	2
GO:0120111	GO:0120111	CC	neuron projection cytoplasm	2/116	90/18437	0.110129	0.214473	0.148584	Bsn/Cacna1c	2
GO:0098936	GO:0098936	CC	intrinsic component of postsynaptic membrane	3/116	185/18437	0.111332	0.214473	0.148584	Chrm1/Grin2b/Cacna1c	3
GO:0000313	GO:0000313	CC	organellar ribosome	2/116	91/18437	0.11216	0.214473	0.148584	Mrps15/Mrpl46	2
GO:0005761	GO:0005761	CC	mitochondrial ribosome	2/116	91/18437	0.11216	0.214473	0.148584	Mrps15/Mrpl46	2
GO:0016010	GO:0016010	CC	dystrophin-associated glycoprotein complex	1/116	19/18437	0.113061	0.214473	0.148584	Dmd	1
GO:0031616	GO:0031616	CC	spindle pole centrosome	1/116	19/18437	0.113061	0.214473	0.148584	Npm1	1
GO:0090665	GO:0090665	CC	glycoprotein complex	1/116	19/18437	0.113061	0.214473	0.148584	Dmd	1
GO:1905368	GO:1905368	CC	peptidase complex	2/116	92/18437	0.114201	0.21533	0.149178	Psma1/Psmb8	2
GO:0032432	GO:0032432	CC	actin filament bundle	2/116	94/18437	0.118311	0.22105	0.153141	Sept5/Cyba	2
GO:0043034	GO:0043034	CC	costamere	1/116	20/18437	0.118647	0.22105	0.153141	Dmd	1
GO:0019866	GO:0019866	CC	organelle inner membrane	5/116	413/18437	0.119469	0.221264	0.153289	Smad3/Src/Tmem14c/Dmd/Timm21	5
GO:0030864	GO:0030864	CC	cortical actin cytoskeleton	2/116	95/18437	0.12038	0.22164	0.153549	Sptb/Sptbn2	2
GO:0005764	GO:0005764	CC	lysosome	5/116	416/18437	0.122142	0.222608	0.15422	Src/Ctsh/Nos1/Mmd/Dpp7	5
GO:0042641	GO:0042641	CC	actomyosin	2/116	96/18437	0.122458	0.222608	0.15422	Sept5/Cyba	2
GO:0000323	GO:0000323	CC	lytic vacuole	5/116	417/18437	0.123039	0.222608	0.15422	Src/Ctsh/Nos1/Mmd/Dpp7	5
GO:0099571	GO:0099571	CC	postsynaptic cytoskeleton	1/116	21/18437	0.124198	0.223414	0.154778	Sptbn2	1
GO:0031594	GO:0031594	CC	neuromuscular junction	2/116	99/18437	0.128744	0.227396	0.157537	Unc13a/Unc13c	2
GO:0098839	GO:0098839	CC	postsynaptic density membrane	2/116	99/18437	0.128744	0.227396	0.157537	Chrm1/Grin2b	2
GO:1902911	GO:1902911	CC	protein kinase complex	2/116	99/18437	0.128744	0.227396	0.157537	Erc1/Prkar2a	2
GO:0005721	GO:0005721	CC	pericentric heterochromatin	1/116	22/18437	0.129715	0.227396	0.157537	H2afy	1
GO:0005759	GO:0005759	CC	mitochondrial matrix	4/116	309/18437	0.130771	0.227396	0.157537	Acadm/Mrps15/Mterf1/Mrpl46	4
GO:0019898	GO:0019898	CC	extrinsic component of membrane	4/116	309/18437	0.130771	0.227396	0.157537	Src/Kcnab2/Gna11/Bsn	4
GO:0036464	GO:0036464	CC	cytoplasmic ribonucleoprotein granule	3/116	202/18437	0.134798	0.232508	0.161079	Rps6/Sarnp/Ctsh	3
GO:0043601	GO:0043601	CC	nuclear replisome	1/116	23/18437	0.135197	0.232508	0.161079	Pold4	1
GO:0005732	GO:0005732	CC	small nucleolar ribonucleoprotein complex	1/116	24/18437	0.140645	0.237955	0.164852	Nolc1	1
GO:0030894	GO:0030894	CC	replisome	1/116	24/18437	0.140645	0.237955	0.164852	Pold4	1
GO:0042588	GO:0042588	CC	zymogen granule	1/116	24/18437	0.140645	0.237955	0.164852	Vamp2	1
GO:0098562	GO:0098562	CC	cytoplasmic side of membrane	3/116	208/18437	0.143461	0.240512	0.166623	Src/Kcnab2/Gna11	3
GO:0044815	GO:0044815	CC	DNA packaging complex	2/116	106/18437	0.143692	0.240512	0.166623	Ncaph2/H2afy	2
GO:0015934	GO:0015934	CC	large ribosomal subunit	3/116	210/18437	0.14639	0.243723	0.168848	Npm1/Rpl41/Mrpl46	3
GO:0099060	GO:0099060	CC	integral component of postsynaptic specialization membrane	2/116	108/18437	0.148029	0.245148	0.169835	Chrm1/Grin2b	2
GO:0099523	GO:0099523	CC	presynaptic cytosol	1/116	26/18437	0.151438	0.249475	0.172833	Trim9	1
GO:0035770	GO:0035770	CC	ribonucleoprotein granule	3/116	216/18437	0.155291	0.254483	0.176302	Rps6/Sarnp/Ctsh	3
GO:0031045	GO:0031045	CC	dense core granule	1/116	27/18437	0.156785	0.255149	0.176764	Syt1	1
GO:0000139	GO:0000139	CC	Golgi membrane	5/116	453/18437	0.157328	0.255149	0.176764	Bet1/Smpd3/Erc1/Sptbn2/Rtn3	5
GO:0098948	GO:0098948	CC	intrinsic component of postsynaptic specialization membrane	2/116	114/18437	0.161193	0.260069	0.180173	Chrm1/Grin2b	2
GO:0097038	GO:0097038	CC	perinuclear endoplasmic reticulum	1/116	28/18437	0.162098	0.260188	0.180255	Cyba	1
GO:0000314	GO:0000314	CC	organellar small ribosomal subunit	1/116	29/18437	0.167378	0.264012	0.182904	Mrps15	1
GO:0005763	GO:0005763	CC	mitochondrial small ribosomal subunit	1/116	29/18437	0.167378	0.264012	0.182904	Mrps15	1
GO:0097228	GO:0097228	CC	sperm principal piece	1/116	29/18437	0.167378	0.264012	0.182904	Hk1	1
GO:0005930	GO:0005930	CC	axoneme	2/116	117/18437	0.167854	0.264012	0.182904	Ctsh/Prkar2a	2
GO:0097014	GO:0097014	CC	ciliary plasm	2/116	118/18437	0.170085	0.266184	0.184408	Ctsh/Prkar2a	2
GO:0005923	GO:0005923	CC	bicellular tight junction	2/116	120/18437	0.174562	0.270211	0.187199	Esam/Vapa	2
GO:0005795	GO:0005795	CC	Golgi stack	2/116	121/18437	0.176808	0.270211	0.187199	Bet1/Smpd3	2
GO:0005834	GO:0005834	CC	heterotrimeric G-protein complex	1/116	31/18437	0.177839	0.270211	0.187199	Gna11	1
GO:0071007	GO:0071007	CC	U2-type catalytic step 2 spliceosome	1/116	31/18437	0.177839	0.270211	0.187199	Syf2	1
GO:0097386	GO:0097386	CC	glial cell projection	1/116	31/18437	0.177839	0.270211	0.187199	Dmd	1
GO:1905360	GO:1905360	CC	GTPase complex	1/116	31/18437	0.177839	0.270211	0.187199	Gna11	1
GO:0002102	GO:0002102	CC	podosome	1/116	32/18437	0.18302	0.276741	0.191722	Src	1
GO:0015629	GO:0015629	CC	actin cytoskeleton	5/116	483/18437	0.188583	0.283782	0.1966	Sptb/Src/Sept5/Cyba/Sptbn2	5
GO:0070160	GO:0070160	CC	tight junction	2/116	127/18437	0.190375	0.28447	0.197077	Esam/Vapa	2
GO:0097223	GO:0097223	CC	sperm part	3/116	239/18437	0.190858	0.28447	0.197077	Ctsh/Pmfbp1/Hk1	3
GO:0043073	GO:0043073	CC	germ cell nucleus	1/116	34/18437	0.193286	0.285338	0.197678	Prkar2a	1
GO:0097546	GO:0097546	CC	ciliary base	1/116	34/18437	0.193286	0.285338	0.197678	Cfap36	1
GO:0005743	GO:0005743	CC	mitochondrial inner membrane	4/116	362/18437	0.194176	0.285338	0.197678	Src/Tmem14c/Dmd/Timm21	4
GO:0019905	GO:0019905	MF	syntaxin binding	7/110	79/16869	8.1454e-07	0.000155581	0.000129338	Bet1/Unc13a/Syt1/Doc2b/Sept5/Vamp2/Unc13c	7
GO:0000149	GO:0000149	MF	SNARE binding	8/110	115/16869	8.38712e-07	0.000155581	0.000129338	Bet1/Unc13a/Trim9/Syt1/Doc2b/Sept5/Vamp2/Unc13c	8
GO:0005516	GO:0005516	MF	calmodulin binding	8/110	169/16869	1.47937e-05	0.00182949	0.0015209	Pcp4/Unc13a/Syt1/Itpkc/Vamp2/Cacna1c/Unc13c/Nos1	8
GO:0017075	GO:0017075	MF	syntaxin-1 binding	4/110	27/16869	2.67571e-05	0.00248172	0.00206312	Unc13a/Syt1/Vamp2/Unc13c	4
GO:0098918	GO:0098918	MF	structural constituent of synapse	4/110	30/16869	4.11577e-05	0.002946	0.00244908	Dlgap1/Bsn/Erc1/Sptbn2	4
GO:0022843	GO:0022843	MF	voltage-gated cation channel activity	7/110	146/16869	4.76443e-05	0.002946	0.00244908	Kcnab2/Grin2b/Cacna1b/Cnr1/Kcnj8/Cacna1c/Erc1	7
GO:0099626	GO:0099626	MF	voltage-gated calcium channel activity involved in regulation of presynaptic cytosolic calcium levels	3/110	13/16869	7.3575e-05	0.00389947	0.00324173	Cacna1b/Cnr1/Erc1	3
GO:0099511	GO:0099511	MF	voltage-gated calcium channel activity involved in regulation of cytosolic calcium levels	3/110	14/16869	9.31966e-05	0.00432199	0.00359297	Cacna1b/Cnr1/Erc1	3
GO:0005262	GO:0005262	MF	calcium channel activity	6/110	119/16869	0.000127978	0.00527554	0.00438568	Grin2b/Jph4/Cacna1b/Cnr1/Cacna1c/Erc1	6
GO:0015085	GO:0015085	MF	calcium ion transmembrane transporter activity	6/110	134/16869	0.00024465	0.00824234	0.00685205	Grin2b/Jph4/Cacna1b/Cnr1/Cacna1c/Erc1	6
GO:0022839	GO:0022839	MF	ion gated channel activity	9/110	326/16869	0.000282566	0.00824234	0.00685205	Kcnab2/Grin2b/Jph4/Cacna1b/Slc17a7/Cnr1/Kcnj8/Cacna1c/Erc1	9
GO:0005244	GO:0005244	MF	voltage-gated ion channel activity	7/110	195/16869	0.000288815	0.00824234	0.00685205	Kcnab2/Grin2b/Cacna1b/Cnr1/Kcnj8/Cacna1c/Erc1	7
GO:0022832	GO:0022832	MF	voltage-gated channel activity	7/110	195/16869	0.000288815	0.00824234	0.00685205	Kcnab2/Grin2b/Cacna1b/Cnr1/Kcnj8/Cacna1c/Erc1	7
GO:0005245	GO:0005245	MF	voltage-gated calcium channel activity	4/110	50/16869	0.000312888	0.00829154	0.00689296	Cacna1b/Cnr1/Cacna1c/Erc1	4
GO:0022836	GO:0022836	MF	gated channel activity	9/110	337/16869	0.000360319	0.00880174	0.00731709	Kcnab2/Grin2b/Jph4/Cacna1b/Slc17a7/Cnr1/Kcnj8/Cacna1c/Erc1	9
GO:0050998	GO:0050998	MF	nitric-oxide synthase binding	3/110	22/16869	0.00037959	0.00880174	0.00731709	Nos1ap/Dmd/Dnm1	3
GO:0008022	GO:0008022	MF	protein C-terminus binding	7/110	234/16869	0.000856833	0.0186991	0.015545	Sarnp/Src/Syt1/Cacna1b/Kpna3/Vamp2/Dnm1	7
GO:0005261	GO:0005261	MF	cation channel activity	8/110	317/16869	0.00110974	0.022873	0.0190148	Kcnab2/Grin2b/Jph4/Cacna1b/Cnr1/Kcnj8/Cacna1c/Erc1	8
GO:0005216	GO:0005216	MF	ion channel activity	9/110	406/16869	0.0013536	0.0264308	0.0219725	Kcnab2/Grin2b/Jph4/Cacna1b/Slc17a7/Cnr1/Kcnj8/Cacna1c/Erc1	9
GO:0022838	GO:0022838	MF	substrate-specific channel activity	9/110	417/16869	0.00162678	0.0295589	0.024573	Kcnab2/Grin2b/Jph4/Cacna1b/Slc17a7/Cnr1/Kcnj8/Cacna1c/Erc1	9
GO:0005543	GO:0005543	MF	phospholipid binding	9/110	424/16869	0.00182257	0.0295589	0.024573	Npm1/Sptb/Unc13a/Syt1/Doc2b/Sept5/Vamp2/Unc13c/Sptbn2	9
GO:0008331	GO:0008331	MF	high voltage-gated calcium channel activity	2/110	10/16869	0.00183249	0.0295589	0.024573	Cacna1b/Cacna1c	2
GO:0016505	GO:0016505	MF	peptidase activator activity involved in apoptotic process	2/110	10/16869	0.00183249	0.0295589	0.024573	Apaf1/Ctsh	2
GO:0046873	GO:0046873	MF	metal ion transmembrane transporter activity	9/110	430/16869	0.00200506	0.0309949	0.0257668	Kcnab2/Grin2b/Jph4/Cacna1b/Slc17a7/Cnr1/Kcnj8/Cacna1c/Erc1	9
GO:0004177	GO:0004177	MF	aminopeptidase activity	3/110	41/16869	0.0024016	0.0340917	0.0283413	Ctsh/Mmp16/Dpp7	3
GO:0044325	GO:0044325	MF	ion channel binding	5/110	143/16869	0.00244945	0.0340917	0.0283413	Src/Kcnab2/Vamp2/Cacna1c/Nos1	5
GO:0015267	GO:0015267	MF	channel activity	9/110	447/16869	0.00260269	0.0340917	0.0283413	Kcnab2/Grin2b/Jph4/Cacna1b/Slc17a7/Cnr1/Kcnj8/Cacna1c/Erc1	9
GO:0022803	GO:0022803	MF	passive transmembrane transporter activity	9/110	447/16869	0.00260269	0.0340917	0.0283413	Kcnab2/Grin2b/Jph4/Cacna1b/Slc17a7/Cnr1/Kcnj8/Cacna1c/Erc1	9
GO:0005536	GO:0005536	MF	glucose binding	2/110	12/16869	0.00266485	0.0340917	0.0283413	Galt/Hk1	2
GO:0061608	GO:0061608	MF	nuclear import signal receptor activity	2/110	15/16869	0.00418577	0.051764	0.0430327	Kpna4/Kpna3	2
GO:0004860	GO:0004860	MF	protein kinase inhibitor activity	3/110	52/16869	0.00472745	0.0565769	0.0470337	Npm1/Prkar2a/H2afy	3
GO:0019210	GO:0019210	MF	kinase inhibitor activity	3/110	57/16869	0.00611366	0.0708802	0.0589244	Npm1/Prkar2a/H2afy	3
GO:0003743	GO:0003743	MF	translation initiation factor activity	3/110	59/16869	0.00672902	0.0756505	0.06289	Eif4ebp2/Eif3h/LOC108348062	3
GO:0030165	GO:0030165	MF	PDZ domain binding	4/110	121/16869	0.00811023	0.0884969	0.0735696	Lzts3/Erc1/Nos1ap/Dmd	4
GO:0019200	GO:0019200	MF	carbohydrate kinase activity	2/110	22/16869	0.00893916	0.0947551	0.0787721	Pfkfb3/Hk1	2
GO:0004298	GO:0004298	MF	threonine-type endopeptidase activity	2/110	23/16869	0.00974913	0.0977548	0.0812658	Psma1/Psmb8	2
GO:0070003	GO:0070003	MF	threonine-type peptidase activity	2/110	23/16869	0.00974913	0.0977548	0.0812658	Psma1/Psmb8	2
GO:0043621	GO:0043621	MF	protein self-association	3/110	69/16869	0.0103484	0.0998108	0.082975	Lzts3/Ctsh/Foxp1	3
GO:0015276	GO:0015276	MF	ligand-gated ion channel activity	4/110	131/16869	0.0106472	0.0998108	0.082975	Grin2b/Jph4/Slc17a7/Kcnj8	4
GO:0048306	GO:0048306	MF	calcium-dependent protein binding	3/110	70/16869	0.0107613	0.0998108	0.082975	Syt1/Nsmf/Vamp2	3
GO:0022834	GO:0022834	MF	ligand-gated channel activity	4/110	134/16869	0.0114976	0.104039	0.0864902	Grin2b/Jph4/Slc17a7/Kcnj8	4
GO:0050780	GO:0050780	MF	dopamine receptor binding	2/110	26/16869	0.0123656	0.104265	0.0866777	Grin2b/Dnm1	2
GO:0099604	GO:0099604	MF	ligand-gated calcium channel activity	2/110	26/16869	0.0123656	0.104265	0.0866777	Grin2b/Jph4	2
GO:0140142	GO:0140142	MF	nucleocytoplasmic carrier activity	2/110	26/16869	0.0123656	0.104265	0.0866777	Kpna4/Kpna3	2
GO:0097110	GO:0097110	MF	scaffold protein binding	3/110	75/16869	0.0129679	0.106913	0.0888797	Src/Grin2b/Nos1	3
GO:0019902	GO:0019902	MF	phosphatase binding	5/110	216/16869	0.0135994	0.109682	0.0911812	Smad3/Cacna1b/Cry1/Cacna1c/Ppara	5
GO:0019706	GO:0019706	MF	protein-cysteine S-palmitoyltransferase activity	2/110	28/16869	0.0142611	0.110227	0.0916341	Zdhhc8/Zdhhc23	2
GO:0019707	GO:0019707	MF	protein-cysteine S-acyltransferase activity	2/110	28/16869	0.0142611	0.110227	0.0916341	Zdhhc8/Zdhhc23	2
GO:0016504	GO:0016504	MF	peptidase activator activity	2/110	29/16869	0.015253	0.113177	0.0940869	Apaf1/Ctsh	2
GO:0030291	GO:0030291	MF	protein serine/threonine kinase inhibitor activity	2/110	29/16869	0.015253	0.113177	0.0940869	Prkar2a/H2afy	2
GO:0003735	GO:0003735	MF	structural constituent of ribosome	6/110	310/16869	0.0159854	0.116286	0.0966713	Rps6/Rps27a/Rps15a/Mrps15/Rpl41/Mrpl46	6
GO:0035257	GO:0035257	MF	nuclear hormone receptor binding	4/110	151/16869	0.017141	0.122294	0.101666	Smad3/Src/Cry1/Foxp1	4
GO:0016651	GO:0016651	MF	oxidoreductase activity, acting on NAD(P)H	3/110	84/16869	0.0175465	0.122826	0.102108	Nos1/Cyba/Txnrd2	3
GO:0016417	GO:0016417	MF	S-acyltransferase activity	2/110	32/16869	0.0183999	0.126414	0.105091	Zdhhc8/Zdhhc23	2
GO:0008081	GO:0008081	MF	phosphoric diester hydrolase activity	3/110	87/16869	0.0192482	0.129102	0.107325	Smpd3/Gna11/Prkar2a	3
GO:0051059	GO:0051059	MF	NF-kappaB binding	2/110	33/16869	0.0195046	0.129102	0.107325	Npm1/Nfkbib	2
GO:0050660	GO:0050660	MF	flavin adenine dinucleotide binding	3/110	88/16869	0.019835	0.129102	0.107325	Acadm/Nos1/Txnrd2	3
GO:0043028	GO:0043028	MF	cysteine-type endopeptidase regulator activity involved in apoptotic process	2/110	34/16869	0.0206366	0.132003	0.109737	Apaf1/Ctsh	2
GO:0035258	GO:0035258	MF	steroid hormone receptor binding	3/110	90/16869	0.0210381	0.132291	0.109976	Smad3/Src/Foxp1	3
GO:0005231	GO:0005231	MF	excitatory extracellular ligand-gated ion channel activity	2/110	35/16869	0.0217953	0.134768	0.112036	Grin2b/Slc17a7	2
GO:0008135	GO:0008135	MF	translation factor activity, RNA binding	3/110	93/16869	0.0229165	0.137513	0.114317	Eif4ebp2/Eif3h/LOC108348062	3
GO:0031369	GO:0031369	MF	translation initiation factor binding	2/110	36/16869	0.0229805	0.137513	0.114317	Eif4ebp2/Cacna1c	2
GO:0016409	GO:0016409	MF	palmitoyltransferase activity	2/110	38/16869	0.0254287	0.149747	0.124488	Zdhhc8/Zdhhc23	2
GO:0099094	GO:0099094	MF	ligand-gated cation channel activity	3/110	99/16869	0.0269387	0.15616	0.12982	Grin2b/Jph4/Kcnj8	3
GO:0051721	GO:0051721	MF	protein phosphatase 2A binding	2/110	40/16869	0.0279779	0.159406	0.132518	Cacna1b/Cacna1c	2
GO:0008238	GO:0008238	MF	exopeptidase activity	3/110	101/16869	0.0283579	0.159406	0.132518	Ctsh/Mmp16/Dpp7	3
GO:0051427	GO:0051427	MF	hormone receptor binding	4/110	180/16869	0.0302302	0.167394	0.139159	Smad3/Src/Cry1/Foxp1	4
GO:0005525	GO:0005525	MF	GTP binding	6/110	364/16869	0.0319505	0.174318	0.144915	Nudt2/Gna11/Nolc1/Sept5/Lsg1/Dnm1	6
GO:0032550	GO:0032550	MF	purine ribonucleoside binding	6/110	371/16869	0.0345817	0.185939	0.154576	Nudt2/Gna11/Nolc1/Sept5/Lsg1/Dnm1	6
GO:0001883	GO:0001883	MF	purine nucleoside binding	6/110	374/16869	0.0357512	0.188879	0.157019	Nudt2/Gna11/Nolc1/Sept5/Lsg1/Dnm1	6
GO:0032549	GO:0032549	MF	ribonucleoside binding	6/110	375/16869	0.0361466	0.188879	0.157019	Nudt2/Gna11/Nolc1/Sept5/Lsg1/Dnm1	6
GO:0001882	GO:0001882	MF	nucleoside binding	6/110	383/16869	0.0394119	0.203081	0.168826	Nudt2/Gna11/Nolc1/Sept5/Lsg1/Dnm1	6
GO:0032561	GO:0032561	MF	guanyl ribonucleotide binding	6/110	386/16869	0.0406834	0.204153	0.169717	Nudt2/Gna11/Nolc1/Sept5/Lsg1/Dnm1	6
GO:0019001	GO:0019001	MF	guanyl nucleotide binding	6/110	387/16869	0.041113	0.204153	0.169717	Nudt2/Gna11/Nolc1/Sept5/Lsg1/Dnm1	6
GO:0001221	GO:0001221	MF	transcription cofactor binding	2/110	50/16869	0.0421382	0.204153	0.169717	Bsn/Ppara	2
GO:0140104	GO:0140104	MF	molecular carrier activity	2/110	50/16869	0.0421382	0.204153	0.169717	Kpna4/Kpna3	2
GO:0001664	GO:0001664	MF	G protein-coupled receptor binding	5/110	292/16869	0.0423713	0.204153	0.169717	Oxt/Gna11/Grin2b/Prkar2a/Dnm1	5
GO:0005544	GO:0005544	MF	calcium-dependent phospholipid binding	2/110	52/16869	0.0452334	0.215149	0.178858	Syt1/Doc2b	2
GO:0099529	GO:0099529	MF	neurotransmitter receptor activity involved in regulation of postsynaptic membrane potential	2/110	55/16869	0.0500279	0.234941	0.195312	Chrm1/Grin2b	2
GO:0001047	GO:0001047	MF	core promoter binding	2/110	57/16869	0.0533217	0.239629	0.199209	Npm1/H2afy	2
GO:0050661	GO:0050661	MF	NADP binding	2/110	57/16869	0.0533217	0.239629	0.199209	Hibadh/Nos1	2
GO:0098960	GO:0098960	MF	postsynaptic neurotransmitter receptor activity	2/110	57/16869	0.0533217	0.239629	0.199209	Chrm1/Grin2b	2
GO:0016616	GO:0016616	MF	oxidoreductase activity, acting on the CH-OH group of donors, NAD or NADP as acceptor	3/110	131/16869	0.0542557	0.239629	0.199209	Kcnab2/Hibadh/Hsd17b12	3
GO:0047485	GO:0047485	MF	protein N-terminus binding	3/110	131/16869	0.0542557	0.239629	0.199209	Npm1/Unc13a/Cfap36	3
GO:0005200	GO:0005200	MF	structural constituent of cytoskeleton	2/110	58/16869	0.0549969	0.240045	0.199555	Sptb/Sptbn2	2
