# Supplementary material for: Genetic regulatory subnetworks and key regulating genes in rat hippocampus perturbed by prenatal malnutrition: implications for major brain disorders
Source: Aging (Albany NY). 2020 May 11;12(9):8434–58. doi: 10.18632/aging.103150 (PMC7244046; doi:10.18632/aging.103150)
Supplement: Supplementary Table 4 [file aging-12-103150-s006.xlsx]

## Sheet: Blue
#node1	node2	node1_string_internal_id	node2_string_internal_id	node1_external_id	node2_external_id	neighborhood_on_chromosome	gene_fusion	phylogenetic_cooccurrence	homology	coexpression	experimentally_determined_interaction	database_annotated	automated_textmining	combined_score
Rps25	Rps23	5048636	5045083	10116.ENSRNOP00000033144	10116.ENSRNOP00000022348	0	0	0	0	0.773	0.914	0.9	0.579	0.999
Rps14	Rps27	5054455	5045301	10116.ENSRNOP00000056260	10116.ENSRNOP00000022897	0	0	0	0	0.71	0.92	0.9	0.753	0.999
Rps25	Rps27	5048636	5045301	10116.ENSRNOP00000033144	10116.ENSRNOP00000022897	0	0	0	0	0.774	0.917	0.9	0.58	0.999
Ube2i	Sumo1	5045882	5044974	10116.ENSRNOP00000024406	10116.ENSRNOP00000022048	0	0	0	0	0.141	0.982	0.9	0.799	0.999
Rps23	Rps12	5045083	5045022	10116.ENSRNOP00000022348	10116.ENSRNOP00000022184	0.045	0	0	0	0.925	0.912	0.9	0.553	0.999
Rps10	Rps3	5055923	5045692	10116.ENSRNOP00000061642	10116.ENSRNOP00000023935	0	0	0	0	0.919	0.907	0.9	0.585	0.999
Tsc1	Tsc2	5043113	5042855	10116.ENSRNOP00000016904	10116.ENSRNOP00000016221	0	0	0	0	0.064	0.909	0.9	0.973	0.999
Rps3	Rps12	5045692	5045022	10116.ENSRNOP00000023935	10116.ENSRNOP00000022184	0.045	0	0	0	0.912	0.912	0.9	0.333	0.999
Rps14	Rps23	5054455	5045083	10116.ENSRNOP00000056260	10116.ENSRNOP00000022348	0.085	0	0	0	0.697	0.92	0.9	0.629	0.999
Rps10	Rps15	5055923	5049079	10116.ENSRNOP00000061642	10116.ENSRNOP00000035156	0	0	0	0	0.918	0.907	0.9	0.61	0.999
Uqcrq	Uqcrh	5057601	5043060	10116.ENSRNOP00000065074	10116.ENSRNOP00000016751	0	0	0	0	0.889	0.887	0.8	0.767	0.999
Rps12	Rpl10a	5045022	5037475	10116.ENSRNOP00000022184	10116.ENSRNOP00000000603	0.043	0	0	0	0.914	0.906	0.9	0.099	0.999
Trappc1	Trappc3	5053910	5042188	10116.ENSRNOP00000053911	10116.ENSRNOP00000014383	0	0	0	0	0.099	0.969	0.9	0.676	0.999
Rps15	Rps12	5049079	5045022	10116.ENSRNOP00000035156	10116.ENSRNOP00000022184	0.045	0	0	0	0.829	0.911	0.9	0.537	0.999
Rps27	Rps23	5045301	5045083	10116.ENSRNOP00000022897	10116.ENSRNOP00000022348	0	0	0	0	0.931	0.92	0.9	0.62	0.999
Rps3	Rps23	5045692	5045083	10116.ENSRNOP00000023935	10116.ENSRNOP00000022348	0.086	0	0	0	0.918	0.919	0.9	0.23	0.999
Rps3	Rps27	5045692	5045301	10116.ENSRNOP00000023935	10116.ENSRNOP00000022897	0	0	0	0	0.872	0.92	0.9	0.566	0.999
Rps14	Rps3	5054455	5045692	10116.ENSRNOP00000056260	10116.ENSRNOP00000023935	0.086	0	0	0	0.787	0.92	0.9	0.71	0.999
Rps12	Rpl19	5045022	5039407	10116.ENSRNOP00000022184	10116.ENSRNOP00000006359	0	0	0	0	0.903	0.879	0.9	0.242	0.999
Uba52	Rpl10a	5046917	5037475	10116.ENSRNOP00000027073	10116.ENSRNOP00000000603	0	0	0	0	0.907	0.949	0.9	0.519	0.999
Tceb1	Tceb2	5059457	5039605	10116.ENSRNOP00000067410	10116.ENSRNOP00000006892	0	0	0	0	0.174	0.951	0.9	0.9	0.999
Rps15	Rps27	5049079	5045301	10116.ENSRNOP00000035156	10116.ENSRNOP00000022897	0	0	0	0	0.901	0.92	0.9	0.597	0.999
Uba52	Rps12	5046917	5045022	10116.ENSRNOP00000027073	10116.ENSRNOP00000022184	0	0	0	0	0.933	0.925	0.9	0.111	0.999
Rps27	Rps12	5045301	5045022	10116.ENSRNOP00000022897	10116.ENSRNOP00000022184	0	0	0	0	0.91	0.916	0.9	0.49	0.999
Rps23	Rpl19	5045083	5039407	10116.ENSRNOP00000022348	10116.ENSRNOP00000006359	0	0	0	0	0.823	0.89	0.9	0.325	0.998
Rpl19	Rpl10a	5039407	5037475	10116.ENSRNOP00000006359	10116.ENSRNOP00000000603	0	0	0	0	0.814	0.885	0.9	0.348	0.998
Rps14	Rps12	5054455	5045022	10116.ENSRNOP00000056260	10116.ENSRNOP00000022184	0.044	0	0	0	0.684	0.916	0.9	0.454	0.998
Rps25	Rps12	5048636	5045022	10116.ENSRNOP00000033144	10116.ENSRNOP00000022184	0	0	0	0	0.76	0.89	0.9	0.363	0.998
Rps10	Rps25	5055923	5048636	10116.ENSRNOP00000061642	10116.ENSRNOP00000033144	0	0	0	0	0.716	0.888	0.9	0.519	0.998
Rps13	Rps25	5049430	5048636	10116.ENSRNOP00000036690	10116.ENSRNOP00000033144	0	0	0	0	0.531	0.907	0.9	0.595	0.998
Rps14	Rps15	5054455	5049079	10116.ENSRNOP00000056260	10116.ENSRNOP00000035156	0.086	0	0	0	0.692	0.92	0.9	0.598	0.998
Rps23	Rpl10a	5045083	5037475	10116.ENSRNOP00000022348	10116.ENSRNOP00000000603	0.083	0	0	0	0.848	0.918	0.9	0.13	0.998
Ap2b1	Arrb1	5060044	5051878	10116.ENSRNOP00000068516	10116.ENSRNOP00000046069	0	0	0	0	0	0.982	0.9	0.227	0.998
Rps13	Rps3	5049430	5045692	10116.ENSRNOP00000036690	10116.ENSRNOP00000023935	0	0	0	0	0.613	0.918	0.9	0.575	0.998
Rps25	Rps3	5048636	5045692	10116.ENSRNOP00000033144	10116.ENSRNOP00000023935	0	0	0	0	0.766	0.914	0.9	0.402	0.998
Rps15	Rps3	5049079	5045692	10116.ENSRNOP00000035156	10116.ENSRNOP00000023935	0.088	0	0	0	0.905	0.61	0.9	0.572	0.998
Rps10	Rps23	5055923	5045083	10116.ENSRNOP00000061642	10116.ENSRNOP00000022348	0	0	0	0	0.716	0.907	0.9	0.585	0.998
Uba52	Rpl23	5046917	5039094	10116.ENSRNOP00000027073	10116.ENSRNOP00000005471	0	0	0	0	0.631	0.949	0.9	0.216	0.998
Rps10	Rps27	5055923	5045301	10116.ENSRNOP00000061642	10116.ENSRNOP00000022897	0	0	0	0	0.669	0.915	0.9	0.575	0.998
Rps13	Rps15	5049430	5049079	10116.ENSRNOP00000036690	10116.ENSRNOP00000035156	0	0	0	0	0.578	0.918	0.9	0.491	0.998
Uba52	Rps27	5046917	5045301	10116.ENSRNOP00000027073	10116.ENSRNOP00000022897	0	0	0	0	0.94	0.966	0	0.286	0.998
Rps15	Rps25	5049079	5048636	10116.ENSRNOP00000035156	10116.ENSRNOP00000033144	0	0	0	0	0.728	0.914	0.9	0.595	0.998
Rps10	Rps12	5055923	5045022	10116.ENSRNOP00000061642	10116.ENSRNOP00000022184	0	0	0	0	0.817	0.885	0.9	0.563	0.998
Rps15	Rps23	5049079	5045083	10116.ENSRNOP00000035156	10116.ENSRNOP00000022348	0.086	0	0	0	0.763	0.919	0.9	0.359	0.998
Rps10	Rps14	5055923	5054455	10116.ENSRNOP00000061642	10116.ENSRNOP00000056260	0	0	0	0	0.681	0.915	0.9	0.658	0.998
Uba52	Rplp1	5046917	5042729	10116.ENSRNOP00000027073	10116.ENSRNOP00000015893	0	0	0	0	0.87	0.858	0.9	0.231	0.998
Rps14	Rps25	5054455	5048636	10116.ENSRNOP00000056260	10116.ENSRNOP00000033144	0	0	0	0	0.575	0.917	0.9	0.531	0.998
Rps14	Rps13	5054455	5049430	10116.ENSRNOP00000056260	10116.ENSRNOP00000036690	0	0	0	0	0.602	0.919	0.9	0.519	0.998
Uba52	Rpl19	5046917	5039407	10116.ENSRNOP00000027073	10116.ENSRNOP00000006359	0	0	0	0	0.845	0.918	0.9	0.205	0.998
Rplp1	Rpl19	5042729	5039407	10116.ENSRNOP00000015893	10116.ENSRNOP00000006359	0	0	0	0	0.897	0.587	0.9	0.412	0.997
Rpl36	Rpl10a	5055066	5037475	10116.ENSRNOP00000058934	10116.ENSRNOP00000000603	0	0	0	0	0.574	0.913	0.9	0.356	0.997
Rps23	Rpl23	5045083	5039094	10116.ENSRNOP00000022348	10116.ENSRNOP00000005471	0.085	0	0.224	0	0.617	0.918	0.9	0.153	0.997
Os9	Sel1l	5051576	5051121	10116.ENSRNOP00000044914	10116.ENSRNOP00000043232	0	0	0	0	0.124	0.858	0.9	0.825	0.997
Rpl36	Uba52	5055066	5046917	10116.ENSRNOP00000058934	10116.ENSRNOP00000027073	0	0	0	0	0.638	0.927	0.9	0.211	0.997
Cry2	Clock	5040680	5038261	10116.ENSRNOP00000010142	10116.ENSRNOP00000002976	0	0	0	0	0.063	0.911	0.6	0.935	0.997
Rps13	Rps23	5049430	5045083	10116.ENSRNOP00000036690	10116.ENSRNOP00000022348	0	0	0	0	0.614	0.918	0.9	0.39	0.997
Polr1c	Polr1b	5046389	5046051	10116.ENSRNOP00000025787	10116.ENSRNOP00000024882	0.103	0	0	0	0.708	0.857	0.9	0.529	0.997
Rps13	Rpl23	5049430	5039094	10116.ENSRNOP00000036690	10116.ENSRNOP00000005471	0	0	0	0	0.609	0.917	0.9	0.218	0.997
Polr1c	Znrd1	5046389	5037588	10116.ENSRNOP00000025787	10116.ENSRNOP00000001012	0	0	0	0	0.627	0.831	0.9	0.624	0.997
Rps13	Rpl10a	5049430	5037475	10116.ENSRNOP00000036690	10116.ENSRNOP00000000603	0	0	0	0	0.594	0.917	0.9	0.299	0.997
Rps13	Rps27	5049430	5045301	10116.ENSRNOP00000036690	10116.ENSRNOP00000022897	0	0	0	0	0.625	0.919	0.9	0.402	0.997
Rps14	Rps2	5054455	5044035	10116.ENSRNOP00000056260	10116.ENSRNOP00000019508	0.068	0	0	0	0.505	0.901	0.9	0.559	0.997
Fcf1	Utp3	5039380	5038847	10116.ENSRNOP00000006297	10116.ENSRNOP00000004787	0	0	0	0	0.598	0.857	0.9	0.6	0.997
Rpl36	Rpl23	5055066	5039094	10116.ENSRNOP00000058934	10116.ENSRNOP00000005471	0	0	0	0	0.522	0.913	0.9	0.195	0.996
Insr	Igf1r	5055460	5043960	10116.ENSRNOP00000060141	10116.ENSRNOP00000019267	0	0	0	0.955	0.063	0.982	0.8	0.854	0.996
Wdr12	Pes1	5045528	5039275	10116.ENSRNOP00000023463	10116.ENSRNOP00000005996	0	0	0	0	0.686	0.774	0.9	0.525	0.996
Rpl23	Rpl10a	5039094	5037475	10116.ENSRNOP00000005471	10116.ENSRNOP00000000603	0.083	0	0	0	0.601	0.917	0.9	0.13	0.996
Rps10	Rps13	5055923	5049430	10116.ENSRNOP00000061642	10116.ENSRNOP00000036690	0	0	0	0	0.498	0.903	0.9	0.372	0.996
Rps23	Rps2	5045083	5044035	10116.ENSRNOP00000022348	10116.ENSRNOP00000019508	0.068	0	0	0	0.433	0.891	0.9	0.541	0.996
Rps12	Rplp1	5045022	5042729	10116.ENSRNOP00000022184	10116.ENSRNOP00000015893	0	0	0	0	0.904	0.612	0.9	0.26	0.996
Etf1	Rps23	5046645	5045083	10116.ENSRNOP00000026398	10116.ENSRNOP00000022348	0.085	0	0	0	0.175	0.957	0.9	0	0.996
Rps13	Rps12	5049430	5045022	10116.ENSRNOP00000036690	10116.ENSRNOP00000022184	0.044	0	0	0	0.581	0.907	0.9	0.243	0.996
Rps13	Etf1	5049430	5046645	10116.ENSRNOP00000036690	10116.ENSRNOP00000026398	0.044	0	0	0	0.373	0.95	0.9	0.095	0.996
Polr1b	Znrd1	5046051	5037588	10116.ENSRNOP00000024882	10116.ENSRNOP00000001012	0	0	0	0	0.5	0.831	0.9	0.52	0.995
Etf1	Rpl23	5046645	5039094	10116.ENSRNOP00000026398	10116.ENSRNOP00000005471	0	0	0	0	0.175	0.949	0.9	0	0.995
Rpl14	Uba52	5055953	5046917	10116.ENSRNOP00000061747	10116.ENSRNOP00000027073	0	0	0	0	0.701	0.837	0.9	0.214	0.995
Uqcrh	Cox6c	5043060	5042199	10116.ENSRNOP00000016751	10116.ENSRNOP00000014407	0	0	0	0	0.91	0	0.9	0.53	0.995
Coq7	Coq3	5045342	5041849	10116.ENSRNOP00000022988	10116.ENSRNOP00000013384	0.043	0	0	0	0.17	0.27	0.9	0.927	0.995
Etf1	Rpl10a	5046645	5037475	10116.ENSRNOP00000026398	10116.ENSRNOP00000000603	0.044	0	0	0	0.139	0.949	0.9	0.067	0.995
Sqle	Cyp51	5041669	5040616	10116.ENSRNOP00000012883	10116.ENSRNOP00000009985	0	0	0	0	0.941	0.164	0	0.911	0.995
mrpl11	Mrpl44	5046924	5044353	10116.ENSRNOP00000027091	10116.ENSRNOP00000020420	0	0	0	0	0.181	0.809	0.9	0.722	0.995
Rps15	Uba52	5049079	5046917	10116.ENSRNOP00000035156	10116.ENSRNOP00000027073	0	0	0	0	0.886	0.956	0	0.241	0.995
Rps15	Rps2	5049079	5044035	10116.ENSRNOP00000035156	10116.ENSRNOP00000019508	0.072	0	0	0	0.49	0.891	0.9	0.333	0.995
Mrps22	Mrps26	5059274	5047623	10116.ENSRNOP00000067192	10116.ENSRNOP00000028828	0	0	0	0	0.122	0.902	0.9	0.521	0.995
Rps12	Rpl23	5045022	5039094	10116.ENSRNOP00000022184	10116.ENSRNOP00000005471	0.044	0	0	0	0.591	0.906	0.9	0.056	0.995
Pxn	Crk	5051310	5039427	10116.ENSRNOP00000043928	10116.ENSRNOP00000006407	0	0	0	0	0.045	0.772	0.9	0.803	0.995
Gpaa1	Pigu	5052957	5048590	10116.ENSRNOP00000050220	10116.ENSRNOP00000032963	0	0	0	0	0.118	0.861	0.9	0.667	0.995
Rpl14	Rps23	5055953	5045083	10116.ENSRNOP00000061747	10116.ENSRNOP00000022348	0.06	0	0	0	0.668	0.62	0.9	0.574	0.994
Uqcrq	Cox6c	5057601	5042199	10116.ENSRNOP00000065074	10116.ENSRNOP00000014407	0	0	0	0	0.936	0.766	0.54	0.345	0.994
Rps13	Rpl19	5049430	5039407	10116.ENSRNOP00000036690	10116.ENSRNOP00000006359	0	0	0	0	0.516	0.885	0.9	0.177	0.994
Uba52	Rps23	5046917	5045083	10116.ENSRNOP00000027073	10116.ENSRNOP00000022348	0	0	0	0	0.854	0.957	0	0.258	0.994
mrpl11	Mrpl2	5046924	5045874	10116.ENSRNOP00000027091	10116.ENSRNOP00000024380	0.079	0	0	0	0.464	0.901	0.9	0.113	0.994
Nox1	Ncf1	5058322	5037960	10116.ENSRNOP00000065995	10116.ENSRNOP00000002028	0	0	0	0	0.122	0.109	0.9	0.935	0.994
Rps24	Rps27	5055202	5045301	10116.ENSRNOP00000059382	10116.ENSRNOP00000022897	0	0	0	0	0.653	0.653	0.9	0.581	0.994
Rpl19	Rpl23	5039407	5039094	10116.ENSRNOP00000006359	10116.ENSRNOP00000005471	0.068	0	0	0	0.518	0.885	0.9	0.082	0.994
Rpl36	Rpl19	5055066	5039407	10116.ENSRNOP00000058934	10116.ENSRNOP00000006359	0	0	0	0	0.482	0.88	0.9	0.224	0.994
Rps27	Rpl19	5045301	5039407	10116.ENSRNOP00000022897	10116.ENSRNOP00000006359	0	0	0	0	0.906	0.898	0	0.461	0.994
Rps24	Rps14	5055202	5054455	10116.ENSRNOP00000059382	10116.ENSRNOP00000056260	0	0	0	0	0.595	0.611	0.9	0.716	0.994
Utp14a	Utp3	5053352	5038847	10116.ENSRNOP00000051553	10116.ENSRNOP00000004787	0	0	0	0	0.66	0.776	0.9	0.411	0.994
Rps24	Rps25	5055202	5048636	10116.ENSRNOP00000059382	10116.ENSRNOP00000033144	0	0	0	0	0.566	0.611	0.9	0.696	0.994
Uba52	Rps3	5046917	5045692	10116.ENSRNOP00000027073	10116.ENSRNOP00000023935	0	0	0	0	0.867	0.957	0	0.174	0.994
Rpl36	Rps12	5055066	5045022	10116.ENSRNOP00000058934	10116.ENSRNOP00000022184	0	0	0	0	0.508	0.893	0.9	0.075	0.994
Dlg4	Grin1	5055096	5047721	10116.ENSRNOP00000059045	10116.ENSRNOP00000029227	0	0	0	0	0.223	0.551	0.9	0.855	0.994
Rps14	Uba52	5054455	5046917	10116.ENSRNOP00000056260	10116.ENSRNOP00000027073	0	0	0	0	0.738	0.965	0	0.287	0.993
Etf1	Rps12	5046645	5045022	10116.ENSRNOP00000026398	10116.ENSRNOP00000022184	0	0	0	0	0.136	0.925	0.9	0	0.993
Rps24	Rps13	5055202	5049430	10116.ENSRNOP00000059382	10116.ENSRNOP00000036690	0.082	0	0	0	0.635	0.635	0.9	0.558	0.993
Rps24	Rps15	5055202	5049079	10116.ENSRNOP00000059382	10116.ENSRNOP00000035156	0	0	0	0	0.588	0.624	0.9	0.638	0.993
Rps24	Rps23	5055202	5045083	10116.ENSRNOP00000059382	10116.ENSRNOP00000022348	0	0	0	0	0.633	0.652	0.9	0.529	0.993
Rpl36a	Rps27	5052640	5045301	10116.ENSRNOP00000049014	10116.ENSRNOP00000022897	0.076	0	0	0	0.895	0.917	0	0.321	0.993
Cdkn1b	Cdk4	5052947	5048988	10116.ENSRNOP00000050173	10116.ENSRNOP00000034754	0	0	0	0	0.05	0.654	0.9	0.815	0.993
Rps10	Uba52	5055923	5046917	10116.ENSRNOP00000061642	10116.ENSRNOP00000027073	0	0	0	0	0.899	0.924	0	0.191	0.993
Rps4x	Rps14	5059880	5054455	10116.ENSRNOP00000067969	10116.ENSRNOP00000056260	0	0	0.213	0	0.582	0.92	0.54	0.505	0.993
Rpl36a	Rps25	5052640	5048636	10116.ENSRNOP00000049014	10116.ENSRNOP00000033144	0	0	0	0	0.91	0.89	0	0.357	0.993
LOC679683	Rps23	5053664	5045083	10116.ENSRNOP00000052873	10116.ENSRNOP00000022348	0.085	0	0	0	0.553	0.8	0.9	0.248	0.992
Rxra	Ncoa2	5041671	5041011	10116.ENSRNOP00000012892	10116.ENSRNOP00000011026	0	0	0	0	0.063	0.877	0.9	0.392	0.992
Dlg4	Dlgap3	5055096	5043945	10116.ENSRNOP00000059045	10116.ENSRNOP00000019214	0	0	0	0	0.222	0.696	0.9	0.703	0.992
LOC679683	Rpl23	5053664	5039094	10116.ENSRNOP00000052873	10116.ENSRNOP00000005471	0.085	0	0.255	0	0.553	0.764	0.9	0.174	0.992
Rpl3	Uba52	5055630	5046917	10116.ENSRNOP00000060662	10116.ENSRNOP00000027073	0	0	0	0	0.632	0.758	0.9	0.228	0.992
Rpl3	Rpl10a	5055630	5037475	10116.ENSRNOP00000060662	10116.ENSRNOP00000000603	0.083	0	0	0	0.687	0.613	0.9	0.438	0.992
Tceb1	Vhl	5059457	5041958	10116.ENSRNOP00000067410	10116.ENSRNOP00000013727	0	0	0	0	0	0.638	0.9	0.811	0.992
Cdk4	Cdkn2c	5048988	5041383	10116.ENSRNOP00000034754	10116.ENSRNOP00000012088	0	0	0	0	0.063	0.829	0.9	0.577	0.992
Ube2f	Dcun1d3	5046905	5043926	10116.ENSRNOP00000027050	10116.ENSRNOP00000019167	0	0	0	0	0.063	0.9	0.9	0.288	0.992
Rps4x	Rps27	5059880	5045301	10116.ENSRNOP00000067969	10116.ENSRNOP00000022897	0	0	0	0	0.599	0.92	0.54	0.552	0.992
Etf1	Rpl19	5046645	5039407	10116.ENSRNOP00000026398	10116.ENSRNOP00000006359	0	0	0	0	0.16	0.918	0.9	0	0.992
Rpl36a	Rps23	5052640	5045083	10116.ENSRNOP00000049014	10116.ENSRNOP00000022348	0	0	0	0	0.87	0.912	0	0.386	0.992
Rps10	Rps24	5055923	5055202	10116.ENSRNOP00000061642	10116.ENSRNOP00000059382	0	0	0	0	0.44	0.592	0.9	0.698	0.992
LOC679683	Etf1	5053664	5046645	10116.ENSRNOP00000052873	10116.ENSRNOP00000026398	0	0	0	0	0.176	0.917	0.9	0	0.992
Shank1	Dlgap3	5046515	5043945	10116.ENSRNOP00000026100	10116.ENSRNOP00000019214	0	0	0	0	0.225	0.776	0.9	0.629	0.992
Cox4i1	Cox6c	5045724	5042199	10116.ENSRNOP00000024033	10116.ENSRNOP00000014407	0	0	0	0	0.703	0.802	0.54	0.711	0.991
Rpl3	Rps23	5055630	5045083	10116.ENSRNOP00000060662	10116.ENSRNOP00000022348	0.085	0	0	0	0.61	0.62	0.9	0.457	0.991
Utp14a	Fcf1	5053352	5039380	10116.ENSRNOP00000051553	10116.ENSRNOP00000006297	0	0	0	0	0.527	0.745	0.9	0.396	0.991
Rps19	Rps15	5058962	5049079	10116.ENSRNOP00000066808	10116.ENSRNOP00000035156	0	0	0	0	0.897	0.548	0.54	0.65	0.991
Eprs	Dars	5048672	5038974	10116.ENSRNOP00000033323	10116.ENSRNOP00000005127	0.108	0	0	0	0.689	0.892	0	0.739	0.991
Rps4x	Rps23	5059880	5045083	10116.ENSRNOP00000067969	10116.ENSRNOP00000022348	0	0	0	0	0.584	0.919	0.54	0.519	0.991
Cs	Dlat	5049027	5048573	10116.ENSRNOP00000034921	10116.ENSRNOP00000032890	0.107	0	0	0	0.411	0.652	0.9	0.606	0.991
Rpl14	Etf1	5055953	5046645	10116.ENSRNOP00000061747	10116.ENSRNOP00000026398	0	0	0	0	0.527	0.835	0.9	0	0.991
Rps24	Rps3	5055202	5045692	10116.ENSRNOP00000059382	10116.ENSRNOP00000023935	0	0	0	0	0.622	0.652	0.9	0.402	0.991
Rps27	Rplp1	5045301	5042729	10116.ENSRNOP00000022897	10116.ENSRNOP00000015893	0	0	0	0	0.937	0.742	0	0.463	0.99
Rpl14	Rps13	5055953	5049430	10116.ENSRNOP00000061747	10116.ENSRNOP00000036690	0	0	0	0	0.621	0.615	0.9	0.397	0.99
Rpl3	Rpl19	5055630	5039407	10116.ENSRNOP00000060662	10116.ENSRNOP00000006359	0.068	0	0.205	0	0.62	0.505	0.9	0.439	0.99
Rpl36a	Rps15	5052640	5049079	10116.ENSRNOP00000049014	10116.ENSRNOP00000035156	0	0	0	0	0.793	0.912	0	0.527	0.99
Hmgcs1	Cyp51	5045561	5040616	10116.ENSRNOP00000023554	10116.ENSRNOP00000009985	0.052	0	0	0	0.944	0.068	0	0.826	0.99
LOC679683	Rps13	5053664	5049430	10116.ENSRNOP00000052873	10116.ENSRNOP00000036690	0	0	0	0	0.547	0.765	0.9	0.226	0.99
Rps4x	Rps15	5059880	5049079	10116.ENSRNOP00000067969	10116.ENSRNOP00000035156	0.088	0	0	0	0.571	0.919	0.54	0.435	0.99
LOC684988	Rps27	5047210	5045301	10116.ENSRNOP00000027803	10116.ENSRNOP00000022897	0	0	0	0	0.717	0.919	0	0.608	0.99
Rps3	Rps2	5045692	5044035	10116.ENSRNOP00000023935	10116.ENSRNOP00000019508	0.072	0	0	0	0.493	0.48	0.9	0.669	0.99
Rps19	Rps27	5058962	5045301	10116.ENSRNOP00000066808	10116.ENSRNOP00000022897	0.059	0	0	0	0.901	0.587	0.54	0.54	0.99
Mrps22	mrpl11	5059274	5046924	10116.ENSRNOP00000067192	10116.ENSRNOP00000027091	0	0	0	0	0.123	0.793	0.9	0.529	0.99
Rpl3	Rplp1	5055630	5042729	10116.ENSRNOP00000060662	10116.ENSRNOP00000015893	0	0	0	0	0.625	0.707	0.9	0.256	0.99
Gtf2h2	Polr2g	5054827	5046605	10116.ENSRNOP00000057895	10116.ENSRNOP00000026313	0	0	0	0	0.083	0.819	0.9	0.481	0.99
LOC679683	Rpl10a	5053664	5037475	10116.ENSRNOP00000052873	10116.ENSRNOP00000000603	0.083	0	0	0	0.551	0.759	0.9	0.177	0.99
Hmgcs1	Sqle	5045561	5041669	10116.ENSRNOP00000023554	10116.ENSRNOP00000012883	0	0	0	0	0.938	0	0	0.858	0.99
Rpl36a	Rps3	5052640	5045692	10116.ENSRNOP00000049014	10116.ENSRNOP00000023935	0	0	0	0	0.828	0.912	0	0.367	0.989
Rps4x	Rps12	5059880	5045022	10116.ENSRNOP00000067969	10116.ENSRNOP00000022184	0	0	0	0	0.559	0.912	0.54	0.479	0.989
Dlg4	Shank1	5055096	5046515	10116.ENSRNOP00000059045	10116.ENSRNOP00000026100	0	0	0	0	0.226	0.537	0.9	0.728	0.989
Rpl14	Rpl3	5055953	5055630	10116.ENSRNOP00000061747	10116.ENSRNOP00000060662	0.069	0	0	0	0.585	0.624	0.9	0.359	0.989
Rpl36	Rplp1	5055066	5042729	10116.ENSRNOP00000058934	10116.ENSRNOP00000015893	0	0	0	0	0.544	0.617	0.9	0.476	0.989
Dlg4	Nlgn2	5055096	5053871	10116.ENSRNOP00000059045	10116.ENSRNOP00000053713	0	0	0	0	0.221	0.367	0.9	0.815	0.989
Rps4x	Rps3	5059880	5045692	10116.ENSRNOP00000067969	10116.ENSRNOP00000023935	0.088	0	0	0	0.6	0.919	0.54	0.35	0.989
Csnk1e	Clock	5043569	5038261	10116.ENSRNOP00000018126	10116.ENSRNOP00000002976	0	0	0	0	0	0.911	0.6	0.726	0.989
Rps24	Rps12	5055202	5045022	10116.ENSRNOP00000059382	10116.ENSRNOP00000022184	0	0	0	0	0.623	0.611	0.9	0.386	0.989
Rps19	Rps3	5058962	5045692	10116.ENSRNOP00000066808	10116.ENSRNOP00000023935	0	0	0	0	0.902	0.547	0.54	0.565	0.989
Rps3	Rpl19	5045692	5039407	10116.ENSRNOP00000023935	10116.ENSRNOP00000006359	0.072	0	0	0	0.853	0.89	0	0.314	0.988
Mrpl2	Mrpl44	5045874	5044353	10116.ENSRNOP00000024380	10116.ENSRNOP00000020420	0	0	0	0	0.221	0.843	0.9	0.174	0.988
Rps25	Uba52	5048636	5046917	10116.ENSRNOP00000033144	10116.ENSRNOP00000027073	0	0	0	0	0.71	0.927	0	0.497	0.988
Rps14	Rpl10a	5054455	5037475	10116.ENSRNOP00000056260	10116.ENSRNOP00000000603	0.083	0	0	0	0.75	0.919	0	0.455	0.988
Rpl14	Rplp1	5055953	5042729	10116.ENSRNOP00000061747	10116.ENSRNOP00000015893	0	0	0	0	0.567	0.647	0.9	0.352	0.988
Rpl14	Rps12	5055953	5045022	10116.ENSRNOP00000061747	10116.ENSRNOP00000022184	0	0	0	0	0.668	0.6	0.9	0.263	0.988
Rps15	Rpl10a	5049079	5037475	10116.ENSRNOP00000035156	10116.ENSRNOP00000000603	0.084	0	0	0	0.845	0.918	0	0.139	0.988
Rps13	Uba52	5049430	5046917	10116.ENSRNOP00000036690	10116.ENSRNOP00000027073	0	0	0	0	0.61	0.95	0	0.426	0.987
Rpl14	Rpl10a	5055953	5037475	10116.ENSRNOP00000061747	10116.ENSRNOP00000000603	0	0	0	0	0.676	0.615	0.9	0.094	0.987
Cct2	Cct6a	5047722	5037664	10116.ENSRNOP00000029234	10116.ENSRNOP00000001227	0	0	0.287	0.731	0.605	0.625	0.9	0.69	0.987
Cyp51	Dhcr24	5040616	5040408	10116.ENSRNOP00000009985	10116.ENSRNOP00000009402	0	0	0	0	0.629	0	0.9	0.684	0.987
Rplp1	Rpl10a	5042729	5037475	10116.ENSRNOP00000015893	10116.ENSRNOP00000000603	0.081	0	0	0	0.605	0.638	0.9	0.206	0.987
Rpl14	LOC679683	5055953	5053664	10116.ENSRNOP00000061747	10116.ENSRNOP00000052873	0.069	0	0	0	0.558	0.645	0.9	0.278	0.987
Rps4x	Rpl36a	5059880	5052640	10116.ENSRNOP00000067969	10116.ENSRNOP00000049014	0	0	0	0	0.535	0.912	0	0.721	0.987
Rps4x	Rps25	5059880	5048636	10116.ENSRNOP00000067969	10116.ENSRNOP00000033144	0	0	0	0	0.543	0.914	0.54	0.382	0.987
Rps4x	Rps10	5059880	5055923	10116.ENSRNOP00000067969	10116.ENSRNOP00000061642	0	0	0	0	0.49	0.907	0.54	0.461	0.986
Rpl14	Rpl36	5055953	5055066	10116.ENSRNOP00000061747	10116.ENSRNOP00000058934	0	0	0	0	0.559	0.603	0.9	0.343	0.986
Rpl3	Rps13	5055630	5049430	10116.ENSRNOP00000060662	10116.ENSRNOP00000036690	0	0	0	0	0.568	0.615	0.9	0.272	0.986
Rxra	Thrb	5041671	5040175	10116.ENSRNOP00000012892	10116.ENSRNOP00000008752	0	0	0	0.664	0	0.917	0.8	0.647	0.986
Rps29	Uba52	5050429	5046917	10116.ENSRNOP00000040703	10116.ENSRNOP00000027073	0	0	0	0	0.61	0.957	0	0.258	0.986
Rpl3	LOC679683	5055630	5053664	10116.ENSRNOP00000060662	10116.ENSRNOP00000052873	0.085	0	0	0	0.57	0.64	0.9	0.174	0.986
Rps4x	Uba52	5059880	5046917	10116.ENSRNOP00000067969	10116.ENSRNOP00000027073	0	0	0	0	0.625	0.957	0	0.239	0.986
Rpl3	Rpl23	5055630	5039094	10116.ENSRNOP00000060662	10116.ENSRNOP00000005471	0.085	0	0	0	0.574	0.615	0.9	0.214	0.986
Rpl36a	Uba52	5052640	5046917	10116.ENSRNOP00000049014	10116.ENSRNOP00000027073	0	0	0	0	0.767	0.925	0	0.262	0.986
Rps14	Rps29	5054455	5050429	10116.ENSRNOP00000056260	10116.ENSRNOP00000040703	0.084	0	0	0	0.549	0.92	0	0.596	0.985
Rps27	Rps2	5045301	5044035	10116.ENSRNOP00000022897	10116.ENSRNOP00000019508	0	0	0	0	0.432	0.519	0.9	0.546	0.985
Rplp1	Rpl23	5042729	5039094	10116.ENSRNOP00000015893	10116.ENSRNOP00000005471	0	0	0	0	0.562	0.638	0.9	0.2	0.985
Ndufs5	Uqcrh	5049650	5043060	10116.ENSRNOP00000037699	10116.ENSRNOP00000016751	0	0	0	0	0.915	0.62	0	0.596	0.985
Rps4x	Rps13	5059880	5049430	10116.ENSRNOP00000067969	10116.ENSRNOP00000036690	0	0	0	0	0.582	0.918	0.54	0.205	0.985
Mrps22	Mrpl44	5059274	5044353	10116.ENSRNOP00000067192	10116.ENSRNOP00000020420	0	0	0	0	0.145	0.793	0.9	0.259	0.985
Mrps26	mrpl11	5047623	5046924	10116.ENSRNOP00000028828	10116.ENSRNOP00000027091	0	0	0	0	0.152	0.844	0.9	0	0.985
Rpl3	Rpl36	5055630	5055066	10116.ENSRNOP00000060662	10116.ENSRNOP00000058934	0	0	0	0	0.553	0.608	0.9	0.271	0.985
Rpl14	Rpl23	5055953	5039094	10116.ENSRNOP00000061747	10116.ENSRNOP00000005471	0.069	0	0	0	0.623	0.615	0.9	0.095	0.985
Rps29	Rps27	5050429	5045301	10116.ENSRNOP00000040703	10116.ENSRNOP00000022897	0	0	0	0	0.54	0.92	0	0.639	0.985
Rps24	Rps2	5055202	5044035	10116.ENSRNOP00000059382	10116.ENSRNOP00000019508	0	0	0	0	0.376	0.558	0.9	0.526	0.985
Nrxn2	Nlgn2	5056551	5053871	10116.ENSRNOP00000063600	10116.ENSRNOP00000053713	0	0	0	0	0.175	0.492	0.8	0.842	0.985
Rps27	Rpl23	5045301	5039094	10116.ENSRNOP00000022897	10116.ENSRNOP00000005471	0	0	0	0	0.631	0.919	0	0.536	0.985
Rps29	Rps15	5050429	5049079	10116.ENSRNOP00000040703	10116.ENSRNOP00000035156	0.085	0	0	0	0.549	0.919	0	0.608	0.985
Rps15	LOC684988	5049079	5047210	10116.ENSRNOP00000035156	10116.ENSRNOP00000027803	0	0	0	0	0.558	0.918	0	0.617	0.985
Rps10	Rps2	5055923	5044035	10116.ENSRNOP00000061642	10116.ENSRNOP00000019508	0	0	0	0	0.381	0.42	0.9	0.643	0.985
Rps14	LOC684988	5054455	5047210	10116.ENSRNOP00000056260	10116.ENSRNOP00000027803	0	0	0	0	0.565	0.919	0	0.595	0.984
Uba52	Etf1	5046917	5046645	10116.ENSRNOP00000027073	10116.ENSRNOP00000026398	0	0	0	0	0.118	0.982	0	0	0.984
Polr2g	Tcea1	5046605	5040961	10116.ENSRNOP00000026313	10116.ENSRNOP00000010893	0	0	0	0	0.075	0.753	0.9	0.389	0.984
Vhl	Tceb2	5041958	5039605	10116.ENSRNOP00000013727	10116.ENSRNOP00000006892	0	0	0	0	0	0.442	0.9	0.743	0.984
Rpl35a	Uba52	5054353	5046917	10116.ENSRNOP00000055825	10116.ENSRNOP00000027073	0	0	0	0	0.555	0.924	0.54	0.11	0.984
LOC684988	Rps3	5047210	5045692	10116.ENSRNOP00000027803	10116.ENSRNOP00000023935	0	0	0	0	0.578	0.918	0	0.573	0.984
Ntrk2	Shc1	5051759	5047304	10116.ENSRNOP00000045635	10116.ENSRNOP00000028038	0	0	0	0	0.063	0.609	0.9	0.622	0.984
Rps19	Rplp1	5058962	5042729	10116.ENSRNOP00000066808	10116.ENSRNOP00000015893	0.067	0	0	0	0.929	0.606	0	0.477	0.984
Kcnip3	Kcnd3	5052360	5044214	10116.ENSRNOP00000047927	10116.ENSRNOP00000019997	0	0	0	0	0.098	0.446	0.9	0.718	0.984
LOC684988	Rps23	5047210	5045083	10116.ENSRNOP00000027803	10116.ENSRNOP00000022348	0	0	0	0	0.713	0.918	0	0.384	0.984
LOC684988	Rpl10a	5047210	5037475	10116.ENSRNOP00000027803	10116.ENSRNOP00000000603	0	0	0	0	0.744	0.917	0	0.294	0.983
Tceb1	Cul5	5059457	5040982	10116.ENSRNOP00000067410	10116.ENSRNOP00000010956	0	0	0	0	0.063	0.858	0	0.884	0.983
Homer1	Shank1	5058316	5046515	10116.ENSRNOP00000065989	10116.ENSRNOP00000026100	0	0	0	0	0	0.478	0.9	0.705	0.983
Rpl36a	Rps12	5052640	5045022	10116.ENSRNOP00000049014	10116.ENSRNOP00000022184	0	0	0	0	0.8	0.887	0	0.286	0.982
Rps27	Rpl10a	5045301	5037475	10116.ENSRNOP00000022897	10116.ENSRNOP00000000603	0	0	0	0	0.716	0.919	0	0.278	0.982
Rpl3	Etf1	5055630	5046645	10116.ENSRNOP00000060662	10116.ENSRNOP00000026398	0	0	0	0	0.456	0.603	0.9	0.282	0.982
P4hb	Ppib	5053439	5045274	10116.ENSRNOP00000051841	10116.ENSRNOP00000022828	0	0	0	0	0.328	0.402	0.9	0.61	0.982
Rps25	Rpl10a	5048636	5037475	10116.ENSRNOP00000033144	10116.ENSRNOP00000000603	0	0	0	0	0.752	0.907	0	0.307	0.982
LOC679683	Rps12	5053664	5045022	10116.ENSRNOP00000052873	10116.ENSRNOP00000022184	0.044	0	0	0	0.534	0.647	0.9	0.057	0.982
Rps3	Rpl10a	5045692	5037475	10116.ENSRNOP00000023935	10116.ENSRNOP00000000603	0.084	0	0	0	0.93	0.607	0	0.398	0.982
Rpl36	Rps14	5055066	5054455	10116.ENSRNOP00000058934	10116.ENSRNOP00000056260	0	0	0	0	0.566	0.918	0	0.537	0.982
Rpl3	Rps12	5055630	5045022	10116.ENSRNOP00000060662	10116.ENSRNOP00000022184	0.045	0	0	0	0.588	0.601	0.9	0.076	0.982
Ikbkg	Sharpin	5053730	5043540	10116.ENSRNOP00000053114	10116.ENSRNOP00000018032	0	0	0	0	0.063	0.629	0.9	0.549	0.982
LOC684988	Uba52	5047210	5046917	10116.ENSRNOP00000027803	10116.ENSRNOP00000027073	0	0	0	0	0.632	0.95	0	0.095	0.981
Mrps26	Mrpl2	5047623	5045874	10116.ENSRNOP00000028828	10116.ENSRNOP00000024380	0	0	0	0	0.175	0.793	0.9	0	0.981
Rps10	Rpl36a	5055923	5052640	10116.ENSRNOP00000061642	10116.ENSRNOP00000049014	0	0	0	0	0.764	0.885	0	0.376	0.981
Homer1	Shank3	5058316	5050529	10116.ENSRNOP00000065989	10116.ENSRNOP00000041083	0	0	0	0	0	0.485	0.9	0.662	0.981
Shank3	Dlgap3	5050529	5043945	10116.ENSRNOP00000041083	10116.ENSRNOP00000019214	0	0	0	0	0.064	0.938	0	0.7	0.981
Rps14	Rpl35a	5054455	5054353	10116.ENSRNOP00000056260	10116.ENSRNOP00000055825	0	0	0	0	0.527	0.915	0	0.563	0.981
Rpl14	Rpl19	5055953	5039407	10116.ENSRNOP00000061747	10116.ENSRNOP00000006359	0.044	0	0	0	0.591	0.48	0.9	0.205	0.98
Cox7a2	Uqcrh	5055543	5043060	10116.ENSRNOP00000060398	10116.ENSRNOP00000016751	0	0	0	0	0.943	0.315	0	0.54	0.98
Atp6v0d1	Atp6v1g2	5045578	5037624	10116.ENSRNOP00000023606	10116.ENSRNOP00000001114	0	0	0	0	0.297	0.619	0.9	0.371	0.98
Shc1	Erbb4	5047304	5043965	10116.ENSRNOP00000028038	10116.ENSRNOP00000019283	0	0	0	0	0	0.61	0.9	0.541	0.98
Mrps22	Mrpl2	5059274	5045874	10116.ENSRNOP00000067192	10116.ENSRNOP00000024380	0	0	0	0	0.146	0.793	0.9	0	0.98
Rps14	Rpl19	5054455	5039407	10116.ENSRNOP00000056260	10116.ENSRNOP00000006359	0	0	0	0	0.64	0.898	0	0.498	0.98
LOC679683	Rpl19	5053664	5039407	10116.ENSRNOP00000052873	10116.ENSRNOP00000006359	0	0	0	0	0.469	0.612	0.9	0.172	0.98
Rps29	LOC684988	5050429	5047210	10116.ENSRNOP00000040703	10116.ENSRNOP00000027803	0	0	0	0	0.533	0.918	0	0.529	0.98
Rps14	Rpl23	5054455	5039094	10116.ENSRNOP00000056260	10116.ENSRNOP00000005471	0.085	0	0.275	0	0.623	0.919	0	0.174	0.98
Rpl36a	Rpl10a	5052640	5037475	10116.ENSRNOP00000049014	10116.ENSRNOP00000000603	0	0	0	0	0.741	0.907	0	0.215	0.979
Rab5b	Rab11a	5054982	5042618	10116.ENSRNOP00000058595	10116.ENSRNOP00000015598	0	0	0.447	0.882	0.064	0.766	0.9	0.68	0.979
Rps29	Rps25	5050429	5048636	10116.ENSRNOP00000040703	10116.ENSRNOP00000033144	0	0	0	0	0.501	0.915	0	0.553	0.979
Eif4e	Ncbp1	5056576	5049893	10116.ENSRNOP00000063699	10116.ENSRNOP00000038713	0	0	0	0	0.166	0.61	0.72	0.805	0.979
Polr2g	Tbp	5046605	5037965	10116.ENSRNOP00000026313	10116.ENSRNOP00000002038	0	0	0	0	0.082	0.653	0.9	0.42	0.979
Taf9b	Tbp	5059950	5037965	10116.ENSRNOP00000068201	10116.ENSRNOP00000002038	0	0	0	0	0.076	0.653	0.9	0.431	0.979
Rps19	Rps12	5058962	5045022	10116.ENSRNOP00000066808	10116.ENSRNOP00000022184	0	0	0	0	0.853	0.448	0.54	0.512	0.979
Rps29	Rps13	5050429	5049430	10116.ENSRNOP00000040703	10116.ENSRNOP00000036690	0	0	0	0	0.533	0.918	0	0.507	0.979
Rps4x	Etf1	5059880	5046645	10116.ENSRNOP00000067969	10116.ENSRNOP00000026398	0	0	0	0	0.534	0.957	0	0	0.979
Eci2	Eci1	5044967	5041279	10116.ENSRNOP00000022022	10116.ENSRNOP00000011784	0	0	0	0	0.537	0.069	0.8	0.786	0.979
Ddx39a	Chtop	5050417	5040799	10116.ENSRNOP00000040666	10116.ENSRNOP00000010455	0	0	0	0	0.279	0.611	0.9	0.349	0.979
Fcgr3a	Tyrobp	5051103	5047405	10116.ENSRNOP00000043183	10116.ENSRNOP00000028284	0	0	0	0	0.705	0	0.9	0.354	0.979
Rps12	Rps2	5045022	5044035	10116.ENSRNOP00000022184	10116.ENSRNOP00000019508	0	0	0	0	0.405	0.421	0.9	0.477	0.979
Mrps26	Mrpl44	5047623	5044353	10116.ENSRNOP00000028828	10116.ENSRNOP00000020420	0	0	0	0	0.097	0.793	0.9	0	0.979
Dlg4	Map1a	5055096	5043978	10116.ENSRNOP00000059045	10116.ENSRNOP00000019320	0	0	0	0	0.205	0.957	0	0.443	0.979
Cacnb1	Cacna1e	5039308	5038563	10116.ENSRNOP00000006098	10116.ENSRNOP00000003928	0	0	0	0	0.112	0.557	0.9	0.511	0.978
Carm1	Ncoa2	5050984	5041011	10116.ENSRNOP00000042739	10116.ENSRNOP00000011026	0	0	0	0	0	0.42	0.9	0.66	0.978
Rps15	Rpl19	5049079	5039407	10116.ENSRNOP00000035156	10116.ENSRNOP00000006359	0.072	0	0	0	0.75	0.89	0	0.249	0.978
Rps19	Rps10	5058962	5055923	10116.ENSRNOP00000066808	10116.ENSRNOP00000061642	0	0	0	0	0.774	0.439	0.54	0.678	0.978
Rpl36	Rps15	5055066	5049079	10116.ENSRNOP00000058934	10116.ENSRNOP00000035156	0	0	0	0	0.592	0.916	0	0.401	0.977
Rps19	Rps14	5058962	5054455	10116.ENSRNOP00000066808	10116.ENSRNOP00000056260	0	0	0	0	0.578	0.586	0.54	0.747	0.977
Wdr12	Ftsj3	5045528	5041818	10116.ENSRNOP00000023463	10116.ENSRNOP00000013295	0	0	0	0	0.792	0.65	0.54	0.417	0.977
Rps19	Rps24	5058962	5055202	10116.ENSRNOP00000066808	10116.ENSRNOP00000059382	0	0	0	0	0.539	0.604	0.54	0.759	0.977
Uqcrq	Cox4i1	5057601	5045724	10116.ENSRNOP00000065074	10116.ENSRNOP00000024033	0	0	0	0	0.632	0.759	0.54	0.516	0.977
Rpl35a	Rpl23	5054353	5039094	10116.ENSRNOP00000055825	10116.ENSRNOP00000005471	0	0	0	0	0.482	0.903	0.54	0.11	0.976
Rps19	Rps23	5058962	5045083	10116.ENSRNOP00000066808	10116.ENSRNOP00000022348	0	0	0	0	0.762	0.548	0.54	0.583	0.976
Rpl36a	Rps29	5052640	5050429	10116.ENSRNOP00000049014	10116.ENSRNOP00000040703	0	0	0	0	0.516	0.912	0	0.486	0.976
LOC679683	Uba52	5053664	5046917	10116.ENSRNOP00000052873	10116.ENSRNOP00000027073	0	0	0	0	0.632	0.917	0	0.287	0.976
Rps29	Rps3	5050429	5045692	10116.ENSRNOP00000040703	10116.ENSRNOP00000023935	0.085	0	0	0	0.54	0.919	0	0.399	0.976
Rps25	LOC684988	5048636	5047210	10116.ENSRNOP00000033144	10116.ENSRNOP00000027803	0	0	0	0	0.545	0.907	0	0.476	0.976
Rps14	Rpl36a	5054455	5052640	10116.ENSRNOP00000056260	10116.ENSRNOP00000049014	0	0	0	0	0.575	0.917	0	0.374	0.976
LOC684988	Rps12	5047210	5045022	10116.ENSRNOP00000027803	10116.ENSRNOP00000022184	0.044	0	0	0	0.674	0.907	0	0.24	0.975
Psmc4	Uchl5	5046403	5038878	10116.ENSRNOP00000025819	10116.ENSRNOP00000004881	0	0	0	0	0.204	0.611	0.9	0.303	0.975
Rps13	Rps2	5049430	5044035	10116.ENSRNOP00000036690	10116.ENSRNOP00000019508	0	0	0	0	0.426	0.455	0.9	0.319	0.975
Rpl36	Rps29	5055066	5050429	10116.ENSRNOP00000058934	10116.ENSRNOP00000040703	0	0	0	0	0.531	0.916	0	0.417	0.975
Rpl35a	Rpl10a	5054353	5037475	10116.ENSRNOP00000055825	10116.ENSRNOP00000000603	0	0	0	0	0.471	0.903	0.54	0.068	0.975
Csnk1e	Cry2	5043569	5040680	10116.ENSRNOP00000018126	10116.ENSRNOP00000010142	0	0	0	0	0.064	0.612	0.8	0.689	0.974
Rps10	LOC684988	5055923	5047210	10116.ENSRNOP00000061642	10116.ENSRNOP00000027803	0	0	0	0	0.509	0.903	0	0.512	0.974
Cox7a2	Cox6c	5055543	5042199	10116.ENSRNOP00000060398	10116.ENSRNOP00000014407	0	0	0	0	0.88	0.552	0	0.561	0.974
Rps3	Rpl23	5045692	5039094	10116.ENSRNOP00000023935	10116.ENSRNOP00000005471	0.086	0	0	0	0.619	0.918	0	0.211	0.974
Ikbkg	Sumo1	5053730	5044974	10116.ENSRNOP00000053114	10116.ENSRNOP00000022048	0	0	0	0	0	0.469	0.9	0.534	0.973
Rps29	Rps23	5050429	5045083	10116.ENSRNOP00000040703	10116.ENSRNOP00000022348	0.084	0	0	0	0.54	0.919	0	0.303	0.973
Rpl36a	Rpl19	5052640	5039407	10116.ENSRNOP00000049014	10116.ENSRNOP00000006359	0	0	0	0	0.73	0.879	0	0.241	0.973
Dlat	Pdk2	5048573	5039153	10116.ENSRNOP00000032890	10116.ENSRNOP00000005641	0	0	0	0	0.081	0.497	0.9	0.488	0.973
Dlg2	Shank1	5053544	5046515	10116.ENSRNOP00000052268	10116.ENSRNOP00000026100	0	0	0	0	0.173	0.51	0.9	0.428	0.973
Rps15	Rpl23	5049079	5039094	10116.ENSRNOP00000035156	10116.ENSRNOP00000005471	0.086	0	0	0	0.596	0.918	0	0.223	0.973
Gorasp1	Golga2	5045883	5042903	10116.ENSRNOP00000024408	10116.ENSRNOP00000016341	0	0	0	0	0.063	0.793	0	0.873	0.973
Rpl36	Rps13	5055066	5049430	10116.ENSRNOP00000058934	10116.ENSRNOP00000036690	0	0	0	0	0.527	0.913	0	0.371	0.972
Rps25	Rps2	5048636	5044035	10116.ENSRNOP00000033144	10116.ENSRNOP00000019508	0	0	0	0	0.376	0.422	0.9	0.325	0.972
Rab14	Rab2a	5046342	5040110	10116.ENSRNOP00000025649	10116.ENSRNOP00000008522	0	0	0.442	0.953	0.348	0.588	0.9	0.69	0.972
Rps10	Rpl35a	5055923	5054353	10116.ENSRNOP00000061642	10116.ENSRNOP00000055825	0	0	0	0	0.377	0.885	0	0.642	0.972
Shank1	Sharpin	5046515	5043540	10116.ENSRNOP00000026100	10116.ENSRNOP00000018032	0	0	0	0	0.063	0.487	0.9	0.499	0.972
Rps4x	Rps29	5059880	5050429	10116.ENSRNOP00000067969	10116.ENSRNOP00000040703	0.085	0	0	0	0.547	0.919	0	0.254	0.971
Shank2	Dlgap3	5058013	5043945	10116.ENSRNOP00000065594	10116.ENSRNOP00000019214	0	0	0	0	0	0.453	0.9	0.529	0.971
Cdkn1b	Cdkn2c	5052947	5041383	10116.ENSRNOP00000050173	10116.ENSRNOP00000012088	0	0	0	0	0	0	0.9	0.727	0.971
Etf1	Rps3	5046645	5045692	10116.ENSRNOP00000026398	10116.ENSRNOP00000023935	0	0	0	0	0.369	0.956	0	0	0.971
Rps10	Rps29	5055923	5050429	10116.ENSRNOP00000061642	10116.ENSRNOP00000040703	0	0	0	0	0.472	0.907	0	0.462	0.971
Vti1a	M6pr	5055075	5044329	10116.ENSRNOP00000058953	10116.ENSRNOP00000020364	0	0	0	0	0	0	0.9	0.727	0.971
Gtf2h2	Tbp	5054827	5037965	10116.ENSRNOP00000057895	10116.ENSRNOP00000002038	0	0	0	0	0.067	0.652	0.9	0.225	0.971
Rps10	Rpl36	5055923	5055066	10116.ENSRNOP00000061642	10116.ENSRNOP00000058934	0	0	0	0	0.463	0.891	0	0.537	0.97
Rps25	Rpl19	5048636	5039407	10116.ENSRNOP00000033144	10116.ENSRNOP00000006359	0	0	0	0	0.612	0.879	0	0.411	0.97
Rpl36	LOC684988	5055066	5047210	10116.ENSRNOP00000058934	10116.ENSRNOP00000027803	0	0	0	0	0.504	0.913	0	0.369	0.97
Rpl9	Rps3	5048515	5045692	10116.ENSRNOP00000032635	10116.ENSRNOP00000023935	0.074	0	0	0	0.915	0.476	0	0.368	0.97
Vti1a	Vps52	5055075	5037456	10116.ENSRNOP00000058953	10116.ENSRNOP00000000549	0	0	0	0	0.077	0	0.9	0.705	0.97
Rps14	Etf1	5054455	5046645	10116.ENSRNOP00000056260	10116.ENSRNOP00000026398	0	0	0	0	0.176	0.965	0	0	0.97
Chpt1	Pcyt1a	5039723	5038081	10116.ENSRNOP00000007305	10116.ENSRNOP00000002403	0	0	0	0	0.064	0	0.9	0.705	0.97
Kat8	Kansl3	5046692	5044554	10116.ENSRNOP00000026527	10116.ENSRNOP00000020955	0	0	0	0	0.063	0.141	0.9	0.675	0.97
Rps4x	Rpl10a	5059880	5037475	10116.ENSRNOP00000067969	10116.ENSRNOP00000000603	0	0	0	0	0.575	0.918	0	0.228	0.97
P4hb	Os9	5053439	5051576	10116.ENSRNOP00000051841	10116.ENSRNOP00000044914	0	0	0	0	0.31	0	0.9	0.603	0.97
Rps29	Rps12	5050429	5045022	10116.ENSRNOP00000040703	10116.ENSRNOP00000022184	0.044	0	0	0	0.485	0.913	0	0.384	0.97
Hmgcs1	Hadhb	5045561	5042278	10116.ENSRNOP00000023554	10116.ENSRNOP00000014637	0.09	0	0	0	0.147	0.422	0.9	0.431	0.969
Rpl9	Rps23	5048515	5045083	10116.ENSRNOP00000032635	10116.ENSRNOP00000022348	0.07	0	0	0	0.915	0.484	0	0.348	0.969
Rpl36	Rpl36a	5055066	5052640	10116.ENSRNOP00000058934	10116.ENSRNOP00000049014	0	0	0	0	0.485	0.893	0	0.491	0.969
Rpl35a	Rps13	5054353	5049430	10116.ENSRNOP00000055825	10116.ENSRNOP00000036690	0	0	0	0	0.485	0.903	0	0.429	0.969
LOC684988	Etf1	5047210	5046645	10116.ENSRNOP00000027803	10116.ENSRNOP00000026398	0.044	0	0	0	0.373	0.95	0	0.094	0.969
Rpl35a	Rps3	5054353	5045692	10116.ENSRNOP00000055825	10116.ENSRNOP00000023935	0	0	0	0	0.511	0.907	0	0.376	0.969
Rab5b	Rab8a	5054982	5044477	10116.ENSRNOP00000058595	10116.ENSRNOP00000020748	0	0	0.445	0.881	0.106	0.647	0.9	0.661	0.969
Rpl9	Rpl19	5048515	5039407	10116.ENSRNOP00000032635	10116.ENSRNOP00000006359	0.044	0	0.281	0	0.885	0.398	0	0.441	0.968
Rps4x	Rpl23	5059880	5039094	10116.ENSRNOP00000067969	10116.ENSRNOP00000005471	0.086	0	0	0	0.602	0.918	0	0.054	0.968
Nlgn2	Shank1	5053871	5046515	10116.ENSRNOP00000053713	10116.ENSRNOP00000026100	0	0	0	0	0.211	0.318	0.9	0.484	0.968
Rpl35a	LOC684988	5054353	5047210	10116.ENSRNOP00000055825	10116.ENSRNOP00000027803	0	0	0	0	0.485	0.903	0	0.424	0.968
Ugcg	Asah1	5044613	5041866	10116.ENSRNOP00000021110	10116.ENSRNOP00000013463	0	0	0	0	0	0	0.9	0.695	0.968
Ddx39a	Ncbp1	5050417	5049893	10116.ENSRNOP00000040666	10116.ENSRNOP00000038713	0	0	0	0	0.266	0.221	0.9	0.516	0.968
Shank2	Dlg4	5058013	5055096	10116.ENSRNOP00000065594	10116.ENSRNOP00000059045	0	0	0	0	0.043	0.048	0.9	0.696	0.968
Hmgcs1	Aacs	5045561	5037686	10116.ENSRNOP00000023554	10116.ENSRNOP00000001292	0	0	0	0	0.415	0	0.9	0.506	0.968
Rpl36a	Rps13	5052640	5049430	10116.ENSRNOP00000049014	10116.ENSRNOP00000036690	0	0	0	0	0.505	0.907	0	0.372	0.968
Rps29	Rpl23	5050429	5039094	10116.ENSRNOP00000040703	10116.ENSRNOP00000005471	0.084	0	0	0	0.539	0.918	0	0.158	0.967
Rpl36a	LOC684988	5052640	5047210	10116.ENSRNOP00000049014	10116.ENSRNOP00000027803	0	0	0	0	0.502	0.907	0	0.36	0.967
Rpl35a	Rps12	5054353	5045022	10116.ENSRNOP00000055825	10116.ENSRNOP00000022184	0	0	0	0	0.425	0.885	0.54	0.057	0.967
Rps4x	LOC684988	5059880	5047210	10116.ENSRNOP00000067969	10116.ENSRNOP00000027803	0	0	0	0	0.539	0.918	0	0.205	0.967
Rps29	Rps2	5050429	5044035	10116.ENSRNOP00000040703	10116.ENSRNOP00000019508	0.066	0	0	0	0.398	0.891	0	0.532	0.967
LOC684988	Rpl23	5047210	5039094	10116.ENSRNOP00000027803	10116.ENSRNOP00000005471	0	0	0	0	0.53	0.917	0	0.218	0.967
U2af1l4	Sf3a2	5050608	5046556	10116.ENSRNOP00000041377	10116.ENSRNOP00000026202	0	0	0	0	0.111	0.606	0.9	0.191	0.967
Etf1	Rps27	5046645	5045301	10116.ENSRNOP00000026398	10116.ENSRNOP00000022897	0	0	0	0	0.092	0.966	0	0	0.967
Rpl36	Rps27	5055066	5045301	10116.ENSRNOP00000058934	10116.ENSRNOP00000022897	0	0	0	0	0.602	0.918	0	0.082	0.967
Sf3a2	Isy1	5046556	5041915	10116.ENSRNOP00000026202	10116.ENSRNOP00000013571	0	0	0	0	0.121	0.614	0.9	0.124	0.966
Rims1	Syn1	5042567	5042145	10116.ENSRNOP00000015454	10116.ENSRNOP00000014250	0	0	0	0	0.207	0	0.9	0.609	0.966
Rps4x	Rpl36	5059880	5055066	10116.ENSRNOP00000067969	10116.ENSRNOP00000058934	0	0	0	0	0.52	0.916	0	0.236	0.966
Rpl36	Rps23	5055066	5045083	10116.ENSRNOP00000058934	10116.ENSRNOP00000022348	0	0	0	0	0.571	0.916	0	0.141	0.966
Rpl3	Rps3	5055630	5045692	10116.ENSRNOP00000060662	10116.ENSRNOP00000023935	0.086	0	0	0	0.788	0.612	0	0.61	0.966
Rps29	Rpl10a	5050429	5037475	10116.ENSRNOP00000040703	10116.ENSRNOP00000000603	0.082	0	0	0	0.535	0.918	0	0.163	0.966
Polr1c	Tbp	5046389	5037965	10116.ENSRNOP00000025787	10116.ENSRNOP00000002038	0	0	0	0	0.064	0.561	0.9	0.258	0.965
Nup107	Pom121	5040338	5037946	10116.ENSRNOP00000009203	10116.ENSRNOP00000001968	0	0	0	0	0.063	0.269	0.9	0.552	0.965
Coq4	Coq3	5049928	5041849	10116.ENSRNOP00000038869	10116.ENSRNOP00000013384	0	0	0	0	0.104	0.27	0	0.951	0.965
Rps13	Fcf1	5049430	5039380	10116.ENSRNOP00000036690	10116.ENSRNOP00000006297	0.076	0	0	0	0.138	0.614	0.9	0	0.965
Gtf2h2	Tcea1	5054827	5040961	10116.ENSRNOP00000057895	10116.ENSRNOP00000010893	0	0	0	0	0.084	0.582	0.9	0.215	0.965
Rpl36	Rps25	5055066	5048636	10116.ENSRNOP00000058934	10116.ENSRNOP00000033144	0	0	0	0	0.504	0.897	0	0.362	0.964
Rab11a	Rab2a	5042618	5040110	10116.ENSRNOP00000015598	10116.ENSRNOP00000008522	0	0	0.436	0.913	0.064	0.611	0.9	0.756	0.964
Rpl35a	Rps27	5054353	5045301	10116.ENSRNOP00000055825	10116.ENSRNOP00000022897	0	0	0	0	0.518	0.915	0	0.192	0.964
Insr	Shc1	5055460	5047304	10116.ENSRNOP00000060141	10116.ENSRNOP00000028038	0	0	0	0	0	0.213	0.9	0.568	0.963
Rps15	Etf1	5049079	5046645	10116.ENSRNOP00000035156	10116.ENSRNOP00000026398	0	0	0	0	0.18	0.956	0	0.058	0.963
Rpl35a	Rpl19	5054353	5039407	10116.ENSRNOP00000055825	10116.ENSRNOP00000006359	0	0	0	0	0.354	0.879	0.54	0.11	0.963
Dlg2	Dlgap3	5053544	5043945	10116.ENSRNOP00000052268	10116.ENSRNOP00000019214	0	0	0	0	0.174	0.422	0.9	0.32	0.963
Rps4x	Rps24	5059880	5055202	10116.ENSRNOP00000067969	10116.ENSRNOP00000059382	0	0	0	0	0.609	0.642	0.54	0.505	0.963
Rab5b	Rab2a	5054982	5040110	10116.ENSRNOP00000058595	10116.ENSRNOP00000008522	0	0	0.438	0.884	0.064	0.597	0.9	0.65	0.963
Rps23	Fcf1	5045083	5039380	10116.ENSRNOP00000022348	10116.ENSRNOP00000006297	0	0	0	0	0.109	0.616	0.9	0	0.962
Timm23	Timm17a	5046858	5040405	10116.ENSRNOP00000026932	10116.ENSRNOP00000009398	0	0	0	0	0.357	0.541	0.54	0.757	0.962
Rps29	Etf1	5050429	5046645	10116.ENSRNOP00000040703	10116.ENSRNOP00000026398	0	0	0	0	0.15	0.957	0	0	0.962
LOC679683	Fcf1	5053664	5039380	10116.ENSRNOP00000052873	10116.ENSRNOP00000006297	0	0	0	0	0.072	0.629	0.9	0	0.962
Mtfmt	Mthfd1	5044101	5040065	10116.ENSRNOP00000019671	10116.ENSRNOP00000008374	0.119	0	0	0	0.063	0	0.9	0.6	0.962
LOC679683	Utp3	5053664	5038847	10116.ENSRNOP00000052873	10116.ENSRNOP00000004787	0	0	0	0	0.064	0.629	0.9	0	0.962
LOC679683	Utp14a	5053664	5053352	10116.ENSRNOP00000052873	10116.ENSRNOP00000051553	0	0	0	0	0.07	0.608	0.9	0.093	0.962
Rpl36a	Rps2	5052640	5044035	10116.ENSRNOP00000049014	10116.ENSRNOP00000019508	0	0	0	0	0.32	0.879	0	0.572	0.961
Eif2s2	Eif5	5045638	5041947	10116.ENSRNOP00000023786	10116.ENSRNOP00000013695	0	0	0	0.575	0.232	0.422	0.9	0.486	0.961
Rpl35a	Rpl36a	5054353	5052640	10116.ENSRNOP00000055825	10116.ENSRNOP00000049014	0	0	0	0	0.408	0.885	0	0.47	0.961
Utp14a	Rps13	5053352	5049430	10116.ENSRNOP00000051553	10116.ENSRNOP00000036690	0	0	0	0	0.123	0.593	0.9	0	0.961
Rps23	Utp3	5045083	5038847	10116.ENSRNOP00000022348	10116.ENSRNOP00000004787	0	0	0	0	0.063	0.616	0.9	0.048	0.961
Rps13	Utp3	5049430	5038847	10116.ENSRNOP00000036690	10116.ENSRNOP00000004787	0	0	0	0	0.063	0.614	0.9	0.057	0.961
Dlg4	Begain	5055096	5052819	10116.ENSRNOP00000059045	10116.ENSRNOP00000049699	0	0	0	0	0.223	0.396	0.9	0.277	0.961
Tyrobp	Sirpa	5047405	5039428	10116.ENSRNOP00000028284	10116.ENSRNOP00000006408	0	0	0	0	0.174	0.163	0.9	0.505	0.961
Rpl36a	Rpl23	5052640	5039094	10116.ENSRNOP00000049014	10116.ENSRNOP00000005471	0	0	0	0	0.535	0.907	0	0.17	0.961
Ncbp1	Snrnp35	5049893	5037726	10116.ENSRNOP00000038713	10116.ENSRNOP00000001402	0	0	0	0	0.064	0.558	0.9	0.155	0.96
Rps4x	Rpl35a	5059880	5054353	10116.ENSRNOP00000067969	10116.ENSRNOP00000055825	0	0	0	0	0.512	0.907	0	0.192	0.96
Uqcrq	Ndufs5	5057601	5049650	10116.ENSRNOP00000065074	10116.ENSRNOP00000037699	0	0	0	0	0.676	0.721	0	0.598	0.96
Gtf2h2	Polr1c	5054827	5046389	10116.ENSRNOP00000057895	10116.ENSRNOP00000025787	0	0	0	0	0.077	0.595	0.9	0	0.959
Rplp2	Rplp1	5049776	5042729	10116.ENSRNOP00000038214	10116.ENSRNOP00000015893	0	0	0	0	0.555	0.635	0	0.771	0.959
Utp14a	Rps23	5053352	5045083	10116.ENSRNOP00000051553	10116.ENSRNOP00000022348	0	0	0	0	0.081	0.599	0.9	0	0.959
Rps15	Rplp1	5049079	5042729	10116.ENSRNOP00000035156	10116.ENSRNOP00000015893	0	0	0	0	0.856	0.652	0	0.247	0.959
Rxrb	Thra	5050374	5041474	10116.ENSRNOP00000040499	10116.ENSRNOP00000012340	0	0	0	0.678	0.104	0.745	0.8	0.616	0.959
Rpl35a	Rps29	5054353	5050429	10116.ENSRNOP00000055825	10116.ENSRNOP00000040703	0	0	0	0	0.488	0.907	0	0.194	0.958
Paf1	Rnf40	5046801	5046285	10116.ENSRNOP00000026778	10116.ENSRNOP00000025500	0	0	0	0	0.064	0.422	0.9	0.319	0.958
Rxra	Thra	5041671	5041474	10116.ENSRNOP00000012892	10116.ENSRNOP00000012340	0	0	0	0.699	0.063	0.745	0.8	0.668	0.958
Rps4x	Rpl19	5059880	5039407	10116.ENSRNOP00000067969	10116.ENSRNOP00000006359	0.072	0	0	0	0.518	0.89	0	0.26	0.958
Mre11a	Brca2	5041687	5037752	10116.ENSRNOP00000012940	10116.ENSRNOP00000001475	0	0	0	0	0.064	0	0.9	0.589	0.958
Rxrb	Thrb	5050374	5040175	10116.ENSRNOP00000040499	10116.ENSRNOP00000008752	0	0	0	0.649	0	0.745	0.8	0.619	0.958
Coq3	Coq2	5041849	5038268	10116.ENSRNOP00000013384	10116.ENSRNOP00000002987	0.124	0	0.291	0	0.141	0.08	0	0.928	0.958
Rpl36a	Rplp1	5052640	5042729	10116.ENSRNOP00000049014	10116.ENSRNOP00000015893	0	0	0	0	0.79	0.612	0	0.517	0.957
Rps25	Rpl23	5048636	5039094	10116.ENSRNOP00000033144	10116.ENSRNOP00000005471	0	0	0	0	0.539	0.907	0	0.084	0.957
Polr1b	Tbp	5046051	5037965	10116.ENSRNOP00000024882	10116.ENSRNOP00000002038	0	0	0	0	0.064	0.42	0.9	0.316	0.957
Cul5	Tceb2	5040982	5039605	10116.ENSRNOP00000010956	10116.ENSRNOP00000006892	0	0	0	0	0	0.607	0	0.895	0.957
Rps23	Rplp1	5045083	5042729	10116.ENSRNOP00000022348	10116.ENSRNOP00000015893	0	0	0	0	0.826	0.652	0	0.34	0.956
Ftsj3	Pes1	5041818	5039275	10116.ENSRNOP00000013295	10116.ENSRNOP00000005996	0	0	0	0	0.671	0.737	0.54	0	0.956
Fyttd1	Chtop	5051403	5040799	10116.ENSRNOP00000044272	10116.ENSRNOP00000010455	0	0	0	0	0.063	0.14	0.9	0.527	0.956
Notch3	Jag1	5049620	5040872	10116.ENSRNOP00000037570	10116.ENSRNOP00000010638	0	0	0	0.693	0.063	0.413	0.9	0.914	0.956
Rps29	Rpl19	5050429	5039407	10116.ENSRNOP00000040703	10116.ENSRNOP00000006359	0.066	0	0	0	0.412	0.89	0	0.362	0.956
Rpl35a	Rps23	5054353	5045083	10116.ENSRNOP00000055825	10116.ENSRNOP00000022348	0	0	0	0	0.474	0.907	0	0.157	0.955
Apba1	Rims1	5044258	5042567	10116.ENSRNOP00000020123	10116.ENSRNOP00000015454	0	0	0	0	0.195	0	0.9	0.488	0.955
Ndufs6	Uqcrh	5058869	5043060	10116.ENSRNOP00000066688	10116.ENSRNOP00000016751	0	0	0	0	0.729	0.748	0	0.39	0.954
Dvl1	Csnk1e	5046659	5043569	10116.ENSRNOP00000026439	10116.ENSRNOP00000018126	0	0	0	0	0.063	0.431	0.9	0.252	0.954
Ncbp1	Sf3a2	5049893	5046556	10116.ENSRNOP00000038713	10116.ENSRNOP00000026202	0	0	0	0	0.063	0.557	0.9	0	0.954
Ncbp1	Nup107	5049893	5040338	10116.ENSRNOP00000038713	10116.ENSRNOP00000009203	0	0	0	0	0.525	0	0.9	0.111	0.954
Arhgdia	Rhobtb2	5053438	5045669	10116.ENSRNOP00000051840	10116.ENSRNOP00000023872	0	0	0	0	0.063	0.423	0.9	0.256	0.954
Nme4	Ak3	5047124	5044476	10116.ENSRNOP00000027593	10116.ENSRNOP00000020744	0.044	0	0	0	0.065	0.075	0.9	0.525	0.953
Irf3	Arih1	5047203	5041920	10116.ENSRNOP00000027786	10116.ENSRNOP00000013581	0	0	0	0	0	0	0.9	0.552	0.953
Ndufs6	Uqcrq	5058869	5057601	10116.ENSRNOP00000066688	10116.ENSRNOP00000065074	0	0	0	0	0.745	0.78	0	0.229	0.953
Gtf2h2	Polr1b	5054827	5046051	10116.ENSRNOP00000057895	10116.ENSRNOP00000024882	0	0	0	0	0.063	0.514	0.9	0.083	0.952
Rps25	Rpl9	5048636	5048515	10116.ENSRNOP00000033144	10116.ENSRNOP00000032635	0	0	0	0	0.796	0.423	0	0.627	0.952
Coq4	Coq2	5049928	5038268	10116.ENSRNOP00000038869	10116.ENSRNOP00000002987	0	0	0	0	0.063	0	0	0.951	0.952
Rps10	Rpl23	5055923	5039094	10116.ENSRNOP00000061642	10116.ENSRNOP00000005471	0	0	0	0	0.498	0.903	0	0.102	0.952
Shc1	Gab2	5047304	5042911	10116.ENSRNOP00000028038	10116.ENSRNOP00000016361	0	0	0	0	0.063	0.181	0.9	0.445	0.951
Drg1	Zc3h15	5046189	5039712	10116.ENSRNOP00000025241	10116.ENSRNOP00000007276	0	0	0	0	0.611	0.761	0	0.521	0.951
Nos3	Asl	5041726	5037658	10116.ENSRNOP00000013058	10116.ENSRNOP00000001211	0	0	0	0	0.063	0	0.9	0.522	0.951
Pak1ip1	Wdr12	5048726	5045528	10116.ENSRNOP00000033583	10116.ENSRNOP00000023463	0	0	0.324	0	0.761	0.398	0	0.559	0.951
Rps2	Rpl19	5044035	5039407	10116.ENSRNOP00000019508	10116.ENSRNOP00000006359	0.044	0	0	0	0.306	0.874	0	0.487	0.951
LOC684988	Rpl19	5047210	5039407	10116.ENSRNOP00000027803	10116.ENSRNOP00000006359	0	0	0	0	0.474	0.885	0	0.253	0.951
Ppard	Rxra	5051852	5041671	10116.ENSRNOP00000045974	10116.ENSRNOP00000012892	0	0	0	0.708	0.063	0.411	0.9	0.593	0.95
Dlg4	Syngap1	5055096	5051341	10116.ENSRNOP00000059045	10116.ENSRNOP00000044041	0	0	0	0	0.222	0.522	0	0.876	0.95
Rps12	Fcf1	5045022	5039380	10116.ENSRNOP00000022184	10116.ENSRNOP00000006297	0.043	0	0	0	0.187	0.42	0.9	0.068	0.95
LOC679683	Rplp1	5053664	5042729	10116.ENSRNOP00000052873	10116.ENSRNOP00000015893	0	0	0	0	0.572	0.857	0	0.262	0.95
Rpl24	Uba52	5057430	5046917	10116.ENSRNOP00000064870	10116.ENSRNOP00000027073	0	0	0	0	0.632	0.837	0	0.239	0.95
Nlgn2	Dlg2	5053871	5053544	10116.ENSRNOP00000053713	10116.ENSRNOP00000052268	0	0	0	0	0.106	0.345	0.9	0.234	0.949
Rpl24	LOC679683	5057430	5053664	10116.ENSRNOP00000064870	10116.ENSRNOP00000052873	0	0	0	0	0.559	0.84	0	0.325	0.948
Rab8a	Rab11a	5044477	5042618	10116.ENSRNOP00000020748	10116.ENSRNOP00000015598	0	0	0.444	0.914	0.083	0.422	0.9	0.914	0.948
Ube2i	Nup107	5045882	5040338	10116.ENSRNOP00000024406	10116.ENSRNOP00000009203	0	0	0	0	0.077	0.307	0.9	0.295	0.948
Fyttd1	Ddx39a	5051403	5050417	10116.ENSRNOP00000044272	10116.ENSRNOP00000040666	0	0	0	0	0.063	0.148	0.9	0.428	0.948
Crtc1	Creb1	5048120	5043622	10116.ENSRNOP00000030925	10116.ENSRNOP00000018326	0	0	0	0	0.063	0.482	0.6	0.759	0.947
Rps24	LOC679683	5055202	5053664	10116.ENSRNOP00000059382	10116.ENSRNOP00000052873	0	0	0	0	0.544	0.858	0	0.255	0.947
Ino80c	Uchl5	5045016	5038878	10116.ENSRNOP00000022169	10116.ENSRNOP00000004881	0	0	0	0	0.063	0.47	0.9	0.065	0.947
LOC679683	Rps27	5053664	5045301	10116.ENSRNOP00000052873	10116.ENSRNOP00000022897	0	0	0	0	0.549	0.84	0	0.332	0.947
Rpl9	Rps12	5048515	5045022	10116.ENSRNOP00000032635	10116.ENSRNOP00000022184	0.042	0	0	0	0.904	0.422	0	0.101	0.946
Rps14	Rplp1	5054455	5042729	10116.ENSRNOP00000056260	10116.ENSRNOP00000015893	0	0	0	0	0.613	0.742	0	0.509	0.946
Eif4h	Eif5	5051128	5041947	10116.ENSRNOP00000043254	10116.ENSRNOP00000013695	0	0	0	0	0.103	0.056	0.9	0.439	0.946
Hnrpd	Psmc4	5051983	5046403	10116.ENSRNOP00000046491	10116.ENSRNOP00000025819	0	0	0	0	0.05	0.069	0.9	0.468	0.946
Ncbp1	Casc3	5049893	5041779	10116.ENSRNOP00000038713	10116.ENSRNOP00000013204	0	0	0	0	0	0	0.9	0.474	0.945
Sqle	Dhcr24	5041669	5040408	10116.ENSRNOP00000012883	10116.ENSRNOP00000009402	0.067	0	0	0	0.809	0	0	0.718	0.945
Sumo1	Nup107	5044974	5040338	10116.ENSRNOP00000022048	10116.ENSRNOP00000009203	0	0	0	0	0.063	0.316	0.9	0.243	0.945
Ddx39a	Casc3	5050417	5041779	10116.ENSRNOP00000040666	10116.ENSRNOP00000013204	0	0	0	0	0.063	0.407	0.9	0.114	0.944
Stub1	Ube4a	5046852	5044694	10116.ENSRNOP00000026921	10116.ENSRNOP00000021321	0	0	0	0	0.063	0.15	0.9	0.388	0.944
Gabrb3	Gabra1	5056027	5038829	10116.ENSRNOP00000061969	10116.ENSRNOP00000004725	0	0	0	0.846	0.071	0.777	0.72	0.761	0.944
Arhgef2	Rhobtb2	5046958	5045669	10116.ENSRNOP00000027182	10116.ENSRNOP00000023872	0	0	0	0	0.063	0.38	0.9	0.158	0.944
Rps19	Rps25	5058962	5048636	10116.ENSRNOP00000066808	10116.ENSRNOP00000033144	0	0	0	0	0.658	0.452	0.54	0.424	0.943
Gtf2h2	Znrd1	5054827	5037588	10116.ENSRNOP00000057895	10116.ENSRNOP00000001012	0	0	0	0	0.084	0.397	0.9	0.094	0.943
LOC679683	Eif2s2	5053664	5045638	10116.ENSRNOP00000052873	10116.ENSRNOP00000023786	0	0	0	0	0.458	0	0.9	0	0.943
Rpl35a	Rps25	5054353	5048636	10116.ENSRNOP00000055825	10116.ENSRNOP00000033144	0	0	0	0	0.456	0.888	0	0.151	0.943
Rpl14	Rps3	5055953	5045692	10116.ENSRNOP00000061747	10116.ENSRNOP00000023935	0.073	0	0	0	0.687	0.614	0	0.556	0.943
Ap2b1	Necap1	5060044	5041806	10116.ENSRNOP00000068516	10116.ENSRNOP00000013272	0	0	0	0	0.064	0.419	0.9	0.088	0.943
Cox7a2	Ndufs5	5055543	5049650	10116.ENSRNOP00000060398	10116.ENSRNOP00000037699	0	0	0	0	0.894	0.218	0	0.372	0.943
Xrcc1	Mre11a	5046909	5041687	10116.ENSRNOP00000027057	10116.ENSRNOP00000012940	0	0	0	0	0.064	0	0.9	0.441	0.943
Notch3	Furin	5049620	5042591	10116.ENSRNOP00000037570	10116.ENSRNOP00000015521	0	0	0	0	0	0.087	0.9	0.433	0.943
Shc1	Igf1r	5047304	5043960	10116.ENSRNOP00000028038	10116.ENSRNOP00000019267	0	0	0	0	0	0.213	0.8	0.67	0.943
Rps10	Rpl10a	5055923	5037475	10116.ENSRNOP00000061642	10116.ENSRNOP00000000603	0	0	0	0	0.824	0.538	0	0.343	0.942
Rpl9	Uba52	5048515	5046917	10116.ENSRNOP00000032635	10116.ENSRNOP00000027073	0	0	0	0	0.848	0.613	0	0.098	0.942
Hnrpd	Isy1	5051983	5041915	10116.ENSRNOP00000046491	10116.ENSRNOP00000013571	0	0	0	0	0	0.407	0.9	0.112	0.942
Eif4e	Mknk2	5056576	5050153	10116.ENSRNOP00000063699	10116.ENSRNOP00000039672	0	0	0	0	0	0.216	0.8	0.654	0.941
Rpl9	Rps27	5048515	5045301	10116.ENSRNOP00000032635	10116.ENSRNOP00000022897	0	0	0	0	0.85	0.532	0	0.231	0.941
Cbx7	Pcgf1	5045194	5041059	10116.ENSRNOP00000022631	10116.ENSRNOP00000011173	0	0	0	0	0.05	0.421	0.72	0.662	0.941
Rpl14	Rpl35a	5055953	5054353	10116.ENSRNOP00000061747	10116.ENSRNOP00000055825	0	0	0	0	0.526	0.587	0.54	0.424	0.941
Nsa2	Ftsj3	5045006	5041818	10116.ENSRNOP00000022138	10116.ENSRNOP00000013295	0	0	0	0	0.551	0.612	0.54	0.358	0.941
Rps19	Rps13	5058962	5049430	10116.ENSRNOP00000066808	10116.ENSRNOP00000036690	0	0	0	0	0.465	0.501	0.54	0.576	0.941
Cs	Got2	5049027	5042751	10116.ENSRNOP00000034921	10116.ENSRNOP00000015956	0	0	0	0	0.116	0	0.8	0.695	0.941
Dpm2	Gmppa	5057634	5046914	10116.ENSRNOP00000065111	10116.ENSRNOP00000027064	0	0	0	0	0.064	0	0.8	0.706	0.94
Snapc3	Tbp	5042503	5037965	10116.ENSRNOP00000015254	10116.ENSRNOP00000002038	0	0	0	0	0.064	0	0.9	0.411	0.94
Psmc4	Ublcp1	5046403	5039294	10116.ENSRNOP00000025819	10116.ENSRNOP00000006063	0	0	0	0	0.623	0.752	0	0.419	0.94
Nlgn2	Dlgap3	5053871	5043945	10116.ENSRNOP00000053713	10116.ENSRNOP00000019214	0	0	0	0	0.155	0.068	0.9	0.327	0.94
Ube2i	Mre11a	5045882	5041687	10116.ENSRNOP00000024406	10116.ENSRNOP00000012940	0	0	0	0	0.063	0.307	0.9	0.195	0.94
LOC679683	Rps3	5053664	5045692	10116.ENSRNOP00000052873	10116.ENSRNOP00000023935	0.086	0	0	0	0.558	0.8	0	0.345	0.939
Sdc3	Ndst1	5050675	5046430	10116.ENSRNOP00000041634	10116.ENSRNOP00000025881	0	0	0	0	0.063	0	0.9	0.401	0.939
Polr1c	Snapc3	5046389	5042503	10116.ENSRNOP00000025787	10116.ENSRNOP00000015254	0	0	0	0	0.048	0	0.9	0.414	0.939
Rps2	Rpl23	5044035	5039094	10116.ENSRNOP00000019508	10116.ENSRNOP00000005471	0.068	0	0	0	0.42	0.886	0	0.136	0.939
Rps3	Rplp1	5045692	5042729	10116.ENSRNOP00000023935	10116.ENSRNOP00000015893	0	0	0	0	0.804	0.649	0	0.182	0.939
Ndufs5	Ndufb4	5049650	5038473	10116.ENSRNOP00000037699	10116.ENSRNOP00000003674	0	0	0	0	0.772	0.614	0	0.36	0.939
Coq4	Coq7	5049928	5045342	10116.ENSRNOP00000038869	10116.ENSRNOP00000022988	0	0	0	0	0.064	0.27	0	0.917	0.938
Rps19	Uba52	5058962	5046917	10116.ENSRNOP00000066808	10116.ENSRNOP00000027073	0	0	0	0	0.819	0.622	0	0.174	0.938
L3mbtl2	Max	5048349	5040980	10116.ENSRNOP00000031908	10116.ENSRNOP00000010954	0	0	0	0	0.062	0.151	0.9	0.317	0.938
Rpl36a	Etf1	5052640	5046645	10116.ENSRNOP00000049014	10116.ENSRNOP00000026398	0	0	0	0	0.138	0.925	0	0.111	0.938
Cox6b2	Cox4i1	5049174	5045724	10116.ENSRNOP00000035591	10116.ENSRNOP00000024033	0	0	0	0	0.381	0.806	0	0.528	0.938
Btrc	Csnk1e	5045120	5043569	10116.ENSRNOP00000022426	10116.ENSRNOP00000018126	0	0	0	0	0.064	0.909	0	0.321	0.937
Ftsj3	Rrp15	5041818	5038376	10116.ENSRNOP00000013295	10116.ENSRNOP00000003359	0	0	0	0	0.787	0	0.54	0.416	0.937
Sufu	Btrc	5046881	5045120	10116.ENSRNOP00000026987	10116.ENSRNOP00000022426	0	0	0	0	0.063	0.148	0.9	0.313	0.937
Ap2b1	Ap4m1	5060044	5037891	10116.ENSRNOP00000068516	10116.ENSRNOP00000001827	0	0	0	0	0.12	0.593	0.72	0.452	0.937
Rpl35a	Etf1	5054353	5046645	10116.ENSRNOP00000055825	10116.ENSRNOP00000026398	0	0	0	0	0.23	0.92	0	0	0.936
Hnrpd	Sf3a2	5051983	5046556	10116.ENSRNOP00000046491	10116.ENSRNOP00000026202	0	0	0	0	0.089	0.322	0.9	0.092	0.936
Creb1	Atf2	5043622	5038012	10116.ENSRNOP00000018326	10116.ENSRNOP00000002174	0	0	0	0	0.064	0.193	0.8	0.63	0.936
Gpaa1	Pgap1	5052957	5043512	10116.ENSRNOP00000050220	10116.ENSRNOP00000017967	0	0	0	0	0.063	0.058	0.9	0.364	0.936
Rps12	Utp3	5045022	5038847	10116.ENSRNOP00000022184	10116.ENSRNOP00000004787	0	0	0	0	0.141	0.301	0.9	0.065	0.936
Tbp	Znrd1	5037965	5037588	10116.ENSRNOP00000002038	10116.ENSRNOP00000001012	0	0	0	0	0.05	0.307	0.9	0.13	0.935
Rpl14	Rps15	5055953	5049079	10116.ENSRNOP00000061747	10116.ENSRNOP00000035156	0.073	0	0	0	0.668	0.617	0	0.516	0.935
Ube2f	Ube2j2	5046905	5046791	10116.ENSRNOP00000027050	10116.ENSRNOP00000026752	0	0	0	0	0.064	0	0.9	0.364	0.935
Rps25	Etf1	5048636	5046645	10116.ENSRNOP00000033144	10116.ENSRNOP00000026398	0	0	0	0	0.137	0.927	0	0	0.934
Glrx2	Txn1	5054567	5042945	10116.ENSRNOP00000056811	10116.ENSRNOP00000016447	0.053	0	0	0	0.38	0.396	0	0.836	0.934
Krt10	Krt9	5047846	5043980	10116.ENSRNOP00000029821	10116.ENSRNOP00000019330	0	0	0	0.922	0.082	0.303	0.9	0.704	0.934
Kat8	Ogt	5046692	5038814	10116.ENSRNOP00000026527	10116.ENSRNOP00000004692	0	0	0	0	0.049	0.209	0.9	0.23	0.934
Sumo1	Vhl	5044974	5041958	10116.ENSRNOP00000022048	10116.ENSRNOP00000013727	0	0	0	0	0	0.219	0.9	0.216	0.933
Ndufs6	Ndufs5	5058869	5049650	10116.ENSRNOP00000066688	10116.ENSRNOP00000037699	0	0	0	0	0.593	0.707	0	0.484	0.933
Cox6b2	Cox6c	5049174	5042199	10116.ENSRNOP00000035591	10116.ENSRNOP00000014407	0	0	0	0	0.571	0.755	0	0.417	0.933
Abi2	Crk	5052898	5039427	10116.ENSRNOP00000050008	10116.ENSRNOP00000006407	0	0	0	0	0.064	0.094	0.9	0.298	0.932
Shank2	Nlgn2	5058013	5053871	10116.ENSRNOP00000065594	10116.ENSRNOP00000053713	0	0	0	0	0	0	0.9	0.354	0.932
Rhobtb2	Mcf2l	5045669	5045480	10116.ENSRNOP00000023872	10116.ENSRNOP00000023352	0	0	0	0	0.098	0.315	0.9	0	0.932
Cox7a2	Ndufb4	5055543	5038473	10116.ENSRNOP00000060398	10116.ENSRNOP00000003674	0	0	0	0	0.861	0	0	0.523	0.931
Wdr12	Rrp15	5045528	5038376	10116.ENSRNOP00000023463	10116.ENSRNOP00000003359	0	0	0	0	0.765	0	0.54	0.415	0.931
Ap2b1	Pip5k1c	5060044	5054820	10116.ENSRNOP00000068516	10116.ENSRNOP00000057873	0	0	0	0	0.153	0.917	0	0.105	0.931
LOC679683	Rps15	5053664	5049079	10116.ENSRNOP00000052873	10116.ENSRNOP00000035156	0.086	0	0	0	0.556	0.8	0	0.25	0.93
Paf1	Polr2g	5046801	5046605	10116.ENSRNOP00000026778	10116.ENSRNOP00000026313	0	0	0	0	0.063	0.314	0.9	0	0.93
Gls	Gfpt1	5049774	5046130	10116.ENSRNOP00000038205	10116.ENSRNOP00000025070	0.044	0	0	0	0	0	0.9	0.332	0.93
Fyttd1	Ncbp1	5051403	5049893	10116.ENSRNOP00000044272	10116.ENSRNOP00000038713	0	0	0	0	0.102	0	0.9	0.288	0.93
Rpl35a	Rplp1	5054353	5042729	10116.ENSRNOP00000055825	10116.ENSRNOP00000015893	0	0	0	0	0.533	0.61	0.54	0.268	0.93
Rps4x	Rps2	5059880	5044035	10116.ENSRNOP00000067969	10116.ENSRNOP00000019508	0.072	0	0	0	0.475	0.482	0.54	0.493	0.93
Rpl24	Rps24	5057430	5055202	10116.ENSRNOP00000064870	10116.ENSRNOP00000059382	0.042	0	0	0	0.546	0.739	0	0.462	0.93
U2af1l4	Ddx39a	5050608	5050417	10116.ENSRNOP00000041377	10116.ENSRNOP00000040666	0	0	0	0	0.183	0.056	0.9	0.191	0.929
Rpl3	Rpl9	5055630	5048515	10116.ENSRNOP00000060662	10116.ENSRNOP00000032635	0.07	0	0.257	0	0.574	0.515	0	0.583	0.929
Rps13	Eif2s2	5049430	5045638	10116.ENSRNOP00000036690	10116.ENSRNOP00000023786	0	0	0	0	0.301	0	0.9	0.076	0.929
Rps19	Rpl36a	5058962	5052640	10116.ENSRNOP00000066808	10116.ENSRNOP00000049014	0.053	0	0	0	0.783	0.448	0	0.449	0.929
Gmppa	Gmds	5046914	5045613	10116.ENSRNOP00000027064	10116.ENSRNOP00000023691	0.116	0	0	0	0.049	0	0.9	0.262	0.929
Hnrpd	Srsf11	5051983	5051112	10116.ENSRNOP00000046491	10116.ENSRNOP00000043202	0	0	0	0	0.081	0.091	0.9	0.242	0.928
Rps10	Etf1	5055923	5046645	10116.ENSRNOP00000061642	10116.ENSRNOP00000026398	0	0	0	0	0.093	0.924	0	0	0.928
Pes1	Rrp15	5039275	5038376	10116.ENSRNOP00000005996	10116.ENSRNOP00000003359	0	0	0	0	0.656	0.587	0.54	0	0.928
Paf1	Tcea1	5046801	5040961	10116.ENSRNOP00000026778	10116.ENSRNOP00000010893	0	0	0	0	0.064	0.198	0.9	0.159	0.928
Gfpt1	Hk2	5046130	5040192	10116.ENSRNOP00000025070	10116.ENSRNOP00000008813	0	0	0	0	0.063	0	0.9	0.297	0.928
Rps24	Rpl35a	5055202	5054353	10116.ENSRNOP00000059382	10116.ENSRNOP00000055825	0	0	0	0	0.524	0.535	0	0.699	0.927
Rps4x	Rps19	5059880	5058962	10116.ENSRNOP00000067969	10116.ENSRNOP00000066808	0	0	0	0	0.482	0.548	0.54	0.403	0.927
LOC679683	Rps29	5053664	5050429	10116.ENSRNOP00000052873	10116.ENSRNOP00000040703	0.084	0	0	0	0.549	0.792	0	0.258	0.927
Map2k7	Ikbkg	5054970	5053730	10116.ENSRNOP00000058535	10116.ENSRNOP00000053114	0	0	0	0	0.063	0	0.9	0.287	0.927
Utp14a	Rps12	5053352	5045022	10116.ENSRNOP00000051553	10116.ENSRNOP00000022184	0	0	0	0	0.087	0.25	0.9	0.057	0.926
Eif2s2	Rps23	5045638	5045083	10116.ENSRNOP00000023786	10116.ENSRNOP00000022348	0	0	0	0	0.28	0	0.9	0.055	0.926
Hnrpd	Ncbp1	5051983	5049893	10116.ENSRNOP00000046491	10116.ENSRNOP00000038713	0	0	0	0	0.063	0.213	0.9	0.12	0.926
Uimc1	Mre11a	5045223	5041687	10116.ENSRNOP00000022704	10116.ENSRNOP00000012940	0	0	0	0	0.062	0	0.9	0.278	0.926
Rps24	LOC684988	5055202	5047210	10116.ENSRNOP00000059382	10116.ENSRNOP00000027803	0.082	0	0	0	0.565	0.635	0	0.555	0.926
Gata3	Tbp	5046550	5037965	10116.ENSRNOP00000026187	10116.ENSRNOP00000002038	0	0	0	0	0.063	0.139	0.9	0.201	0.926
Hnrpd	U2af1l4	5051983	5050608	10116.ENSRNOP00000046491	10116.ENSRNOP00000041377	0	0	0	0	0.072	0.204	0.9	0.127	0.926
Ntrk2	Crk	5051759	5039427	10116.ENSRNOP00000045635	10116.ENSRNOP00000006407	0	0	0	0	0.045	0.23	0.9	0.12	0.926
Tceb1	Ube2f	5059457	5046905	10116.ENSRNOP00000067410	10116.ENSRNOP00000027050	0	0	0	0	0.063	0	0.9	0.269	0.925
Tyrobp	Aif1	5047405	5037635	10116.ENSRNOP00000028284	10116.ENSRNOP00000001135	0	0	0	0	0.88	0	0	0.404	0.925
Ikbkg	Ube2i	5053730	5045882	10116.ENSRNOP00000053114	10116.ENSRNOP00000024406	0	0	0	0	0	0.196	0.9	0.15	0.925
Rps19	Rps2	5058962	5044035	10116.ENSRNOP00000066808	10116.ENSRNOP00000019508	0	0	0	0	0.317	0.418	0.54	0.637	0.924
Nsa2	Pes1	5045006	5039275	10116.ENSRNOP00000022138	10116.ENSRNOP00000005996	0	0	0	0	0.539	0.592	0.54	0.234	0.924
Tceb1	Btbd1	5059457	5046721	10116.ENSRNOP00000067410	10116.ENSRNOP00000026595	0	0	0	0	0.063	0	0.9	0.261	0.924
Txn2	Txn1	5055640	5042945	10116.ENSRNOP00000060694	10116.ENSRNOP00000016447	0	0	0.331	0.836	0.377	0.32	0.8	0.825	0.924
LOC679683	Eif4h	5053664	5051128	10116.ENSRNOP00000052873	10116.ENSRNOP00000043254	0	0	0	0	0.081	0.245	0.9	0	0.924
Ube2i	Rxra	5045882	5041671	10116.ENSRNOP00000024406	10116.ENSRNOP00000012892	0	0	0	0	0	0.173	0.9	0.16	0.924
Nme4	Nme1	5047124	5038468	10116.ENSRNOP00000027593	10116.ENSRNOP00000003658	0	0	0.449	0.955	0.063	0.612	0.8	0.417	0.923
Sumo1	Mre11a	5044974	5041687	10116.ENSRNOP00000022048	10116.ENSRNOP00000012940	0	0	0	0	0.063	0.215	0.9	0.085	0.923
Rps12	Eif5	5045022	5041947	10116.ENSRNOP00000022184	10116.ENSRNOP00000013695	0	0	0	0	0.064	0.062	0.9	0.23	0.923
Eif4h	Rps23	5051128	5045083	10116.ENSRNOP00000043254	10116.ENSRNOP00000022348	0	0	0	0	0.106	0.211	0.9	0.049	0.923
Sepw1	Selt	5043718	5043606	10116.ENSRNOP00000018559	10116.ENSRNOP00000018248	0	0	0	0	0	0	0	0.923	0.923
Uba52	Psmc4	5046917	5046403	10116.ENSRNOP00000027073	10116.ENSRNOP00000025819	0	0	0	0	0.087	0.917	0	0.068	0.923
Ap2b1	Rab5b	5060044	5054982	10116.ENSRNOP00000068516	10116.ENSRNOP00000058595	0	0	0	0	0.153	0	0.9	0.168	0.923
Pip5k1c	Pip4k2b	5054820	5043519	10116.ENSRNOP00000057873	10116.ENSRNOP00000017989	0	0	0	0.736	0.081	0.044	0.9	0.75	0.923
Shank2	Dlg2	5058013	5053544	10116.ENSRNOP00000065594	10116.ENSRNOP00000052268	0	0	0	0	0.043	0.048	0.9	0.255	0.923
Gorasp1	Trappc3	5045883	5042188	10116.ENSRNOP00000024408	10116.ENSRNOP00000014383	0	0	0	0	0	0	0.9	0.262	0.923
Uimc1	Sumo1	5045223	5044974	10116.ENSRNOP00000022704	10116.ENSRNOP00000022048	0	0	0	0	0.063	0.152	0.9	0.137	0.922
Nqo1	Nfe2l2	5043219	5037989	10116.ENSRNOP00000017175	10116.ENSRNOP00000002114	0	0	0	0	0.063	0	0	0.921	0.922
Rab5b	Rab14	5054982	5046342	10116.ENSRNOP00000058595	10116.ENSRNOP00000025649	0	0	0.441	0.872	0.064	0.137	0.9	0.587	0.922
Rps19	Rpl10a	5058962	5037475	10116.ENSRNOP00000066808	10116.ENSRNOP00000000603	0.07	0	0	0	0.788	0.499	0	0.303	0.922
Hmgn1	Tcea1	5059475	5040961	10116.ENSRNOP00000067432	10116.ENSRNOP00000010893	0	0	0	0	0.063	0	0.9	0.236	0.922
Tmem147	Ncln	5047495	5039664	10116.ENSRNOP00000028514	10116.ENSRNOP00000007110	0	0	0	0	0.063	0	0	0.92	0.922
Rab8a	Rab2a	5044477	5040110	10116.ENSRNOP00000020748	10116.ENSRNOP00000008522	0	0	0.437	0.908	0.088	0.114	0.9	0.748	0.921
Carm1	Tbp	5050984	5037965	10116.ENSRNOP00000042739	10116.ENSRNOP00000002038	0	0	0	0	0.064	0	0.9	0.225	0.921
Btrc	Tle3	5045120	5043675	10116.ENSRNOP00000022426	10116.ENSRNOP00000018467	0	0	0	0	0.063	0	0.9	0.231	0.921
Ak3	Nme1	5044476	5038468	10116.ENSRNOP00000020744	10116.ENSRNOP00000003658	0.044	0	0	0	0.065	0.075	0.9	0.194	0.921
Ikbkg	Btrc	5053730	5045120	10116.ENSRNOP00000053114	10116.ENSRNOP00000022426	0	0	0	0	0	0.169	0.9	0.135	0.921
Eif4h	Rps13	5051128	5049430	10116.ENSRNOP00000043254	10116.ENSRNOP00000036690	0	0	0	0	0.09	0.21	0.9	0	0.921
Kif1b	Kif13b	5052694	5048484	10116.ENSRNOP00000049243	10116.ENSRNOP00000032499	0	0	0	0.703	0.064	0.05	0.9	0.646	0.921
Socs2	Cul5	5041338	5040982	10116.ENSRNOP00000011948	10116.ENSRNOP00000010956	0	0	0	0	0.063	0.838	0	0.523	0.921
Rpl14	Rps27	5055953	5045301	10116.ENSRNOP00000061747	10116.ENSRNOP00000022897	0	0	0	0	0.673	0.628	0	0.403	0.921
Nme3	Ak3	5044815	5044476	10116.ENSRNOP00000021650	10116.ENSRNOP00000020744	0.044	0	0	0	0.065	0.075	0.9	0.184	0.92
Aldoart2	Actn4	5050613	5047195	10116.ENSRNOP00000041393	10116.ENSRNOP00000027773	0	0	0	0	0.139	0.147	0.9	0	0.92
Cox7a2l2	Cox6c	5049574	5042199	10116.ENSRNOP00000037372	10116.ENSRNOP00000014407	0	0	0	0	0.629	0.552	0	0.561	0.92
Rpl14	Rps14	5055953	5054455	10116.ENSRNOP00000061747	10116.ENSRNOP00000056260	0.069	0	0	0	0.628	0.645	0	0.43	0.92
Furin	Pdgfa	5042591	5037868	10116.ENSRNOP00000015521	10116.ENSRNOP00000001775	0	0	0	0	0	0.181	0.9	0.106	0.92
Gmppa	Pmm1	5046914	5039681	10116.ENSRNOP00000027064	10116.ENSRNOP00000007164	0.098	0	0	0	0.064	0	0.9	0.172	0.92
Dlg4	Syn1	5055096	5042145	10116.ENSRNOP00000059045	10116.ENSRNOP00000014250	0	0	0	0	0.235	0.114	0	0.891	0.92
Rxrb	Ncoa2	5050374	5041011	10116.ENSRNOP00000040499	10116.ENSRNOP00000011026	0	0	0	0	0	0.754	0.6	0.256	0.92
Ncbp1	Chtop	5049893	5040799	10116.ENSRNOP00000038713	10116.ENSRNOP00000010455	0	0	0	0	0.063	0	0.9	0.22	0.92
Cdk4	Smarca2	5048988	5043057	10116.ENSRNOP00000034754	10116.ENSRNOP00000016740	0	0	0	0	0.086	0.151	0.9	0.095	0.92
Gna13	Rhobtb2	5053469	5045669	10116.ENSRNOP00000051938	10116.ENSRNOP00000023872	0	0	0	0	0.063	0.174	0.9	0.095	0.92
Shc1	Fgf22	5047304	5041331	10116.ENSRNOP00000028038	10116.ENSRNOP00000011936	0	0	0	0	0	0	0.9	0.231	0.919
Rplp2	Uba52	5049776	5046917	10116.ENSRNOP00000038214	10116.ENSRNOP00000027073	0	0	0	0	0.618	0.749	0	0.23	0.919
Tceb1	Dcun1d3	5059457	5043926	10116.ENSRNOP00000067410	10116.ENSRNOP00000019167	0	0	0	0	0.063	0	0.9	0.211	0.919
Rps14	Rpl9	5054455	5048515	10116.ENSRNOP00000056260	10116.ENSRNOP00000032635	0.07	0	0.248	0	0.753	0.534	0	0.15	0.919
Eif4h	Rps12	5051128	5045022	10116.ENSRNOP00000043254	10116.ENSRNOP00000022184	0	0	0	0	0.083	0.194	0.9	0	0.919
Ncbp1	Zc3h8	5049893	5045657	10116.ENSRNOP00000038713	10116.ENSRNOP00000023845	0	0	0	0	0.063	0.138	0.9	0.12	0.919
Rab14	Rab8a	5046342	5044477	10116.ENSRNOP00000025649	10116.ENSRNOP00000020748	0	0	0.442	0.903	0.064	0.114	0.9	0.744	0.919
Eif2s2	Rps12	5045638	5045022	10116.ENSRNOP00000023786	10116.ENSRNOP00000022184	0	0	0	0	0.156	0.126	0.9	0	0.919
Rps4x	Rpl3	5059880	5055630	10116.ENSRNOP00000067969	10116.ENSRNOP00000060662	0.086	0	0.316	0	0.577	0.62	0	0.322	0.919
Rpl3	Rpl35a	5055630	5054353	10116.ENSRNOP00000060662	10116.ENSRNOP00000055825	0	0	0	0	0.524	0.596	0.54	0.184	0.918
Ncbp1	Paf1	5049893	5046801	10116.ENSRNOP00000038713	10116.ENSRNOP00000026778	0	0	0	0	0.139	0.131	0.9	0	0.918
Rps25	Rplp1	5048636	5042729	10116.ENSRNOP00000033144	10116.ENSRNOP00000015893	0	0	0	0	0.593	0.615	0	0.522	0.918
Arhgap9	Rhobtb2	5054079	5045669	10116.ENSRNOP00000054641	10116.ENSRNOP00000023872	0	0	0	0	0.05	0.162	0.9	0.098	0.918
Ncbp1	Etf1	5049893	5046645	10116.ENSRNOP00000038713	10116.ENSRNOP00000026398	0	0	0	0	0.165	0	0.9	0.102	0.918
Nme3	Nme1	5044815	5038468	10116.ENSRNOP00000021650	10116.ENSRNOP00000003658	0	0	0.449	0.97	0.064	0.181	0.9	0.526	0.918
Gata3	Atf2	5046550	5038012	10116.ENSRNOP00000026187	10116.ENSRNOP00000002174	0	0	0	0	0.063	0.132	0.9	0.119	0.918
Uba52	Atxn3	5046917	5039788	10116.ENSRNOP00000027073	10116.ENSRNOP00000007505	0	0	0	0	0	0.917	0	0.043	0.917
Wdr12	Nsa2	5045528	5045006	10116.ENSRNOP00000023463	10116.ENSRNOP00000022138	0	0	0	0	0.576	0.474	0.54	0.288	0.917
Apba1	Syn1	5044258	5042145	10116.ENSRNOP00000020123	10116.ENSRNOP00000014250	0	0	0	0	0.179	0	0.9	0.072	0.917
Tceb1	Tcea1	5059457	5040961	10116.ENSRNOP00000067410	10116.ENSRNOP00000010893	0	0	0	0	0.154	0	0.9	0.106	0.917
Rpl9	Rplp1	5048515	5042729	10116.ENSRNOP00000032635	10116.ENSRNOP00000015893	0	0	0	0	0.743	0.589	0	0.282	0.917
Rps13	Eif5	5049430	5041947	10116.ENSRNOP00000036690	10116.ENSRNOP00000013695	0	0	0	0	0.086	0	0.9	0.158	0.916
Cx3cl1	Adora1	5045002	5038789	10116.ENSRNOP00000022128	10116.ENSRNOP00000004602	0	0	0	0	0.105	0	0.9	0.144	0.916
Rps24	Uba52	5055202	5046917	10116.ENSRNOP00000059382	10116.ENSRNOP00000027073	0.102	0	0	0	0.6	0.738	0	0.22	0.916
Rab14	Rab11a	5046342	5042618	10116.ENSRNOP00000025649	10116.ENSRNOP00000015598	0	0	0.439	0.916	0.12	0	0.9	0.649	0.916
Tceb1	Polr2g	5059457	5046605	10116.ENSRNOP00000067410	10116.ENSRNOP00000026313	0	0	0	0	0.124	0	0.9	0.114	0.915
Ube2i	Thra	5045882	5041474	10116.ENSRNOP00000024406	10116.ENSRNOP00000012340	0	0	0	0	0	0.181	0.9	0.054	0.915
Rps24	Rplp1	5055202	5042729	10116.ENSRNOP00000059382	10116.ENSRNOP00000015893	0	0	0	0	0.583	0.609	0	0.522	0.915
Arhgap20	Rhobtb2	5048831	5045669	10116.ENSRNOP00000034071	10116.ENSRNOP00000023872	0	0	0	0	0.08	0.151	0.9	0.049	0.915
Sumo1	Rxra	5044974	5041671	10116.ENSRNOP00000022048	10116.ENSRNOP00000012892	0	0	0	0	0.05	0.135	0.9	0.09	0.915
F2r	Arrb1	5058039	5051878	10116.ENSRNOP00000065624	10116.ENSRNOP00000046069	0	0	0	0	0	0	0.9	0.193	0.915
Gpr17	Adora1	5048380	5038789	10116.ENSRNOP00000032046	10116.ENSRNOP00000004602	0	0	0	0	0.1	0	0.9	0.121	0.914
Rps13	Csnk1e	5049430	5043569	10116.ENSRNOP00000036690	10116.ENSRNOP00000018126	0	0	0	0	0	0	0.9	0.181	0.914
Tceb1	Arih2	5059457	5052901	10116.ENSRNOP00000067410	10116.ENSRNOP00000050012	0	0	0	0	0.049	0.114	0.9	0.11	0.914
Gtf2h2	Xrcc1	5054827	5046909	10116.ENSRNOP00000057895	10116.ENSRNOP00000027057	0	0	0	0	0.047	0	0.9	0.175	0.914
Ube2i	Thrb	5045882	5040175	10116.ENSRNOP00000024406	10116.ENSRNOP00000008752	0	0	0	0	0	0.181	0.9	0.043	0.914
Dctpp1	Nme1	5045743	5038468	10116.ENSRNOP00000024074	10116.ENSRNOP00000003658	0	0	0	0	0.18	0	0.9	0	0.914
Polr2g	Snapc3	5046605	5042503	10116.ENSRNOP00000026313	10116.ENSRNOP00000015254	0	0	0	0	0.049	0	0.9	0.169	0.914
Rps24	Rps29	5055202	5050429	10116.ENSRNOP00000059382	10116.ENSRNOP00000040703	0	0	0	0	0.525	0.652	0	0.519	0.913
Hk2	Pmm1	5040192	5039681	10116.ENSRNOP00000008813	10116.ENSRNOP00000007164	0	0	0	0	0.063	0	0.9	0.148	0.913
Uqcrq	Cox7a2	5057601	5055543	10116.ENSRNOP00000065074	10116.ENSRNOP00000060398	0	0	0	0	0.74	0.482	0	0.406	0.913
Ube2j2	Ube4a	5046791	5044694	10116.ENSRNOP00000026752	10116.ENSRNOP00000021321	0	0	0	0	0	0	0.9	0.173	0.913
Sumo1	Pom121	5044974	5037946	10116.ENSRNOP00000022048	10116.ENSRNOP00000001968	0	0	0	0	0	0	0.9	0.172	0.913
Uqcrh	Ndufb4	5043060	5038473	10116.ENSRNOP00000016751	10116.ENSRNOP00000003674	0	0	0	0	0.705	0.609	0	0.307	0.913
Ube2i	Vhl	5045882	5041958	10116.ENSRNOP00000024406	10116.ENSRNOP00000013727	0	0	0	0	0	0.067	0.9	0.151	0.913
Eif4h	Eif2s2	5051128	5045638	10116.ENSRNOP00000043254	10116.ENSRNOP00000023786	0	0	0	0	0.1	0	0.9	0.115	0.913
Cox4i1	Uqcrh	5045724	5043060	10116.ENSRNOP00000024033	10116.ENSRNOP00000016751	0	0	0	0	0.682	0	0.54	0.458	0.913
Arih2	Ube2f	5052901	5046905	10116.ENSRNOP00000050012	10116.ENSRNOP00000027050	0	0	0	0	0.05	0	0.9	0.163	0.913
Tceb1	Ube4a	5059457	5044694	10116.ENSRNOP00000067410	10116.ENSRNOP00000021321	0	0	0	0	0.064	0	0.9	0.152	0.913
Arih2	Stub1	5052901	5046852	10116.ENSRNOP00000050012	10116.ENSRNOP00000026921	0	0	0	0	0.086	0	0.9	0.126	0.913
Carm1	Rxra	5050984	5041671	10116.ENSRNOP00000042739	10116.ENSRNOP00000012892	0	0	0	0	0.063	0.067	0.9	0.13	0.913
Srsf11	Ddx39a	5051112	5050417	10116.ENSRNOP00000043202	10116.ENSRNOP00000040666	0	0	0	0	0.142	0.068	0.9	0.048	0.913
Rpl14	Rpl36a	5055953	5052640	10116.ENSRNOP00000061747	10116.ENSRNOP00000049014	0	0	0	0	0.572	0.603	0	0.53	0.913
P4hb	Igfbp5	5053439	5045552	10116.ENSRNOP00000051841	10116.ENSRNOP00000023530	0	0	0	0	0	0	0.9	0.159	0.912
U2af1l4	Isy1	5050608	5041915	10116.ENSRNOP00000041377	10116.ENSRNOP00000013571	0	0	0	0	0.152	0	0.9	0.054	0.912
Rab5b	Necap1	5054982	5041806	10116.ENSRNOP00000058595	10116.ENSRNOP00000013272	0	0	0	0	0.084	0	0.9	0.117	0.912
Ube2f	Ube4a	5046905	5044694	10116.ENSRNOP00000027050	10116.ENSRNOP00000021321	0	0	0	0	0	0	0.9	0.159	0.912
Ncbp1	Isy1	5049893	5041915	10116.ENSRNOP00000038713	10116.ENSRNOP00000013571	0	0	0	0	0.119	0.062	0.9	0.054	0.911
Stub1	Vhl	5046852	5041958	10116.ENSRNOP00000026921	10116.ENSRNOP00000013727	0	0	0	0	0	0	0.9	0.153	0.911
Rpl14	Rps24	5055953	5055202	10116.ENSRNOP00000061747	10116.ENSRNOP00000059382	0	0	0	0	0.629	0.607	0	0.441	0.911
Ncbp1	Tbp	5049893	5037965	10116.ENSRNOP00000038713	10116.ENSRNOP00000002038	0	0	0	0	0.063	0.114	0.9	0.055	0.911
Rps23	Eif5	5045083	5041947	10116.ENSRNOP00000022348	10116.ENSRNOP00000013695	0	0	0	0	0.086	0	0.9	0.111	0.911
Ncl	Utp3	5045990	5038847	10116.ENSRNOP00000024712	10116.ENSRNOP00000004787	0	0	0	0	0.14	0	0.9	0.049	0.911
Ube2f	Btbd1	5046905	5046721	10116.ENSRNOP00000027050	10116.ENSRNOP00000026595	0	0	0	0	0	0.153	0.9	0	0.911
Rps4x	LOC679683	5059880	5053664	10116.ENSRNOP00000067969	10116.ENSRNOP00000052873	0	0	0	0	0.556	0.782	0	0.162	0.911
Vgf	Igfbp5	5052906	5045552	10116.ENSRNOP00000050024	10116.ENSRNOP00000023530	0	0	0	0	0	0	0.9	0.153	0.911
Srek1	Srsf11	5052648	5051112	10116.ENSRNOP00000049050	10116.ENSRNOP00000043202	0	0	0	0.762	0.78	0.608	0	0	0.91
Tceb1	Psmc4	5059457	5046403	10116.ENSRNOP00000067410	10116.ENSRNOP00000025819	0	0	0	0	0.137	0	0.9	0.046	0.91
Hadhb	Eci1	5042278	5041279	10116.ENSRNOP00000014637	10116.ENSRNOP00000011784	0.068	0	0	0	0.579	0.652	0	0.418	0.91
Ube2i	Pom121	5045882	5037946	10116.ENSRNOP00000024406	10116.ENSRNOP00000001968	0	0	0	0	0.063	0	0.9	0.126	0.91
Ndufaf3	Ndufb4	5047000	5038473	10116.ENSRNOP00000027262	10116.ENSRNOP00000003674	0	0	0	0	0.143	0	0.9	0	0.91
Sumo1	Thra	5044974	5041474	10116.ENSRNOP00000022048	10116.ENSRNOP00000012340	0	0	0	0	0	0.135	0.9	0.044	0.91
Ncbp1	Rps13	5049893	5049430	10116.ENSRNOP00000038713	10116.ENSRNOP00000036690	0	0	0	0	0.091	0	0.9	0.093	0.91
Utp14a	Ncl	5053352	5045990	10116.ENSRNOP00000051553	10116.ENSRNOP00000024712	0	0	0	0	0.087	0	0.9	0.094	0.91
LOC679683	LOC684988	5053664	5047210	10116.ENSRNOP00000052873	10116.ENSRNOP00000027803	0	0	0	0	0.547	0.765	0	0.226	0.91
Rpl36	Rpl35a	5055066	5054353	10116.ENSRNOP00000058934	10116.ENSRNOP00000055825	0	0	0	0	0.417	0.481	0.54	0.435	0.91
Ppard	Dlat	5051852	5048573	10116.ENSRNOP00000045974	10116.ENSRNOP00000032890	0	0	0	0	0	0	0.9	0.139	0.91
Ncbp1	Gemin6	5049893	5049587	10116.ENSRNOP00000038713	10116.ENSRNOP00000037414	0	0	0	0	0.064	0	0.9	0.11	0.909
Sumo1	Thrb	5044974	5040175	10116.ENSRNOP00000022048	10116.ENSRNOP00000008752	0	0	0	0	0	0.135	0.9	0.043	0.909
Cdk4	Cbfb	5048988	5044096	10116.ENSRNOP00000034754	10116.ENSRNOP00000019656	0	0	0	0	0.05	0	0.9	0.121	0.909
Gal	Adora1	5044354	5038789	10116.ENSRNOP00000020425	10116.ENSRNOP00000004602	0	0	0	0	0	0.09	0.9	0.085	0.909
Stub1	Fbxo7	5046852	5039412	10116.ENSRNOP00000026921	10116.ENSRNOP00000006366	0	0	0	0	0	0	0.9	0.136	0.909
Tceb1	Stub1	5059457	5046852	10116.ENSRNOP00000067410	10116.ENSRNOP00000026921	0	0	0	0	0.046	0	0.9	0.124	0.909
Fyttd1	U2af1l4	5051403	5050608	10116.ENSRNOP00000044272	10116.ENSRNOP00000041377	0	0	0	0	0.05	0	0.9	0.121	0.909
Taf9b	Gtf2h2	5059950	5054827	10116.ENSRNOP00000068201	10116.ENSRNOP00000057895	0	0	0	0	0.064	0.045	0.9	0.111	0.909
Stub1	Btrc	5046852	5045120	10116.ENSRNOP00000026921	10116.ENSRNOP00000022426	0	0	0	0	0	0	0.9	0.13	0.909
Ikbkg	Irf3	5053730	5047203	10116.ENSRNOP00000053114	10116.ENSRNOP00000027786	0	0	0	0	0	0	0.8	0.568	0.909
Etf1	Casc3	5046645	5041779	10116.ENSRNOP00000026398	10116.ENSRNOP00000013204	0	0	0	0	0.061	0	0.9	0.112	0.909
U2af1l4	Chtop	5050608	5040799	10116.ENSRNOP00000041377	10116.ENSRNOP00000010455	0	0	0	0	0.119	0	0.9	0.059	0.909
Ube2f	Btrc	5046905	5045120	10116.ENSRNOP00000027050	10116.ENSRNOP00000022426	0	0	0	0	0	0	0.9	0.13	0.909
Cox7a2	Cox4i1	5055543	5045724	10116.ENSRNOP00000060398	10116.ENSRNOP00000024033	0	0	0	0	0.622	0.42	0	0.618	0.909
Trappc1	Gorasp1	5053910	5045883	10116.ENSRNOP00000053911	10116.ENSRNOP00000024408	0	0	0	0	0	0.045	0.9	0.129	0.909
Gtf2h2	Ube2i	5054827	5045882	10116.ENSRNOP00000057895	10116.ENSRNOP00000024406	0	0	0	0	0.111	0.067	0.9	0	0.909
Gata3	Cbfb	5046550	5044096	10116.ENSRNOP00000026187	10116.ENSRNOP00000019656	0	0	0	0	0	0	0.9	0.134	0.909
Btrc	Fbxo7	5045120	5039412	10116.ENSRNOP00000022426	10116.ENSRNOP00000006366	0	0	0	0	0	0	0.9	0.13	0.909
Rab8a	Csnk1e	5044477	5043569	10116.ENSRNOP00000020748	10116.ENSRNOP00000018126	0	0	0	0	0.05	0.067	0.9	0.098	0.909
Mpv17l	Eci2	5049636	5044967	10116.ENSRNOP00000037647	10116.ENSRNOP00000022022	0	0	0	0	0.063	0	0.9	0.111	0.909
LOC679683	Eif5	5053664	5041947	10116.ENSRNOP00000052873	10116.ENSRNOP00000013695	0	0	0	0	0.136	0	0.9	0	0.909
M6pr	Vps52	5044329	5037456	10116.ENSRNOP00000020364	10116.ENSRNOP00000000549	0	0	0	0	0.046	0	0.9	0.127	0.909
Rab5b	M6pr	5054982	5044329	10116.ENSRNOP00000058595	10116.ENSRNOP00000020364	0	0	0	0	0	0	0.9	0.122	0.908
Gstk1	Eci2	5045055	5044967	10116.ENSRNOP00000022275	10116.ENSRNOP00000022022	0	0	0	0	0.101	0	0.9	0.065	0.908
Ncbp1	Polr2g	5049893	5046605	10116.ENSRNOP00000038713	10116.ENSRNOP00000026313	0	0	0	0	0.118	0	0.9	0	0.908
Srsf11	U2af1l4	5051112	5050608	10116.ENSRNOP00000043202	10116.ENSRNOP00000041377	0	0	0	0	0.064	0	0.9	0.104	0.908
Polr2g	Isy1	5046605	5041915	10116.ENSRNOP00000026313	10116.ENSRNOP00000013571	0	0	0	0	0.127	0	0.9	0	0.908
Taf9b	Polr2g	5059950	5046605	10116.ENSRNOP00000068201	10116.ENSRNOP00000026313	0	0	0	0	0.083	0	0.9	0.078	0.908
Ube2f	Vhl	5046905	5041958	10116.ENSRNOP00000027050	10116.ENSRNOP00000013727	0	0	0	0	0	0	0.9	0.121	0.908
Cs	Hadhb	5049027	5042278	10116.ENSRNOP00000034921	10116.ENSRNOP00000014637	0.076	0	0	0	0.103	0.044	0.8	0.51	0.908
Ncbp1	Rpl10a	5049893	5037475	10116.ENSRNOP00000038713	10116.ENSRNOP00000000603	0	0	0	0	0.102	0	0.9	0.066	0.908
LOC679683	Ncl	5053664	5045990	10116.ENSRNOP00000052873	10116.ENSRNOP00000024712	0	0	0	0	0.08	0	0.9	0.083	0.908
Vwa1	Igfbp5	5046057	5045552	10116.ENSRNOP00000024897	10116.ENSRNOP00000023530	0	0	0	0	0.097	0.069	0.9	0	0.908
Abi2	Pxn	5052898	5051310	10116.ENSRNOP00000050008	10116.ENSRNOP00000043928	0	0	0	0	0	0	0.9	0.12	0.908
P4hb	Vwa1	5053439	5046057	10116.ENSRNOP00000051841	10116.ENSRNOP00000024897	0	0	0	0	0	0.126	0.9	0	0.908
Arfrp1	Vps52	5043881	5037456	10116.ENSRNOP00000019038	10116.ENSRNOP00000000549	0	0	0	0	0.092	0.069	0.9	0	0.908
Ap2b1	M6pr	5060044	5044329	10116.ENSRNOP00000068516	10116.ENSRNOP00000020364	0	0	0	0	0.049	0	0.9	0.112	0.908
Fyttd1	Casc3	5051403	5041779	10116.ENSRNOP00000044272	10116.ENSRNOP00000013204	0	0	0	0	0	0	0.9	0.112	0.907
Fcgr3a	Sirpa	5051103	5039428	10116.ENSRNOP00000043183	10116.ENSRNOP00000006408	0	0	0	0	0.064	0	0.9	0.089	0.907
Rpl14	Ncbp1	5055953	5049893	10116.ENSRNOP00000061747	10116.ENSRNOP00000038713	0	0	0	0	0.104	0	0.9	0.048	0.907
Btbd1	Vhl	5046721	5041958	10116.ENSRNOP00000026595	10116.ENSRNOP00000013727	0	0	0	0	0	0	0.9	0.112	0.907
Rps24	Rpl36a	5055202	5052640	10116.ENSRNOP00000059382	10116.ENSRNOP00000049014	0	0	0	0	0.499	0.612	0	0.563	0.907
Fyttd1	Srsf11	5051403	5051112	10116.ENSRNOP00000044272	10116.ENSRNOP00000043202	0	0	0	0	0.114	0	0.9	0	0.907
LOC679683	RGD1566137	5053664	5050967	10116.ENSRNOP00000052873	10116.ENSRNOP00000042681	0.083	0	0	0	0.551	0.759	0	0.177	0.907
Gata3	Tle3	5046550	5043675	10116.ENSRNOP00000026187	10116.ENSRNOP00000018467	0	0	0	0	0.069	0	0.9	0.087	0.907
Eci3	Eci1	5052953	5041279	10116.ENSRNOP00000050206	10116.ENSRNOP00000011784	0	0	0.2	0	0.564	0.052	0	0.753	0.907
Stub1	Btbd1	5046852	5046721	10116.ENSRNOP00000026921	10116.ENSRNOP00000026595	0	0	0	0	0.063	0	0.9	0.088	0.907
Csf1	Igfbp5	5046180	5045552	10116.ENSRNOP00000025221	10116.ENSRNOP00000023530	0	0	0	0	0.049	0	0.9	0.108	0.907
Rpl14	Casc3	5055953	5041779	10116.ENSRNOP00000061747	10116.ENSRNOP00000013204	0	0	0	0	0	0	0.9	0.101	0.906
Pip4k2b	Tmem55b	5043519	5041789	10116.ENSRNOP00000017989	10116.ENSRNOP00000013225	0	0	0	0	0.063	0	0.9	0.086	0.906
Tceb1	Ncbp1	5059457	5049893	10116.ENSRNOP00000067410	10116.ENSRNOP00000038713	0	0	0	0	0.103	0	0.9	0	0.906
Rab5b	Mxd3	5054982	5044938	10116.ENSRNOP00000058595	10116.ENSRNOP00000021946	0	0	0	0	0	0.092	0.9	0.048	0.906
Kansl3	Ogt	5044554	5038814	10116.ENSRNOP00000020955	10116.ENSRNOP00000004692	0	0	0	0	0.063	0.069	0.9	0.057	0.906
Cdkn1b	Psmc4	5052947	5046403	10116.ENSRNOP00000050173	10116.ENSRNOP00000025819	0	0	0	0	0	0	0.9	0.106	0.906
Hnrpd	Polr2g	5051983	5046605	10116.ENSRNOP00000046491	10116.ENSRNOP00000026313	0	0	0	0	0.063	0	0.9	0.078	0.906
Cct2	Ggh	5047722	5040538	10116.ENSRNOP00000029234	10116.ENSRNOP00000009758	0	0	0	0	0.101	0	0.9	0	0.906
Tyrobp	Shc1	5047405	5047304	10116.ENSRNOP00000028284	10116.ENSRNOP00000028038	0	0	0	0	0	0	0.9	0.107	0.906
Carm1	Gata3	5050984	5046550	10116.ENSRNOP00000042739	10116.ENSRNOP00000026187	0	0	0	0	0	0.054	0.9	0.087	0.906
Ncl	Fcf1	5045990	5039380	10116.ENSRNOP00000024712	10116.ENSRNOP00000006297	0	0	0	0	0.064	0	0.9	0.078	0.906
Mvb12a	Snf8	5045886	5040248	10116.ENSRNOP00000024413	10116.ENSRNOP00000008964	0	0	0	0	0.064	0	0.9	0.086	0.906
P4hb	Csf1	5053439	5046180	10116.ENSRNOP00000051841	10116.ENSRNOP00000025221	0	0	0	0	0.063	0	0.9	0.079	0.906
Dvl1	Psmc4	5046659	5046403	10116.ENSRNOP00000026439	10116.ENSRNOP00000025819	0	0	0	0	0.062	0.062	0.9	0.065	0.906
Stub1	Ube2j2	5046852	5046791	10116.ENSRNOP00000026921	10116.ENSRNOP00000026752	0	0	0	0	0.063	0	0.9	0.076	0.905
Rab5b	Arrb1	5054982	5051878	10116.ENSRNOP00000058595	10116.ENSRNOP00000046069	0	0	0	0	0	0	0.9	0.091	0.905
Srsf11	Ncbp1	5051112	5049893	10116.ENSRNOP00000043202	10116.ENSRNOP00000038713	0	0	0	0	0.091	0	0.9	0	0.905
Dlat	Rxra	5048573	5041671	10116.ENSRNOP00000032890	10116.ENSRNOP00000012892	0	0	0	0	0	0	0.9	0.098	0.905
F2r	Gpr17	5058039	5048380	10116.ENSRNOP00000065624	10116.ENSRNOP00000032046	0	0	0	0.791	0	0	0.9	0.279	0.905
Csnk1e	Rab11a	5043569	5042618	10116.ENSRNOP00000018126	10116.ENSRNOP00000015598	0	0	0	0	0.064	0.07	0.9	0.043	0.905
Ube4a	Vhl	5044694	5041958	10116.ENSRNOP00000021321	10116.ENSRNOP00000013727	0	0	0	0	0	0	0.9	0.09	0.905
Gpr17	Gal	5048380	5044354	10116.ENSRNOP00000032046	10116.ENSRNOP00000020425	0	0	0	0	0.064	0	0.9	0.075	0.905
Rps24	Etf1	5055202	5046645	10116.ENSRNOP00000059382	10116.ENSRNOP00000026398	0	0	0	0	0.369	0.856	0	0	0.905
LOC679683	Ncbp1	5053664	5049893	10116.ENSRNOP00000052873	10116.ENSRNOP00000038713	0	0	0	0	0.093	0	0.9	0	0.905
Csnk1e	Utp3	5043569	5038847	10116.ENSRNOP00000018126	10116.ENSRNOP00000004787	0	0	0	0	0.063	0.068	0.9	0	0.905
Rpl3	Ncbp1	5055630	5049893	10116.ENSRNOP00000060662	10116.ENSRNOP00000038713	0	0	0	0	0.092	0	0.9	0	0.905
Crk	Pdgfa	5039427	5037868	10116.ENSRNOP00000006407	10116.ENSRNOP00000001775	0	0	0	0	0.047	0	0.9	0.086	0.905
RGD1566137	Uba52	5050967	5046917	10116.ENSRNOP00000042681	10116.ENSRNOP00000027073	0	0	0	0	0.569	0.76	0	0.158	0.905
Hmgn1	Xrcc1	5059475	5046909	10116.ENSRNOP00000067432	10116.ENSRNOP00000027057	0	0	0	0	0.05	0	0.9	0.081	0.905
Rps29	Rplp1	5050429	5042729	10116.ENSRNOP00000040703	10116.ENSRNOP00000015893	0	0	0	0	0.562	0.652	0	0.426	0.904
Gtf2h2	Ncbp1	5054827	5049893	10116.ENSRNOP00000057895	10116.ENSRNOP00000038713	0	0	0	0	0.088	0	0.9	0	0.904
Xrcc1	Tcea1	5046909	5040961	10116.ENSRNOP00000027057	10116.ENSRNOP00000010893	0	0	0	0	0.05	0	0.9	0.08	0.904
Ggh	Pdxk	5040538	5037802	10116.ENSRNOP00000009758	10116.ENSRNOP00000001589	0	0	0	0	0	0	0.9	0.083	0.904
Dcun1d3	Vhl	5043926	5041958	10116.ENSRNOP00000019167	10116.ENSRNOP00000013727	0	0	0	0	0	0.086	0.9	0	0.904
U2af1l4	Ncbp1	5050608	5049893	10116.ENSRNOP00000041377	10116.ENSRNOP00000038713	0	0	0	0	0.087	0	0.9	0	0.904
Insr	Atp6v0d1	5055460	5045578	10116.ENSRNOP00000060141	10116.ENSRNOP00000023606	0	0	0	0	0.063	0	0.9	0.063	0.904
Ncbp1	Rps12	5049893	5045022	10116.ENSRNOP00000038713	10116.ENSRNOP00000022184	0	0	0	0	0.064	0.05	0.9	0.057	0.904
Rps19	Rpl3	5058962	5055630	10116.ENSRNOP00000066808	10116.ENSRNOP00000060662	0	0	0	0	0.596	0.576	0	0.485	0.904
Polr2g	Sf3a2	5046605	5046556	10116.ENSRNOP00000026313	10116.ENSRNOP00000026202	0	0	0	0	0.08	0	0.9	0	0.904
Decr2	Rab11a	5047101	5042618	10116.ENSRNOP00000027518	10116.ENSRNOP00000015598	0	0	0	0	0	0.087	0.9	0	0.904
Arih2	Vhl	5052901	5041958	10116.ENSRNOP00000050012	10116.ENSRNOP00000013727	0	0	0	0	0	0	0.9	0.084	0.904
RT1-CE1	Tyrobp	5054799	5047405	10116.ENSRNOP00000057743	10116.ENSRNOP00000028284	0	0	0	0	0.048	0	0.9	0.074	0.904
Ncbp1	Rps23	5049893	5045083	10116.ENSRNOP00000038713	10116.ENSRNOP00000022348	0	0	0	0	0.082	0	0.9	0	0.904
Psmc4	Vhl	5046403	5041958	10116.ENSRNOP00000025819	10116.ENSRNOP00000013727	0	0	0	0	0	0.07	0.9	0.06	0.904
Dab2ip	Syngap1	5054550	5051341	10116.ENSRNOP00000056740	10116.ENSRNOP00000044041	0	0	0	0.934	0.063	0.05	0.9	0.22	0.904
Isy1	Tcea1	5041915	5040961	10116.ENSRNOP00000013571	10116.ENSRNOP00000010893	0	0	0	0	0.08	0	0.9	0	0.904
Adcy5	Adcy6	5051982	5043011	10116.ENSRNOP00000046488	10116.ENSRNOP00000016624	0	0	0	0.968	0.063	0	0.9	0.814	0.904
Rpl9	Rpl10a	5048515	5037475	10116.ENSRNOP00000032635	10116.ENSRNOP00000000603	0.065	0	0	0	0.806	0.457	0	0.139	0.904
Rabepk	Vps52	5046169	5037456	10116.ENSRNOP00000025194	10116.ENSRNOP00000000549	0	0	0	0	0.064	0	0.9	0.058	0.904
Ncbp1	Tcea1	5049893	5040961	10116.ENSRNOP00000038713	10116.ENSRNOP00000010893	0	0	0	0	0.08	0	0.9	0	0.904
Gtf2h2	Sumo1	5054827	5044974	10116.ENSRNOP00000057895	10116.ENSRNOP00000022048	0	0	0	0	0.063	0	0.9	0.066	0.904
Ube2j2	Btbd1	5046791	5046721	10116.ENSRNOP00000026752	10116.ENSRNOP00000026595	0	0	0	0	0.085	0	0.9	0	0.904
Nme4	Dctpp1	5047124	5045743	10116.ENSRNOP00000027593	10116.ENSRNOP00000024074	0	0	0	0	0.082	0	0.9	0	0.904
Uqcrq	Cox6b2	5057601	5049174	10116.ENSRNOP00000065074	10116.ENSRNOP00000035591	0	0	0	0	0.628	0.653	0	0.318	0.904
Gpr17	Cx3cl1	5048380	5045002	10116.ENSRNOP00000032046	10116.ENSRNOP00000022128	0	0	0	0	0.086	0	0.9	0.042	0.904
Mxd3	Rab11a	5044938	5042618	10116.ENSRNOP00000021946	10116.ENSRNOP00000015598	0	0	0	0	0	0.07	0.9	0.042	0.903
Pigu	Pgap1	5048590	5043512	10116.ENSRNOP00000032963	10116.ENSRNOP00000017967	0	0	0	0	0.05	0.069	0.9	0	0.903
Ncbp1	Rpl23	5049893	5039094	10116.ENSRNOP00000038713	10116.ENSRNOP00000005471	0	0	0	0	0.078	0	0.9	0	0.903
Cx3cl1	Gal	5045002	5044354	10116.ENSRNOP00000022128	10116.ENSRNOP00000020425	0	0	0	0	0	0	0.9	0.078	0.903
Utp14a	Csnk1e	5053352	5043569	10116.ENSRNOP00000051553	10116.ENSRNOP00000018126	0	0	0	0	0.063	0	0.9	0.055	0.903
Ube2f	Stub1	5046905	5046852	10116.ENSRNOP00000027050	10116.ENSRNOP00000026921	0	0	0	0	0.063	0	0.9	0.051	0.903
Rpl3	Casc3	5055630	5041779	10116.ENSRNOP00000060662	10116.ENSRNOP00000013204	0	0	0	0	0	0	0.9	0.077	0.903
Mxd3	Rab2a	5044938	5040110	10116.ENSRNOP00000021946	10116.ENSRNOP00000008522	0	0	0	0	0	0.07	0.9	0	0.903
Rab14	Mxd3	5046342	5044938	10116.ENSRNOP00000025649	10116.ENSRNOP00000021946	0	0	0	0	0	0.07	0.9	0	0.903
Pip5k1c	Tmem55b	5054820	5041789	10116.ENSRNOP00000057873	10116.ENSRNOP00000013225	0	0	0	0	0.063	0	0.9	0.048	0.903
F2r	Grpr	5058039	5039125	10116.ENSRNOP00000065624	10116.ENSRNOP00000005559	0	0	0	0.592	0	0.073	0.9	0.05	0.903
Tceb1	Btrc	5059457	5045120	10116.ENSRNOP00000067410	10116.ENSRNOP00000022426	0	0	0	0	0	0	0.9	0.077	0.903
Casc3	Chtop	5041779	5040799	10116.ENSRNOP00000013204	10116.ENSRNOP00000010455	0	0	0	0	0.063	0	0.9	0.048	0.903
U2af1l4	Polr2g	5050608	5046605	10116.ENSRNOP00000041377	10116.ENSRNOP00000026313	0	0	0	0	0.076	0	0.9	0	0.903
Vti1a	Arfrp1	5055075	5043881	10116.ENSRNOP00000058953	10116.ENSRNOP00000019038	0	0	0	0	0.05	0	0.9	0.065	0.903
Rbfox2	Ncbp1	5056504	5049893	10116.ENSRNOP00000063462	10116.ENSRNOP00000038713	0	0	0	0	0	0	0.9	0.065	0.902
Tceb1	Gtf2h2	5059457	5054827	10116.ENSRNOP00000067410	10116.ENSRNOP00000057895	0	0	0	0	0.063	0	0.9	0	0.902
Asah1	Ggh	5041866	5040538	10116.ENSRNOP00000013463	10116.ENSRNOP00000009758	0	0	0	0	0.064	0	0.9	0	0.902
Ncbp1	Rpl19	5049893	5039407	10116.ENSRNOP00000038713	10116.ENSRNOP00000006359	0	0	0	0	0.063	0	0.9	0	0.902
Gtf2h2	Isy1	5054827	5041915	10116.ENSRNOP00000057895	10116.ENSRNOP00000013571	0	0	0	0	0.064	0	0.9	0	0.902
M6pr	Necap1	5044329	5041806	10116.ENSRNOP00000020364	10116.ENSRNOP00000013272	0	0	0	0	0.063	0	0.9	0	0.902
Hmgn1	Polr2g	5059475	5046605	10116.ENSRNOP00000067432	10116.ENSRNOP00000026313	0	0	0	0	0.063	0	0.9	0	0.902
Xrcc1	Isy1	5046909	5041915	10116.ENSRNOP00000027057	10116.ENSRNOP00000013571	0	0	0	0	0.063	0	0.9	0	0.902
Btbd1	Btrc	5046721	5045120	10116.ENSRNOP00000026595	10116.ENSRNOP00000022426	0	0	0	0	0.064	0	0.9	0	0.902
Dync1li2	Nup107	5047802	5040338	10116.ENSRNOP00000029646	10116.ENSRNOP00000009203	0	0	0	0	0.063	0	0.9	0	0.902
Srsf11	Chtop	5051112	5040799	10116.ENSRNOP00000043202	10116.ENSRNOP00000010455	0	0	0	0	0.063	0	0.9	0	0.902
Aldoart2	Asah1	5050613	5041866	10116.ENSRNOP00000041393	10116.ENSRNOP00000013463	0	0	0	0	0	0	0.9	0.066	0.902
Arih2	Btrc	5052901	5045120	10116.ENSRNOP00000050012	10116.ENSRNOP00000022426	0	0	0	0	0.063	0	0.9	0	0.902
Nudc	Nup107	5040598	5040338	10116.ENSRNOP00000009933	10116.ENSRNOP00000009203	0	0	0	0	0.064	0	0.9	0	0.902
Btrc	Dcun1d3	5045120	5043926	10116.ENSRNOP00000022426	10116.ENSRNOP00000019167	0	0	0	0	0.063	0	0.9	0	0.902
Cbx6	Cbfb	5055822	5044096	10116.ENSRNOP00000061325	10116.ENSRNOP00000019656	0	0	0	0	0.062	0	0.9	0	0.902
Gemin6	Nup107	5049587	5040338	10116.ENSRNOP00000037414	10116.ENSRNOP00000009203	0	0	0	0	0.064	0	0.9	0	0.902
Xrcc1	Polr2g	5046909	5046605	10116.ENSRNOP00000027057	10116.ENSRNOP00000026313	0	0	0	0	0.063	0	0.9	0	0.902
Zc3h8	Tbp	5045657	5037965	10116.ENSRNOP00000023845	10116.ENSRNOP00000002038	0	0	0	0	0.069	0	0.9	0	0.902
Zc3h8	Snapc3	5045657	5042503	10116.ENSRNOP00000023845	10116.ENSRNOP00000015254	0	0	0	0	0.064	0	0.9	0	0.902
Srsf11	Polr2g	5051112	5046605	10116.ENSRNOP00000043202	10116.ENSRNOP00000026313	0	0	0	0	0.064	0	0.9	0	0.902
Srsf11	Isy1	5051112	5041915	10116.ENSRNOP00000043202	10116.ENSRNOP00000013571	0	0	0	0	0.064	0	0.9	0	0.902
P4hb	Vgf	5053439	5052906	10116.ENSRNOP00000051841	10116.ENSRNOP00000050024	0	0	0	0	0	0	0.9	0.065	0.902
Gtf2h2	Paf1	5054827	5046801	10116.ENSRNOP00000057895	10116.ENSRNOP00000026778	0	0	0	0	0.063	0	0.9	0	0.902
Ube4a	Fbxo7	5044694	5039412	10116.ENSRNOP00000021321	10116.ENSRNOP00000006366	0	0	0	0	0.064	0	0.9	0	0.902
Abi2	Fcgr3a	5052898	5051103	10116.ENSRNOP00000050008	10116.ENSRNOP00000043183	0	0	0	0	0.063	0	0.9	0	0.902
Fcgr3a	Crk	5051103	5039427	10116.ENSRNOP00000043183	10116.ENSRNOP00000006407	0	0	0	0	0	0.067	0.9	0	0.902
Vgf	Vwa1	5052906	5046057	10116.ENSRNOP00000050024	10116.ENSRNOP00000024897	0	0	0	0	0.063	0	0.9	0	0.902
Csnk1e	Fcf1	5043569	5039380	10116.ENSRNOP00000018126	10116.ENSRNOP00000006297	0	0	0	0	0.064	0	0.9	0	0.902
Srsf11	Sf3a2	5051112	5046556	10116.ENSRNOP00000043202	10116.ENSRNOP00000026202	0	0	0	0	0.064	0	0.9	0	0.902
Polr2g	Zc3h8	5046605	5045657	10116.ENSRNOP00000026313	10116.ENSRNOP00000023845	0	0	0	0	0.063	0	0.9	0	0.902
Tceb1	Ube2j2	5059457	5046791	10116.ENSRNOP00000067410	10116.ENSRNOP00000026752	0	0	0	0	0.063	0	0.9	0	0.902
Casc3	Pom121	5041779	5037946	10116.ENSRNOP00000013204	10116.ENSRNOP00000001968	0	0	0	0	0.063	0	0.9	0	0.902
Polr2g	Snrnp35	5046605	5037726	10116.ENSRNOP00000026313	10116.ENSRNOP00000001402	0	0	0	0	0.064	0	0.9	0	0.902
Serpinb3	Cct2	5052018	5047722	10116.ENSRNOP00000046632	10116.ENSRNOP00000029234	0	0	0	0	0.063	0	0.9	0	0.902
Ptges3l1	Tle3	5054254	5043675	10116.ENSRNOP00000055283	10116.ENSRNOP00000018467	0	0	0	0	0.064	0	0.9	0	0.902
Btrc	Ube4a	5045120	5044694	10116.ENSRNOP00000022426	10116.ENSRNOP00000021321	0	0	0	0	0.064	0	0.9	0	0.902
Cbfb	Smarca2	5044096	5043057	10116.ENSRNOP00000019656	10116.ENSRNOP00000016740	0	0	0	0	0.061	0	0.9	0	0.902
Vti1a	Rabepk	5055075	5046169	10116.ENSRNOP00000058953	10116.ENSRNOP00000025194	0	0	0	0	0.064	0	0.9	0	0.902
Srsf11	Casc3	5051112	5041779	10116.ENSRNOP00000043202	10116.ENSRNOP00000013204	0	0	0	0	0.064	0	0.9	0	0.902
Mpv17l	Gstk1	5049636	5045055	10116.ENSRNOP00000037647	10116.ENSRNOP00000022275	0	0	0	0	0.063	0	0.9	0	0.902
U2af1l4	Casc3	5050608	5041779	10116.ENSRNOP00000041377	10116.ENSRNOP00000013204	0	0	0	0	0.063	0	0.9	0	0.902
Dync1li2	Nudc	5047802	5040598	10116.ENSRNOP00000029646	10116.ENSRNOP00000009933	0	0	0	0	0	0	0.9	0.057	0.901
Tceb1	Fbxo7	5059457	5039412	10116.ENSRNOP00000067410	10116.ENSRNOP00000006366	0	0	0	0	0	0.054	0.9	0	0.901
Ube2j2	Fbxo7	5046791	5039412	10116.ENSRNOP00000026752	10116.ENSRNOP00000006366	0	0	0	0	0	0.055	0.9	0	0.901
Rpl24	Rps13	5057430	5049430	10116.ENSRNOP00000064870	10116.ENSRNOP00000036690	0	0	0	0	0.542	0.615	0	0.485	0.901
Ube2f	Fbxo7	5046905	5039412	10116.ENSRNOP00000027050	10116.ENSRNOP00000006366	0	0	0	0	0	0.049	0.9	0.048	0.901
Bambi	Acvr1b	5044878	5040393	10116.ENSRNOP00000021801	10116.ENSRNOP00000009345	0	0	0	0	0	0.167	0.8	0.457	0.901
Pde1b	Ak3	5053517	5044476	10116.ENSRNOP00000052147	10116.ENSRNOP00000020744	0	0	0	0	0.05	0	0.9	0.046	0.901
Btrc	Vhl	5045120	5041958	10116.ENSRNOP00000022426	10116.ENSRNOP00000013727	0	0	0	0	0	0	0.9	0.056	0.901
Arih2	Fbxo7	5052901	5039412	10116.ENSRNOP00000050012	10116.ENSRNOP00000006366	0	0	0	0	0	0	0.9	0	0.9
Arih2	Ube2j2	5052901	5046791	10116.ENSRNOP00000050012	10116.ENSRNOP00000026752	0	0	0	0	0	0	0.9	0	0.9
Psmc4	Btrc	5046403	5045120	10116.ENSRNOP00000025819	10116.ENSRNOP00000022426	0	0	0	0	0	0	0.9	0.046	0.9
Rps23	Casc3	5045083	5041779	10116.ENSRNOP00000022348	10116.ENSRNOP00000013204	0	0	0	0	0	0	0.9	0	0.9
Elf2	Cbfb	5052374	5044096	10116.ENSRNOP00000047984	10116.ENSRNOP00000019656	0	0	0	0	0.05	0	0.9	0	0.9
RT1-CE1	Mxd3	5054799	5044938	10116.ENSRNOP00000057743	10116.ENSRNOP00000021946	0	0	0	0	0	0	0.9	0	0.9
Rps12	Casc3	5045022	5041779	10116.ENSRNOP00000022184	10116.ENSRNOP00000013204	0	0	0	0	0	0	0.9	0	0.9
RT1-CE1	Fcgr3a	5054799	5051103	10116.ENSRNOP00000057743	10116.ENSRNOP00000043183	0	0	0	0	0.047	0	0.9	0	0.9
Shc1	Cd79b	5047304	5042761	10116.ENSRNOP00000028038	10116.ENSRNOP00000015977	0	0	0	0	0	0	0.9	0.047	0.9
Vgf	Csf1	5052906	5046180	10116.ENSRNOP00000050024	10116.ENSRNOP00000025221	0	0	0	0	0	0	0.9	0	0.9
Casc3	Rpl19	5041779	5039407	10116.ENSRNOP00000013204	10116.ENSRNOP00000006359	0	0	0	0	0	0	0.9	0	0.9
Rpl24	LOC684988	5057430	5047210	10116.ENSRNOP00000064870	10116.ENSRNOP00000027803	0	0	0	0	0.542	0.615	0	0.482	0.9
Serpinb3	Np4	5052018	5049483	10116.ENSRNOP00000046632	10116.ENSRNOP00000036962	0	0	0	0	0	0	0.9	0	0.9
Dcun1d3	Fbxo7	5043926	5039412	10116.ENSRNOP00000019167	10116.ENSRNOP00000006366	0	0	0	0	0.05	0	0.9	0	0.9
Rps23	Csnk1e	5045083	5043569	10116.ENSRNOP00000022348	10116.ENSRNOP00000018126	0	0	0	0	0	0	0.9	0	0.9
Acd	Mre11a	5054471	5041687	10116.ENSRNOP00000056334	10116.ENSRNOP00000012940	0	0	0	0	0	0	0.9	0	0.9
Rab14	Sirpa	5046342	5039428	10116.ENSRNOP00000025649	10116.ENSRNOP00000006408	0	0	0	0	0	0	0.9	0	0.9
Arrb1	Necap1	5051878	5041806	10116.ENSRNOP00000046069	10116.ENSRNOP00000013272	0	0	0	0	0.05	0	0.9	0	0.9
Trappc1	Serpinb3	5053910	5052018	10116.ENSRNOP00000053911	10116.ENSRNOP00000046632	0	0	0	0	0	0	0.9	0	0.9
Tyrobp	Mxd3	5047405	5044938	10116.ENSRNOP00000028284	10116.ENSRNOP00000021946	0	0	0	0	0	0	0.9	0	0.9
Vhl	Fbxo7	5041958	5039412	10116.ENSRNOP00000013727	10116.ENSRNOP00000006366	0	0	0	0	0	0	0.9	0	0.9
Np4	Pdxk	5049483	5037802	10116.ENSRNOP00000036962	10116.ENSRNOP00000001589	0	0	0	0	0	0	0.9	0	0.9
Dync1li2	Gorasp1	5047802	5045883	10116.ENSRNOP00000029646	10116.ENSRNOP00000024408	0	0	0	0	0	0	0.9	0	0.9
Ube2j2	Vhl	5046791	5041958	10116.ENSRNOP00000026752	10116.ENSRNOP00000013727	0	0	0	0	0	0	0.9	0	0.9
Csf1	Vwa1	5046180	5046057	10116.ENSRNOP00000025221	10116.ENSRNOP00000024897	0	0	0	0	0	0	0.9	0	0.9
Casc3	Nup107	5041779	5040338	10116.ENSRNOP00000013204	10116.ENSRNOP00000009203	0	0	0	0	0.05	0	0.9	0	0.9
Serpinb3	Ggh	5052018	5040538	10116.ENSRNOP00000046632	10116.ENSRNOP00000009758	0	0	0	0	0	0	0.9	0	0.9
Trappc1	Ggh	5053910	5040538	10116.ENSRNOP00000053911	10116.ENSRNOP00000009758	0	0	0	0	0	0	0.9	0	0.9
Rab5b	Sirpa	5054982	5039428	10116.ENSRNOP00000058595	10116.ENSRNOP00000006408	0	0	0	0	0	0	0.9	0	0.9
Trappc1	Np4	5053910	5049483	10116.ENSRNOP00000053911	10116.ENSRNOP00000036962	0	0	0	0	0	0	0.9	0	0.9
Aldoart2	Ggh	5050613	5040538	10116.ENSRNOP00000041393	10116.ENSRNOP00000009758	0	0	0	0	0	0	0.9	0	0.9
Nrn1	Fcgr3a	5059016	5051103	10116.ENSRNOP00000066878	10116.ENSRNOP00000043183	0	0	0	0	0	0	0.9	0	0.9
Cbx6	Mapkapk3	5055822	5044237	10116.ENSRNOP00000061325	10116.ENSRNOP00000020065	0	0	0	0	0	0	0.9	0	0.9
Ncbp1	Snapc3	5049893	5042503	10116.ENSRNOP00000038713	10116.ENSRNOP00000015254	0	0	0	0	0	0	0.9	0	0.9
LOC679683	Casc3	5053664	5041779	10116.ENSRNOP00000052873	10116.ENSRNOP00000013204	0	0	0	0	0	0	0.9	0	0.9
Hmgn1	Gtf2h2	5059475	5054827	10116.ENSRNOP00000067432	10116.ENSRNOP00000057895	0	0	0	0	0	0	0.9	0	0.9
Casc3	Rpl10a	5041779	5037475	10116.ENSRNOP00000013204	10116.ENSRNOP00000000603	0	0	0	0	0	0	0.9	0	0.9
Rps12	Csnk1e	5045022	5043569	10116.ENSRNOP00000022184	10116.ENSRNOP00000018126	0	0	0	0	0.049	0	0.9	0	0.9
Rabepk	M6pr	5046169	5044329	10116.ENSRNOP00000025194	10116.ENSRNOP00000020364	0	0	0	0	0	0	0.9	0	0.9
Insr	Atp6v1g2	5055460	5037624	10116.ENSRNOP00000060141	10116.ENSRNOP00000001114	0	0	0	0	0	0	0.9	0	0.9
Hmgn1	Isy1	5059475	5041915	10116.ENSRNOP00000067432	10116.ENSRNOP00000013571	0	0	0	0	0	0	0.9	0	0.9
Ptges3l1	Dync1li2	5054254	5047802	10116.ENSRNOP00000055283	10116.ENSRNOP00000029646	0	0	0	0	0.05	0	0.9	0	0.9
Ube2j2	Btrc	5046791	5045120	10116.ENSRNOP00000026752	10116.ENSRNOP00000022426	0	0	0	0	0	0	0.9	0	0.9
Rab5b	Fcgr3a	5054982	5051103	10116.ENSRNOP00000058595	10116.ENSRNOP00000043183	0	0	0	0	0	0	0.9	0	0.9
Aldoart2	Pdgfa	5050613	5037868	10116.ENSRNOP00000041393	10116.ENSRNOP00000001775	0	0	0	0	0	0	0.9	0	0.9
Ncbp1	Pom121	5049893	5037946	10116.ENSRNOP00000038713	10116.ENSRNOP00000001968	0	0	0	0	0	0	0.9	0	0.9
Arih2	Btbd1	5052901	5046721	10116.ENSRNOP00000050012	10116.ENSRNOP00000026595	0	0	0	0	0	0	0.9	0	0.9
Casc3	Rpl23	5041779	5039094	10116.ENSRNOP00000013204	10116.ENSRNOP00000005471	0	0	0	0	0	0	0.9	0	0.9
Np4	Cct2	5049483	5047722	10116.ENSRNOP00000036962	10116.ENSRNOP00000029234	0	0	0	0	0	0	0.9	0	0.9
Rps13	Casc3	5049430	5041779	10116.ENSRNOP00000036690	10116.ENSRNOP00000013204	0	0	0	0	0	0	0.9	0	0.9
Trappc1	Cct2	5053910	5047722	10116.ENSRNOP00000053911	10116.ENSRNOP00000029234	0	0	0	0	0.05	0	0.9	0	0.9
Arrb1	M6pr	5051878	5044329	10116.ENSRNOP00000046069	10116.ENSRNOP00000020364	0	0	0	0	0	0	0.9	0	0.9
Rbfox2	Polr2g	5056504	5046605	10116.ENSRNOP00000063462	10116.ENSRNOP00000026313	0	0	0	0	0	0	0.9	0	0.9
Btbd1	Fbxo7	5046721	5039412	10116.ENSRNOP00000026595	10116.ENSRNOP00000006366	0	0	0	0	0	0	0.9	0	0.9
Mxd3	Sirpa	5044938	5039428	10116.ENSRNOP00000021946	10116.ENSRNOP00000006408	0	0	0	0	0	0	0.9	0	0.9
Gemin6	Pom121	5049587	5037946	10116.ENSRNOP00000037414	10116.ENSRNOP00000001968	0	0	0	0	0.05	0	0.9	0	0.9
Sufu	Psmc4	5046881	5046403	10116.ENSRNOP00000026987	10116.ENSRNOP00000025819	0	0	0	0	0	0	0.9	0	0.9
Btbd1	Dcun1d3	5046721	5043926	10116.ENSRNOP00000026595	10116.ENSRNOP00000019167	0	0	0	0	0	0	0.9	0	0.9
Gpr17	Grpr	5048380	5039125	10116.ENSRNOP00000032046	10116.ENSRNOP00000005559	0	0	0	0.601	0.047	0	0.9	0	0.9
Dctpp1	Nme3	5045743	5044815	10116.ENSRNOP00000024074	10116.ENSRNOP00000021650	0	0	0	0	0.05	0	0.9	0	0.9
Rab5b	RT1-CE1	5054982	5054799	10116.ENSRNOP00000058595	10116.ENSRNOP00000057743	0	0	0	0	0	0	0.9	0	0.9
Decr2	Rab8a	5047101	5044477	10116.ENSRNOP00000027518	10116.ENSRNOP00000020748	0	0	0	0	0	0	0.9	0	0.9
Np4	Ggh	5049483	5040538	10116.ENSRNOP00000036962	10116.ENSRNOP00000009758	0	0	0	0	0	0	0.9	0	0.9
Btbd1	Ube4a	5046721	5044694	10116.ENSRNOP00000026595	10116.ENSRNOP00000021321	0	0	0	0	0	0	0.9	0	0.9
Rab5b	Tyrobp	5054982	5047405	10116.ENSRNOP00000058595	10116.ENSRNOP00000028284	0	0	0	0	0	0	0.9	0.045	0.9
Actn4	Pdgfa	5047195	5037868	10116.ENSRNOP00000027773	10116.ENSRNOP00000001775	0	0	0	0	0	0	0.9	0.042	0.9
Ptges3l1	Gata3	5054254	5046550	10116.ENSRNOP00000055283	10116.ENSRNOP00000026187	0	0	0	0	0	0	0.9	0	0.9
Arih2	Ube4a	5052901	5044694	10116.ENSRNOP00000050012	10116.ENSRNOP00000021321	0	0	0	0	0	0	0.9	0	0.9
LOC679683	Csnk1e	5053664	5043569	10116.ENSRNOP00000052873	10116.ENSRNOP00000018126	0	0	0	0	0	0	0.9	0	0.9
Tceb1	Paf1	5059457	5046801	10116.ENSRNOP00000067410	10116.ENSRNOP00000026778	0	0	0	0	0	0	0.9	0	0.9
Mxd3	Rab8a	5044938	5044477	10116.ENSRNOP00000021946	10116.ENSRNOP00000020748	0	0	0	0	0	0	0.9	0	0.9
Uqcrq	Ndufb4	5057601	5038473	10116.ENSRNOP00000065074	10116.ENSRNOP00000003674	0	0	0	0	0.593	0.646	0	0.367	0.9
RT1-CE1	Sirpa	5054799	5039428	10116.ENSRNOP00000057743	10116.ENSRNOP00000006408	0	0	0	0	0	0	0.9	0	0.9
Fcgr3a	Mxd3	5051103	5044938	10116.ENSRNOP00000043183	10116.ENSRNOP00000021946	0	0	0	0	0	0	0.9	0	0.9
Rpl36	Rps3	5055066	5045692	10116.ENSRNOP00000058934	10116.ENSRNOP00000023935	0	0	0	0	0.583	0.588	0	0.462	0.899
Rpl14	Rplp2	5055953	5049776	10116.ENSRNOP00000061747	10116.ENSRNOP00000038214	0	0	0	0	0.571	0.608	0	0.436	0.897
Rps10	Rpl19	5055923	5039407	10116.ENSRNOP00000061642	10116.ENSRNOP00000006359	0	0	0	0	0.772	0.42	0	0.288	0.897
Coq7	Coq2	5045342	5038268	10116.ENSRNOP00000022988	10116.ENSRNOP00000002987	0	0	0	0	0.064	0	0	0.894	0.896
Uqcrq	Cox7a2l2	5057601	5049574	10116.ENSRNOP00000065074	10116.ENSRNOP00000037372	0	0	0	0	0.688	0.482	0	0.406	0.895
Rpl24	Rplp1	5057430	5042729	10116.ENSRNOP00000064870	10116.ENSRNOP00000015893	0	0	0	0	0.571	0.742	0	0.123	0.894
Ntrk2	Creb1	5051759	5043622	10116.ENSRNOP00000045635	10116.ENSRNOP00000018326	0	0	0	0	0	0.047	0	0.893	0.894
Rps19	Rplp2	5058962	5049776	10116.ENSRNOP00000066808	10116.ENSRNOP00000038214	0.067	0	0	0	0.465	0.494	0	0.632	0.894
Rpl24	Rpl14	5057430	5055953	10116.ENSRNOP00000064870	10116.ENSRNOP00000061747	0	0	0	0	0.558	0.644	0	0.384	0.894
LOC684988	Rplp1	5047210	5042729	10116.ENSRNOP00000027803	10116.ENSRNOP00000015893	0	0	0	0	0.573	0.638	0	0.364	0.893
Rpl3	Rps27	5055630	5045301	10116.ENSRNOP00000060662	10116.ENSRNOP00000022897	0	0	0	0	0.618	0.639	0	0.289	0.893
Rps14	Rplp2	5054455	5049776	10116.ENSRNOP00000056260	10116.ENSRNOP00000038214	0	0	0	0	0.575	0.615	0	0.394	0.892
Homer1	Grm5	5058316	5044980	10116.ENSRNOP00000065989	10116.ENSRNOP00000022059	0	0	0	0	0.072	0.507	0	0.783	0.892
Hmgcs1	Insig1	5045561	5040348	10116.ENSRNOP00000023554	10116.ENSRNOP00000009233	0	0	0	0	0.689	0	0	0.663	0.891
Rpl36a	Rpl9	5052640	5048515	10116.ENSRNOP00000049014	10116.ENSRNOP00000032635	0	0	0	0	0.721	0.422	0	0.376	0.89
Rpl3	Rps14	5055630	5054455	10116.ENSRNOP00000060662	10116.ENSRNOP00000056260	0.085	0	0	0	0.594	0.64	0	0.279	0.89
Rpl14	LOC684988	5055953	5047210	10116.ENSRNOP00000061747	10116.ENSRNOP00000027803	0	0	0	0	0.563	0.615	0	0.392	0.889
Rps19	Rpl19	5058962	5039407	10116.ENSRNOP00000066808	10116.ENSRNOP00000006359	0	0	0	0	0.732	0.415	0	0.344	0.888
Tyrobp	Spi1	5047405	5042890	10116.ENSRNOP00000028284	10116.ENSRNOP00000016306	0	0	0	0	0.712	0	0	0.628	0.888
Rpl36a	Rplp2	5052640	5049776	10116.ENSRNOP00000049014	10116.ENSRNOP00000038214	0	0	0	0	0.492	0.542	0	0.553	0.887
Rpl24	Rps14	5057430	5054455	10116.ENSRNOP00000064870	10116.ENSRNOP00000056260	0	0	0	0	0.559	0.643	0	0.344	0.887
Rps4x	Rplp1	5059880	5042729	10116.ENSRNOP00000067969	10116.ENSRNOP00000015893	0	0	0	0	0.562	0.652	0	0.32	0.887
Rpl14	Rps29	5055953	5050429	10116.ENSRNOP00000061747	10116.ENSRNOP00000040703	0.066	0	0	0	0.549	0.616	0	0.387	0.887
Rps2	Rplp1	5044035	5042729	10116.ENSRNOP00000019508	10116.ENSRNOP00000015893	0	0	0	0	0.471	0.589	0	0.525	0.887
Utp14a	Ftsj3	5053352	5041818	10116.ENSRNOP00000051553	10116.ENSRNOP00000013295	0	0	0	0	0.671	0.616	0	0.175	0.886
Yod1	Uba52	5048336	5046917	10116.ENSRNOP00000031836	10116.ENSRNOP00000027073	0	0	0	0	0.063	0.883	0	0.051	0.886
Rps10	Rplp1	5055923	5042729	10116.ENSRNOP00000061642	10116.ENSRNOP00000015893	0	0	0	0	0.574	0.61	0	0.369	0.886
Rps19	Rpl24	5058962	5057430	10116.ENSRNOP00000066808	10116.ENSRNOP00000064870	0	0	0	0	0.517	0.587	0	0.472	0.885
Rpl3	Rps2	5055630	5044035	10116.ENSRNOP00000060662	10116.ENSRNOP00000019508	0.068	0	0	0	0.475	0.522	0	0.563	0.884
Ndufs5	Cox6c	5049650	5042199	10116.ENSRNOP00000037699	10116.ENSRNOP00000014407	0	0	0	0	0.747	0	0	0.56	0.884
Eprs	Ncln	5048672	5039664	10116.ENSRNOP00000033323	10116.ENSRNOP00000007110	0	0	0	0	0.064	0.882	0	0	0.884
F2r	Gna13	5058039	5053469	10116.ENSRNOP00000065624	10116.ENSRNOP00000051938	0	0	0	0	0	0.181	0.8	0.354	0.884
Insr	Socs2	5055460	5041338	10116.ENSRNOP00000060141	10116.ENSRNOP00000011948	0	0	0	0	0	0.181	0.8	0.344	0.883
Ndufs6	Cox6c	5058869	5042199	10116.ENSRNOP00000066688	10116.ENSRNOP00000014407	0	0	0	0	0.729	0	0	0.587	0.883
Rpl14	Rps25	5055953	5048636	10116.ENSRNOP00000061747	10116.ENSRNOP00000033144	0	0	0	0	0.568	0.605	0	0.366	0.882
Rps19	LOC684988	5058962	5047210	10116.ENSRNOP00000066808	10116.ENSRNOP00000027803	0	0	0	0	0.499	0.501	0	0.566	0.882
Cs	Asl	5049027	5037658	10116.ENSRNOP00000034921	10116.ENSRNOP00000001211	0.084	0	0	0	0.064	0	0.8	0.388	0.881
Rplp2	Rps27	5049776	5045301	10116.ENSRNOP00000038214	10116.ENSRNOP00000022897	0	0	0	0	0.567	0.614	0	0.348	0.881
Rplp2	Rps3	5049776	5045692	10116.ENSRNOP00000038214	10116.ENSRNOP00000023935	0	0	0	0	0.557	0.588	0	0.401	0.881
Kcnj4	Kcnq2	5053695	5051247	10116.ENSRNOP00000053014	10116.ENSRNOP00000043732	0	0	0	0	0.242	0	0.8	0.278	0.881
Rpl24	Rps25	5057430	5048636	10116.ENSRNOP00000064870	10116.ENSRNOP00000033144	0	0	0	0	0.534	0.605	0	0.396	0.879
Rps24	Rpl23	5055202	5039094	10116.ENSRNOP00000059382	10116.ENSRNOP00000005471	0	0	0	0	0.641	0.635	0	0.153	0.879
Rpl3	Rps15	5055630	5049079	10116.ENSRNOP00000060662	10116.ENSRNOP00000035156	0.086	0	0	0	0.586	0.618	0	0.266	0.879
Rplp2	Rpl10a	5049776	5037475	10116.ENSRNOP00000038214	10116.ENSRNOP00000000603	0.081	0	0	0	0.556	0.604	0	0.342	0.879
Rpl3	LOC684988	5055630	5047210	10116.ENSRNOP00000060662	10116.ENSRNOP00000027803	0	0	0	0	0.581	0.615	0	0.314	0.879
Uba52	Uimc1	5046917	5045223	10116.ENSRNOP00000027073	10116.ENSRNOP00000022704	0	0	0	0	0	0.878	0	0	0.878
Rps19	Rpl9	5058962	5048515	10116.ENSRNOP00000066808	10116.ENSRNOP00000032635	0	0	0	0	0.745	0.418	0	0.243	0.878
Rps10	Rpl9	5055923	5048515	10116.ENSRNOP00000061642	10116.ENSRNOP00000032635	0	0	0	0	0.771	0.421	0	0.15	0.878
Taf9b	Tada2a	5059950	5038482	10116.ENSRNOP00000068201	10116.ENSRNOP00000003699	0	0	0	0	0.048	0.645	0.54	0.305	0.877
P4hb	Txn1	5053439	5042945	10116.ENSRNOP00000051841	10116.ENSRNOP00000016447	0	0	0	0	0.095	0.114	0	0.859	0.877
Larp7	Hexim1	5057826	5038678	10116.ENSRNOP00000065357	10116.ENSRNOP00000004272	0	0	0	0	0	0.632	0	0.676	0.875
Yipf5	Yif1b	5050680	5047276	10116.ENSRNOP00000041654	10116.ENSRNOP00000027987	0	0	0	0	0.086	0.451	0	0.772	0.875
Rps19	Rps29	5058962	5050429	10116.ENSRNOP00000066808	10116.ENSRNOP00000040703	0	0	0	0	0.466	0.547	0	0.528	0.875
Ssbp1	Tfam	5042853	5037540	10116.ENSRNOP00000016217	10116.ENSRNOP00000000753	0	0	0	0	0.168	0	0	0.855	0.875
Rpl14	Rps10	5055953	5055923	10116.ENSRNOP00000061747	10116.ENSRNOP00000061642	0	0	0	0	0.585	0.532	0	0.403	0.874
Dlg2	Llgl1	5053544	5039058	10116.ENSRNOP00000052268	10116.ENSRNOP00000005366	0	0	0	0	0	0.078	0.8	0.368	0.873
Cbfb	Cul5	5044096	5040982	10116.ENSRNOP00000019656	10116.ENSRNOP00000010956	0	0	0	0	0.05	0.822	0	0.311	0.873
Cct2	Uqcrh	5047722	5043060	10116.ENSRNOP00000029234	10116.ENSRNOP00000016751	0	0	0	0	0.856	0	0	0.158	0.873
Shank3	Shank1	5050529	5046515	10116.ENSRNOP00000041083	10116.ENSRNOP00000026100	0	0	0	0.847	0.063	0.284	0.8	0.875	0.873
Cox7a2l2	Uqcrh	5049574	5043060	10116.ENSRNOP00000037372	10116.ENSRNOP00000016751	0	0	0	0	0.627	0.315	0	0.54	0.872
Rpl24	Rps15	5057430	5049079	10116.ENSRNOP00000064870	10116.ENSRNOP00000035156	0	0	0	0	0.556	0.62	0	0.301	0.871
Rps24	Rpl19	5055202	5039407	10116.ENSRNOP00000059382	10116.ENSRNOP00000006359	0	0	0	0	0.558	0.57	0	0.372	0.87
Rpl35a	Rplp2	5054353	5049776	10116.ENSRNOP00000055825	10116.ENSRNOP00000038214	0	0	0	0	0.469	0.532	0	0.521	0.87
Rpl24	Rps12	5057430	5045022	10116.ENSRNOP00000064870	10116.ENSRNOP00000022184	0.045	0	0	0	0.52	0.603	0	0.372	0.87
Ednra	Gna13	5054170	5053469	10116.ENSRNOP00000054967	10116.ENSRNOP00000051938	0	0	0	0	0	0.199	0.8	0.255	0.87
Dlg4	Erbb4	5055096	5043965	10116.ENSRNOP00000059045	10116.ENSRNOP00000019283	0	0	0	0	0.076	0.42	0	0.778	0.87
Rps13	Rplp1	5049430	5042729	10116.ENSRNOP00000036690	10116.ENSRNOP00000015893	0	0	0	0	0.555	0.638	0	0.26	0.87
Rpl3	Rpl36a	5055630	5052640	10116.ENSRNOP00000060662	10116.ENSRNOP00000049014	0	0	0	0	0.526	0.6	0	0.363	0.869
Rpl3	Rps24	5055630	5055202	10116.ENSRNOP00000060662	10116.ENSRNOP00000059382	0	0	0	0	0.626	0.558	0	0.271	0.869
Rps29	Rplp2	5050429	5049776	10116.ENSRNOP00000040703	10116.ENSRNOP00000038214	0	0	0	0	0.532	0.603	0	0.353	0.869
Crem	Atf2	5056076	5038012	10116.ENSRNOP00000062109	10116.ENSRNOP00000002174	0	0	0	0	0.063	0.161	0.8	0.262	0.868
Rpl3	Rps29	5055630	5050429	10116.ENSRNOP00000060662	10116.ENSRNOP00000040703	0.084	0	0	0	0.538	0.599	0	0.316	0.868
Rps4x	Rpl24	5059880	5057430	10116.ENSRNOP00000067969	10116.ENSRNOP00000064870	0	0	0	0	0.557	0.62	0	0.279	0.868
Rpl36	LOC679683	5055066	5053664	10116.ENSRNOP00000058934	10116.ENSRNOP00000052873	0	0	0	0	0.536	0.653	0	0.241	0.867
Rps19	Rpl35a	5058962	5054353	10116.ENSRNOP00000066808	10116.ENSRNOP00000055825	0	0	0	0	0.366	0.439	0	0.656	0.867
Dars	Dars2	5038974	5038528	10116.ENSRNOP00000005127	10116.ENSRNOP00000003828	0.096	0	0	0.591	0.082	0.109	0.8	0.527	0.867
Rpl24	Rpl3	5057430	5055630	10116.ENSRNOP00000064870	10116.ENSRNOP00000060662	0	0	0	0	0.566	0.643	0	0.21	0.866
Cdkn1b	Tsc2	5052947	5042855	10116.ENSRNOP00000050173	10116.ENSRNOP00000016221	0	0	0	0	0	0.553	0	0.713	0.866
Rpl24	Rps27	5057430	5045301	10116.ENSRNOP00000064870	10116.ENSRNOP00000022897	0	0	0	0	0.549	0.644	0	0.228	0.865
Dlg4	Kif13b	5055096	5048484	10116.ENSRNOP00000059045	10116.ENSRNOP00000032499	0	0	0	0	0	0.809	0	0.324	0.865
Rps4x	Rpl14	5059880	5055953	10116.ENSRNOP00000067969	10116.ENSRNOP00000061747	0.067	0	0	0	0.602	0.619	0	0.161	0.865
Crem	Creb3l2	5056076	5043282	10116.ENSRNOP00000062109	10116.ENSRNOP00000017338	0	0	0	0	0	0.159	0.8	0.263	0.865
LOC679683	Rps25	5053664	5048636	10116.ENSRNOP00000052873	10116.ENSRNOP00000033144	0	0	0	0	0.538	0.652	0	0.226	0.864
Rps24	Rplp2	5055202	5049776	10116.ENSRNOP00000059382	10116.ENSRNOP00000038214	0	0	0	0	0.509	0.423	0	0.56	0.864
Gpx6	Gstk1	5054196	5045055	10116.ENSRNOP00000055070	10116.ENSRNOP00000022275	0.085	0	0	0	0	0	0.65	0.61	0.864
Ppard	Rxrb	5051852	5050374	10116.ENSRNOP00000045974	10116.ENSRNOP00000040499	0	0	0	0.698	0.063	0.264	0.8	0.323	0.863
Rplp2	Rps15	5049776	5049079	10116.ENSRNOP00000038214	10116.ENSRNOP00000035156	0	0	0	0	0.579	0.608	0	0.235	0.862
Pcyox1	Rims4	5045157	5042232	10116.ENSRNOP00000022532	10116.ENSRNOP00000014499	0	0	0	0	0	0	0	0.861	0.861
Rpl35a	Rps15	5054353	5049079	10116.ENSRNOP00000055825	10116.ENSRNOP00000035156	0	0	0	0	0.506	0.558	0	0.415	0.861
Rpl3	RGD1566137	5055630	5050967	10116.ENSRNOP00000060662	10116.ENSRNOP00000042681	0.083	0	0	0	0.554	0.613	0	0.229	0.861
Rpl36	Rplp2	5055066	5049776	10116.ENSRNOP00000058934	10116.ENSRNOP00000038214	0	0	0	0	0.537	0.585	0	0.331	0.86
Dlg4	Llgl1	5055096	5039058	10116.ENSRNOP00000059045	10116.ENSRNOP00000005366	0	0	0	0	0.063	0.078	0.8	0.287	0.86
Otud5	Uba52	5050091	5046917	10116.ENSRNOP00000039455	10116.ENSRNOP00000027073	0	0	0	0	0	0.859	0	0	0.859
Dlat	Hadhb	5048573	5042278	10116.ENSRNOP00000032890	10116.ENSRNOP00000014637	0.044	0	0	0	0.112	0	0.8	0.268	0.859
Timm17a	Grpel1	5040405	5040233	10116.ENSRNOP00000009398	10116.ENSRNOP00000008930	0	0	0	0	0.512	0.07	0.54	0.406	0.859
Drap1	Tbp	5048521	5037965	10116.ENSRNOP00000032674	10116.ENSRNOP00000002038	0	0	0	0	0.063	0.695	0	0.548	0.859
Plcg2	Gab2	5043756	5042911	10116.ENSRNOP00000018678	10116.ENSRNOP00000016361	0	0	0	0	0	0.148	0.8	0.235	0.858
Rps19	LOC679683	5058962	5053664	10116.ENSRNOP00000066808	10116.ENSRNOP00000052873	0	0	0	0	0.519	0.62	0	0.287	0.858
Creb1	Creb3l2	5043622	5043282	10116.ENSRNOP00000018326	10116.ENSRNOP00000017338	0	0	0	0.576	0	0.159	0.8	0.472	0.858
Rps15	Rpl9	5049079	5048515	10116.ENSRNOP00000035156	10116.ENSRNOP00000032635	0.074	0	0	0	0.618	0.479	0	0.324	0.858
Rps4x	Rpl9	5059880	5048515	10116.ENSRNOP00000067969	10116.ENSRNOP00000032635	0.074	0	0.257	0	0.481	0.484	0	0.35	0.858
Rps19	Rpl14	5058962	5055953	10116.ENSRNOP00000066808	10116.ENSRNOP00000061747	0	0	0	0	0.518	0.566	0	0.378	0.858
Rpl24	Rps3	5057430	5045692	10116.ENSRNOP00000064870	10116.ENSRNOP00000023935	0	0	0	0	0.557	0.62	0	0.226	0.858
Adcy5	Gnas	5051982	5048618	10116.ENSRNOP00000046488	10116.ENSRNOP00000033065	0	0	0	0	0	0	0.8	0.315	0.857
Uba52	Uchl5	5046917	5038878	10116.ENSRNOP00000027073	10116.ENSRNOP00000004881	0	0	0	0	0	0.85	0	0.087	0.857
AK6	Tbp	5048759	5037965	10116.ENSRNOP00000033728	10116.ENSRNOP00000002038	0	0	0	0	0	0.857	0	0	0.857
Rps24	Rpl10a	5055202	5037475	10116.ENSRNOP00000059382	10116.ENSRNOP00000000603	0	0	0	0	0.615	0.593	0	0.157	0.856
Rpl35a	LOC679683	5054353	5053664	10116.ENSRNOP00000055825	10116.ENSRNOP00000052873	0	0	0	0	0.527	0.636	0	0.233	0.856
Aurkaip1	Mrpl2	5046457	5045874	10116.ENSRNOP00000025952	10116.ENSRNOP00000024380	0	0	0	0	0.613	0.644	0	0	0.856
Rplp2	Rps13	5049776	5049430	10116.ENSRNOP00000038214	10116.ENSRNOP00000036690	0	0	0	0	0.55	0.604	0	0.251	0.855
Polr2g	Polr1c	5046605	5046389	10116.ENSRNOP00000026313	10116.ENSRNOP00000025787	0	0	0	0	0.186	0.603	0	0.585	0.854
Rpl24	Etf1	5057430	5046645	10116.ENSRNOP00000064870	10116.ENSRNOP00000026398	0	0	0	0	0.139	0.837	0	0	0.853
Nme4	Ak2	5047124	5037333	10116.ENSRNOP00000027593	10116.ENSRNOP00000000134	0.044	0	0	0	0.065	0.075	0.65	0.572	0.853
LOC679683	Rplp2	5053664	5049776	10116.ENSRNOP00000052873	10116.ENSRNOP00000038214	0	0	0	0	0.541	0.615	0	0.235	0.853
Rps4x	Rplp2	5059880	5049776	10116.ENSRNOP00000067969	10116.ENSRNOP00000038214	0	0	0	0	0.546	0.608	0	0.244	0.853
Sh2b1	Ntrk2	5058365	5051759	10116.ENSRNOP00000066048	10116.ENSRNOP00000045635	0	0	0	0	0	0.164	0.8	0.19	0.852
Rps14	RGD1566137	5054455	5050967	10116.ENSRNOP00000056260	10116.ENSRNOP00000042681	0.083	0	0	0	0.551	0.615	0	0.177	0.852
Rps10	Rpl3	5055923	5055630	10116.ENSRNOP00000061642	10116.ENSRNOP00000060662	0	0	0	0	0.536	0.588	0	0.287	0.851
Eprs	Polr1b	5048672	5046051	10116.ENSRNOP00000033323	10116.ENSRNOP00000024882	0	0	0	0	0.777	0.079	0	0.333	0.851
Cyp51	Insig1	5040616	5040348	10116.ENSRNOP00000009985	10116.ENSRNOP00000009233	0	0	0	0	0.707	0	0	0.509	0.85
Rpl14	Rps2	5055953	5044035	10116.ENSRNOP00000061747	10116.ENSRNOP00000019508	0.044	0	0	0	0.493	0.474	0	0.479	0.849
Ikbkg	Tbkbp1	5053730	5041524	10116.ENSRNOP00000053114	10116.ENSRNOP00000012461	0	0	0	0	0.063	0	0.8	0.263	0.849
Gga1	Bace1	5055241	5045259	10116.ENSRNOP00000059486	10116.ENSRNOP00000022796	0	0	0	0	0	0.181	0	0.822	0.848
Uba52	Rps2	5046917	5044035	10116.ENSRNOP00000027073	10116.ENSRNOP00000019508	0	0	0	0	0.565	0.613	0	0.172	0.848
Rps10	LOC679683	5055923	5053664	10116.ENSRNOP00000061642	10116.ENSRNOP00000052873	0	0	0	0	0.512	0.638	0	0.209	0.848
Prdx5	Txn1	5047574	5042945	10116.ENSRNOP00000028687	10116.ENSRNOP00000016447	0	0	0	0	0.115	0.522	0	0.668	0.847
Gstm3	Gstk1	5046396	5045055	10116.ENSRNOP00000025800	10116.ENSRNOP00000022275	0	0	0	0	0.05	0	0.65	0.577	0.847
Rpl24	Rpl10a	5057430	5037475	10116.ENSRNOP00000064870	10116.ENSRNOP00000000603	0	0	0	0	0.542	0.615	0	0.207	0.847
Rpl24	RGD1566137	5057430	5050967	10116.ENSRNOP00000064870	10116.ENSRNOP00000042681	0	0	0	0	0.542	0.615	0	0.207	0.847
LOC679683	Rpl9	5053664	5048515	10116.ENSRNOP00000052873	10116.ENSRNOP00000032635	0.07	0	0.238	0	0.468	0.607	0	0.122	0.846
RGD1566137	Rplp1	5050967	5042729	10116.ENSRNOP00000042681	10116.ENSRNOP00000015893	0.081	0	0	0	0.562	0.638	0	0.068	0.846
Rpl24	Rps23	5057430	5045083	10116.ENSRNOP00000064870	10116.ENSRNOP00000022348	0	0	0	0	0.549	0.62	0	0.169	0.845
Atp7b	Ccs	5054148	5046752	10116.ENSRNOP00000054880	10116.ENSRNOP00000026670	0.116	0	0	0	0	0.438	0	0.714	0.845
Rplp2	LOC684988	5049776	5047210	10116.ENSRNOP00000038214	10116.ENSRNOP00000027803	0	0	0	0	0.522	0.604	0	0.248	0.845
Rplp2	Rps23	5049776	5045083	10116.ENSRNOP00000038214	10116.ENSRNOP00000022348	0	0	0	0	0.554	0.609	0	0.178	0.844
Cs	Tfam	5049027	5037540	10116.ENSRNOP00000034921	10116.ENSRNOP00000000753	0	0	0	0	0.063	0	0	0.839	0.843
Rpl24	Rps29	5057430	5050429	10116.ENSRNOP00000064870	10116.ENSRNOP00000040703	0	0	0	0	0.555	0.62	0	0.143	0.842
Rpl24	Rpl23	5057430	5039094	10116.ENSRNOP00000064870	10116.ENSRNOP00000005471	0	0	0	0	0.55	0.615	0	0.165	0.842
Dlg4	Ntrk2	5055096	5051759	10116.ENSRNOP00000059045	10116.ENSRNOP00000045635	0.042	0	0	0	0.164	0.395	0	0.712	0.841
Cs	Hmgcs1	5049027	5045561	10116.ENSRNOP00000034921	10116.ENSRNOP00000023554	0	0	0	0	0.049	0	0.8	0.233	0.841
Rpl3	Rps25	5055630	5048636	10116.ENSRNOP00000060662	10116.ENSRNOP00000033144	0	0	0	0	0.583	0.605	0	0.112	0.841
Dlg2	Map1a	5053544	5043978	10116.ENSRNOP00000052268	10116.ENSRNOP00000019320	0	0	0	0	0.115	0.784	0	0.231	0.84
Eif2s2	Eif2b4	5045638	5039880	10116.ENSRNOP00000023786	10116.ENSRNOP00000007763	0	0	0	0	0.118	0.305	0.6	0.423	0.839
Rpl3	Rplp2	5055630	5049776	10116.ENSRNOP00000060662	10116.ENSRNOP00000038214	0	0	0	0	0.535	0.613	0	0.176	0.838
Rpl9	LOC684988	5048515	5047210	10116.ENSRNOP00000032635	10116.ENSRNOP00000027803	0	0	0	0	0.49	0.457	0	0.464	0.838
RGD1566137	Rps15	5050967	5049079	10116.ENSRNOP00000042681	10116.ENSRNOP00000035156	0.084	0	0	0	0.534	0.609	0	0.139	0.837
RGD1566137	Rps3	5050967	5045692	10116.ENSRNOP00000042681	10116.ENSRNOP00000023935	0.084	0	0	0	0.539	0.607	0	0.139	0.837
Polr1c	Rps3	5046389	5045692	10116.ENSRNOP00000025787	10116.ENSRNOP00000023935	0.098	0	0	0	0.585	0.518	0	0.206	0.837
Dlat	Hmgcs1	5048573	5045561	10116.ENSRNOP00000032890	10116.ENSRNOP00000023554	0	0	0	0	0.063	0	0.8	0.2	0.837
Shank3	Grm5	5050529	5044980	10116.ENSRNOP00000041083	10116.ENSRNOP00000022059	0	0	0	0	0.063	0.457	0	0.705	0.837
Gnas	Adcy6	5048618	5043011	10116.ENSRNOP00000033065	10116.ENSRNOP00000016624	0	0	0	0	0	0	0.8	0.22	0.837
Rpl24	Rpl36a	5057430	5052640	10116.ENSRNOP00000064870	10116.ENSRNOP00000049014	0	0	0	0	0.525	0.603	0	0.202	0.836
RGD1566137	Rps23	5050967	5045083	10116.ENSRNOP00000042681	10116.ENSRNOP00000022348	0.083	0	0	0	0.537	0.609	0	0.13	0.836
Rpl24	Rplp2	5057430	5049776	10116.ENSRNOP00000064870	10116.ENSRNOP00000038214	0	0	0	0	0.541	0.615	0	0.149	0.836
Mecp2	Creb1	5053749	5043622	10116.ENSRNOP00000053166	10116.ENSRNOP00000018326	0	0	0	0	0	0.302	0	0.771	0.834
RGD1566137	Rps29	5050967	5050429	10116.ENSRNOP00000042681	10116.ENSRNOP00000040703	0.082	0	0	0	0.535	0.609	0	0.126	0.834
Igf1r	Plcg2	5043960	5043756	10116.ENSRNOP00000019267	10116.ENSRNOP00000018678	0	0	0	0	0	0.185	0.8	0.068	0.834
RGD1566137	Rpl23	5050967	5039094	10116.ENSRNOP00000042681	10116.ENSRNOP00000005471	0.083	0	0	0	0.537	0.604	0	0.13	0.834
Rpl24	Rpl9	5057430	5048515	10116.ENSRNOP00000064870	10116.ENSRNOP00000032635	0	0	0	0	0.465	0.534	0	0.388	0.834
Os9	Uggt1	5051576	5044399	10116.ENSRNOP00000044914	10116.ENSRNOP00000020558	0	0	0	0	0.189	0.109	0	0.786	0.832
Crem	Creb1	5056076	5043622	10116.ENSRNOP00000062109	10116.ENSRNOP00000018326	0	0	0	0.959	0	0.169	0.8	0.869	0.832
RGD1566137	Rplp2	5050967	5049776	10116.ENSRNOP00000042681	10116.ENSRNOP00000038214	0.081	0	0	0	0.522	0.604	0	0.152	0.832
Pak1ip1	Ftsj3	5048726	5041818	10116.ENSRNOP00000033583	10116.ENSRNOP00000013295	0	0	0	0	0.768	0	0	0.306	0.832
LOC679683	Rpl36a	5053664	5052640	10116.ENSRNOP00000052873	10116.ENSRNOP00000049014	0	0	0	0	0.52	0.647	0	0.091	0.832
Eif4e	Eif4a2	5056576	5038104	10116.ENSRNOP00000063699	10116.ENSRNOP00000002484	0	0	0	0	0.139	0.422	0	0.689	0.832
Cox17	Ccs	5054464	5046752	10116.ENSRNOP00000056297	10116.ENSRNOP00000026670	0	0	0	0	0	0.07	0	0.825	0.831
Rpl24	Rps10	5057430	5055923	10116.ENSRNOP00000064870	10116.ENSRNOP00000061642	0	0	0	0	0.518	0.597	0	0.2	0.831
Ntrk2	Plcg2	5051759	5043756	10116.ENSRNOP00000045635	10116.ENSRNOP00000018678	0	0	0	0	0	0.185	0.8	0.047	0.831
Polr2g	Znrd1	5046605	5037588	10116.ENSRNOP00000026313	10116.ENSRNOP00000001012	0	0	0.208	0	0.135	0.421	0	0.622	0.83
Insr	Ogt	5055460	5038814	10116.ENSRNOP00000060141	10116.ENSRNOP00000004692	0	0	0	0	0.063	0.087	0.8	0.126	0.83
RGD1566137	Rps27	5050967	5045301	10116.ENSRNOP00000042681	10116.ENSRNOP00000022897	0	0	0	0	0.552	0.615	0	0.095	0.83
Rps24	RGD1566137	5055202	5050967	10116.ENSRNOP00000059382	10116.ENSRNOP00000042681	0	0	0	0	0.567	0.593	0	0.111	0.829
Slc7a5	Slc1a4	5046388	5039638	10116.ENSRNOP00000025784	10116.ENSRNOP00000007002	0.042	0	0	0	0.1	0.08	0	0.809	0.829
Rps13	Rpl9	5049430	5048515	10116.ENSRNOP00000036690	10116.ENSRNOP00000032635	0	0	0	0	0.448	0.457	0	0.472	0.828
Creb3l2	Atf2	5043282	5038012	10116.ENSRNOP00000017338	10116.ENSRNOP00000002174	0	0	0	0	0	0.065	0.8	0.159	0.828
Cox7a2	Timm8b	5055543	5041771	10116.ENSRNOP00000060398	10116.ENSRNOP00000013188	0	0	0	0	0.828	0	0	0	0.828
Rps29	Rpl9	5050429	5048515	10116.ENSRNOP00000040703	10116.ENSRNOP00000032635	0.067	0	0	0	0.424	0.46	0	0.478	0.828
Tceb1	Socs2	5059457	5041338	10116.ENSRNOP00000067410	10116.ENSRNOP00000011948	0	0	0	0	0	0.734	0	0.381	0.828
Ftsj3	Utp3	5041818	5038847	10116.ENSRNOP00000013295	10116.ENSRNOP00000004787	0	0	0	0	0.804	0	0	0.152	0.827
Timm23	Grpel1	5046858	5040233	10116.ENSRNOP00000026932	10116.ENSRNOP00000008930	0	0	0	0	0.518	0.111	0.54	0.228	0.827
Rpl14	Rpl9	5055953	5048515	10116.ENSRNOP00000061747	10116.ENSRNOP00000032635	0.045	0	0	0	0.515	0.49	0	0.35	0.826
Rpl24	Rpl36	5057430	5055066	10116.ENSRNOP00000064870	10116.ENSRNOP00000058934	0	0	0	0	0.531	0.608	0	0.13	0.826
RGD1566137	Rps13	5050967	5049430	10116.ENSRNOP00000042681	10116.ENSRNOP00000036690	0	0	0	0	0.534	0.605	0	0.126	0.825
Rpl14	RGD1566137	5055953	5050967	10116.ENSRNOP00000061747	10116.ENSRNOP00000042681	0	0	0	0	0.541	0.615	0	0.094	0.825
Pdp2	Pdk2	5042953	5039153	10116.ENSRNOP00000016462	10116.ENSRNOP00000005641	0	0	0	0	0.189	0.109	0	0.777	0.825
RGD1566137	LOC684988	5050967	5047210	10116.ENSRNOP00000042681	10116.ENSRNOP00000027803	0	0	0	0	0.534	0.605	0	0.126	0.825
Ndufs6	Ndufb4	5058869	5038473	10116.ENSRNOP00000066688	10116.ENSRNOP00000003674	0	0	0	0	0.331	0.62	0	0.363	0.824
Nme1	Ak2	5038468	5037333	10116.ENSRNOP00000003658	10116.ENSRNOP00000000134	0.044	0	0	0	0.086	0.165	0.65	0.418	0.824
Rplp2	Rpl23	5049776	5039094	10116.ENSRNOP00000038214	10116.ENSRNOP00000005471	0	0	0	0	0.548	0.605	0	0.095	0.824
Cox17	Atp7b	5054464	5054148	10116.ENSRNOP00000056297	10116.ENSRNOP00000054880	0	0	0	0	0.063	0	0	0.82	0.824
Crem	Crtc1	5056076	5048120	10116.ENSRNOP00000062109	10116.ENSRNOP00000030925	0	0	0	0	0.05	0.447	0.6	0.257	0.823
Il33	Il18	5044979	5041735	10116.ENSRNOP00000022056	10116.ENSRNOP00000013093	0	0	0	0	0.063	0	0	0.819	0.823
Nme4	Nme3	5047124	5044815	10116.ENSRNOP00000027593	10116.ENSRNOP00000021650	0	0	0.449	0.952	0.063	0.08	0.8	0.83	0.823
Dvl1	Bambi	5046659	5044878	10116.ENSRNOP00000026439	10116.ENSRNOP00000021801	0	0	0	0	0	0.14	0.8	0.058	0.823
Hibch	Cct2	5048379	5047722	10116.ENSRNOP00000032041	10116.ENSRNOP00000029234	0	0	0	0	0.821	0	0	0.049	0.822
Rps4x	RGD1566137	5059880	5050967	10116.ENSRNOP00000067969	10116.ENSRNOP00000042681	0	0	0	0	0.542	0.609	0	0.087	0.822
Gmds	Afap1	5045613	5040757	10116.ENSRNOP00000023691	10116.ENSRNOP00000010346	0	0	0	0	0	0	0	0.821	0.821
Atxn1	Atxn3	5045402	5039788	10116.ENSRNOP00000023140	10116.ENSRNOP00000007505	0	0	0	0	0	0	0	0.821	0.821
Zfp36l1	Zfp36l2	5053349	5039535	10116.ENSRNOP00000051546	10116.ENSRNOP00000006725	0	0	0	0.891	0.063	0	0.8	0.824	0.821
Rpl24	Rpl35a	5057430	5054353	10116.ENSRNOP00000064870	10116.ENSRNOP00000055825	0	0	0	0	0.528	0.597	0	0.126	0.819
Kif13b	Adap1	5048484	5037857	10116.ENSRNOP00000032499	10116.ENSRNOP00000001736	0	0	0	0	0.063	0.512	0	0.632	0.817
Mrpl2	Rpl23	5045874	5039094	10116.ENSRNOP00000024380	10116.ENSRNOP00000005471	0.084	0	0	0	0.408	0.599	0	0.255	0.816
Pak1ip1	Rrp15	5048726	5038376	10116.ENSRNOP00000033583	10116.ENSRNOP00000003359	0	0	0	0	0.693	0.275	0	0.243	0.816
Polr1b	Wdr12	5046051	5045528	10116.ENSRNOP00000024882	10116.ENSRNOP00000023463	0	0	0	0	0.816	0	0	0.042	0.816
Erbb4	Plcg2	5043965	5043756	10116.ENSRNOP00000019283	10116.ENSRNOP00000018678	0	0	0	0	0.061	0.413	0.6	0.266	0.816
Igf1r	Crk	5043960	5039427	10116.ENSRNOP00000019267	10116.ENSRNOP00000006407	0	0	0	0	0.063	0.23	0.6	0.437	0.815
Gna13	Igf1r	5053469	5043960	10116.ENSRNOP00000051938	10116.ENSRNOP00000019267	0	0	0	0	0.049	0.094	0.8	0.055	0.815
Rps10	Rplp2	5055923	5049776	10116.ENSRNOP00000061642	10116.ENSRNOP00000038214	0	0	0	0	0.504	0.486	0	0.332	0.815
Rps15	Polr1c	5049079	5046389	10116.ENSRNOP00000035156	10116.ENSRNOP00000025787	0.098	0	0	0	0.53	0.514	0	0.206	0.814
Gls	Eprs	5049774	5048672	10116.ENSRNOP00000038205	10116.ENSRNOP00000033323	0.084	0	0	0	0	0	0.8	0.07	0.814
Nos3	Ogt	5041726	5038814	10116.ENSRNOP00000013058	10116.ENSRNOP00000004692	0	0	0	0	0	0	0.8	0.111	0.814
LOC679683	Rps2	5053664	5044035	10116.ENSRNOP00000052873	10116.ENSRNOP00000019508	0.068	0	0	0	0.459	0.612	0	0.158	0.813
Rps2	Rpl10a	5044035	5037475	10116.ENSRNOP00000019508	10116.ENSRNOP00000000603	0.06	0	0	0	0.443	0.454	0	0.424	0.813
Ndufs6	Cox7a2	5058869	5055543	10116.ENSRNOP00000066688	10116.ENSRNOP00000060398	0	0	0	0	0.637	0	0	0.507	0.813
Ube2i	Txn1	5045882	5042945	10116.ENSRNOP00000024406	10116.ENSRNOP00000016447	0	0	0	0	0.063	0.806	0	0.05	0.812
Thra	Thrb	5041474	5040175	10116.ENSRNOP00000012340	10116.ENSRNOP00000008752	0	0	0	0.956	0.063	0	0.8	0.917	0.812
Dazap1	Msi1	5051866	5037772	10116.ENSRNOP00000046032	10116.ENSRNOP00000001532	0	0	0	0.781	0	0	0.8	0.287	0.811
Rplp2	Rps25	5049776	5048636	10116.ENSRNOP00000038214	10116.ENSRNOP00000033144	0	0	0	0	0.492	0.557	0	0.228	0.811
Gstk1	Gsta1	5045055	5043621	10116.ENSRNOP00000022275	10116.ENSRNOP00000018325	0	0	0	0	0.084	0	0.65	0.457	0.811
Rps24	Rpl9	5055202	5048515	10116.ENSRNOP00000059382	10116.ENSRNOP00000032635	0	0	0	0	0.535	0.421	0	0.354	0.811
Eprs	Polr1c	5048672	5046389	10116.ENSRNOP00000033323	10116.ENSRNOP00000025787	0.084	0.435	0	0	0.546	0.051	0	0.283	0.811
Socs2	Tceb2	5041338	5039605	10116.ENSRNOP00000011948	10116.ENSRNOP00000006892	0	0	0	0	0	0.587	0	0.56	0.81
Scn4b	Scn2b	5048664	5044886	10116.ENSRNOP00000033284	10116.ENSRNOP00000021819	0	0	0	0.706	0.109	0	0.72	0.91	0.809
Eprs	Etf1	5048672	5046645	10116.ENSRNOP00000033323	10116.ENSRNOP00000026398	0	0	0	0	0.668	0.451	0	0	0.809
Mrps22	Aurkaip1	5059274	5046457	10116.ENSRNOP00000067192	10116.ENSRNOP00000025952	0	0	0	0	0.163	0.781	0	0	0.809
Paics	Nudc	5055878	5040598	10116.ENSRNOP00000061495	10116.ENSRNOP00000009933	0	0	0	0	0.637	0	0	0.494	0.808
Dyx1c1	Lrrc6	5047820	5039704	10116.ENSRNOP00000029714	10116.ENSRNOP00000007250	0	0	0	0	0.119	0.051	0	0.789	0.808
Rxrb	Rxra	5050374	5041671	10116.ENSRNOP00000040499	10116.ENSRNOP00000012892	0	0	0	0.969	0.063	0	0.8	0.704	0.808
Rps24	Rpl36	5055202	5055066	10116.ENSRNOP00000059382	10116.ENSRNOP00000058934	0	0	0	0	0.552	0.485	0	0.231	0.807
Utp14a	Pes1	5053352	5039275	10116.ENSRNOP00000051553	10116.ENSRNOP00000005996	0	0	0	0	0.588	0.525	0	0.094	0.807
Gnas	Adcyap1r1	5048618	5042833	10116.ENSRNOP00000033065	10116.ENSRNOP00000016175	0	0	0	0	0.076	0	0.8	0	0.807
Dpm2	Gmds	5057634	5045613	10116.ENSRNOP00000065111	10116.ENSRNOP00000023691	0	0	0	0	0.063	0	0.8	0.049	0.806
Txn2	Glrx2	5055640	5054567	10116.ENSRNOP00000060694	10116.ENSRNOP00000056811	0.053	0	0	0	0.108	0.177	0	0.754	0.806
Gnas	Igf1r	5048618	5043960	10116.ENSRNOP00000033065	10116.ENSRNOP00000019267	0	0	0	0	0	0	0.8	0.074	0.806
Ikbkg	Uba52	5053730	5046917	10116.ENSRNOP00000053114	10116.ENSRNOP00000027073	0	0	0	0	0	0.806	0	0	0.806
Rpl36	RGD1566137	5055066	5050967	10116.ENSRNOP00000058934	10116.ENSRNOP00000042681	0	0	0	0	0.517	0.586	0	0.105	0.805
Gstm3	Nqo1	5046396	5043219	10116.ENSRNOP00000025800	10116.ENSRNOP00000017175	0	0	0	0	0.05	0	0	0.802	0.804
Sharpin	Spata2	5043540	5041569	10116.ENSRNOP00000018032	10116.ENSRNOP00000012604	0	0	0	0	0.063	0	0.8	0	0.804
Cyp4f18	Cyp4f6	5044798	5039395	10116.ENSRNOP00000021609	10116.ENSRNOP00000006335	0	0	0.449	0.977	0	0	0.8	0.586	0.804
Gabrb3	Hap1	5056027	5044415	10116.ENSRNOP00000061969	10116.ENSRNOP00000020603	0	0	0	0	0.063	0.452	0.6	0.16	0.804
Rpl3	Eprs	5055630	5048672	10116.ENSRNOP00000060662	10116.ENSRNOP00000033323	0.044	0	0	0	0.558	0.317	0	0.399	0.803
Mrps26	Aurkaip1	5047623	5046457	10116.ENSRNOP00000028828	10116.ENSRNOP00000025952	0	0	0	0	0.143	0.78	0	0	0.803
Cntnap1	Cntn2	5047096	5041419	10116.ENSRNOP00000027505	10116.ENSRNOP00000012190	0	0	0	0	0.178	0.162	0	0.735	0.802
Nlgn2	Lhfpl4	5053871	5040758	10116.ENSRNOP00000053713	10116.ENSRNOP00000010347	0	0	0	0	0.176	0	0	0.769	0.802
Eprs	Dars2	5048672	5038528	10116.ENSRNOP00000033323	10116.ENSRNOP00000003828	0.271	0	0	0	0.532	0	0	0.465	0.801
Rps13	LOC684988	5049430	5047210	10116.ENSRNOP00000036690	10116.ENSRNOP00000027803	0	0	0.449	0.985	0	0.8	0	0.266	0.801
Plcg2	Nos3	5043756	5041726	10116.ENSRNOP00000018678	10116.ENSRNOP00000013058	0	0	0	0	0	0	0.8	0.042	0.8
Rplp2	Rps12	5049776	5045022	10116.ENSRNOP00000038214	10116.ENSRNOP00000022184	0	0	0	0	0.492	0.504	0	0.269	0.8
Rbm39	rCG_37337	5055501	5046870	10116.ENSRNOP00000060273	10116.ENSRNOP00000026964	0	0	0	0.987	0	0.8	0	0	0.8
Cox7a2l2	Cox4i1	5049574	5045724	10116.ENSRNOP00000037372	10116.ENSRNOP00000024033	0	0	0	0	0.171	0.42	0	0.618	0.8
Uba52	Mrpl2	5046917	5045874	10116.ENSRNOP00000027073	10116.ENSRNOP00000024380	0	0	0	0	0.538	0.557	0	0.099	0.799
Timm17al1	Timm23	5057609	5046858	10116.ENSRNOP00000065084	10116.ENSRNOP00000026932	0	0	0	0	0.271	0.541	0	0.448	0.799
Eif4e	Eif4h	5056576	5051128	10116.ENSRNOP00000063699	10116.ENSRNOP00000043254	0	0	0	0	0.064	0.267	0.54	0.438	0.799
RGD1566137	Rps25	5050967	5048636	10116.ENSRNOP00000042681	10116.ENSRNOP00000033144	0	0	0	0	0.518	0.557	0	0.136	0.799
LOC684988	Rps2	5047210	5044035	10116.ENSRNOP00000027803	10116.ENSRNOP00000019508	0	0	0	0	0.398	0.455	0	0.435	0.798
Rplp2	Rps2	5049776	5044035	10116.ENSRNOP00000038214	10116.ENSRNOP00000019508	0	0	0	0	0.405	0.453	0	0.425	0.796
Polr1b	Ftsj3	5046051	5041818	10116.ENSRNOP00000024882	10116.ENSRNOP00000013295	0	0	0	0	0.795	0	0	0	0.795
Npr3	Nptxr	5046464	5038821	10116.ENSRNOP00000025966	10116.ENSRNOP00000004703	0	0	0	0	0	0	0	0.795	0.795
Rps14	Polr1c	5054455	5046389	10116.ENSRNOP00000056260	10116.ENSRNOP00000025787	0.095	0	0	0	0.523	0.483	0	0.191	0.795
LOC679683	Polr1c	5053664	5046389	10116.ENSRNOP00000052873	10116.ENSRNOP00000025787	0.095	0	0	0	0.523	0.483	0	0.191	0.795
Yod1	Ube4a	5048336	5044694	10116.ENSRNOP00000031836	10116.ENSRNOP00000021321	0	0	0	0	0	0.588	0	0.522	0.794
Rpl3	Wdr12	5055630	5045528	10116.ENSRNOP00000060662	10116.ENSRNOP00000023463	0	0	0	0	0.364	0.469	0	0.441	0.794
Mef2d	Cabin1	5050523	5037826	10116.ENSRNOP00000041061	10116.ENSRNOP00000001659	0	0	0	0	0.063	0.619	0	0.467	0.793
Hmgcs1	Dhcr24	5045561	5040408	10116.ENSRNOP00000023554	10116.ENSRNOP00000009402	0	0	0	0	0.527	0	0	0.58	0.793
Polr1c	Wdr12	5046389	5045528	10116.ENSRNOP00000025787	10116.ENSRNOP00000023463	0	0	0	0	0.793	0	0	0	0.793
Igf1r	Socs2	5043960	5041338	10116.ENSRNOP00000019267	10116.ENSRNOP00000011948	0	0	0	0	0	0.181	0	0.757	0.793
Prim1	RGD1306730	5056301	5047145	10116.ENSRNOP00000062827	10116.ENSRNOP00000027644	0	0	0	0	0.701	0	0	0.338	0.793
Rnf113a1	Slc2a13	5052328	5044628	10116.ENSRNOP00000047839	10116.ENSRNOP00000021153	0	0	0	0	0	0.79	0	0.056	0.793
Gpx6	Gstm3	5054196	5046396	10116.ENSRNOP00000055070	10116.ENSRNOP00000025800	0	0	0	0	0.063	0	0.65	0.416	0.792
Polr1b	Utp3	5046051	5038847	10116.ENSRNOP00000024882	10116.ENSRNOP00000004787	0	0	0	0	0.787	0.055	0	0	0.791
RGD1566137	Etf1	5050967	5046645	10116.ENSRNOP00000042681	10116.ENSRNOP00000026398	0.044	0	0	0	0.139	0.76	0	0.067	0.791
Polr2g	Polr1b	5046605	5046051	10116.ENSRNOP00000026313	10116.ENSRNOP00000024882	0	0	0	0	0.096	0.557	0	0.521	0.791
Pus1	Wdr12	5053852	5045528	10116.ENSRNOP00000053623	10116.ENSRNOP00000023463	0	0	0	0	0.625	0.197	0	0.363	0.791
Eprs	Qrsl1	5048672	5043828	10116.ENSRNOP00000033323	10116.ENSRNOP00000018891	0.144	0	0	0	0.138	0.471	0	0.53	0.791
Slc2a13	Isy1	5044628	5041915	10116.ENSRNOP00000021153	10116.ENSRNOP00000013571	0	0	0	0	0	0.79	0	0	0.79
Eif4e	Tsc2	5056576	5042855	10116.ENSRNOP00000063699	10116.ENSRNOP00000016221	0	0	0	0	0	0	0	0.79	0.79
Rpl24	Rpl19	5057430	5039407	10116.ENSRNOP00000064870	10116.ENSRNOP00000006359	0	0	0	0	0.459	0.515	0	0.261	0.789
Kcnd3	Ncs1	5044214	5041231	10116.ENSRNOP00000019997	10116.ENSRNOP00000011648	0	0	0	0	0.109	0.446	0	0.607	0.789
Gga1	Arf3	5055241	5052323	10116.ENSRNOP00000059486	10116.ENSRNOP00000047811	0	0	0	0	0	0.773	0	0.112	0.789
Cbx6	Pcgf1	5055822	5041059	10116.ENSRNOP00000061325	10116.ENSRNOP00000011173	0	0	0	0	0.045	0.421	0	0.648	0.788
Igf1r	Fgf22	5043960	5041331	10116.ENSRNOP00000019267	10116.ENSRNOP00000011936	0	0	0	0	0	0.055	0.6	0.485	0.788
Taf1a	Tbp	5056039	5037965	10116.ENSRNOP00000062006	10116.ENSRNOP00000002038	0	0	0	0	0	0.614	0	0.471	0.787
Ndst1	Extl3	5046430	5043726	10116.ENSRNOP00000025881	10116.ENSRNOP00000018583	0	0	0	0	0.087	0	0	0.776	0.787
Polr1c	Rps23	5046389	5045083	10116.ENSRNOP00000025787	10116.ENSRNOP00000022348	0.095	0	0	0	0.502	0.483	0	0.191	0.786
Gata3	Spi1	5046550	5042890	10116.ENSRNOP00000026187	10116.ENSRNOP00000016306	0	0	0	0	0	0.327	0	0.694	0.785
Polr1b	Nme3	5046051	5044815	10116.ENSRNOP00000024882	10116.ENSRNOP00000021650	0.085	0	0	0	0.064	0.216	0.65	0.226	0.784
Uba52	Nsa2	5046917	5045006	10116.ENSRNOP00000027073	10116.ENSRNOP00000022138	0	0.008	0	0	0.544	0.467	0	0.178	0.783
Etf1	Rps2	5046645	5044035	10116.ENSRNOP00000026398	10116.ENSRNOP00000019508	0	0	0	0	0.396	0.61	0	0.154	0.783
Sqle	Insig1	5041669	5040348	10116.ENSRNOP00000012883	10116.ENSRNOP00000009233	0	0	0	0	0.47	0	0	0.608	0.783
Rpl36a	RGD1566137	5052640	5050967	10116.ENSRNOP00000049014	10116.ENSRNOP00000042681	0	0	0	0	0.469	0.556	0	0.157	0.783
Timm8b	Timm17a	5041771	5040405	10116.ENSRNOP00000013188	10116.ENSRNOP00000009398	0	0	0	0	0.453	0.14	0	0.576	0.783
Grin1	Grm5	5047721	5044980	10116.ENSRNOP00000029227	10116.ENSRNOP00000022059	0	0	0	0	0.35	0.159	0	0.632	0.782
RGD1566137	Rps12	5050967	5045022	10116.ENSRNOP00000042681	10116.ENSRNOP00000022184	0.043	0	0	0	0.501	0.554	0	0.099	0.782
Cct2	Rps3	5047722	5045692	10116.ENSRNOP00000029234	10116.ENSRNOP00000023935	0	0	0	0	0.679	0.152	0	0.259	0.781
Syngap1	Grin1	5051341	5047721	10116.ENSRNOP00000044041	10116.ENSRNOP00000029227	0	0	0	0	0.214	0.513	0	0.471	0.78
Hibch	Uqcrh	5048379	5043060	10116.ENSRNOP00000032041	10116.ENSRNOP00000016751	0	0	0	0	0.779	0	0	0	0.779
Ndufs6	Cox7a2l2	5058869	5049574	10116.ENSRNOP00000066688	10116.ENSRNOP00000037372	0	0	0	0	0.571	0	0	0.507	0.779
Polr1b	Nme1	5046051	5038468	10116.ENSRNOP00000024882	10116.ENSRNOP00000003658	0.085	0	0	0	0.064	0.308	0.65	0.095	0.778
Klf2	Nos3	5043887	5041726	10116.ENSRNOP00000019052	10116.ENSRNOP00000013058	0	0	0	0	0.063	0.043	0	0.77	0.776
Pde1b	Adcy5	5053517	5051982	10116.ENSRNOP00000052147	10116.ENSRNOP00000046488	0	0	0	0	0.146	0	0.65	0.307	0.774
Cox4i1	Tfam	5045724	5037540	10116.ENSRNOP00000024033	10116.ENSRNOP00000000753	0	0	0	0	0.064	0	0	0.768	0.774
Rpl36	Rpl9	5055066	5048515	10116.ENSRNOP00000058934	10116.ENSRNOP00000032635	0	0	0	0	0.433	0.439	0	0.346	0.774
Decr2	Eci1	5047101	5041279	10116.ENSRNOP00000027518	10116.ENSRNOP00000011784	0.044	0	0	0	0.215	0.16	0	0.682	0.773
Dlg4	Shank3	5055096	5050529	10116.ENSRNOP00000059045	10116.ENSRNOP00000041083	0	0	0	0	0.066	0.147	0	0.737	0.773
Srm	Enoph1	5042376	5038298	10116.ENSRNOP00000014934	10116.ENSRNOP00000003083	0	0	0.291	0	0.063	0.463	0	0.441	0.773
Wdr12	Znrd1	5045528	5037588	10116.ENSRNOP00000023463	10116.ENSRNOP00000001012	0	0	0	0	0.773	0	0	0	0.773
Rasd2	Rasgrp1	5044221	5039858	10116.ENSRNOP00000020017	10116.ENSRNOP00000007687	0	0	0	0	0.08	0.3	0	0.674	0.772
Grin1	Shank1	5047721	5046515	10116.ENSRNOP00000029227	10116.ENSRNOP00000026100	0	0	0	0	0.225	0.228	0.36	0.476	0.772
Rps10	RGD1566137	5055923	5050967	10116.ENSRNOP00000061642	10116.ENSRNOP00000042681	0	0	0	0	0.459	0.538	0	0.16	0.771
Rplp2	Rpl19	5049776	5039407	10116.ENSRNOP00000038214	10116.ENSRNOP00000006359	0	0	0	0	0.419	0.452	0	0.338	0.771
Mvb12a	Wars	5045886	5039319	10116.ENSRNOP00000024413	10116.ENSRNOP00000006128	0	0	0	0	0	0.77	0	0	0.77
Kat8	Ing4	5046692	5045765	10116.ENSRNOP00000026527	10116.ENSRNOP00000024116	0	0	0	0	0.081	0.606	0	0.417	0.77
Ube2f	Cul5	5046905	5040982	10116.ENSRNOP00000027050	10116.ENSRNOP00000010956	0	0	0	0	0	0.451	0	0.598	0.77
mrpl11	Uba52	5046924	5046917	10116.ENSRNOP00000027091	10116.ENSRNOP00000027073	0	0	0	0	0.527	0.496	0	0.114	0.77
Rplp2	Rpl9	5049776	5048515	10116.ENSRNOP00000038214	10116.ENSRNOP00000032635	0	0	0	0	0.388	0.452	0	0.369	0.769
Gstm3	Gsta1	5046396	5043621	10116.ENSRNOP00000025800	10116.ENSRNOP00000018325	0	0	0	0.622	0.063	0	0.65	0.863	0.768
Rps19	RGD1566137	5058962	5050967	10116.ENSRNOP00000066808	10116.ENSRNOP00000042681	0.07	0	0	0	0.47	0.499	0	0.172	0.768
Xrcc1	Brca2	5046909	5037752	10116.ENSRNOP00000027057	10116.ENSRNOP00000001475	0	0	0	0	0.063	0	0	0.762	0.768
Etf1	Polr1b	5046645	5046051	10116.ENSRNOP00000026398	10116.ENSRNOP00000024882	0	0	0	0	0.676	0.31	0	0.044	0.767
Nos3	Ddah2	5041726	5037626	10116.ENSRNOP00000013058	10116.ENSRNOP00000001118	0	0	0	0	0.063	0	0	0.761	0.766
Eci2	Hadhb	5044967	5042278	10116.ENSRNOP00000022022	10116.ENSRNOP00000014637	0.125	0	0	0	0.207	0.306	0	0.572	0.766
Mrpl2	Rps3	5045874	5045692	10116.ENSRNOP00000024380	10116.ENSRNOP00000023935	0.085	0	0	0	0.455	0.421	0	0.286	0.766
Slc12a5	Ntrk2	5056075	5051759	10116.ENSRNOP00000062103	10116.ENSRNOP00000045635	0	0	0	0	0.198	0.069	0	0.712	0.766
Ube4a	Atxn3	5044694	5039788	10116.ENSRNOP00000021321	10116.ENSRNOP00000007505	0	0	0	0	0.063	0.608	0	0.416	0.766
Nqo1	Nme1	5043219	5038468	10116.ENSRNOP00000017175	10116.ENSRNOP00000003658	0	0	0	0	0.063	0.759	0	0.044	0.765
Rpl24	Rps2	5057430	5044035	10116.ENSRNOP00000064870	10116.ENSRNOP00000019508	0	0	0	0	0.471	0.529	0	0.129	0.764
Cdk4	Ccnl2	5048988	5046296	10116.ENSRNOP00000034754	10116.ENSRNOP00000025531	0	0	0	0	0.05	0.422	0.54	0.173	0.763
Gpx6	Gsta1	5054196	5043621	10116.ENSRNOP00000055070	10116.ENSRNOP00000018325	0	0	0	0	0.063	0	0.65	0.335	0.762
Rps19	Rpl36	5058962	5055066	10116.ENSRNOP00000066808	10116.ENSRNOP00000058934	0	0	0	0	0.43	0.46	0	0.287	0.761
Rps4x	Eprs	5059880	5048672	10116.ENSRNOP00000067969	10116.ENSRNOP00000033323	0	0	0	0	0.543	0.379	0	0.226	0.761
Prim1	Dctpp1	5056301	5045743	10116.ENSRNOP00000062827	10116.ENSRNOP00000024074	0	0	0	0	0.345	0	0.65	0	0.76
Pip5k1c	Plcg2	5054820	5043756	10116.ENSRNOP00000057873	10116.ENSRNOP00000018678	0	0	0	0	0.061	0.139	0.65	0.252	0.76
Rps19	Txn1	5058962	5042945	10116.ENSRNOP00000066808	10116.ENSRNOP00000016447	0	0	0	0	0.747	0	0	0.092	0.76
Homer1	Dlg4	5058316	5055096	10116.ENSRNOP00000065989	10116.ENSRNOP00000059045	0	0	0	0	0.045	0.215	0	0.703	0.758
Arrdc3	Lysmd3	5059659	5044885	10116.ENSRNOP00000067658	10116.ENSRNOP00000021818	0	0	0	0	0	0	0	0.758	0.758
Tcea1	Tbp	5040961	5037965	10116.ENSRNOP00000010893	10116.ENSRNOP00000002038	0	0	0	0	0.063	0.652	0	0.318	0.758
Slc36a1	Slc1a4	5043063	5039638	10116.ENSRNOP00000016755	10116.ENSRNOP00000007002	0.043	0	0	0	0.064	0.131	0	0.725	0.757
Wdr12	Utp3	5045528	5038847	10116.ENSRNOP00000023463	10116.ENSRNOP00000004787	0	0	0	0	0.744	0	0	0.09	0.757
Rps13	Polr1c	5049430	5046389	10116.ENSRNOP00000036690	10116.ENSRNOP00000025787	0.044	0	0	0	0.507	0.448	0	0.174	0.756
Slc12a5	Nlgn2	5056075	5053871	10116.ENSRNOP00000062103	10116.ENSRNOP00000053713	0	0	0	0	0.162	0	0	0.721	0.756
LOC684988	Polr1c	5047210	5046389	10116.ENSRNOP00000027803	10116.ENSRNOP00000025787	0.044	0	0	0	0.507	0.448	0	0.174	0.756
Rpl3	Polr1c	5055630	5046389	10116.ENSRNOP00000060662	10116.ENSRNOP00000025787	0.095	0	0	0	0.541	0	0	0.46	0.756
Ank3	Cntnap1	5051233	5047096	10116.ENSRNOP00000043687	10116.ENSRNOP00000027505	0	0	0	0	0.064	0.055	0	0.746	0.755
Rps29	Polr1c	5050429	5046389	10116.ENSRNOP00000040703	10116.ENSRNOP00000025787	0.092	0	0	0	0.476	0.447	0	0.174	0.753
Trpv1	Trpc6	5046679	5040224	10116.ENSRNOP00000026493	10116.ENSRNOP00000008905	0	0	0	0	0.063	0	0	0.747	0.753
Rps19	Rpl23	5058962	5039094	10116.ENSRNOP00000066808	10116.ENSRNOP00000005471	0	0	0	0	0.47	0.501	0	0.138	0.752
Rpl35a	RGD1566137	5054353	5050967	10116.ENSRNOP00000055825	10116.ENSRNOP00000042681	0	0	0	0	0.471	0.536	0	0.068	0.751
Abi2	Caskin1	5052898	5050236	10116.ENSRNOP00000050008	10116.ENSRNOP00000039956	0	0	0	0	0.096	0.555	0	0.43	0.75
Slc1a4	Slc7a1	5039638	5037667	10116.ENSRNOP00000007002	10116.ENSRNOP00000001234	0.042	0	0	0	0.064	0.08	0	0.732	0.749
Plcg2	Ipmk	5043756	5037537	10116.ENSRNOP00000018678	10116.ENSRNOP00000000748	0	0	0	0	0.12	0.114	0.65	0.191	0.749
Rps23	Txn1	5045083	5042945	10116.ENSRNOP00000022348	10116.ENSRNOP00000016447	0	0	0	0	0.747	0	0	0.048	0.749
Thra	Ncoa2	5041474	5041011	10116.ENSRNOP00000012340	10116.ENSRNOP00000011026	0	0	0	0	0	0.298	0.6	0.179	0.749
Timm17al1	Grpel1	5057609	5040233	10116.ENSRNOP00000065084	10116.ENSRNOP00000008930	0	0	0	0	0.478	0.07	0	0.526	0.749
Ndufs5	Cox4i1	5049650	5045724	10116.ENSRNOP00000037699	10116.ENSRNOP00000024033	0	0	0	0	0.546	0	0	0.469	0.748
Gstm3	Nfe2l2	5046396	5037989	10116.ENSRNOP00000025800	10116.ENSRNOP00000002114	0	0	0	0	0.049	0	0	0.746	0.748
Nme4	Polr1b	5047124	5046051	10116.ENSRNOP00000027593	10116.ENSRNOP00000024882	0.085	0	0	0	0.064	0.216	0.65	0.095	0.748
Ece1	Ednra	5056328	5054170	10116.ENSRNOP00000062928	10116.ENSRNOP00000054967	0	0	0	0	0	0	0	0.747	0.747
Nlgn2	Shank3	5053871	5050529	10116.ENSRNOP00000053713	10116.ENSRNOP00000041083	0	0	0	0	0.064	0.318	0	0.635	0.746
Rnf113a1	Sf3a2	5052328	5046556	10116.ENSRNOP00000047839	10116.ENSRNOP00000026202	0	0	0	0	0	0.58	0	0.418	0.745
Spi1	Tbp	5042890	5037965	10116.ENSRNOP00000016306	10116.ENSRNOP00000002038	0	0	0	0	0	0.181	0.6	0.285	0.745
Gna13	Amz2	5053469	5037376	10116.ENSRNOP00000051938	10116.ENSRNOP00000000263	0	0	0	0	0	0	0	0.745	0.745
Rpl3	Ncl	5055630	5045990	10116.ENSRNOP00000060662	10116.ENSRNOP00000024712	0	0	0	0	0.247	0.599	0	0.224	0.745
Eprs	Rps3	5048672	5045692	10116.ENSRNOP00000033323	10116.ENSRNOP00000023935	0	0	0	0	0.466	0.377	0	0.294	0.744
Rps14	AK6	5054455	5048759	10116.ENSRNOP00000056260	10116.ENSRNOP00000033728	0	0	0	0	0.123	0.591	0	0.346	0.744
LOC679683	AK6	5053664	5048759	10116.ENSRNOP00000052873	10116.ENSRNOP00000033728	0	0	0	0	0.123	0.591	0	0.346	0.744
Rps15	Eprs	5049079	5048672	10116.ENSRNOP00000035156	10116.ENSRNOP00000033323	0	0	0	0	0.447	0.377	0	0.315	0.743
Cct2	Eif2s2	5047722	5045638	10116.ENSRNOP00000029234	10116.ENSRNOP00000023786	0	0	0	0	0.737	0	0	0.065	0.743
Nsa2	Utp3	5045006	5038847	10116.ENSRNOP00000022138	10116.ENSRNOP00000004787	0	0	0	0	0.574	0.422	0	0	0.743
Polr1c	Nme1	5046389	5038468	10116.ENSRNOP00000025787	10116.ENSRNOP00000003658	0.052	0	0	0	0.172	0.072	0.65	0.144	0.742
Polr1b	Rps3	5046051	5045692	10116.ENSRNOP00000024882	10116.ENSRNOP00000023935	0.092	0	0	0	0.474	0.422	0	0.174	0.741
Kat8	Max	5046692	5040980	10116.ENSRNOP00000026527	10116.ENSRNOP00000010954	0	0	0	0	0	0.084	0.72	0.073	0.741
Polr1c	Mrpl2	5046389	5045874	10116.ENSRNOP00000025787	10116.ENSRNOP00000024380	0.092	0	0	0	0.528	0.355	0	0.174	0.741
Kif1b	Ublcp1	5052694	5039294	10116.ENSRNOP00000049243	10116.ENSRNOP00000006063	0	0	0	0	0	0.049	0	0.737	0.739
Ntrk2	Fgf22	5051759	5041331	10116.ENSRNOP00000045635	10116.ENSRNOP00000011936	0	0	0	0	0	0.055	0.6	0.365	0.739
Rps15	Polr1b	5049079	5046051	10116.ENSRNOP00000035156	10116.ENSRNOP00000024882	0.092	0	0	0	0.468	0.422	0	0.174	0.738
Ndufs5	Timm8b	5049650	5041771	10116.ENSRNOP00000037699	10116.ENSRNOP00000013188	0	0	0	0	0.686	0	0	0.201	0.738
Syngap1	Shank3	5051341	5050529	10116.ENSRNOP00000044041	10116.ENSRNOP00000041083	0	0	0	0	0.064	0.204	0	0.676	0.737
Utp3	Rrp15	5038847	5038376	10116.ENSRNOP00000004787	10116.ENSRNOP00000003359	0	0	0	0	0.737	0	0	0	0.737
Chchd2	Ghitm	5057786	5043772	10116.ENSRNOP00000065307	10116.ENSRNOP00000018723	0	0	0	0	0.398	0.073	0	0.567	0.737
Rpl36	Rps2	5055066	5044035	10116.ENSRNOP00000058934	10116.ENSRNOP00000019508	0	0	0	0	0.382	0.437	0	0.306	0.737
Ncoa2	Thrb	5041011	5040175	10116.ENSRNOP00000011026	10116.ENSRNOP00000008752	0	0	0	0	0	0.298	0.6	0.135	0.736
Nrxn2	Dlg4	5056551	5055096	10116.ENSRNOP00000063600	10116.ENSRNOP00000059045	0	0	0	0	0.179	0.416	0	0.495	0.736
Nsa2	Fcf1	5045006	5039380	10116.ENSRNOP00000022138	10116.ENSRNOP00000006297	0	0	0	0	0.579	0.397	0	0	0.735
mrpl11	Aurkaip1	5046924	5046457	10116.ENSRNOP00000027091	10116.ENSRNOP00000025952	0	0	0	0	0.271	0.652	0	0	0.735
Pak1ip1	Utp3	5048726	5038847	10116.ENSRNOP00000033583	10116.ENSRNOP00000004787	0	0	0	0	0.693	0	0	0.175	0.735
Eprs	Rpl23	5048672	5039094	10116.ENSRNOP00000033323	10116.ENSRNOP00000005471	0.042	0	0	0	0.499	0.317	0	0.287	0.734
Kat8	Ino80c	5046692	5045016	10116.ENSRNOP00000026527	10116.ENSRNOP00000022169	0	0	0	0	0	0	0.72	0.089	0.734
Ap2b1	Epn1	5060044	5044680	10116.ENSRNOP00000068516	10116.ENSRNOP00000021286	0	0	0	0	0.075	0.518	0	0.451	0.734
Rpl9	Etf1	5048515	5046645	10116.ENSRNOP00000032635	10116.ENSRNOP00000026398	0	0	0.229	0	0.358	0.499	0	0.048	0.732
Eif4e	Eif5	5056576	5041947	10116.ENSRNOP00000063699	10116.ENSRNOP00000013695	0	0	0	0	0.091	0	0	0.716	0.731
LOC499136	Rps29	5053259	5050429	10116.ENSRNOP00000051281	10116.ENSRNOP00000040703	0	0	0	0	0.473	0.511	0	0	0.731
Insr	Crk	5055460	5039427	10116.ENSRNOP00000060141	10116.ENSRNOP00000006407	0	0	0	0	0.063	0.23	0.6	0.173	0.729
Gata3	Il33	5046550	5044979	10116.ENSRNOP00000026187	10116.ENSRNOP00000022056	0	0	0	0	0	0	0	0.729	0.729
Syngap1	Shank1	5051341	5046515	10116.ENSRNOP00000044041	10116.ENSRNOP00000026100	0	0	0	0	0.225	0.283	0	0.55	0.728
P4hb	Uggt1	5053439	5044399	10116.ENSRNOP00000051841	10116.ENSRNOP00000020558	0	0	0	0	0.176	0.16	0	0.639	0.728
Scamp5	Cntnap1	5048693	5047096	10116.ENSRNOP00000033401	10116.ENSRNOP00000027505	0	0	0	0	0.063	0	0	0.721	0.727
Ptges3l1	Ppig	5054254	5040708	10116.ENSRNOP00000055283	10116.ENSRNOP00000010216	0	0	0	0	0.518	0.297	0	0.261	0.727
Eprs	Wars	5048672	5039319	10116.ENSRNOP00000033323	10116.ENSRNOP00000006128	0.098	0	0	0.563	0.541	0	0	0.845	0.726
Tceb1	Cbfb	5059457	5044096	10116.ENSRNOP00000067410	10116.ENSRNOP00000019656	0	0	0	0	0.063	0.653	0	0.225	0.726
Ino80c	Max	5045016	5040980	10116.ENSRNOP00000022169	10116.ENSRNOP00000010954	0	0	0	0	0.063	0	0.72	0	0.726
Rpl35a	Rps2	5054353	5044035	10116.ENSRNOP00000055825	10116.ENSRNOP00000019508	0	0	0	0	0.35	0.42	0	0.333	0.726
Eprs	Cct6a	5048672	5037664	10116.ENSRNOP00000033323	10116.ENSRNOP00000001227	0.085	0	0	0	0.6	0.169	0	0.208	0.726
Selt	Mtpn	5043606	5042694	10116.ENSRNOP00000018248	10116.ENSRNOP00000015808	0	0	0	0	0.724	0	0	0	0.724
Tceb1	Sel1l	5059457	5051121	10116.ENSRNOP00000067410	10116.ENSRNOP00000043232	0	0	0	0	0	0	0.72	0.057	0.724
LOC499136	Rps23	5053259	5045083	10116.ENSRNOP00000051281	10116.ENSRNOP00000022348	0	0	0	0	0.4	0.556	0	0	0.722
Eprs	Uba52	5048672	5046917	10116.ENSRNOP00000033323	10116.ENSRNOP00000027073	0	0	0	0	0.486	0.451	0	0.094	0.722
Jmjd6	Crk	5056291	5039427	10116.ENSRNOP00000062806	10116.ENSRNOP00000006407	0	0	0	0	0.064	0.558	0	0.381	0.721
Rps15	Mrpl2	5049079	5045874	10116.ENSRNOP00000035156	10116.ENSRNOP00000024380	0.085	0	0	0	0.455	0.421	0	0.149	0.721
Rpl3	Pes1	5055630	5039275	10116.ENSRNOP00000060662	10116.ENSRNOP00000005996	0	0	0	0	0.296	0.536	0	0.217	0.721
Kat8	Pelp1	5046692	5046516	10116.ENSRNOP00000026527	10116.ENSRNOP00000026102	0	0	0	0	0	0	0.72	0	0.72
Dagla	Abhd12	5048695	5040874	10116.ENSRNOP00000033416	10116.ENSRNOP00000010640	0	0	0	0	0.064	0	0	0.713	0.72
Sel1l	Vhl	5051121	5041958	10116.ENSRNOP00000043232	10116.ENSRNOP00000013727	0	0	0	0	0	0	0.72	0	0.72
Pelp1	Ino80c	5046516	5045016	10116.ENSRNOP00000026102	10116.ENSRNOP00000022169	0	0	0	0	0	0	0.72	0	0.72
Sel1l	Tceb2	5051121	5039605	10116.ENSRNOP00000043232	10116.ENSRNOP00000006892	0	0	0	0	0	0	0.72	0	0.72
Pelp1	Max	5046516	5040980	10116.ENSRNOP00000026102	10116.ENSRNOP00000010954	0	0	0	0	0	0	0.72	0	0.72
Ndufs6	Cox4i1	5058869	5045724	10116.ENSRNOP00000066688	10116.ENSRNOP00000024033	0	0	0	0	0.466	0.157	0	0.427	0.72
Nme3	Ak2	5044815	5037333	10116.ENSRNOP00000021650	10116.ENSRNOP00000000134	0.044	0	0	0	0.065	0.075	0.65	0.184	0.72
Decr2	Eci2	5047101	5044967	10116.ENSRNOP00000027518	10116.ENSRNOP00000022022	0.044	0	0	0	0.21	0.151	0	0.614	0.719
Uqcrh	Timm8b	5043060	5041771	10116.ENSRNOP00000016751	10116.ENSRNOP00000013188	0	0	0	0	0.697	0	0	0.11	0.719
Nqo1	Txn1	5043219	5042945	10116.ENSRNOP00000017175	10116.ENSRNOP00000016447	0	0	0	0	0.063	0	0	0.712	0.718
Fst	Acvr1b	5042643	5040393	10116.ENSRNOP00000015680	10116.ENSRNOP00000009345	0	0	0	0	0	0.114	0	0.695	0.718
Dlg4	Aif1	5055096	5037635	10116.ENSRNOP00000059045	10116.ENSRNOP00000001135	0	0	0	0	0	0.305	0	0.61	0.717
Mrps22	Pus1	5059274	5053852	10116.ENSRNOP00000067192	10116.ENSRNOP00000053623	0	0	0	0	0.084	0	0	0.704	0.717
Pde1b	Adcy6	5053517	5043011	10116.ENSRNOP00000052147	10116.ENSRNOP00000016624	0	0	0	0	0.086	0	0.65	0.184	0.716
Rps27	Txn1	5045301	5042945	10116.ENSRNOP00000022897	10116.ENSRNOP00000016447	0	0	0	0	0.716	0	0	0.042	0.716
Rpl9	Rpl23	5048515	5039094	10116.ENSRNOP00000032635	10116.ENSRNOP00000005471	0.07	0	0	0	0.446	0.457	0	0.105	0.716
Cs	Cox4i1	5049027	5045724	10116.ENSRNOP00000034921	10116.ENSRNOP00000024033	0	0	0	0	0.134	0	0	0.685	0.715
Eci3	Hadhb	5052953	5042278	10116.ENSRNOP00000050206	10116.ENSRNOP00000014637	0.068	0	0	0	0.171	0.306	0	0.529	0.714
Pak1ip1	Pes1	5048726	5039275	10116.ENSRNOP00000033583	10116.ENSRNOP00000005996	0	0	0	0	0.668	0.152	0	0.067	0.714
Rps14	Polr1b	5054455	5046051	10116.ENSRNOP00000056260	10116.ENSRNOP00000024882	0.089	0	0	0	0.424	0.421	0	0.169	0.713
Paqr8	Olr149	5049899	5045348	10116.ENSRNOP00000038736	10116.ENSRNOP00000023002	0	0	0	0	0	0	0	0.713	0.713
LOC679683	Polr1b	5053664	5046051	10116.ENSRNOP00000052873	10116.ENSRNOP00000024882	0.089	0	0	0	0.424	0.421	0	0.169	0.713
Gstm3	Txn1	5046396	5042945	10116.ENSRNOP00000025800	10116.ENSRNOP00000016447	0	0	0	0	0	0	0	0.712	0.712
Dlat	Pdp2	5048573	5042953	10116.ENSRNOP00000032890	10116.ENSRNOP00000016462	0	0	0	0	0.063	0.147	0	0.668	0.712
Hmbs	Coq3	5042106	5041849	10116.ENSRNOP00000014128	10116.ENSRNOP00000013384	0	0	0	0	0.196	0	0	0.657	0.712
RGD1305807	Polr2g	5056319	5046605	10116.ENSRNOP00000062894	10116.ENSRNOP00000026313	0	0	0	0	0.075	0.612	0	0.261	0.711
Trpv1	Rnpep	5046679	5040335	10116.ENSRNOP00000026493	10116.ENSRNOP00000009198	0	0	0	0	0	0	0	0.711	0.711
Bace1	Creb1	5045259	5043622	10116.ENSRNOP00000022796	10116.ENSRNOP00000018326	0	0	0	0	0	0	0	0.711	0.711
P4hb	Sel1l	5053439	5051121	10116.ENSRNOP00000051841	10116.ENSRNOP00000043232	0	0	0	0	0.102	0	0	0.692	0.711
Dlg4	Creb1	5055096	5043622	10116.ENSRNOP00000059045	10116.ENSRNOP00000018326	0	0	0	0	0	0	0	0.71	0.71
RGD1566137	Rpl9	5050967	5048515	10116.ENSRNOP00000042681	10116.ENSRNOP00000032635	0.065	0	0	0	0.415	0.457	0	0.139	0.71
Creb1	Syn1	5043622	5042145	10116.ENSRNOP00000018326	10116.ENSRNOP00000014250	0	0	0	0	0	0	0	0.71	0.71
Igf1r	Pdgfa	5043960	5037868	10116.ENSRNOP00000019267	10116.ENSRNOP00000001775	0	0	0	0	0	0	0.6	0.305	0.71
Ntrk2	Syn1	5051759	5042145	10116.ENSRNOP00000045635	10116.ENSRNOP00000014250	0	0	0	0	0.227	0	0	0.64	0.71
Aldoart2	Hk2	5050613	5040192	10116.ENSRNOP00000041393	10116.ENSRNOP00000008813	0	0	0	0	0.064	0	0.6	0.288	0.71
Stub1	Atxn3	5046852	5039788	10116.ENSRNOP00000026921	10116.ENSRNOP00000007505	0	0	0	0	0.064	0.418	0	0.511	0.71
Paics	Pigy	5055878	5040253	10116.ENSRNOP00000061495	10116.ENSRNOP00000008973	0	0	0	0	0	0	0	0.71	0.71
Csf1	Spi1	5046180	5042890	10116.ENSRNOP00000025221	10116.ENSRNOP00000016306	0	0	0	0	0.073	0	0	0.699	0.709
Dlg4	Grm5	5055096	5044980	10116.ENSRNOP00000059045	10116.ENSRNOP00000022059	0	0	0	0	0.213	0.079	0	0.63	0.709
Rps4x	Mrpl2	5059880	5045874	10116.ENSRNOP00000067969	10116.ENSRNOP00000024380	0.085	0	0	0	0.455	0.421	0	0.11	0.708
Etf1	Eif4a2	5046645	5038104	10116.ENSRNOP00000026398	10116.ENSRNOP00000002484	0	0	0	0	0.554	0	0	0.368	0.707
Polr1c	Nme3	5046389	5044815	10116.ENSRNOP00000025787	10116.ENSRNOP00000021650	0.052	0	0	0	0.082	0.05	0.65	0.144	0.707
Nme4	Polr1c	5047124	5046389	10116.ENSRNOP00000027593	10116.ENSRNOP00000025787	0.052	0	0	0	0.082	0.05	0.65	0.144	0.707
Plcg2	Pip4k2b	5043756	5043519	10116.ENSRNOP00000018678	10116.ENSRNOP00000017989	0	0	0	0	0.049	0.139	0.65	0.094	0.705
Zfp36l1	Hnrpd	5053349	5051983	10116.ENSRNOP00000051546	10116.ENSRNOP00000046491	0	0	0	0	0.05	0.155	0	0.662	0.705
Notch3	Dvl1	5049620	5046659	10116.ENSRNOP00000037570	10116.ENSRNOP00000026439	0	0	0	0	0.064	0.165	0.6	0.168	0.705
Nos3	Ncf1	5041726	5037960	10116.ENSRNOP00000013058	10116.ENSRNOP00000002028	0	0	0	0	0.077	0	0	0.693	0.704
LOC499136	Rps15	5053259	5049079	10116.ENSRNOP00000051281	10116.ENSRNOP00000035156	0	0	0	0	0.359	0.556	0	0	0.703
Pak1ip1	Polr1b	5048726	5046051	10116.ENSRNOP00000033583	10116.ENSRNOP00000024882	0	0	0	0	0.702	0	0	0	0.702
Aldoart2	Pgam2	5050613	5043598	10116.ENSRNOP00000041393	10116.ENSRNOP00000018227	0.074	0	0	0	0.14	0.066	0.6	0.151	0.701
Cox7a2	Cox6b2	5055543	5049174	10116.ENSRNOP00000060398	10116.ENSRNOP00000035591	0	0	0	0	0.154	0.422	0	0.436	0.7
Mfsd8	Sv2c	5052264	5045908	10116.ENSRNOP00000047609	10116.ENSRNOP00000024459	0	0	0	0	0.062	0	0	0.693	0.7
Cox7a2l2	Cox6b2	5049574	5049174	10116.ENSRNOP00000037372	10116.ENSRNOP00000035591	0	0	0	0	0.154	0.422	0	0.436	0.7
Cct2	Nudc	5047722	5040598	10116.ENSRNOP00000029234	10116.ENSRNOP00000009933	0	0	0	0	0.696	0	0	0.049	0.699
Sepw1	Txn1	5043718	5042945	10116.ENSRNOP00000018559	10116.ENSRNOP00000016447	0	0	0	0	0	0	0	0.699	0.699
Ets1	Tbp	5041328	5037965	10116.ENSRNOP00000011925	10116.ENSRNOP00000002038	0	0	0	0	0.05	0.155	0.6	0.175	0.699
Eif4e	Tsc1	5056576	5043113	10116.ENSRNOP00000063699	10116.ENSRNOP00000016904	0	0	0	0	0	0	0	0.698	0.698
Eprs	LOC684988	5048672	5047210	10116.ENSRNOP00000033323	10116.ENSRNOP00000027803	0.143	0	0	0	0.392	0.311	0	0.259	0.698
P4hb	Got2	5053439	5042751	10116.ENSRNOP00000051841	10116.ENSRNOP00000015956	0	0	0	0	0.619	0.043	0	0.237	0.698
Rps13	Eprs	5049430	5048672	10116.ENSRNOP00000036690	10116.ENSRNOP00000033323	0.143	0	0	0	0.392	0.311	0	0.259	0.698
Hap1	Gabra1	5044415	5038829	10116.ENSRNOP00000020603	10116.ENSRNOP00000004725	0	0	0	0	0.128	0	0.6	0.205	0.698
Sqle	Aacs	5041669	5037686	10116.ENSRNOP00000012883	10116.ENSRNOP00000001292	0.072	0	0	0	0.565	0	0	0.308	0.697
Tef	Cry2	5046579	5040680	10116.ENSRNOP00000026258	10116.ENSRNOP00000010142	0	0	0	0	0.146	0	0	0.659	0.697
Utp14a	Nsa2	5053352	5045006	10116.ENSRNOP00000051553	10116.ENSRNOP00000022138	0	0	0	0	0.515	0.402	0	0	0.697
Ftsj3	LOC498154	5041818	5037856	10116.ENSRNOP00000013295	10116.ENSRNOP00000001734	0	0	0	0	0.695	0.048	0	0	0.697
Tspan31	Cct2	5049487	5047722	10116.ENSRNOP00000036976	10116.ENSRNOP00000029234	0	0	0	0	0.16	0	0	0.653	0.696
Drg1	Wdr12	5046189	5045528	10116.ENSRNOP00000025241	10116.ENSRNOP00000023463	0	0	0	0	0.696	0	0	0	0.696
RGD1566137	Rpl19	5050967	5039407	10116.ENSRNOP00000042681	10116.ENSRNOP00000006359	0	0	0	0	0.429	0.452	0	0.105	0.695
Tyrobp	Alox5ap	5047405	5037657	10116.ENSRNOP00000028284	10116.ENSRNOP00000001207	0	0	0	0	0.688	0	0	0.063	0.695
Srsf11	Thrap3	5051112	5041914	10116.ENSRNOP00000043202	10116.ENSRNOP00000013570	0	0	0	0	0.069	0.611	0	0.227	0.695
Gsta1	Nqo1	5043621	5043219	10116.ENSRNOP00000018325	10116.ENSRNOP00000017175	0	0	0	0	0.08	0	0	0.682	0.695
Erbb4	Crk	5043965	5039427	10116.ENSRNOP00000019283	10116.ENSRNOP00000006407	0	0	0	0	0	0.61	0	0.25	0.695
Actn4	Myoz3	5047195	5046473	10116.ENSRNOP00000027773	10116.ENSRNOP00000025989	0	0	0	0	0.077	0.056	0	0.677	0.694
Tmem180	Mfsd8	5052711	5052264	10116.ENSRNOP00000049314	10116.ENSRNOP00000047609	0	0	0	0	0	0	0	0.694	0.694
Polr1b	Pes1	5046051	5039275	10116.ENSRNOP00000024882	10116.ENSRNOP00000005996	0	0	0	0	0.684	0.045	0	0.065	0.693
Nox1	Nos3	5058322	5041726	10116.ENSRNOP00000065995	10116.ENSRNOP00000013058	0	0	0	0	0.063	0	0	0.685	0.692
Cx3cl1	Aif1	5045002	5037635	10116.ENSRNOP00000022128	10116.ENSRNOP00000001135	0	0	0	0	0	0	0	0.691	0.691
Polr1b	Rps23	5046051	5045083	10116.ENSRNOP00000024882	10116.ENSRNOP00000022348	0.089	0	0	0	0.38	0.421	0	0.169	0.691
Sel1l	Uggt1	5051121	5044399	10116.ENSRNOP00000043232	10116.ENSRNOP00000020558	0	0	0	0	0.137	0	0	0.656	0.691
Erbb4	Fgf22	5043965	5041331	10116.ENSRNOP00000019283	10116.ENSRNOP00000011936	0	0	0	0	0	0	0.6	0.26	0.691
Rnpep	Trpc6	5040335	5040224	10116.ENSRNOP00000009198	10116.ENSRNOP00000008905	0	0	0	0	0	0	0	0.69	0.69
Rpl3	Mrpl2	5055630	5045874	10116.ENSRNOP00000060662	10116.ENSRNOP00000024380	0.084	0	0	0	0.408	0.417	0	0.136	0.69
Hmbs	Tbp	5042106	5037965	10116.ENSRNOP00000014128	10116.ENSRNOP00000002038	0	0	0	0	0	0	0	0.69	0.69
Rps14	Mrpl2	5054455	5045874	10116.ENSRNOP00000056260	10116.ENSRNOP00000024380	0.084	0	0	0	0.408	0.416	0	0.136	0.689
Tceb1	Timm8b	5059457	5041771	10116.ENSRNOP00000067410	10116.ENSRNOP00000013188	0	0	0	0	0.687	0	0	0.049	0.689
LOC679683	Mrpl2	5053664	5045874	10116.ENSRNOP00000052873	10116.ENSRNOP00000024380	0.084	0	0	0	0.408	0.416	0	0.136	0.689
Bbs7	Rab8a	5044736	5044477	10116.ENSRNOP00000021453	10116.ENSRNOP00000020748	0	0	0	0	0.048	0	0	0.686	0.689
mrpl11	Rps3	5046924	5045692	10116.ENSRNOP00000027091	10116.ENSRNOP00000023935	0.083	0	0	0	0.419	0.408	0	0.13	0.689
Mrpl2	Rps23	5045874	5045083	10116.ENSRNOP00000024380	10116.ENSRNOP00000022348	0.084	0	0	0	0.408	0.416	0	0.136	0.689
Gcnt1	Galnt10	5058336	5038402	10116.ENSRNOP00000066013	10116.ENSRNOP00000003447	0	0	0	0	0	0	0.65	0.15	0.689
Ica1	Rab2a	5041233	5040110	10116.ENSRNOP00000011651	10116.ENSRNOP00000008522	0	0	0	0	0	0.069	0	0.679	0.689
Ap2b1	Arf3	5060044	5052323	10116.ENSRNOP00000068516	10116.ENSRNOP00000047811	0	0	0	0	0.124	0.647	0	0.077	0.689
Rpl24	Pak1ip1	5057430	5048726	10116.ENSRNOP00000064870	10116.ENSRNOP00000033583	0	0	0	0	0.467	0.211	0	0.319	0.688
LOC499136	Rpl36a	5053259	5052640	10116.ENSRNOP00000051281	10116.ENSRNOP00000049014	0	0	0	0	0.457	0.45	0	0	0.688
Cdkn1b	Jag1	5052947	5040872	10116.ENSRNOP00000050173	10116.ENSRNOP00000010638	0	0	0	0	0	0	0	0.687	0.687
Arf3	Cyth1	5052323	5038651	10116.ENSRNOP00000047811	10116.ENSRNOP00000004196	0	0	0	0	0	0.613	0	0.225	0.687
Paics	Cct2	5055878	5047722	10116.ENSRNOP00000061495	10116.ENSRNOP00000029234	0	0	0	0	0.677	0	0	0.072	0.687
Dlg2	Syngap1	5053544	5051341	10116.ENSRNOP00000052268	10116.ENSRNOP00000044041	0	0	0	0	0.119	0.283	0	0.542	0.686
Pus1	Dars2	5053852	5038528	10116.ENSRNOP00000053623	10116.ENSRNOP00000003828	0	0	0	0	0.064	0.048	0	0.676	0.686
Rps15	Nsa2	5049079	5045006	10116.ENSRNOP00000035156	10116.ENSRNOP00000022138	0	0	0	0	0.416	0.397	0	0.181	0.686
Nsa2	Rpl10a	5045006	5037475	10116.ENSRNOP00000022138	10116.ENSRNOP00000000603	0	0	0	0	0.529	0.313	0	0.109	0.686
Cyb5r4	Tmed5	5042027	5037315	10116.ENSRNOP00000013909	10116.ENSRNOP00000000083	0	0	0	0	0.075	0.058	0	0.669	0.686
Mtpn	Enoph1	5042694	5038298	10116.ENSRNOP00000015808	10116.ENSRNOP00000003083	0	0	0	0	0.685	0	0	0	0.685
Cox7a2	Txn1	5055543	5042945	10116.ENSRNOP00000060398	10116.ENSRNOP00000016447	0	0	0	0	0.685	0	0	0	0.685
Eprs	Cct2	5048672	5047722	10116.ENSRNOP00000033323	10116.ENSRNOP00000029234	0.085	0	0	0	0.54	0.169	0	0.208	0.685
Cs	Aacs	5049027	5037686	10116.ENSRNOP00000034921	10116.ENSRNOP00000001292	0.096	0	0	0	0.469	0.133	0	0.331	0.684
Cox6b2	Uqcrh	5049174	5043060	10116.ENSRNOP00000035591	10116.ENSRNOP00000016751	0	0	0	0	0.483	0	0	0.414	0.684
Gpx6	Txn1	5054196	5042945	10116.ENSRNOP00000055070	10116.ENSRNOP00000016447	0	0	0	0	0.063	0.17	0	0.625	0.683
Rexo4	Snf8	5051170	5040248	10116.ENSRNOP00000043432	10116.ENSRNOP00000008964	0	0	0	0	0.063	0	0	0.676	0.683
Timm23	Timm8b	5046858	5041771	10116.ENSRNOP00000026932	10116.ENSRNOP00000013188	0	0	0	0	0.518	0.194	0	0.251	0.683
Polr2g	Nme1	5046605	5038468	10116.ENSRNOP00000026313	10116.ENSRNOP00000003658	0.044	0	0	0	0.127	0	0.65	0	0.682
Cox17	Cox4i1	5054464	5045724	10116.ENSRNOP00000056297	10116.ENSRNOP00000024033	0	0	0	0	0.346	0	0	0.534	0.682
Txn1	Nfe2l2	5042945	5037989	10116.ENSRNOP00000016447	10116.ENSRNOP00000002114	0	0	0	0	0	0.045	0	0.68	0.682
Zfp639	Hexim1	5056292	5038678	10116.ENSRNOP00000062807	10116.ENSRNOP00000004272	0	0	0	0	0	0.056	0	0.676	0.681
Aurkaip1	Mrpl44	5046457	5044353	10116.ENSRNOP00000025952	10116.ENSRNOP00000020420	0	0	0	0	0.123	0.652	0	0	0.681
Cand2	Cul5	5042132	5040982	10116.ENSRNOP00000014207	10116.ENSRNOP00000010956	0	0	0	0	0.086	0.451	0	0.416	0.681
Ccdc71	Ftsj3	5057962	5041818	10116.ENSRNOP00000065526	10116.ENSRNOP00000013295	0	0	0	0	0	0	0	0.681	0.681
Wars	Dars	5039319	5038974	10116.ENSRNOP00000006128	10116.ENSRNOP00000005127	0.098	0	0	0	0.174	0	0	0.607	0.681
Grin1	Syn1	5047721	5042145	10116.ENSRNOP00000029227	10116.ENSRNOP00000014250	0	0	0	0	0.272	0	0	0.58	0.681
Eif4h	Eif4a2	5051128	5038104	10116.ENSRNOP00000043254	10116.ENSRNOP00000002484	0	0	0	0	0.118	0.301	0	0.523	0.68
Hmgcs1	Dars	5045561	5038974	10116.ENSRNOP00000023554	10116.ENSRNOP00000005127	0	0	0	0	0.128	0.619	0	0.116	0.68
Rps3	Nsa2	5045692	5045006	10116.ENSRNOP00000023935	10116.ENSRNOP00000022138	0	0	0	0	0.44	0.397	0	0.125	0.679
Naglt1	Mfsd8	5053946	5052264	10116.ENSRNOP00000054044	10116.ENSRNOP00000047609	0	0	0	0	0	0	0	0.679	0.679
Rpl9	Rps2	5048515	5044035	10116.ENSRNOP00000032635	10116.ENSRNOP00000019508	0.044	0	0	0	0.267	0.4	0	0.327	0.679
Rpl14	Pes1	5055953	5039275	10116.ENSRNOP00000061747	10116.ENSRNOP00000005996	0	0	0	0	0.179	0.411	0	0.391	0.679
Os9	Mlec	5051576	5049154	10116.ENSRNOP00000044914	10116.ENSRNOP00000035497	0	0	0	0	0.063	0	0	0.671	0.678
Tspan31	Dcun1d3	5049487	5043926	10116.ENSRNOP00000036976	10116.ENSRNOP00000019167	0	0	0	0	0	0	0	0.678	0.678
Trnau1ap	Sepw1	5058099	5043718	10116.ENSRNOP00000065702	10116.ENSRNOP00000018559	0	0	0	0	0	0	0	0.677	0.677
Shc1	Crk	5047304	5039427	10116.ENSRNOP00000028038	10116.ENSRNOP00000006407	0	0	0	0.586	0	0.556	0	0.675	0.677
Rps29	Polr1b	5050429	5046051	10116.ENSRNOP00000040703	10116.ENSRNOP00000024882	0.087	0	0	0	0.364	0.42	0	0.156	0.677
F2r	Eprs	5058039	5048672	10116.ENSRNOP00000065624	10116.ENSRNOP00000033323	0	0	0	0	0	0	0	0.676	0.676
Cbx6	Cul5	5055822	5040982	10116.ENSRNOP00000061325	10116.ENSRNOP00000010956	0	0	0	0	0	0	0	0.676	0.676
RGD1566137	Rps2	5050967	5044035	10116.ENSRNOP00000042681	10116.ENSRNOP00000019508	0.06	0	0	0	0.386	0.454	0	0.094	0.676
Tor3a	Dars2	5039185	5038528	10116.ENSRNOP00000005726	10116.ENSRNOP00000003828	0	0	0	0	0	0	0	0.676	0.676
Prim1	Nme1	5056301	5038468	10116.ENSRNOP00000062827	10116.ENSRNOP00000003658	0	0	0	0	0.114	0	0.65	0	0.676
Rps15	mrpl11	5049079	5046924	10116.ENSRNOP00000035156	10116.ENSRNOP00000027091	0.083	0	0	0	0.395	0.408	0	0.13	0.676
Rps29	Mrpl2	5050429	5045874	10116.ENSRNOP00000040703	10116.ENSRNOP00000024380	0.083	0	0	0	0.395	0.407	0	0.13	0.675
Carm1	Ncl	5050984	5045990	10116.ENSRNOP00000042739	10116.ENSRNOP00000024712	0	0	0	0	0.063	0.607	0	0.188	0.675
Rab11a	Trappc3	5042618	5042188	10116.ENSRNOP00000015598	10116.ENSRNOP00000014383	0	0	0	0	0.064	0.197	0	0.603	0.675
Srek1	rCG_37337	5052648	5046870	10116.ENSRNOP00000049050	10116.ENSRNOP00000026964	0	0	0	0.567	0.29	0.502	0	0.307	0.675
Cox17	Coq7	5054464	5045342	10116.ENSRNOP00000056297	10116.ENSRNOP00000022988	0	0	0	0	0.086	0	0	0.658	0.674
Shank3	Sharpin	5050529	5043540	10116.ENSRNOP00000041083	10116.ENSRNOP00000018032	0	0	0	0	0.063	0.505	0	0.353	0.674
Actn4	Trpc6	5047195	5040224	10116.ENSRNOP00000027773	10116.ENSRNOP00000008905	0	0	0	0	0	0	0	0.674	0.674
Homer1	Grin1	5058316	5047721	10116.ENSRNOP00000065989	10116.ENSRNOP00000029227	0	0	0	0	0.058	0.51	0	0.35	0.674
Cox6c	Ndufb4	5042199	5038473	10116.ENSRNOP00000014407	10116.ENSRNOP00000003674	0	0	0	0	0.555	0	0	0.296	0.673
Sema6c	Celsr3	5052958	5050505	10116.ENSRNOP00000050221	10116.ENSRNOP00000041011	0	0	0	0	0.063	0	0	0.666	0.673
Srsf11	Prpf38b	5051112	5047179	10116.ENSRNOP00000043202	10116.ENSRNOP00000027738	0	0	0	0	0.673	0	0	0	0.673
Rsrc2	rCG_37337	5054067	5046870	10116.ENSRNOP00000054602	10116.ENSRNOP00000026964	0	0	0	0	0.644	0.119	0	0	0.673
Polr1b	Adcy6	5046051	5043011	10116.ENSRNOP00000024882	10116.ENSRNOP00000016624	0	0	0	0	0.064	0	0.65	0.078	0.671
Ncln	Snrnp35	5039664	5037726	10116.ENSRNOP00000007110	10116.ENSRNOP00000001402	0	0	0	0	0.05	0	0	0.668	0.671
Rpl24	LOC499136	5057430	5053259	10116.ENSRNOP00000064870	10116.ENSRNOP00000051281	0	0	0	0	0.231	0.59	0	0	0.671
Adcy5	Polr1b	5051982	5046051	10116.ENSRNOP00000046488	10116.ENSRNOP00000024882	0	0	0	0	0.064	0	0.65	0.078	0.671
Rps29	Eprs	5050429	5048672	10116.ENSRNOP00000040703	10116.ENSRNOP00000033323	0	0	0	0	0.477	0.312	0	0.16	0.671
LOC499136	Uba52	5053259	5046917	10116.ENSRNOP00000051281	10116.ENSRNOP00000027073	0	0	0	0	0.155	0.626	0	0	0.67
Cox7a2	Cox17	5055543	5054464	10116.ENSRNOP00000060398	10116.ENSRNOP00000056297	0	0	0	0	0.399	0	0	0.474	0.67
Nsa2	Rrp15	5045006	5038376	10116.ENSRNOP00000022138	10116.ENSRNOP00000003359	0	0	0	0	0.26	0	0.54	0.111	0.67
LOC684988	Fcf1	5047210	5039380	10116.ENSRNOP00000027803	10116.ENSRNOP00000006297	0.076	0	0	0	0.151	0.614	0	0	0.67
Xrcc1	Mutyh	5046909	5045873	10116.ENSRNOP00000027057	10116.ENSRNOP00000024375	0	0	0	0	0.069	0	0	0.66	0.67
Pes1	Utp3	5039275	5038847	10116.ENSRNOP00000005996	10116.ENSRNOP00000004787	0	0	0	0	0.669	0	0	0	0.669
Btf3	Rps13	5057920	5049430	10116.ENSRNOP00000065473	10116.ENSRNOP00000036690	0	0	0	0	0.468	0	0	0.405	0.669
Ppib	Fkbp11	5045274	5044041	10116.ENSRNOP00000022828	10116.ENSRNOP00000019527	0	0	0	0	0.176	0.225	0	0.524	0.669
Gpaa1	Sharpin	5052957	5043540	10116.ENSRNOP00000050220	10116.ENSRNOP00000018032	0	0	0	0	0.067	0	0	0.659	0.669
Polr1c	Rps2	5046389	5044035	10116.ENSRNOP00000025787	10116.ENSRNOP00000019508	0.083	0	0	0	0.387	0.405	0	0.129	0.669
Vstm4	Adap1	5046967	5037857	10116.ENSRNOP00000027198	10116.ENSRNOP00000001736	0	0	0	0	0	0	0	0.668	0.668
Pde1b	Ak2	5053517	5037333	10116.ENSRNOP00000052147	10116.ENSRNOP00000000134	0	0	0	0	0.05	0	0.65	0.082	0.668
Gabrb3	Gabbr2	5056027	5041205	10116.ENSRNOP00000061969	10116.ENSRNOP00000011573	0	0	0	0	0.064	0	0	0.66	0.668
Slc38a7	Slc36a1	5054906	5043063	10116.ENSRNOP00000058216	10116.ENSRNOP00000016755	0	0	0	0	0.063	0.097	0	0.638	0.667
Utp14a	Polr1b	5053352	5046051	10116.ENSRNOP00000051553	10116.ENSRNOP00000024882	0	0	0	0	0.659	0.045	0	0.058	0.666
Polr1b	Rrp15	5046051	5038376	10116.ENSRNOP00000024882	10116.ENSRNOP00000003359	0	0	0	0	0.652	0.082	0	0	0.666
Eprs	Rpl10a	5048672	5037475	10116.ENSRNOP00000033323	10116.ENSRNOP00000000603	0.098	0	0	0	0.382	0.307	0	0.238	0.666
RGD1566137	Eprs	5050967	5048672	10116.ENSRNOP00000042681	10116.ENSRNOP00000033323	0.098	0	0	0	0.382	0.307	0	0.238	0.666
Trappc1	C2cd2	5053910	5038023	10116.ENSRNOP00000053911	10116.ENSRNOP00000002209	0	0	0	0	0	0	0	0.665	0.665
Plec	Lmnb1	5050258	5043986	10116.ENSRNOP00000040018	10116.ENSRNOP00000019351	0	0	0	0	0.05	0.462	0	0.398	0.665
Erbb4	Pdgfa	5043965	5037868	10116.ENSRNOP00000019283	10116.ENSRNOP00000001775	0	0	0	0	0	0.115	0.6	0.13	0.665
Timm17al1	Tomm40l	5057609	5038798	10116.ENSRNOP00000065084	10116.ENSRNOP00000004641	0	0	0	0	0.408	0.178	0	0.368	0.665
Rpl24	Mrpl2	5057430	5045874	10116.ENSRNOP00000064870	10116.ENSRNOP00000024380	0	0	0	0	0.411	0.421	0	0.098	0.665
Adcy5	Nme4	5051982	5047124	10116.ENSRNOP00000046488	10116.ENSRNOP00000027593	0.043	0	0	0	0.063	0	0.65	0.058	0.664
Nme4	Adcy6	5047124	5043011	10116.ENSRNOP00000027593	10116.ENSRNOP00000016624	0.043	0	0	0	0.063	0	0.65	0.058	0.664
Fcgr3a	Aif1	5051103	5037635	10116.ENSRNOP00000043183	10116.ENSRNOP00000001135	0	0	0	0	0.638	0	0	0.106	0.663
Rpl24	Pes1	5057430	5039275	10116.ENSRNOP00000064870	10116.ENSRNOP00000005996	0	0	0	0	0.53	0.307	0	0.049	0.663
Kcnq2	Ank3	5051247	5051233	10116.ENSRNOP00000043732	10116.ENSRNOP00000043687	0	0	0	0	0.064	0	0	0.655	0.663
Prim1	Nme3	5056301	5044815	10116.ENSRNOP00000062827	10116.ENSRNOP00000021650	0	0	0	0	0.077	0	0.65	0	0.663
Psmc4	Rpl23	5046403	5039094	10116.ENSRNOP00000025819	10116.ENSRNOP00000005471	0	0	0.254	0	0.566	0.043	0	0	0.663
Prim1	Nme4	5056301	5047124	10116.ENSRNOP00000062827	10116.ENSRNOP00000027593	0	0	0	0	0.077	0	0.65	0	0.663
Csrp2	Actn4	5055835	5047195	10116.ENSRNOP00000061356	10116.ENSRNOP00000027773	0	0	0	0	0.53	0.236	0	0.136	0.662
Tmem126a	Ssbp1	5048524	5042853	10116.ENSRNOP00000032681	10116.ENSRNOP00000016217	0	0	0	0	0.609	0.171	0	0	0.662
Uqcrq	Sfxn3	5057601	5044639	10116.ENSRNOP00000065074	10116.ENSRNOP00000021171	0	0	0	0	0.063	0.652	0	0.048	0.662
Ppib	Sec11a	5045274	5042487	10116.ENSRNOP00000022828	10116.ENSRNOP00000015218	0	0	0	0	0.662	0	0	0	0.662
Rps29	mrpl11	5050429	5046924	10116.ENSRNOP00000040703	10116.ENSRNOP00000027091	0.079	0	0	0	0.354	0.395	0	0.172	0.662
Nme4	Znrd1	5047124	5037588	10116.ENSRNOP00000027593	10116.ENSRNOP00000001012	0	0	0	0	0.063	0.05	0.65	0	0.661
Nme3	Znrd1	5044815	5037588	10116.ENSRNOP00000021650	10116.ENSRNOP00000001012	0	0	0	0	0.063	0.05	0.65	0	0.661
Polr1c	Adcy6	5046389	5043011	10116.ENSRNOP00000025787	10116.ENSRNOP00000016624	0	0	0	0	0	0	0.65	0.072	0.661
Adcy5	Polr1c	5051982	5046389	10116.ENSRNOP00000046488	10116.ENSRNOP00000025787	0	0	0	0	0	0	0.65	0.072	0.661
Txn2	Prdx5	5055640	5047574	10116.ENSRNOP00000060694	10116.ENSRNOP00000028687	0	0	0	0	0.108	0.24	0	0.54	0.661
Nme1	Znrd1	5038468	5037588	10116.ENSRNOP00000003658	10116.ENSRNOP00000001012	0	0	0	0	0.064	0.05	0.65	0	0.661
Adarb2	Adar	5052229	5047367	10116.ENSRNOP00000047468	10116.ENSRNOP00000028181	0	0	0	0.712	0	0.558	0	0.821	0.661
Eif2s2	Eif4a2	5045638	5038104	10116.ENSRNOP00000023786	10116.ENSRNOP00000002484	0	0	0	0	0.492	0.067	0	0.341	0.66
Mrpl2	Rpl10a	5045874	5037475	10116.ENSRNOP00000024380	10116.ENSRNOP00000000603	0.082	0	0	0	0.379	0.399	0	0.126	0.66
RGD1566137	Mrpl2	5050967	5045874	10116.ENSRNOP00000042681	10116.ENSRNOP00000024380	0.082	0	0	0	0.379	0.399	0	0.126	0.66
Wdr45b	Atg9a	5053414	5046371	10116.ENSRNOP00000051801	10116.ENSRNOP00000025740	0	0	0	0	0.142	0	0	0.62	0.66
Polr2g	Nme3	5046605	5044815	10116.ENSRNOP00000026313	10116.ENSRNOP00000021650	0.044	0	0	0	0.063	0	0.65	0	0.659
Rbm39	Slc2a13	5055501	5044628	10116.ENSRNOP00000060273	10116.ENSRNOP00000021153	0	0	0	0	0.063	0.652	0	0	0.659
rCG_37337	Slc2a13	5046870	5044628	10116.ENSRNOP00000026964	10116.ENSRNOP00000021153	0	0	0	0	0.063	0.652	0	0	0.659
Nme4	Polr2g	5047124	5046605	10116.ENSRNOP00000027593	10116.ENSRNOP00000026313	0.044	0	0	0	0.063	0	0.65	0	0.659
Ank3	Cntn2	5051233	5041419	10116.ENSRNOP00000043687	10116.ENSRNOP00000012190	0	0	0	0	0.082	0.272	0	0.529	0.658
Dlg2	Begain	5053544	5052819	10116.ENSRNOP00000052268	10116.ENSRNOP00000049699	0	0	0	0	0.148	0.191	0	0.544	0.658
Wdr12	Wdr89	5045528	5039588	10116.ENSRNOP00000023463	10116.ENSRNOP00000006860	0	0	0	0	0.645	0	0	0.078	0.658
Pafah2	Chpt1	5048918	5039723	10116.ENSRNOP00000034439	10116.ENSRNOP00000007305	0	0	0	0	0.063	0	0.65	0	0.658
Shank1	Grm5	5046515	5044980	10116.ENSRNOP00000026100	10116.ENSRNOP00000022059	0	0	0	0	0.225	0	0	0.577	0.658
Adcy6	Nme1	5043011	5038468	10116.ENSRNOP00000016624	10116.ENSRNOP00000003658	0.043	0	0	0	0	0	0.65	0.058	0.656
Ntrk2	Hap1	5051759	5044415	10116.ENSRNOP00000045635	10116.ENSRNOP00000020603	0	0	0	0	0.106	0.498	0	0.296	0.656
Txn2	Cox4i1	5055640	5045724	10116.ENSRNOP00000060694	10116.ENSRNOP00000024033	0	0	0	0	0.541	0.051	0	0.275	0.656
Adcy5	Nme3	5051982	5044815	10116.ENSRNOP00000046488	10116.ENSRNOP00000021650	0.043	0	0	0	0	0	0.65	0.058	0.656
Adcy5	Nme1	5051982	5038468	10116.ENSRNOP00000046488	10116.ENSRNOP00000003658	0.043	0	0	0	0	0	0.65	0.058	0.656
Nme3	Adcy6	5044815	5043011	10116.ENSRNOP00000021650	10116.ENSRNOP00000016624	0.043	0	0	0	0	0	0.65	0.058	0.656
Gas7	Afap1	5059574	5040757	10116.ENSRNOP00000067551	10116.ENSRNOP00000010346	0	0	0	0	0	0	0	0.655	0.655
Igfbp5	Igf1r	5045552	5043960	10116.ENSRNOP00000023530	10116.ENSRNOP00000019267	0	0	0	0	0.063	0	0	0.647	0.655
Cct2	Etf1	5047722	5046645	10116.ENSRNOP00000029234	10116.ENSRNOP00000026398	0	0	0	0	0.629	0	0	0.109	0.655
Srek1	Prpf38b	5052648	5047179	10116.ENSRNOP00000049050	10116.ENSRNOP00000027738	0	0	0	0	0.655	0	0	0	0.655
Csf1	Igf1r	5046180	5043960	10116.ENSRNOP00000025221	10116.ENSRNOP00000019267	0	0	0	0	0	0	0.6	0.172	0.655
LOC684988	Mrpl2	5047210	5045874	10116.ENSRNOP00000027803	10116.ENSRNOP00000024380	0	0	0	0	0.386	0.407	0	0.13	0.655
Rps4x	mrpl11	5059880	5046924	10116.ENSRNOP00000067969	10116.ENSRNOP00000027091	0	0	0	0	0.395	0.408	0	0.115	0.655
Rps13	Mrpl2	5049430	5045874	10116.ENSRNOP00000036690	10116.ENSRNOP00000024380	0	0	0	0	0.386	0.407	0	0.13	0.655
LOC679683	mrpl11	5053664	5046924	10116.ENSRNOP00000052873	10116.ENSRNOP00000027091	0.082	0	0	0	0.372	0.398	0	0.123	0.654
mrpl11	Rps23	5046924	5045083	10116.ENSRNOP00000027091	10116.ENSRNOP00000022348	0.082	0	0	0	0.372	0.398	0	0.123	0.654
Rps14	mrpl11	5054455	5046924	10116.ENSRNOP00000056260	10116.ENSRNOP00000027091	0.082	0	0	0	0.372	0.398	0	0.123	0.654
mrpl11	Rpl23	5046924	5039094	10116.ENSRNOP00000027091	10116.ENSRNOP00000005471	0.082	0	0	0	0.372	0.398	0	0.123	0.654
Rpl3	mrpl11	5055630	5046924	10116.ENSRNOP00000060662	10116.ENSRNOP00000027091	0.082	0	0	0	0.372	0.398	0	0.123	0.654
Rps19	Etf1	5058962	5046645	10116.ENSRNOP00000066808	10116.ENSRNOP00000026398	0	0	0	0	0.125	0.621	0	0	0.654
Cs	Rpe	5049027	5043225	10116.ENSRNOP00000034921	10116.ENSRNOP00000017197	0.053	0	0	0	0.063	0	0	0.64	0.653
Adcy5	Polr2g	5051982	5046605	10116.ENSRNOP00000046488	10116.ENSRNOP00000026313	0	0	0	0	0.05	0	0.65	0	0.653
Slc2a3	Hk2	5041100	5040192	10116.ENSRNOP00000011298	10116.ENSRNOP00000008813	0	0	0	0	0.064	0	0	0.644	0.653
Rpl24	Nsa2	5057430	5045006	10116.ENSRNOP00000064870	10116.ENSRNOP00000022138	0	0	0	0	0.396	0.397	0	0.125	0.653
Polr2g	Adcy6	5046605	5043011	10116.ENSRNOP00000026313	10116.ENSRNOP00000016624	0	0	0	0	0.05	0	0.65	0	0.653
Zdhhc5	Cldnd1	5040518	5038040	10116.ENSRNOP00000009708	10116.ENSRNOP00000002260	0	0	0	0	0	0.652	0	0	0.652
Gmppa	Dnpep	5046914	5046808	10116.ENSRNOP00000027064	10116.ENSRNOP00000026799	0	0	0	0	0.153	0	0	0.605	0.652
Rps3	Ppib	5045692	5045274	10116.ENSRNOP00000023935	10116.ENSRNOP00000022828	0	0	0	0	0.625	0.088	0	0.066	0.652
Eprs	Rps23	5048672	5045083	10116.ENSRNOP00000033323	10116.ENSRNOP00000022348	0.083	0	0	0	0.339	0.317	0	0.26	0.652
Yipf5	Yipf1	5050680	5042096	10116.ENSRNOP00000041654	10116.ENSRNOP00000014091	0	0	0	0	0.086	0.443	0	0.372	0.652
Sf3a2	Slc2a13	5046556	5044628	10116.ENSRNOP00000026202	10116.ENSRNOP00000021153	0	0	0	0	0	0.652	0	0	0.652
Cox7a2	Rplp1	5055543	5042729	10116.ENSRNOP00000060398	10116.ENSRNOP00000015893	0	0	0	0	0.651	0	0	0	0.651
Utp14a	Wdr12	5053352	5045528	10116.ENSRNOP00000051553	10116.ENSRNOP00000023463	0	0	0	0	0.631	0	0	0.094	0.651
Rab8a	Trappc3	5044477	5042188	10116.ENSRNOP00000020748	10116.ENSRNOP00000014383	0	0	0	0	0.064	0.114	0	0.612	0.65
Rpl3	Nsa2	5055630	5045006	10116.ENSRNOP00000060662	10116.ENSRNOP00000022138	0	0	0	0	0.348	0.405	0	0.171	0.65
Pak1ip1	Nsa2	5048726	5045006	10116.ENSRNOP00000033583	10116.ENSRNOP00000022138	0	0	0	0	0.53	0	0	0.286	0.65
Adcy5	Znrd1	5051982	5037588	10116.ENSRNOP00000046488	10116.ENSRNOP00000001012	0	0	0	0	0	0	0.65	0	0.65
Rpl36	Eprs	5055066	5048672	10116.ENSRNOP00000058934	10116.ENSRNOP00000033323	0	0	0	0	0.335	0.307	0	0.301	0.65
Tef	Hexim1	5046579	5038678	10116.ENSRNOP00000026258	10116.ENSRNOP00000004272	0	0	0	0	0.063	0	0	0.642	0.65
Adcy6	Znrd1	5043011	5037588	10116.ENSRNOP00000016624	10116.ENSRNOP00000001012	0	0	0	0	0	0	0.65	0	0.65
Rps14	Fcf1	5054455	5039380	10116.ENSRNOP00000056260	10116.ENSRNOP00000006297	0	0	0	0	0.094	0.629	0	0	0.649
Rps24	Mrpl2	5055202	5045874	10116.ENSRNOP00000059382	10116.ENSRNOP00000024380	0	0	0	0	0.388	0.407	0	0.111	0.649
Sumo1	Ggh	5044974	5040538	10116.ENSRNOP00000022048	10116.ENSRNOP00000009758	0	0	0	0	0.063	0	0	0.64	0.648
Rps24	Fcf1	5055202	5039380	10116.ENSRNOP00000059382	10116.ENSRNOP00000006297	0.092	0	0	0	0.095	0.607	0	0	0.648
Rps23	Nsa2	5045083	5045006	10116.ENSRNOP00000022348	10116.ENSRNOP00000022138	0	0	0	0	0.417	0.376	0	0.11	0.648
Spi1	Ncf1	5042890	5037960	10116.ENSRNOP00000016306	10116.ENSRNOP00000002028	0	0	0	0	0.559	0	0	0.234	0.648
Chchd2	Chchd10	5057786	5048142	10116.ENSRNOP00000065307	10116.ENSRNOP00000031008	0	0	0	0.926	0.627	0.073	0	0.374	0.648
Selt	Txn1	5043606	5042945	10116.ENSRNOP00000018248	10116.ENSRNOP00000016447	0	0	0	0	0.063	0	0	0.64	0.648
Cyhr1	Sharpin	5044159	5043540	10116.ENSRNOP00000019852	10116.ENSRNOP00000018032	0	0	0	0	0.064	0	0	0.639	0.647
Rasgrp1	Cacna1e	5039858	5038563	10116.ENSRNOP00000007687	10116.ENSRNOP00000003928	0	0	0	0	0.13	0	0.6	0.068	0.647
Rbfox2	Atxn1	5056504	5045402	10116.ENSRNOP00000063462	10116.ENSRNOP00000023140	0	0	0	0	0	0.066	0	0.638	0.647
Rps4x	Nsa2	5059880	5045006	10116.ENSRNOP00000067969	10116.ENSRNOP00000022138	0	0	0	0	0.385	0.397	0	0.125	0.647
Myoz3	Trpc6	5046473	5040224	10116.ENSRNOP00000025989	10116.ENSRNOP00000008905	0	0	0	0	0	0	0	0.647	0.647
Shank2	Lphn1	5058013	5050952	10116.ENSRNOP00000065594	10116.ENSRNOP00000042610	0	0	0	0	0.064	0.499	0	0.307	0.647
Uqcrq	MGC95210	5057601	5047837	10116.ENSRNOP00000065074	10116.ENSRNOP00000029802	0	0	0	0	0.604	0.145	0	0	0.646
Blcap	Adar	5048261	5047367	10116.ENSRNOP00000031525	10116.ENSRNOP00000028181	0	0	0	0	0.063	0	0	0.637	0.646
Rims4	Pigy	5042232	5040253	10116.ENSRNOP00000014499	10116.ENSRNOP00000008973	0	0	0	0	0	0	0	0.646	0.646
Insr	Fgf22	5055460	5041331	10116.ENSRNOP00000060141	10116.ENSRNOP00000011936	0	0	0	0	0	0.055	0.6	0.14	0.646
Nrxn2	Cadm3	5056551	5038791	10116.ENSRNOP00000063600	10116.ENSRNOP00000004613	0	0	0	0	0.239	0	0	0.555	0.646
Cct2	Polr1c	5047722	5046389	10116.ENSRNOP00000029234	10116.ENSRNOP00000025787	0.044	0	0	0	0.608	0	0	0.13	0.645
Timm8b	Grpel1	5041771	5040233	10116.ENSRNOP00000013188	10116.ENSRNOP00000008930	0	0	0	0	0.422	0.044	0	0.41	0.645
LOC684988	Utp3	5047210	5038847	10116.ENSRNOP00000027803	10116.ENSRNOP00000004787	0	0	0	0	0.101	0.614	0	0.057	0.644
Igf1r	Tsc2	5043960	5042855	10116.ENSRNOP00000019267	10116.ENSRNOP00000016221	0	0	0	0	0.063	0.101	0	0.611	0.644
Ntrk2	Grin1	5051759	5047721	10116.ENSRNOP00000045635	10116.ENSRNOP00000029227	0	0	0	0	0.26	0.082	0	0.518	0.644
Cntnap1	Cadm3	5047096	5038791	10116.ENSRNOP00000027505	10116.ENSRNOP00000004613	0	0	0	0	0.125	0	0	0.609	0.643
Eif2s2	Zc3h15	5045638	5039712	10116.ENSRNOP00000023786	10116.ENSRNOP00000007276	0	0	0	0	0.622	0.094	0	0	0.643
Rab11a	Lamp2	5042618	5037352	10116.ENSRNOP00000015598	10116.ENSRNOP00000000177	0	0	0	0	0.064	0	0	0.634	0.643
Zfand3	Uba52	5052401	5046917	10116.ENSRNOP00000048094	10116.ENSRNOP00000027073	0	0	0	0	0.077	0.629	0	0	0.642
Bola1	Cml1	5047606	5044635	10116.ENSRNOP00000028767	10116.ENSRNOP00000021167	0	0	0	0	0.063	0	0	0.634	0.642
Bbs7	Ift46	5044736	5043873	10116.ENSRNOP00000021453	10116.ENSRNOP00000019011	0	0	0	0	0.064	0	0	0.632	0.641
Arf3	Rab11a	5052323	5042618	10116.ENSRNOP00000047811	10116.ENSRNOP00000015598	0	0	0	0	0.064	0.53	0	0.251	0.641
Eif4e	Etf1	5056576	5046645	10116.ENSRNOP00000063699	10116.ENSRNOP00000026398	0	0	0	0	0.39	0	0	0.436	0.641
Rpl24	Wdr12	5057430	5045528	10116.ENSRNOP00000064870	10116.ENSRNOP00000023463	0	0	0	0	0.4	0.317	0	0.196	0.641
Hibch	Mrpl2	5048379	5045874	10116.ENSRNOP00000032041	10116.ENSRNOP00000024380	0	0	0	0	0.118	0.61	0	0	0.641
Ntrk2	Pdgfa	5051759	5037868	10116.ENSRNOP00000045635	10116.ENSRNOP00000001775	0	0	0	0	0	0	0.6	0.139	0.641
Rpl35a	Rpl9	5054353	5048515	10116.ENSRNOP00000055825	10116.ENSRNOP00000032635	0	0	0	0	0.358	0.421	0	0.113	0.641
Tbce	Tuba1c	5050969	5044544	10116.ENSRNOP00000042689	10116.ENSRNOP00000020932	0	0	0	0	0.064	0.527	0	0.255	0.641
Insr	Csf1	5055460	5046180	10116.ENSRNOP00000060141	10116.ENSRNOP00000025221	0	0	0	0	0	0	0.6	0.137	0.64
Rps14	Utp14a	5054455	5053352	10116.ENSRNOP00000056260	10116.ENSRNOP00000051553	0	0	0	0	0.07	0.608	0	0.093	0.64
Trnau1ap	Selt	5058099	5043606	10116.ENSRNOP00000065702	10116.ENSRNOP00000018248	0	0	0	0	0	0	0	0.64	0.64
Adar	Azin1	5047367	5039954	10116.ENSRNOP00000028181	10116.ENSRNOP00000007999	0	0	0	0	0	0	0	0.64	0.64
S100a1	Ppig	5043155	5040708	10116.ENSRNOP00000017000	10116.ENSRNOP00000010216	0	0	0	0	0	0.604	0	0.128	0.639
Sf3a2	Prepl	5046556	5040499	10116.ENSRNOP00000026202	10116.ENSRNOP00000009660	0	0	0	0	0	0	0	0.638	0.638
Rpl36	Mrpl2	5055066	5045874	10116.ENSRNOP00000058934	10116.ENSRNOP00000024380	0	0	0	0	0.377	0.399	0	0.112	0.638
Csf1	Erbb4	5046180	5043965	10116.ENSRNOP00000025221	10116.ENSRNOP00000019283	0	0	0	0	0	0	0.6	0.131	0.637
Ntrk2	Csf1	5051759	5046180	10116.ENSRNOP00000045635	10116.ENSRNOP00000025221	0	0	0	0	0	0	0.6	0.13	0.637
Rps3	Eif4a2	5045692	5038104	10116.ENSRNOP00000023935	10116.ENSRNOP00000002484	0	0	0	0	0.486	0.137	0	0.249	0.637
Rps14	Utp3	5054455	5038847	10116.ENSRNOP00000056260	10116.ENSRNOP00000004787	0	0	0	0	0.064	0.629	0	0	0.637
Rpl24	Eprs	5057430	5048672	10116.ENSRNOP00000064870	10116.ENSRNOP00000033323	0	0	0	0	0.432	0.377	0	0.059	0.637
Uimc1	Brca2	5045223	5037752	10116.ENSRNOP00000022704	10116.ENSRNOP00000001475	0	0	0	0	0.063	0	0	0.628	0.637
Gfpt1	Ogt	5046130	5038814	10116.ENSRNOP00000025070	10116.ENSRNOP00000004692	0.118	0	0	0	0.05	0	0	0.6	0.636
Gorasp1	Rab2a	5045883	5040110	10116.ENSRNOP00000024408	10116.ENSRNOP00000008522	0	0	0	0	0.063	0.109	0	0.599	0.636
Dnpep	Rnpep	5046808	5040335	10116.ENSRNOP00000026799	10116.ENSRNOP00000009198	0	0	0	0	0.11	0	0	0.608	0.636
Slc2a13	Wdr83	5044628	5039253	10116.ENSRNOP00000021153	10116.ENSRNOP00000005917	0	0	0	0	0	0.635	0	0	0.635
Timm17a	Tomm40l	5040405	5038798	10116.ENSRNOP00000009398	10116.ENSRNOP00000004641	0	0	0	0	0.408	0.178	0	0.311	0.635
Tef	Clock	5046579	5038261	10116.ENSRNOP00000026258	10116.ENSRNOP00000002976	0	0	0	0	0.05	0.109	0	0.603	0.635
Slc2a13	Sde2	5044628	5038712	10116.ENSRNOP00000021153	10116.ENSRNOP00000004350	0	0	0	0	0	0.635	0	0	0.635
Rpl36	LOC499136	5055066	5053259	10116.ENSRNOP00000058934	10116.ENSRNOP00000051281	0	0	0	0	0.346	0.466	0	0	0.635
Syngap1	Dlgap3	5051341	5043945	10116.ENSRNOP00000044041	10116.ENSRNOP00000019214	0	0	0	0	0.195	0.283	0	0.417	0.634
Cx3cl1	Il18	5045002	5041735	10116.ENSRNOP00000022128	10116.ENSRNOP00000013093	0	0	0	0	0	0	0	0.634	0.634
Dlg4	Cntnap1	5055096	5047096	10116.ENSRNOP00000059045	10116.ENSRNOP00000027505	0	0	0	0	0.154	0.273	0	0.453	0.634
Rexo4	Ftsj3	5051170	5041818	10116.ENSRNOP00000043432	10116.ENSRNOP00000013295	0	0	0	0	0.629	0	0	0.054	0.634
Nubp2	Pfdn6	5044378	5037459	10116.ENSRNOP00000020504	10116.ENSRNOP00000000553	0	0	0	0	0.079	0.618	0	0	0.633
LOC679683	Eprs	5053664	5048672	10116.ENSRNOP00000052873	10116.ENSRNOP00000033323	0.069	0	0	0	0.386	0.317	0	0.172	0.633
Rpl24	mrpl11	5057430	5046924	10116.ENSRNOP00000064870	10116.ENSRNOP00000027091	0	0	0	0	0.371	0.408	0	0.094	0.633
Rps14	Eprs	5054455	5048672	10116.ENSRNOP00000056260	10116.ENSRNOP00000033323	0.069	0	0	0	0.386	0.317	0	0.172	0.633
Pip5k1c	Ppm1f	5054820	5038126	10116.ENSRNOP00000057873	10116.ENSRNOP00000002530	0	0	0	0	0.576	0.148	0	0.065	0.633
Ppig	Pitpna	5040708	5039060	10116.ENSRNOP00000010216	10116.ENSRNOP00000005368	0	0	0	0	0.063	0	0	0.625	0.633
Gpx6	Selt	5054196	5043606	10116.ENSRNOP00000055070	10116.ENSRNOP00000018248	0	0	0	0	0	0	0	0.633	0.633
Ndufs5	Cox7a2l2	5049650	5049574	10116.ENSRNOP00000037699	10116.ENSRNOP00000037372	0	0	0	0	0.31	0.218	0	0.372	0.632
Pcyox1	Pigy	5045157	5040253	10116.ENSRNOP00000022532	10116.ENSRNOP00000008973	0	0	0	0	0	0	0	0.632	0.632
Tnr	Slc6a1	5059921	5040516	10116.ENSRNOP00000068101	10116.ENSRNOP00000009705	0	0	0	0	0.632	0	0	0	0.632
Shank3	Grin1	5050529	5047721	10116.ENSRNOP00000041083	10116.ENSRNOP00000029227	0	0	0	0	0.063	0.284	0	0.496	0.632
Caskin1	Ss18l1	5050236	5041103	10116.ENSRNOP00000039956	10116.ENSRNOP00000011306	0	0	0	0	0.063	0	0	0.623	0.631
Pxn	Nudcd2	5051310	5038706	10116.ENSRNOP00000043928	10116.ENSRNOP00000004339	0	0	0	0	0	0.631	0	0	0.631
Zfand3	Gmds	5052401	5045613	10116.ENSRNOP00000048094	10116.ENSRNOP00000023691	0	0	0	0	0	0	0	0.631	0.631
Wdr45b	Gabarapl2	5053414	5050265	10116.ENSRNOP00000051801	10116.ENSRNOP00000040067	0	0	0	0	0.064	0	0	0.622	0.631
Homer1	Shank2	5058316	5058013	10116.ENSRNOP00000065989	10116.ENSRNOP00000065594	0	0	0	0	0	0.078	0	0.615	0.63
Polr1c	Pes1	5046389	5039275	10116.ENSRNOP00000025787	10116.ENSRNOP00000005996	0	0	0	0	0.62	0	0	0.066	0.63
Rbm39	Srek1	5055501	5052648	10116.ENSRNOP00000060273	10116.ENSRNOP00000049050	0	0	0	0.567	0.191	0.502	0	0.307	0.63
Rps4x	Utp14a	5059880	5053352	10116.ENSRNOP00000067969	10116.ENSRNOP00000051553	0	0	0	0	0.1	0.599	0	0.058	0.63
Rpl14	Cct2	5055953	5047722	10116.ENSRNOP00000061747	10116.ENSRNOP00000029234	0	0	0	0	0.537	0.046	0	0.23	0.63
Etf1	Zc3h15	5046645	5039712	10116.ENSRNOP00000026398	10116.ENSRNOP00000007276	0	0	0	0	0.602	0.109	0	0	0.63
Timm8b	Ndufb4	5041771	5038473	10116.ENSRNOP00000013188	10116.ENSRNOP00000003674	0	0	0	0	0.629	0	0	0	0.629
Polr1b	Tcea1	5046051	5040961	10116.ENSRNOP00000024882	10116.ENSRNOP00000010893	0	0	0	0	0.064	0.407	0	0.385	0.629
Cntnap1	Ncoa2	5047096	5041011	10116.ENSRNOP00000027505	10116.ENSRNOP00000011026	0	0	0	0	0	0	0	0.629	0.629
Pus1	Slc25a38	5053852	5046153	10116.ENSRNOP00000053623	10116.ENSRNOP00000025142	0	0	0	0	0	0	0	0.629	0.629
Rps14	Psmc4	5054455	5046403	10116.ENSRNOP00000056260	10116.ENSRNOP00000025819	0	0	0.323	0	0.466	0	0	0.058	0.629
Rexo4	Wdr12	5051170	5045528	10116.ENSRNOP00000043432	10116.ENSRNOP00000023463	0	0	0	0	0.629	0	0	0	0.629
LOC679683	Psmc4	5053664	5046403	10116.ENSRNOP00000052873	10116.ENSRNOP00000025819	0	0	0.322	0	0.466	0	0	0.058	0.629
Dazap1	Dnpep	5051866	5046808	10116.ENSRNOP00000046032	10116.ENSRNOP00000026799	0	0	0	0	0.063	0	0	0.619	0.628
Epn1	Igf1r	5044680	5043960	10116.ENSRNOP00000021286	10116.ENSRNOP00000019267	0	0	0	0	0.05	0.068	0.6	0.076	0.628
Rpl3	Cct2	5055630	5047722	10116.ENSRNOP00000060662	10116.ENSRNOP00000029234	0	0	0	0	0.585	0.047	0	0.134	0.628
Cox17	Cox7a2l2	5054464	5049574	10116.ENSRNOP00000056297	10116.ENSRNOP00000037372	0	0	0	0	0.323	0	0	0.474	0.628
Rpl24	Ncl	5057430	5045990	10116.ENSRNOP00000064870	10116.ENSRNOP00000024712	0	0	0	0	0.091	0.601	0	0.057	0.628
Sel1l	Ube2j2	5051121	5046791	10116.ENSRNOP00000043232	10116.ENSRNOP00000026752	0	0	0	0	0	0	0	0.628	0.628
Mrpl2	Rps27	5045874	5045301	10116.ENSRNOP00000024380	10116.ENSRNOP00000022897	0	0	0	0	0.362	0.399	0	0.107	0.627
Utp14a	LOC684988	5053352	5047210	10116.ENSRNOP00000051553	10116.ENSRNOP00000027803	0	0	0	0	0.123	0.593	0	0	0.627
Mutyh	Afap1	5045873	5040757	10116.ENSRNOP00000024375	10116.ENSRNOP00000010346	0	0	0	0	0	0	0	0.627	0.627
Rnf40	Uchl5	5046285	5038878	10116.ENSRNOP00000025500	10116.ENSRNOP00000004881	0	0	0	0	0.063	0.528	0	0.225	0.627
Rps3	Nme1	5045692	5038468	10116.ENSRNOP00000023935	10116.ENSRNOP00000003658	0	0	0	0	0.525	0.135	0	0.16	0.625
Cct2	Sqle	5047722	5041669	10116.ENSRNOP00000029234	10116.ENSRNOP00000012883	0	0	0	0	0	0.044	0	0.623	0.625
Cs	Hk2	5049027	5040192	10116.ENSRNOP00000034921	10116.ENSRNOP00000008813	0	0	0	0	0.093	0	0	0.603	0.625
Rps4x	Utp3	5059880	5038847	10116.ENSRNOP00000067969	10116.ENSRNOP00000004787	0	0	0	0	0.064	0.616	0	0	0.625
Rps4x	Fcf1	5059880	5039380	10116.ENSRNOP00000067969	10116.ENSRNOP00000006297	0	0	0	0	0.064	0.616	0	0	0.625
Bace1	Furin	5045259	5042591	10116.ENSRNOP00000022796	10116.ENSRNOP00000015521	0	0	0	0	0.094	0.205	0	0.52	0.624
Ppib	Hmbs	5045274	5042106	10116.ENSRNOP00000022828	10116.ENSRNOP00000014128	0.082	0	0	0	0.415	0	0	0.355	0.623
Hibch	Mrpl44	5048379	5044353	10116.ENSRNOP00000032041	10116.ENSRNOP00000020420	0	0	0	0	0.068	0.61	0	0.048	0.623
Eprs	Pes1	5048672	5039275	10116.ENSRNOP00000033323	10116.ENSRNOP00000005996	0	0	0	0	0.548	0.201	0	0	0.623
Rps14	LOC499136	5054455	5053259	10116.ENSRNOP00000056260	10116.ENSRNOP00000051281	0	0	0	0	0.081	0.59	0	0.08	0.623
Rasgrp1	Cacnb1	5039858	5039308	10116.ENSRNOP00000007687	10116.ENSRNOP00000006098	0	0	0	0	0.059	0	0.6	0.08	0.623
Qrsl1	Dars2	5043828	5038528	10116.ENSRNOP00000018891	10116.ENSRNOP00000003828	0.12	0	0	0	0.122	0.42	0	0.259	0.623
Rps24	mrpl11	5055202	5046924	10116.ENSRNOP00000059382	10116.ENSRNOP00000027091	0	0	0	0	0.354	0.395	0	0.113	0.623
LOC679683	LOC499136	5053664	5053259	10116.ENSRNOP00000052873	10116.ENSRNOP00000051281	0	0	0	0	0.081	0.59	0	0.08	0.623
Gabbr2	Kcnj9	5041205	5040669	10116.ENSRNOP00000011573	10116.ENSRNOP00000010113	0	0	0	0	0.21	0.114	0	0.503	0.622
Ndufs6	Ndufaf3	5058869	5047000	10116.ENSRNOP00000066688	10116.ENSRNOP00000027262	0	0	0	0	0.133	0	0	0.582	0.622
Slc2a13	Msi1	5044628	5037772	10116.ENSRNOP00000021153	10116.ENSRNOP00000001532	0	0	0	0	0.081	0.606	0	0	0.622
Cct2	Rpl23	5047722	5039094	10116.ENSRNOP00000029234	10116.ENSRNOP00000005471	0	0	0.26	0	0.478	0.044	0	0.097	0.622
Gabbr2	Gabra1	5041205	5038829	10116.ENSRNOP00000011573	10116.ENSRNOP00000004725	0	0	0	0	0.222	0	0	0.534	0.622
Coq7	Ifrd2	5045342	5044990	10116.ENSRNOP00000022988	10116.ENSRNOP00000022092	0	0	0	0	0	0	0	0.622	0.622
Rps25	Mrpl2	5048636	5045874	10116.ENSRNOP00000033144	10116.ENSRNOP00000024380	0	0	0	0	0.365	0.396	0	0.094	0.622
Cul5	Dcaf8	5040982	5040239	10116.ENSRNOP00000010956	10116.ENSRNOP00000008944	0	0	0	0	0.063	0.059	0.54	0.177	0.621
Trnau1ap	Ncbp1	5058099	5049893	10116.ENSRNOP00000065702	10116.ENSRNOP00000038713	0	0	0	0	0.064	0.588	0	0.097	0.621
Rpl36a	Mrpl2	5052640	5045874	10116.ENSRNOP00000049014	10116.ENSRNOP00000024380	0	0	0	0	0.351	0.395	0	0.113	0.621
Tmem126a	Ndufaf3	5048524	5047000	10116.ENSRNOP00000032681	10116.ENSRNOP00000027262	0	0	0	0	0.148	0	0	0.574	0.621
Etf1	Eif2s2	5046645	5045638	10116.ENSRNOP00000026398	10116.ENSRNOP00000023786	0	0	0	0	0.552	0.184	0	0.045	0.621
Fkbp11	Ppig	5044041	5040708	10116.ENSRNOP00000019527	10116.ENSRNOP00000010216	0	0	0	0	0	0.114	0	0.589	0.621
Ddx39a	Etf1	5050417	5046645	10116.ENSRNOP00000040666	10116.ENSRNOP00000026398	0	0	0	0	0.569	0	0	0.154	0.62
Sema6b	Celsr3	5059666	5050505	10116.ENSRNOP00000067668	10116.ENSRNOP00000041011	0	0	0	0	0.064	0	0	0.61	0.62
LOC684988	mrpl11	5047210	5046924	10116.ENSRNOP00000027803	10116.ENSRNOP00000027091	0	0	0	0	0.349	0.395	0	0.113	0.62
Rps14	Hnrpd	5054455	5051983	10116.ENSRNOP00000056260	10116.ENSRNOP00000046491	0	0	0	0	0.064	0.245	0	0.506	0.62
Rps13	mrpl11	5049430	5046924	10116.ENSRNOP00000036690	10116.ENSRNOP00000027091	0	0	0	0	0.349	0.395	0	0.113	0.62
Polr1c	Rpl23	5046389	5039094	10116.ENSRNOP00000025787	10116.ENSRNOP00000005471	0.095	0	0	0	0.523	0	0	0.191	0.62
Bambi	Fst	5044878	5042643	10116.ENSRNOP00000021801	10116.ENSRNOP00000015680	0	0	0	0	0.063	0	0	0.611	0.62
Rps24	Utp3	5055202	5038847	10116.ENSRNOP00000059382	10116.ENSRNOP00000004787	0	0	0	0	0.064	0.607	0	0.049	0.619
Hp	Serpina5	5052635	5041752	10116.ENSRNOP00000049003	10116.ENSRNOP00000013138	0	0	0	0	0.149	0.134	0	0.525	0.619
Eprs	Coq3	5048672	5041849	10116.ENSRNOP00000033323	10116.ENSRNOP00000013384	0.118	0	0	0	0.119	0	0	0.55	0.619
Srsf11	rCG_37337	5051112	5046870	10116.ENSRNOP00000043202	10116.ENSRNOP00000026964	0	0	0	0	0.244	0.502	0	0.066	0.618
Vti1a	Epn1	5055075	5044680	10116.ENSRNOP00000058953	10116.ENSRNOP00000021286	0	0	0	0	0	0.557	0	0.172	0.617
Dlat	Slc2a13	5048573	5044628	10116.ENSRNOP00000032890	10116.ENSRNOP00000021153	0	0	0	0	0.063	0.609	0	0	0.617
Carm1	Creb1	5050984	5043622	10116.ENSRNOP00000042739	10116.ENSRNOP00000018326	0	0	0	0	0.045	0.511	0	0.246	0.617
Lysmd3	Desi2	5044885	5039267	10116.ENSRNOP00000021818	10116.ENSRNOP00000005967	0	0	0	0	0.617	0	0	0	0.617
Uqcrh	Krcc1	5043060	5040381	10116.ENSRNOP00000016751	10116.ENSRNOP00000009327	0	0	0	0	0.617	0	0	0	0.617
Ndufs6	Mpc2	5058869	5038655	10116.ENSRNOP00000066688	10116.ENSRNOP00000004206	0	0	0	0	0.244	0	0	0.514	0.617
Trpv1	Aif1	5046679	5037635	10116.ENSRNOP00000026493	10116.ENSRNOP00000001135	0	0	0	0	0	0.308	0	0.468	0.616
Ppp1r14b	Nubp2	5050441	5044378	10116.ENSRNOP00000040750	10116.ENSRNOP00000020504	0	0	0	0	0.063	0.608	0	0	0.616
Dlg4	Kcnj10	5055096	5040682	10116.ENSRNOP00000059045	10116.ENSRNOP00000010146	0	0	0	0	0.118	0.396	0	0.338	0.616
Trnau1ap	Isy1	5058099	5041915	10116.ENSRNOP00000065702	10116.ENSRNOP00000013571	0	0	0	0	0	0.407	0	0.38	0.616
MGC95210	Cox6c	5047837	5042199	10116.ENSRNOP00000029802	10116.ENSRNOP00000014407	0	0	0	0	0.616	0	0	0	0.616
Mecp2	Shank3	5053749	5050529	10116.ENSRNOP00000053166	10116.ENSRNOP00000041083	0	0	0	0	0.062	0	0	0.607	0.616
Eprs	mrpl11	5048672	5046924	10116.ENSRNOP00000033323	10116.ENSRNOP00000027091	0.099	0	0	0	0.211	0.301	0	0.319	0.616
Homer1	Syngap1	5058316	5051341	10116.ENSRNOP00000065989	10116.ENSRNOP00000044041	0	0	0	0	0	0.283	0	0.486	0.615
LOC294154	Uba52	5054435	5046917	10116.ENSRNOP00000056183	10116.ENSRNOP00000027073	0	0	0	0	0	0.615	0	0	0.615
Pofut1	Jag1	5041960	5040872	10116.ENSRNOP00000013730	10116.ENSRNOP00000010638	0	0	0	0	0.049	0.143	0	0.565	0.615
Kcnq2	Uba52	5051247	5046917	10116.ENSRNOP00000043732	10116.ENSRNOP00000027073	0	0	0	0	0.37	0.402	0	0.059	0.614
Uba52	Kcna3	5046917	5045871	10116.ENSRNOP00000027073	10116.ENSRNOP00000024372	0	0	0	0	0.37	0.402	0	0.059	0.614
Rpl3	Eif4a2	5055630	5038104	10116.ENSRNOP00000060662	10116.ENSRNOP00000002484	0	0	0	0	0.538	0.163	0	0.083	0.614
Uba52	Kcnd3	5046917	5044214	10116.ENSRNOP00000027073	10116.ENSRNOP00000019997	0	0	0	0	0.37	0.402	0	0.059	0.614
Lphn1	Lrrc6	5050952	5039704	10116.ENSRNOP00000042610	10116.ENSRNOP00000007250	0	0	0	0	0	0.613	0	0.042	0.613
Kif1b	Tuba1c	5052694	5044544	10116.ENSRNOP00000049243	10116.ENSRNOP00000020932	0	0	0	0	0.05	0.604	0	0.056	0.613
Polr1b	Zc3h15	5046051	5039712	10116.ENSRNOP00000024882	10116.ENSRNOP00000007276	0	0	0	0	0.584	0.109	0	0	0.613
Polr1c	Rrp15	5046389	5038376	10116.ENSRNOP00000025787	10116.ENSRNOP00000003359	0	0	0	0	0.613	0	0	0	0.613
Kcnip3	Grin1	5052360	5047721	10116.ENSRNOP00000047927	10116.ENSRNOP00000029227	0	0	0	0	0.153	0.312	0	0.387	0.612
mrpl11	Rpl10a	5046924	5037475	10116.ENSRNOP00000027091	10116.ENSRNOP00000000603	0.076	0	0	0	0.386	0.321	0	0.111	0.612
Rps24	Utp14a	5055202	5053352	10116.ENSRNOP00000059382	10116.ENSRNOP00000051553	0	0	0	0	0.121	0.556	0	0.087	0.612
Rpl3	Rrp15	5055630	5038376	10116.ENSRNOP00000060662	10116.ENSRNOP00000003359	0	0	0	0	0.123	0.464	0	0.24	0.611
Mxd3	Max	5044938	5040980	10116.ENSRNOP00000021946	10116.ENSRNOP00000010954	0	0	0	0	0	0.453	0	0.319	0.611
Caskin1	Apba1	5050236	5044258	10116.ENSRNOP00000039956	10116.ENSRNOP00000020123	0	0	0	0	0.138	0	0	0.567	0.611
Nox1	P4hb	5058322	5053439	10116.ENSRNOP00000065995	10116.ENSRNOP00000051841	0	0	0	0	0.063	0.063	0	0.592	0.611
Rpl24	Rrp15	5057430	5038376	10116.ENSRNOP00000064870	10116.ENSRNOP00000003359	0	0	0	0	0.456	0.306	0	0.054	0.611
Etf1	Eif5	5046645	5041947	10116.ENSRNOP00000026398	10116.ENSRNOP00000013695	0	0	0	0	0.44	0.114	0	0.279	0.611
Clstn3	Cadm3	5042609	5038791	10116.ENSRNOP00000015570	10116.ENSRNOP00000004613	0	0	0	0	0.152	0	0	0.558	0.61
Naglt1	Tmem180	5053946	5052711	10116.ENSRNOP00000054044	10116.ENSRNOP00000049314	0	0	0	0	0.064	0	0	0.6	0.61
Lifr	Pdgfa	5042779	5037868	10116.ENSRNOP00000016036	10116.ENSRNOP00000001775	0	0	0	0	0	0	0.6	0.063	0.609
Ndufs6	Cox6b2	5058869	5049174	10116.ENSRNOP00000066688	10116.ENSRNOP00000035591	0	0	0	0	0.516	0.067	0	0.204	0.609
Dync1li2	Tuba1c	5047802	5044544	10116.ENSRNOP00000029646	10116.ENSRNOP00000020932	0	0	0	0	0.064	0	0.6	0	0.609
Pip5k1c	Actn4	5054820	5047195	10116.ENSRNOP00000057873	10116.ENSRNOP00000027773	0	0	0	0	0.064	0	0.6	0	0.609
Hmbs	Sqle	5042106	5041669	10116.ENSRNOP00000014128	10116.ENSRNOP00000012883	0.086	0	0	0	0.064	0	0	0.579	0.609
Grin1	Aif1	5047721	5037635	10116.ENSRNOP00000029227	10116.ENSRNOP00000001135	0	0	0	0	0	0.477	0	0.281	0.608
Insr	Gab2	5055460	5042911	10116.ENSRNOP00000060141	10116.ENSRNOP00000016361	0	0	0	0	0	0.055	0.6	0.047	0.608
Abcc8	Pcsk2	5047577	5039703	10116.ENSRNOP00000028696	10116.ENSRNOP00000007249	0.044	0	0	0	0.1	0.057	0	0.574	0.608
Insr	Pdgfa	5055460	5037868	10116.ENSRNOP00000060141	10116.ENSRNOP00000001775	0	0	0	0	0	0	0.6	0.06	0.607
Utp14a	Ogt	5053352	5038814	10116.ENSRNOP00000051553	10116.ENSRNOP00000004692	0	0	0	0	0.086	0	0	0.588	0.607
Mtpn	Abhd12	5042694	5040874	10116.ENSRNOP00000015808	10116.ENSRNOP00000010640	0	0	0	0	0.607	0	0	0	0.607
Gnas	Grm5	5048618	5044980	10116.ENSRNOP00000033065	10116.ENSRNOP00000022059	0	0	0	0	0.059	0	0.6	0	0.607
Ank3	Plec	5051233	5050258	10116.ENSRNOP00000043687	10116.ENSRNOP00000040018	0	0	0	0	0.083	0.544	0	0.135	0.607
Mrpl2	Rplp1	5045874	5042729	10116.ENSRNOP00000024380	10116.ENSRNOP00000015893	0	0	0	0	0.361	0.4	0	0.058	0.607
Slc23a2	Slc2a3	5047642	5041100	10116.ENSRNOP00000028885	10116.ENSRNOP00000011298	0	0	0	0	0.063	0	0	0.598	0.607
Rplp2	Mrpl2	5049776	5045874	10116.ENSRNOP00000038214	10116.ENSRNOP00000024380	0	0	0	0	0.361	0.4	0	0.058	0.607
Ncbp1	Cct2	5049893	5047722	10116.ENSRNOP00000038713	10116.ENSRNOP00000029234	0	0	0	0	0.607	0	0	0	0.607
Grpel1	Tomm40l	5040233	5038798	10116.ENSRNOP00000008930	10116.ENSRNOP00000004641	0	0	0	0	0.4	0	0	0.371	0.606
Tyrobp	Csf1	5047405	5046180	10116.ENSRNOP00000028284	10116.ENSRNOP00000025221	0	0	0	0	0.063	0	0	0.597	0.606
Cd79b	Traf3ip3	5042761	5039843	10116.ENSRNOP00000015977	10116.ENSRNOP00000007649	0	0	0	0	0.606	0	0	0	0.606
Slc6a1	Gabra1	5040516	5038829	10116.ENSRNOP00000009705	10116.ENSRNOP00000004725	0	0	0	0	0.247	0.049	0	0.492	0.605
Eprs	Mrpl2	5048672	5045874	10116.ENSRNOP00000033323	10116.ENSRNOP00000024380	0.044	0	0	0	0.307	0.312	0	0.237	0.605
Ugcg	B3galt4	5044613	5037457	10116.ENSRNOP00000021110	10116.ENSRNOP00000000550	0	0	0	0	0	0	0	0.605	0.605
Rpl36	Nsa2	5055066	5045006	10116.ENSRNOP00000058934	10116.ENSRNOP00000022138	0	0	0	0	0.351	0.313	0	0.185	0.605
Golga2	Rab11a	5042903	5042618	10116.ENSRNOP00000016341	10116.ENSRNOP00000015598	0	0	0	0	0.064	0.044	0	0.594	0.605
Arrdc3	Txn1	5059659	5042945	10116.ENSRNOP00000067658	10116.ENSRNOP00000016447	0	0	0	0	0	0.395	0	0.373	0.605
Srm	Asl	5042376	5037658	10116.ENSRNOP00000014934	10116.ENSRNOP00000001211	0	0	0	0	0.049	0	0	0.601	0.604
Il4r	Pdgfa	5044566	5037868	10116.ENSRNOP00000020994	10116.ENSRNOP00000001775	0	0	0	0	0	0	0.6	0.051	0.604
Cnot10	Fcf1	5041992	5039380	10116.ENSRNOP00000013817	10116.ENSRNOP00000006297	0	0	0	0	0.063	0	0	0.595	0.604
Gna13	Grm5	5053469	5044980	10116.ENSRNOP00000051938	10116.ENSRNOP00000022059	0	0	0	0	0	0.051	0.6	0.042	0.604
Gtf2h2	Mre11a	5054827	5041687	10116.ENSRNOP00000057895	10116.ENSRNOP00000012940	0	0	0	0	0.05	0	0	0.601	0.604
Akr7a2	Def8	5045736	5037382	10116.ENSRNOP00000024063	10116.ENSRNOP00000000281	0	0	0	0	0.074	0	0	0.589	0.604
Vhl	Cul5	5041958	5040982	10116.ENSRNOP00000013727	10116.ENSRNOP00000010956	0	0	0	0	0	0.376	0	0.391	0.604
LOC679683	Nsa2	5053664	5045006	10116.ENSRNOP00000052873	10116.ENSRNOP00000022138	0	0	0	0	0.344	0.376	0	0.108	0.602
Atg9a	Vmp1	5046371	5039159	10116.ENSRNOP00000025740	10116.ENSRNOP00000005658	0	0	0	0	0.063	0	0	0.593	0.602
Rps14	Nsa2	5054455	5045006	10116.ENSRNOP00000056260	10116.ENSRNOP00000022138	0	0	0	0	0.344	0.376	0	0.108	0.602
Pus1	Ftsj3	5053852	5041818	10116.ENSRNOP00000053623	10116.ENSRNOP00000013295	0	0	0	0	0.505	0	0	0.229	0.602
Dlg4	Bace1	5055096	5045259	10116.ENSRNOP00000059045	10116.ENSRNOP00000022796	0	0	0	0	0.086	0	0	0.583	0.602
Drg1	Cand2	5046189	5042132	10116.ENSRNOP00000025241	10116.ENSRNOP00000014207	0	0	0	0	0.05	0.599	0	0	0.602
Rps24	Psmc4	5055202	5046403	10116.ENSRNOP00000059382	10116.ENSRNOP00000025819	0	0	0	0	0.566	0	0	0.122	0.602
Smarca2	Tbp	5043057	5037965	10116.ENSRNOP00000016740	10116.ENSRNOP00000002038	0	0	0	0	0.064	0.423	0	0.322	0.601
Arrb1	Olr851	5051878	5050036	10116.ENSRNOP00000046069	10116.ENSRNOP00000039243	0	0	0	0	0	0	0.6	0	0.6
Arrb1	Olr149	5051878	5045348	10116.ENSRNOP00000046069	10116.ENSRNOP00000023002	0	0	0	0	0	0	0.6	0	0.6
Crtc1	Atf2	5048120	5038012	10116.ENSRNOP00000030925	10116.ENSRNOP00000002174	0	0	0	0	0	0	0.6	0	0.6
Arrb1	Olr1626	5051878	5043029	10116.ENSRNOP00000046069	10116.ENSRNOP00000016667	0	0	0	0	0	0	0.6	0	0.6
Arrb1	Olr1595	5051878	5038810	10116.ENSRNOP00000046069	10116.ENSRNOP00000004677	0	0	0	0	0	0	0.6	0	0.6
Olr745	Arrb1	5053147	5051878	10116.ENSRNOP00000050923	10116.ENSRNOP00000046069	0	0	0	0	0	0	0.6	0	0.6
F2r	Gnas	5058039	5048618	10116.ENSRNOP00000065624	10116.ENSRNOP00000033065	0	0	0	0	0	0	0.6	0	0.6
Arrb1	Olr488	5051878	5041683	10116.ENSRNOP00000046069	10116.ENSRNOP00000012929	0	0	0	0	0	0	0.6	0	0.6
Olr1126	Arrb1	5054868	5051878	10116.ENSRNOP00000058043	10116.ENSRNOP00000046069	0	0	0	0	0	0	0.6	0	0.6
Olr670	Arrb1	5052971	5051878	10116.ENSRNOP00000050258	10116.ENSRNOP00000046069	0	0	0	0	0	0	0.6	0	0.6
Cct2	Rps2	5047722	5044035	10116.ENSRNOP00000029234	10116.ENSRNOP00000019508	0	0	0	0	0.518	0	0	0.206	0.6
Actn4	Pip4k2b	5047195	5043519	10116.ENSRNOP00000027773	10116.ENSRNOP00000017989	0	0	0	0	0	0	0.6	0	0.6
Arrb1	Olr144	5051878	5045249	10116.ENSRNOP00000046069	10116.ENSRNOP00000022773	0	0	0	0	0	0	0.6	0	0.6
Il11ra1	Pdgfa	5044526	5037868	10116.ENSRNOP00000020885	10116.ENSRNOP00000001775	0	0	0	0	0	0	0.6	0	0.6
Olr1163	Arrb1	5053278	5051878	10116.ENSRNOP00000051324	10116.ENSRNOP00000046069	0	0	0	0	0	0	0.6	0	0.6
Olr1536	Arrb1	5054769	5051878	10116.ENSRNOP00000057614	10116.ENSRNOP00000046069	0	0	0	0	0	0	0.6	0	0.6
Olr1076	Arrb1	5054667	5051878	10116.ENSRNOP00000057200	10116.ENSRNOP00000046069	0	0	0	0	0	0	0.6	0	0.6
Arrb1	Olr792	5051878	5051038	10116.ENSRNOP00000046069	10116.ENSRNOP00000042947	0	0	0	0	0	0	0.6	0	0.6
Olr349	Arrb1	5056854	5051878	10116.ENSRNOP00000064152	10116.ENSRNOP00000046069	0	0	0	0	0	0	0.6	0	0.6
Trpv1	Grpr	5046679	5039125	10116.ENSRNOP00000026493	10116.ENSRNOP00000005559	0	0	0	0	0	0	0	0.599	0.599
Rnf40	Cul5	5046285	5040982	10116.ENSRNOP00000025500	10116.ENSRNOP00000010956	0	0	0	0	0.064	0	0	0.59	0.599
Grm5	Gabra1	5044980	5038829	10116.ENSRNOP00000022059	10116.ENSRNOP00000004725	0	0	0	0	0.264	0	0	0.476	0.598
Ap2b1	Eif4h	5060044	5051128	10116.ENSRNOP00000068516	10116.ENSRNOP00000043254	0	0	0	0	0.597	0	0	0	0.597
Dlg2	Grin1	5053544	5047721	10116.ENSRNOP00000052268	10116.ENSRNOP00000029227	0	0	0	0	0.198	0.193	0	0.428	0.597
Gabbr2	Slc6a1	5041205	5040516	10116.ENSRNOP00000011573	10116.ENSRNOP00000009705	0	0	0	0	0.223	0	0	0.503	0.597
Rbfox2	Txn2	5056504	5055640	10116.ENSRNOP00000063462	10116.ENSRNOP00000060694	0	0	0	0	0	0	0	0.597	0.597
Kpna5	Ncbp1	5050129	5049893	10116.ENSRNOP00000039571	10116.ENSRNOP00000038713	0	0	0	0	0.076	0.564	0	0.079	0.596
Cyp51	Aacs	5040616	5037686	10116.ENSRNOP00000009985	10116.ENSRNOP00000001292	0	0	0	0	0.543	0	0	0.152	0.596
Dlat	Pgam2	5048573	5043598	10116.ENSRNOP00000032890	10116.ENSRNOP00000018227	0.082	0	0	0	0.093	0	0	0.554	0.596
Tmem180	Sv2c	5052711	5045908	10116.ENSRNOP00000049314	10116.ENSRNOP00000024459	0	0	0	0	0	0	0	0.596	0.596
Utp14a	Pak1ip1	5053352	5048726	10116.ENSRNOP00000051553	10116.ENSRNOP00000033583	0	0	0	0	0.542	0	0	0.152	0.595
Nsa2	Rpl23	5045006	5039094	10116.ENSRNOP00000022138	10116.ENSRNOP00000005471	0	0	0	0	0.374	0.376	0	0.048	0.595
Il18	Aif1	5041735	5037635	10116.ENSRNOP00000013093	10116.ENSRNOP00000001135	0	0	0	0	0.163	0	0	0.536	0.595
Cox4i1	Endog	5045724	5044762	10116.ENSRNOP00000024033	10116.ENSRNOP00000021531	0	0	0	0	0.17	0.167	0	0.461	0.595
Ednra	Nos3	5054170	5041726	10116.ENSRNOP00000054967	10116.ENSRNOP00000013058	0	0	0	0	0.07	0.044	0	0.581	0.595
Dlg4	Kcna3	5055096	5045871	10116.ENSRNOP00000059045	10116.ENSRNOP00000024372	0	0	0	0	0.064	0.321	0	0.414	0.595
Srek1	Sf3a2	5052648	5046556	10116.ENSRNOP00000049050	10116.ENSRNOP00000026202	0	0	0	0	0.064	0	0	0.586	0.595
Crtc1	Hcn2	5048120	5041299	10116.ENSRNOP00000030925	10116.ENSRNOP00000011837	0	0	0	0	0.595	0	0	0	0.595
Nlgn2	Syngap1	5053871	5051341	10116.ENSRNOP00000053713	10116.ENSRNOP00000044041	0	0	0	0	0.21	0	0	0.509	0.595
Grin1	Creb1	5047721	5043622	10116.ENSRNOP00000029227	10116.ENSRNOP00000018326	0	0	0	0	0	0	0	0.594	0.594
Rpl14	Ftsj3	5055953	5041818	10116.ENSRNOP00000061747	10116.ENSRNOP00000013295	0	0	0	0	0.106	0.558	0	0.057	0.594
Ftsj3	Fcf1	5041818	5039380	10116.ENSRNOP00000013295	10116.ENSRNOP00000006297	0	0	0	0	0.545	0	0	0.146	0.594
Slc25a38	Hmbs	5046153	5042106	10116.ENSRNOP00000025142	10116.ENSRNOP00000014128	0	0	0	0	0.063	0	0	0.585	0.594
Cct2	Wdr12	5047722	5045528	10116.ENSRNOP00000029234	10116.ENSRNOP00000023463	0	0	0	0	0.573	0	0	0.089	0.594
Etf1	Drg1	5046645	5046189	10116.ENSRNOP00000026398	10116.ENSRNOP00000025241	0	0	0	0	0.587	0	0	0.059	0.594
Cbfb	Utp3	5044096	5038847	10116.ENSRNOP00000019656	10116.ENSRNOP00000004787	0	0	0	0	0.064	0.317	0	0.416	0.594
Aif1	Selplg	5037635	5037563	10116.ENSRNOP00000001135	10116.ENSRNOP00000000888	0	0	0	0	0.127	0	0	0.553	0.594
Vti1a	Rab11a	5055075	5042618	10116.ENSRNOP00000058953	10116.ENSRNOP00000015598	0	0	0	0	0.064	0	0	0.584	0.594
Rpl14	LOC499136	5055953	5053259	10116.ENSRNOP00000061747	10116.ENSRNOP00000051281	0	0	0	0	0.123	0.557	0	0	0.594
Sct	Adcyap1r1	5045753	5042833	10116.ENSRNOP00000024094	10116.ENSRNOP00000016175	0	0	0	0	0	0.085	0	0.574	0.593
Etf1	Mrpl2	5046645	5045874	10116.ENSRNOP00000026398	10116.ENSRNOP00000024380	0.042	0	0	0	0.119	0.557	0	0	0.593
Blcap	Rbbp9	5048261	5040886	10116.ENSRNOP00000031525	10116.ENSRNOP00000010678	0	0	0	0	0	0	0	0.592	0.592
Zdhhc20	Ppm1f	5055333	5038126	10116.ENSRNOP00000059785	10116.ENSRNOP00000002530	0	0	0	0	0.064	0	0	0.582	0.592
Uqcrq	Mrpl2	5057601	5045874	10116.ENSRNOP00000065074	10116.ENSRNOP00000024380	0	0	0	0	0.573	0	0	0.082	0.592
Rps13	Cct2	5049430	5047722	10116.ENSRNOP00000036690	10116.ENSRNOP00000029234	0	0	0	0	0.567	0	0	0.095	0.591
Uxs1	Ndst1	5058363	5046430	10116.ENSRNOP00000066044	10116.ENSRNOP00000025881	0	0	0	0	0	0	0	0.591	0.591
RGD1306730	Plcg2	5047145	5043756	10116.ENSRNOP00000027644	10116.ENSRNOP00000018678	0	0	0	0	0	0.591	0	0	0.591
Gata3	Il4r	5046550	5044566	10116.ENSRNOP00000026187	10116.ENSRNOP00000020994	0	0	0	0	0	0	0	0.591	0.591
Cct2	LOC684988	5047722	5047210	10116.ENSRNOP00000029234	10116.ENSRNOP00000027803	0	0	0	0	0.567	0	0	0.095	0.591
Cox4i1	Ndufb4	5045724	5038473	10116.ENSRNOP00000024033	10116.ENSRNOP00000003674	0	0	0	0	0.521	0	0	0.18	0.59
Pes1	LOC498154	5039275	5037856	10116.ENSRNOP00000005996	10116.ENSRNOP00000001734	0	0	0	0	0.59	0	0	0	0.59
Endog	Timm17a	5044762	5040405	10116.ENSRNOP00000021531	10116.ENSRNOP00000009398	0	0	0	0	0.114	0	0	0.556	0.59
Rbm39	Srsf11	5055501	5051112	10116.ENSRNOP00000060273	10116.ENSRNOP00000043202	0	0	0	0	0.191	0.502	0	0.066	0.59
Ndufs6	MGC95210	5058869	5047837	10116.ENSRNOP00000066688	10116.ENSRNOP00000029802	0	0	0	0	0.533	0	0	0.157	0.589
Os9	Cct2	5051576	5047722	10116.ENSRNOP00000044914	10116.ENSRNOP00000029234	0	0	0	0	0	0	0	0.589	0.589
Os9	Ube2j2	5051576	5046791	10116.ENSRNOP00000044914	10116.ENSRNOP00000026752	0	0	0	0	0	0.043	0	0.588	0.589
Polr1c	Wars	5046389	5039319	10116.ENSRNOP00000025787	10116.ENSRNOP00000006128	0	0	0	0	0.557	0	0	0.112	0.589
MGC95210	Uqcrh	5047837	5043060	10116.ENSRNOP00000029802	10116.ENSRNOP00000016751	0	0	0	0	0.531	0	0	0.159	0.588
U2af1l4	Snrnp35	5050608	5037726	10116.ENSRNOP00000041377	10116.ENSRNOP00000001402	0	0	0	0	0.171	0.42	0	0.212	0.588
Timm23	Ssbp1	5046858	5042853	10116.ENSRNOP00000026932	10116.ENSRNOP00000016217	0	0	0	0	0.381	0.307	0	0.117	0.588
Nrn1	Vgf	5059016	5052906	10116.ENSRNOP00000066878	10116.ENSRNOP00000050024	0	0	0	0	0.134	0	0	0.544	0.588
Slc12a5	Slc6a1	5056075	5040516	10116.ENSRNOP00000062103	10116.ENSRNOP00000009705	0.044	0	0	0	0.244	0	0	0.475	0.588
Spi1	Traf3ip3	5042890	5039843	10116.ENSRNOP00000016306	10116.ENSRNOP00000007649	0	0	0	0	0.588	0	0	0	0.588
Dlg4	Sharpin	5055096	5043540	10116.ENSRNOP00000059045	10116.ENSRNOP00000018032	0	0	0	0	0	0.472	0	0.25	0.587
Pigy	Mif4gd	5040253	5039001	10116.ENSRNOP00000008973	10116.ENSRNOP00000005198	0	0	0	0	0	0	0	0.586	0.586
LOC679683	Cct2	5053664	5047722	10116.ENSRNOP00000052873	10116.ENSRNOP00000029234	0.042	0	0	0	0.561	0	0	0.096	0.586
Tmem132d	Enoph1	5041063	5038298	10116.ENSRNOP00000011181	10116.ENSRNOP00000003083	0	0	0	0	0	0	0	0.586	0.586
Prrc1	Scrn1	5044966	5041733	10116.ENSRNOP00000022021	10116.ENSRNOP00000013088	0	0	0	0	0	0	0	0.586	0.586
Dhrs7b	Csrp2	5056591	5055835	10116.ENSRNOP00000063744	10116.ENSRNOP00000061356	0	0	0	0	0	0	0	0.586	0.586
Rps14	Cct2	5054455	5047722	10116.ENSRNOP00000056260	10116.ENSRNOP00000029234	0.042	0	0	0	0.561	0	0	0.096	0.586
Eprs	Tomm40l	5048672	5038798	10116.ENSRNOP00000033323	10116.ENSRNOP00000004641	0	0	0	0	0.567	0.085	0	0	0.586
MGC114529	Abhd1	5048992	5040388	10116.ENSRNOP00000034773	10116.ENSRNOP00000009339	0	0	0	0	0	0	0	0.586	0.586
Srek1	Ddx39a	5052648	5050417	10116.ENSRNOP00000049050	10116.ENSRNOP00000040666	0	0	0	0	0.142	0.068	0	0.523	0.585
Rcan3	Cabin1	5046125	5037826	10116.ENSRNOP00000025052	10116.ENSRNOP00000001659	0	0	0	0	0	0	0	0.585	0.585
Eif2s2	Dars	5045638	5038974	10116.ENSRNOP00000023786	10116.ENSRNOP00000005127	0	0	0	0	0.569	0	0	0.077	0.585
Mlec	Dcaf8	5049154	5040239	10116.ENSRNOP00000035497	10116.ENSRNOP00000008944	0	0	0	0	0	0	0	0.585	0.585
Rps13	RGD1311703	5049430	5047169	10116.ENSRNOP00000036690	10116.ENSRNOP00000027702	0	0	0	0	0	0	0	0.585	0.585
Eprs	Zc3h15	5048672	5039712	10116.ENSRNOP00000033323	10116.ENSRNOP00000007276	0	0	0	0	0.585	0	0	0	0.585
Gfpt1	Alg14	5046130	5042533	10116.ENSRNOP00000025070	10116.ENSRNOP00000015355	0	0	0	0	0.064	0	0	0.575	0.585
LOC684988	RGD1311703	5047210	5047169	10116.ENSRNOP00000027803	10116.ENSRNOP00000027702	0	0	0	0	0	0	0	0.584	0.584
Pcyox1	Pitpna	5045157	5039060	10116.ENSRNOP00000022532	10116.ENSRNOP00000005368	0	0	0	0	0.05	0	0	0.581	0.584
RGD1566137	mrpl11	5050967	5046924	10116.ENSRNOP00000042681	10116.ENSRNOP00000027091	0.076	0	0	0	0.343	0.321	0	0.111	0.584
Ap2b1	Ppm1f	5060044	5038126	10116.ENSRNOP00000068516	10116.ENSRNOP00000002530	0	0	0	0	0.583	0	0	0	0.583
Grip2	Shank1	5050508	5046515	10116.ENSRNOP00000041016	10116.ENSRNOP00000026100	0	0	0	0	0.134	0.116	0	0.499	0.583
Timm17a	Mpc2	5040405	5038655	10116.ENSRNOP00000009398	10116.ENSRNOP00000004206	0	0	0	0	0.168	0.462	0	0.144	0.583
Gas7	Gmds	5059574	5045613	10116.ENSRNOP00000067551	10116.ENSRNOP00000023691	0	0	0	0	0.147	0	0	0.531	0.583
Decr2	Slc2a13	5047101	5044628	10116.ENSRNOP00000027518	10116.ENSRNOP00000021153	0	0	0	0	0.523	0.076	0	0.13	0.583
Btf3	Rpl14	5057920	5055953	10116.ENSRNOP00000065473	10116.ENSRNOP00000061747	0	0	0	0	0.529	0	0	0.149	0.582
LOC499136	Rps25	5053259	5048636	10116.ENSRNOP00000051281	10116.ENSRNOP00000033144	0	0	0	0	0.267	0.453	0	0	0.581
Cct2	Rplp1	5047722	5042729	10116.ENSRNOP00000029234	10116.ENSRNOP00000015893	0	0	0	0	0.548	0	0	0.112	0.581
Ap2b1	Pip4k2b	5060044	5043519	10116.ENSRNOP00000068516	10116.ENSRNOP00000017989	0	0	0	0	0.063	0.556	0	0.075	0.581
Rps10	Nsa2	5055923	5045006	10116.ENSRNOP00000061642	10116.ENSRNOP00000022138	0	0	0	0	0.337	0.302	0	0.166	0.581
Timm23	Tomm40l	5046858	5038798	10116.ENSRNOP00000026932	10116.ENSRNOP00000004641	0	0	0	0	0.22	0.216	0	0.37	0.581
LOC499136	Rps13	5053259	5049430	10116.ENSRNOP00000051281	10116.ENSRNOP00000036690	0	0	0	0	0.18	0.511	0	0	0.581
Trnau1ap	RGD1304704	5058099	5052673	10116.ENSRNOP00000065702	10116.ENSRNOP00000049155	0	0	0	0	0.349	0	0	0.383	0.581
LOC499136	LOC684988	5053259	5047210	10116.ENSRNOP00000051281	10116.ENSRNOP00000027803	0	0	0	0	0.18	0.511	0	0	0.581
Tomm40l	Cct6a	5038798	5037664	10116.ENSRNOP00000004641	10116.ENSRNOP00000001227	0	0	0	0	0.521	0.109	0	0.098	0.581
Dclk1	Msi1	5044128	5037772	10116.ENSRNOP00000019748	10116.ENSRNOP00000001532	0	0	0	0	0.106	0.061	0	0.541	0.581
Paics	Arrb1	5055878	5051878	10116.ENSRNOP00000061495	10116.ENSRNOP00000046069	0	0	0	0	0	0	0	0.58	0.58
Slc38a7	Fam214b	5054906	5041493	10116.ENSRNOP00000058216	10116.ENSRNOP00000012386	0	0	0	0	0.58	0	0	0	0.58
Eprs	Rpl9	5048672	5048515	10116.ENSRNOP00000033323	10116.ENSRNOP00000032635	0	0	0	0	0.357	0.244	0	0.207	0.58
Ikbkg	Cntn2	5053730	5041419	10116.ENSRNOP00000053114	10116.ENSRNOP00000012190	0	0	0	0	0	0.181	0	0.508	0.58
Gabarapl2	Atg9a	5050265	5046371	10116.ENSRNOP00000040067	10116.ENSRNOP00000025740	0	0	0	0	0.064	0.186	0	0.493	0.58
Uqcrh	Nudc	5043060	5040598	10116.ENSRNOP00000016751	10116.ENSRNOP00000009933	0	0	0	0	0.58	0	0	0	0.58
Pak1ip1	LOC498154	5048726	5037856	10116.ENSRNOP00000033583	10116.ENSRNOP00000001734	0	0	0	0	0.58	0	0	0	0.58
Dlg4	Cntn2	5055096	5041419	10116.ENSRNOP00000059045	10116.ENSRNOP00000012190	0	0	0	0	0.181	0.146	0	0.447	0.579
Rpl36a	Nsa2	5052640	5045006	10116.ENSRNOP00000049014	10116.ENSRNOP00000022138	0	0	0	0	0.379	0.307	0	0.099	0.579
Kcnq2	Kcnj9	5051247	5040669	10116.ENSRNOP00000043732	10116.ENSRNOP00000010113	0	0	0	0	0.223	0	0	0.48	0.579
Rps24	Nsa2	5055202	5045006	10116.ENSRNOP00000059382	10116.ENSRNOP00000022138	0	0	0	0	0.361	0.318	0	0.111	0.578
Selt	Chpt1	5043606	5039723	10116.ENSRNOP00000018248	10116.ENSRNOP00000007305	0	0	0	0	0.063	0	0	0.568	0.578
LOC499136	Rpl23	5053259	5039094	10116.ENSRNOP00000051281	10116.ENSRNOP00000005471	0	0	0	0	0.174	0.511	0	0	0.578
Slc2a3	Slc1a4	5041100	5039638	10116.ENSRNOP00000011298	10116.ENSRNOP00000007002	0	0	0	0	0.063	0	0	0.568	0.578
Fgf22	Hcn2	5041331	5041299	10116.ENSRNOP00000011936	10116.ENSRNOP00000011837	0	0	0	0	0.064	0	0	0.567	0.578
Dnajc16	Grpel1	5043248	5040233	10116.ENSRNOP00000017247	10116.ENSRNOP00000008930	0.075	0	0	0	0.15	0.306	0	0.319	0.578
Fxr1	Ncl	5058073	5045990	10116.ENSRNOP00000065667	10116.ENSRNOP00000024712	0	0	0	0	0.064	0.186	0	0.491	0.578
Arih2	Caskin1	5052901	5050236	10116.ENSRNOP00000050012	10116.ENSRNOP00000039956	0	0	0	0	0	0.068	0	0.564	0.577
Utp14a	Rrp15	5053352	5038376	10116.ENSRNOP00000051553	10116.ENSRNOP00000003359	0	0	0	0	0.577	0	0	0	0.577
Psmc4	Rps27	5046403	5045301	10116.ENSRNOP00000025819	10116.ENSRNOP00000022897	0	0	0	0	0.573	0	0	0.048	0.576
Rps4x	LOC499136	5059880	5053259	10116.ENSRNOP00000067969	10116.ENSRNOP00000051281	0	0	0	0	0.086	0.556	0	0	0.576
Myrip	Rims1	5046273	5042567	10116.ENSRNOP00000025460	10116.ENSRNOP00000015454	0	0	0	0	0.118	0	0	0.539	0.576
Slc7a5	Slc36a1	5046388	5043063	10116.ENSRNOP00000025784	10116.ENSRNOP00000016755	0	0	0	0	0	0.044	0	0.574	0.576
Grin1	Dlgap3	5047721	5043945	10116.ENSRNOP00000029227	10116.ENSRNOP00000019214	0	0	0	0	0.244	0.152	0	0.391	0.575
Gls	Slc2a3	5049774	5041100	10116.ENSRNOP00000038205	10116.ENSRNOP00000011298	0.043	0	0	0	0	0	0	0.574	0.575
Txn2	Gpx6	5055640	5054196	10116.ENSRNOP00000060694	10116.ENSRNOP00000055070	0	0	0	0	0	0.139	0	0.527	0.575
Scn2b	Kcnd3	5044886	5044214	10116.ENSRNOP00000021819	10116.ENSRNOP00000019997	0	0	0	0	0.152	0	0	0.519	0.575
Ikbkg	Rab11a	5053730	5042618	10116.ENSRNOP00000053114	10116.ENSRNOP00000015598	0	0	0	0	0	0.148	0	0.522	0.575
Uxs1	Extl3	5058363	5043726	10116.ENSRNOP00000066044	10116.ENSRNOP00000018583	0	0	0	0	0	0	0	0.574	0.574
Kcnj4	Scn2b	5053695	5044886	10116.ENSRNOP00000053014	10116.ENSRNOP00000021819	0	0	0	0	0.239	0	0	0.463	0.574
LOC294154	Stub1	5054435	5046852	10116.ENSRNOP00000056183	10116.ENSRNOP00000026921	0	0	0	0	0	0.494	0	0.194	0.574
Eprs	Rps2	5048672	5044035	10116.ENSRNOP00000033323	10116.ENSRNOP00000019508	0.042	0	0	0	0.416	0.233	0	0.126	0.574
Gas7	Uba52	5059574	5046917	10116.ENSRNOP00000067551	10116.ENSRNOP00000027073	0	0	0	0	0	0.54	0	0.112	0.574
LOC499136	Rps3	5053259	5045692	10116.ENSRNOP00000051281	10116.ENSRNOP00000023935	0	0	0	0	0.078	0.557	0	0	0.574
Tceb1	Tnp2	5059457	5038407	10116.ENSRNOP00000067410	10116.ENSRNOP00000003455	0	0	0	0	0	0.557	0	0.076	0.573
Uqcrq	Aurkaip1	5057601	5046457	10116.ENSRNOP00000065074	10116.ENSRNOP00000025952	0	0	0	0	0.573	0	0	0	0.573
Dnpep	Coq3	5046808	5041849	10116.ENSRNOP00000026799	10116.ENSRNOP00000013384	0.085	0	0	0	0.067	0	0	0.541	0.573
Pak1ip1	Znrd1	5048726	5037588	10116.ENSRNOP00000033583	10116.ENSRNOP00000001012	0	0	0	0	0.573	0	0	0	0.573
Rps4x	Cct2	5059880	5047722	10116.ENSRNOP00000067969	10116.ENSRNOP00000029234	0	0	0	0	0.573	0	0	0	0.573
Rpl35a	Wdr12	5054353	5045528	10116.ENSRNOP00000055825	10116.ENSRNOP00000023463	0	0	0	0	0.145	0.383	0	0.254	0.572
Rnf113a1	Utp3	5052328	5038847	10116.ENSRNOP00000047839	10116.ENSRNOP00000004787	0	0	0	0	0.063	0	0	0.562	0.572
Ublcp1	Uchl5	5039294	5038878	10116.ENSRNOP00000006063	10116.ENSRNOP00000004881	0	0	0	0	0.186	0.181	0	0.409	0.571
Hibch	Krcc1	5048379	5040381	10116.ENSRNOP00000032041	10116.ENSRNOP00000009327	0	0	0	0	0.571	0	0	0	0.571
Pip5k1c	Psmc4	5054820	5046403	10116.ENSRNOP00000057873	10116.ENSRNOP00000025819	0	0	0	0	0.063	0.545	0	0.075	0.571
Arhgdia	Actn4	5053438	5047195	10116.ENSRNOP00000051840	10116.ENSRNOP00000027773	0	0	0	0	0.12	0.057	0	0.524	0.57
LOC499136	RGD1566137	5053259	5050967	10116.ENSRNOP00000051281	10116.ENSRNOP00000042681	0.083	0	0	0	0.088	0.511	0	0.074	0.57
Pdp2	Ppm1f	5042953	5038126	10116.ENSRNOP00000016462	10116.ENSRNOP00000002530	0	0	0	0	0.064	0.074	0	0.543	0.57
Rps19	Cct2	5058962	5047722	10116.ENSRNOP00000066808	10116.ENSRNOP00000029234	0	0	0	0	0.507	0	0	0.163	0.57
LOC499136	Rpl10a	5053259	5037475	10116.ENSRNOP00000051281	10116.ENSRNOP00000000603	0.083	0	0	0	0.088	0.511	0	0.074	0.57
Polr1b	Rps2	5046051	5044035	10116.ENSRNOP00000024882	10116.ENSRNOP00000019508	0.078	0	0	0	0.331	0.308	0	0.112	0.57
Prim1	Mutyh	5056301	5045873	10116.ENSRNOP00000062827	10116.ENSRNOP00000024375	0	0	0	0	0.548	0	0	0.089	0.57
Eif5	Zc3h15	5041947	5039712	10116.ENSRNOP00000013695	10116.ENSRNOP00000007276	0	0	0	0	0.557	0.069	0	0	0.57
Map2k5	Mef2d	5053048	5050523	10116.ENSRNOP00000050528	10116.ENSRNOP00000041061	0	0	0	0	0.063	0.159	0	0.497	0.569
Blcap	Azin1	5048261	5039954	10116.ENSRNOP00000031525	10116.ENSRNOP00000007999	0	0	0	0	0	0	0	0.569	0.569
Rps13	Nsa2	5049430	5045006	10116.ENSRNOP00000036690	10116.ENSRNOP00000022138	0	0	0	0	0.345	0.318	0	0.111	0.568
Nrxn2	Tbkbp1	5056551	5041524	10116.ENSRNOP00000063600	10116.ENSRNOP00000012461	0	0	0	0	0.13	0	0	0.524	0.568
Cct2	Polr1b	5047722	5046051	10116.ENSRNOP00000029234	10116.ENSRNOP00000024882	0	0	0	0	0.533	0	0	0.113	0.568
Adarb2	Blcap	5052229	5048261	10116.ENSRNOP00000047468	10116.ENSRNOP00000031525	0	0	0	0	0	0	0	0.566	0.566
Cct2	Rps23	5047722	5045083	10116.ENSRNOP00000029234	10116.ENSRNOP00000022348	0	0	0	0	0.536	0	0	0.104	0.566
Pak1ip1	Polr1c	5048726	5046389	10116.ENSRNOP00000033583	10116.ENSRNOP00000025787	0	0	0	0	0.566	0	0	0	0.566
Cntnap1	Kcna3	5047096	5045871	10116.ENSRNOP00000027505	10116.ENSRNOP00000024372	0	0	0	0	0.063	0.114	0	0.52	0.566
Hadhb	Abcg1	5042278	5037773	10116.ENSRNOP00000014637	10116.ENSRNOP00000001533	0	0	0	0	0.05	0	0	0.562	0.566
Prom1	Msi1	5038662	5037772	10116.ENSRNOP00000004231	10116.ENSRNOP00000001532	0	0	0	0	0.063	0.048	0	0.553	0.566
Gpx6	Sepw1	5054196	5043718	10116.ENSRNOP00000055070	10116.ENSRNOP00000018559	0	0	0	0	0	0	0	0.566	0.566
Dpm2	Alg14	5057634	5042533	10116.ENSRNOP00000065111	10116.ENSRNOP00000015355	0	0	0	0	0	0	0	0.565	0.565
Paics	Mthfd1	5055878	5040065	10116.ENSRNOP00000061495	10116.ENSRNOP00000008374	0.097	0	0	0	0.238	0	0	0.418	0.565
Timm23	Mrpl44	5046858	5044353	10116.ENSRNOP00000026932	10116.ENSRNOP00000020420	0	0	0	0	0.565	0	0	0	0.565
Gstm5	Gstk1	5057384	5045055	10116.ENSRNOP00000064813	10116.ENSRNOP00000022275	0	0	0	0	0	0	0	0.565	0.565
Nox1	Txn1	5058322	5042945	10116.ENSRNOP00000065995	10116.ENSRNOP00000016447	0	0	0	0	0.08	0.055	0	0.54	0.565
Golga2	Rab2a	5042903	5040110	10116.ENSRNOP00000016341	10116.ENSRNOP00000008522	0	0	0	0	0	0.107	0	0.533	0.565
Irf3	Il18	5047203	5041735	10116.ENSRNOP00000027786	10116.ENSRNOP00000013093	0	0	0	0	0	0	0	0.565	0.565
Tuba1c	Pfdn6	5044544	5037459	10116.ENSRNOP00000020932	10116.ENSRNOP00000000553	0	0	0	0	0.068	0.422	0	0.257	0.564
Utp14a	Rexo4	5053352	5051170	10116.ENSRNOP00000051553	10116.ENSRNOP00000043432	0	0	0	0	0.564	0	0	0	0.564
Kcnq2	Chrnb2	5051247	5047377	10116.ENSRNOP00000043732	10116.ENSRNOP00000028200	0	0	0	0	0.225	0	0	0.461	0.564
Gabrb3	Slc6a1	5056027	5040516	10116.ENSRNOP00000061969	10116.ENSRNOP00000009705	0	0	0	0	0.069	0.069	0	0.538	0.564
Cmbl	Hadhb	5042564	5042278	10116.ENSRNOP00000015448	10116.ENSRNOP00000014637	0.044	0	0	0	0.099	0	0	0.534	0.564
Fcf1	Rrp15	5039380	5038376	10116.ENSRNOP00000006297	10116.ENSRNOP00000003359	0	0	0	0	0.564	0	0	0	0.564
Dlg4	Klhl17	5055096	5047110	10116.ENSRNOP00000059045	10116.ENSRNOP00000027547	0	0	0	0	0.063	0.498	0	0.147	0.563
Polr1c	Tcea1	5046389	5040961	10116.ENSRNOP00000025787	10116.ENSRNOP00000010893	0	0	0	0	0.094	0.421	0	0.234	0.563
Rps10	Cox4i1	5055923	5045724	10116.ENSRNOP00000061642	10116.ENSRNOP00000024033	0	0	0	0	0.524	0	0	0.12	0.563
Ablim2	Afap1	5054209	5040757	10116.ENSRNOP00000055116	10116.ENSRNOP00000010346	0	0	0	0	0.046	0	0	0.56	0.562
Anxa5	Prom1	5044052	5038662	10116.ENSRNOP00000019552	10116.ENSRNOP00000004231	0	0	0	0	0	0	0	0.562	0.562
Tyrobp	Selplg	5047405	5037563	10116.ENSRNOP00000028284	10116.ENSRNOP00000000888	0	0	0	0	0.491	0	0	0.174	0.562
Csf1	Il18	5046180	5041735	10116.ENSRNOP00000025221	10116.ENSRNOP00000013093	0	0	0	0	0	0	0	0.562	0.562
Rab5b	Arf3	5054982	5052323	10116.ENSRNOP00000058595	10116.ENSRNOP00000047811	0	0	0	0	0.101	0.447	0	0.191	0.562
Fyttd1	Eif4a2	5051403	5038104	10116.ENSRNOP00000044272	10116.ENSRNOP00000002484	0	0	0	0	0.55	0.068	0	0	0.562
Ube2i	Uimc1	5045882	5045223	10116.ENSRNOP00000024406	10116.ENSRNOP00000022704	0	0	0	0	0	0.317	0	0.385	0.561
Eprs	Eif4a2	5048672	5038104	10116.ENSRNOP00000033323	10116.ENSRNOP00000002484	0.085	0	0	0	0.468	0.11	0	0.107	0.561
Rpl36a	mrpl11	5052640	5046924	10116.ENSRNOP00000049014	10116.ENSRNOP00000027091	0	0	0	0	0.352	0.313	0	0.094	0.561
Mrpl2	Nsa2	5045874	5045006	10116.ENSRNOP00000024380	10116.ENSRNOP00000022138	0	0	0	0	0.334	0.318	0	0.111	0.56
Cox17	Uqcrh	5054464	5043060	10116.ENSRNOP00000056297	10116.ENSRNOP00000016751	0	0	0	0	0.12	0	0	0.52	0.56
Map4	Tuba1c	5053694	5044544	10116.ENSRNOP00000053011	10116.ENSRNOP00000020932	0	0	0	0	0	0.457	0	0.221	0.559
Mrpl44	Nudc	5044353	5040598	10116.ENSRNOP00000020420	10116.ENSRNOP00000009933	0	0	0	0	0.104	0	0	0.528	0.559
Slc2a3	Slc7a1	5041100	5037667	10116.ENSRNOP00000011298	10116.ENSRNOP00000001234	0	0	0	0	0.091	0.05	0	0.531	0.559
Uba52	Tceb2	5046917	5039605	10116.ENSRNOP00000027073	10116.ENSRNOP00000006892	0	0	0	0	0.559	0	0	0	0.559
Chchd2	Uqcrh	5057786	5043060	10116.ENSRNOP00000065307	10116.ENSRNOP00000016751	0	0	0	0	0.556	0	0	0.049	0.559
Polr1b	Smarca2	5046051	5043057	10116.ENSRNOP00000024882	10116.ENSRNOP00000016740	0	0	0	0	0.063	0.305	0	0.378	0.559
Prpf38b	Snrnp35	5047179	5037726	10116.ENSRNOP00000027738	10116.ENSRNOP00000001402	0	0	0	0	0.079	0	0.54	0	0.558
Rps25	Nsa2	5048636	5045006	10116.ENSRNOP00000033144	10116.ENSRNOP00000022138	0	0	0	0	0.349	0.31	0	0.096	0.558
Etf1	Nsa2	5046645	5045006	10116.ENSRNOP00000026398	10116.ENSRNOP00000022138	0	0	0	0	0.174	0.467	0	0.077	0.558
Timm23	Drg1	5046858	5046189	10116.ENSRNOP00000026932	10116.ENSRNOP00000025241	0	0	0	0	0.558	0	0	0	0.558
Rpl35a	Nsa2	5054353	5045006	10116.ENSRNOP00000055825	10116.ENSRNOP00000022138	0	0	0	0	0.267	0.306	0	0.201	0.558
Dlg4	Rims1	5055096	5042567	10116.ENSRNOP00000059045	10116.ENSRNOP00000015454	0	0	0	0	0.16	0	0	0.496	0.558
Shank2	Sharpin	5058013	5043540	10116.ENSRNOP00000065594	10116.ENSRNOP00000018032	0	0	0	0	0	0	0	0.558	0.558
Egr3	Creb1	5045738	5043622	10116.ENSRNOP00000024066	10116.ENSRNOP00000018326	0	0	0	0	0.05	0.068	0	0.541	0.558
Fxr1	Dlg4	5058073	5055096	10116.ENSRNOP00000065667	10116.ENSRNOP00000059045	0	0	0	0	0	0.192	0	0.474	0.557
Wdr89	Rrp15	5039588	5038376	10116.ENSRNOP00000006860	10116.ENSRNOP00000003359	0	0	0	0	0.557	0	0	0	0.557
Dlg2	Kif13b	5053544	5048484	10116.ENSRNOP00000052268	10116.ENSRNOP00000032499	0	0	0	0	0	0.45	0	0.228	0.557
Rpl3	Eif2s2	5055630	5045638	10116.ENSRNOP00000060662	10116.ENSRNOP00000023786	0	0	0	0	0.557	0	0	0	0.557
Ablim2	Krcc1	5054209	5040381	10116.ENSRNOP00000055116	10116.ENSRNOP00000009327	0	0	0	0	0	0	0	0.557	0.557
LOC684988	Nsa2	5047210	5045006	10116.ENSRNOP00000027803	10116.ENSRNOP00000022138	0	0	0	0	0.328	0.318	0	0.111	0.556
Gabrb3	Shank3	5056027	5050529	10116.ENSRNOP00000061969	10116.ENSRNOP00000041083	0	0	0	0	0.063	0.046	0	0.543	0.556
Deaf1	Ctbs	5052023	5044559	10116.ENSRNOP00000046656	10116.ENSRNOP00000020972	0	0	0	0	0	0	0	0.556	0.556
Rps10	Cct2	5055923	5047722	10116.ENSRNOP00000061642	10116.ENSRNOP00000029234	0	0	0	0	0.299	0	0	0.393	0.556
Dcun1d3	Cul5	5043926	5040982	10116.ENSRNOP00000019167	10116.ENSRNOP00000010956	0	0	0	0	0.086	0.409	0	0.245	0.556
Tada2a	Tbp	5038482	5037965	10116.ENSRNOP00000003699	10116.ENSRNOP00000002038	0	0	0	0	0.064	0.423	0	0.244	0.556
Glrx2	P4hb	5054567	5053439	10116.ENSRNOP00000056811	10116.ENSRNOP00000051841	0.053	0	0	0	0.064	0.177	0	0.462	0.555
Rps19	Mrpl2	5058962	5045874	10116.ENSRNOP00000066808	10116.ENSRNOP00000024380	0	0	0	0	0.328	0.316	0	0.11	0.555
Zbtb38	Zc3h8	5059405	5045657	10116.ENSRNOP00000067350	10116.ENSRNOP00000023845	0	0	0	0	0.056	0.043	0	0.548	0.555
Rexo4	Znrd1	5051170	5037588	10116.ENSRNOP00000043432	10116.ENSRNOP00000001012	0	0	0	0	0.534	0.085	0	0	0.555
mrpl11	Rps27	5046924	5045301	10116.ENSRNOP00000027091	10116.ENSRNOP00000022897	0	0	0	0	0.322	0.321	0	0.11	0.554
RGD1566137	Polr1c	5050967	5046389	10116.ENSRNOP00000042681	10116.ENSRNOP00000025787	0.09	0	0	0	0.456	0	0	0.172	0.554
Slc12a5	Gabra1	5056075	5038829	10116.ENSRNOP00000062103	10116.ENSRNOP00000004725	0	0	0	0	0.244	0.061	0	0.422	0.554
Srek1	Thrap3	5052648	5041914	10116.ENSRNOP00000049050	10116.ENSRNOP00000013570	0	0	0	0	0.09	0.423	0	0.22	0.554
[truncated: 1,245 more rows]

## Sheet: Pink
#node1	node2	node1_string_internal_id	node2_string_internal_id	node1_external_id	node2_external_id	neighborhood_on_chromosome	gene_fusion	phylogenetic_cooccurrence	homology	coexpression	experimentally_determined_interaction	database_annotated	automated_textmining	combined_score
Rps8	Rpl35	5046394	5043925	10116.ENSRNOP00000025796	10116.ENSRNOP00000019162	0	0	0	0	0.872	0.589	0.9	0.597	0.997
Gucy1b3	Gucy1a3	5056283	5043223	10116.ENSRNOP00000062785	10116.ENSRNOP00000017190	0	0	0.378	0.798	0.684	0.917	0.9	0.897	0.997
Tacr2	Tac1	5059338	5040575	10116.ENSRNOP00000067266	10116.ENSRNOP00000009888	0	0	0	0	0.063	0.512	0.9	0.846	0.992
Sf3a3	Phf5a	5040766	5039219	10116.ENSRNOP00000010373	10116.ENSRNOP00000005837	0	0	0	0	0.178	0.614	0.9	0.728	0.99
Ass1	Asns	5041377	5040656	10116.ENSRNOP00000012075	10116.ENSRNOP00000010079	0.044	0	0	0	0.563	0.163	0.9	0.448	0.977
Drd2	Penk	5051256	5041317	10116.ENSRNOP00000043759	10116.ENSRNOP00000011892	0	0	0	0	0.124	0.09	0.9	0.682	0.971
Chst10	B3gat1	5043416	5040557	10116.ENSRNOP00000017714	10116.ENSRNOP00000009825	0	0	0	0	0.132	0	0.9	0.66	0.967
Epn2	Eps15l1	5050071	5043852	10116.ENSRNOP00000039386	10116.ENSRNOP00000018960	0	0	0	0	0.093	0.452	0.9	0.408	0.966
Rbm22	Phf5a	5046506	5039219	10116.ENSRNOP00000026087	10116.ENSRNOP00000005837	0	0	0	0	0.063	0.612	0.9	0.155	0.965
Kcnab1	Kcnc2	5053195	5039196	10116.ENSRNOP00000051084	10116.ENSRNOP00000005773	0	0	0	0	0.064	0.157	0.9	0.551	0.959
Gng7	Gnb3	5046841	5044743	10116.ENSRNOP00000026893	10116.ENSRNOP00000021480	0	0	0	0	0.063	0.916	0	0.508	0.957
Kcnab1	Kcnc3	5053195	5046913	10116.ENSRNOP00000051084	10116.ENSRNOP00000027062	0	0	0	0	0.063	0.157	0.9	0.528	0.957
Rbx1	Wsb1	5046467	5043503	10116.ENSRNOP00000025979	10116.ENSRNOP00000017949	0	0	0	0	0.062	0	0.9	0.533	0.952
Kcnq3	Kcnab1	5057823	5053195	10116.ENSRNOP00000065354	10116.ENSRNOP00000051084	0	0	0	0	0.063	0.157	0.9	0.428	0.948
Pcyt1b	Chkb	5043031	5042542	10116.ENSRNOP00000016669	10116.ENSRNOP00000015374	0.052	0	0	0	0.086	0	0.9	0.415	0.942
Rbm22	Sf3a3	5046506	5040766	10116.ENSRNOP00000026087	10116.ENSRNOP00000010373	0	0	0	0	0.119	0	0.9	0.316	0.934
Grin2a	Nefl	5050844	5043732	10116.ENSRNOP00000042235	10116.ENSRNOP00000018599	0	0	0	0	0.217	0.1	0.9	0.177	0.934
Rbx1	Fbxo2	5046467	5041600	10116.ENSRNOP00000025979	10116.ENSRNOP00000012670	0	0	0	0	0	0.173	0.9	0.195	0.927
Fbxo17	Fbxo2	5046887	5041600	10116.ENSRNOP00000027006	10116.ENSRNOP00000012670	0	0	0	0.873	0.063	0.202	0.9	0.813	0.927
Drd2	Gnb3	5051256	5044743	10116.ENSRNOP00000043759	10116.ENSRNOP00000021480	0	0	0	0	0.063	0.202	0.9	0.104	0.924
B3gat1	B4galt3	5040557	5038831	10116.ENSRNOP00000009825	10116.ENSRNOP00000004735	0	0	0	0	0.049	0	0.9	0.259	0.923
Sf3a3	Srsf6	5040766	5040080	10116.ENSRNOP00000010373	10116.ENSRNOP00000008427	0	0	0	0	0.176	0.081	0.9	0.108	0.923
Rps8	Ddx47	5046394	5041039	10116.ENSRNOP00000025796	10116.ENSRNOP00000011096	0	0	0	0	0.083	0.187	0.9	0.056	0.92
Gnb3	Htr1d	5044743	5042786	10116.ENSRNOP00000021480	10116.ENSRNOP00000016047	0	0	0	0	0	0.202	0.9	0.073	0.919
Eps15l1	Sh3kbp1	5043852	5039538	10116.ENSRNOP00000018960	10116.ENSRNOP00000006741	0	0	0	0	0	0	0.9	0.229	0.919
Drd2	Htr1d	5051256	5042786	10116.ENSRNOP00000043759	10116.ENSRNOP00000016047	0	0	0	0.823	0.164	0	0.9	0.465	0.919
Epas1	Rbx1	5048794	5046467	10116.ENSRNOP00000033874	10116.ENSRNOP00000025979	0	0	0	0	0	0.126	0.9	0.15	0.919
Fbxo17	Rbx1	5046887	5046467	10116.ENSRNOP00000027006	10116.ENSRNOP00000025979	0	0	0	0	0	0.173	0.9	0.092	0.918
Rab13	Rab4b	5045191	5037971	10116.ENSRNOP00000022626	10116.ENSRNOP00000002052	0	0	0.44	0.91	0.063	0.114	0.9	0.51	0.916
Dhx8	Rbm22	5051064	5046506	10116.ENSRNOP00000043050	10116.ENSRNOP00000026087	0	0	0	0	0.064	0.829	0	0.519	0.916
Gpc1	B3gat1	5058794	5040557	10116.ENSRNOP00000066597	10116.ENSRNOP00000009825	0	0	0	0	0.063	0	0.9	0.172	0.915
Cdh13	Cdh7	5060004	5052753	10116.ENSRNOP00000068368	10116.ENSRNOP00000049491	0	0	0	0.718	0.102	0	0.9	0.344	0.914
Epas1	Psmd1	5048794	5045845	10116.ENSRNOP00000033874	10116.ENSRNOP00000024306	0	0	0	0	0	0.057	0.9	0.161	0.913
Rab40c	Rab4b	5047004	5037971	10116.ENSRNOP00000027266	10116.ENSRNOP00000002052	0	0	0	0.823	0.063	0.114	0.9	0.212	0.912
Htr1d	Penk	5042786	5041317	10116.ENSRNOP00000016047	10116.ENSRNOP00000011892	0	0	0	0	0.076	0.09	0.9	0.067	0.911
Adcy8	Adcy3	5039559	5039071	10116.ENSRNOP00000006789	10116.ENSRNOP00000005389	0	0	0	0.856	0	0	0.9	0.729	0.91
Rbx1	Ercc3	5046467	5043654	10116.ENSRNOP00000025979	10116.ENSRNOP00000018422	0	0	0	0	0.064	0	0.9	0.109	0.909
Epb41l3	Nlgn3	5045281	5038959	10116.ENSRNOP00000022849	10116.ENSRNOP00000005077	0	0	0	0	0.084	0	0.9	0.094	0.909
Cep70	Tuba1a	5053810	5039390	10116.ENSRNOP00000053430	10116.ENSRNOP00000006322	0	0	0	0	0	0.133	0.9	0	0.909
Srsf6	Phf5a	5040080	5039219	10116.ENSRNOP00000008427	10116.ENSRNOP00000005837	0	0	0	0	0.086	0	0.9	0.075	0.908
Rbx1	Psmd1	5046467	5045845	10116.ENSRNOP00000025979	10116.ENSRNOP00000024306	0	0	0	0	0.063	0	0.9	0.093	0.907
Pqbp1	Phf5a	5040824	5039219	10116.ENSRNOP00000010536	10116.ENSRNOP00000005837	0	0	0	0	0.104	0	0.9	0	0.906
Pqbp1	Sf3a3	5040824	5040766	10116.ENSRNOP00000010536	10116.ENSRNOP00000010373	0	0	0	0	0.102	0	0.9	0	0.906
Epn2	Sh3kbp1	5050071	5039538	10116.ENSRNOP00000039386	10116.ENSRNOP00000006741	0	0	0	0	0.063	0	0.9	0.085	0.906
Dgat1	Hmox2	5049071	5038937	10116.ENSRNOP00000035110	10116.ENSRNOP00000005031	0	0	0	0	0.05	0	0.9	0.09	0.906
Gnb3	Penk	5044743	5041317	10116.ENSRNOP00000021480	10116.ENSRNOP00000011892	0	0	0	0	0.08	0	0.9	0	0.904
Tacr2	Gnb3	5059338	5044743	10116.ENSRNOP00000067266	10116.ENSRNOP00000021480	0	0	0	0	0	0.086	0.9	0	0.904
Rab40c	Rab13	5047004	5045191	10116.ENSRNOP00000027266	10116.ENSRNOP00000022626	0	0	0.243	0.897	0	0	0.9	0.304	0.904
Pqbp1	Srsf6	5040824	5040080	10116.ENSRNOP00000010536	10116.ENSRNOP00000008427	0	0	0	0	0.063	0	0.9	0.065	0.904
Gnb3	Tac1	5044743	5040575	10116.ENSRNOP00000021480	10116.ENSRNOP00000009888	0	0	0	0	0.063	0	0.9	0.051	0.903
Rbm22	Srsf6	5046506	5040080	10116.ENSRNOP00000026087	10116.ENSRNOP00000008427	0	0	0	0	0.066	0	0.9	0	0.902
Rbm22	Pqbp1	5046506	5040824	10116.ENSRNOP00000026087	10116.ENSRNOP00000010536	0	0	0	0	0.063	0	0.9	0	0.902
Rbx1	Rnf25	5046467	5045210	10116.ENSRNOP00000025979	10116.ENSRNOP00000022677	0	0	0	0	0.063	0	0.9	0	0.902
Wsb1	Fbxo2	5043503	5041600	10116.ENSRNOP00000017949	10116.ENSRNOP00000012670	0	0	0	0	0	0	0.9	0	0.9
Slco4c1	Hmox2	5049511	5038937	10116.ENSRNOP00000037089	10116.ENSRNOP00000005031	0	0	0	0	0	0	0.9	0	0.9
Fbxo17	Wsb1	5046887	5043503	10116.ENSRNOP00000027006	10116.ENSRNOP00000017949	0	0	0	0	0	0	0.9	0	0.9
Fbxo17	Rnf25	5046887	5045210	10116.ENSRNOP00000027006	10116.ENSRNOP00000022677	0	0	0	0	0	0	0.9	0	0.9
Atad3a	Rab4b	5052072	5037971	10116.ENSRNOP00000046842	10116.ENSRNOP00000002052	0	0	0	0	0	0	0.9	0	0.9
Rnf25	Fbxo2	5045210	5041600	10116.ENSRNOP00000022677	10116.ENSRNOP00000012670	0	0	0	0	0	0	0.9	0	0.9
Rnf25	Wsb1	5045210	5043503	10116.ENSRNOP00000022677	10116.ENSRNOP00000017949	0	0	0	0	0	0	0.9	0	0.9
Rbx1	Prl4a1	5046467	5044968	10116.ENSRNOP00000025979	10116.ENSRNOP00000022027	0	0	0	0	0	0	0.9	0	0.9
Slco4c1	Dgat1	5049511	5049071	10116.ENSRNOP00000037089	10116.ENSRNOP00000035110	0	0	0	0	0.05	0	0.9	0	0.9
Mpnd	Psmd1	5056817	5045845	10116.ENSRNOP00000064107	10116.ENSRNOP00000024306	0	0	0	0	0.537	0.626	0	0.399	0.886
Plekhg5	Mpdz	5055315	5053275	10116.ENSRNOP00000059729	10116.ENSRNOP00000051321	0	0	0	0	0.063	0.787	0	0.433	0.877
Chst12	Chst7	5056670	5039150	10116.ENSRNOP00000063932	10116.ENSRNOP00000005630	0	0	0	0	0.063	0	0	0.851	0.855
Atf4	Asns	5055512	5040656	10116.ENSRNOP00000060302	10116.ENSRNOP00000010079	0	0	0	0	0.104	0	0	0.817	0.829
Hgs	Eps15l1	5053445	5043852	10116.ENSRNOP00000051849	10116.ENSRNOP00000018960	0	0	0	0	0.553	0.422	0	0.389	0.828
Aspdh	Ass1	5056615	5041377	10116.ENSRNOP00000063826	10116.ENSRNOP00000012075	0	0	0	0	0.154	0	0.8	0	0.823
Gng7	Adcy3	5046841	5039071	10116.ENSRNOP00000026893	10116.ENSRNOP00000005389	0	0	0	0	0.071	0	0.8	0.102	0.818
Pcyt1b	Mapk9	5043031	5038586	10116.ENSRNOP00000016669	10116.ENSRNOP00000003987	0	0	0	0	0.063	0	0.8	0.081	0.812
Slc8a2	Slc8a1	5050783	5050442	10116.ENSRNOP00000042012	10116.ENSRNOP00000040751	0	0	0	0.969	0.063	0	0.8	0.885	0.809
Aspdh	Asns	5056615	5040656	10116.ENSRNOP00000063826	10116.ENSRNOP00000010079	0.042	0	0	0	0	0	0.8	0	0.8
Nrxn3	Nlgn3	5055627	5038959	10116.ENSRNOP00000060655	10116.ENSRNOP00000005077	0	0	0	0	0.063	0.213	0	0.737	0.789
Sdad1	Ddx47	5049172	5041039	10116.ENSRNOP00000035588	10116.ENSRNOP00000011096	0	0	0	0	0.778	0	0	0	0.778
Cir1	Nkap	5055718	5050083	10116.ENSRNOP00000060978	10116.ENSRNOP00000039435	0	0	0	0	0.153	0.485	0	0.52	0.772
Gng7	Olr1730	5046841	5037582	10116.ENSRNOP00000026893	10116.ENSRNOP00000000986	0	0	0	0	0	0	0.6	0.453	0.771
Dgat1	Agpat1	5049071	5037437	10116.ENSRNOP00000035110	10116.ENSRNOP00000000500	0	0	0	0	0.063	0	0	0.759	0.764
Gng7	Htr1d	5046841	5042786	10116.ENSRNOP00000026893	10116.ENSRNOP00000016047	0	0	0	0	0.079	0.177	0.6	0.307	0.761
Drd2	Gng7	5051256	5046841	10116.ENSRNOP00000043759	10116.ENSRNOP00000026893	0	0	0	0	0.151	0.177	0.6	0.23	0.756
Chst15	Chst7	5045013	5039150	10116.ENSRNOP00000022157	10116.ENSRNOP00000005630	0	0	0	0	0	0	0	0.754	0.754
Ptpn23	Hgs	5053692	5053445	10116.ENSRNOP00000052992	10116.ENSRNOP00000051849	0	0	0	0	0.173	0.422	0	0.516	0.748
Dhx8	Phf5a	5051064	5039219	10116.ENSRNOP00000043050	10116.ENSRNOP00000005837	0	0	0	0	0.149	0.412	0	0.528	0.743
Slc8a2	Slc24a2	5050783	5040938	10116.ENSRNOP00000042012	10116.ENSRNOP00000010827	0	0	0	0	0.199	0	0	0.69	0.741
Ufd1l	Rbx1	5059183	5046467	10116.ENSRNOP00000067081	10116.ENSRNOP00000025979	0	0	0	0	0.064	0.313	0	0.616	0.731
Pcgf6	Bre	5047070	5039228	10116.ENSRNOP00000027450	10116.ENSRNOP00000005855	0	0	0	0	0	0	0.72	0.048	0.722
Dhx8	Srsf6	5051064	5040080	10116.ENSRNOP00000043050	10116.ENSRNOP00000008427	0	0	0	0	0.122	0.52	0	0.385	0.718
Gphn	Nlgn3	5056810	5038959	10116.ENSRNOP00000064099	10116.ENSRNOP00000005077	0	0	0	0	0.064	0	0	0.707	0.714
Dgat1	Lpl	5049071	5042985	10116.ENSRNOP00000035110	10116.ENSRNOP00000016543	0	0	0	0	0	0	0	0.711	0.711
Nefl	Gap43	5043732	5037985	10116.ENSRNOP00000018599	10116.ENSRNOP00000002091	0	0	0	0	0.316	0	0	0.593	0.71
Atad3a	Gfm1	5052072	5050270	10116.ENSRNOP00000046842	10116.ENSRNOP00000040081	0	0	0	0	0.409	0	0	0.523	0.706
Gphn	Pvalb	5056810	5055033	10116.ENSRNOP00000064099	10116.ENSRNOP00000058825	0	0	0	0	0	0	0	0.698	0.698
Rock1	Add2	5052201	5044747	10116.ENSRNOP00000047378	10116.ENSRNOP00000021491	0	0	0	0	0.063	0.653	0	0.122	0.689
Map3k11	Rab13	5047369	5045191	10116.ENSRNOP00000028185	10116.ENSRNOP00000022626	0	0	0	0	0	0.077	0	0.676	0.688
Ptpn23	Rbm22	5053692	5046506	10116.ENSRNOP00000052992	10116.ENSRNOP00000026087	0	0	0	0	0	0	0	0.688	0.688
Mpnd	Bre	5056817	5039228	10116.ENSRNOP00000064107	10116.ENSRNOP00000005855	0	0	0	0	0.063	0.577	0	0.255	0.678
Grin2a	Adcy8	5050844	5039559	10116.ENSRNOP00000042235	10116.ENSRNOP00000006789	0	0	0	0	0.22	0	0	0.602	0.677
Gpr141	Gpr139	5055928	5049655	10116.ENSRNOP00000061664	10116.ENSRNOP00000037722	0	0	0	0	0	0	0	0.676	0.676
Ric8b	Adcy3	5040487	5039071	10116.ENSRNOP00000009625	10116.ENSRNOP00000005389	0	0	0	0	0.063	0	0	0.669	0.676
Chst12	Mief1	5056670	5045656	10116.ENSRNOP00000063932	10116.ENSRNOP00000023843	0	0	0	0	0	0	0	0.676	0.676
Acp2	Acy1	5043737	5042712	10116.ENSRNOP00000018620	10116.ENSRNOP00000015852	0	0	0	0	0	0	0	0.676	0.676
Atf4	Camk1	5055512	5048702	10116.ENSRNOP00000060302	10116.ENSRNOP00000033456	0	0	0	0	0.063	0.067	0.6	0.178	0.674
Gclc	Hmox2	5049165	5038937	10116.ENSRNOP00000035540	10116.ENSRNOP00000005031	0	0	0	0	0	0.219	0	0.598	0.673
Pvalb	Grin2a	5055033	5050844	10116.ENSRNOP00000058825	10116.ENSRNOP00000042235	0	0	0	0	0.112	0.062	0	0.638	0.672
Stxbp5	Stx3	5052713	5047506	10116.ENSRNOP00000049322	10116.ENSRNOP00000028535	0	0	0	0	0	0.612	0	0.191	0.672
Chst12	Chst15	5056670	5045013	10116.ENSRNOP00000063932	10116.ENSRNOP00000022157	0	0	0	0	0	0	0	0.67	0.67
Mpdz	Trpc5	5053275	5040406	10116.ENSRNOP00000051321	10116.ENSRNOP00000009400	0	0	0	0	0.077	0.589	0	0.191	0.666
Gfm1	Rbm22	5050270	5046506	10116.ENSRNOP00000040081	10116.ENSRNOP00000026087	0	0	0	0	0.063	0.603	0	0.172	0.665
Gnb3	Adcy3	5044743	5039071	10116.ENSRNOP00000021480	10116.ENSRNOP00000005389	0	0	0	0	0.063	0.136	0.6	0.087	0.664
Gnb3	Adcy8	5044743	5039559	10116.ENSRNOP00000021480	10116.ENSRNOP00000006789	0	0	0	0	0.063	0.136	0.6	0.087	0.664
Gfm1	Rpl35	5050270	5043925	10116.ENSRNOP00000040081	10116.ENSRNOP00000019162	0.084	0	0	0	0.362	0.414	0	0.134	0.663
Drd2	Rgs9	5051256	5038958	10116.ENSRNOP00000043759	10116.ENSRNOP00000005076	0	0	0	0	0.196	0.055	0	0.59	0.661
Grk6	Drd2	5052937	5051256	10116.ENSRNOP00000050134	10116.ENSRNOP00000043759	0	0	0	0	0.064	0.189	0	0.586	0.658
Gpr139	Gpr153	5049655	5042211	10116.ENSRNOP00000037722	10116.ENSRNOP00000014444	0	0	0	0	0.058	0	0	0.65	0.656
Penk	Tac1	5041317	5040575	10116.ENSRNOP00000011892	10116.ENSRNOP00000009888	0	0	0	0	0.143	0	0	0.614	0.656
Aqp4	S100b	5056583	5037858	10116.ENSRNOP00000063720	10116.ENSRNOP00000001743	0	0	0	0	0.113	0	0	0.628	0.655
Cant1	Nt5c3b	5055384	5045122	10116.ENSRNOP00000059931	10116.ENSRNOP00000022430	0	0	0	0	0	0	0.65	0	0.65
Gng7	Adcy8	5046841	5039559	10116.ENSRNOP00000026893	10116.ENSRNOP00000006789	0	0	0	0	0.099	0	0.6	0.102	0.648
Grk1	Gnb3	5046105	5044743	10116.ENSRNOP00000024999	10116.ENSRNOP00000021480	0	0	0	0	0	0.321	0	0.502	0.647
Ddx21	Dhx8	5056514	5051064	10116.ENSRNOP00000063494	10116.ENSRNOP00000043050	0	0	0	0	0.201	0.365	0	0.352	0.642
Gucy1b3	Adcy8	5056283	5039559	10116.ENSRNOP00000062785	10116.ENSRNOP00000006789	0	0	0	0.59	0.083	0	0.54	0.474	0.641
Pcsk1	Nkx6-1	5042469	5038244	10116.ENSRNOP00000015185	10116.ENSRNOP00000002928	0	0	0	0	0	0	0	0.64	0.64
Gucy1a3	Adcy8	5043223	5039559	10116.ENSRNOP00000017190	10116.ENSRNOP00000006789	0	0	0	0.572	0.063	0	0.54	0.478	0.638
Dhx8	Ddx47	5051064	5041039	10116.ENSRNOP00000043050	10116.ENSRNOP00000011096	0	0	0	0	0.151	0.365	0	0.383	0.638
Pvalb	Kcnc2	5055033	5039196	10116.ENSRNOP00000058825	10116.ENSRNOP00000005773	0	0	0	0	0.107	0.174	0	0.548	0.637
Pvalb	Nrg1	5055033	5042152	10116.ENSRNOP00000058825	10116.ENSRNOP00000014268	0	0	0	0	0	0	0	0.636	0.636
Sdad1	Nap1l5	5049172	5040730	10116.ENSRNOP00000035588	10116.ENSRNOP00000010263	0	0	0	0	0.15	0.466	0	0.259	0.634
Stxbp5	Exoc8	5052713	5046795	10116.ENSRNOP00000049322	10116.ENSRNOP00000026757	0	0	0	0	0.086	0.395	0	0.385	0.63
Gucy1b3	Adcy3	5056283	5039071	10116.ENSRNOP00000062785	10116.ENSRNOP00000005389	0	0	0	0.581	0.063	0	0.54	0.45	0.63
Camk1	Ppm1e	5048702	5038538	10116.ENSRNOP00000033456	10116.ENSRNOP00000003859	0	0	0	0	0.064	0.462	0	0.32	0.628
Pvalb	S100b	5055033	5037858	10116.ENSRNOP00000058825	10116.ENSRNOP00000001743	0	0	0	0	0.119	0.171	0	0.529	0.626
Aspdh	Acy1	5056615	5042712	10116.ENSRNOP00000063826	10116.ENSRNOP00000015852	0	0	0	0	0.141	0	0	0.582	0.625
Rgs14	Ric8b	5044794	5040487	10116.ENSRNOP00000021596	10116.ENSRNOP00000009625	0	0	0	0	0	0	0	0.622	0.622
Gucy1a3	Adcy3	5043223	5039071	10116.ENSRNOP00000017190	10116.ENSRNOP00000005389	0	0	0	0.586	0.063	0	0.54	0.39	0.618
Drd2	Tac1	5051256	5040575	10116.ENSRNOP00000043759	10116.ENSRNOP00000009888	0	0	0	0	0.28	0	0	0.49	0.618
Gfm1	Phf5a	5050270	5039219	10116.ENSRNOP00000040081	10116.ENSRNOP00000005837	0	0	0	0	0.064	0.603	0	0.054	0.617
Nefl	S100b	5043732	5037858	10116.ENSRNOP00000018599	10116.ENSRNOP00000001743	0	0	0	0	0.221	0.062	0	0.517	0.616
Dyrk1a	Grin2a	5050912	5050844	10116.ENSRNOP00000042446	10116.ENSRNOP00000042235	0	0	0	0	0	0	0	0.612	0.612
Kcnq3	Scn8a	5057823	5040001	10116.ENSRNOP00000065354	10116.ENSRNOP00000008160	0	0	0	0	0.211	0.065	0	0.516	0.612
Gnb3	Mapk9	5044743	5038586	10116.ENSRNOP00000021480	10116.ENSRNOP00000003987	0	0	0	0	0.063	0	0.6	0	0.609
Cacna1h	Rasgrp2	5050846	5047557	10116.ENSRNOP00000042239	10116.ENSRNOP00000028646	0	0	0	0	0.063	0	0.6	0	0.609
Drd2	Grin2a	5051256	5050844	10116.ENSRNOP00000043759	10116.ENSRNOP00000042235	0	0	0	0	0.114	0	0	0.575	0.608
Ddx21	Ddx47	5056514	5041039	10116.ENSRNOP00000063494	10116.ENSRNOP00000011096	0	0	0.439	0.721	0.513	0	0	0.323	0.604
Fabp3	Lpl	5043279	5042985	10116.ENSRNOP00000017325	10116.ENSRNOP00000016543	0	0	0	0	0.08	0	0	0.587	0.604
Gorasp2	Magi3	5049469	5046865	10116.ENSRNOP00000036881	10116.ENSRNOP00000026952	0	0	0	0	0.046	0.087	0	0.58	0.602
Gng7	Mapk9	5046841	5038586	10116.ENSRNOP00000026893	10116.ENSRNOP00000003987	0	0	0	0	0	0	0.6	0.048	0.602
Sdad1	Rps8	5049172	5046394	10116.ENSRNOP00000035588	10116.ENSRNOP00000025796	0	0	0	0	0.306	0.422	0	0.087	0.601
Gng7	Olr1646	5046841	5041660	10116.ENSRNOP00000026893	10116.ENSRNOP00000012866	0	0	0	0	0	0	0.6	0	0.6
Gng7	Olr41	5046841	5042793	10116.ENSRNOP00000026893	10116.ENSRNOP00000016061	0	0	0	0	0	0	0.6	0	0.6
Olr1091	Gng7	5058912	5046841	10116.ENSRNOP00000066743	10116.ENSRNOP00000026893	0	0	0	0	0	0	0.6	0	0.6
Olr297	Gng7	5050525	5046841	10116.ENSRNOP00000041073	10116.ENSRNOP00000026893	0	0	0	0	0	0	0.6	0	0.6
Olr1250	Gng7	5058400	5046841	10116.ENSRNOP00000066099	10116.ENSRNOP00000026893	0	0	0	0	0	0	0.6	0	0.6
Gng7	Olr1072	5046841	5041061	10116.ENSRNOP00000026893	10116.ENSRNOP00000011176	0	0	0	0	0	0	0.6	0	0.6
Itih3	Tm4sf4	5045707	5044994	10116.ENSRNOP00000023984	10116.ENSRNOP00000022105	0	0	0	0	0.593	0	0	0	0.593
Drd2	Sh3kbp1	5051256	5039538	10116.ENSRNOP00000043759	10116.ENSRNOP00000006741	0	0	0	0	0	0.5	0	0.21	0.588
Nr1i3	Chst10	5052590	5043416	10116.ENSRNOP00000048836	10116.ENSRNOP00000017714	0	0	0	0	0	0	0	0.585	0.585
Rps8	Psmd1	5046394	5045845	10116.ENSRNOP00000025796	10116.ENSRNOP00000024306	0	0	0	0	0.441	0.056	0	0.267	0.579
Ptpn23	Capn7	5053692	5046609	10116.ENSRNOP00000052992	10116.ENSRNOP00000026323	0	0	0	0	0.05	0.141	0	0.52	0.574
Fam203a	Sdad1	5052248	5049172	10116.ENSRNOP00000047549	10116.ENSRNOP00000035588	0	0	0	0	0.572	0	0	0	0.572
Dhx8	Sf3a3	5051064	5040766	10116.ENSRNOP00000043050	10116.ENSRNOP00000010373	0	0	0	0	0.147	0.218	0	0.409	0.571
Gphn	Ubqln1	5056810	5054843	10116.ENSRNOP00000064099	10116.ENSRNOP00000057944	0	0	0	0	0.049	0.069	0	0.553	0.57
Rps8	Gar1	5046394	5041757	10116.ENSRNOP00000025796	10116.ENSRNOP00000013149	0.094	0	0	0	0.53	0.069	0	0	0.568
Sdad1	Gar1	5049172	5041757	10116.ENSRNOP00000035588	10116.ENSRNOP00000013149	0	0	0	0	0.567	0	0	0	0.567
Pex5l	Adhfe1	5042478	5040430	10116.ENSRNOP00000015200	10116.ENSRNOP00000009462	0	0	0	0	0.479	0	0	0.201	0.566
Ufd1l	Atad1	5059183	5042290	10116.ENSRNOP00000067081	10116.ENSRNOP00000014684	0	0	0	0	0.147	0.432	0	0.172	0.563
Tbcb	Tuba1a	5047379	5039390	10116.ENSRNOP00000028211	10116.ENSRNOP00000006322	0	0	0	0	0.064	0.298	0	0.384	0.56
Guca2a	Adcy8	5041308	5039559	10116.ENSRNOP00000011867	10116.ENSRNOP00000006789	0	0	0	0	0	0.068	0	0.544	0.556
Ufd1l	Ubqln1	5059183	5054843	10116.ENSRNOP00000067081	10116.ENSRNOP00000057944	0	0	0	0	0.112	0.197	0	0.427	0.556
Ufd1l	Chfr	5059183	5053824	10116.ENSRNOP00000067081	10116.ENSRNOP00000053478	0	0	0	0	0.064	0.315	0	0.364	0.556
Grk1	Rgs9	5046105	5038958	10116.ENSRNOP00000024999	10116.ENSRNOP00000005076	0	0	0	0	0.062	0	0	0.545	0.555
Guca2a	Adcy3	5041308	5039071	10116.ENSRNOP00000011867	10116.ENSRNOP00000005389	0	0	0	0	0	0.068	0	0.543	0.555
Ddx21	Sdad1	5056514	5049172	10116.ENSRNOP00000063494	10116.ENSRNOP00000035588	0	0	0	0	0.553	0	0	0	0.553
Ptpn23	Sh3kbp1	5053692	5039538	10116.ENSRNOP00000052992	10116.ENSRNOP00000006741	0	0	0	0	0	0.149	0	0.497	0.553
ZH14	Tuba1a	5058980	5039390	10116.ENSRNOP00000066828	10116.ENSRNOP00000006322	0	0	0	0	0.064	0.298	0	0.372	0.551
Pvalb	Nlgn3	5055033	5038959	10116.ENSRNOP00000058825	10116.ENSRNOP00000005077	0	0	0	0	0.064	0	0	0.537	0.548
Grin2a	Nlgn3	5050844	5038959	10116.ENSRNOP00000042235	10116.ENSRNOP00000005077	0	0	0	0	0.18	0	0	0.47	0.547
Mcart1	Slc25a18	5057561	5042605	10116.ENSRNOP00000065025	10116.ENSRNOP00000015561	0	0	0	0	0	0	0	0.545	0.545
Gphn	Grin2a	5056810	5050844	10116.ENSRNOP00000064099	10116.ENSRNOP00000042235	0	0	0	0	0	0	0	0.545	0.545
Dhx8	Sdad1	5051064	5049172	10116.ENSRNOP00000043050	10116.ENSRNOP00000035588	0	0	0	0	0.533	0	0	0	0.533
Aqp4	Dpp6	5056583	5051083	10116.ENSRNOP00000063720	10116.ENSRNOP00000043113	0	0	0	0	0.109	0	0	0.496	0.532
Pvalb	Drd2	5055033	5051256	10116.ENSRNOP00000058825	10116.ENSRNOP00000043759	0	0	0	0	0.063	0	0	0.521	0.532
Dgat1	Fabp3	5049071	5043279	10116.ENSRNOP00000035110	10116.ENSRNOP00000017325	0	0	0	0	0	0	0	0.528	0.528
Rasgrp2	Rnd2	5047557	5047328	10116.ENSRNOP00000028646	10116.ENSRNOP00000028089	0	0	0	0	0	0.198	0	0.434	0.527
Fam203a	Ddx47	5052248	5041039	10116.ENSRNOP00000047549	10116.ENSRNOP00000011096	0	0	0	0	0.526	0	0	0	0.526
Gpr153	Olr1730	5042211	5037582	10116.ENSRNOP00000014444	10116.ENSRNOP00000000986	0	0	0	0	0	0	0	0.525	0.525
Gfm1	Stx3	5050270	5047506	10116.ENSRNOP00000040081	10116.ENSRNOP00000028535	0	0	0	0	0.063	0	0	0.511	0.522
Gfm1	Rps8	5050270	5046394	10116.ENSRNOP00000040081	10116.ENSRNOP00000025796	0	0	0	0	0.185	0.397	0	0.104	0.521
Stx3	Sytl5	5047506	5038846	10116.ENSRNOP00000028535	10116.ENSRNOP00000004785	0	0	0	0	0	0.366	0	0.271	0.518
B3gat1	Chst7	5040557	5039150	10116.ENSRNOP00000009825	10116.ENSRNOP00000005630	0	0	0	0	0	0	0	0.518	0.518
Rin1	Sh3kbp1	5058377	5039538	10116.ENSRNOP00000066064	10116.ENSRNOP00000006741	0	0	0	0	0	0.453	0	0.153	0.517
Gfm1	Ndufs1	5050270	5042711	10116.ENSRNOP00000040081	10116.ENSRNOP00000015851	0.053	0	0	0	0.295	0	0	0.332	0.515
Rab13	Sytl5	5045191	5038846	10116.ENSRNOP00000022626	10116.ENSRNOP00000004785	0	0	0	0	0	0.069	0	0.498	0.512
Rab13	Tbc1d20	5045191	5040159	10116.ENSRNOP00000022626	10116.ENSRNOP00000008713	0	0	0	0	0.063	0.204	0	0.397	0.511
Ufd1l	Dgcr14	5059183	5037387	10116.ENSRNOP00000067081	10116.ENSRNOP00000000308	0	0	0	0	0	0	0	0.511	0.511
Fam203a	Asns	5052248	5040656	10116.ENSRNOP00000047549	10116.ENSRNOP00000010079	0	0	0	0	0	0.51	0	0	0.51
Pvalb	Tnnc2	5055033	5044323	10116.ENSRNOP00000058825	10116.ENSRNOP00000020348	0	0	0	0	0.39	0	0	0.226	0.507
Tmub2	Sf3a3	5053493	5040766	10116.ENSRNOP00000052057	10116.ENSRNOP00000010373	0	0	0	0	0	0	0	0.507	0.507
Acp2	Ttc1	5043737	5039036	10116.ENSRNOP00000018620	10116.ENSRNOP00000005304	0	0	0	0	0	0	0	0.506	0.506
Epas1	Flcn	5048794	5038743	10116.ENSRNOP00000033874	10116.ENSRNOP00000004412	0	0	0	0	0	0.5	0	0.048	0.503
Epn2	Tuba1a	5050071	5039390	10116.ENSRNOP00000039386	10116.ENSRNOP00000006322	0	0	0	0	0	0.502	0	0	0.502
Acy1	Ddx47	5042712	5041039	10116.ENSRNOP00000015852	10116.ENSRNOP00000011096	0	0	0	0	0.063	0	0	0.489	0.501
Gnb3	Rgs9	5044743	5038958	10116.ENSRNOP00000021480	10116.ENSRNOP00000005076	0	0	0	0	0.063	0.313	0	0.286	0.5
Rock1	Rnd2	5052201	5047328	10116.ENSRNOP00000047378	10116.ENSRNOP00000028089	0	0	0	0	0	0.184	0	0.411	0.498
B3gat1	Nell2	5040557	5040258	10116.ENSRNOP00000009825	10116.ENSRNOP00000008985	0	0	0	0	0.221	0	0	0.379	0.496
Kcnq3	Pvalb	5057823	5055033	10116.ENSRNOP00000065354	10116.ENSRNOP00000058825	0	0	0	0	0.063	0.395	0	0.183	0.496
Chst15	Chst10	5045013	5043416	10116.ENSRNOP00000022157	10116.ENSRNOP00000017714	0	0	0	0	0	0	0	0.494	0.494
Rnd2	Myo9a	5047328	5042754	10116.ENSRNOP00000028089	10116.ENSRNOP00000015963	0	0	0	0	0.05	0.429	0	0.137	0.49
Grk1	Rab13	5046105	5045191	10116.ENSRNOP00000024999	10116.ENSRNOP00000022626	0	0	0	0	0.05	0	0	0.483	0.488
Psmd1	Oas1b	5045845	5037898	10116.ENSRNOP00000024306	10116.ENSRNOP00000001853	0	0	0	0	0.064	0.454	0	0.078	0.487
Psmd1	Oas1f	5045845	5037895	10116.ENSRNOP00000024306	10116.ENSRNOP00000001848	0	0	0	0	0.064	0.454	0	0.078	0.487
Oas1k	Psmd1	5053955	5045845	10116.ENSRNOP00000054081	10116.ENSRNOP00000024306	0	0	0	0	0.064	0.454	0	0.078	0.487
Isyna1	Ercc3	5046816	5043654	10116.ENSRNOP00000026821	10116.ENSRNOP00000018422	0	0	0	0	0	0.485	0	0	0.485
Ddx21	Rps8	5056514	5046394	10116.ENSRNOP00000063494	10116.ENSRNOP00000025796	0	0	0	0	0.137	0.187	0	0.324	0.484
Gar1	Ddx47	5041757	5041039	10116.ENSRNOP00000013149	10116.ENSRNOP00000011096	0.042	0	0	0	0.351	0.178	0	0.11	0.484
Ddx21	Gar1	5056514	5041757	10116.ENSRNOP00000063494	10116.ENSRNOP00000013149	0.042	0	0	0	0.304	0.288	0	0	0.483
Ncdn	Fbxo2	5042860	5041600	10116.ENSRNOP00000016229	10116.ENSRNOP00000012670	0	0	0	0	0.161	0	0	0.408	0.482
ENSRNOG00000013082	Thop1	5054517	5046902	10116.ENSRNOP00000056519	10116.ENSRNOP00000027045	0.043	0	0	0	0.076	0	0	0.459	0.48
Ubqln1	Psmd1	5054843	5045845	10116.ENSRNOP00000057944	10116.ENSRNOP00000024306	0	0	0	0	0.064	0.414	0	0.129	0.48
Cep70	B4galt3	5053810	5038831	10116.ENSRNOP00000053430	10116.ENSRNOP00000004735	0	0	0	0	0	0	0	0.48	0.48
Grin2a	Olfm3	5050844	5045821	10116.ENSRNOP00000042235	10116.ENSRNOP00000024243	0	0	0	0	0.219	0	0.36	0	0.479
Crybb1	Rbm22	5057324	5046506	10116.ENSRNOP00000064741	10116.ENSRNOP00000026087	0	0	0	0	0	0	0	0.478	0.478
Thop1	Lnpep	5046902	5043417	10116.ENSRNOP00000027045	10116.ENSRNOP00000017718	0.043	0	0	0	0.076	0	0	0.456	0.477
Gap43	S100b	5037985	5037858	10116.ENSRNOP00000002091	10116.ENSRNOP00000001743	0	0	0	0	0.176	0	0	0.391	0.477
Gnmt	Hpd	5045068	5037880	10116.ENSRNOP00000022307	10116.ENSRNOP00000001809	0	0	0	0	0.278	0	0	0.306	0.477
Grina	Rapgef5	5054479	5039665	10116.ENSRNOP00000056356	10116.ENSRNOP00000007112	0	0	0	0	0.049	0	0	0.472	0.476
Hgs	Oas1f	5053445	5037895	10116.ENSRNOP00000051849	10116.ENSRNOP00000001848	0	0	0	0	0.063	0.42	0	0.113	0.475
Oas1k	Hgs	5053955	5053445	10116.ENSRNOP00000054081	10116.ENSRNOP00000051849	0	0	0	0	0.063	0.42	0	0.113	0.475
Hgs	Oas1b	5053445	5037898	10116.ENSRNOP00000051849	10116.ENSRNOP00000001853	0	0	0	0	0.063	0.42	0	0.113	0.475
Fubp1	Sf3a3	5055892	5040766	10116.ENSRNOP00000061544	10116.ENSRNOP00000010373	0	0	0	0	0.466	0	0	0.057	0.475
Pvalb	Gap43	5055033	5037985	10116.ENSRNOP00000058825	10116.ENSRNOP00000002091	0	0	0	0	0.125	0.148	0	0.351	0.473
Oas1k	Rps8	5053955	5046394	10116.ENSRNOP00000054081	10116.ENSRNOP00000025796	0	0	0	0	0.138	0.407	0	0.049	0.471
Hyal5	Pla2g2d	5054680	5045175	10116.ENSRNOP00000057222	10116.ENSRNOP00000022579	0	0	0	0	0	0	0	0.471	0.471
Rps8	Oas1b	5046394	5037898	10116.ENSRNOP00000025796	10116.ENSRNOP00000001853	0	0	0	0	0.138	0.407	0	0.049	0.471
Rps8	Oas1f	5046394	5037895	10116.ENSRNOP00000025796	10116.ENSRNOP00000001848	0	0	0	0	0.138	0.407	0	0.049	0.471
Mpnd	Oas1b	5056817	5037898	10116.ENSRNOP00000064107	10116.ENSRNOP00000001853	0	0	0	0	0.064	0.417	0	0.105	0.468
Mpnd	Oas1k	5056817	5053955	10116.ENSRNOP00000064107	10116.ENSRNOP00000054081	0	0	0	0	0.064	0.417	0	0.105	0.468
Mpnd	Oas1f	5056817	5037895	10116.ENSRNOP00000064107	10116.ENSRNOP00000001848	0	0	0	0	0.064	0.417	0	0.105	0.468
Sqstm1	Psmd1	5054398	5045845	10116.ENSRNOP00000056021	10116.ENSRNOP00000024306	0	0	0	0	0.08	0.396	0	0.116	0.466
Fam203a	Atad3a	5052248	5052072	10116.ENSRNOP00000047549	10116.ENSRNOP00000046842	0	0	0	0	0.463	0	0	0	0.463
Dyrk1a	Srsf6	5050912	5040080	10116.ENSRNOP00000042446	10116.ENSRNOP00000008427	0	0	0	0	0.064	0.212	0	0.329	0.462
Exoc8	Rab13	5046795	5045191	10116.ENSRNOP00000026757	10116.ENSRNOP00000022626	0	0	0	0	0.063	0.134	0	0.39	0.462
Grk6	Gnb3	5052937	5044743	10116.ENSRNOP00000050134	10116.ENSRNOP00000021480	0	0	0	0	0	0.453	0	0.057	0.462
Atf4	Hmox2	5055512	5038937	10116.ENSRNOP00000060302	10116.ENSRNOP00000005031	0	0	0	0	0	0	0	0.461	0.461
Scn8a	Kcnc2	5040001	5039196	10116.ENSRNOP00000008160	10116.ENSRNOP00000005773	0	0	0	0	0.205	0.065	0	0.333	0.461
Ubqln1	Fbxo2	5054843	5041600	10116.ENSRNOP00000057944	10116.ENSRNOP00000012670	0	0	0	0	0	0	0	0.46	0.46
Gucy1a3	Gap43	5043223	5037985	10116.ENSRNOP00000017190	10116.ENSRNOP00000002091	0	0	0	0	0.064	0	0	0.447	0.46
Grin2a	Slc30a3	5050844	5039987	10116.ENSRNOP00000042235	10116.ENSRNOP00000008126	0	0	0	0	0.095	0	0	0.423	0.456
Tmub2	Ercc3	5053493	5043654	10116.ENSRNOP00000052057	10116.ENSRNOP00000018422	0	0	0	0	0	0	0	0.454	0.454
Hgs	Epn2	5053445	5050071	10116.ENSRNOP00000051849	10116.ENSRNOP00000039386	0	0	0	0	0.064	0.148	0	0.368	0.451
Tm4sf4	Gkn1	5044994	5041428	10116.ENSRNOP00000022105	10116.ENSRNOP00000012218	0	0	0	0	0	0	0	0.451	0.451
Rock1	Thoc1	5052201	5050962	10116.ENSRNOP00000047378	10116.ENSRNOP00000042658	0	0	0	0	0.064	0	0	0.436	0.45
ENSRNOG00000013082	Slco4c1	5054517	5049511	10116.ENSRNOP00000056519	10116.ENSRNOP00000037089	0	0	0	0	0	0	0	0.45	0.45
Lrrc4	Dscam	5040882	5038024	10116.ENSRNOP00000010673	10116.ENSRNOP00000002215	0	0	0	0	0.167	0.043	0	0.364	0.449
Pvalb	Scn8a	5055033	5040001	10116.ENSRNOP00000058825	10116.ENSRNOP00000008160	0	0	0	0	0.064	0.236	0	0.292	0.449
Dpp6	Kcnc3	5051083	5046913	10116.ENSRNOP00000043113	10116.ENSRNOP00000027062	0	0	0	0	0.156	0.05	0	0.366	0.448
Stxbp5	Nrg1	5052713	5042152	10116.ENSRNOP00000049322	10116.ENSRNOP00000014268	0	0	0	0	0	0.447	0	0.044	0.448
B3gat1	Sh3kbp1	5040557	5039538	10116.ENSRNOP00000009825	10116.ENSRNOP00000006741	0	0	0	0	0	0	0	0.446	0.446
Gng7	Rgs9	5046841	5038958	10116.ENSRNOP00000026893	10116.ENSRNOP00000005076	0	0	0	0	0.151	0	0	0.373	0.445
Slc7a3	Adcy3	5059956	5039071	10116.ENSRNOP00000068222	10116.ENSRNOP00000005389	0	0	0	0	0	0	0	0.445	0.445
Rbm22	Ddx47	5046506	5041039	10116.ENSRNOP00000026087	10116.ENSRNOP00000011096	0	0	0	0	0.064	0.397	0	0.094	0.443
Slco4c1	Lnpep	5049511	5043417	10116.ENSRNOP00000037089	10116.ENSRNOP00000017718	0	0	0	0	0	0	0	0.442	0.442
Olr1250	Add2	5058400	5044747	10116.ENSRNOP00000066099	10116.ENSRNOP00000021491	0	0	0	0	0	0	0	0.442	0.442
Sh2b3	Naa25	5058998	5052681	10116.ENSRNOP00000066850	10116.ENSRNOP00000049175	0	0	0	0	0	0	0	0.441	0.441
Nap1l5	Phyhipl	5040730	5037383	10116.ENSRNOP00000010263	10116.ENSRNOP00000000299	0	0	0	0	0.119	0	0	0.39	0.44
Grin2a	Nrg1	5050844	5042152	10116.ENSRNOP00000042235	10116.ENSRNOP00000014268	0	0	0	0	0	0	0	0.439	0.439
Kcnt2	Kcnc2	5043478	5039196	10116.ENSRNOP00000017884	10116.ENSRNOP00000005773	0	0	0	0	0.126	0	0	0.383	0.437
Gpr139	Adcy3	5049655	5039071	10116.ENSRNOP00000037722	10116.ENSRNOP00000005389	0	0	0	0	0.064	0.061	0	0.41	0.436
Pvalb	Kcnc3	5055033	5046913	10116.ENSRNOP00000058825	10116.ENSRNOP00000027062	0	0	0	0	0.064	0.174	0	0.33	0.436
Ubqln1	Ttc1	5054843	5039036	10116.ENSRNOP00000057944	10116.ENSRNOP00000005304	0	0	0	0	0.064	0.305	0	0.202	0.436
Atf4	Mapk9	5055512	5038586	10116.ENSRNOP00000060302	10116.ENSRNOP00000003987	0	0	0	0	0	0	0	0.436	0.436
Aqp4	Pvalb	5056583	5055033	10116.ENSRNOP00000063720	10116.ENSRNOP00000058825	0	0	0	0	0.152	0.198	0	0.237	0.436
Hsp90ab1	Tuba1a	5046851	5039390	10116.ENSRNOP00000026920	10116.ENSRNOP00000006322	0	0	0	0	0.063	0.069	0	0.406	0.436
Sdad1	Rpl35	5049172	5043925	10116.ENSRNOP00000035588	10116.ENSRNOP00000019162	0	0	0	0	0.077	0.397	0	0.068	0.435
Mpdz	Magi3	5053275	5046865	10116.ENSRNOP00000051321	10116.ENSRNOP00000026952	0	0	0	0.544	0.063	0.198	0	0.625	0.434
Olfm3	Nap1l5	5045821	5040730	10116.ENSRNOP00000024243	10116.ENSRNOP00000010263	0	0	0	0	0.214	0	0	0.308	0.433
Ubqln1	Rbx1	5054843	5046467	10116.ENSRNOP00000057944	10116.ENSRNOP00000025979	0	0	0	0	0.064	0.303	0	0.2	0.432
Dhx8	Gfm1	5051064	5050270	10116.ENSRNOP00000043050	10116.ENSRNOP00000040081	0	0	0	0	0.071	0.32	0	0.172	0.431
Spon1	Kcnc3	5052092	5046913	10116.ENSRNOP00000046944	10116.ENSRNOP00000027062	0	0	0	0	0.064	0	0	0.417	0.43
Stx3	Exoc8	5047506	5046795	10116.ENSRNOP00000028535	10116.ENSRNOP00000026757	0	0	0	0	0	0.111	0	0.384	0.429
Grin2a	Gap43	5050844	5037985	10116.ENSRNOP00000042235	10116.ENSRNOP00000002091	0	0	0	0	0.185	0.108	0	0.277	0.428
Tnnc2	Myo9a	5044323	5042754	10116.ENSRNOP00000020348	10116.ENSRNOP00000015963	0	0	0	0	0	0.395	0	0.092	0.427
Pvalb	Myo9a	5055033	5042754	10116.ENSRNOP00000058825	10116.ENSRNOP00000015963	0	0	0	0	0	0.395	0	0.092	0.427
Gpc1	Fubp1	5058794	5055892	10116.ENSRNOP00000066597	10116.ENSRNOP00000061544	0	0	0	0	0	0	0	0.426	0.426
Ddx21	Fam203a	5056514	5052248	10116.ENSRNOP00000063494	10116.ENSRNOP00000047549	0	0	0	0	0.425	0	0	0	0.425
Acy1	Ass1	5042712	5041377	10116.ENSRNOP00000015852	10116.ENSRNOP00000012075	0.098	0	0	0	0.176	0.044	0	0.286	0.425
Ndufs1	Surf1	5042711	5039586	10116.ENSRNOP00000015851	10116.ENSRNOP00000006855	0	0	0	0	0.064	0	0	0.409	0.424
Ufd1l	Sh3kbp1	5059183	5039538	10116.ENSRNOP00000067081	10116.ENSRNOP00000006741	0	0	0	0	0	0.422	0	0	0.422
Ubqln1	Hgs	5054843	5053445	10116.ENSRNOP00000057944	10116.ENSRNOP00000051849	0	0	0	0	0.063	0.286	0	0.203	0.42
Acy1	Ttc1	5042712	5039036	10116.ENSRNOP00000015852	10116.ENSRNOP00000005304	0	0	0	0	0	0.421	0	0	0.42
Sh3kbp1	Oas1b	5039538	5037898	10116.ENSRNOP00000006741	10116.ENSRNOP00000001853	0	0	0	0	0	0.421	0	0	0.42
Sh3kbp1	Oas1f	5039538	5037895	10116.ENSRNOP00000006741	10116.ENSRNOP00000001848	0	0	0	0	0	0.421	0	0	0.42
Oas1k	Sh3kbp1	5053955	5039538	10116.ENSRNOP00000054081	10116.ENSRNOP00000006741	0	0	0	0	0	0.421	0	0	0.42
Dhx8	Ddx25	5051064	5043269	10116.ENSRNOP00000043050	10116.ENSRNOP00000017307	0	0	0	0	0.086	0	0	0.391	0.419
Chfr	Oas1b	5053824	5037898	10116.ENSRNOP00000053478	10116.ENSRNOP00000001853	0	0	0	0	0.05	0.398	0	0.065	0.418
Oas1k	Chfr	5053955	5053824	10116.ENSRNOP00000054081	10116.ENSRNOP00000053478	0	0	0	0	0.05	0.398	0	0.065	0.418
Rnf25	Car8	5045210	5039894	10116.ENSRNOP00000022677	10116.ENSRNOP00000007802	0	0	0	0	0	0	0	0.419	0.418
Chfr	Oas1f	5053824	5037895	10116.ENSRNOP00000053478	10116.ENSRNOP00000001848	0	0	0	0	0.05	0.398	0	0.065	0.418
Ufd1l	Mpnd	5059183	5056817	10116.ENSRNOP00000067081	10116.ENSRNOP00000064107	0	0	0	0	0.175	0.086	0	0.289	0.417
Dhx8	Thoc1	5051064	5050962	10116.ENSRNOP00000043050	10116.ENSRNOP00000042658	0	0	0	0	0.063	0.253	0	0.235	0.417
Pvalb	Tac1	5055033	5040575	10116.ENSRNOP00000058825	10116.ENSRNOP00000009888	0	0	0	0	0.086	0	0	0.388	0.416
Tacr2	Chkb	5059338	5042542	10116.ENSRNOP00000067266	10116.ENSRNOP00000015374	0	0	0	0	0	0	0	0.417	0.416
Rab13	Arf2	5045191	5039455	10116.ENSRNOP00000022626	10116.ENSRNOP00000006483	0	0	0	0	0	0.114	0	0.368	0.416
Prl4a1	Gjb3	5044968	5043959	10116.ENSRNOP00000022027	10116.ENSRNOP00000019266	0	0	0	0	0	0	0	0.417	0.416
Cdh13	Chfr	5060004	5053824	10116.ENSRNOP00000068368	10116.ENSRNOP00000053478	0	0	0	0	0	0	0	0.415	0.415
Drd2	Adcy8	5051256	5039559	10116.ENSRNOP00000043759	10116.ENSRNOP00000006789	0	0	0	0	0.152	0.061	0	0.322	0.414
Rgs14	Gfra2	5044794	5043947	10116.ENSRNOP00000021596	10116.ENSRNOP00000019222	0	0	0	0	0	0	0	0.415	0.414
Clcn4	Mid1	5054403	5038873	10116.ENSRNOP00000056037	10116.ENSRNOP00000004873	0	0	0	0	0.063	0	0	0.401	0.414
Amt	Ass1	5058446	5041377	10116.ENSRNOP00000066155	10116.ENSRNOP00000012075	0	0	0	0	0.079	0	0	0.388	0.413
Dgat1	Slc30a3	5049071	5039987	10116.ENSRNOP00000035110	10116.ENSRNOP00000008126	0	0	0	0	0.374	0	0	0.1	0.412
Dusp6	Mapk9	5048591	5038586	10116.ENSRNOP00000032969	10116.ENSRNOP00000003987	0	0	0	0	0	0.266	0	0.231	0.411
Ddx21	Rbm22	5056514	5046506	10116.ENSRNOP00000063494	10116.ENSRNOP00000026087	0	0	0	0	0.063	0.397	0	0	0.41
Nt5c3b	B3gat1	5045122	5040557	10116.ENSRNOP00000022430	10116.ENSRNOP00000009825	0	0	0	0	0	0	0	0.41	0.41
Ddx21	Gfm1	5056514	5050270	10116.ENSRNOP00000063494	10116.ENSRNOP00000040081	0.042	0	0	0	0.162	0.287	0	0.09	0.409
Fhl1	Rnf25	5052814	5045210	10116.ENSRNOP00000049677	10116.ENSRNOP00000022677	0	0	0	0	0	0	0	0.408	0.408
Tmub2	Nap1l5	5053493	5040730	10116.ENSRNOP00000052057	10116.ENSRNOP00000010263	0	0	0	0	0	0	0	0.408	0.408
Zdhhc14	Dgat1	5053281	5049071	10116.ENSRNOP00000051330	10116.ENSRNOP00000035110	0	0	0	0	0.063	0	0	0.393	0.407
Gfm1	Sf3a3	5050270	5040766	10116.ENSRNOP00000040081	10116.ENSRNOP00000010373	0	0	0	0	0.083	0.25	0	0.208	0.407
Gpr139	Htr1d	5049655	5042786	10116.ENSRNOP00000037722	10116.ENSRNOP00000016047	0	0	0	0	0.092	0	0	0.374	0.407
Ercc3	Zfp238	5043654	5039225	10116.ENSRNOP00000018422	10116.ENSRNOP00000005849	0	0	0	0	0.062	0.052	0	0.387	0.407
Ercc3	Sf3a3	5043654	5040766	10116.ENSRNOP00000018422	10116.ENSRNOP00000010373	0	0	0	0	0	0	0	0.406	0.406
Kcnq3	Dpp6	5057823	5051083	10116.ENSRNOP00000065354	10116.ENSRNOP00000043113	0	0	0	0	0.206	0.05	0	0.273	0.405
Hgs	Ttc1	5053445	5039036	10116.ENSRNOP00000051849	10116.ENSRNOP00000005304	0	0	0	0	0	0.405	0	0	0.405
Clec2d2	Arf2	5058311	5039455	10116.ENSRNOP00000065983	10116.ENSRNOP00000006483	0	0	0	0	0	0.044	0	0.404	0.405
Drd2	Thop1	5051256	5046902	10116.ENSRNOP00000043759	10116.ENSRNOP00000027045	0	0	0	0	0	0.051	0	0.399	0.405
Grin2a	Slc25a18	5050844	5042605	10116.ENSRNOP00000042235	10116.ENSRNOP00000015561	0	0	0	0	0.152	0.087	0	0.293	0.404
Map6	Rfx3	5048371	5045635	10116.ENSRNOP00000032018	10116.ENSRNOP00000023762	0	0	0	0	0	0	0	0.404	0.404
Car5b	Mid1	5051123	5038873	10116.ENSRNOP00000043235	10116.ENSRNOP00000004873	0	0	0	0	0.063	0	0	0.39	0.403
Gpr85	Gap43	5048324	5037985	10116.ENSRNOP00000031780	10116.ENSRNOP00000002091	0	0	0	0	0.214	0	0	0.268	0.401
Mpnd	Ubqln1	5056817	5054843	10116.ENSRNOP00000064107	10116.ENSRNOP00000057944	0	0	0	0	0.064	0.257	0	0.208	0.401

## Sheet: Salmon
#node1	node2	node1_string_internal_id	node2_string_internal_id	node1_external_id	node2_external_id	neighborhood_on_chromosome	gene_fusion	phylogenetic_cooccurrence	homology	coexpression	experimentally_determined_interaction	database_annotated	automated_textmining	combined_score
Rps15a	Rps6	5045975	5040771	10116.ENSRNOP00000024678	10116.ENSRNOP00000010383	0	0	0	0	0.884	0.915	0.9	0.319	0.999
Vamp2	Syt1	5053960	5052797	10116.ENSRNOP00000054114	10116.ENSRNOP00000049624	0	0	0	0	0.193	0.585	0.9	0.937	0.997
Rps15a	Rps27a	5045975	5039234	10116.ENSRNOP00000024678	10116.ENSRNOP00000005872	0	0	0	0	0.922	0.587	0.9	0.151	0.996
Rps6	Rps27a	5040771	5039234	10116.ENSRNOP00000010383	10116.ENSRNOP00000005872	0	0	0	0	0.922	0.598	0.9	0.086	0.996
Mrpl46	Mrps15	5055863	5041202	10116.ENSRNOP00000061438	10116.ENSRNOP00000011565	0	0	0	0	0.654	0.843	0.9	0	0.994
Psma1	Psmb8	5042747	5037449	10116.ENSRNOP00000015946	10116.ENSRNOP00000000528	0	0	0	0	0.623	0.858	0.72	0.489	0.991
Slc17a7	Syt1	5056553	5052797	10116.ENSRNOP00000063604	10116.ENSRNOP00000049624	0	0	0	0	0.226	0	0.9	0.748	0.978
Src	Grin2b	5041622	5041252	10116.ENSRNOP00000012739	10116.ENSRNOP00000011697	0	0	0	0	0.08	0.215	0.9	0.698	0.975
Dlgap1	Grin2b	5045085	5041252	10116.ENSRNOP00000022351	10116.ENSRNOP00000011697	0	0	0	0	0.19	0.276	0.9	0.623	0.974
Unc13a	Unc13c	5046160	5040750	10116.ENSRNOP00000025162	10116.ENSRNOP00000010330	0	0	0	0.829	0.063	0.856	0.8	0.791	0.974
Slc17a7	Vamp2	5056553	5053960	10116.ENSRNOP00000063604	10116.ENSRNOP00000054114	0	0	0	0	0.138	0	0.9	0.715	0.973
Rps15a	Eif3h	5045975	5039200	10116.ENSRNOP00000024678	10116.ENSRNOP00000005786	0	0	0	0	0.305	0.597	0.9	0	0.969
Vamp2	Bet1	5053960	5042332	10116.ENSRNOP00000054114	10116.ENSRNOP00000014810	0	0	0	0	0.121	0.397	0.9	0.472	0.968
Vamp2	Dnm1	5053960	5052222	10116.ENSRNOP00000054114	10116.ENSRNOP00000047444	0	0	0	0	0.204	0.114	0.9	0.57	0.965
Nos1	Nos1ap	5056264	5049773	10116.ENSRNOP00000062735	10116.ENSRNOP00000038197	0	0	0	0	0	0.183	0.8	0.799	0.964
Syt1	Dnm1	5052797	5052222	10116.ENSRNOP00000049624	10116.ENSRNOP00000047444	0	0	0	0	0.24	0	0.9	0.539	0.961
Nsmaf	Smpd3	5042161	5037379	10116.ENSRNOP00000014289	10116.ENSRNOP00000000274	0	0	0	0	0	0	0.9	0.419	0.939
Rpl41	Rps15a	5056166	5045975	10116.ENSRNOP00000062398	10116.ENSRNOP00000024678	0	0	0	0	0.202	0	0.9	0.14	0.925
Chrm1	Gna11	5046017	5039787	10116.ENSRNOP00000024785	10116.ENSRNOP00000007498	0	0	0	0	0.063	0.114	0.9	0.173	0.922
Fbxl16	Trim9	5049221	5040463	10116.ENSRNOP00000035846	10116.ENSRNOP00000009559	0	0	0	0	0.224	0	0.9	0	0.919
Oxt	Chrm1	5047624	5046017	10116.ENSRNOP00000028829	10116.ENSRNOP00000024785	0	0	0	0	0.064	0	0.9	0.2	0.918
Nfkbib	Psmb8	5046974	5037449	10116.ENSRNOP00000027212	10116.ENSRNOP00000000528	0	0	0	0	0.049	0.141	0.9	0.057	0.912
Sstr5	Cnr1	5046269	5040945	10116.ENSRNOP00000025451	10116.ENSRNOP00000010850	0	0	0	0.571	0	0	0.9	0.302	0.911
Agtr2	Cnr1	5057301	5040945	10116.ENSRNOP00000064709	10116.ENSRNOP00000010850	0	0	0	0	0.063	0	0.9	0.132	0.911
Rnps1	Sarnp	5052309	5040319	10116.ENSRNOP00000047771	10116.ENSRNOP00000009155	0	0	0	0	0.135	0.052	0.9	0	0.91
Rnps1	Syf2	5052309	5045831	10116.ENSRNOP00000047771	10116.ENSRNOP00000024271	0	0	0	0	0.064	0	0.9	0.094	0.907
Sptbn2	Sptb	5046709	5040269	10116.ENSRNOP00000026573	10116.ENSRNOP00000009028	0	0	0	0.952	0.063	0	0.9	0.572	0.904
Rnps1	Rps15a	5052309	5045975	10116.ENSRNOP00000047771	10116.ENSRNOP00000024678	0	0	0	0	0.063	0	0.9	0.055	0.903
Fbxl16	Sh3rf1	5049221	5041990	10116.ENSRNOP00000035846	10116.ENSRNOP00000013815	0	0	0	0	0.064	0	0.9	0	0.902
Cyba	Kcnab2	5043358	5042707	10116.ENSRNOP00000017564	10116.ENSRNOP00000015840	0	0	0	0	0.063	0	0.9	0	0.902
Bet1	Sptb	5042332	5040269	10116.ENSRNOP00000014810	10116.ENSRNOP00000009028	0	0	0	0	0	0	0.9	0.058	0.901
Oxt	Gna11	5047624	5039787	10116.ENSRNOP00000028829	10116.ENSRNOP00000007498	0	0	0	0	0	0	0.9	0.059	0.901
Sptbn2	Bet1	5046709	5042332	10116.ENSRNOP00000026573	10116.ENSRNOP00000014810	0	0	0	0	0	0	0.9	0.058	0.901
Rpl41	Rnps1	5056166	5052309	10116.ENSRNOP00000062398	10116.ENSRNOP00000047771	0	0	0	0	0	0	0.9	0	0.9
Nos1	Grin2b	5056264	5041252	10116.ENSRNOP00000062735	10116.ENSRNOP00000011697	0	0	0	0	0.098	0.17	0.8	0.415	0.9
Sh3rf1	Trim9	5041990	5040463	10116.ENSRNOP00000013815	10116.ENSRNOP00000009559	0	0	0	0	0	0	0.9	0.043	0.9
Agtr2	Sstr5	5057301	5046269	10116.ENSRNOP00000064709	10116.ENSRNOP00000025451	0	0	0	0.769	0	0	0.9	0	0.9
Acadm	Hibadh	5041793	5041027	10116.ENSRNOP00000013238	10116.ENSRNOP00000011069	0.071	0	0	0	0.205	0	0.8	0.258	0.875
Syt1	Unc13a	5052797	5046160	10116.ENSRNOP00000049624	10116.ENSRNOP00000025162	0	0	0	0	0.321	0	0	0.797	0.856
ENSRNOG00000042929	Nos1ap	5055215	5049773	10116.ENSRNOP00000059417	10116.ENSRNOP00000038197	0	0.579	0	0	0	0	0	0.634	0.839
Nos1	Cacna1c	5056264	5040360	10116.ENSRNOP00000062735	10116.ENSRNOP00000009268	0	0	0	0	0.063	0.086	0.8	0.101	0.825
Gpx4	Txnrd2	5043763	5038145	10116.ENSRNOP00000018691	10116.ENSRNOP00000002593	0.066	0	0	0	0.064	0	0	0.812	0.822
Unc13a	Erc1	5046160	5041497	10116.ENSRNOP00000025162	10116.ENSRNOP00000012397	0	0	0	0	0.063	0.215	0	0.767	0.814
Kpna3	Kpna4	5048458	5042189	10116.ENSRNOP00000032371	10116.ENSRNOP00000014384	0	0	0	0.983	0.242	0.759	0	0.89	0.812
Vamp2	Unc13a	5053960	5046160	10116.ENSRNOP00000054114	10116.ENSRNOP00000025162	0	0	0	0	0.119	0.11	0	0.762	0.797
Bsn	Unc13a	5050014	5046160	10116.ENSRNOP00000039162	10116.ENSRNOP00000025162	0	0	0	0	0.233	0.155	0	0.699	0.788
Bsn	Erc1	5050014	5041497	10116.ENSRNOP00000039162	10116.ENSRNOP00000012397	0	0	0	0	0.063	0.114	0	0.754	0.778
Nos1	Dmd	5056264	5047891	10116.ENSRNOP00000062735	10116.ENSRNOP00000029969	0	0	0	0	0.061	0.306	0	0.634	0.74
Rps6	Eif3h	5040771	5039200	10116.ENSRNOP00000010383	10116.ENSRNOP00000005786	0	0	0	0	0.564	0.319	0	0.151	0.726
Src	Cacna1c	5041622	5040360	10116.ENSRNOP00000012739	10116.ENSRNOP00000009268	0	0	0	0	0	0.512	0	0.455	0.723
Ppara	Acadm	5049880	5041793	10116.ENSRNOP00000038651	10116.ENSRNOP00000013238	0	0	0	0	0.112	0	0	0.699	0.721
Nos1	ENSRNOG00000042929	5056264	5055215	10116.ENSRNOP00000062735	10116.ENSRNOP00000059417	0	0	0	0	0	0.089	0	0.693	0.709
Selk	Txnrd2	5044302	5038145	10116.ENSRNOP00000020284	10116.ENSRNOP00000002593	0	0	0	0	0	0	0	0.677	0.677
Slc17a7	Grin2b	5056553	5041252	10116.ENSRNOP00000063604	10116.ENSRNOP00000011697	0	0	0	0	0.22	0	0	0.598	0.673
Syt1	Erc1	5052797	5041497	10116.ENSRNOP00000049624	10116.ENSRNOP00000012397	0	0	0	0	0.063	0.158	0	0.61	0.665
Syt1	Cacna1b	5052797	5039330	10116.ENSRNOP00000049624	10116.ENSRNOP00000006162	0	0	0	0	0.226	0.469	0	0.249	0.664
Unc13a	Doc2b	5046160	5040081	10116.ENSRNOP00000025162	10116.ENSRNOP00000008429	0	0	0	0	0.094	0.138	0	0.598	0.658
Vamp2	Doc2b	5053960	5040081	10116.ENSRNOP00000054114	10116.ENSRNOP00000008429	0	0	0	0	0.064	0	0	0.642	0.651
Rps15a	Mrps15	5045975	5041202	10116.ENSRNOP00000024678	10116.ENSRNOP00000011565	0	0	0	0	0.379	0.399	0	0.126	0.645
Erc1	Unc13c	5041497	5040750	10116.ENSRNOP00000012397	10116.ENSRNOP00000010330	0	0	0	0	0.063	0.215	0	0.556	0.645
Mrps15	Rps6	5041202	5040771	10116.ENSRNOP00000011565	10116.ENSRNOP00000010383	0.044	0	0	0	0.377	0.399	0	0.126	0.645
Selk	Gpx4	5044302	5043763	10116.ENSRNOP00000020284	10116.ENSRNOP00000018691	0	0	0	0	0.063	0	0	0.622	0.631
Slc17a7	Bsn	5056553	5050014	10116.ENSRNOP00000063604	10116.ENSRNOP00000039162	0	0	0	0	0.217	0	0	0.548	0.631
Vamp2	Vapa	5053960	5044446	10116.ENSRNOP00000054114	10116.ENSRNOP00000020681	0	0	0	0	0.05	0.199	0	0.532	0.613
Dnm1	Src	5052222	5041622	10116.ENSRNOP00000047444	10116.ENSRNOP00000012739	0	0	0	0	0.154	0.181	0	0.479	0.608
Nos1ap	Zdhhc23	5049773	5049419	10116.ENSRNOP00000038197	10116.ENSRNOP00000036655	0	0	0	0	0	0	0	0.597	0.597
Kcnj8	Cacna1c	5043550	5040360	10116.ENSRNOP00000018057	10116.ENSRNOP00000009268	0	0	0	0	0.063	0	0	0.585	0.594
Syt1	Bsn	5052797	5050014	10116.ENSRNOP00000049624	10116.ENSRNOP00000039162	0	0	0	0	0.226	0.053	0	0.487	0.591
Slc17a7	Unc13a	5056553	5046160	10116.ENSRNOP00000063604	10116.ENSRNOP00000025162	0	0	0	0	0.154	0	0	0.534	0.589
Hsd17b12	Hibadh	5041640	5041027	10116.ENSRNOP00000012806	10116.ENSRNOP00000011069	0.052	0	0	0	0.561	0	0	0.077	0.582
Foxp1	Grin2b	5041805	5041252	10116.ENSRNOP00000013271	10116.ENSRNOP00000011697	0	0	0	0	0.064	0	0	0.566	0.577
Iqsec3	Erc1	5043835	5041497	10116.ENSRNOP00000018902	10116.ENSRNOP00000012397	0	0	0	0	0.05	0	0	0.567	0.571
Ppara	Cnr1	5049880	5040945	10116.ENSRNOP00000038651	10116.ENSRNOP00000010850	0	0	0	0	0	0	0	0.556	0.556
Dlgap1	Trim9	5045085	5040463	10116.ENSRNOP00000022351	10116.ENSRNOP00000009559	0	0	0	0	0.179	0	0	0.478	0.553
ENSRNOG00000046891	Pfkfb3	5058805	5056338	10116.ENSRNOP00000066611	10116.ENSRNOP00000062965	0	0	0	0	0.064	0.086	0	0.515	0.549
Psma1	Nsmaf	5042747	5042161	10116.ENSRNOP00000015946	10116.ENSRNOP00000014289	0	0	0	0	0	0.044	0	0.534	0.535
Vamp2	Bsn	5053960	5050014	10116.ENSRNOP00000054114	10116.ENSRNOP00000039162	0	0	0	0	0.148	0	0	0.474	0.533
Dnm1	Bsn	5052222	5050014	10116.ENSRNOP00000047444	10116.ENSRNOP00000039162	0	0	0	0	0.229	0.305	0	0.195	0.531
Nolc1	Lsg1	5046390	5038066	10116.ENSRNOP00000025788	10116.ENSRNOP00000002354	0	0	0	0	0.517	0	0	0.065	0.529
Smad3	Src	5049566	5041622	10116.ENSRNOP00000037346	10116.ENSRNOP00000012739	0	0	0	0	0.063	0.11	0	0.48	0.529
Grin2b	Doc2b	5041252	5040081	10116.ENSRNOP00000011697	10116.ENSRNOP00000008429	0	0	0	0	0.049	0	0	0.522	0.525
Psma1	Eif3h	5042747	5039200	10116.ENSRNOP00000015946	10116.ENSRNOP00000005786	0	0	0	0	0.489	0	0	0.103	0.523
Bsn	Jph4	5050014	5048980	10116.ENSRNOP00000039162	10116.ENSRNOP00000034702	0	0	0	0	0.225	0	0	0.408	0.522
Vamp2	Erc1	5053960	5041497	10116.ENSRNOP00000054114	10116.ENSRNOP00000012397	0	0	0	0	0.064	0	0	0.509	0.521
Zdhhc8	2019-09-05	5050334	5050250	10116.ENSRNOP00000040329	10116.ENSRNOP00000039995	0	0	0	0	0.098	0	0	0.485	0.516
ENSRNOG00000046891	Src	5058805	5041622	10116.ENSRNOP00000066611	10116.ENSRNOP00000012739	0	0	0	0	0.087	0.181	0	0.399	0.512
Cyba	Src	5043358	5041622	10116.ENSRNOP00000017564	10116.ENSRNOP00000012739	0	0	0	0	0.063	0	0	0.499	0.51
Syt1	Unc13c	5052797	5040750	10116.ENSRNOP00000049624	10116.ENSRNOP00000010330	0	0	0	0	0.194	0	0	0.413	0.506
Slc17a7	Sstr5	5056553	5046269	10116.ENSRNOP00000063604	10116.ENSRNOP00000025451	0	0	0	0	0	0	0	0.499	0.499
Rtn3	Vapa	5047610	5044446	10116.ENSRNOP00000028785	10116.ENSRNOP00000020681	0	0	0	0	0.063	0.406	0	0.16	0.491
Mrps15	Eif3h	5041202	5039200	10116.ENSRNOP00000011565	10116.ENSRNOP00000005786	0	0	0	0	0.139	0.415	0	0.065	0.487
Rps15a	Npm1	5045975	5039496	10116.ENSRNOP00000024678	10116.ENSRNOP00000006591	0	0	0	0	0.408	0	0	0.163	0.483
Bsn	Grin2b	5050014	5041252	10116.ENSRNOP00000039162	10116.ENSRNOP00000011697	0	0	0	0	0.211	0.174	0	0.263	0.478
Vamp2	Trim9	5053960	5040463	10116.ENSRNOP00000054114	10116.ENSRNOP00000009559	0	0	0	0	0.159	0	0	0.404	0.477
Zdhhc8	Txnrd2	5050334	5038145	10116.ENSRNOP00000040329	10116.ENSRNOP00000002593	0	0	0	0	0.063	0	0	0.465	0.477
Dnm1	2019-09-05	5052222	5050250	10116.ENSRNOP00000047444	10116.ENSRNOP00000039995	0.044	0	0	0	0.22	0	0	0.352	0.474
Syt1	Lppr2	5052797	5043074	10116.ENSRNOP00000049624	10116.ENSRNOP00000016790	0	0	0	0	0.174	0	0	0.39	0.474
Bsn	Prkar2a	5050014	5047112	10116.ENSRNOP00000039162	10116.ENSRNOP00000027552	0	0	0	0	0.472	0	0	0	0.472
Nos1	Cyba	5056264	5043358	10116.ENSRNOP00000062735	10116.ENSRNOP00000017564	0	0	0	0	0	0	0	0.471	0.471
Nos1ap	Dmd	5049773	5047891	10116.ENSRNOP00000038197	10116.ENSRNOP00000029969	0	0	0	0	0.064	0	0	0.452	0.465
Slc17a7	Chrm1	5056553	5046017	10116.ENSRNOP00000063604	10116.ENSRNOP00000024785	0	0	0	0	0.322	0	0	0.239	0.462
Rps15a	Nudt2	5045975	5043414	10116.ENSRNOP00000024678	10116.ENSRNOP00000017712	0	0	0	0	0.064	0.449	0	0	0.462
Nudt2	Rps6	5043414	5040771	10116.ENSRNOP00000017712	10116.ENSRNOP00000010383	0	0	0	0	0.073	0.44	0	0	0.458
Nos1	Src	5056264	5041622	10116.ENSRNOP00000062735	10116.ENSRNOP00000012739	0	0	0	0	0	0.11	0	0.414	0.456
Chrm1	Cacna1b	5046017	5039330	10116.ENSRNOP00000024785	10116.ENSRNOP00000006162	0	0	0	0	0.235	0.068	0	0.297	0.456
Cacna1c	Cacna1b	5040360	5039330	10116.ENSRNOP00000009268	10116.ENSRNOP00000006162	0	0	0	0.865	0.087	0	0.36	0.745	0.451
Syt1	Grin2b	5052797	5041252	10116.ENSRNOP00000049624	10116.ENSRNOP00000011697	0	0	0	0	0.225	0.153	0	0.23	0.45
Fbxl16	Unc13a	5049221	5046160	10116.ENSRNOP00000035846	10116.ENSRNOP00000025162	0	0	0	0	0.213	0	0	0.329	0.449
Jph4	Dlgap1	5048980	5045085	10116.ENSRNOP00000034702	10116.ENSRNOP00000022351	0	0	0	0	0.207	0	0	0.328	0.444
Agtr2	Nos1	5057301	5056264	10116.ENSRNOP00000064709	10116.ENSRNOP00000062735	0	0	0	0	0	0.044	0	0.442	0.443
Nos1	Sptb	5056264	5040269	10116.ENSRNOP00000062735	10116.ENSRNOP00000009028	0	0	0	0	0.063	0.069	0	0.408	0.438
Nudt2	Rps27a	5043414	5039234	10116.ENSRNOP00000017712	10116.ENSRNOP00000005872	0	0	0	0	0.064	0.421	0	0	0.434
Irx5	Pbx2	5042508	5037440	10116.ENSRNOP00000015272	10116.ENSRNOP00000000509	0	0	0	0.557	0	0.406	0	0.138	0.432
Surf2	Mrpl46	5058197	5055863	10116.ENSRNOP00000065830	10116.ENSRNOP00000061438	0	0	0	0	0.063	0	0	0.419	0.432
Dnm1	Apaf1	5052222	5040952	10116.ENSRNOP00000047444	10116.ENSRNOP00000010869	0	0	0	0	0.063	0.201	0	0.296	0.427
Grin2b	Cnr1	5041252	5040945	10116.ENSRNOP00000011697	10116.ENSRNOP00000010850	0	0	0	0	0.177	0	0	0.327	0.423
Mmp16	Src	5050307	5041622	10116.ENSRNOP00000040229	10116.ENSRNOP00000012739	0	0	0	0	0	0	0	0.415	0.415
H2afy	Rps27a	5052668	5039234	10116.ENSRNOP00000049143	10116.ENSRNOP00000005872	0	0	0	0	0.064	0.396	0	0.047	0.414
Bsn	Dlgap1	5050014	5045085	10116.ENSRNOP00000039162	10116.ENSRNOP00000022351	0	0	0	0	0.193	0	0	0.303	0.414
Nos1ap	Trim9	5049773	5040463	10116.ENSRNOP00000038197	10116.ENSRNOP00000009559	0	0	0	0	0.072	0	0	0.391	0.41
Chmp5	Unc13c	5041323	5040750	10116.ENSRNOP00000011907	10116.ENSRNOP00000010330	0	0	0	0	0	0	0	0.409	0.408
Slc17a7	Nos1	5056553	5056264	10116.ENSRNOP00000063604	10116.ENSRNOP00000062735	0	0	0	0	0.084	0	0	0.378	0.406
Slc17a7	Erc1	5056553	5041497	10116.ENSRNOP00000063604	10116.ENSRNOP00000012397	0	0	0	0	0.05	0	0	0.4	0.405
Bsn	Unc13c	5050014	5040750	10116.ENSRNOP00000039162	10116.ENSRNOP00000010330	0	0	0	0	0.108	0.114	0	0.305	0.403
Bsn	Cacna1b	5050014	5039330	10116.ENSRNOP00000039162	10116.ENSRNOP00000006162	0	0	0	0	0.239	0	0	0.247	0.402
Zdhhc23	Pou3f4	5049419	5038492	10116.ENSRNOP00000036655	10116.ENSRNOP00000003724	0	0	0	0	0	0	0	0.4	0.4
