# Supplementary material for: Genetic regulatory subnetworks and key regulating genes in rat hippocampus perturbed by prenatal malnutrition: implications for major brain disorders
Source: Aging (Albany NY). 2020 May 11;12(9):8434–58. doi: 10.18632/aging.103150 (PMC7244046; doi:10.18632/aging.103150)
Supplement: Supplementary Table 5 [file aging-12-103150-s001.xlsx]

## Sheet: miRNA-hub
Module	miRNA Name	Gene ID	Gene Symbol	Transcript Accession	Gene Description
blue	rno-miR-3099	363254	Atg9a	NM_001014218	autophagy related 9A
blue	rno-miR-3586-5p	363254	Atg9a	NM_001014218	autophagy related 9A
blue	rno-miR-344b-1-3p	363254	Atg9a	NM_001014218	autophagy related 9A
blue	rno-miR-410-3p	363254	Atg9a	NM_001014218	autophagy related 9A
blue	rno-miR-5132-5p	363254	Atg9a	NM_001014218	autophagy related 9A
blue	rno-miR-708-5p	363254	Atg9a	NM_001014218	autophagy related 9A
blue	rno-miR-742-3p	363254	Atg9a	NM_001014218	autophagy related 9A
blue	rno-miR-96-5p	363254	Atg9a	NM_001014218	autophagy related 9A
blue	rno-miR-28-5p	363254	Atg9a	NM_001014218	autophagy related 9A
blue	rno-miR-3573-5p	286923	Dlgap3	NM_001276304	DLG associated protein 3
blue	rno-miR-423-5p	286923	Dlgap3	NM_001276304	DLG associated protein 3
blue	rno-miR-299a-3p	286923	Dlgap3	NM_001276304	DLG associated protein 3
blue	rno-miR-299b-3p	286923	Dlgap3	NM_001276304	DLG associated protein 3
blue	rno-miR-3541	286923	Dlgap3	NM_001276304	DLG associated protein 3
blue	rno-miR-101a-3p	286923	Dlgap3	NM_001276304	DLG associated protein 3
blue	rno-miR-101b-3p	286923	Dlgap3	NM_001276304	DLG associated protein 3
blue	rno-miR-3564	286923	Dlgap3	NM_001276304	DLG associated protein 3
blue	rno-let-7a-2-3p	286923	Dlgap3	NM_001276304	DLG associated protein 3
blue	rno-let-7g-3p	286923	Dlgap3	NM_001276304	DLG associated protein 3
blue	rno-miR-128-3p	286923	Dlgap3	NM_001276304	DLG associated protein 3
blue	rno-miR-331-3p	54281	Furin	NM_019331	furin (paired basic amino acid cleaving enzyme)
blue	rno-miR-128-3p	54281	Furin	NM_019331	furin (paired basic amino acid cleaving enzyme)
blue	rno-miR-653-5p	54281	Furin	NM_019331	furin (paired basic amino acid cleaving enzyme)
blue	rno-miR-18a-3p	54281	Furin	NM_019331	furin (paired basic amino acid cleaving enzyme)
blue	rno-miR-9a-5p	54281	Furin	NM_019331	furin (paired basic amino acid cleaving enzyme)
blue	rno-miR-137-3p	54281	Furin	NM_019331	furin (paired basic amino acid cleaving enzyme)
blue	rno-miR-153-3p	54281	Furin	NM_019331	furin (paired basic amino acid cleaving enzyme)
blue	rno-miR-20a-5p	54281	Furin	NM_019331	furin (paired basic amino acid cleaving enzyme)
blue	rno-miR-106b-5p	54281	Furin	NM_019331	furin (paired basic amino acid cleaving enzyme)
blue	rno-miR-20b-5p	54281	Furin	NM_019331	furin (paired basic amino acid cleaving enzyme)
blue	rno-miR-17-5p	54281	Furin	NM_019331	furin (paired basic amino acid cleaving enzyme)
blue	rno-miR-93-5p	54281	Furin	NM_019331	furin (paired basic amino acid cleaving enzyme)
blue	rno-miR-6331	54281	Furin	NM_019331	furin (paired basic amino acid cleaving enzyme)
blue	rno-miR-219a-5p	54281	Furin	NM_019331	furin (paired basic amino acid cleaving enzyme)
blue	rno-miR-6318	54281	Furin	NM_019331	furin (paired basic amino acid cleaving enzyme)
blue	rno-miR-124-3p	54281	Furin	NM_019331	furin (paired basic amino acid cleaving enzyme)
blue	rno-miR-34a-3p	54281	Furin	NM_019331	furin (paired basic amino acid cleaving enzyme)
blue	rno-miR-3573-5p	54281	Furin	NM_019331	furin (paired basic amino acid cleaving enzyme)
blue	rno-miR-423-5p	54281	Furin	NM_019331	furin (paired basic amino acid cleaving enzyme)
blue	rno-miR-3068-3p	54281	Furin	NM_019331	furin (paired basic amino acid cleaving enzyme)
blue	rno-miR-3541	54281	Furin	NM_019331	furin (paired basic amino acid cleaving enzyme)
blue	rno-miR-3594-5p	54281	Furin	NM_019331	furin (paired basic amino acid cleaving enzyme)
blue	rno-miR-3593-5p	300066	Gga1	NM_001011994	golgi associated, gamma adaptin ear containing, ARF binding protein 1
blue	rno-miR-124-3p	300066	Gga1	NM_001011994	golgi associated, gamma adaptin ear containing, ARF binding protein 1
blue	rno-miR-24-3p	300066	Gga1	NM_001011994	golgi associated, gamma adaptin ear containing, ARF binding protein 1
blue	rno-miR-370-3p	300066	Gga1	NM_001011994	golgi associated, gamma adaptin ear containing, ARF binding protein 1
blue	rno-miR-337-3p	300066	Gga1	NM_001011994	golgi associated, gamma adaptin ear containing, ARF binding protein 1
blue	rno-miR-3473	300066	Gga1	NM_001011994	golgi associated, gamma adaptin ear containing, ARF binding protein 1
blue	rno-miR-770-3p	300066	Gga1	NM_001011994	golgi associated, gamma adaptin ear containing, ARF binding protein 1
blue	rno-miR-3576	300066	Gga1	NM_001011994	golgi associated, gamma adaptin ear containing, ARF binding protein 1
blue	rno-miR-363-5p	300066	Gga1	NM_001011994	golgi associated, gamma adaptin ear containing, ARF binding protein 1
blue	rno-miR-212-5p	24418	Grm5	NM_017012	glutamate metabotropic receptor 5
blue	rno-miR-412-3p	24418	Grm5	NM_017012	glutamate metabotropic receptor 5
blue	rno-miR-3572	360704	Hmgn1	NM_001013184	high mobility group nucleosome binding domain 1
blue	rno-miR-216b-3p	360704	Hmgn1	NM_001013184	high mobility group nucleosome binding domain 1
blue	rno-miR-673-5p	360704	Hmgn1	NM_001013184	high mobility group nucleosome binding domain 1
blue	rno-let-7c-1-3p	360704	Hmgn1	NM_001013184	high mobility group nucleosome binding domain 1
blue	rno-miR-3570	360704	Hmgn1	NM_001013184	high mobility group nucleosome binding domain 1
blue	rno-miR-126b	360704	Hmgn1	NM_001013184	high mobility group nucleosome binding domain 1
blue	rno-miR-151-5p	360704	Hmgn1	NM_001013184	high mobility group nucleosome binding domain 1
blue	rno-miR-350	360704	Hmgn1	NM_001013184	high mobility group nucleosome binding domain 1
blue	rno-miR-3585-5p	360704	Hmgn1	NM_001013184	high mobility group nucleosome binding domain 1
blue	rno-miR-383-3p	360704	Hmgn1	NM_001013184	high mobility group nucleosome binding domain 1
blue	rno-miR-1-3p	360704	Hmgn1	NM_001013184	high mobility group nucleosome binding domain 1
blue	rno-miR-206-3p	360704	Hmgn1	NM_001013184	high mobility group nucleosome binding domain 1
blue	rno-miR-30b-3p	360704	Hmgn1	NM_001013184	high mobility group nucleosome binding domain 1
blue	rno-miR-1b	360704	Hmgn1	NM_001013184	high mobility group nucleosome binding domain 1
blue	rno-miR-336-3p	360704	Hmgn1	NM_001013184	high mobility group nucleosome binding domain 1
blue	rno-miR-222-3p	360704	Hmgn1	NM_001013184	high mobility group nucleosome binding domain 1
blue	rno-miR-221-3p	360704	Hmgn1	NM_001013184	high mobility group nucleosome binding domain 1
blue	rno-miR-493-5p	360704	Hmgn1	NM_001013184	high mobility group nucleosome binding domain 1
blue	rno-let-7g-3p	360704	Hmgn1	NM_001013184	high mobility group nucleosome binding domain 1
blue	rno-let-7a-2-3p	360704	Hmgn1	NM_001013184	high mobility group nucleosome binding domain 1
blue	rno-miR-33-5p	360704	Hmgn1	NM_001013184	high mobility group nucleosome binding domain 1
blue	rno-miR-18a-3p	306004	Rhobtb2	NM_001013133	Rho-related BTB domain containing 2
blue	rno-miR-3569	306004	Rhobtb2	NM_001013133	Rho-related BTB domain containing 2
Pink	rno-miR-218a-5p	84357	Sh3kbp1	NM_053360	SH3 domain-containing kinase-binding protein 1
Pink	rno-miR-448-3p	84357	Sh3kbp1	NM_053360	SH3 domain-containing kinase-binding protein 1
Pink	rno-miR-96-5p	84357	Sh3kbp1	NM_053360	SH3 domain-containing kinase-binding protein 1
Pink	rno-miR-326-5p	84357	Sh3kbp1	NM_053360	SH3 domain-containing kinase-binding protein 1
Pink	rno-miR-130a-5p	84357	Sh3kbp1	NM_053360	SH3 domain-containing kinase-binding protein 1
Pink	rno-miR-3590-3p	84357	Sh3kbp1	NM_053360	SH3 domain-containing kinase-binding protein 1
Pink	rno-miR-340-5p	84357	Sh3kbp1	NM_053360	SH3 domain-containing kinase-binding protein 1
Pink	rno-miR-129-5p	84357	Sh3kbp1	NM_053360	SH3 domain-containing kinase-binding protein 1
Pink	rno-miR-377-3p	84357	Sh3kbp1	NM_053360	SH3 domain-containing kinase-binding protein 1
Pink	rno-miR-374-3p	84357	Sh3kbp1	NM_053360	SH3 domain-containing kinase-binding protein 1
Pink	rno-miR-136-3p	84357	Sh3kbp1	NM_053360	SH3 domain-containing kinase-binding protein 1
Pink	rno-miR-1199-5p	84357	Sh3kbp1	NM_053360	SH3 domain-containing kinase-binding protein 1
Pink	rno-miR-1949	84357	Sh3kbp1	NM_053360	SH3 domain-containing kinase-binding protein 1
Pink	rno-miR-92a-2-5p	84357	Sh3kbp1	NM_053360	SH3 domain-containing kinase-binding protein 1
Pink	rno-miR-153-3p	84357	Sh3kbp1	NM_053360	SH3 domain-containing kinase-binding protein 1
Pink	rno-miR-15b-3p	84357	Sh3kbp1	NM_053360	SH3 domain-containing kinase-binding protein 1
Pink	rno-miR-3562	84357	Sh3kbp1	NM_053360	SH3 domain-containing kinase-binding protein 1
Pink	rno-miR-124-3p	84357	Sh3kbp1	NM_053360	SH3 domain-containing kinase-binding protein 1
Pink	rno-miR-142-5p	84357	Sh3kbp1	NM_053360	SH3 domain-containing kinase-binding protein 1
Pink	rno-miR-182	84357	Sh3kbp1	NM_053360	SH3 domain-containing kinase-binding protein 1
Pink	rno-miR-664-1-5p	84357	Sh3kbp1	NM_053360	SH3 domain-containing kinase-binding protein 1
Pink	rno-miR-664-2-5p	84357	Sh3kbp1	NM_053360	SH3 domain-containing kinase-binding protein 1
Pink	rno-miR-224-5p	84357	Sh3kbp1	NM_053360	SH3 domain-containing kinase-binding protein 1
Pink	rno-miR-291a-5p	114590	Ubqln1	NM_053747	ubiquilin 1
Pink	rno-miR-29b-5p	114590	Ubqln1	NM_053747	ubiquilin 1
Pink	rno-miR-365-3p	114590	Ubqln1	NM_053747	ubiquilin 1
Pink	rno-miR-155-5p	114590	Ubqln1	NM_053747	ubiquilin 1
Salmon	rno-miR-135b-5p	64829	Unc13a	NM_022861	unc-13 homolog A
Salmon	rno-miR-135a-5p	64829	Unc13a	NM_022861	unc-13 homolog A

## Sheet: TF-hub
TF	Gene
DEC	Gga1
NCX	Gga1
MYOGNF1	Gga1
SREBP1	Grm5
TFE	Grm5
EBOX	Grm5
TFE	Grm5
EBOX	Grm5
OCT	Grm5
AMEF2	Rhobtb2
CEBPA	Rhobtb2
OCT	Rhobtb2
ZTA	Rhobtb2
PBX1	Rhobtb2
ZIC1	Ubqln1
ZIC3	Ubqln1
SREBP1	Unc13a
ZNF219	Unc13a
AML1	Unc13a
NCX	Rpl23
OLF1	Rpl23
MAF	Rpl23
GATA4	Rpl23
SRF	Rpl23
TCF4	Ssbp1
LEF1TCF1	Ssbp1
SOX	Ssbp1
RORA1	Ssbp1
OCT	Ssbp1
SOX	Ssbp1
HNF4_DR1	Ssbp1
FOXO4	Dhcr24
LEF1TCF1	Dhcr24
TCF4	Dhcr24
LEF1TCF1	Dhcr24
LEF1TCF1	Scn2b
CAP	Scn2b
MIF1	Scn2b
HAND1E47	Scn2b
SMAD4	Scn2b
PAX3	Scn2b
PAX	Scn2b
TEF1	Scn2b
POLY	Scn2b
NRSF	Scn2b
XBP1	Scn2b
LPOLYA	Scn2b
CMAF	Scn2b
