# Supplementary material for: Genetic regulatory subnetworks and key regulating genes in rat hippocampus perturbed by prenatal malnutrition: implications for major brain disorders
Source: Aging (Albany NY). 2020 May 11;12(9):8434–58. doi: 10.18632/aging.103150 (PMC7244046; doi:10.18632/aging.103150)
Supplement: Supplementary Table 6 [file aging-12-103150-s008.xlsx]

## Sheet: H_NOR
	F6F2H	F3F2H	F2F2H	F5M2H	F6M4H	F7M4H	C2F2H	C4F3H	C3M4H	C5M3H	C4M3H	F3F3H	F2F1H	F7M3H	F7M2H	C5F1H	C5M1H
ENSRNOG00000000007	13.0214	13.1171	13.4371	13.4851	12.6561	13.0871	13.1992	13.3025	13.1349	12.9245	13.2897	13.1661	13.4308	13.0999	13.1603	12.5511	13.5195
ENSRNOG00000000034	10.5553	9.83503	10.3171	10.1568	9.82935	9.88988	9.50086	9.49698	9.71249	10.2917	9.91336	10.0632	9.98248	9.89577	10.1072	10.0368	9.81517
ENSRNOG00000000041	8.30103	8.09781	8.13047	8.23161	8.14412	8.35834	8.69412	8.73216	8.4148	8.0949	8.63919	8.23473	7.74195	8.37745	8.72981	8.69948	8.12757
ENSRNOG00000000044	12.436	12.4311	12.4305	12.4103	12.4433	12.4318	12.4944	12.5543	12.5368	12.3999	12.5447	12.4441	12.4195	12.5182	12.4765	12.4796	12.4178
ENSRNOG00000000047	14.5727	14.0879	14.3361	14.1027	14.564	14.4065	14.444	14.2747	14.2599	14.6284	14.2464	14.3694	14.5556	14.2907	14.409	14.2308	14.3049
ENSRNOG00000000048	13.1068	13.0059	13.1012	13.185	13.1977	13.1492	13.1693	13.1889	13.1995	13.141	13.1094	13.1306	13.1347	13.1045	13.1899	13.2778	12.993
ENSRNOG00000000053	5.891	6.00789	6.00228	5.81792	5.72508	6.16746	5.89418	5.59395	5.87598	6.04955	5.70084	5.96113	6.15431	5.81239	6.07187	5.67653	5.75204
ENSRNOG00000000060	14.8779	14.7848	14.7603	14.8877	14.4965	14.598	14.6824	14.6385	14.6167	14.4235	14.6314	14.6836	14.4389	14.5986	14.7094	14.5292	15.0931
ENSRNOG00000000064	13.9495	13.8296	13.8844	13.7716	13.8578	13.8616	13.6184	13.6956	13.8629	13.4399	13.9675	13.8351	13.67	13.8462	13.8451	13.9299	13.7055
ENSRNOG00000000073	10.3712	10.5136	10.639	10.1914	10.7071	10.8261	10.3707	9.61036	9.98772	10.4786	10.0777	10.5388	10.3645	10.4274	10.8092	10.6102	9.62136
ENSRNOG00000000096	10.1175	10.1801	10.0922	10.2352	10.5235	10.0776	10.4413	10.5356	9.99045	10.1134	10.185	10.2022	10.0712	10.2924	10.2302	10.1381	10.3863
ENSRNOG00000000105	14.6204	14.9085	14.7445	14.5898	14.7015	14.668	14.813	14.7567	14.717	14.7725	14.6691	14.7075	14.71	14.6962	14.7287	14.5064	14.9675
ENSRNOG00000000108	12.5507	11.7956	12.1618	12.1013	12.1309	12.2175	11.7818	11.7739	11.9856	12.285	12.0832	12.1393	12.1425	11.8791	12.2746	12.3699	11.7645
ENSRNOG00000000109	5.36415	5.1181	5.07632	4.89933	4.68529	4.45093	4.98284	5.10341	5.84206	5.64791	5.0886	5.01686	4.95044	5.07684	5.53037	5.16686	4.78919
ENSRNOG00000000121	9.92688	9.43602	9.76384	9.76572	9.44972	9.6244	9.4529	9.60371	9.62134	9.66212	9.67934	9.68132	9.59014	9.78934	9.7858	9.69062	9.34729
ENSRNOG00000000122	12.4361	12.0096	12.3943	12.0652	12.2499	12.2988	12.11	11.9095	11.9733	12.0499	12.0602	12.2324	12.126	12.2727	12.2388	12.0414	12.0832
ENSRNOG00000000127	10.0285	10.0286	9.91213	9.9529	9.57173	9.68364	10.3196	10.2397	10.1591	10.2371	9.7742	9.86811	9.30944	10.1027	10.2234	10.0535	10.1947
ENSRNOG00000000133	13.8525	13.6412	13.8118	13.8107	13.4513	13.3718	13.1554	13.444	13.6177	13.6384	13.5377	13.6157	13.5013	13.5307	13.5704	13.6396	13.6605
ENSRNOG00000000145	13.4949	13.1861	13.3177	13.5588	13.3394	13.2088	13.0372	13.0935	13.1491	13.2231	13.014	13.3188	13.447	13.038	13.2787	13.1246	13.352
ENSRNOG00000000155	11.1325	11.0232	11.0861	11.1136	11.3518	11.3146	11.2879	11.2117	10.9333	11.198	11.07	11.1587	11.0578	11.1425	11.2057	11.2978	11.0803
ENSRNOG00000000156	7.29832	5.76337	6.80839	5.9667	7.28126	7.52389	7.49859	7.19376	7.05283	7.04792	7.21493	6.84203	6.96563	6.98665	6.98402	7.19873	6.63018
ENSRNOG00000000157	10.7433	11.0867	10.9668	11.0133	10.8695	10.9537	10.9675	10.9592	10.9352	10.7492	10.8698	10.9176	10.7579	10.9562	10.9109	10.9541	11.0171
ENSRNOG00000000158	14.1855	14.1718	14.3813	13.8961	14.5657	14.5447	14.2717	14.179	14.2005	14.283	14.2639	14.2996	14.198	14.4688	14.2847	14.4985	13.9072
ENSRNOG00000000161	11.4085	10.8664	11.0586	11.322	10.5978	10.6294	10.6905	11.2741	11.0614	11.2748	11.1989	10.9735	10.826	11.031	11.0215	11.0947	11.1638
ENSRNOG00000000164	12.4434	12.0744	12.1744	12.044	12.3411	12.1623	12.3015	11.908	11.9091	12.2778	12.0557	12.1917	12.1118	12.0471	12.3269	12.0782	12.2276
ENSRNOG00000000165	6.18162	5.82703	5.92892	6.53413	6.09796	6.59843	6.53354	6.37815	6.79978	6.46667	6.605	6.28148	6.90425	6.18253	6.27844	6.72982	5.65435
ENSRNOG00000000166	10.1616	10.1253	10.0436	10.0498	9.7935	10.0009	9.87961	9.9151	10.0672	9.9193	9.94869	10.0397	9.81048	10.1905	10.1818	10.0229	9.78002
ENSRNOG00000000167	10.776	8.96588	9.87463	9.22443	10.2743	9.92839	8.99514	8.8807	9.88016	8.98374	9.56192	9.85726	10.162	10.1338	9.37595	9.49574	8.88505
ENSRNOG00000000168	13.968	13.7865	13.8576	13.7605	14.1236	13.812	13.9992	13.8944	13.8506	13.9604	13.7206	13.9027	14.0916	13.8369	13.8874	13.6039	14.0151
ENSRNOG00000000170	11.692	11.4024	11.4609	11.7899	11.5324	11.4748	11.9014	11.7899	11.5402	11.8085	11.6284	11.5593	11.4403	11.6644	11.5768	11.7494	11.7131
ENSRNOG00000000172	10.739	10.31	10.6913	10.8099	10.7973	10.4935	10.6258	10.1949	10.3571	10.5124	10.3887	10.6257	10.6512	10.422	10.7171	10.59	10.3631
ENSRNOG00000000177	11.6694	10.7011	11.0962	10.7014	11.0354	11.1489	10.6722	10.7011	10.9352	11.7276	11.206	11.0753	11.261	11.1594	10.9044	11.2859	10.6724
ENSRNOG00000000185	10.3287	10.2241	10.5554	10.1896	10.3793	10.4352	10.2322	10.1123	10.2617	10.2173	10.3543	10.3092	9.97598	10.3454	10.3489	10.669	10.1622
ENSRNOG00000000186	12.2649	12.293	12.3075	12.2207	12.0244	12.1205	12.0625	12.0609	12.2412	11.7946	12.1981	12.1981	11.9754	12.2759	12.3009	12.068	12.1339
ENSRNOG00000000187	7.62049	7.44422	7.62384	7.8748	7.65473	7.47959	7.98969	7.92305	7.4953	8.34173	7.85523	7.71848	8.0843	7.83556	7.84876	7.5834	7.40013
ENSRNOG00000000195	9.83249	9.10339	9.24223	9.31106	9.2621	9.57767	8.76212	9.12541	9.22413	9.32053	9.4844	9.33154	9.25852	8.96327	9.4331	9.75576	9.08647
ENSRNOG00000000201	5.71211	5.62136	5.63619	5.82087	5.64772	5.91308	5.81595	5.36728	6.11556	5.10994	5.09736	5.68403	5.24869	5.60674	5.9495	5.98648	5.36198
ENSRNOG00000000204	11.2862	11.3446	11.2571	11.3317	11.4879	11.4857	11.5043	11.5431	11.373	11.5112	11.0928	11.3926	11.5596	11.4399	11.341	11.1927	11.3894
ENSRNOG00000000221	11.2895	10.8639	11.0338	10.7843	11.2991	11.3604	11.0338	10.9816	11.0878	11.199	11.2098	11.1244	11.2452	11.1029	11.1406	11.2877	10.7554
ENSRNOG00000000233	8.02977	7.74147	8.16429	7.58882	7.81682	8.17829	8.73601	8.68796	8.67087	8.41791	8.23478	7.94141	7.59412	8.05792	8.30117	8.38313	8.53531
ENSRNOG00000000236	12.1169	11.987	12.0969	11.9216	12.0632	12.0915	12.1807	12.174	12.3027	12.1034	12.1183	12.0596	12.0252	12.2033	12.0306	12.1368	12.1024
ENSRNOG00000000239	8.35744	6.25654	6.61866	6.69407	6.91796	7.09695	6.16154	5.84042	6.50195	6.53243	7.0148	6.863	6.40666	6.77159	6.64716	7.49959	6.3899
ENSRNOG00000000244	9.91296	9.67202	9.91888	9.97589	9.95086	10.0577	10.1116	10.0917	9.84489	9.91169	9.84759	9.90982	9.72204	9.95133	10.0268	10.1122	9.85194
ENSRNOG00000000245	10.6029	9.12941	9.62791	9.65422	10.0819	10.1701	9.46397	9.44338	9.68853	9.76299	9.93329	9.81077	9.4424	9.38438	10.2037	10.7495	9.12999
ENSRNOG00000000246	12.3699	12.5101	12.3188	12.5986	12.2075	12.2617	12.4528	12.6898	12.6085	12.6201	12.3499	12.3873	12.3112	12.4315	12.4764	12.495	12.5134
ENSRNOG00000000248	12.3525	12.2614	12.2938	12.2012	12.2306	12.4291	12.302	12.254	12.2511	12.3116	12.4849	12.2819	12.2933	12.2507	12.2249	12.3791	12.37
ENSRNOG00000000249	10.0435	10.2937	10.5551	10.2126	10.6335	10.517	10.3131	10.3752	10.3457	10.2692	10.2868	10.3874	10.4197	10.4953	10.3158	10.4619	10.0778
ENSRNOG00000000250	10.5749	10.23	10.1828	10.1561	10.335	10.1869	10.195	10.0241	10.2493	10.0965	10.1508	10.2289	9.91622	10.3185	10.1597	10.3974	10.2981
ENSRNOG00000000257	10.7509	11.4237	11.1025	11.0118	11.1055	11.2883	11.9395	11.9498	11.6797	11.7375	11.7554	11.2325	11.3482	11.5526	11.5088	11.4252	11.2025
ENSRNOG00000000258	11.4561	11.3746	11.4715	11.5111	11.5165	11.5718	11.6485	11.6141	11.5903	11.1775	11.5887	11.477	11.2921	11.5642	11.5348	11.6464	11.457
ENSRNOG00000000264	11.3117	11.2668	11.2408	11.4231	10.8928	11.1333	11.2566	11.3857	11.4355	11.3105	11.4011	11.2206	11.1455	11.297	11.2742	11.316	11.3228
ENSRNOG00000000274	14.5533	14.4428	14.5925	14.6645	14.3958	14.3011	14.4561	14.3229	14.1849	14.3531	14.2772	14.4713	14.3814	14.3976	14.5132	14.1661	14.6422
ENSRNOG00000000283	11.4508	11.3213	11.375	11.3578	11.3152	11.368	11.5957	11.7397	11.6777	11.6505	11.5937	11.4039	11.4217	11.4987	11.5263	11.5245	11.4492
ENSRNOG00000000303	9.27588	9.0959	9.30171	9.37499	8.7914	9.21456	9.07439	9.12722	8.99929	9.06027	9.16467	9.14329	8.81448	9.00286	9.41787	9.25589	9.18699
ENSRNOG00000000304	12.8136	12.4661	12.6587	12.3271	12.7975	12.6682	12.6965	12.7217	12.6989	13.0575	12.8455	12.6569	12.8835	12.6411	12.6563	12.6735	12.6403
ENSRNOG00000000306	11.75	12.1199	12.1892	10.8453	12.5162	12.6618	12.4334	12.4344	12.4752	12.3911	12.3314	12.0655	12.1196	12.2718	12.1159	12.2685	12.1228
ENSRNOG00000000312	13.0265	12.8671	13.0583	13.2276	12.9166	12.9231	12.9428	13.0407	13.0748	13.0467	13.0108	12.9986	13.0594	12.8903	13.0183	13.0856	12.9996
ENSRNOG00000000321	13.1915	13.6896	13.2872	13.4074	13.4609	13.2205	13.2165	13.511	13.353	13.545	13.3754	13.3948	13.4997	13.4498	13.3463	13.3172	13.3271
ENSRNOG00000000322	11.6876	11.6347	11.5713	11.4486	11.6136	11.7464	11.5526	11.473	11.686	11.4939	11.4614	11.5874	11.3719	11.471	11.7418	11.7653	11.5501
ENSRNOG00000000340	12.1929	11.8891	12.2081	12.1031	12.1024	12.19	12.1357	11.7577	11.888	11.8923	11.8311	12.1144	12.0661	12.2165	12.0612	11.9104	11.8906
ENSRNOG00000000368	10.5185	11.3432	10.8732	10.9192	10.8866	11.0713	11.4328	11.2826	11.1958	11.0145	10.9307	10.9986	10.9974	11.3078	11.0702	10.8329	10.9784
ENSRNOG00000000386	11.401	10.7942	11.317	10.6259	11.0859	10.8954	10.9684	10.8773	10.9191	11.7582	10.8575	11.0875	11.546	11.1278	10.9945	10.4311	11.153
ENSRNOG00000000392	12.2832	11.9332	12.121	11.8886	12.6421	12.5266	12.4424	12.4544	12.305	12.2645	12.2889	12.246	12.2456	12.3358	12.2377	12.5084	12.0799
ENSRNOG00000000394	12.4567	12.0695	12.0448	12.0545	12.2529	11.9064	11.5753	11.8367	11.8803	11.9793	11.9172	12.0919	12.1727	11.8591	12.0107	11.8653	12.1369
ENSRNOG00000000395	14.2668	14.343	14.4148	14.3309	14.1564	14.2006	14.193	14.4158	14.4299	14.2775	14.4674	14.2891	14.2464	14.2869	14.3559	14.3335	14.3491
ENSRNOG00000000398	11.454	11.285	11.4844	11.5784	11.4351	11.4947	11.3837	11.1285	11.1451	11.2448	10.9616	11.4097	11.3223	11.2331	11.4003	11.2631	11.4652
ENSRNOG00000000406	5.66801	4.83901	5.42882	5.29781	5.50753	5.4173	5.40539	5.08764	4.85919	5.32598	5.60561	5.3631	5.40092	5.58129	5.12721	5.38084	5.10453
ENSRNOG00000000413	7.32282	6.59269	6.87507	7.22033	6.4365	6.65423	6.03155	6.39773	7.16595	6.81835	7.55099	6.8051	7.19722	6.0557	6.89131	7.34468	6.62063
ENSRNOG00000000420	12.1884	11.9088	12.1503	12.1739	11.9885	12.0641	11.9248	11.8763	11.9557	11.7856	12.0277	12.0515	11.8696	12.0875	12.0326	12.1289	11.9299
ENSRNOG00000000421	11.5228	11.4361	11.5805	11.5108	11.57	11.5476	11.797	11.8036	11.7416	11.5674	11.8937	11.5687	11.5985	11.6262	11.7258	11.6717	11.5076
ENSRNOG00000000422	11.1523	11.1065	11.3445	11.2116	11.3579	11.519	11.3486	11.013	11.2323	11.0384	11.154	11.2481	11.2608	11.0418	11.2381	11.3605	11.239
ENSRNOG00000000428	5.04567	5.44223	5.38036	5.16792	4.8816	4.85452	4.59095	4.88415	5.16495	5.12864	4.68227	5.03905	4.69333	4.97019	4.91565	5.11288	5.42069
ENSRNOG00000000431	13.3435	13.3545	13.3606	13.4845	13.1551	13.1147	13.227	13.5267	13.4773	13.4663	13.4729	13.3177	13.2233	13.4254	13.3978	13.4814	13.2561
ENSRNOG00000000432	11.151	11.2239	11.2374	11.0239	10.9043	11.4965	10.975	11.2234	11.1725	10.9903	11.2678	11.165	10.908	11.1944	11.3455	11.3469	10.9706
ENSRNOG00000000435	12.5742	12.2793	12.477	12.2149	12.8231	12.5576	12.4554	12.5001	12.6001	12.8332	12.5156	12.4463	12.5357	12.2474	12.3072	12.8551	12.6545
ENSRNOG00000000436	7.58115	6.56314	7.49372	6.87297	7.69625	7.48803	7.36917	7.21959	7.48394	7.35575	7.76618	7.28753	7.28166	7.14804	7.46278	7.94051	6.89548
ENSRNOG00000000437	13.5023	13.6012	13.6149	13.5509	13.608	13.7247	13.7965	13.7814	13.8241	13.5993	13.7453	13.6163	13.5859	13.7593	13.5993	13.7734	13.5912
ENSRNOG00000000439	8.67742	8.69296	8.7507	8.78942	8.47256	8.70327	8.2569	8.82285	8.67784	8.64102	8.9347	8.71644	8.74073	8.65295	8.96791	8.79679	8.23934
ENSRNOG00000000440	12.3043	12.6047	12.3093	12.5814	12.5259	12.4625	12.9951	12.9015	12.8244	12.7864	12.7528	12.5235	12.6758	12.5931	12.6546	12.6477	12.5624
ENSRNOG00000000441	9.76688	9.63992	9.90154	9.60627	9.97305	9.89305	9.92452	9.68372	10.0143	9.71021	9.78348	9.83858	10.0463	9.91837	9.80186	9.71075	9.58468
ENSRNOG00000000442	7.04361	6.70332	6.98883	6.78619	6.71277	6.77875	6.98958	6.7558	6.38829	6.43452	7.20607	6.76713	6.37132	6.69187	6.82754	6.72703	7.3576
ENSRNOG00000000451	9.38763	5.91812	8.09786	6.6721	9.09287	7.56132	7.96862	7.15094	7.47164	8.24301	8.84743	7.74763	7.97966	7.59319	7.42589	8.44314	7.77131
ENSRNOG00000000454	5.41529	4.81613	5.01223	6.17935	5.08824	5.29915	5.90988	4.60966	6.14347	4.92938	4.79891	5.22935	5.37045	5.20005	4.68321	5.87912	5.28546
ENSRNOG00000000455	9.57091	9.13144	9.33791	9.3788	9.44299	9.65503	9.55239	9.29445	9.43599	9.43414	9.45144	9.39122	9.28516	9.22198	9.49673	9.79552	9.30953
ENSRNOG00000000456	10.4851	9.77842	10.1221	9.9896	10.4058	10.0755	9.78086	9.57458	9.45823	10.112	10.3272	10.0524	10.1737	9.61061	9.8303	10.1718	10.2888
ENSRNOG00000000457	10.4447	9.67239	9.64672	9.99178	9.9719	9.99691	9.99459	9.70198	10.1908	10.117	10.4791	9.91112	9.88488	9.55058	10.0402	10.7439	9.81027
ENSRNOG00000000459	9.2223	8.22165	8.38092	8.39235	8.75327	8.54537	8.30215	8.32552	8.67085	8.79132	9.391	8.58729	8.7805	8.18388	8.80537	9.19989	8.18141
ENSRNOG00000000461	13.7214	13.8048	13.8578	13.7437	13.8304	13.8414	13.8515	13.7399	13.832	13.844	13.7951	13.7962	13.8886	13.7594	13.7186	13.7716	13.8842
ENSRNOG00000000464	12.6634	12.6749	12.5625	12.7102	12.3948	12.3609	12.4475	12.8384	12.7832	12.9785	12.6766	12.5897	12.7345	12.6713	12.5345	12.5692	12.6807
ENSRNOG00000000465	12.4869	12.2445	12.4788	12.2462	12.3928	12.5684	12.4932	12.4944	12.6099	12.4588	12.5358	12.4078	12.3127	12.436	12.5036	12.6584	12.3378
ENSRNOG00000000466	12.2971	12.0343	12.1033	11.9473	12.2278	12.1939	12.1518	12.2051	12.2751	12.1467	12.1888	12.1266	12.0299	12.0496	12.2561	12.2917	12.157
ENSRNOG00000000467	12.7904	12.6138	12.5637	12.8316	12.6152	12.3626	12.86	12.7288	12.9036	13.008	12.759	12.6586	12.7471	12.808	12.5949	12.7817	12.6781
ENSRNOG00000000470	12.2455	12.5493	12.3784	12.3869	12.3626	12.213	12.9045	12.7031	12.841	13.0932	12.3101	12.4005	12.6151	12.5113	12.3427	12.3569	12.8092
ENSRNOG00000000471	9.28417	9.07683	9.4178	9.13619	9.48793	9.34436	9.37441	9.02061	9.07178	9.04798	9.13404	9.24483	8.92863	9.34163	9.18597	9.43314	9.21597
ENSRNOG00000000473	14.2371	14.2484	14.3483	14.2375	14.2219	14.2257	14.0566	14.056	14.2094	13.9067	14.2723	14.2343	14.1267	14.1671	14.2964	14.2326	14.1259
ENSRNOG00000000474	12.1289	12.0588	11.9754	12.1674	12.2381	12.0138	11.942	11.9063	11.9834	11.9617	11.7745	12.0719	12.175	11.854	12.036	11.9325	12.1057
ENSRNOG00000000476	11.7832	11.7098	11.7385	11.7586	11.7603	11.7676	11.9545	11.5935	11.8231	11.5141	11.8626	11.7376	11.561	11.8186	11.7404	11.9141	11.7148
ENSRNOG00000000477	11.588	11.3761	11.6056	11.6768	11.3296	11.2214	11.3208	11.317	11.4039	11.3364	11.5198	11.4493	11.3366	11.5141	11.3957	11.4529	11.4485
ENSRNOG00000000479	8.28331	7.1843	8.03211	7.51889	7.86097	7.79314	7.51445	7.71809	7.79109	8.00614	8.09408	7.78117	7.80763	7.92475	7.62539	8.05052	7.57904
ENSRNOG00000000480	8.60408	9.45309	8.08336	9.31609	7.87583	8.69449	9.94646	10.2045	9.7339	9.98683	9.44772	8.87564	9.31344	9.23626	9.30409	8.75314	9.257
ENSRNOG00000000481	12.3259	12.2059	12.3647	12.2511	12.4399	12.2674	12.2991	12.2813	12.3218	12.1986	12.3702	12.2965	12.3394	12.2214	12.2531	12.2979	12.3965
ENSRNOG00000000483	9.69411	11.117	9.59929	10.5887	9.38427	9.48486	11.2173	11.8398	11.3741	12.3121	10.8329	10.2631	11.0443	10.8581	10.5971	10.0601	10.5761
ENSRNOG00000000485	10.3552	10.1571	10.2279	10.3318	10.208	10.4953	10.509	10.4713	10.4639	10.5951	10.6536	10.3455	10.4995	10.3226	10.5122	10.5991	10.0611
ENSRNOG00000000486	6.15408	5.52206	6.18399	6.31284	5.76872	6.27205	5.83571	6.13487	5.64553	5.54522	5.58615	6.0152	5.55519	6.18172	6.18618	5.99691	5.67361
ENSRNOG00000000487	11.9038	10.1927	10.9701	11.528	9.65207	10.0227	8.9784	9.82104	10.1877	9.81342	10.4039	10.5161	10.3178	10.1956	9.8621	10.1069	11.2168
ENSRNOG00000000488	11.8205	11.8692	11.7543	12.1779	11.4681	11.4672	11.8675	11.9243	11.9477	11.6285	11.7154	11.7347	11.5554	11.7726	11.7273	11.6871	12.1548
ENSRNOG00000000490	13.8833	13.814	13.8596	13.8256	13.9184	13.842	13.5899	13.5404	13.6756	13.4971	13.8019	13.8235	13.7285	13.8241	13.716	13.8624	13.6623
ENSRNOG00000000499	5.43468	4.69829	5.18825	4.7492	5.65381	5.28696	5.29681	5.16248	5.43711	4.49751	4.68045	5.15485	5.05574	4.78415	5.5426	4.87703	5.26762
ENSRNOG00000000503	8.35483	8.28859	7.57424	8.65085	7.61938	7.09989	8.8422	9.99713	9.26965	9.92609	8.8023	8.14228	8.49982	8.80643	8.38651	8.35519	8.60747
ENSRNOG00000000505	13.9729	13.757	13.8962	13.7438	13.8895	13.8179	13.7262	13.5858	13.7741	13.6309	13.8406	13.8211	13.7966	13.7482	13.7673	13.7746	13.8599
ENSRNOG00000000506	8.52759	7.86279	7.75324	8.22885	7.65746	7.90337	7.99917	7.78727	8.19146	8.11776	8.47006	8.02205	7.9432	8.02879	8.29314	8.43497	7.51273
ENSRNOG00000000510	5.72544	5.89341	5.61734	5.92865	5.8823	5.41122	5.66312	5.41066	5.70317	5.57557	5.45288	5.72317	5.61669	5.81442	5.61902	5.72086	5.56841
ENSRNOG00000000511	13.2408	13.3608	13.3068	13.3931	13.2384	13.3441	13.5873	13.3883	13.2651	13.5068	13.2703	13.3279	13.2267	13.3706	13.4699	13.3615	13.3287
ENSRNOG00000000513	12.5638	12.6203	12.6261	12.2648	12.7711	12.7394	12.8801	12.6538	12.6097	12.784	12.7561	12.6181	12.6168	12.6654	12.695	12.6479	12.6535
ENSRNOG00000000515	7.68767	5.68104	5.92724	6.42228	6.19054	6.77356	6.17047	6.63203	7.15055	7.31284	6.66671	6.44084	6.38766	5.35958	7.53799	7.65919	5.96607
ENSRNOG00000000519	11.7383	11.744	11.9555	11.8119	11.8364	11.6004	11.3901	11.4241	11.5987	12.0079	11.3953	11.7685	11.9713	11.4903	11.7683	11.5856	11.6467
ENSRNOG00000000520	14.2203	14.165	14.217	14.2643	14.2549	14.1715	14.0533	14.0673	14.0561	14.0897	14.1602	14.1895	14.1806	14.2026	14.0292	14.204	14.1851
ENSRNOG00000000521	9.12566	10.7401	11.2589	10.0781	10.3499	9.69486	10.9852	8.54868	9.98006	11.8053	8.40648	10.2026	11.6549	8.35485	10.566	8.35157	11.5836
ENSRNOG00000000523	9.98443	9.67336	10.0545	9.93699	9.93159	9.96911	9.91742	10.1	10.0482	9.56904	10.0355	9.90184	9.59458	9.95751	10.0144	10.1685	9.89415
ENSRNOG00000000524	13.072	12.8194	13.1376	12.8981	13.2039	13.1909	13.3217	13.1226	13.01	13.1513	13.1845	13.0791	13.1418	13.102	13.146	13.0838	13.0186
ENSRNOG00000000529	7.13117	6.85887	6.31594	7.38428	6.08462	6.75599	6.6119	7.01127	7.07297	6.55364	7.49482	6.80623	6.79923	7.38637	6.53954	7.1594	6.30938
ENSRNOG00000000532	12.8499	12.873	13.0087	12.964	12.6665	12.8815	12.745	12.9036	12.9651	13.0534	13.0248	12.8686	12.8585	12.9012	12.8142	13.0701	12.8514
ENSRNOG00000000540	12.5571	12.7422	12.7244	12.3995	12.8333	12.8426	12.754	12.8762	12.8281	12.6357	12.8451	12.6765	12.5189	12.7084	12.7622	12.9207	12.711
ENSRNOG00000000541	13.9997	14.0338	14.136	13.9443	13.9383	14.007	13.874	13.9359	13.9366	13.9486	13.9432	13.9956	13.8292	14.0785	13.9934	14.0081	13.9671
ENSRNOG00000000543	6.52229	6.07649	5.93196	6.11811	6.59761	6.39701	6.00471	5.83534	6.21206	6.30432	6.99791	6.20814	6.44672	5.53384	6.24924	7.06443	6.02978
ENSRNOG00000000547	14.5148	14.2152	14.4831	14.6723	14.037	14.1811	14.4027	14.6299	14.4485	14.4328	14.4593	14.3561	14.0973	14.5456	14.4582	14.4853	14.4178
ENSRNOG00000000549	13.9733	13.9229	14.0519	14.0405	13.8213	13.9303	13.9809	14.1043	14.0532	14.0077	13.9428	13.955	13.8937	13.9531	14.0082	13.9524	14.0972
ENSRNOG00000000557	13.7149	13.6872	13.6605	13.7027	14.0612	14.0245	14.1616	14.0355	13.8803	13.9764	13.9553	13.8314	13.9959	13.807	13.8287	13.993	13.8183
ENSRNOG00000000559	4.76612	4.361	4.54001	4.48906	4.88495	5.17296	4.51886	5.10336	5.02376	4.51545	4.14433	4.63817	4.79733	4.48847	4.24364	4.6805	5.18089
ENSRNOG00000000562	6.44228	5.81932	5.59441	5.9953	5.35616	6.31432	5.21146	5.3037	5.61376	5.33699	5.65884	5.8522	5.34763	6.58186	5.21854	6.21001	5.21191
ENSRNOG00000000565	11.2573	10.6992	10.7142	11.0644	11.2993	10.7432	11.1673	11.426	11.0409	11.3192	11.1188	10.9981	11.1537	10.8199	11.2316	11.0915	11.0421
ENSRNOG00000000566	12.0906	10.8122	11.8433	10.7553	11.1797	11.5591	11.136	11.1114	11.5684	10.5714	11.3824	11.4514	11.219	11.8051	11.798	10.774	10.8787
ENSRNOG00000000567	12.4678	12.083	12.4319	12.0111	12.3589	12.1398	12.4735	12.5647	12.3631	13.0103	12.467	12.3439	12.7701	12.4889	12.3435	11.9693	12.383
ENSRNOG00000000568	10.5246	10.1616	10.6274	10.2575	10.5826	10.5299	10.7933	10.7213	10.5073	10.9492	10.6815	10.5179	10.8049	10.6158	10.5565	10.3757	10.4923
ENSRNOG00000000569	11.7225	11.7009	11.8248	11.5648	11.8994	11.7839	11.9189	11.311	11.3577	11.8037	11.5434	11.7486	11.7053	11.5716	11.9645	11.5747	11.6054
ENSRNOG00000000571	15.2148	14.9626	14.9869	14.8721	14.9014	14.8459	14.9946	15.0407	14.9189	15.0231	15.0124	14.9708	14.7361	14.8215	15.3959	14.9167	15.0216
ENSRNOG00000000572	6.94917	5.96917	6.35801	6.16964	5.9301	5.84403	6.65586	6.8375	6.47829	7.94819	7.21063	6.30231	6.48508	6.53632	6.47931	6.67649	6.54442
ENSRNOG00000000585	13.5525	13.412	13.4733	13.4783	13.4666	13.2719	13.3161	13.4053	13.345	13.4619	13.4585	13.4402	13.3444	13.512	13.4503	13.4574	13.3567
ENSRNOG00000000588	7.74971	7.1802	7.51419	7.2328	7.57584	7.1657	7.12995	7.17903	7.52687	7.04098	8.19708	7.37601	7.35595	7.5579	7.05176	7.73679	7.32015
ENSRNOG00000000590	6.6547	7.20064	6.84322	6.91359	7.16768	6.85428	7.06343	6.62696	6.63297	6.48924	6.55683	6.89296	6.63745	6.86557	6.89952	6.73291	7.00173
ENSRNOG00000000593	11.7919	11.848	12.0175	11.7959	12.3595	12.0786	12.1048	12.3074	11.9626	12.1546	12.1487	12.0245	12.2262	12.0325	12.0699	12.0556	11.8582
ENSRNOG00000000595	9.68904	9.37666	9.37273	9.59868	9.51219	9.57477	9.66167	9.28469	9.39097	9.39203	9.29359	9.48332	9.27499	9.48716	9.46365	9.62176	9.50123
ENSRNOG00000000596	14.1091	14.1871	14.2131	14.1657	13.9924	13.9148	13.9269	14.14	14.1762	14.1741	14.2206	14.1052	14.0946	14.0901	14.1798	14.1033	14.0833
ENSRNOG00000000609	11.0686	11.2808	11.085	11.2554	11.1614	11.0009	11.3117	11.5255	11.3827	11.5694	11.2415	11.1895	11.3384	11.2248	11.2905	11.1956	11.2176
ENSRNOG00000000613	12.3876	12.1727	12.3313	12.1442	12.3543	12.4416	12.2188	12.125	12.1675	12.1509	12.0842	12.2822	12.1786	12.1381	12.3913	12.2458	12.2468
ENSRNOG00000000618	10.6858	10.4913	10.8959	10.6825	10.7477	10.6837	10.7317	10.8448	10.6433	10.5498	10.7981	10.738	10.8317	10.7673	10.8558	10.4668	10.6231
ENSRNOG00000000632	7.76991	7.41778	7.35482	7.10419	6.87395	7.2664	6.35965	6.86576	7.29791	7.65188	7.36695	7.23314	7.04298	7.45496	6.81331	7.67988	7.08044
ENSRNOG00000000638	12.7223	13.2988	12.8722	13.4148	13.0135	12.8992	13.3181	13.1824	13.0168	13.168	12.8803	13.0297	13.0298	12.9844	13.0322	13.0601	13.2259
ENSRNOG00000000640	7.94498	10.5996	7.90409	10.0585	8.0812	7.63087	10.0165	9.3793	8.77089	10.4265	8.19648	8.75871	8.20991	9.23741	9.16187	8.85444	9.39516
ENSRNOG00000000641	11.3955	11.656	11.4967	11.4644	11.3334	11.2626	11.508	11.6209	11.6968	11.6094	11.4511	11.4418	11.3297	11.6249	11.4133	11.4669	11.6282
ENSRNOG00000000653	6.00666	5.67403	6.34085	5.83334	5.70299	5.97276	5.44358	6.242	6.10259	5.93288	6.33235	5.94152	5.72358	6.21468	6.0048	6.29632	5.55913
ENSRNOG00000000658	9.13953	8.48449	8.76892	9.15096	8.68892	8.5847	8.72746	8.5558	8.81294	8.70058	8.94414	8.80554	9.01973	8.66995	8.74263	8.76135	8.71304
ENSRNOG00000000663	11.4578	11.1697	11.5077	11.1323	11.5315	11.4893	11.4524	11.3509	11.3741	11.2077	11.4777	11.3596	11.1404	11.4273	11.3807	11.5556	11.3722
ENSRNOG00000000664	10.3506	10.0118	10.1726	9.99462	10.4002	10.506	10.1785	10.0048	10.2399	9.94595	10.2271	10.2034	10.2119	10.2272	9.95563	10.3703	10.1697
ENSRNOG00000000665	12.4597	12.3718	12.4644	12.3108	12.5763	12.4834	12.5662	12.4285	12.3047	12.4639	12.3442	12.439	12.3189	12.5311	12.4347	12.4304	12.4579
ENSRNOG00000000692	8.76451	8.11063	8.5283	8.53641	8.51608	8.53641	8.39199	8.46508	8.53641	8.38395	8.64992	8.48023	8.37833	8.38278	8.56867	8.80507	8.32117
ENSRNOG00000000693	13.7246	14.1	13.8828	13.8312	14.0905	14.2244	14.2372	14.0665	14.1111	13.9135	13.9824	13.9774	13.9191	14.0648	13.9593	14.1594	13.9496
ENSRNOG00000000699	10.6368	11.2355	10.3079	11.5462	10.5037	10.4719	11.797	12.8936	12.1532	12.5085	10.8991	10.9764	11.5984	11.3545	11.1329	10.8934	11.5879
ENSRNOG00000000704	8.4466	8.21855	8.67276	9.30814	8.41314	8.59545	8.48947	9.25572	8.91882	8.75889	9.47146	8.63842	8.88291	8.47538	8.73282	9.41877	8.29277
ENSRNOG00000000715	5.07753	5.17502	5.35417	4.88911	4.70643	4.86898	5.45776	5.17176	5.04507	5.11051	5.45294	5.019	4.57016	5.93617	4.5934	4.98677	5.44863
ENSRNOG00000000716	7.5829	8.33666	7.4032	8.17673	7.35919	7.88424	7.87269	7.94816	8.11138	7.45444	7.95008	7.85812	7.62636	7.95465	8.39918	8.02108	7.14548
ENSRNOG00000000720	10.4536	10.1838	10.3221	10.2332	10.4647	10.5511	10.4635	10.3235	10.2981	10.3488	10.4519	10.3678	10.3499	10.3793	10.3721	10.5072	10.2498
ENSRNOG00000000723	9.65097	8.65818	8.87696	9.0706	9.1454	8.75342	8.78805	8.36584	9.53115	8.77193	9.198	8.95849	8.91461	8.23805	9.31822	9.61509	8.81333
ENSRNOG00000000726	4.67678	5.09057	4.68988	4.53878	4.65682	4.62151	4.86392	4.54919	4.50203	5.23587	5.20502	4.7213	4.95894	4.52621	4.73218	4.63746	5.03012
ENSRNOG00000000728	8.19543	6.92089	7.50012	7.79728	7.49045	7.56392	7.21162	7.39601	7.6093	6.98902	8.24601	7.63817	7.44962	7.83547	7.99032	8.13361	6.3419
ENSRNOG00000000729	9.96361	9.50908	10.0047	9.61225	9.9922	9.95088	9.67349	9.95922	9.99559	9.73421	9.91127	9.85567	9.83643	9.82337	10.0085	9.97966	9.58801
ENSRNOG00000000746	4.98517	5.26787	5.09757	5.11172	5.93254	5.97086	5.99804	6.07069	5.93914	5.70072	5.65399	5.39431	5.62603	4.92636	5.63067	6.14933	5.59551
ENSRNOG00000000747	5.01627	5.22093	5.05624	5.26131	5.11598	4.66008	5.26781	5.59866	5.08305	5.58309	5.45601	5.12692	5.04072	4.33653	6.43422	5.24178	4.95068
ENSRNOG00000000749	5.56084	6.0501	5.84079	5.79304	5.43109	5.64206	5.60689	5.68328	5.76338	6.13389	6.22112	5.72423	6.09987	5.84491	5.25536	5.68381	6.04119
ENSRNOG00000000759	4.7882	4.48546	5.07402	4.65982	4.41778	5.00984	4.9792	5.64297	5.20304	5.08929	5.22488	4.78033	4.54801	5.01766	5.02218	5.13897	4.97119
ENSRNOG00000000763	11.8929	11.6445	12.0308	11.2257	11.8288	11.9807	11.6745	11.6031	11.7095	11.8321	11.8085	11.7462	11.5143	11.7227	11.8756	11.8771	11.7507
ENSRNOG00000000765	6.1927	7.83878	7.12458	6.95335	6.80207	6.59676	6.50888	6.68279	6.59529	7.50962	6.6808	6.85879	7.16024	7.00298	6.05768	6.52692	7.56171
ENSRNOG00000000768	6.48735	6.04172	5.88552	5.9647	5.87003	5.97631	5.6638	5.48856	5.56006	5.63949	5.87107	5.97097	5.85765	6.04378	5.61164	5.63296	6.21599
ENSRNOG00000000774	13.5404	13.3254	13.4517	13.082	13.0909	13.1274	13.3961	13.2918	13.4282	13.4191	13.5678	13.3322	13.3865	13.4249	13.5606	12.9735	13.3421
ENSRNOG00000000775	14.1107	13.6342	14.0714	13.6182	13.714	13.6751	13.5341	13.752	13.784	14.2208	13.8097	13.8583	14.2895	13.9677	13.6436	13.3058	13.878
ENSRNOG00000000777	10.853	11.2024	10.7209	10.6608	10.7062	10.6434	10.446	10.2861	10.6992	11.2458	10.821	10.7223	10.6766	10.4775	10.5599	11.0748	10.9585
ENSRNOG00000000779	10.4318	10.2065	10.4139	10.2464	10.4415	10.5566	10.3435	10.0895	10.1711	10.1672	10.1991	10.3667	10.2606	10.3632	10.38	10.3612	10.1618
ENSRNOG00000000780	14.7075	14.6148	14.6996	14.5668	14.6197	14.6355	14.4709	14.4727	14.5799	14.5717	14.5852	14.6398	14.6459	14.5941	14.6746	14.5591	14.5199
ENSRNOG00000000781	9.18467	10.869	9.9945	10.4128	10.1457	10.1935	10.969	10.631	10.3335	10.0521	10.0518	10.095	9.62081	10.2751	10.159	10.4715	10.6656
ENSRNOG00000000782	7.28405	7.29353	7.17368	7.1226	6.8996	6.96229	6.888	6.819	7.02663	6.75478	7.14297	7.04637	6.40712	6.99518	7.27931	7.37344	7.11963
ENSRNOG00000000783	7.60274	8.12068	8.01069	8.04618	8.09988	8.34262	7.68759	7.49995	7.74759	7.92865	6.99675	8.01665	8.42806	7.83372	7.6653	7.50695	7.80929
ENSRNOG00000000785	11.0401	10.9864	11.3055	11.0164	11.3205	11.2824	11.2694	11.0294	10.9464	11.1363	11.1038	11.1467	11.1438	11.119	11.1066	11.146	11.1473
ENSRNOG00000000786	9.87669	9.64569	10.0755	9.56217	9.74129	9.80433	9.61733	9.46285	9.7175	9.40576	9.86331	9.77365	9.60243	9.86798	9.78669	9.6924	9.62367
ENSRNOG00000000795	7.91071	6.9737	7.58511	7.49853	7.49746	8.01266	7.46681	7.65613	7.4778	6.86755	7.54991	7.66472	7.36215	7.71661	8.42557	7.60911	6.48395
ENSRNOG00000000798	13.246	13.3888	13.2636	13.325	13.153	13.0454	13.0635	13.1859	13.2716	13.1124	13.3093	13.2229	13.1316	13.211	13.2415	13.2284	13.267
ENSRNOG00000000800	11.7839	11.2583	11.4701	11.8045	11.7269	11.6182	11.6993	11.6252	11.4735	11.9679	11.8334	11.6246	11.7408	11.5016	11.7176	12.029	11.2902
ENSRNOG00000000801	9.11059	8.73116	9.45996	8.98869	9.23563	9.32338	9.41368	9.73309	9.48797	9.23297	9.68778	9.1844	9.23124	9.28108	9.29785	9.43697	9.22546
ENSRNOG00000000804	12.3537	12.1274	12.4314	12.1914	12.4425	12.5419	12.4607	12.2059	12.3464	11.9303	12.3209	12.3497	12.1914	12.5013	12.3661	12.3809	12.1112
ENSRNOG00000000805	15.423	15.4157	15.379	15.4769	15.3292	15.3498	15.3488	15.4603	15.4769	15.4916	15.5557	15.4597	15.7157	15.3937	15.6546	15.2655	15.129
ENSRNOG00000000808	10.687	10.7128	10.6755	10.718	10.7076	10.8136	10.8766	10.6844	10.7684	10.6534	10.6912	10.7195	10.6065	10.763	10.7917	10.8381	10.6277
ENSRNOG00000000809	13.8073	13.6977	13.6239	13.7887	13.5446	13.4782	13.4744	13.6394	13.7755	13.7957	13.7207	13.661	13.6955	13.6438	13.6695	13.7339	13.5923
ENSRNOG00000000811	8.36229	8.64718	8.00249	9.22613	8.08655	8.7471	8.72815	8.9887	8.79427	7.70815	8.33456	8.39551	7.52222	8.12183	8.84382	9.28252	8.71715
ENSRNOG00000000812	12.8103	12.5771	12.7306	12.6253	12.6271	12.6524	12.5575	12.7693	12.8283	12.5872	12.9109	12.6462	12.6045	12.4501	12.7387	12.8148	12.8501
ENSRNOG00000000814	14.1192	14.2263	14.1634	13.994	14.3681	14.1845	14.1144	13.9418	13.928	14.1178	13.9567	14.1829	14.2446	14.1477	14.1982	13.9321	14.0329
ENSRNOG00000000815	11.7695	11.2998	11.6786	11.575	11.5131	11.6119	11.0539	11.2235	11.4268	11.5905	11.5141	11.5523	11.6537	11.4676	11.4013	11.696	11.2155
ENSRNOG00000000818	8.69158	6.80284	8.01637	7.8397	8.08535	7.95688	7.60677	7.64225	7.80374	7.56447	8.0868	7.83066	7.82447	7.28192	7.97688	8.20604	7.84779
ENSRNOG00000000825	6.92018	8.10354	7.3317	7.79595	7.15925	7.18828	8.06097	8.0306	7.59466	7.3351	8.42783	7.49981	7.63227	7.38197	7.98518	7.28949	7.79019
ENSRNOG00000000826	13.5467	13.5497	13.5199	13.5046	13.3797	13.5071	13.4659	13.4332	13.5506	13.5344	13.4627	13.4703	13.346	13.4811	13.3979	13.5994	13.6395
ENSRNOG00000000827	9.96587	8.46947	9.55944	9.19733	8.85241	8.87147	8.75111	8.57744	9.0945	9.1204	9.77224	9.13283	9.17147	9.01714	9.0909	9.29734	8.99553
ENSRNOG00000000831	11.1954	11.0896	11.3019	11.1243	11.3188	11.1709	11.3145	11.1296	11.1645	11.1635	11.2307	11.1834	11.0851	11.1384	11.2264	11.2796	11.2622
ENSRNOG00000000833	8.65637	8.94952	8.89628	8.91641	8.82477	8.89418	9.09883	9.14438	8.93288	8.7913	9.10932	8.85884	8.68031	9.01072	8.90099	9.04638	8.96258
ENSRNOG00000000838	5.98951	5.35421	5.61068	5.94116	5.79449	5.88079	5.7372	5.83202	5.76673	5.47793	5.75141	5.74865	5.82962	5.49677	5.84064	5.82791	5.70871
ENSRNOG00000000839	10.4142	10.125	10.6405	10.3767	10.259	10.2217	10.2715	9.93229	10.1216	9.84504	10.1871	10.262	9.9033	10.1134	10.304	10.2548	10.5395
ENSRNOG00000000840	14.7348	14.7568	14.8268	14.8304	14.8759	14.9576	15.1542	14.9875	15.0173	14.6746	14.9525	14.8341	14.6837	14.992	14.8493	15.0509	14.8319
ENSRNOG00000000841	13.0683	12.7739	13.1959	13.0587	13.452	13.1401	13.3975	13.1501	12.9943	13.1368	13.096	13.1238	13.3314	13	13.0938	13.0106	13.2239
ENSRNOG00000000842	12.2223	12.5576	12.2918	12.2937	12.4502	12.4445	12.4591	12.096	12.3736	12.173	12.2286	12.3466	12.3349	12.1235	12.4007	12.3311	12.4539
ENSRNOG00000000843	8.14478	8.55244	8.07696	8.26442	8.27118	8.43966	8.03535	8.13852	8.47575	8.0466	8.07121	8.30659	8.66722	8.08003	8.26267	8.01748	8.1633
ENSRNOG00000000844	6.06434	6.27334	6.1361	6.07331	6.72823	6.11592	6.21296	6.20451	5.95807	6.59669	5.90876	6.20222	6.44391	6.26333	5.72154	6.10906	6.49238
ENSRNOG00000000846	5.53429	6.74706	5.93682	5.92629	6.01438	6.08603	6.24329	5.82151	5.80075	6.24737	5.9871	6.07297	6.34863	5.9093	6.15393	5.60452	6.16536
ENSRNOG00000000847	14.741	14.5659	14.7156	14.6358	14.531	14.6663	14.5752	14.6501	14.6083	14.4743	14.5728	14.6145	14.5121	14.5379	14.6247	14.5276	14.8609
ENSRNOG00000000848	12.071	11.9312	12.1022	12.1356	11.8893	11.894	11.8353	11.7548	11.9032	11.6089	11.8596	11.9503	11.724	11.9432	11.862	11.9527	12.0823
ENSRNOG00000000850	8.22795	7.62858	8.00182	8.09374	7.62967	7.87909	7.26224	8.06899	8.09456	7.45527	8.26436	7.91505	7.76196	8.10808	7.90456	8.17824	7.43869
ENSRNOG00000000851	13.0275	13.1119	13.0946	13.0982	13.1798	13.2203	13.3337	13.1659	13.2595	13.0967	13.4138	13.1262	13.1929	13.0882	13.1229	13.3252	13.1473
ENSRNOG00000000852	13.3857	13.6989	13.4991	13.6903	13.4097	12.9825	13.6852	13.5857	13.7507	13.6702	13.8199	13.48	13.5178	13.6271	13.509	13.5264	13.579
ENSRNOG00000000853	11.3907	11.1843	11.3513	11.1588	11.4497	11.4766	11.2431	10.9286	11.0465	10.5678	10.992	11.3293	11.1006	11.3061	11.5454	11.0067	10.9545
ENSRNOG00000000854	6.25452	4.87978	5.6672	5.77194	5.45893	5.49182	4.86538	5.6809	5.94465	5.40655	5.9699	5.54825	5.93273	5.33291	5.14445	5.77373	5.70175
ENSRNOG00000000855	7.58906	8.4892	8.06585	8.11313	8.01391	7.94074	7.72278	7.80014	8.06103	7.74417	7.7973	7.97576	8.08354	7.77242	7.71401	7.84212	8.30829
ENSRNOG00000000857	4.83833	5.37895	4.95381	5.36635	4.6905	4.66423	4.97848	4.90826	4.89589	4.72128	4.97507	4.98448	4.59744	5.17515	5.19558	4.96121	4.80977
ENSRNOG00000000858	7.43899	8.03275	7.72712	7.8813	7.99843	8.04779	8.65177	8.38316	8.20849	8.36316	7.86232	7.9224	8.31828	8.05398	7.80299	7.77406	8.24224
ENSRNOG00000000860	6.13129	5.49034	6.17703	5.79712	5.39862	5.20481	5.22389	5.43178	6.02827	5.12951	4.81923	5.63496	4.64671	5.75222	6.11648	5.65207	5.54626
ENSRNOG00000000866	11.978	11.846	12.025	12.0617	12.2045	12.1275	12.3229	11.942	11.9336	11.8715	11.7487	12.0345	12.0048	12.0209	12.0419	11.9319	12.0456
ENSRNOG00000000869	10.555	11.0202	10.6824	10.6587	10.6754	10.8616	10.9777	11.353	11.0627	10.6346	11.0214	10.8244	10.7483	11.0917	11.1262	10.6948	10.6346
ENSRNOG00000000871	5.90582	6.60018	6.36422	6.08294	6.17982	5.53763	5.79913	6.11685	5.99198	6.17859	5.64498	6.14578	6.15524	6.1232	6.36296	5.35814	6.24877
ENSRNOG00000000873	7.43419	5.94758	7.25129	6.31546	5.43654	5.60968	5.43084	5.60931	6.09321	6.07245	5.74055	6.24361	5.56047	6.18084	6.45644	5.42842	6.89643
ENSRNOG00000000875	12.7742	12.4584	12.8084	12.8102	12.5014	12.5286	12.538	12.488	12.591	12.3376	12.6621	12.6322	12.7018	12.5558	12.5512	12.3828	12.787
ENSRNOG00000000878	11.0676	8.3901	10.5997	8.1805	10.5305	10.7907	9.2158	9.52893	10.4439	10.0046	11.2432	10.0907	10.2585	9.99812	11.0006	10.973	7.8224
ENSRNOG00000000886	13.1162	14.2322	13.574	14.2254	13.7493	13.695	13.9951	13.986	13.784	13.3419	13.6702	13.759	13.7012	13.6849	13.8531	13.7205	13.8436
ENSRNOG00000000888	14.1424	13.9484	14.026	14.0331	13.9032	13.8044	13.7486	13.968	13.9499	14.136	13.9904	13.9858	14.0599	14.0095	13.9458	13.8913	13.9451
ENSRNOG00000000893	14.0671	13.7954	13.9752	13.8764	13.8014	13.8249	13.4382	13.6097	13.8367	13.7869	13.8682	13.8443	13.6653	13.7387	13.8546	14.1149	13.6852
ENSRNOG00000000897	7.55497	5.51949	6.52125	6.03275	6.21985	5.86149	5.60621	5.98358	6.32393	5.8645	6.28794	6.29064	6.39266	5.84235	6.67098	5.60367	6.37511
ENSRNOG00000000900	12.1066	11.996	12.1727	12.0098	12.0642	12.0942	12.0082	12.2528	12.2291	12.1744	12.299	12.0967	12.2591	12.1081	12.0598	12.0875	12.1063
ENSRNOG00000000901	12.47	12.5007	12.4877	12.7259	12.2948	12.2468	12.0767	12.2647	12.3354	12.1303	12.343	12.417	12.3414	12.3572	12.3285	12.3512	12.4223
ENSRNOG00000000902	14.58	14.5939	14.6249	14.6477	14.4307	14.5773	14.6049	14.5502	14.5837	14.5709	14.5508	14.5978	14.5233	14.6102	14.7923	14.5509	14.4079
ENSRNOG00000000903	10.9001	10.7614	11.023	10.9577	10.8905	10.7024	10.725	10.6574	10.7343	10.5204	10.7648	10.8515	10.6725	10.8955	10.8608	10.7834	10.7535
ENSRNOG00000000907	10.3696	10.2762	10.258	10.1165	10.2743	10.3163	10.1513	10.0768	10.3884	9.68424	10.0709	10.2584	10.2455	10.0955	10.374	9.91554	10.3176
ENSRNOG00000000913	9.76996	8.82379	9.30395	9.1533	9.48566	9.56825	9.21497	9.20864	9.37682	9.31681	9.49234	9.36624	9.44803	9.26677	9.47641	9.60585	8.90847
ENSRNOG00000000920	10.2272	10.8044	10.9469	10.4853	10.1203	10.6322	10.3454	10.6659	10.6492	10.1414	10.8107	10.588	10.6921	10.5973	10.7863	10.0506	10.5581
ENSRNOG00000000921	14.6177	14.5666	14.63	14.3786	14.5109	14.6887	14.6405	14.709	14.6157	14.7273	14.7659	14.6014	14.5987	14.4597	14.9613	14.5885	14.4929
ENSRNOG00000000922	11.6624	10.7533	11.0982	11.2085	11.2546	10.9299	10.6315	10.7568	11.058	11.0225	11.1319	11.0972	10.8277	10.8926	11.2479	11.6136	10.6796
ENSRNOG00000000923	13.2982	13.391	13.4579	13.2957	13.2501	12.9884	13.4346	13.4141	13.5392	13.5256	13.415	13.302	13.3112	13.3197	13.4059	13.2196	13.5287
ENSRNOG00000000924	9.82333	10.5229	9.91818	10.1876	9.69276	10.1059	10.6188	10.9432	10.7808	10.8837	10.5325	10.2062	10.7362	10.4834	10.3851	9.92563	10.1972
ENSRNOG00000000925	11.2664	11.2164	11.2296	10.9643	11.3189	11.5422	11.1318	11.2227	11.1921	11.1059	11.1493	11.2628	11.2303	11.2878	11.309	11.2116	11.0547
ENSRNOG00000000931	11.8593	11.8816	12.0722	11.9941	12.1364	12.0586	11.9877	11.8553	11.667	12.0037	11.9636	11.9936	12.061	12.0059	11.8734	11.9681	11.8796
ENSRNOG00000000936	10.7756	10.4632	10.8749	10.6672	11.1468	10.7164	10.704	10.6756	10.4759	10.7101	10.5598	10.7634	10.678	10.7778	10.7709	10.7957	10.5434
ENSRNOG00000000937	11.4425	10.5341	11.0693	10.855	10.9305	11.0839	10.5555	10.8045	10.8194	10.9435	11.0114	10.9353	10.9855	10.5808	10.9364	11.0125	11.0658
ENSRNOG00000000938	14.0794	13.872	14.0719	14.0552	14.0033	13.9218	14.0811	14.1497	14.0411	13.96	14.1568	14.0112	13.9641	14.1024	14.0307	14.0218	14.0447
ENSRNOG00000000940	11.9952	12.1517	11.9166	12.1504	12.1633	11.8236	12.139	12.0914	12.1452	12.0913	12.032	12.0424	12.1344	11.9138	12.1328	12.0085	12.1159
ENSRNOG00000000954	13.3201	13.2167	13.4655	13.2249	13.36	13.107	13.1827	13.3652	13.5129	13.2116	13.3364	13.2885	13.2474	13.3332	13.3214	13.2996	13.2926
ENSRNOG00000000956	8.80985	8.37136	9.29536	8.51379	8.86246	9.14725	8.54608	8.51658	8.72227	8.67322	8.64475	8.86768	8.63239	8.90838	9.26824	9.03723	7.91554
ENSRNOG00000000957	13.7981	13.9241	13.7484	13.6535	13.8593	13.9185	13.8367	13.6807	13.6367	13.6684	13.7737	13.8138	13.7495	13.851	13.8217	13.6869	13.7784
ENSRNOG00000000962	10.4105	10.2159	10.0892	10.1198	10.3	10.4458	10.4585	10.438	10.348	10.3656	10.2392	10.268	10.137	10.3145	10.3792	10.4163	10.2859
ENSRNOG00000000967	11.7899	11.938	11.8924	11.9464	11.7384	11.816	12.035	11.9422	12.0547	11.9806	11.9672	11.8618	11.8142	11.9852	11.8359	11.9935	11.9285
ENSRNOG00000000969	4.59624	4.54312	4.88735	4.73292	4.88863	4.49544	4.42611	4.62867	4.59879	4.63339	4.75059	4.69841	4.94909	4.71481	4.47807	4.55753	4.59204
ENSRNOG00000000979	10.403	10.6349	10.39	10.4079	10.6075	10.6415	10.9699	10.5586	10.5823	10.6433	10.5175	10.522	10.3944	10.5647	10.6546	10.672	10.5702
ENSRNOG00000000981	12.4149	12.4613	12.3425	12.6065	12.4627	12.2997	12.4402	12.3392	12.426	12.5754	12.4718	12.4402	12.607	12.4008	12.3666	12.475	12.3506
ENSRNOG00000000983	11.1301	11.2515	11.3119	11.1591	11.2	11.1827	11.2266	11.0283	11.1846	11.0992	11.0918	11.1721	11.0032	11.1356	11.1751	11.2367	11.299
ENSRNOG00000000985	12.502	12.6454	12.4251	12.4258	12.6779	12.5653	12.5627	12.3436	12.5605	12.3994	12.5085	12.5688	12.7071	12.5629	12.6073	12.4113	12.2991
ENSRNOG00000000988	11.1873	10.7961	11.2541	10.9393	11.2272	11.1292	11.1736	11.0755	11.0335	11.0783	11.1409	11.0882	11.0056	11.1099	11.1454	11.1641	11.0418
ENSRNOG00000000989	12.9195	13.1037	12.9368	12.8811	13.0491	13.0575	13.0452	12.9419	12.9364	12.9291	12.9617	13.0023	12.9041	13.1511	13.0178	13.0069	12.8263
ENSRNOG00000000990	13.66	13.8248	13.7937	13.778	13.6363	13.7844	13.7894	13.7011	13.8161	13.5954	13.7546	13.7655	13.7256	13.8173	13.8691	13.6919	13.609
ENSRNOG00000000991	10.9043	10.3467	10.7125	10.4714	10.804	10.6778	10.4217	10.2763	10.425	10.5324	10.6478	10.6073	10.4927	10.5025	10.5541	10.8207	10.4823
ENSRNOG00000000994	9.97147	8.96633	9.08019	9.91625	9.36057	9.15662	8.92123	8.62928	9.09394	9.01339	9.23085	9.26688	8.83761	8.69654	9.41635	10.1047	9.04097
ENSRNOG00000000996	13.5884	13.4075	13.5339	13.1927	13.8064	13.7867	13.8928	13.5631	13.602	13.6349	13.6804	13.5864	13.5763	13.6193	13.7666	13.6858	13.3793
ENSRNOG00000001001	4.51462	4.52063	4.56787	4.64272	4.70769	4.60168	4.72457	4.84307	5.07388	4.72272	4.36383	4.61025	4.99691	4.38125	4.55884	4.4464	4.89607
ENSRNOG00000001005	5.73247	5.38585	5.69843	6.0072	5.87382	5.62803	5.68026	5.68295	5.48012	5.54088	5.55028	5.62067	5.07325	5.76572	5.4213	6.35123	5.66503
ENSRNOG00000001006	11.46	10.6226	11.3813	10.4665	10.9401	11.0624	10.977	11.1318	11.202	10.9789	10.9854	10.9915	10.4861	11.3438	11.1608	11.0626	11.0248
ENSRNOG00000001007	11.0493	7.18111	8.49443	8.83062	8.85427	8.40532	7.3177	7.90395	8.67377	8.38465	9.15753	8.64516	7.9772	7.65985	9.35428	10.086	7.81089
ENSRNOG00000001009	13.7977	13.3968	13.7567	13.3752	13.7569	13.6995	13.472	13.3374	13.5582	13.6217	13.6858	13.5973	13.5558	13.5061	13.5314	13.7973	13.5509
ENSRNOG00000001010	11.6526	12.0199	11.9272	11.784	11.9656	11.881	12.3823	12.6074	12.3832	12.117	12.2479	11.93	11.808	12.0728	12.2588	12.1555	12.0501
ENSRNOG00000001031	5.78293	6.65707	6.47796	6.72678	5.92376	6.15662	6.84305	5.53167	6.21209	6.19311	4.28784	6.30704	6.17095	6.41082	6.4565	5.13492	6.32819
ENSRNOG00000001032	11.9887	11.794	11.8541	11.9191	12.0478	11.9737	12.024	11.895	11.7856	11.7914	11.7471	11.9045	11.678	11.9558	11.9296	12.0202	11.8872
ENSRNOG00000001033	10.7025	10.8742	10.8698	10.7964	10.5681	10.8331	10.875	10.8432	10.7451	10.6218	10.8913	10.7756	10.4606	10.9601	10.9155	10.8572	10.7202
ENSRNOG00000001035	10.0232	9.96598	10.2056	10.0189	10.2678	10.3874	10.299	10.2142	10.1859	10.0903	10.1563	10.1526	10.1363	10.2006	10.1673	10.3055	10.0077
ENSRNOG00000001036	13.3935	12.1161	12.9546	11.843	13.4081	13.3336	12.5418	12.5376	13.0255	13.0317	12.9383	12.8151	12.8186	12.5792	12.8895	13.4381	12.4132
ENSRNOG00000001037	11.7365	11.6508	11.9119	11.7154	11.8886	11.9157	11.6498	11.4647	11.6584	11.7012	11.4528	11.7879	11.8788	11.6303	11.7629	11.6701	11.6289
ENSRNOG00000001039	11.5756	11.2313	11.4811	11.3748	11.3698	11.4995	11.5577	11.3341	11.2863	11.3319	11.2427	11.4127	11.22	11.4056	11.5568	11.3362	11.443
ENSRNOG00000001044	12.7789	12.8999	12.9146	12.7572	12.6384	12.7893	12.6964	12.843	12.8808	12.6922	12.875	12.7894	12.5659	12.9121	12.8484	12.8766	12.777
ENSRNOG00000001047	12.9202	12.6604	12.7601	12.7601	12.5415	12.6429	12.8832	12.9321	12.9004	13.231	12.9197	12.7559	12.9186	12.8065	12.7929	12.7188	12.8774
ENSRNOG00000001048	6.62081	7.0849	6.44704	6.94419	6.88921	6.76913	6.40805	6.50211	6.30677	7.03835	6.94833	6.72556	6.69156	6.53517	6.54799	7.31109	6.53307
ENSRNOG00000001049	14.8422	14.7416	14.7896	14.7087	14.9308	14.825	14.8271	14.7465	14.6278	14.7724	14.7087	14.8194	14.8769	14.8843	14.7754	14.6162	14.7471
ENSRNOG00000001050	12.1355	12.1044	12.3427	12.219	12.2299	12.2775	12.3183	12.4184	12.3836	12.2888	12.3471	12.2556	12.2931	12.3108	12.387	12.329	12.0595
ENSRNOG00000001052	10.849	10.2042	10.304	10.4406	10.4986	10.6402	10.4482	10.3772	10.7849	10.7722	10.616	10.4808	10.384	10.3576	10.6492	11.1868	10.0849
ENSRNOG00000001053	14.3949	14.1489	14.3636	14.3479	14.2579	14.2877	14.1509	14.12	14.1697	14.3282	14.2985	14.2882	14.3153	14.2728	14.2044	14.3426	14.1851
ENSRNOG00000001056	13.0605	13.0315	13.017	13.1617	12.9044	12.9782	12.964	12.9536	12.9915	13.0146	12.7787	13.0263	13.0301	13.0359	13.0173	12.8673	13.0074
ENSRNOG00000001058	11.2999	11.1118	11.232	11.453	11.3227	11.3994	11.4279	11.2499	11.1786	11.0635	11.1961	11.2885	11.158	11.3135	11.306	11.3967	11.1728
ENSRNOG00000001060	12.4726	12.2401	12.4187	12.1723	12.2447	12.3128	12.3211	11.9522	12.153	12.2149	12.1805	12.3061	12.162	12.3428	12.3892	12.1655	12.1973
ENSRNOG00000001061	12.2582	11.9582	12.1721	11.9732	12.2367	12.2493	12.0381	11.9899	12.2845	11.8628	12.2308	12.114	11.9846	12.1353	12.0583	12.3968	11.9949
ENSRNOG00000001065	11.4989	11.6007	11.6485	11.4503	11.7767	11.8253	11.695	11.6417	11.6173	11.6907	11.7279	11.6262	11.6331	11.68	11.5218	11.8364	11.5737
ENSRNOG00000001068	14.5343	14.458	14.5585	14.5442	14.717	14.6073	14.7267	14.5447	14.5094	14.6251	14.4646	14.55	14.6269	14.3436	14.5602	14.5447	14.7705
ENSRNOG00000001080	12.3964	12.2296	12.4055	12.3115	12.3135	12.0565	12.1962	12.1868	12.3137	11.9582	12.2864	12.2943	12.1631	12.3492	12.4233	12.1326	12.1702
ENSRNOG00000001082	10.3567	10.1836	10.2472	10.32	10.1315	10.2368	10.4832	10.4816	10.4241	10.2641	10.5481	10.2316	9.97763	10.3605	10.27	10.5688	10.4327
ENSRNOG00000001083	13.0194	12.7205	12.7938	13.0551	12.7633	12.6255	12.4281	12.729	12.5833	12.7458	12.7637	12.7869	12.5876	12.6834	12.8338	12.9729	12.6855
ENSRNOG00000001088	11.0089	10.7598	11.1991	11.1124	11.0852	10.9631	11.1161	10.5602	10.7643	10.6968	10.8729	10.998	10.9949	10.8289	11.0299	10.8435	10.9572
ENSRNOG00000001092	13.641	6.38673	10.8083	8.28937	9.80609	8.89246	6.33383	7.776	9.49702	9.84017	12.0512	9.50746	9.7058	6.71997	11.3174	11.1446	8.14556
ENSRNOG00000001108	12.3539	11.8608	12.1721	12.0493	12.2888	12.4072	12.2746	12.0819	12.1127	12.2721	12.1037	12.1854	12.2432	12.1007	12.1926	12.2739	12.0917
ENSRNOG00000001111	10.2147	10.074	10.3501	10.3876	10.3576	10.0626	10.0482	10.1283	10.1056	9.90703	10.0524	10.2027	9.98301	10.2163	10.1782	10.2957	10.1237
ENSRNOG00000001113	14.3306	14.4011	14.2881	14.3489	14.4103	14.3904	14.3512	14.174	14.2317	14.1544	14.1986	14.335	14.2034	14.2899	14.3524	14.3532	14.3138
ENSRNOG00000001114	11.4561	11.6093	11.5667	11.4114	11.6356	11.7488	12.114	12.0063	11.7995	12.4189	11.957	11.6229	12.1057	11.6405	11.4317	11.6253	12.06
ENSRNOG00000001130	6.66804	6.77669	6.80057	7.07695	6.5136	6.78759	7.30267	8.06234	7.43896	6.77371	7.43018	6.8881	6.86529	7.44171	7.06252	6.85842	6.95744
ENSRNOG00000001135	14.2181	14.4521	14.2911	14.336	14.3984	14.3973	14.4508	14.3482	14.3231	14.1775	14.4139	14.3491	14.2165	14.3874	14.445	14.4467	14.2364
ENSRNOG00000001136	14.4508	14.4298	14.3137	14.1632	14.3689	14.4688	14.5681	14.3852	14.4965	14.2231	14.5147	14.3756	14.287	14.4025	14.4959	14.3453	14.4478
ENSRNOG00000001138	13.5484	13.6466	13.6874	13.5747	13.6199	13.5372	13.474	13.441	13.5651	13.4358	13.6675	13.6028	13.5424	13.6561	13.6122	13.6197	13.4103
ENSRNOG00000001142	11.9187	11.3437	11.7299	11.808	11.6114	11.6209	11.567	11.4067	11.4807	11.6267	11.6573	11.672	11.7454	11.6353	11.6353	11.62	11.4756
ENSRNOG00000001143	12.4622	11.839	11.6194	12.6648	10.7471	10.5936	11.0272	11.5818	11.5151	11.9436	11.3405	11.6021	11.6191	11.3926	11.4809	10.8928	12.5097
ENSRNOG00000001148	14.0144	14.0577	14.1796	13.933	14.0019	14.0821	14.0519	14.2114	14.2612	14.2359	14.4002	14.0738	14.1248	14.0266	14.2442	14.2474	13.973
ENSRNOG00000001149	11.0555	11.1516	10.833	11.1261	11.1506	11.02	11.3037	11.2412	11.3247	11.378	11.5206	11.0923	11.2888	11.1324	11.0725	11.4262	10.9775
ENSRNOG00000001152	7.14448	6.61954	7.01328	7.14677	6.74905	6.37998	6.89696	7.09526	6.67015	6.2175	7.78262	6.85705	6.46516	7.18256	7.01263	6.93749	6.80263
ENSRNOG00000001153	10.0179	9.98669	10.0634	9.9466	9.69399	9.24277	9.17336	9.53031	9.67432	9.93207	9.44098	9.76731	9.61466	9.66152	9.67827	9.54203	10.0449
ENSRNOG00000001156	11.2039	12.0249	10.6389	11.8935	10.4614	10.6551	11.6967	11.8315	11.9191	12.3182	11.5971	11.2454	11.703	11.4346	11.1928	11.1435	11.7694
ENSRNOG00000001158	12.2371	12.1674	12.2606	12.1848	12.0644	12.0191	12.1944	12.2153	12.386	12.4577	12.3199	12.1891	12.3137	12.2772	12.1774	12.1911	12.1567
ENSRNOG00000001159	5.95577	4.4575	5.21566	5.24679	5.7291	5.46791	5.68408	5.4983	5.4984	5.13734	4.53479	5.45905	5.50878	5.95107	5.59883	4.91891	4.6681
ENSRNOG00000001162	6.26475	6.79056	6.44378	6.63474	6.80256	6.1757	6.35799	6.56148	6.36756	6.75137	6.36086	6.4095	6.41735	6.275	5.88104	6.6347	7.24215
ENSRNOG00000001163	11.9309	11.2544	11.5722	11.4089	11.746	11.5539	11.354	11.1408	11.4279	11.4009	11.5287	11.5559	11.5458	11.3683	11.6226	11.6154	11.3089
ENSRNOG00000001164	5.33448	5.56515	5.93092	5.23837	5.86001	6.36476	6.00323	5.77389	6.00394	5.68259	5.24769	5.73806	5.78437	5.78267	5.78185	5.70621	5.58975
ENSRNOG00000001169	11.2439	10.1311	10.7301	10.8362	10.7142	10.6528	10.4155	10.4583	10.587	10.4689	10.6485	10.6696	10.5195	10.546	10.6528	10.9013	10.5368
ENSRNOG00000001170	14.9395	14.8291	14.8788	14.8794	14.7801	14.7335	14.7113	14.888	14.9046	14.8818	15.0169	14.8741	14.9062	14.972	14.9488	14.8626	14.6122
ENSRNOG00000001171	10.7653	10.3596	10.6022	10.6555	10.5128	10.6089	10.6371	10.7437	10.6089	10.4923	10.6567	10.5824	10.3516	10.5621	10.8238	10.7592	10.51
ENSRNOG00000001172	13.7482	13.8016	13.7869	13.5902	13.9403	13.9051	13.9382	13.8158	13.8603	13.7599	13.9495	13.8189	13.8142	13.8454	13.9382	13.8802	13.6516
ENSRNOG00000001173	12.7073	13.3595	13.1568	13.107	13.1378	13.1901	12.9908	13.202	13.1875	12.7315	12.9484	13.0935	12.8562	13.0553	13.2716	13.1961	12.9644
ENSRNOG00000001174	11.5678	11.6642	11.3718	12.082	11.5766	11.7312	11.758	11.7055	11.7287	11.0271	11.6432	11.6141	11.5845	11.413	11.5353	11.7074	11.8707
ENSRNOG00000001177	7.87993	7.22541	7.35632	7.2089	7.24371	7.77695	7.62917	7.38882	7.42833	7.61312	7.87856	7.47847	7.29105	7.78497	7.53902	7.79822	7.12552
ENSRNOG00000001182	12.3824	12.2334	12.3386	12.3964	12.4653	12.7209	12.7923	12.4805	12.5091	12.398	12.4024	12.4439	12.4842	12.4747	12.4992	12.5378	12.3182
ENSRNOG00000001183	7.40841	7.72635	7.42367	8.24112	7.6829	7.55209	7.68359	7.49711	7.41559	7.4492	6.61004	7.61921	7.72761	7.39469	7.41609	7.19499	7.91419
ENSRNOG00000001184	8.53923	8.46205	8.52264	8.54265	8.63043	8.56014	8.91962	8.93116	8.57635	8.81569	8.80755	8.59828	8.59036	8.88114	8.65584	8.65876	8.49587
ENSRNOG00000001185	12.9854	13.1657	13.0989	13.0637	12.9754	13.1307	13.0941	13.1934	13.2007	12.9053	13.1794	13.0578	12.9148	13.1345	13.0514	13.1665	13.1646
ENSRNOG00000001187	6.14464	5.56827	5.72825	6.51957	5.6688	5.72395	6.06189	5.64749	5.42229	6.19168	6.4797	5.87388	5.67669	5.34956	6.48521	6.61624	5.45924
ENSRNOG00000001189	10.1059	10.9121	9.35061	10.4521	9.42975	9.27714	9.59442	10.1685	10.2432	9.43619	9.87125	9.94791	9.6639	10.1794	10.1602	9.48837	10.0134
ENSRNOG00000001190	12.5507	12.4955	12.6823	12.3977	12.7428	12.6382	12.4939	12.4866	12.5027	12.8495	12.5475	12.5709	12.6686	12.5888	12.3738	12.6832	12.5832
ENSRNOG00000001195	9.57603	5.66415	6.85874	7.06609	6.98463	6.77298	5.58522	5.60294	6.94101	7.08151	8.19142	7.04679	6.29898	5.67321	8.52626	9.02749	5.23202
ENSRNOG00000001201	12.0804	11.7124	12.1003	11.7777	11.7337	11.7317	11.6074	11.6996	11.8721	11.8081	12.1521	11.8596	11.8278	11.9081	11.8644	11.8813	11.7444
ENSRNOG00000001203	12.4456	12.3392	12.4947	12.296	12.5036	12.5307	12.475	12.3037	12.3871	12.2749	12.3092	12.4002	12.3063	12.3626	12.3234	12.4114	12.5803
ENSRNOG00000001204	12.0726	11.972	12.0315	11.6696	12.0433	11.9419	12.0251	12.1071	11.9877	12.4349	11.8925	11.991	12.1329	11.9991	12.0564	11.7621	12.1153
ENSRNOG00000001211	12.5665	12.3188	12.5819	12.4973	12.4532	12.5054	12.4965	12.4985	12.4546	12.2878	12.4629	12.4643	12.2983	12.4122	12.545	12.4993	12.5732
ENSRNOG00000001212	5.34813	5.49014	5.57083	5.81887	5.88975	5.56788	6.05732	5.29249	5.419	5.84954	5.54469	5.62639	5.56727	5.78155	5.60307	6.03355	5.12985
ENSRNOG00000001214	13.6787	14.2265	13.9703	14.0051	13.9055	14.0867	14.2878	14.1108	14.3145	13.82	14.1477	13.9869	13.8204	14.0866	14.1024	14.2325	13.9718
ENSRNOG00000001215	11.7123	11.5441	11.7135	11.6078	11.5498	11.5822	11.6192	11.7441	11.7969	11.4058	11.8113	11.6215	11.402	11.7766	11.7054	11.7655	11.5581
ENSRNOG00000001216	10.4416	10.5024	10.4565	10.6773	10.3241	10.0617	10.4742	10.4478	10.4032	10.3056	10.2701	10.3651	10.1064	10.2456	10.4706	10.3358	10.8065
ENSRNOG00000001217	7.33149	5.80535	6.45773	6.67992	5.84215	5.99286	5.77993	6.03053	6.21271	5.32735	6.61881	6.29401	5.84701	6.05616	6.6334	6.11287	6.3585
ENSRNOG00000001223	11.7124	11.5132	11.6303	11.5909	11.7238	11.6569	11.4918	11.2956	11.6138	11.4105	11.5989	11.6075	11.5549	11.5229	11.5622	11.7877	11.4321
ENSRNOG00000001225	10.5846	10.5602	10.518	10.1648	10.4875	10.3408	10.3555	10.1476	10.4369	10.3839	10.1774	10.4169	10.2119	10.488	10.3963	10.2834	10.5334
ENSRNOG00000001227	13.4114	12.7324	13.1331	12.6859	12.9877	12.984	12.8911	12.81	12.8914	13.0079	12.808	12.9966	12.9623	12.9841	13.0883	12.664	13.0363
ENSRNOG00000001232	11.8396	10.6111	10.8994	11.0501	11.1231	11.1933	10.836	10.7439	11.4075	10.9694	11.5555	11.1196	10.9648	10.925	11.4704	11.8904	10.3127
ENSRNOG00000001235	13.2867	12.9845	13.2537	12.8735	13.286	13.1316	13.1892	13.0853	12.9975	13.5747	13.0422	13.1646	13.3311	13.1563	13.1779	12.9583	13.1571
ENSRNOG00000001237	12.1955	12.4895	12.2788	12.4556	12.3493	11.9517	12.5483	13.025	12.8593	12.805	12.7957	12.3625	12.5172	12.528	12.4968	12.543	12.434
ENSRNOG00000001238	12.9691	12.7536	12.98	12.8782	13.0711	13.0817	13.046	12.7817	12.7699	12.7214	12.7515	12.9249	12.7624	12.911	12.9172	12.9597	12.9264
ENSRNOG00000001239	13.3758	13.4233	13.3801	13.1728	13.2825	12.9294	13.2089	12.9787	13.2312	13.3749	13.1424	13.2287	13.1822	13.0329	13.279	13.0425	13.6006
ENSRNOG00000001245	13.7093	13.4753	13.6759	13.6007	13.655	13.8405	13.8556	13.9863	14.02	13.7667	14.1359	13.6695	13.605	13.7105	13.7532	14.1931	13.6284
ENSRNOG00000001247	13.0613	13.1611	13.1601	13.1858	13.044	13.0982	12.9595	13.2423	13.1576	13.1593	13.2397	13.1294	13.0218	13.2183	13.2141	13.327	12.884
ENSRNOG00000001250	11.3334	11.589	11.4723	11.5527	11.3526	11.4254	11.504	11.3312	11.3591	10.7897	11.6407	11.4202	11.3144	11.2184	11.5236	11.2338	11.7019
ENSRNOG00000001251	10.5347	9.44157	9.80304	9.99528	9.59363	9.51448	9.57531	9.42838	9.40727	8.63852	10.0007	9.79181	9.44455	9.53769	10.2613	9.24894	9.75575
ENSRNOG00000001252	10.0665	10.0074	10.158	9.92811	10.1698	10.1411	10.5318	10.5037	10.517	10.3704	10.583	10.1411	10.2618	10.352	10.1851	10.3133	10.1632
ENSRNOG00000001253	13.4284	13.2694	13.464	13.2811	13.3663	13.2924	13.298	13.2888	13.4317	13.4441	13.4765	13.3405	13.2982	13.3987	13.2662	13.5139	13.3436
ENSRNOG00000001260	9.76151	9.31336	9.92094	9.53242	9.74913	9.64859	9.39315	9.30489	9.49695	9.54788	9.62114	9.64164	9.60779	9.58349	9.6575	9.72898	9.3232
ENSRNOG00000001261	5.96508	6.02313	6.26101	6.57629	5.84276	5.69926	5.90792	5.7447	5.39219	5.57459	5.64735	6.06572	5.657	6.97801	5.58895	5.64801	5.62117
ENSRNOG00000001269	14.3213	14.1377	14.2462	14.0663	14.2101	14.1174	14.1936	14.2048	14.2451	14.2355	14.357	14.2159	14.2811	14.2935	14.2698	14.1026	14.1166
ENSRNOG00000001275	7.1981	4.85397	6.16244	6.47715	5.35861	5.53746	4.76563	5.29539	6.43971	6.06185	5.57332	5.77509	5.20995	4.62286	6.5553	7.05874	5.50765
ENSRNOG00000001277	10.7952	10.907	10.7717	10.9847	10.4944	10.3167	10.69	10.8359	10.8405	10.9088	10.9306	10.7043	10.6099	10.8513	10.6077	10.7574	10.9864
ENSRNOG00000001278	11.9019	11.5474	11.889	11.8127	11.8276	11.9655	11.9038	11.7822	11.8096	11.8044	11.9537	11.8023	11.7354	11.8655	11.6757	12.0799	11.804
ENSRNOG00000001284	5.00617	4.71392	4.95709	5.55932	4.87939	5.02062	4.61446	4.46536	5.54523	4.47823	4.16589	4.87658	4.7636	4.63419	4.35489	5.47345	5.0621
ENSRNOG00000001287	8.27609	7.55249	7.8999	7.86261	8.03556	7.90339	7.90051	8.22953	8.30851	7.64185	8.17931	7.90464	7.49471	8.10153	8.0155	8.48247	7.76446
ENSRNOG00000001289	10.9502	10.7351	11.1103	10.8963	11.1194	11.0174	10.8216	10.6949	10.9754	10.3608	10.9993	10.9537	10.719	11.0311	11.0046	11.1588	10.531
ENSRNOG00000001294	12.7335	12.4611	12.7843	12.7967	12.4872	12.5567	12.3646	12.4043	12.6833	12.3491	12.6316	12.6544	12.6787	12.6462	12.7455	12.5867	12.2365
ENSRNOG00000001295	14.7241	14.7067	14.6754	14.7613	14.7777	14.5717	14.6406	14.4873	14.5828	14.4161	14.5322	14.6775	14.7167	14.6917	14.4718	14.4458	14.8309
ENSRNOG00000001296	9.21743	9.0439	9.19415	9.29674	9.0053	9.18273	9.56742	9.71813	9.49347	10.3035	9.13437	9.34369	10.0406	9.61311	9.4992	8.8501	8.86603
ENSRNOG00000001297	12.6831	12.5192	12.7317	12.5395	12.474	12.516	12.6208	12.5398	12.5625	12.474	12.6729	12.5892	12.447	12.7311	12.6615	12.4941	12.5532
ENSRNOG00000001299	12.4057	12.2489	12.5219	12.4928	12.4661	12.3868	12.371	12.3678	12.2811	12.3743	12.4604	12.4045	12.3498	12.4986	12.2696	12.5227	12.3527
ENSRNOG00000001300	12.3299	11.9914	12.3556	12.3234	12.4899	12.3009	12.4125	12.2804	12.2465	11.9864	12.4092	12.359	12.5126	12.4503	12.4774	12.1368	11.8888
ENSRNOG00000001302	10.0982	9.59554	10.6652	9.68601	10.0966	9.63878	9.24818	9.33157	9.83205	9.61757	9.67048	9.94674	10.102	9.68029	9.95802	9.42604	9.79373
ENSRNOG00000001303	12.2026	12.1272	12.2076	12.0261	12.1726	12.0415	12.1575	12.2099	12.1974	12.4409	12.1987	12.1522	12.2815	12.1843	12.1269	12.0638	12.2277
ENSRNOG00000001309	10.5631	11.2154	11.1159	10.9904	11.2355	11.1544	11.2458	11.2738	11.2968	11.2779	11.1444	11.0627	11.1355	11.0553	11.0984	11.3836	10.9701
ENSRNOG00000001312	10.8932	10.6698	10.7825	10.5952	10.8259	10.8778	10.7726	10.616	10.7015	10.6058	10.6942	10.7543	10.6569	10.7353	10.7518	10.7314	10.7909
ENSRNOG00000001313	12.0785	12.4255	12.2743	12.5362	12.2246	12.0971	12.5753	12.6946	12.5142	12.3878	12.4999	12.291	12.1989	12.3472	12.4366	12.454	12.461
ENSRNOG00000001314	12.6176	12.2978	12.408	12.5039	12.1549	12.2237	12.1324	12.3074	12.3379	12.0571	12.425	12.3598	12.1874	12.527	12.3181	12.2727	12.2969
ENSRNOG00000001316	14.0269	14.0885	14.1336	14.1731	13.9166	13.9306	13.8826	13.9365	14.0467	13.9555	14.0672	14.0417	14.0134	14.0603	14.0328	14.0299	13.9519
ENSRNOG00000001325	9.46065	8.84805	9.11478	9.1607	9.12452	9.05539	9.0237	8.87519	8.92022	8.89823	9.24857	9.11099	8.97224	9.22965	9.03289	9.18778	8.93603
ENSRNOG00000001331	12.9848	12.8116	12.9823	12.9664	12.8472	12.9404	12.9274	12.8701	12.8653	12.7854	12.8263	12.9213	12.9265	12.8732	12.9598	12.7502	12.9659
ENSRNOG00000001333	5.45521	5.22923	5.34733	5.42062	5.21838	5.62894	5.90277	5.56119	5.65251	5.27817	4.93055	5.47445	5.59589	5.89912	5.47532	4.8731	5.2912
ENSRNOG00000001335	11.6739	11.4151	11.7278	11.6488	11.5896	11.5729	11.7599	11.9238	11.7073	11.811	11.7188	11.6296	11.6301	11.6819	11.7259	11.6506	11.7088
ENSRNOG00000001336	9.82628	9.55826	9.55375	9.12766	9.90476	9.89019	9.48432	9.50168	9.82262	9.32962	9.80985	9.60783	9.3614	9.54181	9.70637	10.0428	9.43589
ENSRNOG00000001338	9.13989	9.17069	9.33656	9.94416	8.77925	9.20161	8.76857	8.68292	8.97591	8.17975	9.06903	9.15118	9.0182	8.94237	8.8279	9.09265	9.30893
ENSRNOG00000001339	12.3863	12.2247	12.4563	12.2238	12.3004	12.308	12.4	12.2158	12.3994	12.2279	12.4127	12.3216	12.2925	12.3904	12.3121	12.2861	12.334
ENSRNOG00000001344	13.9725	13.1077	13.6631	13.5957	13.6235	13.4256	13.2871	13.1007	13.5263	13.447	13.5957	13.5179	13.401	13.2912	13.5808	13.8821	13.2937
ENSRNOG00000001345	13.5359	13.1078	13.5793	13.1967	13.4506	13.4111	13.2807	13.0976	13.2455	13.5639	13.3703	13.3677	13.3841	13.3154	13.3285	13.4653	13.2631
ENSRNOG00000001347	10.0604	10.1629	10.3063	10.308	10.603	10.4441	10.1385	10.3227	10.0417	9.66808	10.2164	10.3181	10.1377	10.3874	10.453	10.362	9.75962
ENSRNOG00000001348	12.0198	11.9337	12.2116	11.8125	11.9574	11.8774	11.8254	12.0227	12.1449	11.8072	11.9584	11.9729	11.6796	12.1939	12.0699	12.0391	11.8298
ENSRNOG00000001349	10.841	10.3642	10.8633	10.4553	10.9409	10.8251	10.827	10.7098	10.7212	10.9409	10.8049	10.7382	10.9538	10.7042	10.6957	10.7124	10.6943
ENSRNOG00000001350	11.4285	11.3812	11.6352	11.4116	11.5856	11.6604	11.6583	11.6476	11.5656	11.6691	11.5632	11.525	11.4999	11.5888	11.5338	11.6831	11.4919
ENSRNOG00000001353	9.45745	9.69181	9.53371	9.82771	9.47125	9.52553	9.84425	9.72052	9.57314	9.77985	9.66478	9.61456	9.64239	9.70686	9.67431	9.60969	9.57149
ENSRNOG00000001355	12.8194	12.3547	12.4043	12.5995	12.7228	12.5844	12.534	12.6739	12.6667	12.7136	12.8085	12.5648	12.6217	12.3629	12.613	12.9471	12.5468
ENSRNOG00000001357	8.53423	8.34289	8.13502	8.10627	8.65197	8.83219	8.51931	8.31529	8.47667	8.33418	8.00894	8.41986	8.26456	8.30466	8.60691	8.61082	8.16775
ENSRNOG00000001360	5.78725	5.70618	6.53858	5.49785	5.88426	5.88508	6.06776	5.47884	5.94228	6.66485	6.80588	5.823	5.50501	5.75217	5.8506	7.00087	5.88867
ENSRNOG00000001367	6.77552	6.82058	6.65956	6.99708	6.76942	6.9802	7.59055	7.08902	7.10356	7.00543	6.92015	6.80035	6.69301	6.78917	6.71859	7.11853	7.44533
ENSRNOG00000001368	14.1333	13.9216	14.0619	14.1587	13.8777	14.0483	13.8928	14.0751	14.0824	14.1364	13.9859	13.9852	13.9609	13.949	13.7557	14.173	14.3022
ENSRNOG00000001369	9.06649	8.72438	8.85292	9.07045	8.69309	8.85661	8.52229	8.43302	8.57441	8.98443	9.51269	8.85081	8.9905	8.23125	9.1716	9.32519	8.50825
ENSRNOG00000001376	12.773	12.4211	12.8183	12.3503	12.8208	12.6273	12.6507	12.2669	12.4104	12.9429	12.5869	12.6488	12.8784	12.651	12.4989	12.4522	12.5761
ENSRNOG00000001379	6.77146	6.60416	7.07646	7.18496	6.2559	6.35541	6.88193	6.76963	6.94264	6.77977	6.88911	6.7026	6.48761	6.82943	6.75797	6.79665	6.95447
ENSRNOG00000001383	10.0854	10.0365	10.2813	10.2995	10.0643	9.87039	10.1683	9.89021	10.0067	10.1326	10.1307	10.1337	10.528	10.0521	9.9856	9.6432	10.2576
ENSRNOG00000001385	12.6782	12.3004	12.6436	12.2644	12.6645	12.6098	12.5854	12.676	12.8112	12.5987	12.8081	12.5512	12.5473	12.5859	12.6665	12.7739	12.4133
ENSRNOG00000001388	8.06351	8.27585	8.45247	8.32461	7.80539	7.84523	7.42788	7.93726	7.70142	7.71052	7.65574	8.06048	7.56392	8.05066	8.16271	7.82324	8.11573
ENSRNOG00000001389	7.82071	8.06521	8.24359	8.43465	8.29949	8.27676	7.98097	8.01276	8.29644	8.1743	7.53455	8.13518	8.27937	8.06812	7.72867	8.33512	8.1256
ENSRNOG00000001392	7.85059	6.8308	8.16508	7.19486	7.89197	7.41252	7.0741	6.97681	7.20457	7.0346	6.50938	7.49418	7.17893	6.94756	7.97533	7.00852	7.44426
ENSRNOG00000001396	11.9897	11.8065	11.9956	11.8157	12.0228	11.9714	11.8304	11.6165	11.8862	11.6783	11.9227	11.9113	11.7818	11.8839	11.9341	12.0656	11.6958
ENSRNOG00000001399	5.89515	5.70094	5.86837	6.08004	5.8657	5.40163	5.58586	5.70127	6.13743	5.58248	5.48029	5.77336	5.5758	5.33286	6.23972	5.96145	5.67385
ENSRNOG00000001409	14.6019	14.6548	14.6121	14.5057	14.5872	14.6339	14.695	14.597	14.5897	14.5653	14.6881	14.5887	14.5529	14.6827	14.4674	14.5601	14.7825
ENSRNOG00000001412	5.44309	5.29813	5.34975	5.71102	5.69423	5.78979	5.73769	5.54411	5.82669	5.56678	5.33218	5.49283	5.56671	5.43629	5.14643	6.03372	5.62992
ENSRNOG00000001414	7.86391	8.01538	7.79889	7.67475	8.20256	8.18689	8.04463	8.38908	8.17671	7.95623	7.22665	7.89218	7.40232	7.94548	7.93946	8.16407	8.29825
ENSRNOG00000001416	8.73859	9.0206	8.50493	9.73775	7.62371	7.95011	9.45534	10.9488	10.0552	10.2897	8.91424	8.78641	9.37221	9.67043	8.45935	8.21747	10.048
ENSRNOG00000001417	13.2045	12.827	13.1021	13.0335	13.0374	12.9594	12.8696	13.0487	13.2609	13.2601	13.2538	13.0216	13.1659	12.7613	13.103	13.305	13.0205
ENSRNOG00000001425	8.41391	7.99981	8.27245	8.18526	8.21021	8.52211	8.1284	8.45094	8.33781	7.93093	7.7989	8.17237	7.77626	8.06224	8.1091	8.37762	8.67848
ENSRNOG00000001429	10.3379	10.4514	10.6489	10.405	10.7392	10.5404	10.6356	10.3595	10.3955	10.6056	10.5325	10.4545	10.3787	10.2922	10.2964	10.7607	10.8053
ENSRNOG00000001434	5.46865	5.39466	5.6151	5.56246	5.91769	5.51094	5.52614	5.66412	5.76803	5.50994	5.44875	5.54833	5.31542	5.52198	5.62808	6.06712	5.35098
ENSRNOG00000001436	15.1323	15.1367	14.9819	15.108	15.2169	15.2111	15.2944	15.3357	15.2918	15.2675	15.3035	15.1299	15.1453	15.3965	14.8402	15.3935	15.2143
ENSRNOG00000001440	14.4917	14.4648	14.5092	14.4737	14.3995	14.3739	14.3494	14.4971	14.4803	14.3829	14.4888	14.4215	14.2957	14.3782	14.4064	14.5075	14.6297
ENSRNOG00000001441	12.0852	11.9025	12.322	11.975	12.3258	12.1381	12.0483	11.7475	11.8416	11.9375	12.0087	12.1046	11.9972	12.0709	12.1251	12.1385	11.8639
ENSRNOG00000001442	14.1362	13.7862	14.1684	13.8751	14.0497	13.9425	13.8496	13.8466	14.0035	14.0549	14.0718	13.9662	13.9218	13.834	13.9823	14.1484	14.007
ENSRNOG00000001449	12.8969	13.2063	12.9173	13.2397	12.7305	12.8403	13.2053	13.461	13.2967	13.5513	13.3957	13.0352	13.1698	13.1757	13.1404	13.202	13.0295
ENSRNOG00000001452	11.1772	11.4449	11.4703	11.114	11.4232	11.3122	11.4455	11.2653	11.4585	10.9026	11.3265	11.2812	11.2005	11.2099	11.1787	11.113	11.8028
ENSRNOG00000001454	13.5352	13.7529	13.5019	13.7348	13.4267	13.7258	13.8193	13.7648	13.7791	13.8007	13.6073	13.6507	13.7293	13.7458	13.7036	13.626	13.565
ENSRNOG00000001457	11.8549	11.8872	12.0235	11.857	12.0004	11.9663	12.0132	12.005	12.1001	11.8583	12.0148	11.9418	11.7843	12.0497	12.0526	12.157	11.7537
ENSRNOG00000001469	9.7609	9.5738	9.49771	9.80512	9.72734	9.55017	9.87447	9.64391	9.8756	10.015	9.99802	9.70207	10.0877	9.57332	9.74252	9.83553	9.51096
ENSRNOG00000001470	12.3417	12.6282	12.1485	12.6619	11.6741	11.8792	12.7088	11.6935	11.9234	12.3592	11.9309	12.2341	12.0156	12.2709	12.4865	11.727	12.4202
ENSRNOG00000001476	6.72626	8.09983	6.9613	9.39093	6.94308	6.11557	6.16167	7.09875	6.46121	5.92244	6.13851	7.10073	6.87485	6.65831	6.13646	6.52936	8.46928
ENSRNOG00000001478	12.9779	11.725	12.6697	12.6074	12.4692	12.3594	11.9282	11.9188	12.2882	12.1215	12.3905	12.4088	12.3429	12.1938	12.3336	12.6744	12.0828
ENSRNOG00000001479	13.1461	12.9585	12.9694	13.0656	12.9404	13.1217	13.059	13.2693	13.2367	13.3117	13.2198	13.0448	13.1603	12.967	13.0736	13.2343	13.1109
ENSRNOG00000001480	8.50179	7.54063	7.65342	8.3722	7.77403	7.89095	8.51324	9.34226	8.72185	9.25351	8.00259	8.06797	8.49245	8.21552	8.17079	8.12328	8.46533
ENSRNOG00000001488	13.329	13.0854	13.2324	13.1364	13.1852	13.2328	13.0147	13.0063	13.1833	12.9555	13.2683	13.1754	13.0737	13.1127	13.1913	13.3063	13.073
ENSRNOG00000001489	12.507	12.2607	12.4279	12.4392	12.4599	12.4447	12.3545	12.1887	12.2906	12.2853	12.2584	12.3868	12.2625	12.3502	12.3294	12.5036	12.3532
ENSRNOG00000001492	9.06237	9.27436	9.15691	8.91368	9.20954	9.77785	9.89555	9.74183	9.63594	10.1229	9.58348	9.29874	9.34418	9.54523	9.4045	9.86897	9.16614
ENSRNOG00000001494	13.826	13.6553	14.1064	13.3917	13.995	14.0183	13.8834	13.9763	13.995	14.0594	14.0027	13.8284	13.7848	13.8539	13.8246	14.0449	13.9525
ENSRNOG00000001499	7.1345	6.22865	6.32824	6.38387	6.24397	6.58729	6.24089	6.64789	6.19791	6.4685	6.94116	6.51847	6.12054	6.83701	6.80214	6.74839	5.96414
ENSRNOG00000001500	11.1089	10.8875	11.2128	10.7006	11.041	11.2273	11.2876	11.343	11.1731	11.2961	11.3457	11.0672	10.9221	11.2613	11.2437	11.2393	11.0235
ENSRNOG00000001501	10.0438	9.81842	10.0484	9.89573	9.86532	10.0805	9.88966	9.84875	9.92721	9.71138	10.1287	9.94085	9.71357	9.99503	10.0068	10.1685	9.78385
ENSRNOG00000001506	12.4203	12.8865	12.6311	12.823	12.5726	12.8102	13.2809	13.2295	12.999	12.4805	12.9772	12.7359	12.5414	12.9456	12.9924	12.7711	12.8353
ENSRNOG00000001514	8.95527	8.85123	9.19926	9.10524	8.58515	8.90468	9.05115	9.00997	9.07049	9.02409	9.46594	8.95337	8.83933	9.02362	9.11655	9.20862	8.87289
ENSRNOG00000001517	12.0843	12.2535	12.0857	12.2644	12.0968	12.2506	12.3106	12.0296	12.0108	11.9169	11.8681	12.1815	11.9986	12.3243	12.2756	12.013	11.9658
ENSRNOG00000001524	11.1535	10.734	10.9379	11.1417	11.0274	11.0507	10.9726	10.7707	10.7578	10.7571	10.792	10.9535	10.6866	10.9034	10.946	11.1833	10.891
ENSRNOG00000001525	12.8543	12.6514	12.931	12.7136	13.025	12.9229	12.9907	13.0123	12.6547	13.331	12.7552	12.8753	13.0654	12.9262	12.7877	12.7503	12.9324
ENSRNOG00000001527	7.79517	7.69302	7.93135	8.06131	8.0405	7.81359	7.8382	7.85543	7.38994	7.49815	7.79186	7.8274	7.37897	7.58428	8.14839	8.06392	7.80429
ENSRNOG00000001528	14.1175	14.007	14.0838	14.4045	13.5814	13.6134	13.625	13.7689	13.8468	13.1248	13.7807	13.9202	13.6454	13.8192	14.0097	13.4927	14.1666
ENSRNOG00000001531	9.99569	9.8025	9.9354	9.59287	10.208	10.1847	10.1536	9.90343	9.8416	9.97405	9.92549	9.9676	9.7815	10.2001	10.0076	10.1254	9.673
ENSRNOG00000001544	12.2959	12.1877	12.2015	12.6348	12.5233	11.7138	12.3318	12.7742	12.8308	12.4047	12.4734	12.2981	12.5529	12.4395	12.1333	12.3983	12.4035
ENSRNOG00000001547	10.7939	10.5606	10.6224	10.5264	10.6888	10.8483	10.853	10.847	10.6298	11.1532	10.5511	10.7092	10.7877	10.7534	10.8015	10.6638	10.6489
ENSRNOG00000001548	12.1	11.7485	11.9655	11.8628	12.2549	12.2332	11.9903	11.711	11.943	12.0232	11.8982	12.0316	12.2346	11.8041	12.0808	12.1011	11.6906
ENSRNOG00000001551	13.0993	12.9181	12.9663	12.8105	13.0845	13.0571	13.056	13.1041	13.0812	12.874	13.1555	12.9996	12.9407	12.9952	13.125	13.0393	12.9824
ENSRNOG00000001555	11.5848	11.2028	11.7099	11.5836	11.7106	11.6199	11.626	11.3932	11.2902	11.5133	11.4048	11.5084	11.2998	11.4219	11.4422	11.7704	11.6264
ENSRNOG00000001557	9.32764	9.04405	9.1048	9.4609	9.21796	8.95654	9.28608	9.38591	9.46259	9.64095	9.37833	9.21431	9.4211	9.18284	9.21294	9.4756	9.14242
ENSRNOG00000001559	11.8841	11.3868	11.7185	11.6713	11.705	11.8219	11.765	11.6579	11.6448	11.4511	11.6745	11.6757	11.4066	11.8096	11.6773	11.8799	11.5844
ENSRNOG00000001571	6.25429	6.67572	6.38614	6.64853	6.43419	6.50951	6.48791	6.09021	6.36787	5.97237	5.58777	6.40508	6.13048	6.35443	6.25246	6.18599	6.68549
ENSRNOG00000001575	11.5747	11.4376	11.5165	11.8734	11.3796	11.3595	11.8898	11.8218	11.5107	11.6411	11.7778	11.5757	11.8503	11.6258	11.5635	11.209	11.8098
ENSRNOG00000001584	9.1591	9.00612	9.06092	8.87716	9.41632	9.32057	9.49319	9.19149	9.60983	9.01217	9.22114	9.15103	9.14826	9.15145	9.21938	9.42214	9.09659
ENSRNOG00000001593	11.2959	11.2092	11.369	11.4535	11.249	11.495	11.5001	11.4806	11.252	11.2847	11.3456	11.32	11.1538	11.3105	11.3442	11.4801	11.4772
ENSRNOG00000001597	13.9846	13.913	13.9333	14.0913	13.7197	13.8219	14.0419	14.2062	14.0761	14.1513	14.1829	13.912	13.9516	13.9267	13.8663	14.0076	14.244
ENSRNOG00000001607	11.6801	9.45276	10.4947	10.8336	10.5911	10.3157	9.64852	10.6601	10.9508	10.6208	10.7744	10.5827	10.7151	9.8785	11.283	11.1954	9.68667
ENSRNOG00000001611	13.5949	13.632	13.6853	13.6604	13.5927	13.5731	13.447	13.3804	13.4827	13.2503	13.4453	13.589	13.5136	13.5335	13.5154	13.4289	13.6596
ENSRNOG00000001621	8.76597	8.117	7.75575	8.54424	8.10766	8.02313	8.43298	9.08668	8.88774	8.9189	8.66464	8.28886	8.53184	8.29421	8.45996	8.60813	8.40106
ENSRNOG00000001622	6.27607	6.19793	5.9213	5.99409	5.65025	5.70419	5.64009	6.28194	6.27164	6.10175	5.83713	6.00851	5.71319	6.27337	6.34619	5.89871	5.72421
ENSRNOG00000001628	14.9236	14.3012	14.6455	14.4362	14.4855	14.4402	14.1291	13.9716	14.2124	13.9481	14.2427	14.5117	14.5144	14.5163	14.3424	13.9611	14.4674
ENSRNOG00000001629	13.3833	13.3413	13.3219	13.4369	13.2731	13.1603	13.3579	13.5248	13.4234	13.4605	13.3338	13.3056	13.169	13.3042	13.3604	13.4345	13.5222
ENSRNOG00000001633	13.6126	13.2954	13.4746	13.4544	13.3488	13.4443	13.2877	13.1979	13.295	13.3644	13.3806	13.4282	13.3997	13.4351	13.3891	13.3968	13.2985
ENSRNOG00000001640	12.8753	12.8797	13.035	13.0374	12.984	13.0055	13.1444	13.1617	13.0112	12.9783	12.9458	12.9638	12.9158	12.9707	12.971	13.0086	13.1355
ENSRNOG00000001652	9.8609	9.91403	9.78193	9.93806	9.89796	9.84169	9.79821	9.80987	10.0636	9.62259	9.93633	9.91126	10.1387	9.89764	9.93039	9.73998	9.62611
ENSRNOG00000001653	11.8685	10.6237	10.8437	11.0949	11.4371	11.3111	10.9172	10.6658	11.1422	11.2571	11.1061	11.1131	11.0383	10.6963	11.1043	11.8484	10.8875
ENSRNOG00000001654	13.1873	12.7427	13.0935	12.8914	13.1521	13.1999	13.1963	13.2033	13.0998	13.5322	13.1369	13.1065	13.5044	13.115	13.0724	12.9762	12.9699
ENSRNOG00000001656	7.0861	7.22879	6.93915	6.87661	7.04658	6.44548	7.33039	6.84853	6.99053	7.06787	7.20992	7.00323	7.15376	6.34411	7.90847	6.45654	7.16703
ENSRNOG00000001657	13.1249	13.1828	13.0828	13.2177	12.9838	12.9237	13.056	13.3946	13.2296	13.5333	13.3261	13.123	13.31	13.1303	13.151	13.1312	13.1734
ENSRNOG00000001662	13.2221	13.2618	13.2119	13.1283	13.2804	13.3211	13.3747	13.4061	13.3543	13.518	13.3546	13.2671	13.313	13.3394	13.3257	13.3772	13.1781
ENSRNOG00000001679	6.43044	7.38937	7.00155	6.76212	6.89929	6.99891	7.12442	7.42112	7.50086	7.06045	7.3937	6.91301	6.58572	6.77454	7.37512	7.60191	7.0034
ENSRNOG00000001691	8.48057	9.27154	8.77884	8.91085	8.96338	8.72203	8.66214	8.79797	8.71418	8.61659	8.03841	8.80996	8.86034	8.61402	8.68805	8.24648	9.25968
ENSRNOG00000001692	7.51201	6.40114	7.08212	6.80672	7.01702	7.32555	6.97563	7.11978	7.0615	7.38798	7.43821	7.07368	7.03209	7.28598	7.20048	7.5833	6.39343
ENSRNOG00000001700	12.7111	12.0279	12.5315	12.8382	12.4817	12.5703	12.3131	12.5509	12.3285	12.5365	12.2999	12.5314	13.0013	12.2596	12.3607	12.1906	12.5825
ENSRNOG00000001704	10.8797	10.1036	10.6313	10.5307	10.7818	10.636	10.282	10.379	10.4783	10.0978	10.5357	10.5597	10.4604	10.3833	10.6303	10.6893	10.3068
ENSRNOG00000001706	12.4897	12.3711	12.5348	12.5354	12.3111	12.4309	12.3239	12.5406	12.5969	12.4442	12.4807	12.4584	12.4396	12.5326	12.4807	12.5193	12.3267
ENSRNOG00000001709	14.6571	14.6113	14.7927	14.6547	14.7848	14.7534	14.936	14.8593	14.7941	14.7368	14.7518	14.6945	14.6875	14.5424	14.7669	14.7331	15.0195
ENSRNOG00000001710	13.5762	13.2915	13.4152	13.3372	13.6297	13.6175	13.5611	13.5431	13.5485	13.4178	13.4737	13.4892	13.546	13.5108	13.4782	13.5094	13.4135
ENSRNOG00000001715	11.8789	11.6655	12.2929	11.5948	11.7748	11.7854	11.7995	11.8786	12.0251	11.8401	12.035	11.8529	11.8993	12.0571	11.7273	11.6688	11.9875
ENSRNOG00000001717	13.3153	13.3635	13.3262	13.5341	13.3726	13.4357	13.4298	13.552	13.4682	13.2941	13.3284	13.3871	13.3187	13.5031	13.3148	13.5013	13.3624
ENSRNOG00000001719	13.8397	13.8054	13.7527	13.7288	13.7677	13.7838	13.8755	14.0999	14.0474	13.9357	14.0824	13.7927	13.7514	13.834	13.871	14.0239	13.8831
ENSRNOG00000001720	10.9143	10.8609	10.7936	10.5856	11.0824	11.2772	11.1088	10.8901	11.2293	10.4156	11.1578	10.9273	10.6219	10.99	11.2197	11.3706	10.4804
ENSRNOG00000001727	12.9733	12.7878	12.8676	12.8276	13.0036	12.8531	12.7535	12.7184	12.7176	12.8014	12.8028	12.8542	12.8307	12.7904	12.754	12.8744	12.9057
ENSRNOG00000001728	8.05306	7.57156	7.83999	8.02917	7.45991	7.54787	7.99527	8.00146	7.77481	8.03788	8.33343	7.73159	7.64188	7.76258	7.67828	7.97606	8.23791
ENSRNOG00000001730	11.3803	11.3054	11.3102	11.2853	11.6972	11.2589	11.7539	11.8145	11.5939	12.0124	11.7199	11.4502	11.8629	11.6454	11.3063	11.4321	11.4764
ENSRNOG00000001733	13.1343	12.9544	13.1322	12.9833	13.1823	13.3351	13.283	13.0755	13.0712	13.2572	13.1837	13.1265	13.0935	13.1869	13.1365	13.333	12.9628
ENSRNOG00000001736	12.4089	12.2486	12.2819	12.5071	12.2653	12.3663	12.3883	12.2859	12.4407	12.1701	12.5794	12.3544	12.4655	12.3877	12.2586	12.4281	12.2497
ENSRNOG00000001742	11.5771	11.6931	11.9627	11.709	12.0541	11.7927	11.9851	11.7922	11.6648	11.8144	11.8021	11.7859	11.6949	11.8009	11.7882	11.9175	11.8088
ENSRNOG00000001752	9.76488	10.0327	10.0797	9.3608	10.4307	10.5597	10.4515	10.2952	10.3503	9.68056	10.3554	10.0974	9.83285	10.4324	10.3833	10.3989	9.55541
ENSRNOG00000001762	9.87219	9.69488	9.55231	9.85017	9.60123	9.58802	10.0508	10.1266	9.86352	9.93316	9.8698	9.74344	9.70361	9.83037	9.99821	9.69861	9.81634
ENSRNOG00000001769	12.7661	13.3374	13.376	13.3651	12.9403	12.7682	13.3249	13.3861	13.3244	13.4028	13.2891	13.1335	13.2331	13.1751	13.2401	12.998	13.3458
ENSRNOG00000001770	9.73658	9.69933	9.70732	9.78905	9.79527	9.4643	9.84298	9.76779	9.8422	10.246	9.57956	9.76382	9.90495	10.0303	9.74724	9.72881	9.43512
ENSRNOG00000001773	13.596	13.3464	13.4389	13.4879	13.3149	13.3726	13.2266	13.3621	13.3582	13.4432	13.4645	13.4018	13.3139	13.4474	13.2986	13.5236	13.4222
ENSRNOG00000001783	13.6471	13.6607	13.6884	13.7263	13.7215	13.5884	13.7126	13.5209	13.6151	13.7237	13.4353	13.6718	13.6633	13.6849	13.6655	13.5997	13.6057
ENSRNOG00000001789	12.9138	12.7796	12.9689	12.6093	13.0626	12.9413	12.5662	12.7201	12.7008	12.6402	12.8768	12.8604	12.8409	12.94	12.6869	12.8224	12.7378
ENSRNOG00000001792	6.67789	5.44384	5.93004	6.44083	6.26916	6.20043	5.84971	6.33446	6.40646	6.41248	6.42251	6.13885	6.71644	5.44316	6.12786	6.53584	6.21513
ENSRNOG00000001796	12.4459	13.2962	12.6929	12.3479	13.0476	13.0159	13.5066	13.6212	13.4831	12.9613	13.4948	12.9121	12.8449	13.3635	13.1539	13.1051	12.8452
ENSRNOG00000001797	11.4916	11.2905	11.3972	11.3194	11.3952	11.4549	11.4811	11.2979	11.3812	11.1106	11.2706	11.3326	10.92	11.3222	11.4022	11.5888	11.5224
ENSRNOG00000001803	13.6593	13.5181	13.5607	13.5513	13.5099	13.6667	13.6398	13.4988	13.6127	13.7474	13.6017	13.5695	13.4821	13.5787	13.5989	13.8088	13.4998
ENSRNOG00000001804	11.3438	11.239	11.5558	11.1022	11.5952	11.2801	11.2949	11.4088	11.3815	11.7227	11.3551	11.4099	11.7604	11.2622	11.5506	11.1288	11.2558
ENSRNOG00000001806	6.38729	6.16927	6.00117	5.97959	7.40638	5.91331	6.37768	5.55132	5.90522	5.81311	5.83395	6.33406	6.85281	5.58753	6.70921	5.59706	5.98913
ENSRNOG00000001809	5.89303	6.42434	5.99367	6.3063	5.59949	6.13735	5.6099	5.86027	6.31729	6.52351	6.16813	6.11221	7.0579	5.83765	5.76012	5.70574	6.03922
ENSRNOG00000001811	12.0141	12.4456	12.3094	11.9738	12.4606	12.4779	12.4909	12.3111	12.5142	12.3178	12.1439	12.3102	12.2426	12.4148	12.453	12.386	12.0734
ENSRNOG00000001813	13.3439	13.2686	13.2938	13.5559	13.1043	13.1293	13.2673	13.5695	13.3936	13.3157	13.4383	13.273	13.2385	13.3986	13.1241	13.3357	13.539
ENSRNOG00000001815	13.943	13.9912	13.9987	14.0687	13.8244	13.6786	13.9034	14.2128	14.0477	14.1105	14.1316	13.9428	13.9739	14.0527	13.954	13.9005	14.0489
ENSRNOG00000001817	13.184	13.0348	13.1071	13.0857	13.1343	12.9274	12.9297	12.9347	12.8491	13.1413	13.0236	13.059	13.0591	13.0545	12.9441	12.9852	13.1331
ENSRNOG00000001821	10.6931	6.58309	7.62134	7.91714	8.39414	8.57936	7.38473	7.01527	8.48513	8.16586	9.42876	8.12708	8.0298	6.95289	8.37288	10.0843	7.54356
ENSRNOG00000001823	11.8835	11.3585	11.1426	11.6717	11.2156	11.2991	11.3067	11.5048	11.6252	11.7013	11.8527	11.433	11.4007	11.0379	11.8876	11.9134	11.245
ENSRNOG00000001827	13.1143	13.716	13.4374	13.705	13.6676	13.4876	13.9107	13.6992	13.7291	13.6914	13.6015	13.5805	13.69	13.5875	13.8187	13.7204	13.2356
ENSRNOG00000001828	11.9158	11.5825	11.9586	11.8446	11.8204	11.7365	12.0702	11.9337	11.8542	12.126	12.0406	11.8536	12.0052	11.9183	11.9005	11.8052	11.8362
ENSRNOG00000001829	13.3293	13.4231	13.4109	13.3881	13.407	13.4986	13.4499	13.4674	13.4132	13.2756	13.341	13.4137	13.3397	13.3834	13.5433	13.3876	13.3558
ENSRNOG00000001837	12.6793	13.2275	12.9632	13.4153	12.7208	12.6531	12.8117	13.1702	12.7197	12.7255	13.4579	12.898	13.0951	12.8485	12.4795	12.7387	13.5947
ENSRNOG00000001847	12.6121	12.0148	12.3613	12.4146	12.1869	12.1897	12.176	12.3919	12.3792	12.3707	12.3298	12.3183	12.3559	12.374	12.3551	12.2716	12.2052
ENSRNOG00000001849	13.7033	14.0897	13.8608	13.7818	14.2519	14.3129	14.4594	14.356	14.2169	14.1704	14.2009	14.0188	14.0672	14.0576	14.0444	14.3136	14.0901
ENSRNOG00000001852	10.8356	10.6781	10.8416	10.7265	11.0047	11.0074	10.9934	10.9733	10.8616	10.7982	10.9272	10.8662	10.8373	10.989	10.8756	10.9758	10.701
ENSRNOG00000001860	6.16069	7.16374	6.44681	7.60387	6.33854	6.55575	7.05966	7.06413	6.65559	5.8994	6.88903	6.6971	6.58304	5.91888	7.50256	6.5031	7.04557
ENSRNOG00000001861	9.56418	9.87626	9.85423	9.76054	9.74989	9.84292	10.1714	9.90202	9.92981	9.12922	9.7494	9.73638	9.21122	9.89226	9.87591	9.83316	10.0412
ENSRNOG00000001865	5.48455	5.01063	5.29985	5.02257	4.86131	4.81292	4.97093	4.79248	5.27218	5.262	7.13523	5.19436	5.71206	5.4272	5.11813	5.56203	4.46705
ENSRNOG00000001867	10.5546	10.497	10.5187	10.699	10.6159	10.5848	10.7369	10.7682	10.415	10.623	10.4765	10.5665	10.4957	10.55	10.5832	10.5493	10.7575
ENSRNOG00000001873	11.9607	9.92704	11.6769	10.2428	11.7389	11.591	10.8509	10.7434	11.5363	11.1303	11.7435	11.3306	11.7206	11.338	11.7797	11.5379	9.67891
ENSRNOG00000001885	12.1153	11.7643	12.101	12.0454	12.0868	12.1288	12.0282	11.9288	11.8888	11.9781	12.041	12.0239	12.0449	11.9272	12.0015	12.091	11.9923
ENSRNOG00000001889	12.2711	11.9062	11.4452	11.7604	11.988	11.8112	11.1953	11.0149	11.172	11.7097	11.2646	11.7929	11.5132	11.3468	12.0937	11.8944	11.2431
ENSRNOG00000001890	11.159	10.6478	10.9603	10.7959	10.8103	10.9475	10.4746	10.455	10.6326	10.6398	10.5584	10.8221	10.6589	10.442	10.9774	10.8219	10.8254
ENSRNOG00000001924	5.58905	6.41668	5.77703	6.41247	6.24441	6.22114	6.49339	6.40183	6.24359	6.06797	6.21565	6.09475	6.16279	5.83422	6.195	6.44706	6.25107
ENSRNOG00000001926	10.8015	7.9645	8.44921	8.75989	9.28123	8.87654	8.25684	8.49228	9.42851	9.18845	9.89878	8.92312	8.71036	7.47739	9.98745	10.5332	8.40456
ENSRNOG00000001928	12.1279	11.7057	12.1466	11.5364	12.3512	12.5088	12.3081	11.979	12.1488	12.4475	12.0376	12.0644	12.2017	12.1344	11.8666	12.3353	12.0197
ENSRNOG00000001930	11.0261	11.0216	11.0745	10.8913	10.7739	10.9567	10.6848	10.9644	10.8601	11.1221	10.923	10.9613	10.9183	11.0298	10.9593	10.8739	10.915
ENSRNOG00000001931	13.9576	13.9811	13.832	14.2788	13.6075	13.8093	13.9196	13.9629	13.8125	13.632	13.8275	13.8939	13.8648	13.8353	13.8788	13.612	14.1937
ENSRNOG00000001942	5.0367	5.21975	4.43597	5.53286	4.4392	4.78594	5.23618	5.04172	5.09252	4.79662	5.37008	5.00341	4.92641	5.36425	5.28956	5.09716	4.31968
ENSRNOG00000001943	6.6293	7.13037	6.68844	6.51182	7.20481	7.4292	7.12783	7.26839	7.05413	7.09571	6.65262	6.94617	7.29269	6.72123	6.90766	6.71702	7.24615
ENSRNOG00000001945	4.48288	4.54689	4.53777	4.49644	4.80298	4.2757	4.66571	5.08596	4.4334	4.82927	4.8097	4.58219	4.72112	4.38232	4.99364	4.37257	4.66635
ENSRNOG00000001949	4.59626	5.38183	5.14108	5.28842	5.27902	5.19638	5.26252	5.27525	5.05251	5.59945	5.45121	5.16768	5.46853	5.39375	4.76383	5.45596	5.02811
ENSRNOG00000001950	4.41733	4.59019	4.85769	4.55244	4.48604	4.95427	4.44999	4.69483	4.79586	4.37429	4.65088	4.63756	4.75719	4.65764	4.46528	4.58209	4.64986
ENSRNOG00000001951	4.72502	4.76542	4.86448	4.50166	4.81711	4.77237	4.76461	4.65747	4.85299	4.7761	4.79236	4.84019	4.95365	5.76623	4.39579	4.57918	4.1251
ENSRNOG00000001953	10.1535	11.007	9.82249	11.0792	10.0843	9.95294	10.9643	10.7695	10.2124	9.60712	11.1231	10.405	10.4887	10.474	10.5825	9.82206	10.7861
ENSRNOG00000001955	4.91204	5.37821	5.35136	5.40393	4.97484	4.71306	4.96185	5.15476	4.82257	5.62301	4.9129	5.1234	5.10956	4.87899	5.38863	4.90669	5.27358
ENSRNOG00000001957	6.15335	6.78657	6.11879	6.75032	6.34075	6.4274	6.11643	6.37201	6.22252	6.29263	6.53076	6.3957	6.56358	6.07467	6.34589	6.51447	6.38342
ENSRNOG00000001959	8.11998	6.65411	7.32405	7.50648	7.13132	7.03323	7.16836	7.31522	7.08055	8.7346	7.88116	7.29716	8.04992	6.727	7.12831	7.45666	7.79602
ENSRNOG00000001960	11.0854	10.6842	10.9226	11.1978	10.8005	10.8528	10.6112	10.5712	10.5996	9.96685	10.6165	10.8888	10.6088	11.009	10.8384	10.6173	10.6233
ENSRNOG00000001963	11.4451	11.4889	11.3865	11.7571	11.5519	11.5494	11.3706	11.2399	11.2408	11.5063	11.2861	11.5303	11.7742	11.3287	11.4912	11.4005	11.2527
ENSRNOG00000001964	13.4286	13.2219	13.2176	13.0734	13.4688	13.5698	13.41	13.5684	13.4045	13.4094	13.4386	13.348	13.4353	13.3163	13.4004	13.384	13.3571
ENSRNOG00000001967	4.81859	4.64287	5.0474	4.5199	4.35425	4.24467	4.48169	4.31633	4.99972	4.82982	4.58939	4.67571	4.43743	5.06489	4.95141	4.63276	4.05679
ENSRNOG00000001971	12.8437	12.5652	12.7205	12.5983	12.5957	12.6344	12.4413	12.7538	12.6986	12.9701	12.7049	12.6697	12.7422	12.6212	12.7059	12.717	12.6261
ENSRNOG00000001973	5.17393	5.27256	5.51011	5.38827	6.13501	6.29831	6.48894	5.65675	5.8399	5.55363	5.5399	5.66172	5.87922	5.44173	5.85632	5.99757	5.36511
ENSRNOG00000001976	5.70349	5.2063	5.38935	5.5346	5.46068	5.52949	5.35159	5.11757	5.27372	5.83471	5.85506	5.40645	5.35108	4.79243	5.69066	6.19714	5.31519
ENSRNOG00000001979	12.575	12.2915	12.4929	12.2695	12.706	12.6077	12.5721	12.6554	12.6368	12.7047	12.6943	12.5163	12.5862	12.6048	12.5132	12.7569	12.331
ENSRNOG00000001980	4.59728	4.70161	5.25701	4.9941	5.14441	4.89896	5.12979	5.21763	5.11896	4.88911	4.91683	5.01343	5.30037	4.83848	5.38864	4.7211	4.70574
ENSRNOG00000001982	11.775	11.8778	12.0994	11.3641	12.3081	12.2886	12.1913	12.008	11.8966	12.2824	12.0391	11.9532	11.8867	11.9886	11.9905	12.2212	11.937
ENSRNOG00000001984	4.99464	4.9401	5.28875	5.12903	4.93411	5.4935	4.89516	5.20262	5.03103	4.98754	5.01093	5.12725	5.11005	5.42454	4.83057	5.16403	4.91014
ENSRNOG00000001986	4.48403	5.10006	4.73923	4.72439	4.90685	4.74887	4.74848	4.66016	4.71309	4.77799	5.37246	4.73515	4.52843	4.26725	5.11726	5.41903	4.69936
ENSRNOG00000001989	13.4324	13.6912	13.6769	13.7168	13.4719	13.6905	13.6863	13.8237	13.7943	13.7165	13.7779	13.6237	13.7042	13.7823	13.4471	13.7218	13.7101
ENSRNOG00000001990	5.23928	5.1294	5.32899	4.88021	5.15826	5.60058	5.28293	5.48716	5.18814	5.25409	5.22953	5.25096	5.323	4.75153	5.84739	4.97676	5.36331
ENSRNOG00000001991	12.8815	12.7412	12.8698	12.7287	12.9399	13.0009	12.9033	12.8121	12.8497	12.4676	12.8904	12.8277	12.5842	12.8192	12.8842	12.9901	12.853
ENSRNOG00000001996	13.1139	12.9636	12.9894	13.1337	13.1799	13.1354	13.16	13.0092	13.0249	13.1028	12.9402	13.089	13.1146	13.0389	13.1313	13.1366	12.9331
ENSRNOG00000002002	4.46084	4.55129	4.08346	4.32859	4.33788	4.52539	4.40852	4.35853	4.2677	4.44104	4.23502	4.3602	4.4349	4.10438	4.41509	4.2455	4.61556
ENSRNOG00000002011	6.52317	7.4315	6.56684	6.27691	7.49613	7.84281	7.97707	8.46054	7.81314	6.45951	7.86728	7.16523	6.47709	7.93789	7.93476	7.85883	6.37654
ENSRNOG00000002012	10.6957	10.5182	10.7207	10.7921	10.6287	10.5987	10.4699	10.4476	10.5044	10.3311	10.3995	10.6454	10.7256	10.5573	10.572	10.3445	10.6305
ENSRNOG00000002014	5.57992	5.041	5.04239	4.84749	5.10624	5.27894	5.27182	5.38974	5.51753	5.30031	5.68369	5.18248	4.97276	5.1395	5.6341	5.6108	4.97595
ENSRNOG00000002026	9.00749	9.22347	8.43512	8.96201	8.30691	8.69693	8.53815	9.70575	9.49483	9.26933	9.01716	8.81149	8.38804	9.24565	9.03781	9.42087	8.65739
ENSRNOG00000002028	14.1264	13.9449	14.236	13.7881	14.3503	14.2871	14.2346	14.078	14.1116	14.1633	14.1057	14.1531	14.1427	14.2047	14.2982	14.1543	13.8623
ENSRNOG00000002031	9.8399	9.8342	10.1804	10.3021	8.96968	9.43562	8.95184	9.54313	10.0045	9.58257	8.51976	9.67062	9.28097	9.36964	9.82303	9.33603	10.0582
ENSRNOG00000002035	12.8136	12.7398	12.639	12.7904	12.8044	12.7818	13.0443	13.1127	13.0677	12.8305	13.082	12.7879	12.7603	12.9192	12.8426	13.0291	12.8039
ENSRNOG00000002042	7.12748	7.63757	7.82708	7.08743	8.17632	8.18375	8.14615	7.38455	7.5608	7.2764	6.67729	7.67108	7.49308	7.38774	8.11929	7.30342	7.53304
ENSRNOG00000002044	9.95634	9.66397	10.2015	10.1155	10.1168	10.3238	10.1246	9.82791	9.77212	9.73273	9.94174	10.0354	10.0767	9.85902	10.0047	10.0294	9.96229
ENSRNOG00000002045	12.8881	12.848	12.895	12.7014	12.8483	12.7677	12.7812	12.7729	12.7359	12.9578	12.821	12.8309	12.9603	12.7099	12.8594	12.5973	12.9786
ENSRNOG00000002050	13.9096	13.9329	13.8442	13.8491	13.8491	13.7245	13.5869	13.548	13.7418	13.6487	13.8622	13.8273	13.7644	13.7738	13.7977	13.8431	13.7161
ENSRNOG00000002052	11.3339	11.0447	11.0767	10.9887	11.2722	11.1905	10.9682	10.843	11.2511	11.0343	11.1867	11.156	11.1218	11.0125	11.3628	11.3882	10.6843
ENSRNOG00000002055	11.0197	10.9854	11.1771	11.0537	11.1608	11.2322	11.3583	11.1426	11.0651	10.88	11.0511	11.1085	10.9365	11.2733	11.1379	11.0994	11.0683
ENSRNOG00000002057	8.26876	8.96037	7.46782	8.30322	8.89161	8.60027	9.47496	8.19822	8.3481	8.0145	8.63568	8.42956	8.44951	8.3869	8.53756	8.45029	8.49888
ENSRNOG00000002074	8.2313	7.60047	7.8476	8.06963	7.82307	8.18457	7.90291	8.25373	8.05819	8.35135	8.46035	8.00456	8.2161	7.81242	8.25591	8.41962	7.61196
ENSRNOG00000002079	13.0411	13.389	13.2042	13.3171	13.3079	13.2641	13.6211	13.5905	13.3742	13.3991	13.3319	13.2608	13.1305	13.3176	13.3755	13.432	13.437
ENSRNOG00000002085	8.41357	9.31117	9.65668	8.74191	8.69617	8.92478	8.36111	8.52341	8.79975	9.06874	8.57717	8.90161	8.99597	8.84527	8.52899	8.54341	9.25711
ENSRNOG00000002093	9.79247	9.23714	9.54568	9.4323	9.52029	9.52186	9.37708	9.47373	9.67327	9.57518	10.0106	9.5138	9.68077	9.18933	9.70437	9.7944	9.40325
ENSRNOG00000002094	12.5882	12.4068	12.5703	12.5295	12.6506	12.6563	12.5838	12.5031	12.4871	12.538	12.4402	12.5561	12.637	12.5436	12.4223	12.5055	12.6068
ENSRNOG00000002097	10.7984	10.9884	11.2047	10.8312	11.1878	11.115	11.6198	11.1333	10.8864	11.56	11.5106	11.0644	10.8445	11.448	11.1618	11.538	10.7806
ENSRNOG00000002101	13.5449	12.8471	12.9363	13.164	13.0994	13.1691	12.8322	12.7851	12.9144	12.9489	12.8377	13.0656	12.9524	12.8749	13.0025	13.1758	13.0655
ENSRNOG00000002104	11.767	11.6582	11.627	11.6051	11.8573	11.9006	11.8856	11.8618	11.7988	11.9366	11.8502	11.7622	11.91	11.7893	11.7449	11.8442	11.6682
ENSRNOG00000002115	14.7641	14.6758	14.7876	14.7903	14.7372	14.6948	14.458	14.4644	14.5732	14.5013	14.5322	14.69	14.519	14.541	14.7007	14.7945	14.6505
ENSRNOG00000002117	8.93989	5.85505	8.60753	7.24138	7.50968	6.74408	6.53606	6.53956	7.18874	6.63934	7.49091	7.45994	7.63731	7.71901	6.88556	6.4439	7.50707
ENSRNOG00000002120	8.56065	7.36838	9.05164	6.4766	8.42835	8.41284	7.73837	7.75962	8.03639	8.89399	8.88805	8.24321	8.49471	8.67863	8.71706	8.09284	6.80864
ENSRNOG00000002121	12.6309	12.5692	12.7908	12.3231	13.0116	13.0583	12.9543	12.809	12.7702	12.9372	12.9169	12.7988	12.9357	12.9538	12.916	12.8925	12.2899
ENSRNOG00000002122	10.7844	10.4149	10.5905	10.8027	10.6372	10.7069	10.5141	10.5134	10.4646	10.7822	10.7315	10.625	10.5094	10.4877	10.6909	11.0887	10.3753
ENSRNOG00000002126	13.2447	13.3327	13.3536	13.5614	13.072	13.1444	13.2753	13.3182	13.0843	13.4676	13.1512	13.3138	13.5638	13.3163	13.2351	12.8405	13.4346
ENSRNOG00000002141	13.3906	13.2011	13.3718	13.6739	12.944	13.0514	13.4265	13.4143	13.2572	13.3064	13.4014	13.2723	13.3541	13.201	13.2631	13.0138	13.707
ENSRNOG00000002142	13.973	13.7345	13.6292	14.1419	13.5428	13.4398	13.4836	13.482	13.3684	13.616	13.6791	13.6596	13.2824	13.4048	13.7876	13.9332	13.8237
ENSRNOG00000002144	11.9065	11.676	11.9925	11.9465	11.7551	11.9179	12.0774	12.1135	11.9897	12.0506	11.9762	11.8813	11.8992	11.9297	11.908	11.9286	12.0241
ENSRNOG00000002149	8.42726	8.465	8.42222	8.39067	8.15349	8.34665	8.22461	7.84044	8.21983	7.83305	7.82879	8.33653	8.08701	8.34953	8.38688	7.95929	8.28001
ENSRNOG00000002154	9.47198	9.55908	9.60668	9.62435	9.25721	9.904	9.30106	9.51202	9.36179	9.88567	9.47656	9.55654	9.61414	9.38962	9.5818	9.73389	9.39863
ENSRNOG00000002158	7.60421	8.55332	8.05939	8.56257	7.69432	8.08435	8.12927	8.16757	7.85395	8.03126	8.48297	8.06104	7.78037	7.97712	8.23369	8.46419	8.07052
ENSRNOG00000002159	9.62248	9.19607	9.05905	9.44303	9.41615	9.52663	9.78509	9.88762	9.50573	9.25294	9.24714	9.37356	9.18503	9.38261	9.53096	9.37923	9.72306
ENSRNOG00000002161	8.00754	7.85348	7.88304	7.91889	7.9254	7.90603	7.80824	7.92024	7.7852	7.82506	8.09975	7.89154	7.59523	8.00126	7.93299	8.24857	7.73002
ENSRNOG00000002164	6.43195	5.06336	6.51743	5.94935	5.42572	5.57901	5.88982	5.73437	5.63035	5.3564	5.75966	5.77108	4.7884	6.06221	6.12232	5.88555	5.93913
ENSRNOG00000002165	8.18871	7.21211	8.29652	7.77256	8.17835	8.20404	8.13559	8.13221	7.96871	8.28067	8.40725	8.03502	8.19284	8.15941	8.11061	8.32207	7.54678
ENSRNOG00000002167	6.23847	7.04145	6.3782	6.49852	5.98001	6.40797	6.1355	6.18152	6.352	6.45466	6.61662	6.34673	6.00714	6.21386	6.35499	6.72736	6.61866
ENSRNOG00000002168	6.90966	8.12088	7.20637	7.36632	7.24605	7.18854	7.34154	7.03695	6.87088	7.0526	6.62359	7.31595	6.71091	8.21573	6.8791	6.97809	7.1911
ENSRNOG00000002175	11.291	11.0874	11.2297	11.2258	11.1186	11.0692	11.3626	11.6967	11.3207	11.9002	11.553	11.2382	11.4651	11.4632	11.1934	11.2757	11.2875
ENSRNOG00000002186	13.0383	13.0925	13.1819	13.1096	13.1854	13.1091	12.9942	12.8758	12.9509	12.7936	12.806	13.0691	12.8764	12.9637	13.0655	13.0509	13.1399
ENSRNOG00000002187	5.0835	4.63124	4.65615	4.92565	4.81939	5.02883	4.77433	4.97122	4.79234	4.85828	5.10583	4.76651	4.38465	4.01492	5.35422	5.59357	4.97124
ENSRNOG00000002188	7.95085	8.16949	7.36766	8.80213	7.61838	7.96754	8.17577	8.11252	8.10283	7.56105	8.29757	7.87276	7.37306	7.67433	7.93146	8.87523	8.1199
ENSRNOG00000002191	9.90296	10.1649	9.9142	9.7939	10.0351	9.98093	9.94534	9.8588	10.0457	9.88616	9.77954	9.97089	9.87529	9.98909	10.0816	9.91137	9.84819
ENSRNOG00000002194	11.1404	11.8847	11.2055	12.3104	11.4669	10.5613	12.4194	13.167	12.7469	12.8359	11.8375	11.5866	12.0507	12.0651	11.5948	11.7125	12.1593
ENSRNOG00000002199	11.4169	11.251	11.2214	11.2392	11.3181	11.4928	11.3305	11.2206	11.2721	11.1802	11.277	11.3147	11.1304	11.4182	11.344	11.4869	11.0971
ENSRNOG00000002205	14.7582	14.5963	14.6	14.5524	14.8483	14.8647	14.7363	14.68	14.6454	14.683	14.7109	14.6979	14.6405	14.5592	14.8617	14.8732	14.5543
ENSRNOG00000002210	13.8754	13.6741	13.8854	13.5145	13.9507	13.9095	13.6218	13.546	13.6307	13.7798	13.6439	13.8047	13.7763	13.848	13.808	13.762	13.5011
ENSRNOG00000002212	8.19393	9.56157	8.70997	8.66266	8.82834	9.3564	9.71762	9.46599	9.57395	8.32612	9.12062	8.97252	8.41939	9.45083	9.56956	9.23085	8.51976
ENSRNOG00000002216	12.0273	11.8634	11.8725	11.9078	12.2223	12.1347	12.3465	12.1297	12.0564	12.1723	12.0584	12.0178	12.0318	11.8728	12.228	12.2108	11.9838
ENSRNOG00000002218	10.0103	9.54392	9.69744	9.85547	9.97129	9.64809	9.67892	9.50887	9.70755	9.74289	9.64161	9.82969	9.9623	9.87119	9.90716	9.73392	9.22581
ENSRNOG00000002225	11.2651	11.4649	11.4077	11.58	11.0748	11.2999	11.6156	11.2466	11.2908	11.8894	10.9475	11.3673	11.372	11.3511	11.49	11.2244	11.4157
ENSRNOG00000002227	11.0449	12.8723	11.9542	12.409	12.4057	12.1272	13.033	13.0706	12.5648	12.0617	12.3738	12.1755	12.0375	12.2778	12.4505	12.4079	12.4983
ENSRNOG00000002229	10.7748	11.0231	10.4997	11.0622	10.5989	10.4666	11.3685	11.6057	11.3377	11.2072	11.4284	10.8589	11.0052	11.274	11.0259	10.8902	10.869
ENSRNOG00000002240	12.9339	12.6346	12.8916	12.8575	12.747	12.8669	12.7544	12.7713	12.6854	12.899	12.8186	12.8129	12.878	12.7596	12.7468	12.7775	12.8699
ENSRNOG00000002241	10.396	9.84047	10.4102	10.1027	10.1131	10.2135	10.0554	9.97534	10.0539	10.0945	10.114	10.1559	10.0888	10.2019	10.0368	10.1177	10.1961
ENSRNOG00000002247	11.6376	11.4279	11.6032	11.6012	11.3346	11.3764	11.215	11.4076	11.5102	11.463	11.4485	11.5032	11.546	11.4875	11.5148	11.3791	11.3847
ENSRNOG00000002251	13.9106	13.6974	13.9053	13.9356	13.9552	13.8788	13.953	13.8881	13.9377	13.7958	14.0438	13.8817	13.8267	13.8163	14.0091	14.1123	13.7251
ENSRNOG00000002253	8.58491	7.39171	8.46004	8.09672	8.39483	8.38285	8.28511	8.39195	8.10509	8.24366	8.42204	8.2787	8.14532	8.53098	8.52097	8.50779	7.56573
ENSRNOG00000002254	12.3358	12.0388	12.2028	12.1727	12.3767	12.4421	12.3118	12.2258	12.1352	12.2227	12.1244	12.2528	12.2715	12.1816	12.2531	12.2679	12.213
ENSRNOG00000002255	12.561	12.6665	12.6757	12.6093	12.6868	12.6868	12.5401	12.4062	12.538	12.402	12.5814	12.6251	12.5085	12.6247	12.6067	12.7043	12.4724
ENSRNOG00000002256	10.5724	10.1557	10.6953	10.8698	10.4041	10.4846	9.75049	9.82476	9.63214	9.93607	9.84313	10.4064	10.3179	10.2214	9.93669	10.1472	10.4881
ENSRNOG00000002262	11.9747	11.8263	11.9596	11.7142	11.7217	11.9457	12.0463	12.1031	12.0313	12.2461	12.0116	11.9055	11.9864	12.0569	11.9643	11.8141	11.9539
ENSRNOG00000002265	8.81074	7.77496	8.44367	7.77534	8.89491	8.48605	8.92315	8.88828	8.29956	9.81078	8.74593	8.51633	9.03739	8.77658	8.6473	8.44037	8.1495
ENSRNOG00000002270	13.7769	13.8237	13.8505	13.8552	13.9473	13.8474	13.7311	13.5237	13.6248	13.6627	13.3898	13.8323	13.8663	13.8738	13.65	13.5806	13.7419
ENSRNOG00000002273	10.9373	10.3416	11.4141	10.7463	10.8516	10.7871	10.6706	10.4951	10.6302	10.629	10.9889	10.8704	11.0151	10.7463	10.9945	10.5695	10.5937
ENSRNOG00000002275	13.2801	13.25	13.2776	13.4077	13.2036	13.28	13.2746	13.3313	13.2512	13.421	13.1007	13.2772	13.3471	13.2074	13.2413	13.1968	13.4048
ENSRNOG00000002292	14.8233	14.699	14.7335	14.8495	14.8545	14.8626	14.7799	14.5971	14.6279	14.7119	14.6869	14.7854	14.7882	14.7028	14.7551	14.8288	14.6867
ENSRNOG00000002301	12.9369	12.9271	12.8773	12.8287	12.8127	12.9872	12.8741	12.9856	12.9704	13.0863	12.9048	12.8944	12.7828	12.8958	13.0012	13.0886	12.8446
ENSRNOG00000002302	6.58403	5.04544	6.22516	5.70736	5.79703	5.99869	5.74443	5.35188	5.75114	5.38189	7.01553	5.90224	6.17488	5.48942	6.09813	5.99662	5.62332
ENSRNOG00000002303	11.3635	10.2042	10.6706	10.9468	10.1188	10.044	9.92824	9.85166	9.97663	9.97613	10.0907	10.408	9.88694	10.2017	10.2358	10.1608	11.028
ENSRNOG00000002305	13.4789	13.5345	13.259	13.538	13.4484	13.4515	13.3436	13.4165	13.3835	13.4841	13.4445	13.4394	13.4406	13.3873	13.4161	13.5721	13.3606
ENSRNOG00000002309	8.51222	7.28814	7.98627	7.87704	7.64705	7.65522	7.22993	7.79828	7.99267	7.44334	7.71377	7.77122	7.22452	7.7616	7.98896	8.15549	7.58973
ENSRNOG00000002319	12.1015	11.9278	11.7479	12.0139	11.5074	11.8557	11.4922	11.8414	11.9292	11.8553	11.8839	11.8476	11.7125	11.9483	11.8135	12.0095	11.6873
ENSRNOG00000002327	13.1581	13.4175	13.2273	13.1861	13.4165	13.4012	13.4926	13.6234	13.3672	13.2293	13.5151	13.3199	13.3037	13.3714	13.3968	13.326	13.4077
ENSRNOG00000002331	8.01092	7.16826	7.03491	7.45001	7.62296	7.63169	7.02336	6.81888	6.99209	7.13604	7.64784	7.42739	7.08408	7.37011	7.4736	8.15271	6.59071
ENSRNOG00000002332	12.7676	11.0528	11.653	11.8748	12.0742	12.0967	11.3736	11.3709	11.8632	11.9651	11.9674	11.8603	11.8183	11.4035	12.0015	12.7434	11.1731
ENSRNOG00000002333	4.87041	5.33706	5.05617	4.99167	4.95469	4.76852	4.8955	4.92799	4.61616	5.1863	5.3196	5.02918	5.43739	5.34163	4.50505	4.44159	5.26147
ENSRNOG00000002336	13.735	13.1602	13.4118	13.2239	13.3021	13.4296	13.2062	13.142	13.2226	13.5211	13.2608	13.3521	13.2159	13.459	13.2315	13.4389	13.312
ENSRNOG00000002338	12.6403	12.4197	12.6277	12.7285	12.5819	12.6359	12.701	12.6912	12.4224	12.2953	12.4577	12.5756	12.4331	12.6236	12.49	12.4382	12.841
ENSRNOG00000002339	12.4584	12.5346	12.4017	12.6971	12.4688	12.562	12.7331	12.6921	12.6273	12.3786	12.6148	12.512	12.4403	12.5131	12.5322	12.6458	12.6432
ENSRNOG00000002341	10.4105	10.0415	9.93862	10.1766	10.1678	10.4054	9.86396	9.51383	9.84086	10.2568	10.2327	10.1453	10.2579	9.62652	10.2828	10.541	9.71845
ENSRNOG00000002342	12.755	12.3134	12.5498	12.6588	12.4847	12.4758	12.2544	12.4207	12.3254	12.4796	12.4443	12.5051	12.4944	12.4032	12.4109	12.5116	12.5479
ENSRNOG00000002343	14.909	15.0294	14.8636	14.8926	14.7666	14.8334	14.8115	14.8353	14.8379	14.7599	14.7666	14.8403	14.6716	14.8118	14.7851	14.7993	15.1589
ENSRNOG00000002350	7.09388	6.09507	6.30002	6.6024	6.34736	6.52925	6.64042	6.64839	6.38306	6.16666	6.69261	6.50727	6.05885	6.85754	6.68106	6.66575	6.24081
ENSRNOG00000002353	11.6783	11.6891	11.7825	11.8878	11.7341	11.7997	11.8873	11.933	11.7761	11.6184	11.8762	11.765	11.5953	11.9206	11.7975	11.938	11.6727
ENSRNOG00000002358	12.3484	11.937	12.2577	12.2987	12.4643	12.1289	12.1861	12.1981	12.3476	12.3698	12.6023	12.2373	12.4284	12.1792	12.0934	12.6226	12.0744
ENSRNOG00000002360	13.136	13.0607	12.6835	13.0933	12.7965	12.8642	12.6304	12.9219	12.5815	12.7424	12.8966	12.9555	13.0082	12.921	13.0363	12.5856	12.7851
ENSRNOG00000002361	12.1022	10.3662	10.3931	11.9165	10.3634	10.2342	10.2168	10.1866	10.4216	9.78194	9.95711	10.859	11.4361	10.3661	10.5528	9.20642	11.3298
ENSRNOG00000002364	12.1798	13.0703	12.7636	12.537	12.5431	12.409	12.9389	13.3653	13.1583	12.9385	13.0622	12.6459	12.5498	12.9933	12.767	12.7703	12.8935
ENSRNOG00000002365	13.3351	13.3642	12.9867	13.3166	12.9637	13.0272	12.9413	13.0773	13.4107	12.8497	13.1965	13.1793	13.1899	13.1524	13.2782	13.0587	13.016
ENSRNOG00000002369	11.6375	11.0703	11.3279	10.7785	10.8402	11.0848	11.2836	11.5405	11.4989	11.5667	11.3527	11.1709	11.035	11.3496	11.4147	10.9625	11.5333
ENSRNOG00000002373	11.3775	11.5134	11.2814	11.4365	11.3681	11.4241	11.6706	11.902	11.7258	11.8739	11.7174	11.4663	11.5884	11.7084	11.4987	11.6277	11.3729
ENSRNOG00000002378	13.3755	12.9644	13.0948	13.1093	13.1608	13.2325	13.064	12.8906	13.0798	13.0009	13.0901	13.1149	12.9186	13.1213	13.0567	13.3756	13.0218
ENSRNOG00000002379	5.98601	7.43702	6.54806	6.36602	6.47052	6.1542	6.02082	6.52905	6.12404	6.83046	6.53935	6.49876	6.7194	6.33007	6.47757	5.96248	6.81196
ENSRNOG00000002381	8.39766	10.6334	8.4984	10.6239	9.11301	8.92651	10.3863	10.519	9.7874	8.96947	9.61349	9.35641	9.02196	9.49324	9.49951	9.567	10.2196
ENSRNOG00000002382	11.62	10.737	11.2511	10.6459	11.3773	11.1758	10.6005	10.6915	11.2463	11.2975	12.0066	11.0899	11.2407	10.8137	10.9471	11.885	10.8273
ENSRNOG00000002387	13.3215	13.2547	13.2135	13.4081	13.0917	13.2746	13.1987	13.2214	13.2244	13.1269	13.2518	13.2521	13.213	13.2048	13.287	13.2304	13.251
ENSRNOG00000002389	13.8413	13.7646	13.8449	13.9393	13.6741	13.7941	13.8025	13.8413	13.8105	13.8143	13.757	13.8025	13.7459	13.8513	13.7673	13.811	13.8596
ENSRNOG00000002393	12.9389	12.7161	12.9413	12.7792	12.9377	12.8632	12.894	12.7481	12.6805	12.7521	12.7605	12.8242	12.5474	12.7686	12.9254	12.9508	12.9069
ENSRNOG00000002403	8.17611	8.53165	8.32954	8.4493	8.34699	8.31549	8.34941	8.2648	8.33259	8.77779	8.4546	8.36912	8.91325	8.00267	8.25708	8.17986	8.59992
ENSRNOG00000002408	11.718	8.25378	9.21046	9.34292	9.79464	9.86419	8.6396	8.16253	9.45945	9.87143	10.4961	9.65449	9.60449	8.28617	10.8158	11.1608	7.85074
ENSRNOG00000002413	9.88113	10.5646	10.4699	10.7313	10.6919	10.8634	10.9331	10.6802	10.7396	10.367	10.6489	10.5023	10.5455	10.4515	10.3212	11.0691	10.5425
ENSRNOG00000002417	5.21693	5.45015	5.05517	5.10737	5.22415	4.63884	4.87504	4.73282	5.14037	4.63448	5.1909	5.10021	4.94113	5.41037	4.8578	4.92859	5.02873
ENSRNOG00000002418	13.1213	12.5218	12.4499	13.2838	12.4449	12.725	12.358	12.4445	12.7798	12.3795	12.6754	12.6828	12.4077	12.2111	12.9793	13.2803	12.4048
ENSRNOG00000002419	15.5505	15.439	15.4947	15.4702	15.6492	15.6148	15.5951	15.5247	15.4876	15.5235	15.5702	15.5827	15.8028	15.6435	15.5796	15.3779	15.3135
ENSRNOG00000002425	9.4051	7.92232	8.78973	8.14228	8.75549	9.00636	8.63048	8.25954	8.47418	8.72711	8.80533	8.67348	8.42852	8.81608	8.79539	8.98446	8.14681
ENSRNOG00000002433	13.5771	13.4398	13.5151	13.5922	13.3084	13.5655	13.804	13.7937	13.6661	13.7005	13.7766	13.5494	13.6457	13.6367	13.6638	13.4877	13.5913
ENSRNOG00000002434	11.701	11.7527	11.6617	11.4421	11.6823	11.5108	11.8319	11.8223	11.886	11.5668	11.6489	11.6313	11.4712	11.747	11.7134	11.5156	11.9342
ENSRNOG00000002436	13.6734	13.8928	13.8359	13.7983	13.9525	13.8571	13.992	13.9647	13.7812	13.9747	13.9478	13.8541	13.8313	13.9089	13.9369	13.9538	13.7498
ENSRNOG00000002440	11.8757	12.0456	11.8787	11.9151	11.7797	11.9181	11.9161	11.8041	12.0445	11.8257	11.9609	11.901	11.749	11.986	11.9608	12.0697	11.7608
ENSRNOG00000002443	12.2294	11.8322	11.9318	11.6773	11.9285	11.8588	11.9182	11.7943	11.9505	12.2626	12.0539	11.9363	12.0692	12.0109	11.8884	11.8619	11.9063
ENSRNOG00000002449	12.9187	12.7088	12.6545	13.0028	12.5102	12.4263	12.5742	12.6624	12.7679	12.5939	12.6925	12.7017	12.6566	12.7189	12.7181	12.6129	12.7194
ENSRNOG00000002450	11.7459	11.8421	12.012	11.8142	12.0506	11.9989	12.0669	11.7	11.7907	11.5626	11.7241	11.8965	11.7834	12.0369	11.7845	11.7931	11.8632
ENSRNOG00000002454	12.2659	12.1803	12.3729	11.9809	12.2195	12.2523	12.1785	12.2172	12.2174	12.4559	12.3927	12.2274	12.1657	12.3663	12.2428	12.3506	12.1045
ENSRNOG00000002460	4.88973	4.98384	5.05375	5.05805	4.94205	5.12951	5.22483	5.59073	5.32126	5.12418	4.94783	5.05118	5.06555	4.79757	5.54057	4.9715	5.16183
ENSRNOG00000002468	12.3683	12.2632	12.6208	12.3093	12.3036	12.1948	12.4714	12.7152	12.5364	12.9126	12.6139	12.4175	12.6364	12.5592	12.5024	12.2775	12.3989
ENSRNOG00000002470	10.1274	9.06854	9.2697	9.3126	9.54653	9.40692	8.76963	9.09209	9.22122	9.54874	9.62094	9.39806	9.2943	8.83068	9.72587	9.92815	9.05357
ENSRNOG00000002478	12.5828	12.3881	12.4293	12.5854	12.2168	12.4061	12.2058	12.383	12.392	12.3991	12.3829	12.3981	12.3006	12.3351	12.3389	12.4924	12.5204
ENSRNOG00000002484	4.86616	4.84633	4.76498	4.95698	4.42223	4.72444	4.86756	4.82838	4.96388	4.48289	4.58464	4.80668	4.59449	5.0929	4.99159	4.53985	4.58856
ENSRNOG00000002488	9.30628	9.86743	9.25851	9.58003	9.32653	9.16853	9.8531	9.85845	10.0854	10.3947	9.88845	9.53866	10.0647	9.67436	9.60156	9.5594	9.45811
ENSRNOG00000002506	12.2538	12.5186	12.5249	12.5302	12.8373	12.7906	12.9655	13.0211	12.5159	12.5653	12.6042	12.5984	12.5401	12.6406	12.7493	12.6918	12.5882
ENSRNOG00000002511	8.00792	7.95673	7.93614	8.31532	8.13066	7.99627	8.45846	8.29181	8.50598	7.77743	8.25433	8.11999	8.00719	8.49405	8.2356	8.36837	7.6192
ENSRNOG00000002514	9.95149	10.0412	9.78081	9.92506	9.84787	10.1336	10.2668	10.0922	10.0095	10.1336	10.0157	9.98447	9.78485	10.2599	10.1354	10.1952	9.69452
ENSRNOG00000002516	12.1848	12.1919	12.2501	12.3422	12.3138	12.2294	12.4339	12.2788	12.2415	12.2746	12.2807	12.2346	12.1145	12.241	12.2439	12.4528	12.2972
ENSRNOG00000002517	6.72378	6.12539	6.55513	6.74164	6.19868	6.39987	6.18452	6.76981	6.26491	6.65623	7.19009	6.53138	6.78372	6.44052	6.81371	6.55623	6.04866
ENSRNOG00000002524	14.4438	14.2285	14.4064	14.1324	14.3453	14.298	14.3791	14.4809	14.2847	14.6716	14.4134	14.3783	14.6193	14.5133	14.418	14.0437	14.2663
ENSRNOG00000002525	11.3568	11.3137	12.347	11.3364	11.8889	12.1912	11.5733	12.3018	12.2588	12.4188	12.1859	11.7938	12.1817	11.7648	11.7637	12.3467	11.4883
ENSRNOG00000002532	8.32184	7.87222	8.59928	8.65234	8.05152	7.7956	7.52376	8.46821	8.74653	7.8249	6.75394	8.18188	7.88228	8.26551	8.19628	7.77124	8.23787
ENSRNOG00000002536	11.1792	10.6204	10.9126	10.8041	11.0086	11.204	10.9571	10.699	10.7891	10.8783	10.8161	10.9248	10.6438	10.8248	11.1255	11.279	10.6293
ENSRNOG00000002538	8.77737	7.83163	7.77567	8.45725	7.68517	7.41351	7.72582	8.20389	8.01922	8.80953	7.94425	7.95863	7.76571	7.66531	8.25606	8.28935	8.25606
ENSRNOG00000002539	7.71905	7.93295	7.21756	7.61084	8.15675	8.21411	8.20063	8.22242	8.15993	8.014	7.09748	7.80614	7.97262	7.84137	7.59004	7.78466	8.11328
ENSRNOG00000002540	7.45985	6.13449	6.9791	6.11742	7.18972	7.01176	7.16643	7.02886	6.69681	6.91822	7.01296	6.88966	6.80109	7.16822	7.14528	6.61542	6.69003
ENSRNOG00000002541	11.5057	11.2304	11.5399	11.356	11.2995	11.3931	11.2679	11.4657	11.3621	11.5145	11.455	11.3887	11.2937	11.423	11.4571	11.4861	11.3292
ENSRNOG00000002542	8.50786	7.98893	8.29394	8.31693	8.38209	8.23436	8.43045	8.68231	8.40675	8.52174	8.487	8.3082	8.21913	8.58019	8.2504	8.55208	8.28406
ENSRNOG00000002546	10.8317	10.5399	10.7668	10.522	10.6355	10.7401	10.905	10.6469	10.5561	10.8696	10.7639	10.6712	10.5055	10.8017	10.6979	10.7392	10.7695
ENSRNOG00000002553	13.201	13.1199	13.1985	13.074	12.9934	13.0636	13.0154	13.0197	13.0744	13.1895	13.189	13.0864	12.9961	13.0092	13.1222	13.1671	13.2127
ENSRNOG00000002555	5.41538	5.222	4.93586	5.42973	5.0453	4.94982	4.61689	5.24265	5.3507	5.16567	5.4099	5.16124	5.35115	4.92583	5.17605	5.35089	5.00638
ENSRNOG00000002563	11.6374	11.2827	11.5128	11.2827	11.6457	11.7204	11.7362	11.654	11.5644	11.4029	11.7218	11.516	11.3298	11.5507	11.682	11.7502	11.4613
ENSRNOG00000002564	4.53203	4.45229	4.59437	4.56414	5.38768	5.3786	5.24551	4.427	4.59369	4.43744	4.11521	4.73914	4.39409	5.11871	4.23036	5.28713	4.50437
ENSRNOG00000002566	8.38371	9.29625	8.45834	8.69632	8.42804	8.66546	8.51473	9.20772	9.17888	8.5246	8.54531	8.65455	8.68807	8.95769	8.3171	8.45262	9.13699
ENSRNOG00000002568	6.39364	5.64287	6.22779	5.98559	6.25612	6.16306	6.05823	5.79878	6.1857	5.82093	6.35098	6.04415	5.71845	6.0515	5.9583	6.70811	5.94361
ENSRNOG00000002571	7.14122	8.50496	7.93171	8.77175	8.13608	8.45509	9.30405	9.03981	8.54457	7.548	8.5328	8.2749	7.91519	8.59382	9.02427	8.61904	7.57663
ENSRNOG00000002572	13.1712	13.3158	13.2539	13.343	13.1359	13.4426	13.2683	13.1262	13.2963	13.0548	13.0568	13.2632	13.0259	13.278	13.4025	13.4228	13.0146
ENSRNOG00000002574	10.5282	10.4076	10.5951	10.346	10.5562	10.5451	10.6513	10.5305	10.5149	10.5113	10.5269	10.5001	10.2517	10.5861	10.6852	10.6635	10.3988
ENSRNOG00000002579	11.1848	11.508	11.2961	12.2723	10.9928	10.8398	11.9145	12.1403	11.2647	11.7687	11.9895	11.4108	11.6462	11.3388	11.6186	11.1774	11.934
ENSRNOG00000002580	11.0988	10.8227	10.9444	10.8887	11.0098	11.1817	11.1573	11.2	11.1256	11.1431	11.0588	11.018	10.9543	11.1699	11.0919	11.2083	10.8388
ENSRNOG00000002582	4.81293	5.00531	5.09496	5.44097	5.29371	5.18107	5.54611	5.17457	5.36358	4.99167	4.27656	5.11606	4.96554	5.44897	4.80108	5.15586	5.17076
ENSRNOG00000002593	11.4749	10.714	10.6841	11.3893	10.6583	10.8224	10.9299	10.8868	10.922	11.0589	11.0519	10.9089	10.6338	10.737	11.066	11.3955	10.95
ENSRNOG00000002595	10.7553	10.4291	10.4447	11.7922	9.19669	9.80815	10.3374	10.5237	10.0909	9.62343	10.2296	10.3508	10.2743	10.2903	10.1662	9.31452	11.4576
ENSRNOG00000002597	5.08812	5.6738	5.1344	5.16434	4.83157	4.9922	4.82365	4.89395	4.56939	5.18454	5.30187	5.08489	4.78331	4.78964	5.30661	5.03142	5.40309
ENSRNOG00000002598	7.06585	7.43197	6.97041	7.15027	7.07959	7.09476	6.99627	6.83019	6.79578	7.2829	7.29472	7.07213	7.16656	6.68675	7.00302	7.16322	7.42081
ENSRNOG00000002599	7.52979	6.59418	6.47436	7.21831	6.80106	6.82992	7.06994	7.25919	7.12171	6.4242	7.26902	6.86564	6.03333	7.01413	7.29572	7.74049	6.6724
ENSRNOG00000002610	11.0581	10.578	11.2211	10.4358	10.7959	10.675	10.7491	10.6215	10.6529	11.1498	10.9464	10.8707	11.1459	11.0805	10.8462	10.3048	10.6985
ENSRNOG00000002612	10.8603	10.9057	11.0723	10.9816	10.9873	11.1953	11.1058	10.838	10.8649	10.8737	10.9115	11.0039	10.8359	11.1121	11.0842	11.1414	10.6673
ENSRNOG00000002618	14.2723	14.3862	14.4085	14.4342	14.3221	14.129	14.1576	14.2372	14.2476	14.3933	14.2243	14.3283	14.4063	14.3328	14.2634	14.1906	14.2887
ENSRNOG00000002628	5.71577	5.63345	5.40159	5.55761	5.48566	5.46199	5.37981	5.54126	4.96109	5.53328	5.84739	5.53274	5.57132	5.32014	5.64714	5.28123	5.70737
ENSRNOG00000002630	13.2278	13.0806	13.0936	13.0121	13.1093	13.1298	12.9492	12.8678	12.9449	13.0462	12.9717	13.0862	13.1336	12.9625	13.0265	12.9417	13.1606
ENSRNOG00000002636	13.3427	13.4984	13.2817	13.5872	12.9802	13.1941	13.4135	13.6183	13.5367	13.6836	13.5757	13.3947	13.6939	13.4654	13.509	13.1367	13.3167
ENSRNOG00000002640	5.04568	4.96995	5.0573	5.29223	5.14799	5.35696	5.34501	4.68605	5.20059	5.57451	5.46175	5.12814	4.52985	5.00175	5.7516	6.70022	3.94867
ENSRNOG00000002643	11.8893	11.7693	11.8082	11.89	11.7705	11.8493	11.7892	11.6202	11.7716	11.6397	11.737	11.8241	11.7194	11.8393	11.8814	11.8546	11.6134
ENSRNOG00000002653	11.9675	11.6652	12.1182	12.252	12.0266	11.9622	12.2161	11.9173	11.8484	11.9645	12.0732	11.9817	11.9984	12.0285	11.8164	12.1167	12.0336
ENSRNOG00000002657	11.1395	10.5263	10.7967	10.5236	11.1436	11.1635	10.823	10.6323	10.684	11.0048	10.6348	10.9193	11.2182	10.8967	10.8651	10.6749	10.5254
ENSRNOG00000002659	6.73265	6.50313	6.91146	6.79791	6.5823	6.55413	6.32174	6.16797	6.48677	6.29927	6.16193	6.64687	6.30183	6.80951	6.6289	6.63152	6.22406
ENSRNOG00000002660	13.9416	13.9921	13.9503	14.4644	13.826	13.4248	14.3017	14.0498	14.1641	14.1667	13.5155	13.9444	13.9718	13.947	13.9818	13.6486	14.3362
ENSRNOG00000002664	8.30688	8.16898	8.20302	8.70027	8.84858	8.85498	8.99833	8.788	8.49326	8.36131	8.44609	8.51687	8.7051	8.32536	8.53866	8.73825	8.47063
ENSRNOG00000002671	14.7152	14.7208	14.712	14.5923	14.9177	14.8936	14.834	14.712	14.8236	14.7604	14.8342	14.7575	14.7009	14.9756	14.5889	15.0175	14.5779
ENSRNOG00000002693	14.3257	14.3218	14.3071	14.3814	14.3358	14.3169	14.2747	14.1229	14.1666	14.03	14.1498	14.3258	14.244	14.4024	14.2971	14.1737	14.1714
ENSRNOG00000002695	12.0312	11.9742	11.997	12.0354	12.0337	12.0509	12.1118	11.9945	11.8788	11.8618	11.9152	12.0162	11.9169	11.9476	12.1593	11.9117	12.0281
ENSRNOG00000002701	5.1799	4.8844	4.85028	4.86786	4.66637	4.96971	4.98228	5.1799	4.40966	4.90172	5.08008	4.90465	4.84783	5.30015	4.57533	4.42056	5.38779
ENSRNOG00000002705	12.8719	12.4778	12.5825	12.7928	12.5882	12.6247	12.6268	12.5794	12.568	12.7237	12.6843	12.6513	12.8005	12.5023	12.6212	12.5937	12.7211
ENSRNOG00000002711	7.9905	7.35093	7.66797	7.72065	7.27841	7.16231	6.90678	7.32606	7.61222	7.81367	7.8313	7.56185	7.88935	7.57738	7.4192	7.48963	7.22587
ENSRNOG00000002713	10.2159	9.8514	10.0344	9.9522	10.2344	10.2672	10.4387	10.1857	10.3133	10.0724	10.1879	10.1382	10.0971	10.3273	10.2641	10.2841	9.81175
ENSRNOG00000002718	6.45575	6.94566	6.82501	6.83107	7.02395	7.03484	7.09009	6.97492	6.61229	6.55956	6.59471	6.85874	6.94541	6.905	6.76195	6.47538	7.00665
ENSRNOG00000002721	13.8372	13.7547	13.9299	13.7763	13.7295	13.8137	13.6184	13.5335	13.6133	13.4839	13.8408	13.7795	13.607	13.8156	13.7518	13.7898	13.6759
ENSRNOG00000002723	6.69207	5.95922	6.17584	6.43543	6.6743	6.58409	7.05639	6.17198	6.25869	6.60911	6.53047	6.45932	6.74079	6.31558	6.55655	6.476	6.24571
ENSRNOG00000002724	12.775	12.4838	12.7028	12.604	12.7197	12.8623	12.8299	12.6263	12.5736	12.6196	12.6935	12.6849	12.6625	12.767	12.5872	12.6879	12.7024
ENSRNOG00000002728	6.89284	6.81635	6.81596	7.32321	7.1409	7.27118	7.62612	7.32344	6.80088	6.64451	7.45262	7.04606	6.93259	6.56606	7.65543	7.27593	7.04084
ENSRNOG00000002730	13.8043	13.7822	13.4339	13.7325	13.4794	13.4487	13.2493	13.5932	13.7404	13.5708	13.5917	13.6223	13.7579	13.4497	13.7123	13.484	13.5401
ENSRNOG00000002746	12.9757	12.5452	12.2821	13.4501	12.5918	12.4386	12.5791	12.5315	12.5988	12.3794	12.8988	12.6375	12.6654	12.2086	12.5801	13.0387	12.7981
ENSRNOG00000002751	9.37792	9.60224	9.48399	9.64714	9.24669	9.55377	9.87045	10.0544	9.45086	9.61768	9.51571	9.50302	9.06342	9.80857	9.74341	9.60129	9.65347
ENSRNOG00000002754	4.67822	4.51139	4.68007	4.76959	4.20721	4.64963	4.38009	4.75655	4.76201	4.56684	5.01528	4.56755	4.47112	4.65777	4.48299	4.93571	4.5837
ENSRNOG00000002755	13.8678	13.9322	13.9827	13.7822	13.7904	14.0305	14.0145	13.771	13.7969	14.0082	13.7416	13.9044	13.846	13.9073	14.0003	13.7784	13.8977
ENSRNOG00000002757	11.5756	10.9332	11.3183	11.2368	11.3614	11.3552	11.0914	11.0473	11.1199	11.1266	11.0223	11.2467	11.0356	11.1083	11.2962	11.41	11.1731
ENSRNOG00000002759	11.6959	11.745	11.7504	11.9091	11.6757	11.8801	11.9305	11.7031	11.6893	11.4323	11.5554	11.7772	11.6904	11.8453	11.8032	11.5757	11.7385
ENSRNOG00000002767	13.4288	13.485	13.676	13.449	13.6817	13.8258	13.7153	13.7088	13.6228	13.6643	13.7602	13.6013	13.6938	13.6317	13.5402	13.7435	13.5588
ENSRNOG00000002771	5.03269	5.00737	5.00676	4.75179	5.0741	5.19417	4.72639	4.7424	4.95976	5.33327	4.84133	5.00289	5.27825	5.17583	4.50508	5.0093	4.90129
ENSRNOG00000002773	12.8958	12.793	11.9822	14.083	11.3343	11.2053	12.3498	12.4752	12.0009	11.8649	12.3317	12.231	11.7531	11.9535	12.0791	11.8329	13.8465
ENSRNOG00000002775	9.33396	9.0048	9.43695	9.43816	9.23114	9.49243	9.68927	9.6237	9.4804	9.29309	9.63704	9.30638	8.99055	9.21967	9.60975	9.83988	9.38835
ENSRNOG00000002776	5.45977	5.2182	5.45589	5.61009	5.39511	6.35997	5.35538	5.64046	5.38644	5.32499	5.40104	5.58395	5.93286	5.14997	5.67366	5.53542	5.30141
ENSRNOG00000002778	11.213	11.0519	11.1513	11.1747	11.1272	11.2299	11.2909	11.0694	11.0115	11.1029	11.0674	11.1434	10.9304	11.1714	11.2409	11.2445	11.0949
ENSRNOG00000002783	5.39043	6.14001	5.63252	5.5977	5.381	5.77594	5.67022	5.32071	5.24044	5.87166	5.5864	5.61583	5.60196	5.67853	5.34442	5.45469	5.9327
ENSRNOG00000002784	10.4191	9.65445	10.8003	10.0913	10.0917	10.0836	9.58683	9.32893	9.5743	9.62541	9.72456	10.1081	9.87601	9.96771	9.9887	9.7659	10.0588
ENSRNOG00000002790	12.0228	11.5699	11.8357	11.9662	11.4878	11.5668	11.2611	11.7343	11.5119	11.9307	11.697	11.7134	11.6504	11.6709	11.6497	11.7617	11.729
ENSRNOG00000002791	10.2731	10.5288	10.1364	10.4809	10.6463	10.4887	10.6646	10.8434	10.6499	10.0521	10.5287	10.4668	10.5259	10.4628	10.6585	10.3902	10.3598
ENSRNOG00000002792	6.14809	5.81685	6.06844	6.21643	6.42803	6.5134	6.00034	6.26287	6.1248	5.60684	5.05654	6.11345	5.69162	6.29951	5.83869	6.20275	6.13255
ENSRNOG00000002793	11.0837	11.2778	11.566	11.5079	11.4615	11.1918	11.3849	11.2994	10.916	11.4934	11.2104	11.2967	11.0361	11.4784	11.067	11.5065	11.4473
ENSRNOG00000002794	5.31316	5.87873	5.55708	5.32036	5.36894	5.43824	5.16639	5.88518	5.79035	5.54751	5.67652	5.51013	5.35301	5.84583	5.51585	5.61597	5.3524
ENSRNOG00000002797	6.96028	6.51164	6.84255	7.01564	6.62105	6.62067	6.58937	6.41319	6.58307	6.64938	6.37244	6.71903	6.60369	6.24926	7.04652	6.67447	6.72919
ENSRNOG00000002802	8.02056	8.74019	7.87403	8.39471	8.12593	8.22289	7.99282	7.99124	8.27388	7.85748	7.78804	8.19723	7.98081	8.16603	8.24987	8.24829	7.98604
ENSRNOG00000002810	9.13002	8.8381	8.73356	9.13784	8.7118	8.73465	8.97294	9.14806	8.93926	8.5676	9.21622	8.8817	8.63247	8.9597	9.05715	8.97556	8.95617
ENSRNOG00000002811	11.5563	11.42	11.5716	12.2134	10.9849	11.0191	11.4095	11.4342	11.2391	11.3665	11.4652	11.4378	11.3964	11.4351	11.3437	11.1949	11.7645
ENSRNOG00000002812	6.62606	5.34207	6.77623	5.65943	6.23224	5.57687	4.95802	5.2587	6.06182	5.44123	5.83758	5.94306	5.68033	6.06499	5.52931	5.99795	5.80136
ENSRNOG00000002813	11.5064	11.1546	11.3233	11.3819	11.3569	11.3466	11.284	11.1977	11.1757	11.1606	11.1706	11.3185	11.1766	11.1777	11.4424	11.3198	11.298
ENSRNOG00000002820	5.74704	5.33185	5.53835	5.57609	5.34916	5.60424	5.19618	5.37454	5.85407	5.62532	5.08992	5.49821	5.6982	5.34111	5.29781	5.48517	5.59133
ENSRNOG00000002821	13.4443	13.424	13.534	13.0021	13.4768	13.5552	13.5783	13.541	13.5129	13.6765	13.579	13.4608	13.5959	13.5023	13.6124	13.2612	13.4343
ENSRNOG00000002823	14.1007	14.0323	13.9045	14.1725	14.0705	14.0647	13.9527	14.0192	13.8822	13.9087	13.8596	14.0262	13.9661	13.8879	14.0366	14.0156	14.0965
ENSRNOG00000002826	11.2895	11.3215	11.9318	11.3757	11.4254	11.9649	12.0585	11.7491	11.6755	11.5867	11.5399	11.5765	11.3857	11.8062	11.6878	11.6457	11.5879
ENSRNOG00000002828	13.993	13.4005	13.74	13.6625	13.6554	13.4846	13.3822	13.3975	13.5064	13.8166	13.6991	13.6479	13.6742	13.4772	13.7438	13.7144	13.4742
ENSRNOG00000002829	5.91145	6.56226	6.07467	6.26261	5.95758	5.98782	5.86179	5.75462	5.59901	6.24389	6.15942	6.03233	6.20546	5.77082	5.55826	5.86775	6.76715
ENSRNOG00000002832	12.5886	11.3768	10.8411	12.029	11.7355	11.7978	12.1237	12.1882	12.4697	12.3116	12.4687	11.745	11.7208	11.321	12.2948	13.0173	11.4654
ENSRNOG00000002833	12.8724	12.923	12.8405	12.6855	13.1715	12.9899	13.3999	13.1771	13.0343	13.3579	13.1061	12.9681	13.1471	13.1046	12.9784	12.962	13.0119
ENSRNOG00000002839	11.4834	10.8695	11.0679	11.3397	11.4557	11.3968	11.2547	11.3041	11.1703	11.1785	11.5654	11.2473	11.1764	11.1171	11.3191	11.7944	10.9757
ENSRNOG00000002840	14.6719	14.8555	14.8316	14.8277	14.868	14.8065	14.7876	14.8846	14.8753	14.8377	14.8006	14.8081	14.6826	14.9992	14.73	15.0376	14.6543
ENSRNOG00000002841	12.4248	12.2372	12.1937	12.3302	12.3367	12.2621	12.36	12.6061	12.3528	12.6904	12.4029	12.3609	12.6439	12.4428	12.3768	12.1968	12.235
ENSRNOG00000002843	5.22448	5.51421	4.91178	5.4708	5.34621	4.72872	4.89292	5.71807	5.91442	4.90455	5.26237	5.21332	5.47245	5.31355	4.93766	5.08454	5.47521
ENSRNOG00000002851	12.9364	13.0338	13.1388	12.8628	13.2635	13.3411	13.3727	13.1422	13.207	13.1651	13.2157	13.1036	13.1327	13.1106	13.1129	13.2923	13.0854
ENSRNOG00000002858	5.04885	5.87457	5.42152	4.96846	5.69894	5.80626	5.2542	5.00148	4.94266	5.44253	5.00546	5.43025	5.51608	5.29402	5.24351	5.13436	5.45615
ENSRNOG00000002860	13.6117	13.3617	13.5687	13.5282	13.6729	13.6491	13.3518	13.3238	13.4452	13.2542	13.1951	13.5442	13.4961	13.4199	13.5893	13.4813	13.3249
ENSRNOG00000002862	6.34229	5.37734	5.79935	5.95408	5.4621	5.64209	5.93566	6.10483	5.83702	6.2678	6.12886	5.84147	6.03927	6.03832	5.91839	5.6487	5.80076
ENSRNOG00000002863	10.4386	10.8164	11.1027	10.8518	10.7868	10.4712	11.0479	11.4954	11.0598	11.6547	11.4539	10.8439	11.0511	11.1143	10.962	11.093	10.7576
ENSRNOG00000002864	12.6062	13.2253	12.6466	13.0768	12.4776	12.5369	13.5375	13.5047	13.4424	13.758	13.3935	12.8867	13.1584	13.2105	13.0422	12.9993	13.0038
ENSRNOG00000002866	7.0651	5.35149	5.76443	6.08898	4.78672	4.71881	4.99978	5.88032	5.64203	5.48654	6.26397	5.60169	5.07277	5.82539	5.74149	5.33569	6.20494
ENSRNOG00000002878	5.12683	4.94371	4.87337	5.00744	5.32345	5.29275	4.99171	4.71754	5.1143	5.08145	5.22623	5.15266	5.78208	4.78868	5.23561	5.04509	4.51966
ENSRNOG00000002879	11.3057	10.7052	11.1475	11.1069	10.9092	10.9145	11.0068	10.9317	11.0407	10.9971	10.9844	11.0154	11.0417	10.9843	11.024	10.8974	11.0819
ENSRNOG00000002884	12.0964	12.1561	12.2168	12.1408	12.0547	12.1727	12.1135	12.2134	12.1886	12.2957	12.2854	12.1469	12.1903	12.0997	12.1945	12.2327	12.1445
ENSRNOG00000002886	12.3975	12.6086	12.5817	12.4996	12.2469	12.3208	12.3611	12.2733	12.2407	12.3275	12.5124	12.4127	12.1323	12.417	12.5099	12.4327	12.5037
ENSRNOG00000002889	6.71205	6.38211	6.88683	6.76505	6.95737	7.24615	7.58125	7.37512	7.09218	7.0033	6.79318	6.90053	7.11029	7.13208	6.91287	6.78931	6.9136
ENSRNOG00000002896	14.6251	14.6278	14.5564	14.4564	14.6897	14.8156	14.7142	14.5963	14.6181	14.5455	14.6147	14.6522	14.7638	14.6554	14.6796	14.4931	14.5432
ENSRNOG00000002898	12.9326	12.573	12.7924	12.8249	12.7785	12.8345	12.543	12.5648	12.7779	12.5471	12.7091	12.7745	12.8348	12.5983	12.801	12.7958	12.5858
ENSRNOG00000002903	12.0663	11.8121	11.9595	11.6754	12.0738	12.1271	12.4378	12.4118	12.2422	12.3622	12.2058	12.0524	12.2792	12.2914	12.1864	11.8787	11.9453
ENSRNOG00000002906	5.85212	5.0848	5.15223	5.2893	5.64236	5.73026	5.39618	5.63258	5.44221	5.16328	5.63583	5.44124	5.22411	5.02876	5.96723	5.84717	5.20595
ENSRNOG00000002908	12.1752	12.2206	12.2616	11.9621	12.2927	12.3812	12.3163	12.3006	12.339	12.2265	12.4454	12.2316	12.1659	12.3109	12.314	12.4052	12.1115
ENSRNOG00000002911	7.06382	6.63006	6.94696	6.43902	7.12732	6.56123	6.56859	6.37687	6.66679	6.41044	6.24129	6.83897	6.73392	6.63106	7.41731	6.2348	6.29924
ENSRNOG00000002914	11.1414	11.2053	11.3327	11.0854	11.194	11.2321	11.2294	11.2771	11.2121	11.1463	11.3147	11.1959	11.1355	11.2557	11.1813	11.1793	11.314
ENSRNOG00000002916	12.0014	12.3926	12.3666	12.3752	12.2722	12.2499	12.3277	12.3799	12.442	11.9935	12.2228	12.3172	12.2029	12.4744	12.5199	12.2701	11.9326
ENSRNOG00000002918	5.48497	5.45159	6.18329	4.96022	6.14943	5.93496	6.36953	6.13042	6.01563	6.95298	6.47394	5.74859	5.72598	6.00124	5.8456	6.61783	5.70128
ENSRNOG00000002919	14.4488	14.4185	14.691	14.3777	14.3804	14.2936	14.3331	14.5413	14.5453	14.6684	14.6963	14.4763	14.7598	14.4011	14.5153	14.2346	14.5326
ENSRNOG00000002921	4.91362	5.10097	5.21229	5.16483	4.89187	4.65399	5.03459	5.53055	5.04659	5.05732	5.41822	4.9764	4.62774	4.78867	5.43359	5.18571	5.36006
ENSRNOG00000002922	10.6103	10.6306	10.6254	10.6164	10.7185	10.7689	10.6754	10.716	10.7334	10.4152	10.892	10.7026	10.7409	10.7555	10.8569	10.7237	10.3053
ENSRNOG00000002925	6.63421	5.55758	6.03193	5.58225	6.32522	6.5797	5.99486	6.27284	6.13035	6.11226	6.19347	6.09498	5.804	6.26266	6.0773	6.59137	5.88752
ENSRNOG00000002928	13.9857	14.0733	14.078	14.034	13.8886	14.0045	13.9518	13.8954	14.0212	14.0029	14.072	14.0169	13.7677	14.1648	14.1556	14.2593	13.6657
ENSRNOG00000002934	15.1389	15.277	15.1777	15.2832	15.1769	15.0772	15.2	15.1318	15.2359	15.1653	15.1812	15.1695	15.1656	15.1497	15.0789	15.2039	15.3216
ENSRNOG00000002937	7.16506	6.5829	6.39495	7.38189	6.66983	6.42712	7.29458	7.30238	6.87109	7.18246	7.42241	6.85444	7.41913	6.78495	6.86407	6.59958	7.12281
ENSRNOG00000002941	12.3884	12.6062	12.5808	12.596	12.5644	12.625	12.9598	12.9658	12.7129	12.8112	12.7982	12.605	12.7109	12.6669	12.7068	12.5954	12.7265
ENSRNOG00000002946	7.23108	6.49567	7.33714	6.997	7.49096	7.63993	7.70479	7.35786	7.37157	7.06227	7.3888	7.21251	7.31453	7.27047	7.13579	7.49017	7.14738
ENSRNOG00000002948	6.1701	6.18734	6.04637	6.4006	5.5802	5.37828	6.24694	7.23262	6.7172	7.32957	6.53868	6.16756	6.58227	7.40241	5.76046	5.89812	5.98843
ENSRNOG00000002950	6.57096	5.68442	6.36959	6.33098	6.277	6.40915	6.21737	6.24141	6.33422	6.14776	6.36961	6.29311	6.40248	5.89018	6.70318	6.40248	5.95852
ENSRNOG00000002953	8.04801	8.04372	8.06982	7.98889	8.37281	8.07232	7.78904	7.90708	7.91759	8.28169	7.97314	8.05852	8.28376	7.59844	8.04894	8.16045	8.12918
ENSRNOG00000002964	8.95119	7.27349	7.34375	7.93544	7.64764	8.14231	7.09455	7.05108	8.04771	7.81786	7.3766	7.78779	7.32499	6.61501	8.85627	8.88503	6.86402
ENSRNOG00000002968	6.45274	5.46038	6.19224	6.15999	6.03956	5.85051	6.26961	5.67723	5.84323	5.59251	6.53452	6.0736	5.73869	6.49856	6.26971	6.28207	5.28415
ENSRNOG00000002969	9.64135	9.58148	9.15916	9.74504	9.13703	9.20256	9.76013	9.62387	9.92427	10.2385	9.78338	9.45838	9.56678	9.2229	9.8691	9.92866	9.40631
ENSRNOG00000002978	7.35715	7.33795	7.42122	7.17813	7.51771	7.6986	7.01531	7.74049	7.1642	7.29411	6.91884	7.40332	7.39518	7.16494	7.559	7.08026	7.5001
ENSRNOG00000002983	14.1405	14.3864	14.2716	14.2323	14.3798	14.3507	14.4668	14.5042	14.3652	14.1747	14.4386	14.3081	14.2481	14.3287	14.4352	14.3321	14.3251
ENSRNOG00000002984	8.04197	8.53169	8.17536	7.43109	9.11254	8.98393	8.86082	8.81397	8.94035	8.67299	9.13042	8.55297	8.9241	8.83067	8.94536	8.89036	7.41935
ENSRNOG00000002989	11.9636	12.1755	12.3901	12.0194	12.0274	12.2985	12.2211	12.2275	12.3421	12.2008	12.3435	12.1642	12.1839	12.2217	12.1974	12.2297	12.1496
ENSRNOG00000002991	12.6104	12.6509	12.6223	12.7833	12.6061	12.7195	12.8722	12.9625	12.7955	12.7303	12.8229	12.6843	12.6813	12.7301	12.7544	12.7797	12.7356
ENSRNOG00000002997	12.4937	12.1498	12.3812	12.2753	11.9411	12.0658	12.1153	12.3655	12.4093	12.3896	12.3257	12.2117	12.0709	12.1304	12.3967	12.2557	12.4382
ENSRNOG00000002999	12.7455	12.5917	12.7278	12.6066	12.6223	12.7043	12.4987	12.5811	12.5028	12.6087	12.684	12.6619	12.5335	12.6992	12.7265	12.7105	12.4768
ENSRNOG00000003020	5.70542	5.30426	5.71804	5.8704	6.20627	6.14253	6.27333	6.1377	6.15288	5.48983	5.35934	5.82582	5.82733	5.82953	5.82865	5.98024	5.77374
ENSRNOG00000003026	12.2836	11.7038	12.1735	11.7594	12.2691	12.3098	12.3472	12.1504	12.0562	12.2169	12.2552	12.0823	12.0854	12.1043	12.0521	12.2041	12.2135
ENSRNOG00000003029	14.8741	14.8637	14.8164	14.806	14.8113	14.8409	14.7896	14.8286	14.8113	14.8513	14.8765	14.8291	14.762	14.8139	14.8734	14.8991	14.817
ENSRNOG00000003031	11.1137	12.0911	10.6828	13.7377	9.84415	10.0688	11.9143	12.49	12.2349	11.3508	11.5336	11.2758	11.8934	10.9502	11.1008	10.5621	13.0839
ENSRNOG00000003038	9.50136	8.29473	8.39332	8.77146	9.20325	8.75716	8.7337	8.61088	8.88616	9.08061	9.27783	8.80028	8.73011	8.45112	9.09998	9.76228	8.24086
ENSRNOG00000003049	12.6565	12.7061	12.6779	12.565	13.0384	13.1264	13.0769	12.9109	12.9072	12.6881	12.8461	12.8105	12.8535	12.7894	12.8811	12.9621	12.68
ENSRNOG00000003063	11.725	11.5802	11.8249	11.4641	11.7769	11.9895	11.6069	11.9192	11.728	11.6649	11.872	11.7644	11.6866	12.0851	11.7478	11.8539	11.3459
ENSRNOG00000003064	6.35669	5.43855	6.05422	5.71827	5.63204	6.34272	5.91074	6.28868	6.34248	5.97895	6.46515	5.96814	5.73248	5.74161	6.69671	6.52299	5.49849
ENSRNOG00000003065	12.9756	13.0544	12.9692	13.1473	12.9915	12.8679	13.2699	13.1829	13.1488	13.2012	13.252	13.0057	12.9872	13.1088	12.9497	13.1995	13.1825
ENSRNOG00000003067	5.70193	4.97859	5.02833	4.75976	5.35957	5.81503	5.65022	4.94247	4.88312	5.29661	5.99616	5.3086	5.84663	4.93003	5.35752	5.02233	5.39336
ENSRNOG00000003069	11.5987	11.2748	11.6417	11.3586	11.1314	11.2493	11.1609	10.9882	11.2543	11.0726	11.2183	11.4294	11.4058	11.6444	11.56	10.8709	10.956
ENSRNOG00000003070	9.85265	9.85419	10.2185	9.67162	10.4273	10.2801	10.4237	10.3155	10.2469	10.0547	9.96442	10.0423	9.92718	10.0208	10.1279	10.2109	10.2624
ENSRNOG00000003075	11.7322	11.2311	11.4009	11.5971	11.3477	11.1714	10.9153	11.2098	11.3509	11.4844	11.4909	11.3863	11.2848	11.1843	11.5276	11.7395	11.0682
ENSRNOG00000003076	13.5427	13.1406	13.2181	13.3181	13.1865	12.9336	12.9499	13.0136	13.1816	13.4285	13.2453	13.1794	13.1294	12.9688	13.1766	13.3724	13.3238
ENSRNOG00000003081	11.2698	10.4812	11.3144	10.752	11.0567	10.9215	10.4701	10.7542	10.906	11.0604	11.1027	11.0073	11.2833	10.9831	11.0038	10.8833	10.4864
ENSRNOG00000003084	12.574	12.4843	12.5436	12.4148	12.6682	12.6856	12.7144	12.6152	12.5299	12.5797	12.6264	12.5778	12.5835	12.6567	12.5897	12.5778	12.5134
ENSRNOG00000003085	4.65561	4.97601	5.05077	5.29031	5.29019	5.15945	5.60395	5.44122	5.44233	5.2342	5.44377	5.19787	5.86987	4.95763	5.53097	5.0344	4.76097
ENSRNOG00000003094	5.27471	5.02345	5.24753	5.21407	5.00846	5.29429	5.54177	5.29835	5.19097	5.09424	4.84897	5.21242	4.89144	5.44154	5.51626	5.0298	5.06314
ENSRNOG00000003095	8.15365	7.14395	7.43889	7.17619	7.3919	7.55091	7.042	6.92243	7.35357	7.66709	7.19166	7.49489	8.01833	7.16918	7.41099	6.89805	7.41327
ENSRNOG00000003098	11.6914	11.7429	11.5373	11.7369	11.6787	11.5268	11.4124	11.4523	11.779	11.0872	11.4689	11.6564	11.7655	11.5405	11.688	11.3289	11.5164
ENSRNOG00000003100	8.83723	8.54763	8.69878	8.97104	8.82911	8.98996	8.99327	9.08819	8.95532	8.57577	9.13037	8.82995	8.74345	9.11398	8.7384	9.19344	8.55539
ENSRNOG00000003104	10.8611	10.5704	10.6092	11.3217	10.2716	10.2297	10.9415	10.7242	10.7089	9.98053	10.4047	10.6157	10.2444	10.5935	10.8398	10.2696	11.0716
ENSRNOG00000003108	11.9933	12.1599	12.3309	11.9891	12.2081	12.4102	12.2142	12.0615	12.4385	12.0246	12.3627	12.1718	12.1411	12.1775	12.1363	12.4836	12.0418
ENSRNOG00000003114	10.8122	10.5459	10.6495	10.5571	11.0699	10.9022	10.7474	10.9367	10.783	10.6514	11.0232	10.7088	10.6008	10.5214	10.7199	11.1982	10.8564
ENSRNOG00000003117	12.9956	12.8539	12.9389	12.902	12.7019	12.9453	12.8847	12.8084	12.854	12.7066	12.9177	12.8832	12.7729	12.9363	12.9022	12.8043	12.9178
ENSRNOG00000003119	6.11281	5.96221	6.06699	5.96996	5.83581	6.14292	6.19138	5.79368	6.12649	5.76202	6.27971	6.04708	6.0431	6.16393	6.12596	5.99506	5.7978
ENSRNOG00000003120	13.7098	12.9088	13.0358	13.0024	13.4136	13.1366	12.9387	13.1304	13.4951	13.5719	13.8287	13.2396	13.337	13.0766	13.5361	13.9384	12.5244
ENSRNOG00000003121	12.8423	12.9235	12.7163	12.4419	12.7116	12.8675	13.1409	13.2592	13.2877	12.9005	13.3348	12.7841	12.5251	12.9781	13.0508	13.1621	12.9249
ENSRNOG00000003123	7.51264	8.31765	7.92494	7.99798	7.59652	7.95825	7.76041	7.88057	7.77037	7.86242	7.59734	7.86152	7.58267	7.97427	7.8887	7.87318	7.86972
ENSRNOG00000003125	14.0491	13.7277	13.9878	13.8229	13.7407	13.8275	13.7827	13.7415	13.7866	13.7802	13.996	13.8457	13.7132	13.8788	13.8636	13.882	13.8669
ENSRNOG00000003127	11.1126	10.8466	11.2239	11.0793	11.1219	11.2455	11.2715	10.9458	10.9965	10.7562	11.0422	11.1004	10.7837	11.2616	11.2285	11.2412	10.8021
ENSRNOG00000003134	13.0571	12.7778	13.1438	12.9635	12.8935	12.8364	12.6508	12.7598	12.9541	12.5796	12.8483	12.9639	13.0094	12.9794	13.0144	12.6656	12.6954
ENSRNOG00000003139	13.1702	13.1562	13.222	13.1072	13.1944	13.4143	13.2441	13.167	13.1323	13.1581	13.1987	13.1945	13.1652	13.1145	13.2065	13.2516	13.2447
ENSRNOG00000003147	14.2698	14.3225	14.4017	14.2602	14.3175	14.3845	14.5258	14.6019	14.6189	14.5444	14.579	14.3547	14.5076	14.3117	14.4166	14.4083	14.4991
ENSRNOG00000003148	13.7844	13.6636	13.4974	14.2908	13.6664	13.4131	13.8501	13.637	13.6295	13.1721	13.8995	13.6716	13.635	13.3336	13.7597	13.7034	13.9728
ENSRNOG00000003149	13.1258	13.1062	13.1274	13.1045	13.0447	13.0742	12.9958	13.0227	13.0241	13.0329	13.2895	13.0835	12.998	13.1146	13.0557	13.2261	13.0346
ENSRNOG00000003150	13.0956	12.8792	13.0043	13.0941	13.0713	13.0089	12.9898	12.823	12.8818	12.7373	12.8393	12.99	12.8593	12.9357	12.9613	12.9995	13.008
ENSRNOG00000003151	12.4389	12.288	12.3978	12.3493	12.5544	12.491	12.454	12.3793	12.3784	12.3285	12.3169	12.3854	12.2831	12.4369	12.2293	12.5389	12.4936
ENSRNOG00000003163	13.9407	13.8185	13.8851	13.821	13.8224	13.8641	13.6873	13.9073	14.0677	13.7529	14.0249	13.8569	13.8626	13.8361	13.8617	13.9964	13.7941
ENSRNOG00000003164	5.8814	6.09993	6.10627	5.81292	6.67064	6.43655	5.92054	6.00315	6.23329	5.87034	5.61649	6.0777	6.09825	5.84833	5.74495	6.31245	6.30325
ENSRNOG00000003171	5.18477	4.83204	5.06505	4.75952	4.62355	4.94355	4.44856	4.71977	4.88419	4.93227	5.16146	4.89788	4.9238	4.98697	4.76162	4.918	4.77022
ENSRNOG00000003172	11.2448	11.4446	11.2047	11.6718	11.1899	10.9328	10.8807	11.0036	11.1403	11.4429	11.6463	11.2543	11.7106	11.1312	10.7585	11.2941	11.3791
ENSRNOG00000003177	12.0665	12.4173	12.1199	12.4856	12.5003	12.5688	12.6423	12.5011	12.3212	12.3606	12.4789	12.3173	12.2564	12.3852	12.0558	12.8008	12.4772
ENSRNOG00000003178	12.7223	12.569	12.8883	12.5365	12.9816	13.1073	13.0741	12.5786	12.7167	12.7086	12.686	12.7842	12.7843	12.6823	12.7862	12.8385	12.8068
ENSRNOG00000003183	12.8069	10.4753	10.4704	10.6453	11.0502	10.7506	10.0084	10.03	11.546	10.9012	12.7945	11.0196	10.7465	9.85691	12.3744	12.7576	9.46778
ENSRNOG00000003185	12.4166	12.0751	12.1825	12.2829	12.2488	12.0963	12.2979	12.1828	12.1433	12.2339	12.2112	12.2375	12.2682	12.2784	12.2887	12.0948	12.1609
ENSRNOG00000003186	11.534	11.5503	11.6093	11.579	11.6748	11.6371	11.7722	11.699	11.7298	11.3941	11.5291	11.6057	11.5388	11.5896	11.7389	11.564	11.6156
ENSRNOG00000003189	10.4538	9.79652	10.4348	10.4822	9.60512	9.89116	9.26616	9.59437	9.43239	9.42666	9.90589	10.015	10.0202	10.1151	9.33574	9.41358	10.44
ENSRNOG00000003191	11.833	11.7048	11.8501	11.805	11.5151	11.6202	11.356	11.7744	11.6843	11.5711	11.7492	11.698	11.5372	11.801	11.6153	11.7016	11.749
ENSRNOG00000003195	10.7132	11.4429	10.6619	11.3936	10.2579	10.5976	11.6313	11.6392	11.4723	11.4399	11.5035	10.9686	11.2091	11.292	11.1496	10.742	11.2898
ENSRNOG00000003198	12.6925	12.5431	12.5769	12.907	12.4071	12.6059	12.7491	12.8192	12.6211	12.2986	12.6022	12.5874	12.3496	12.6044	12.6	12.5981	12.9294
ENSRNOG00000003203	13.6071	13.331	13.4768	13.3196	13.5505	13.5027	13.3024	13.2302	13.3969	13.3777	13.3113	13.4317	13.3061	13.3635	13.4275	13.5627	13.3616
ENSRNOG00000003206	14.5053	14.5648	14.5285	14.4896	14.7225	14.7775	14.6783	14.539	14.6052	14.7258	14.627	14.6033	14.6886	14.5111	14.6418	14.7949	14.4309
ENSRNOG00000003210	5.79544	5.45747	6.17181	6.15265	5.98218	5.78973	5.68784	5.89328	5.61398	5.60321	5.45827	5.79246	5.6164	5.56567	5.60079	5.85826	6.2767
ENSRNOG00000003217	14.8373	13.1824	13.3587	13.7901	13.9261	13.8593	13.3083	13.0769	13.681	13.6074	14.4945	13.7312	13.4915	12.7818	14.3541	14.9106	13.1495
ENSRNOG00000003221	6.84388	5.92122	6.7129	6.03091	7.44843	6.08185	5.69761	6.25831	5.37591	6.43171	7.23818	6.5306	7.0872	5.96038	6.68863	6.11567	6.08285
ENSRNOG00000003223	13.9559	13.3902	13.7285	13.6611	13.71	13.407	13.5083	13.6311	13.7423	14.0279	13.4988	13.6347	13.7611	13.4167	13.6822	13.6355	13.7898
ENSRNOG00000003226	13.9306	13.9075	14.0566	13.8663	14.0201	14.0158	13.9657	13.9071	13.975	13.8995	14.0707	13.9882	14.0396	13.9199	14.1371	13.957	13.7852
ENSRNOG00000003228	13.195	12.9593	12.8193	12.7706	12.8514	12.9434	13.0212	13.1036	13.1322	13.3397	13.2736	12.9779	13.2316	13.064	12.9661	12.9067	12.9821
ENSRNOG00000003232	14.3794	14.1981	14.2621	14.1626	14.1273	14.1924	13.9648	14.1543	14.2878	14.0764	14.2035	14.2331	14.2036	14.2688	14.3032	14.1362	14.0316
ENSRNOG00000003233	6.13738	5.99079	5.78699	6.12369	5.73944	5.70375	5.65719	5.66521	5.78636	5.57964	5.38987	5.95257	5.75266	6.54544	5.79297	5.527	5.37759
ENSRNOG00000003234	14.002	14.0689	14.1531	14.1381	14.161	14.1902	14.2381	14.1936	14.1284	14.1374	14.1662	14.1191	14.0858	14.1597	14.1129	14.2524	14.0915
ENSRNOG00000003239	10.659	10.5266	10.7315	10.5883	10.6851	10.7681	10.8802	11.1189	11.0102	10.9376	10.9001	10.7062	10.7075	10.7855	10.9042	10.9421	10.6065
ENSRNOG00000003241	13.1596	13.3614	13.4012	13.3796	13.1312	13.3001	13.2786	13.514	13.3481	13.5219	13.4597	13.2907	13.2864	13.2858	13.3106	13.4283	13.4054
ENSRNOG00000003242	9.80574	8.33445	8.8032	8.76018	9.46341	9.56069	8.87021	8.78713	9.17668	9.1431	9.43036	9.08279	8.78384	8.96045	9.27312	10.3296	8.1567
ENSRNOG00000003244	6.06819	5.34086	6.12628	6.47479	5.85022	5.79075	6.26632	5.9931	6.11424	5.34505	6.47301	5.9609	5.97199	6.11764	5.90733	6.12331	5.79338
ENSRNOG00000003245	6.00789	6.65621	6.38286	5.9875	6.11103	6.14396	6.11548	6.13223	6.62232	6.01776	6.23454	6.22685	6.12082	6.16772	6.46368	6.12232	6.22628
ENSRNOG00000003247	11.539	11.3267	11.3248	11.4301	11.3588	11.389	11.6778	11.5385	11.6385	11.875	11.4738	11.4387	11.59	11.5239	11.4658	11.5219	11.3904
ENSRNOG00000003248	13.6762	13.3762	13.5851	13.4887	13.8889	13.7851	13.789	13.7057	13.698	13.8851	13.6704	13.6616	13.8551	13.6847	13.6144	13.8063	13.4558
ENSRNOG00000003253	14.5728	13.95	14.4983	14.1811	14.1729	14.1295	14.2363	14.2489	14.263	14.6832	14.3469	14.2762	14.5959	14.3296	14.0556	13.9781	14.5197
ENSRNOG00000003254	8.53854	8.67315	8.58132	8.73427	9.11554	9.04093	9.04735	8.86724	8.5241	8.64259	8.22972	8.74619	8.71536	8.65165	8.66494	8.67238	8.9413
ENSRNOG00000003256	12.9297	13.0507	12.93	13.0325	13.2018	13.2966	13.0752	13.1839	13.0303	12.9002	13.2644	13.0681	13.0965	13.104	12.9714	13.2983	12.9287
ENSRNOG00000003258	13.3123	13.1406	13.185	13.2206	13.4288	13.3297	13.2788	13.1702	13.1031	13.2868	13.0742	13.2481	13.2936	13.1922	13.1305	13.2367	13.3078
ENSRNOG00000003259	9.23763	8.63389	9.41182	9.26984	8.5104	8.7984	9.07479	9.19909	9.25386	8.60135	9.53196	8.94256	8.51293	8.99538	9.11278	9.2207	9.33297
ENSRNOG00000003260	13.2246	13.1948	13.1911	13.4191	12.9528	13.0338	13.0127	13.0766	13.0066	12.8254	13.0718	13.1553	12.9902	13.1618	13.2299	12.9777	13.1373
ENSRNOG00000003262	13.0558	12.7445	12.9222	12.8666	12.8131	12.7427	12.7016	12.9841	12.9827	13.1798	12.9783	12.8859	13.0929	12.8686	12.8668	12.8361	12.8557
ENSRNOG00000003267	10.7682	10.2935	10.8204	10.3367	10.5587	10.6195	10.4167	10.262	10.5173	10.399	10.5346	10.5094	10.2559	10.5851	10.3471	10.703	10.6251
ENSRNOG00000003269	13.7742	13.1994	13.2216	13.3367	13.4874	13.406	12.956	12.6839	13.0784	13.1766	13.2562	13.3203	13.1194	12.9246	13.4135	13.7195	13.0458
ENSRNOG00000003273	7.94552	7.84593	8.19269	8.19202	8.66652	8.57532	8.79962	8.50867	8.30376	8.178	7.72844	8.24151	8.43566	8.0525	8.26744	8.13041	8.43349
ENSRNOG00000003275	7.00746	7.76172	7.02871	7.73755	6.89451	6.78523	7.32151	7.47555	7.10596	7.25128	7.39415	7.20319	6.99161	7.82142	6.80051	7.15289	7.46093
ENSRNOG00000003276	12.2039	11.3647	11.6845	11.5578	11.6736	11.7035	11.7431	11.8656	11.7982	12.7784	11.8377	11.7871	12.2611	11.8537	11.7815	11.7185	11.5419
ENSRNOG00000003280	10.8526	10.8983	10.896	10.8992	10.6958	10.7915	10.8362	10.9157	10.9869	10.9952	11.1051	10.8681	11.0396	10.9733	10.7669	10.8324	10.8577
ENSRNOG00000003284	10.1752	8.57421	9.18193	9.54505	8.78995	8.94396	8.31927	8.53375	9.30041	8.97797	9.409	9.06217	8.55323	8.37376	9.42219	10.1377	8.85074
ENSRNOG00000003288	11.4947	10.095	11.1322	10.2829	10.7315	11.0184	10.1272	10.3815	10.5067	10.4531	10.6436	10.8641	11.201	11.0997	10.7218	10.0341	10.2086
ENSRNOG00000003289	13.4921	12.9937	13.3696	13.0651	13.4345	13.3483	13.3068	13.3022	13.2185	13.5932	13.3705	13.3298	13.6135	13.4051	13.2463	13.1507	13.18
ENSRNOG00000003296	10.9581	10.8008	11.0049	11.4542	10.5726	10.4743	10.7068	10.7684	10.7428	10.9248	10.6484	10.851	10.9433	10.6997	10.7508	10.5917	11.1475
ENSRNOG00000003298	6.48541	5.56089	6.27102	5.61252	5.95489	6.70842	6.2016	6.24562	6.65888	5.83248	5.91954	6.0895	5.71372	5.95223	6.5464	6.42831	5.99356
ENSRNOG00000003300	11.6105	11.0541	10.9932	11.5138	10.8036	10.5239	10.5382	11.1153	11.1324	10.5502	10.3838	10.9791	10.2344	11.0819	10.9968	10.9773	11.3847
ENSRNOG00000003302	11.9642	11.9038	12.0218	11.7521	12.2269	12.1539	12.1954	12.2637	12.195	12.2672	12.2581	12.0245	12.1406	12.0997	11.9573	12.2416	12.0564
ENSRNOG00000003304	8.11627	7.54317	7.67662	7.52895	6.86934	6.73948	6.8956	7.2882	8.0989	7.41965	6.94366	7.42486	7.25252	7.41006	7.68733	6.86947	7.68348
ENSRNOG00000003305	7.24173	6.95227	6.64636	6.27637	6.73498	6.94082	6.92015	6.58738	6.31354	6.95867	7.1726	6.80035	6.86433	6.53721	7.00907	6.35484	7.21271
ENSRNOG00000003313	10.0314	9.49232	10.106	10.0941	9.27958	9.61401	10.2825	10.1491	9.90785	10.3827	10.2652	9.81957	9.5142	10.3568	9.88765	10.1152	9.85978
ENSRNOG00000003328	14.0585	14.0411	14.0591	13.771	13.8955	13.8995	13.9114	14.0924	14.201	14.1579	14.2728	13.9698	13.898	14.1771	13.9286	14.1435	13.9788
ENSRNOG00000003330	11.7083	11.9188	11.8611	12.0651	11.7827	11.6852	11.823	11.8961	11.7542	11.6402	11.8086	11.8563	11.8213	11.93	11.9344	11.68	11.7254
ENSRNOG00000003336	12.5788	12.2831	12.6036	12.134	12.4136	12.386	12.3357	12.4447	12.5496	12.6074	12.462	12.4335	12.4526	12.6008	12.4491	12.354	12.3231
ENSRNOG00000003338	12.8223	12.1949	13.0098	12.0916	13.0953	12.9293	12.8501	12.6358	12.5933	13.0946	12.8808	12.7416	13.074	12.8543	12.6033	12.6285	12.564
ENSRNOG00000003343	14.603	14.6373	14.5803	14.7525	14.7009	14.726	14.6832	14.7587	14.6708	14.784	14.5933	14.6633	14.6925	14.58	14.6973	14.8043	14.6199
ENSRNOG00000003347	5.40315	6.29918	6.03937	5.68697	5.7468	5.76405	5.99415	5.64678	5.61408	6.05558	6.34493	5.86709	6.25122	5.80764	5.80547	5.47002	6.02393
ENSRNOG00000003357	11.2883	9.49836	11.1032	10.6266	10.3737	10.1119	9.48571	9.21998	10.512	10.5803	12.714	10.5395	11.5974	9.79053	10.4654	11.3312	9.34471
ENSRNOG00000003359	12.8456	12.7711	12.946	13.0108	12.7368	12.5973	12.7496	13.3814	13.1387	13.2785	13.2473	12.8699	13.0518	13.0267	12.8431	13.0243	12.8572
ENSRNOG00000003365	12.9117	13.3821	13.0709	13.3739	12.8887	13.0671	13.7455	13.6262	13.6437	13.5853	13.3891	13.1832	13.2367	13.3844	13.333	13.3106	13.3189
ENSRNOG00000003370	8.81127	6.61088	7.50088	7.64404	7.74488	7.70804	7.29144	7.25459	7.88918	7.41492	7.96435	7.62925	6.70985	7.4207	8.51272	9.17348	6.2946
ENSRNOG00000003385	13.148	13.1078	13.2208	13.1233	13.261	13.1788	13.2664	12.8999	12.8338	13.009	12.9332	13.1526	13.0339	13.1365	13.1633	12.9735	13.1772
ENSRNOG00000003397	11.8361	11.6315	11.8108	11.7392	11.6644	11.6357	11.5981	11.6003	11.6716	11.4069	11.7367	11.7016	11.5171	11.7523	11.7271	11.6855	11.6715
ENSRNOG00000003398	11.4821	11.7143	11.172	12.0205	11.1332	11.0609	11.6609	12.4887	12.0231	12.1675	11.2716	11.4907	11.6006	11.7244	11.5083	11.3946	11.9445
ENSRNOG00000003399	14.1993	13.9678	14.0993	14.2067	14.2415	14.1149	14.0156	14.0212	13.8956	14.0558	13.9497	14.1093	14.1335	14.0192	14.0018	14.0674	14.1506
ENSRNOG00000003400	8.85996	8.68708	8.75514	8.74071	9.02228	8.8654	8.91292	8.59363	8.50083	8.88373	8.71993	8.87965	9.11079	8.99855	8.87691	8.5573	8.40088
ENSRNOG00000003402	12.9736	13.0645	13.1828	12.8034	13.3045	13.3073	13.3429	12.9877	13.1076	13.3261	13.1334	13.1435	13.2763	13.2257	13.1528	13.1499	12.895
ENSRNOG00000003424	12.1285	12.1325	12.1987	12.1049	12.1874	12.2412	12.2756	12.1724	12.1574	11.9882	12.0813	12.1409	11.9666	12.1059	12.2025	12.1829	12.2938
ENSRNOG00000003428	13.3912	13.3073	13.4136	13.3976	13.3626	13.4079	13.5689	13.6264	13.5098	13.5795	13.552	13.4039	13.5269	13.3635	13.4646	13.3974	13.5367
ENSRNOG00000003439	7.93937	6.68048	7.41746	7.73939	7.46817	7.57017	7.1256	7.23567	7.24344	7.4114	7.58288	7.46334	7.53154	7.0309	7.79259	7.90364	6.78494
ENSRNOG00000003442	11.9607	12.3676	11.8193	12.359	11.5828	11.75	12.7492	13.2211	12.9324	13.2175	12.7668	12.1356	12.5704	12.5244	12.2861	12.2017	12.3891
ENSRNOG00000003453	12.8811	13.0233	12.7013	13.3262	12.1273	12.164	13.0925	13.0747	12.7208	12.424	13.1548	12.7075	12.6214	12.6889	12.8342	12.1027	13.6532
ENSRNOG00000003456	5.56375	5.66598	5.22908	5.09519	5.21672	5.42668	5.39404	5.04616	4.97828	5.39479	5.32629	5.30736	4.71747	5.71063	5.14077	5.50864	5.44171
ENSRNOG00000003468	5.42854	5.56761	5.03553	5.15004	5.0183	4.94339	4.71229	5.41548	5.14589	5.4161	5.21504	5.20388	5.19019	5.22873	5.27255	4.96082	5.2893
ENSRNOG00000003469	11.8147	11.961	12.0648	12.1383	11.7819	11.8042	12.3529	12.3476	12.1762	11.7145	12.2769	11.9512	11.7867	12.1919	12.0174	11.9126	12.2353
ENSRNOG00000003470	10.9013	10.7712	10.8548	10.7228	10.7522	10.9079	10.8424	10.8076	10.8391	10.5797	10.8336	10.7875	10.4971	10.8509	10.8291	10.9281	10.8923
ENSRNOG00000003476	5.23984	5.70827	5.5585	5.12116	5.33846	5.01018	5.03307	5.22246	5.52837	5.84637	5.57141	5.30965	5.16188	4.97305	5.6755	5.70669	5.3399
ENSRNOG00000003486	5.08078	4.47709	4.54678	4.27609	4.59803	4.59803	4.56371	4.59768	4.38858	4.56409	5.08659	4.61569	4.15832	4.86258	4.94348	4.8884	4.22763
ENSRNOG00000003497	10.5878	9.92337	10.2655	9.75761	10.1207	10.2434	10.2952	10.1669	10.3896	10.4113	10.1813	10.1414	9.91538	10.043	10.4161	10.308	10.3394
ENSRNOG00000003498	4.2749	4.4497	4.39761	4.19438	4.119	3.9666	4.04288	4.18675	4.27349	4.11772	4.56046	4.25904	4.35489	4.51294	4.06133	3.94698	4.31268
ENSRNOG00000003500	5.72701	5.93126	5.86371	5.35616	5.99548	6.04316	5.61618	5.78438	5.50826	5.74023	5.3628	5.79486	5.61715	5.48718	6.1326	5.53542	5.87602
ENSRNOG00000003504	12.3478	12.1117	12.1544	12.3853	12.0526	11.9322	11.9452	12.0294	12.1289	11.8923	12.0576	12.135	11.9208	12.1558	12.1544	12.1671	12.098
ENSRNOG00000003506	12.4393	12.5831	12.6493	12.2378	12.32	12.5554	12.2954	12.023	12.2403	12.3832	12.4389	12.4562	12.2278	12.4846	12.609	12.464	12.1545
ENSRNOG00000003509	5.60208	5.4802	5.34208	5.58253	5.50941	5.3409	5.67599	6.2559	6.33971	6.01253	5.59008	5.57505	5.82911	6.11888	5.37022	5.68351	5.43587
ENSRNOG00000003510	9.30727	6.70801	8.14008	6.98824	7.86814	8.33566	7.9246	6.69061	7.79614	8.5404	9.26389	7.77647	8.00808	7.10871	7.52405	8.86977	8.18048
ENSRNOG00000003512	13.7534	13.6274	13.6786	13.9124	13.3568	13.473	13.5527	13.9696	13.6752	13.9324	13.9447	13.6056	13.6521	13.5652	13.4315	13.7341	14.1309
ENSRNOG00000003515	13.3944	12.5257	12.7475	12.6994	13.0617	13.1371	12.6586	12.4356	13.0208	12.7777	13.2042	12.891	12.7824	12.6057	13.065	13.6099	12.3368
ENSRNOG00000003518	5.77153	6.30578	5.82423	6.10038	5.46977	5.5892	5.51587	5.60316	5.69868	5.88823	6.2581	5.85466	6.12348	6.07395	5.43358	5.61277	5.87898
ENSRNOG00000003520	14.8778	14.7426	14.896	14.7937	14.9938	14.9842	14.9652	14.9418	14.8827	14.7802	14.9297	14.8766	14.864	14.7616	14.9757	14.9359	14.9039
ENSRNOG00000003521	4.92165	5.12358	5.07295	5.32922	4.57869	4.64799	4.76593	4.7603	4.96552	4.75546	4.9767	4.93296	4.9418	5.22904	4.55171	4.72577	5.07066
ENSRNOG00000003524	13.4457	13.0873	13.1415	13.2648	13.2252	13.2416	13.3135	13.2987	13.2042	13.1321	13.2117	13.2112	13.0234	13.2097	13.2614	13.3142	13.3446
ENSRNOG00000003526	7.72519	7.51716	7.52728	7.37221	7.55081	7.53129	7.42294	7.67823	7.94345	7.05733	7.52895	7.61243	7.63587	8.50585	7.14616	7.2512	7.17031
ENSRNOG00000003532	4.89709	5.27062	5.49139	4.86579	5.28576	5.56861	5.62433	4.98697	4.97112	5.10375	5.27138	5.23498	5.5405	5.24266	4.95241	4.68517	5.65496
ENSRNOG00000003533	13.079	12.8248	13.0908	12.8847	12.9817	13.0594	13.4712	13.4296	13.3109	13.5092	13.2927	13.0513	13.1686	13.2145	13.1582	13.117	13.1461
ENSRNOG00000003537	8.35203	6.73228	8.65227	7.41657	7.45345	7.46489	7.06429	7.55624	7.54656	7.69085	7.96796	7.79204	8.07238	8.3614	7.62312	7.02576	7.15152
ENSRNOG00000003541	11.8751	11.5319	11.8197	11.7256	11.6888	11.672	11.619	11.6417	11.5386	11.6446	11.5445	11.7216	11.5921	11.808	11.7811	11.5901	11.5823
ENSRNOG00000003545	12.1937	12.0955	12.2829	12.3752	12.2419	12.3085	12.3295	12.069	12.1114	11.8299	12.0934	12.2116	12.0681	12.1796	12.1592	12.2045	12.2879
ENSRNOG00000003546	10.3782	9.1799	9.58324	9.01592	9.20315	9.31539	8.81374	8.45745	9.48514	8.92249	9.15386	9.35714	8.62184	9.33019	9.58646	9.61358	9.06559
ENSRNOG00000003549	13.7386	13.5569	13.7844	13.6096	13.6847	13.5766	13.6532	13.6208	13.7623	13.8642	13.8682	13.6639	13.6544	13.7072	13.6628	13.889	13.5727
ENSRNOG00000003550	13.1863	13.1661	13.216	13.2107	13.1485	13.1754	13.0429	12.9626	13.1751	12.9044	13.0561	13.1415	12.9385	13.1394	13.0929	13.2907	13.1211
ENSRNOG00000003551	12.5609	12.6135	12.5909	12.591	12.7059	12.7368	12.9403	12.7898	12.6539	12.9104	12.7519	12.6594	12.6517	12.7915	12.6925	12.8239	12.5742
ENSRNOG00000003553	11.0343	10.7796	11.0667	10.6324	11.5417	11.1871	11.0127	10.9295	10.862	11.2104	11.4834	11.1219	11.7375	11.1286	10.9891	10.9323	10.5817
ENSRNOG00000003555	4.514	5.47738	4.87849	3.93224	5.40963	5.47332	5.46351	5.07734	5.29714	5.46972	5.11644	4.99611	5.58045	4.94703	4.7525	4.6728	5.48857
ENSRNOG00000003560	5.28553	6.27157	5.71564	5.45189	5.61333	5.39966	5.88576	5.40595	6.02902	5.48451	5.23674	5.63881	5.41981	5.70647	5.88535	5.33902	5.74447
ENSRNOG00000003563	12.4293	12.125	12.3819	12.2878	12.3439	12.455	12.2667	12.0966	12.1762	12.0925	12.1588	12.2905	12.239	12.2269	12.1259	12.266	12.442
ENSRNOG00000003566	5.87499	6.39744	6.00938	5.72827	5.87002	6.26125	6.31931	6.35844	6.07934	6.18144	6.62467	6.13119	5.91421	6.55278	6.57238	6.20143	5.51972
ENSRNOG00000003569	4.78249	4.94548	6.44118	5.17569	5.8957	5.66038	5.4682	6.1212	6.079	5.13151	5.39191	5.48538	5.24777	5.80789	5.41183	5.84348	5.41736
ENSRNOG00000003580	4.76159	4.85571	4.91944	5.06423	4.56077	4.92887	5.0898	4.87097	5.0561	4.84799	5.24083	4.82713	4.82144	4.61928	4.91284	5.12967	5.09157
ENSRNOG00000003585	9.16068	9.98192	9.66881	8.63471	10.5199	10.3676	10.9956	11.5024	11.1173	10.5945	10.7463	9.89499	10.1557	10.1494	10.4162	10.4667	10.0649
ENSRNOG00000003587	5.95843	5.3249	5.08683	7.78847	4.97324	5.0292	5.20542	4.69625	5.21878	4.46943	5.07913	5.52354	5.02125	4.99936	5.53017	6.21438	5.08099
ENSRNOG00000003594	13.5347	13.4417	13.4293	13.4137	13.4589	13.5416	13.395	13.3365	13.3865	13.3244	13.2717	13.4574	13.3458	13.3933	13.5571	13.4204	13.3714
ENSRNOG00000003597	14.503	14.4774	14.584	14.4022	14.5594	14.5549	14.5709	14.6088	14.5574	14.5442	14.5782	14.5098	14.3695	14.6956	14.4422	14.6545	14.5202
ENSRNOG00000003599	12.4924	12.4092	12.559	12.4698	12.4909	12.5247	12.4572	12.2785	12.3201	12.2827	12.3199	12.4683	12.313	12.5268	12.4288	12.4406	12.4135
ENSRNOG00000003611	13.4664	13.5846	13.4954	13.4629	13.4524	13.7184	13.7154	13.4861	13.6158	13.3685	13.6318	13.5405	13.4802	13.6969	13.5076	13.5867	13.4519
ENSRNOG00000003613	10.7854	10.7768	10.841	10.6039	11.0863	11.2712	11.6622	11.5217	11.1549	11.3055	11.3324	10.9941	10.978	11.2933	11.3109	11.2373	10.7134
ENSRNOG00000003614	9.82275	10.2357	9.66301	10.5467	9.48234	9.67407	10.673	10.9873	10.4751	10.8262	10.382	10.0097	10.2829	10.1531	10.2269	10.0002	10.45
ENSRNOG00000003620	8.22233	6.86211	7.02442	7.15911	7.44098	7.16913	7.16406	6.45458	7.05066	6.87144	8.00154	7.20836	6.9243	6.89762	7.17525	7.88377	7.21223
ENSRNOG00000003622	9.17447	7.81516	8.1435	8.81125	8.61341	9.09415	7.88885	8.1009	8.2763	8.11504	9.23308	8.54267	8.87464	7.82027	8.53717	9.37921	7.82076
ENSRNOG00000003625	13.4496	13.1535	13.4519	13.3759	13.3259	13.3272	13.1648	13.4016	13.4607	13.3408	13.3878	13.3504	13.4026	13.2586	13.4084	13.4199	13.2566
ENSRNOG00000003626	14.3608	14.2889	14.3652	14.273	14.379	14.4235	14.1803	14.0081	14.1516	14.1164	14.1467	14.3327	14.2477	14.3071	14.3491	14.2981	14.075
ENSRNOG00000003633	5.43862	5.32418	4.81517	5.25564	4.92505	5.26281	5.54773	5.34125	5.23828	4.81724	4.7333	5.22591	4.64723	5.57622	5.78831	4.99574	4.80774
ENSRNOG00000003634	10.6766	10.4881	10.6994	10.7467	10.8218	10.6728	10.8189	10.5544	10.4096	10.4293	10.6794	10.6688	10.5975	10.6631	10.6531	10.6308	10.6556
ENSRNOG00000003645	14.4136	14.3684	14.3892	14.3942	14.3532	14.354	14.2656	14.2202	14.3503	14.3877	14.3436	14.3706	14.3625	14.3387	14.3615	14.4328	14.2628
ENSRNOG00000003649	10.7276	10.8353	10.8531	10.8361	10.8664	10.8372	11.2479	11.1903	11.0823	10.8606	11.2996	10.8693	10.6998	11.0365	11.1316	11.1755	10.7327
ENSRNOG00000003653	13.621	13.3438	13.435	13.5611	13.0833	13.2288	13.1553	13.1706	13.2884	13.1544	13.3774	13.3577	13.2063	13.2802	13.4602	13.2625	13.3732
ENSRNOG00000003654	9.83633	9.38028	9.83256	9.51698	10.0048	10.0667	10.07	9.84643	10.1326	9.57195	10.1386	9.81651	9.51628	10.0263	10.1683	10.4831	9.0548
ENSRNOG00000003661	13.7217	14.0125	13.9071	13.6346	13.8274	13.956	13.8583	13.9668	14.0661	13.8861	14.0382	13.8462	13.6552	14.0114	13.8902	14.1417	13.7592
ENSRNOG00000003668	6.41788	7.92314	6.87917	7.1248	6.10816	6.53702	6.71791	6.61174	6.94802	6.86933	6.78932	6.94552	7.16283	6.96959	7.38707	6.02143	6.59698
ENSRNOG00000003669	4.97954	5.02034	4.74624	4.97031	5.3192	5.61745	5.4751	5.36711	4.9843	5.09764	4.94597	5.14697	5.38281	5.72959	4.55728	5.00157	5.02621
ENSRNOG00000003670	14.9626	14.8419	14.9327	14.918	14.5244	14.7452	14.5392	14.7317	14.7763	14.7763	14.781	14.7972	14.6855	14.8092	14.7556	14.7428	14.8969
ENSRNOG00000003671	5.74836	5.97737	5.87797	6.17437	5.89801	6.0284	6.11513	5.68441	5.78827	5.55193	5.09443	5.89829	5.74233	6.00901	5.62877	5.57694	6.15739
ENSRNOG00000003673	11.14	11.1767	11.3245	11.2354	11.4611	11.5184	11.5146	11.3076	11.3396	11.1327	11.5593	11.3161	11.3482	11.4028	11.2377	11.5407	11.1443
ENSRNOG00000003674	10.9271	10.7394	10.5033	10.3816	11.0328	11.1585	10.8687	10.5967	10.7008	10.6527	10.6838	10.7756	10.6076	10.68	10.9499	11.0147	10.5114
ENSRNOG00000003680	13.2103	12.6161	12.7798	13.2847	12.2695	12.255	12.7624	12.9038	12.6814	12.9995	12.7875	12.7334	12.6552	12.8526	12.6778	12.4958	13.1787
ENSRNOG00000003683	5.02923	5.49018	5.14331	5.62149	5.00722	5.4493	5.22366	5.91072	5.70734	5.30353	6.0916	5.33989	5.43512	5.44157	5.44157	5.89029	4.98642
ENSRNOG00000003687	12.8761	13.0378	12.7368	13.3718	12.5816	12.4061	12.5605	12.6344	12.8066	12.4287	12.6585	12.7619	12.6333	12.603	12.6106	12.6852	13.1646
ENSRNOG00000003689	14.2814	13.9362	14.1462	14.0613	14.182	14.267	14.2785	14.2158	14.1762	14.3067	14.2638	14.1558	14.1958	14.2054	14.1268	14.2774	14.134
ENSRNOG00000003695	5.45924	5.40323	5.76953	5.28949	5.34873	5.55113	5.48268	5.75814	5.67806	5.50842	5.82451	5.46706	5.30621	5.53673	5.5392	5.65169	5.67567
ENSRNOG00000003706	13.5738	13.4542	13.5207	13.3082	13.593	13.5772	13.433	13.6217	13.6795	13.613	13.7144	13.5146	13.5702	13.5329	13.5013	13.6855	13.4543
ENSRNOG00000003709	6.06181	5.68486	5.6125	5.79076	5.72055	5.87496	6.32364	5.79616	5.61521	6.34163	6.16177	5.72021	5.55472	5.46747	5.71424	6.2447	6.44453
ENSRNOG00000003714	12.06	12.1608	12.1533	12.1524	12.503	12.13	12.1897	12.0339	12.0399	12.0343	11.9514	12.178	12.2221	12.0403	12.1801	12.0965	12.1313
ENSRNOG00000003716	8.2616	8.34877	8.15637	7.98812	8.51266	8.63115	8.4011	8.0997	8.19682	7.77894	7.27806	8.2576	7.92047	8.20651	8.29274	7.907	8.48915
ENSRNOG00000003718	4.52435	4.2417	4.26122	4.29777	4.72203	4.5003	4.65562	4.523	4.36844	4.54538	4.39857	4.46468	4.76742	4.19546	4.67188	4.23559	4.42382
ENSRNOG00000003720	10.9051	10.9003	10.73	10.8184	10.6968	10.7283	10.5143	10.7451	10.7288	10.8486	10.8814	10.8321	10.9663	10.8068	10.937	10.6699	10.518
ENSRNOG00000003721	12.7814	12.5687	12.6367	12.5611	12.6009	12.5285	12.6294	12.8428	12.9072	12.8309	12.8539	12.6355	12.7133	12.6843	12.6447	12.7268	12.7089
ENSRNOG00000003728	11.2404	10.7614	10.9727	10.8666	11.0014	10.9242	11.19	11.3556	11.2324	11.1041	11.4909	11.0046	11.0871	11.1128	11.0749	11.0785	11.1052
ENSRNOG00000003741	12.2656	13.5771	12.9319	12.4914	13.0027	13.4126	13.9497	14.121	13.9266	13.9412	13.7502	13.0677	13.2097	13.3375	13.3805	13.594	13.2669
ENSRNOG00000003743	12.9624	12.6051	12.89	12.824	12.8153	12.9997	12.8321	12.6471	12.6363	12.7982	12.8106	12.8593	12.8989	12.8441	12.8941	12.8006	12.6062
ENSRNOG00000003745	8.31179	7.5748	7.13213	8.80709	6.88172	6.71641	7.3717	8.16791	8.01612	8.17605	7.43517	7.62103	7.55478	7.64414	7.96644	7.68984	7.55376
ENSRNOG00000003746	11.5123	10.3326	11.1213	10.4791	11.1791	10.9992	11.0847	10.9839	10.8891	11.3912	10.833	11.0334	11.5458	11.1679	10.9634	10.3161	10.9491
ENSRNOG00000003749	11.1256	11.3538	11.356	11.2729	11.383	11.4755	11.6413	11.7476	11.4349	11.2132	11.316	11.3568	11.0848	11.6071	11.5525	11.4254	11.2721
ENSRNOG00000003759	11.7919	11.2201	11.479	11.5929	11.5126	11.4645	11.5175	11.4748	11.568	12.0437	11.6238	11.5319	11.7932	11.383	11.5503	11.7096	11.3986
ENSRNOG00000003763	11.8323	10.6047	11.1133	11.2435	11.3983	11.3609	10.8201	10.6035	11.1247	11.1409	11.1225	11.1823	10.9387	10.8604	11.2882	11.9791	10.5888
ENSRNOG00000003765	4.83951	4.43699	4.5951	4.70164	5.2876	5.12314	5.146	5.60485	5.11278	4.47357	4.66123	4.89189	5.02514	4.93196	5.08593	4.69861	4.78645
ENSRNOG00000003772	12.0537	11.2117	11.7673	11.5639	11.8066	11.6606	11.2924	11.123	11.4114	10.9262	11.4298	11.6235	11.4247	11.3755	11.7478	11.5246	11.4002
ENSRNOG00000003773	13.4002	13.387	13.4227	13.2148	13.4425	13.5561	13.6227	13.4959	13.5357	13.5949	13.5863	13.427	13.5272	13.4131	13.4795	13.4704	13.4696
ENSRNOG00000003776	6.09744	6.92737	6.5068	6.9883	6.32357	5.89146	6.42976	6.48191	6.08597	6.75485	6.03958	6.43858	6.01749	6.65422	6.5406	6.43086	6.43077
ENSRNOG00000003777	7.26581	7.16399	7.10039	6.82016	7.15753	7.0241	6.67808	6.89796	6.88621	6.93144	6.87964	7.01031	6.63164	6.59265	7.33653	7.14944	7.21805
ENSRNOG00000003779	9.80296	10.1294	9.5059	10.5612	9.52064	9.91428	9.64328	9.98067	10.1795	9.13841	10.0735	9.99507	10.1084	10.2832	10.1296	9.89724	8.9585
ENSRNOG00000003782	11.7463	11.7016	11.6329	11.6422	11.7988	11.9656	12.0242	12.0191	11.8598	11.6605	11.7158	11.7415	11.448	11.8279	11.9101	11.9846	11.7811
ENSRNOG00000003800	12.007	11.585	12.2066	12.4715	11.7529	11.7243	11.6724	11.5529	11.9388	11.4299	11.7003	11.8746	11.9136	11.3824	11.8282	11.8373	12.18
ENSRNOG00000003802	9.19754	8.5841	9.20471	8.80059	8.85361	9.02741	8.75909	8.54654	8.74048	8.94536	8.88371	8.93946	9.09763	8.88204	8.80748	8.71206	8.88171
ENSRNOG00000003803	11.6833	11.7416	11.704	11.6237	11.5656	11.7433	12.0756	11.9668	11.7868	12.0917	11.7411	11.7119	11.6957	11.9292	11.7208	11.6519	11.9189
ENSRNOG00000003809	13.4324	13.6006	13.4147	13.4136	13.7501	13.7469	13.5282	13.323	13.3793	13.3888	13.2739	13.5579	13.6273	13.5491	13.4862	13.448	13.3249
ENSRNOG00000003812	13.3696	13.3813	13.5093	13.4188	13.3418	13.4374	13.5379	13.8661	13.6576	13.6997	13.7816	13.4637	13.6105	13.5158	13.5885	13.5116	13.4524
ENSRNOG00000003813	7.94809	8.02214	7.64667	7.93615	7.51305	7.76916	8.04419	8.24807	7.9612	7.64527	7.9773	7.82341	7.18592	7.99228	8.39723	8.06106	7.74207
ENSRNOG00000003815	14.118	14.1335	14.1067	14.1893	13.8782	13.9588	13.9969	14.0467	14.1564	13.9338	14.1453	14.0553	13.9831	14.014	14.1164	14.0353	14.1499
ENSRNOG00000003825	11.1681	10.8712	11.2645	11.0482	11.5012	11.5253	11.7033	11.4958	11.1711	11.2965	11.379	11.2571	11.2142	11.4255	11.2958	11.4403	11.1481
ENSRNOG00000003831	10.3058	9.94183	10.021	10.2076	10.5722	10.4278	10.5865	10.3431	10.0921	10.0706	10.2072	10.2261	9.96725	10.2425	10.3494	10.5905	10.0964
ENSRNOG00000003833	12.6309	12.6033	12.6865	12.7063	12.4161	12.2241	12.3936	12.3128	12.5871	12.0341	12.4874	12.5115	12.2009	12.5262	12.6089	12.4259	12.5778
ENSRNOG00000003834	13.2177	13.233	13.1475	13.2587	12.8573	12.9123	12.9213	13.2127	13.1025	13.0565	13.0348	13.1138	12.9588	13.2021	13.2363	12.927	13.1258
ENSRNOG00000003837	11.1432	10.6929	10.9781	10.8145	11.1945	11.0872	10.8412	10.5142	10.7456	10.8318	10.9179	10.9692	11.0562	10.9018	10.8539	11.0185	10.6555
ENSRNOG00000003841	10.3965	11.352	11.2945	10.84	11.4452	11.3846	11.4149	11.7761	11.4105	11.0515	11.3833	11.2104	11.1095	11.5992	11.4725	11.3901	10.6547
ENSRNOG00000003846	14.451	14.3904	14.4645	14.5514	14.4687	14.4718	14.4373	14.4101	14.3374	14.4834	14.2536	14.4584	14.4623	14.4254	14.4399	14.3994	14.4358
ENSRNOG00000003849	10.6649	10.4525	10.7511	10.3456	10.5778	10.6788	10.4597	10.5046	10.4657	10.4069	10.6388	10.5592	10.2335	10.7773	10.5513	10.7252	10.4268
ENSRNOG00000003853	12.6202	12.5225	12.5456	12.5276	12.3441	12.4916	12.336	12.3399	12.5216	12.0106	12.3453	12.5197	12.3576	12.5445	12.7239	12.2492	12.2787
ENSRNOG00000003855	12.7331	12.6488	12.5131	12.3397	12.8898	12.5037	12.8228	12.8666	12.7827	12.7855	12.7774	12.6078	12.5578	12.5681	12.7164	12.6988	12.8888
ENSRNOG00000003864	12.6413	12.5774	12.6034	12.5661	12.7639	12.8036	13.0146	13.0794	13.0706	12.9479	12.9786	12.6962	12.8007	12.7008	12.8089	12.9898	12.7363
ENSRNOG00000003866	9.45592	8.9455	9.84398	9.00205	9.94365	10.0209	9.74453	9.61146	9.7561	9.22828	10.2263	9.59974	10.0937	9.80885	9.28318	9.612	9.27358
ENSRNOG00000003869	10.755	9.48504	9.70071	9.86691	10.3177	10.2546	9.83425	9.75138	10.1989	10.0762	10.4134	10.046	9.83877	9.84461	10.351	11.0457	9.2092
ENSRNOG00000003872	10.3341	9.55348	9.8851	9.80493	9.91406	10.0265	9.7511	9.90599	10.3229	9.33274	9.9428	9.96017	9.97461	10.0535	10.0952	9.84389	9.51834
ENSRNOG00000003873	12.893	12.8773	13.0925	12.4874	13.2752	13.3393	13.1857	13.2991	13.1478	13.3142	13.2032	13.0378	13.2554	12.9854	13.1346	13.081	13.0122
ENSRNOG00000003879	14.1399	13.8764	14.1066	14.0981	14.0124	14.0313	14.0227	13.9294	13.8913	13.9916	14.0682	14.0367	14.0052	14.0256	14.0346	14.0352	13.9886
ENSRNOG00000003880	6.77116	6.06883	6.52409	5.99311	6.64054	6.3105	6.1419	6.50869	6.23187	6.80963	6.79962	6.3997	6.23126	6.89717	6.16065	6.79391	6.07682
ENSRNOG00000003881	13.6379	13.5066	13.6071	13.3714	13.525	13.7574	13.5923	13.4694	13.6423	13.5328	13.5796	13.5499	13.4148	13.5292	13.6	13.7249	13.5498
ENSRNOG00000003883	5.98421	5.98842	5.77207	6.07291	6.00465	5.97525	6.46805	6.0656	6.17469	5.88792	5.82516	5.94436	5.75836	5.89678	6.0466	6.07239	6.28006
ENSRNOG00000003884	6.06008	5.54588	5.73083	5.54209	6.06052	5.87917	6.03417	5.494	5.8597	5.83937	5.76819	5.78582	5.63426	5.77359	5.84593	6.10351	5.63981
ENSRNOG00000003890	13.1504	13.1665	13.0386	13.0731	13.3821	13.2511	13.4586	13.2373	13.1816	13.2888	13.0404	13.1982	13.2871	13.1936	13.2416	13.1019	13.2022
ENSRNOG00000003895	6.66596	5.16564	5.20941	5.78841	5.90989	5.42745	5.79073	6.0209	5.38148	5.13499	6.17934	5.73251	5.25572	6.56517	5.6049	5.78916	5.29424
ENSRNOG00000003899	6.2587	6.57534	5.87659	5.55911	7.78424	7.80652	8.04166	7.76	7.50197	7.35601	6.51998	6.7116	7.18272	6.42115	6.93999	7.21369	7.08544
ENSRNOG00000003901	14.3018	14.1091	14.2068	14.2375	14.209	14.1454	14.0757	14.1629	14.1264	14.0725	14.1046	14.1747	14.1286	14.064	14.1706	14.136	14.3063
ENSRNOG00000003902	5.42827	5.13042	5.15523	5.02494	5.46917	5.69437	5.28061	5.51882	5.25294	5.35343	5.41807	5.33874	5.0989	5.29849	5.74887	5.759	4.78849
ENSRNOG00000003905	14.7442	14.8308	14.6782	14.7372	14.6621	14.6801	14.8208	14.8153	14.633	14.6236	14.6377	14.7013	14.5225	14.6957	14.7609	14.5865	15.0004
ENSRNOG00000003915	10.7977	10.8691	10.8058	10.7228	10.9467	10.9004	11.2307	11.1896	11.1401	10.7701	11.0189	10.8587	10.6907	10.9301	11.0652	10.995	10.991
ENSRNOG00000003918	11.1978	11.3072	11.3175	11.1818	11.1243	11.2707	11.4302	11.2707	11.3692	11.1288	11.2717	11.2317	10.9708	11.4163	11.2994	11.3204	11.2801
ENSRNOG00000003919	11.9809	11.8697	11.9574	11.9288	11.8513	11.8247	11.8681	11.8792	11.836	12.0997	11.9439	11.933	11.9601	12.0839	11.9404	11.8817	11.7096
ENSRNOG00000003923	13.2309	13.0225	13.14	13.1681	13.1471	13.1803	13.0737	13.1333	13.1727	13.1471	13.0156	13.1548	13.2098	13.2305	13.0638	13.1106	13.0507
ENSRNOG00000003924	9.12036	8.63571	8.47164	8.47707	9.00702	9.04722	8.91088	8.97504	8.8239	8.82307	8.82191	8.79442	8.56251	8.82019	9.00807	9.10992	8.6215
ENSRNOG00000003927	9.88257	10.7987	10.412	11.1143	10.3563	10.3554	10.7036	10.9056	10.6431	10.2399	10.2132	10.3746	9.94726	10.3496	10.1549	10.8749	11.1479
ENSRNOG00000003928	13.216	12.9943	13.157	13.1581	13.3178	13.2769	13.3487	13.1525	13.177	13.1821	13.2157	13.1866	13.1882	13.1821	13.1892	13.3357	13.0953
ENSRNOG00000003931	11.0994	10.0059	10.3195	10.3768	10.4672	10.5717	10.2587	10.2067	10.707	10.3472	10.8539	10.4311	10.2389	10.3603	10.4398	11.1717	10.1336
ENSRNOG00000003946	11.1958	10.8796	11.0399	11.0549	11.0246	10.9796	11.1291	11.252	11.0768	11.1791	11.0707	11.0452	11.0107	11.1036	11.1185	11.0402	11.1071
ENSRNOG00000003947	7.29452	7.14937	7.38207	7.33637	7.12272	6.99757	7.83075	7.96012	7.57937	8.52104	7.43434	7.37185	7.91859	7.60393	7.54153	6.97826	7.42409
ENSRNOG00000003948	11.6312	11.4694	11.6204	11.4205	11.5851	11.454	11.6374	12.0667	12.0176	12.094	11.845	11.6073	11.9206	11.7604	11.6037	11.602	11.6142
ENSRNOG00000003951	13.4843	13.3417	13.5396	13.4485	13.1398	13.1544	13.1342	13.1478	13.2507	13.2338	13.3022	13.3255	13.1346	13.432	13.2545	13.2543	13.3908
ENSRNOG00000003954	9.25664	8.64557	8.60754	8.79242	9.17974	8.50565	8.18534	8.78094	8.76591	8.73277	8.65747	8.84187	8.85549	8.92218	8.81165	8.87123	8.28858
ENSRNOG00000003955	11.0123	10.6606	10.8503	10.8632	11.0295	11.2224	10.9809	11.0016	10.7387	10.8797	10.8778	10.9143	10.8422	10.7552	10.9929	11.0881	10.9171
ENSRNOG00000003958	11.3598	11.5308	11.5778	11.4099	11.4122	11.5306	11.622	11.4518	11.6833	11.3179	11.5205	11.4509	11.2152	11.3844	11.6372	11.6729	11.5275
ENSRNOG00000003959	6.49663	5.22716	5.50077	8.85552	5.0187	5.04447	5.06108	5.69966	5.29491	5.05369	5.887	5.93214	6.04743	5.75913	5.43946	6.22387	5.34522
ENSRNOG00000003960	11.1049	5.14396	7.1588	7.00523	7.45269	7.46177	5.68147	5.26893	7.23844	7.27619	8.4145	7.46036	6.92373	5.7958	9.09639	9.2265	5.11654
ENSRNOG00000003964	11.3367	10.7858	11.1857	11.2012	11.0138	11.0322	10.797	10.7958	10.746	10.9583	10.9765	11.0719	11.0351	10.9697	11.0868	10.9901	10.8931
ENSRNOG00000003965	4.84884	4.41299	4.53346	4.52457	4.52896	4.3684	4.56556	4.55131	4.58862	4.80778	4.86357	4.61899	4.79304	4.52586	5.03482	4.49884	4.15646
ENSRNOG00000003967	14.0479	13.9026	13.9674	13.9318	13.9843	14.0649	14.0347	14.1292	14.0127	14.3042	14.0872	13.9999	14.0738	14.0479	13.9781	14.1245	13.9625
ENSRNOG00000003969	10.2246	9.44976	9.89293	9.63236	9.80554	9.39751	9.31994	9.49977	9.76822	9.60256	9.9575	9.79159	9.86688	9.8623	9.99243	9.59316	9.18046
ENSRNOG00000003971	11.528	11.3268	11.3786	11.604	11.4613	11.5053	10.9869	11.7902	11.6395	11.6864	11.4937	11.4248	11.7099	11.226	11.0839	11.69	11.7054
ENSRNOG00000003972	7.12438	7.41767	7.54698	7.08826	7.32981	7.24537	7.65075	7.53984	7.52197	8.09752	7.62426	7.40989	8.10132	7.52884	7.3064	6.8951	7.489
ENSRNOG00000003973	12.3923	12.8319	12.6481	12.7135	12.786	12.7253	12.9994	12.9065	12.9244	12.7355	12.982	12.7312	12.7422	12.8728	12.8685	12.959	12.4541
ENSRNOG00000003975	14.8839	14.8165	14.8821	14.7247	14.6808	14.6691	14.5659	14.7135	14.7404	14.8845	14.8797	14.7798	14.7431	14.7572	14.8611	14.7717	14.7113
ENSRNOG00000003977	12.5189	12.1866	11.5942	12.2544	11.7827	11.1233	12.0987	12.5116	12.2083	11.7348	11.4891	11.8712	11.0942	12.165	12.1213	11.6459	12.6974
ENSRNOG00000003980	13.3658	13.1798	13.214	13.3305	12.9985	13.0441	12.9497	13.0332	13.09	12.9125	12.9328	13.1563	12.9773	13.0916	13.205	12.9733	13.267
ENSRNOG00000003981	10.8924	10.4737	10.9149	10.7534	10.9024	10.9551	10.8768	10.8218	10.7827	10.774	10.7719	10.8151	10.6971	10.9386	10.808	11.0007	10.6123
ENSRNOG00000003984	12.3391	12.1787	12.223	12.1733	12.17	12.1942	11.9254	11.9295	12.0824	11.8183	11.8798	12.1423	11.9044	11.9861	12.112	12.1051	12.3432
ENSRNOG00000003985	11.3707	11.2627	11.557	11.4519	11.4739	11.5106	11.5878	11.4762	11.3722	11.4586	11.4138	11.4581	11.451	11.4576	11.5875	11.439	11.3139
ENSRNOG00000003988	12.5252	12.5054	12.1852	12.7458	12.2319	12.0499	12.4616	12.6508	12.5195	12.4634	12.2861	12.3723	12.1347	12.6222	12.3503	12.4609	12.5051
ENSRNOG00000003990	13.89	13.9814	13.9352	14.0425	13.9736	14.0485	14.0268	13.9511	13.8268	13.9758	13.9571	13.951	13.8793	13.8932	13.9149	14.0818	14.045
ENSRNOG00000003992	6.35566	5.83174	5.86322	6.2487	5.92331	6.03658	6.29625	6.37461	6.29714	6.13798	6.19931	6.08477	5.98342	6.0871	6.43323	6.26771	5.9052
ENSRNOG00000003999	12.2674	12.3747	12.5412	12.296	12.5315	12.6524	12.7732	12.8469	12.7344	12.404	12.7269	12.4798	12.3917	12.6457	12.6177	12.686	12.4062
ENSRNOG00000004000	10.2659	10.1982	10.3454	10.2509	10.361	10.4053	10.3919	10.0866	10.2065	9.9804	10.3129	10.3062	10.069	10.3965	10.4638	10.4485	9.92805
ENSRNOG00000004001	10.3327	10.0976	10.1798	10.2772	10.0191	10.181	10.0638	9.91252	9.94987	9.88687	10.0424	10.1499	9.88184	10.2171	10.1629	10.1575	10.0478
ENSRNOG00000004006	13.1151	12.9448	13.0673	13.145	12.9861	13.0844	12.8295	12.7576	12.8363	12.8145	12.8252	13.022	12.9825	12.8947	12.9785	12.9555	12.9644
ENSRNOG00000004009	6.5461	6.4664	6.52978	6.49039	6.47171	6.78068	6.7247	6.7318	6.90363	6.39306	6.60723	6.61007	6.55727	6.74805	6.90023	6.67527	6.14341
ENSRNOG00000004013	11.8638	11.9942	11.9917	12.1026	11.9005	12.0043	12.2131	12.29	12.1047	11.7841	12.1189	11.9738	11.7761	12.1194	12.0113	12.0814	12.1432
ENSRNOG00000004016	11.8896	11.7099	11.9657	12.0254	11.9031	11.9621	11.8889	11.6409	11.7283	11.6743	11.7629	11.8805	11.9045	11.8217	11.7423	11.8433	11.8769
ENSRNOG00000004019	12.4274	12.7271	12.293	13.1249	12.1749	12.2568	12.658	12.7888	12.6821	12.2434	12.6537	12.5283	12.5045	12.5911	12.6548	12.4305	12.5481
ENSRNOG00000004026	14.5815	14.5295	14.7008	14.2283	14.9148	14.8966	14.9757	14.8465	14.6858	14.9089	14.8543	14.7	14.6808	14.7555	15.0118	14.8389	14.382
ENSRNOG00000004027	12.7053	12.3479	12.595	12.597	12.5665	12.4825	12.4293	12.5155	12.5739	12.5692	12.603	12.5472	12.6282	12.5091	12.4931	12.5887	12.5032
ENSRNOG00000004030	5.1632	4.43368	4.84541	4.76398	4.2964	4.74255	4.36142	4.41848	4.34446	4.43459	4.51592	4.68935	4.30352	5.15067	4.50476	4.54208	4.44061
ENSRNOG00000004049	12.8758	13.4201	13.5201	13.1974	13.3839	13.4823	13.4747	13.6582	13.5256	13.5085	13.5433	13.3213	13.2984	13.3404	13.3733	13.6351	13.3815
ENSRNOG00000004050	12.2963	12.0585	12.2557	12.4252	11.7956	11.9017	12.1358	12.3084	12.2521	12.0778	12.3548	12.1324	12.0528	12.2651	12.141	12.0626	12.3027
ENSRNOG00000004060	15.0212	15.1667	15.1015	15.0559	14.6374	14.6475	14.4831	15.0212	15.011	15.011	15.038	14.9412	14.8762	15.075	14.8891	14.8232	14.979
ENSRNOG00000004062	5.56779	5.21797	5.30667	5.42787	5.5105	5.70892	5.85113	5.95175	5.69028	5.83995	5.67783	5.48328	5.55126	5.85217	5.2064	5.79714	5.58327
ENSRNOG00000004067	13.9913	14.2696	14.2587	14.2543	14.2815	14.2127	14.3533	14.504	14.3517	14.3682	14.3205	14.2317	14.3807	14.3243	14.1119	14.2346	14.3538
ENSRNOG00000004072	12.525	11.8238	11.8482	12.5854	11.9218	11.7653	11.7983	11.8499	12.0153	11.8746	12.0904	12.0315	12.0553	11.7352	12.0234	12.171	12.0732
ENSRNOG00000004076	10.3794	10.0995	10.4279	10.2872	10.3006	10.3088	10.2478	10.3493	10.2597	10.3709	10.4825	10.3175	10.3162	10.3892	10.3491	10.4151	10.1263
ENSRNOG00000004077	13.696	13.0598	13.0795	13.4058	12.7089	12.8834	12.9721	13.1174	12.9246	12.9326	13.2114	13.1064	12.8327	13.0225	13.2686	12.8799	13.4567
ENSRNOG00000004078	10.73	10.3161	10.6556	10.6156	11.1663	11.0225	10.9452	10.7879	10.7057	10.5994	10.4686	10.7437	10.98	10.5432	10.6641	10.6904	10.7737
ENSRNOG00000004083	12.8991	12.6919	12.7483	12.8889	12.8486	12.8946	12.8722	12.7456	12.7615	12.7811	12.7895	12.8229	12.8154	12.8611	12.7579	12.9093	12.7186
ENSRNOG00000004089	15.217	13.8399	14.713	14.1517	14.5211	14.368	13.9219	14.0065	14.1467	14.6716	14.7229	14.4507	14.3778	13.8363	15.0316	14.6723	14.0645
ENSRNOG00000004100	10.5202	10.836	10.5807	10.7611	10.4391	10.5382	10.4844	10.7951	10.4902	10.7155	10.4815	10.5867	10.5346	10.4317	10.6386	10.469	10.935
ENSRNOG00000004107	14.4938	14.5974	14.6409	14.5124	14.6238	14.6211	14.4277	14.2483	14.3554	14.274	14.3579	14.5544	14.5133	14.496	14.491	14.3919	14.5014
ENSRNOG00000004111	11.9086	11.7306	11.5902	11.9616	11.7785	11.7175	11.799	12.0178	11.8201	12.1928	11.7977	11.7897	11.6871	11.7862	11.9468	12.1712	11.6083
ENSRNOG00000004117	9.48928	10.5125	10.6814	10.4274	10.5553	10.847	11.0857	10.9695	10.9202	10.3521	10.4942	10.4459	10.1961	10.5776	10.7266	11.0446	10.2564
ENSRNOG00000004124	5.98888	7.06416	6.49975	6.18608	5.64149	6.19436	6.99485	7.66984	7.11733	7.2198	7.38962	6.44964	6.46512	7.40842	6.59847	6.27694	6.70729
ENSRNOG00000004125	6.45088	5.977	6.71514	6.24226	6.34041	6.07046	5.83424	6.10056	6.15059	6.31961	6.74621	6.30158	6.22931	6.10254	6.58625	6.58192	5.85988
ENSRNOG00000004131	12.5268	12.4446	12.658	12.4626	12.7283	12.4516	12.514	12.4967	12.4244	12.5341	12.5628	12.5527	12.6169	12.4421	12.6436	12.4465	12.5041
ENSRNOG00000004132	12.7341	13.2352	12.3687	13.408	12.0494	12.3162	12.8274	12.9306	12.9633	13.0415	12.8435	12.7152	12.7281	12.8437	12.7533	12.6927	12.8985
ENSRNOG00000004133	10.7952	10.236	11.0184	11.4289	9.68884	9.94151	10.1803	10.1697	10.0864	9.7135	10.5913	10.4982	10.2504	10.5127	10.6122	9.85942	10.6043
ENSRNOG00000004135	12.0814	11.9165	12.2453	12.1521	11.9443	11.8902	11.8107	11.7916	11.9142	11.6284	11.8674	12.023	11.9225	12.1488	11.9056	11.7864	11.9473
ENSRNOG00000004139	13.0134	13.1742	12.9753	13.3399	12.6725	12.6707	12.8314	13.046	13.012	12.9085	12.8489	12.9679	12.8366	13.035	12.9939	12.806	13.1064
ENSRNOG00000004143	14.4334	13.9674	14.1616	14.0576	14.2686	14.2735	14.023	13.995	14.0471	14.1121	14.0582	14.1615	14.0326	14.043	14.2161	14.2902	14.074
ENSRNOG00000004155	10.5312	10.9977	10.6053	10.7043	10.3303	10.6221	11.1699	11.2339	11.1745	10.0866	10.9515	10.7552	10.7291	11.1405	11.1364	10.0794	10.7306
ENSRNOG00000004159	12.7714	12.5603	12.9003	12.774	12.7458	12.8231	12.7365	12.6146	12.6626	12.7489	12.613	12.7472	12.7295	12.6783	12.742	12.7567	12.7221
ENSRNOG00000004160	12.1182	11.039	11.3423	11.4035	11.6839	11.8646	11.38	11.1395	11.6118	11.6226	11.7523	11.5312	11.5134	11.2177	11.5987	12.2547	11.1173
ENSRNOG00000004161	11.0771	11.164	11.3105	11.0913	11.4295	11.4389	11.5311	11.4798	11.2944	11.2734	11.0481	11.2715	11.2194	11.2647	11.448	11.2096	11.2765
ENSRNOG00000004162	10.884	10.7599	10.9438	11.0752	10.9353	10.8392	10.8543	10.9813	10.7178	10.9132	10.8141	10.9005	10.7813	10.9503	10.9359	10.9865	10.7736
ENSRNOG00000004168	11.213	11.61	11.3586	11.2983	11.4844	11.5391	11.7658	11.5169	11.6156	11.3268	11.6864	11.4589	11.5649	11.5444	11.5176	11.4034	11.411
ENSRNOG00000004172	14.0251	14.2743	13.982	14.2068	13.7782	13.9068	14.0435	14.2865	14.3475	14.1425	14.3457	14.0553	14.0678	14.1207	14.1364	14.1463	14.0975
ENSRNOG00000004181	11.7169	11.4498	11.5941	11.5907	11.7248	11.812	11.6537	11.4472	11.4945	11.4868	11.461	11.64	11.5228	11.6569	11.6919	11.7304	11.3546
ENSRNOG00000004188	9.21883	8.73888	8.33335	7.94777	8.39239	8.22237	7.6398	7.98756	8.41912	8.46931	8.50831	8.43624	8.23462	7.82462	9.01333	8.34808	8.39218
ENSRNOG00000004193	12.7822	12.512	12.5697	13.0083	12.5015	12.5844	12.7682	12.6889	12.5699	12.5495	12.6315	12.6176	12.4098	12.6598	12.5307	12.8158	12.8209
ENSRNOG00000004196	14.3188	14.2622	14.2776	14.1567	14.403	14.2683	14.26	14.009	14.1093	14.0615	14.2336	14.2668	14.2308	14.2525	14.2317	14.1644	14.2248
ENSRNOG00000004197	5.89992	7.05083	6.65656	6.70245	6.40165	6.31636	6.39341	6.35516	6.10285	6.23453	6.26562	6.46639	6.42945	6.2959	6.44442	6.02883	6.83297
ENSRNOG00000004201	10.1215	9.98425	9.90105	10.2224	10.1425	10.0563	10.069	10.1961	9.94064	9.62023	10.0074	10.0794	10.0068	10.0596	10.2201	9.90989	9.95578
ENSRNOG00000004212	9.94197	9.97648	10.1519	9.97467	9.93505	10.0883	10.0883	10.1926	10.261	9.87153	10.0157	10.0313	9.8689	10.1146	10.2298	10.0909	9.91357
ENSRNOG00000004219	11.2887	11.214	11.279	11.3511	11.3467	11.3114	11.5806	11.335	11.2966	11.0206	11.2621	11.2701	11.0757	11.1366	11.4272	11.3065	11.5304
ENSRNOG00000004220	13.3403	13.0335	13.1719	13.2917	12.8055	12.8165	12.4208	12.8358	13.0391	13.0064	12.9703	13.0498	12.9426	12.9592	13.0869	13.1141	12.8197
ENSRNOG00000004222	5.01052	5.04852	5.23006	4.97616	4.93018	5.26802	5.66997	5.11097	5.4666	4.89667	4.9152	5.14756	4.68853	6.99632	4.17971	5.21418	4.61895
ENSRNOG00000004225	4.96781	5.77226	5.34421	5.13937	5.09767	4.87754	4.62727	4.7798	4.84552	5.29674	5.17121	5.15367	5.10611	4.84346	5.23458	5.01564	5.26016
ENSRNOG00000004229	10.9785	8.46438	11.2313	9.55216	9.81168	9.95723	9.04113	8.97468	9.36903	9.8106	9.83316	9.89991	9.63792	9.89345	9.57261	9.84637	9.79913
ENSRNOG00000004234	12.5093	12.1932	12.5166	12.5127	12.33	12.4479	12.3937	12.263	12.3973	12.3882	12.5011	12.415	12.3284	12.3756	12.5212	12.6336	12.1714
ENSRNOG00000004249	7.89773	7.90125	7.41962	7.66032	7.65339	7.59034	7.91065	7.86003	7.56628	7.62118	8.11826	7.72065	7.40447	7.70393	8.25482	7.81394	7.53486
ENSRNOG00000004255	12.5989	12.4971	12.739	12.4194	12.7613	12.7008	12.876	12.8475	12.8711	12.7181	12.8096	12.6467	12.5949	12.8022	12.7064	12.8085	12.6114
ENSRNOG00000004257	12.4365	12.3312	12.2982	12.6423	12.0833	12.3214	12.4071	12.4004	12.1954	12.1338	12.1806	12.3238	12.1591	12.2739	12.3681	12.1551	12.6101
ENSRNOG00000004258	5.54576	4.59705	5.19085	4.31945	5.59083	6.0775	6.11766	6.6598	6.3226	5.65289	6.48194	5.42336	5.60676	5.87057	6.01149	5.98527	4.80246
ENSRNOG00000004259	11.4678	11.5843	11.6232	11.5404	11.4578	11.6271	11.5943	11.6603	11.7394	11.2997	11.6956	11.5232	11.3039	11.62	11.4846	11.7494	11.6721
ENSRNOG00000004268	9.3491	8.6498	9.37933	9.09352	9.12455	9.23453	8.96097	9.18109	9.04901	9.18838	9.15753	9.14942	9.01254	9.36451	9.13685	9.34762	8.77525
ENSRNOG00000004269	12.9656	13.1008	13.1495	13.0229	13.2286	13.2706	13.286	13.5806	13.4098	13.3687	13.4122	13.1494	13.1923	13.2465	13.1676	13.4621	13.1393
ENSRNOG00000004280	13.3886	12.3906	12.6498	12.5946	12.8401	12.6797	12.2711	12.4535	12.7522	12.8828	12.9603	12.7296	12.6973	12.3511	12.9748	13.159	12.401
ENSRNOG00000004282	11.4993	10.2917	10.7055	11.4929	10.9698	10.9395	10.7639	10.6687	11.011	10.1706	10.8305	10.9216	10.7878	10.6312	10.9764	11.2577	10.6373
ENSRNOG00000004284	11.8898	11.7971	11.9348	11.673	11.9322	11.9819	11.7465	11.7395	11.9994	11.8165	11.6901	11.8496	11.9227	11.7626	11.7524	11.8299	11.9225
ENSRNOG00000004287	12.3463	11.9864	12.3543	12.3668	12.3705	12.3923	12.2024	12.0605	12.1003	12.1226	12.1278	12.2351	12.0549	12.2205	12.0242	12.5474	12.2662
ENSRNOG00000004288	12.06	11.7551	12.0122	11.7477	12.0457	12.0091	11.8789	11.8017	12.0006	11.7947	11.896	11.9131	11.7443	12.0065	11.837	12.114	11.8468
ENSRNOG00000004291	14.5891	14.5102	14.523	14.519	14.7332	14.7105	14.8099	14.7978	14.5968	14.5681	14.6079	14.6364	14.732	14.5797	14.8304	14.4718	14.5542
ENSRNOG00000004292	13.7179	13.0872	13.598	13.3887	13.3912	13.5492	13.1984	13.0639	13.2592	13.3988	13.3247	13.4439	13.3863	13.4437	13.4326	13.5121	13.0825
ENSRNOG00000004294	7.47002	7.93019	7.99507	8.35072	7.49907	7.47333	7.83483	8.06524	7.66214	7.50738	7.63757	7.7016	7.35063	7.49574	7.74962	7.69	8.50519
ENSRNOG00000004296	4.47323	5.6723	4.81584	5.26582	5.35736	4.87051	4.86652	4.62763	4.69529	4.91343	5.08819	4.98582	5.22892	4.7446	4.44378	5.09755	5.33508
ENSRNOG00000004298	6.36646	6.77497	6.53249	6.44904	6.75373	6.52552	6.53573	6.2888	6.38332	6.74922	6.43081	6.53547	6.77106	6.32195	6.32406	6.41874	6.80152
ENSRNOG00000004300	11.7037	11.3301	11.5873	11.4145	11.6713	11.8517	11.8008	11.9466	11.6223	11.9168	11.6065	11.6213	11.7841	11.5647	11.6845	11.5669	11.7533
ENSRNOG00000004302	7.84563	8.66108	7.66514	9.49688	7.628	7.86759	8.49782	8.5483	7.97519	7.95888	8.3717	8.14421	8.24958	7.87514	8.0088	8.09986	8.85963
ENSRNOG00000004303	13.7886	13.3145	13.4018	13.5691	13.3049	13.2589	13.0564	13.1693	13.4675	13.3824	13.7984	13.4168	13.6341	13.0903	13.3892	13.509	13.4321
ENSRNOG00000004304	11.6164	10.9805	11.3878	11.419	11.1116	11.2606	11.1066	11.0423	11.1942	11.2006	11.1829	11.2672	11.1302	11.1959	11.3024	11.3445	11.1884
ENSRNOG00000004307	10.9549	11.005	11.2583	10.9553	11.2756	11.2443	11.1112	10.9684	10.9142	10.8744	10.9694	11.0831	10.9084	11.0572	11.0894	11.1456	11.0615
ENSRNOG00000004311	9.90666	9.62316	9.97307	9.67068	10.2495	10.0614	9.88852	9.72647	9.84754	10.0868	10.2089	9.95725	10.4587	9.79489	9.87721	9.95188	9.58871
ENSRNOG00000004312	12.0736	11.5433	11.785	11.7124	11.7644	11.7562	11.4375	11.4925	11.6445	11.6683	11.7221	11.7357	11.5471	11.7728	11.6665	11.9751	11.5197
ENSRNOG00000004317	10.1851	9.07073	9.49673	9.46137	9.32744	9.45745	9.21512	9.03222	9.11534	9.39161	9.3817	9.52248	9.57181	9.54511	9.58653	9.11817	9.1458
ENSRNOG00000004320	4.99479	5.09169	4.88603	4.99328	4.96052	5.17412	5.05248	4.65523	4.87363	4.87	4.89483	4.90771	4.83252	4.62237	4.61404	5.1183	5.53603
ENSRNOG00000004322	13.4819	13.3404	13.2698	13.5363	13.3633	13.2847	13.254	13.0764	13.0422	13.0273	13.1818	13.357	13.2802	13.32	13.3364	13.155	13.2659
ENSRNOG00000004327	10.2098	10.1928	10.2632	10.1444	10.0599	9.59614	10.6162	9.77649	10.5675	10.0229	9.64303	10.1055	10.2155	10.1221	10.1454	9.42358	10.5937
ENSRNOG00000004330	10.273	9.94569	10.5474	10.0111	10.3435	10.335	10.1414	9.97197	9.95836	10.4519	10.2076	10.2448	10.4993	9.97021	10.2784	10.0313	10.2425
ENSRNOG00000004332	10.3182	10.9158	10.3771	10.5862	10.2729	10.6875	10.4746	10.3466	10.3782	10.3677	10.7436	10.5471	10.3609	10.6073	10.798	10.7066	10.0428
ENSRNOG00000004339	11.3058	11.159	11.3914	11.1616	11.1947	11.2436	11.2738	11.3411	11.3169	11.4354	11.3481	11.2842	11.3691	11.3871	11.3454	11.1763	11.1611
ENSRNOG00000004342	9.68124	9.43756	9.07883	9.5173	9.43724	9.44621	9.56164	9.97795	9.93231	9.10126	9.81575	9.49355	9.27737	9.82812	9.73809	9.7752	9.07227
ENSRNOG00000004344	12.1554	12.1123	12.1496	12.2084	11.9224	11.9192	12.0291	12.0953	12.1301	12.1366	12.2219	12.075	11.9702	12.1302	12.1076	12.1663	12.1029
ENSRNOG00000004346	8.25192	8.00753	7.35749	7.91849	7.41491	8.02546	8.67474	8.68594	8.82098	8.20634	8.90121	7.99643	8.51264	8.17998	8.2995	7.86731	8.04442
ENSRNOG00000004351	8.99609	8.91206	9.12379	8.73882	8.96166	9.14088	9.04921	8.94477	9.1089	8.75607	9.34659	8.9958	8.89819	9.12493	9.0658	9.12152	8.81859
ENSRNOG00000004356	6.27933	6.22054	5.5861	6.09691	6.19054	5.71006	5.7385	5.62868	6.0599	6.04536	6.37622	5.99384	5.96094	6.5404	5.35979	6.54273	5.5653
ENSRNOG00000004359	13.1736	13.1208	13.0782	13.4278	12.928	12.9059	13.2289	13.322	13.2608	13.2492	13.32	13.1074	13.1082	13.1177	13.1068	13.2204	13.3174
ENSRNOG00000004360	11.2305	10.939	11.3401	11.1141	11.2519	11.2384	11.1174	11.1035	11.0409	11.4078	11.093	11.1784	11.2584	11.1848	11.0486	11.2084	11.1574
ENSRNOG00000004364	12.552	12.5256	12.6002	12.4404	12.523	12.9807	12.8735	12.7334	12.7268	12.7698	12.8556	12.6342	12.7176	12.782	12.5861	12.8	12.5272
ENSRNOG00000004373	10.5947	10.3544	10.7248	10.4508	10.7014	10.7439	10.5825	10.3668	10.2896	10.5257	10.3884	10.5752	10.4499	10.618	10.5389	10.5908	10.4367
ENSRNOG00000004377	11.5295	11.2845	11.6103	11.5465	11.2851	11.2346	11.0204	11.2171	11.3504	11.1959	11.4714	11.3812	11.4018	11.3159	11.2231	11.3362	11.45
ENSRNOG00000004378	9.94459	9.77716	9.81485	10.1949	9.63584	9.76931	9.97091	10.0809	9.71377	9.8279	10.0433	9.80639	9.50327	9.82462	9.79296	10.095	10.1774
ENSRNOG00000004380	6.31652	6.36731	6.00233	6.28859	6.66975	6.38429	6.51023	5.96081	6.22098	6.26675	5.64347	6.23372	6.2973	5.63516	6.14226	6.21761	6.90032
ENSRNOG00000004390	6.83678	5.85696	6.63292	7.07369	6.79787	6.79918	7.02087	6.7955	6.76937	6.82646	6.82538	6.63607	7.03958	6.47953	6.20806	7.01281	6.93566
ENSRNOG00000004400	7.23971	6.34782	6.65645	6.5208	6.80462	7.40281	6.8592	7.253	7.42965	6.98783	7.38284	6.8954	7.19508	6.61019	7.28112	7.33774	6.467
ENSRNOG00000004401	12.5195	12.2687	12.4022	12.3537	12.4188	12.3831	12.4386	12.2396	12.3814	12.1573	12.3272	12.3608	12.1594	12.3142	12.4271	12.4503	12.4215
ENSRNOG00000004404	5.92728	5.22357	5.93335	5.68131	6.01507	5.83082	6.24257	6.51516	6.18573	5.85969	5.81343	5.81478	5.78082	6.10537	5.83544	5.83996	6.01847
ENSRNOG00000004405	6.28788	6.65431	6.56671	6.49433	6.69084	6.49398	6.39699	6.56774	6.73074	6.40057	6.45072	6.47265	6.56892	6.24524	6.25165	6.58739	6.92431
ENSRNOG00000004410	11.5335	11.2544	11.444	11.5304	11.4579	11.4316	11.0095	11.1279	11.1766	11.3735	11.3258	11.4444	11.6792	11.433	11.2358	11.3283	11.0564
ENSRNOG00000004411	10.7216	10.2916	10.3635	10.4633	10.6674	10.4971	10.1477	9.86599	10.1006	10.0599	10.1723	10.454	10.5528	10.096	10.4325	10.2489	10.2825
ENSRNOG00000004414	10.7479	9.95173	10.1716	10.3529	10.5877	10.2858	10.1887	9.83666	10.2138	10.1412	10.3401	10.2907	10.1217	9.97506	10.4217	10.7888	9.99431
ENSRNOG00000004420	14.1453	13.9923	13.9314	14.2566	13.8562	13.9838	13.9734	13.918	13.968	14.0867	13.9992	14.0032	13.9815	13.9025	13.9789	14.1259	14.0574
ENSRNOG00000004421	11.732	11.6138	11.7057	11.6218	11.5514	11.5786	11.4112	11.5392	11.6433	11.4619	11.5786	11.6191	11.4609	11.6361	11.6718	11.6473	11.5304
ENSRNOG00000004423	13.4214	13.5391	13.7758	13.3592	13.8062	13.8332	13.9887	14.0784	13.8769	14.0477	13.9363	13.6817	13.8745	13.8747	13.6513	13.7926	13.6811
ENSRNOG00000004424	11.7356	11.7599	11.8556	11.8824	11.9516	11.9801	12.065	11.8724	11.7949	11.7991	11.8394	11.912	11.9282	12.0715	12.043	11.8697	11.4492
ENSRNOG00000004437	13.1463	12.9365	12.9332	13.193	12.9948	13.1272	13.0639	12.9835	13.0146	12.7744	12.875	13.03	12.9273	12.9442	13.0671	13.0468	13.0496
ENSRNOG00000004438	14.9779	14.5757	14.6678	14.686	14.6986	14.6846	14.6349	14.8096	14.7904	14.8336	14.8711	14.6998	14.6874	14.4384	14.8817	14.8649	14.8396
ENSRNOG00000004440	7.20933	6.55088	7.06569	6.95425	6.92995	6.89895	7.1528	7.29405	7.17131	7.19984	7.44286	7.0082	7.27668	6.9962	7.19182	6.97579	6.91239
ENSRNOG00000004441	6.85117	5.35427	6.0764	5.28768	6.81818	6.85749	6.27874	6.05741	6.15363	6.16309	7.66944	6.2809	6.72511	6.2354	6.32239	6.90976	5.40287
ENSRNOG00000004451	8.77777	6.17053	8.72037	6.38081	7.06621	6.62993	5.5153	6.06205	6.51497	6.79172	6.36356	7.18728	6.6674	7.54939	6.72315	5.95742	7.41229
ENSRNOG00000004456	5.73029	4.84998	5.35695	5.21064	5.14682	5.03999	4.83878	5.46401	5.47211	5.24825	5.98929	5.17975	4.79921	5.18289	5.30097	6.04094	5.12268
ENSRNOG00000004464	13.036	13.1808	13.154	13.2089	13.1438	13.2045	13.7537	13.8726	13.6391	13.9163	13.6675	13.2305	13.4093	13.4559	13.2812	13.5522	13.3506
ENSRNOG00000004470	5.12472	4.82179	4.92777	4.2885	4.50971	4.55816	4.38281	4.18203	4.37864	4.8277	4.64934	4.66281	4.53536	4.64278	4.55646	4.28135	5.04221
ENSRNOG00000004473	12.3412	12.4089	12.3068	12.7017	12.2315	12.1582	12.3119	12.2377	12.1833	12.1214	12.3695	12.3365	12.2499	12.3161	12.3138	12.3014	12.3696
ENSRNOG00000004474	12.7283	12.6986	12.7549	12.9019	12.5252	12.7778	12.7838	12.599	12.5521	12.4959	12.4784	12.6995	12.4658	12.7572	12.6857	12.6269	12.8024
ENSRNOG00000004476	9.13619	8.97478	9.26325	9.90394	8.71911	8.98636	9.14317	9.08345	8.95772	8.71546	9.00334	9.11294	8.63346	9.21585	9.18349	9.34294	9.04673
ENSRNOG00000004477	13.4185	13.2691	13.4829	13.4619	13.3894	13.461	13.3985	13.2647	13.1941	13.1382	13.2443	13.3865	13.1512	13.4459	13.3988	13.4033	13.3219
ENSRNOG00000004479	11.845	11.4244	11.5922	11.7163	12.0174	11.8379	11.7343	11.4043	11.5548	11.5286	11.5146	11.69	11.64	11.476	11.6607	11.9377	11.5676
ENSRNOG00000004483	11.3413	10.6003	11.2694	10.9061	10.8866	11.1493	11.288	11.0621	11.1117	11.0448	11.1686	11.045	10.7586	11.3418	11.1516	11.1952	10.911
ENSRNOG00000004484	10.981	10.7081	10.9715	10.7439	10.936	10.9386	10.9629	10.8385	10.9612	10.8175	10.8921	10.881	10.7581	10.9349	10.9565	10.9831	10.7965
ENSRNOG00000004488	5.01894	5.26173	5.02003	5.15929	4.79902	4.51624	4.68402	4.67584	4.61866	5.13309	5.01093	4.89411	4.67142	4.84273	4.75758	4.96434	5.25951
ENSRNOG00000004489	11.5162	10.6863	11.2574	11.0381	11.2077	11.129	10.6068	10.9459	11.1714	10.8268	11.3902	11.1744	11.5395	10.929	11.266	10.9832	10.6974
ENSRNOG00000004492	9.85856	9.48722	9.73048	9.65991	9.6583	9.87989	9.90404	9.76717	9.80155	9.82184	9.70546	9.71753	9.59224	9.94136	9.64982	9.91196	9.64492
ENSRNOG00000004493	10.3093	10.4681	10.3512	10.581	10.3047	10.3629	10.6201	10.4555	10.491	10.0488	10.3382	10.3792	10.0831	10.4405	10.5118	10.4629	10.4616
ENSRNOG00000004494	12.458	12.0819	12.1189	12.1899	12.172	12.3156	12.2542	12.4387	12.3106	12.4013	12.4385	12.2224	12.2042	12.2573	12.2035	12.4407	12.2996
ENSRNOG00000004496	12.7201	13.301	13.1369	13.223	13.1517	13.0684	13.4826	13.3462	13.2248	13.1463	13.1451	13.1239	13.0833	13.2355	13.1954	13.1471	13.1916
ENSRNOG00000004498	5.95884	6.04167	5.5559	5.677	5.16288	5.45382	5.47319	5.48813	5.99185	5.89225	5.97804	5.63056	5.89667	5.43399	5.49431	5.44197	6.18083
ENSRNOG00000004499	7.34704	6.68058	7.51747	7.16586	7.29536	7.82588	8.0123	7.88782	7.71922	7.49483	7.76871	7.3809	7.19189	7.78284	7.62115	7.9443	6.97438
ENSRNOG00000004500	9.55929	9.90936	9.94869	9.29036	9.96415	10.0614	10.2235	10.2115	9.95004	10.1331	10.2682	9.84217	9.91276	9.98912	9.94442	9.88354	9.98331
ENSRNOG00000004502	6.23141	5.61032	5.63408	5.34096	6.76333	6.75811	7.5192	6.97773	6.64442	6.31342	6.14416	6.18195	6.3844	6.33502	6.57995	6.07792	6.30673
ENSRNOG00000004505	12.0911	12.5017	11.7753	12.4081	11.9433	11.8226	12.5236	12.8059	12.7397	13.193	12.7055	12.2155	12.7796	12.3604	12.257	12.3148	12.2214
ENSRNOG00000004510	14.4535	14.344	14.3403	14.3583	14.6025	14.5347	14.4359	14.4419	14.5647	14.4908	14.382	14.3992	14.3517	14.3602	14.2478	14.7616	14.4978
ENSRNOG00000004512	11.275	10.7929	11.1821	10.8424	11.1018	11.2526	10.9058	10.873	11.0107	11.0423	11.0992	11.0723	10.9689	11.0519	11.1834	11.2577	10.7325
ENSRNOG00000004515	13.2601	13.0823	13.225	13.1349	13.1921	13.1082	13.1683	13.0225	13.073	13.1198	13.1061	13.162	13.1778	13.1543	13.1239	13.0242	13.2141
ENSRNOG00000004516	11.111	12.6013	11.8725	11.2143	12.2575	12.4922	12.7144	13.0777	12.9205	11.9222	12.7253	12.0373	11.8349	12.5404	12.4115	12.5484	11.8508
ENSRNOG00000004517	10.679	9.97007	10.5074	10.2462	10.1281	10.1943	9.98783	10.0539	10.1549	9.9316	10.693	10.2548	9.97891	10.0889	10.5006	10.4525	10.1504
ENSRNOG00000004518	12.4407	13.1234	12.8285	12.8988	12.8065	12.7502	13.1673	13.2461	13.1076	13.2636	13.0068	12.8787	13.1178	13.0075	12.9351	12.8114	12.9112
ENSRNOG00000004524	11.7838	11.853	11.8343	11.7445	11.8845	11.7765	11.5823	11.5194	11.577	11.5386	11.6077	11.8029	11.6314	11.777	11.9415	11.738	11.4745
ENSRNOG00000004527	11.4493	11.5234	11.4313	11.9572	11.1108	11.2055	11.3754	11.3777	11.4078	10.9386	11.2437	11.4313	11.3071	11.4177	11.4792	11.1207	11.5423
ENSRNOG00000004532	11.2165	11.2094	11.224	11.2033	11.1838	11.2881	11.3489	11.1696	11.292	10.7339	11.2776	11.1886	10.8357	11.3841	11.1527	11.3595	11.24
ENSRNOG00000004534	8.78743	8.62284	8.99859	8.6202	9.15233	9.19996	9.22193	8.78337	8.7753	8.54662	8.86236	8.89138	8.5805	9.08077	8.9798	9.10445	8.61767
ENSRNOG00000004535	8.1237	9.77356	7.89515	10.472	7.98207	8.17467	9.10884	9.01816	8.66013	7.8239	8.67054	8.65152	8.75601	7.97553	8.71102	8.20679	9.82262
ENSRNOG00000004537	10.6024	12.0544	10.6732	11.9116	11.0077	10.6052	12.0732	12.1898	11.9468	9.2811	11.7299	11.2029	10.7443	11.4457	11.7816	10.589	11.7912
ENSRNOG00000004544	13.6187	13.6334	13.5277	13.5985	13.4921	13.5492	13.5558	13.8162	13.8942	13.8403	13.7075	13.606	13.7296	13.7145	13.5907	13.7012	13.5212
ENSRNOG00000004549	12.7299	12.3967	12.5168	12.5482	12.6041	12.6465	12.5354	12.4776	12.4583	12.5393	12.4603	12.5651	12.4774	12.5173	12.6493	12.6401	12.4202
ENSRNOG00000004554	12.2793	11.6541	11.1908	13.307	11.8294	11.5444	12.1699	11.7315	11.4697	11.9093	12.7426	11.9103	12.1165	11.4822	11.7893	12.7188	11.7706
ENSRNOG00000004560	11.0439	11.3674	11.3507	11.3767	11.2197	11.3047	11.668	12.1016	11.8264	11.412	11.6385	11.3439	11.4052	11.6313	11.3951	11.3866	11.512
ENSRNOG00000004572	8.50199	7.52514	8.49371	7.93621	8.26345	8.40885	8.55128	8.38684	7.93257	8.32973	8.40685	8.16108	7.56416	8.35137	8.40483	8.6833	8.18763
ENSRNOG00000004575	6.70002	6.35822	6.37739	6.11455	5.96524	6.24883	5.92169	6.41624	5.91796	6.53047	6.76983	6.32159	6.14357	6.03332	6.95316	6.20378	6.18732
ENSRNOG00000004577	12.6397	12.3924	12.5738	12.4575	12.6322	12.7057	12.4922	12.5266	12.5977	12.4313	12.4035	12.5651	12.6037	12.4961	12.5851	12.5092	12.4859
ENSRNOG00000004578	7.77705	6.44551	7.30855	6.92304	6.99301	6.83054	7.01041	6.91706	6.95602	6.89394	7.20907	7.1074	6.81036	7.70559	7.17293	6.93253	6.5487
ENSRNOG00000004581	13.7762	13.3971	13.6198	13.5877	13.3685	13.395	13.298	13.6452	13.5481	14.2424	13.6035	13.558	13.7495	13.4317	13.6964	13.6263	13.4235
ENSRNOG00000004583	7.22441	7.56589	7.60999	7.86557	7.67943	7.61663	7.67887	7.79949	7.76952	7.72362	6.8736	7.55295	7.82077	7.26553	7.32829	7.36596	8.11403
ENSRNOG00000004610	11.3522	11.1297	10.4371	10.7083	10.9929	11.0983	11.2026	11.1951	11.7473	10.5046	12.5198	11.0723	11.3234	11.2307	11.3783	11.5216	10.3445
ENSRNOG00000004612	14.0334	13.9587	14.0369	14.0441	14.1545	14.1185	14.1296	13.8857	13.8265	14.0137	13.7781	14.0572	14.0647	14.0744	14.0294	13.9016	13.9562
ENSRNOG00000004613	15.2576	15.3182	15.194	15.3718	15.1492	15.2257	15.0468	15.194	15.3045	15.3401	15.3154	15.2661	15.5002	15.261	15.1173	15.2261	15.142
ENSRNOG00000004616	13.7845	13.7219	13.8722	13.7952	13.7527	13.6025	13.5174	13.4937	13.579	13.6077	13.5948	13.7393	13.703	13.6787	13.7432	13.5961	13.6513
ENSRNOG00000004621	12.7688	12.3171	12.6571	12.339	12.4136	12.8004	12.9495	12.784	12.6903	12.7853	12.5943	12.5915	12.6077	12.6879	12.7319	12.4121	12.7551
ENSRNOG00000004624	12.857	12.3126	12.8134	12.5881	12.8212	12.4904	12.3254	12.2601	12.3558	12.5121	12.5085	12.6558	12.83	12.6364	12.5534	12.3705	12.341
ENSRNOG00000004626	5.27878	6.08231	5.31759	5.52173	5.59135	5.24355	5.5596	5.43468	4.98366	5.67786	4.92907	5.54556	5.4366	5.99285	5.44527	4.88077	5.41992
ENSRNOG00000004628	13.3232	13.3053	13.3498	13.2981	13.591	13.625	13.7063	13.5999	13.4799	13.4791	13.4807	13.4395	13.5916	13.4171	13.454	13.4426	13.4536
ENSRNOG00000004632	8.09725	7.22856	8.24276	7.7903	8.31576	7.45143	7.4635	7.72475	7.47669	7.47669	7.65556	7.89809	8.09968	7.55415	8.30293	7.25668	7.49471
ENSRNOG00000004637	13.4567	13.1582	13.3592	13.2544	13.3771	13.4152	13.3677	13.169	13.2501	13.3077	13.2262	13.3354	13.3204	13.3341	13.3435	13.3077	13.232
ENSRNOG00000004640	9.94721	10.4864	9.85916	10.7005	9.84082	9.84477	10.6316	10.4825	10.3353	9.46852	9.97825	10.0367	9.54831	9.88837	10.2146	10.0046	10.9962
ENSRNOG00000004641	10.0187	10.7358	10.5211	9.74021	10.9463	10.6051	11.1971	11.2424	10.6574	11.2653	10.9118	10.516	10.2364	10.9253	10.9146	10.9595	10.4102
ENSRNOG00000004645	5.64262	5.53042	5.94899	4.28054	5.87011	6.42268	6.02781	5.93976	5.80322	6.02293	6.43239	5.72203	5.76448	6.20319	5.83525	5.78762	5.41126
ENSRNOG00000004646	6.50179	7.77827	6.93638	7.02889	6.9122	6.83084	6.90084	6.77658	7.55479	6.83358	6.97713	7.01863	7.21621	7.33757	6.62552	6.91616	6.92823
ENSRNOG00000004647	5.7257	5.89555	5.63818	5.66343	5.36464	5.35326	5.20906	5.6373	5.50521	5.68389	5.38208	5.65408	5.79659	5.53027	5.9191	4.99425	5.57557
ENSRNOG00000004649	6.56512	5.39245	5.58312	5.13903	5.80873	6.37667	5.26741	5.52091	6.23781	5.87798	5.57537	5.7668	5.75476	5.54158	5.73973	6.2297	5.53215
ENSRNOG00000004650	9.65768	10.9429	9.82494	10.5241	9.6418	10.0017	11.243	10.9053	10.9274	10.9825	10.8194	10.2417	10.4849	10.5544	10.5426	10.3204	10.431
ENSRNOG00000004659	11.4441	11.1685	11.4147	11.1776	11.2637	11.0833	10.9432	11.1738	11.1991	11.3341	11.1859	11.2411	10.9717	11.297	11.3496	11.4132	11.0683
ENSRNOG00000004666	8.82131	8.18479	8.59298	7.97166	8.28668	8.27661	8.3195	8.48364	8.39389	9.28087	8.75971	8.47697	9.00089	8.74498	8.4128	8.01065	8.26551
ENSRNOG00000004670	10.6901	10.9615	11.1369	10.573	10.7226	11.303	11.4984	11.2069	11.2099	11.3554	10.6963	10.9299	10.9221	11.0214	11.0388	10.7685	11.3488
ENSRNOG00000004672	11.7819	12.0377	11.9336	11.9544	12.0286	12.0206	12.0805	12.4448	12.4522	11.9288	12.0698	11.9943	12.0059	12.2248	11.9617	12.1531	11.9444
ENSRNOG00000004673	9.51019	8.71684	9.18627	9.50119	9.20724	8.99311	8.71986	8.86601	8.88506	8.89589	9.16752	9.18553	9.04204	9.21142	9.30144	9.42251	8.39357
ENSRNOG00000004676	13.3747	13.6747	13.5516	13.5445	13.5223	13.657	13.7622	13.6338	13.5216	13.3751	13.4942	13.5822	13.5266	13.6266	13.762	13.3762	13.5025
ENSRNOG00000004677	12.8178	13.0585	13.0956	12.4468	13.4277	13.2443	13.1776	13.4077	13.2435	13.5662	13.313	13.106	13.2632	13.3241	13.276	13.3012	12.6186
ENSRNOG00000004678	7.54651	7.99634	7.67306	7.14464	7.96907	8.29617	8.73643	8.35984	7.92114	7.47828	8.08354	7.90995	7.39805	8.81369	8.35203	7.77677	7.28744
ENSRNOG00000004687	8.71888	8.54055	8.23352	8.41062	8.61794	8.44661	8.36887	8.63587	8.57351	8.78551	9.11695	8.54434	8.88394	8.72244	8.32454	8.7054	8.26981
ENSRNOG00000004688	14.0196	14.2796	14.0713	14.2736	14.0251	14.0103	14.107	14.3948	14.1948	14.2955	14.1263	14.1393	14.2526	14.1107	14.2109	14.0096	14.219
ENSRNOG00000004692	6.17613	5.67929	5.65383	5.74506	5.90301	6.30283	5.89594	6.10922	6.02372	5.76936	6.07068	5.84327	5.38597	5.3122	6.43106	6.63436	5.87401
ENSRNOG00000004696	12.9213	12.5752	12.748	12.7287	12.9398	12.8758	12.6714	12.7274	12.633	12.6993	12.6654	12.805	12.8999	12.773	12.7837	12.69	12.6105
ENSRNOG00000004697	12.7241	12.9019	12.8675	12.9617	12.8724	12.8497	12.9291	12.9043	12.8472	12.6403	12.9049	12.8624	12.7934	12.9455	12.845	12.8665	12.8282
ENSRNOG00000004698	8.35289	8.65513	8.80815	7.88904	8.93995	9.1807	8.96679	9.01392	9.19637	8.7121	8.91001	8.71326	8.74274	8.91382	8.93695	8.92071	8.36375
ENSRNOG00000004699	9.79995	9.69254	9.2247	8.41159	8.97531	8.94965	9.84998	9.7574	10.0316	8.70115	10.205	9.32566	8.92243	9.87035	10.0844	8.64261	9.51516
ENSRNOG00000004703	5.14247	5.00662	5.3391	5.42596	5.79584	5.15643	5.29012	5.54556	5.44315	5.57328	5.62236	5.32219	5.36894	5.07166	5.59272	6.0406	4.85575
ENSRNOG00000004708	10.0159	10.0913	10.2569	10.9193	9.8683	9.90504	9.87143	10.112	9.79522	9.74087	10.1043	10.1583	10.0784	10.3584	9.93105	10.0458	9.95359
ENSRNOG00000004711	13.8238	13.8143	13.8121	13.9035	13.5834	13.7254	13.7207	13.6675	13.7406	13.7713	13.8809	13.7722	13.7438	13.8233	13.7202	13.7928	13.7606
ENSRNOG00000004713	11.6957	11.2084	11.7219	11.9131	10.8465	11.14	11.4097	11.2706	11.3812	9.91396	11.5412	11.5261	11.2336	11.6918	12.2837	10.4959	10.8276
ENSRNOG00000004720	5.08595	5.07832	4.91052	4.99698	4.62633	4.67939	4.95318	4.97819	4.7745	4.85656	4.91469	4.91055	4.57043	5.52221	4.72481	4.70039	4.97032
ENSRNOG00000004723	12.1583	12.0199	12.2461	12.0782	12.2708	12.2698	12.0847	12.0263	12.041	11.8313	11.8852	12.1268	11.9812	12.0558	12.0611	12.0812	12.2615
ENSRNOG00000004725	4.90216	5.43022	5.46353	4.91771	4.96481	5.15488	4.81731	5.1627	5.0099	4.95649	5.20237	5.13619	4.96959	5.22195	5.20088	4.89821	5.18392
ENSRNOG00000004726	12.8292	12.6662	12.419	12.6659	12.543	12.6916	12.5486	12.4724	12.5173	12.8166	12.6829	12.6102	12.622	12.4308	12.6237	12.7983	12.6323
ENSRNOG00000004737	13.2666	12.8013	12.6855	12.4623	12.8555	12.6438	12.4447	12.2748	12.7491	12.8383	12.7179	12.7992	12.9311	12.698	12.8483	12.5596	12.5385
ENSRNOG00000004740	13.1048	12.8056	13.038	12.8255	13.0773	13.0432	12.9691	13.0814	13.0312	13.1302	12.892	12.9795	12.9604	12.9155	13.0451	13.0315	13.0346
ENSRNOG00000004741	14.4117	14.2395	14.2059	14.0825	14.3542	14.3784	14.32	14.0603	14.2499	14.0712	14.1981	14.262	14.2308	14.1641	14.2905	14.1796	14.3209
ENSRNOG00000004742	14.2896	14.4278	14.2524	14.3893	14.5183	14.496	14.514	14.3993	14.3028	14.3039	14.2256	14.379	14.3335	14.293	14.4109	14.4063	14.4312
ENSRNOG00000004749	11.4882	11.4324	11.6389	11.6853	11.8813	11.8832	12.0674	12.0881	11.9289	11.6943	11.7972	11.7132	11.8223	11.6709	11.9162	11.899	11.5535
ENSRNOG00000004752	12.6553	12.6006	12.6699	12.6928	12.6765	12.6412	12.8056	12.6937	12.5827	12.5473	12.5036	12.6493	12.4568	12.6652	12.7849	12.6194	12.6909
ENSRNOG00000004754	9.9199	6.8833	7.24762	8.15968	7.83892	7.61433	7.40119	7.5103	8.73386	7.61863	8.86634	7.88649	7.00146	7.10306	9.21011	9.86727	6.66762
ENSRNOG00000004755	12.4868	12.5849	12.4081	12.5372	12.3716	12.476	12.4526	12.3093	12.3999	12.2318	12.439	12.4631	12.3082	12.5534	12.4422	12.4536	12.3993
ENSRNOG00000004756	9.6419	9.10665	9.15288	9.98471	8.77065	8.68772	8.60423	8.74055	8.34792	8.58402	8.29128	8.97995	8.41224	8.42372	8.63905	8.68104	10.3969
ENSRNOG00000004757	11.6708	11.4114	11.7295	11.4755	11.1655	11.5402	11.2495	11.4225	11.7492	11.3959	11.4217	11.5271	11.6071	11.6691	11.4747	11.2591	11.3989
ENSRNOG00000004763	14.194	14.4089	14.2257	14.5302	14.3486	14.1756	14.6803	14.6199	14.4901	14.5096	14.5152	14.3718	14.5236	14.4892	14.4507	14.3153	14.3236
ENSRNOG00000004772	6.36661	4.57074	5.01318	5.64639	5.66417	5.54249	5.51256	5.50012	5.37487	5.5072	5.5586	5.43947	5.19855	5.68034	5.2728	6.16818	5.04659
ENSRNOG00000004775	11.9382	11.7651	12.0703	11.897	12.0508	12.1656	12.2519	11.9745	11.994	12.1472	12.1056	11.9703	12.0633	11.8909	11.8916	12.1408	12.1396
ENSRNOG00000004778	6.68672	5.70886	6.17637	5.89147	5.65032	5.71649	5.35171	5.32525	5.36791	5.57754	6.39086	5.94664	5.53889	6.3614	5.78923	5.89696	5.51891
ENSRNOG00000004781	13.6523	13.8099	13.7681	13.6797	13.6766	13.7481	13.9947	14.0063	13.9007	13.7331	14.0234	13.7378	13.6467	13.7761	13.8829	13.8129	13.9214
ENSRNOG00000004786	9.59709	9.67749	9.81292	9.82036	9.69781	9.76875	9.68346	9.54958	9.5187	9.39165	9.48128	9.69733	9.5344	9.50945	9.85767	9.62344	9.69308
ENSRNOG00000004789	11.2606	10.8465	11.2528	10.965	11.0101	10.8974	10.6982	11.1407	11.0884	11.162	11.1936	11.0342	10.9745	11.1053	10.9958	11.1496	11.0015
ENSRNOG00000004791	12.1445	11.8393	11.8666	11.7645	12.027	12.1278	12.1032	12.0012	12.0057	11.982	12.1012	11.968	11.982	12.018	11.9425	12.0283	11.9953
ENSRNOG00000004793	11.6884	11.5601	11.7243	11.792	11.5833	11.3751	11.6724	11.9619	11.8658	11.923	11.8894	11.6523	11.6646	11.7534	11.7291	11.8105	11.648
ENSRNOG00000004794	14.8783	15.0339	15.0076	14.8973	14.8996	14.9529	14.9123	14.9641	14.9266	14.9368	14.8176	14.9201	14.7976	14.912	14.9013	14.9104	15.1216
ENSRNOG00000004806	12.4099	12.3288	12.2093	12.3064	12.3125	12.3955	12.49	12.4921	12.3443	12.8877	12.3473	12.3817	12.6058	12.5252	12.3415	12.331	12.235
ENSRNOG00000004807	12.0046	11.8156	12.0027	12.1918	11.8325	11.9234	11.8524	11.7701	11.839	11.774	11.8432	11.9366	11.9132	11.947	11.7985	11.9256	11.9174
ENSRNOG00000004808	5.06735	4.85894	4.81618	4.71427	4.87754	5.08616	5.01335	5.47806	5.02507	5.35496	5.41668	4.98849	5.33138	4.63556	5.50903	4.85527	4.94527
ENSRNOG00000004810	12.6718	13.2918	13.1785	13.0293	13.2403	13.031	13.1336	13.424	13.2226	13.4184	13.2992	13.1053	13.2381	13.2133	13.0538	13.2687	13.0654
ENSRNOG00000004813	13.3083	13.1346	13.149	13.2668	13.1935	13.2394	13.1081	13.0257	13.1463	12.9266	13.0867	13.1802	13.1264	13.2068	12.9973	13.1709	13.2406
ENSRNOG00000004814	13.4565	13.4303	13.386	13.2919	13.336	13.3595	13.167	13.0362	13.2746	13.0046	13.3628	13.3349	13.2505	13.265	13.2383	13.2706	13.4186
ENSRNOG00000004820	13.6387	13.2441	13.4962	13.3854	13.4174	13.4733	13.3002	13.3363	13.3706	13.3979	13.4945	13.4046	13.1878	13.4211	13.3775	13.6913	13.3869
ENSRNOG00000004828	11.3756	11.9018	11.4735	11.114	11.8694	11.9683	12.2278	12.1216	12.2586	11.3623	11.9775	11.6825	11.4644	11.8633	12.1121	11.8985	11.5314
ENSRNOG00000004839	13.0125	13.3209	13.296	13.0154	13.5297	13.4894	13.6721	13.4816	13.4156	13.3495	13.5053	13.3045	13.2391	13.4203	13.4169	13.5525	13.1891
ENSRNOG00000004841	11.9272	12.108	12.1279	12.3103	11.9449	12.0539	12.4406	12.5886	12.2928	12.1768	12.0391	12.1313	12.0692	12.3368	12.3039	11.9971	12.1759
ENSRNOG00000004846	14.6639	14.5595	14.6128	14.7343	14.289	14.3874	14.1959	14.4749	14.5738	14.5304	14.4881	14.5238	14.4629	14.514	14.4905	14.5456	14.5053
ENSRNOG00000004852	5.39683	4.53538	5.04429	4.9485	4.72352	5.27891	5.009	5.23387	5.25225	4.93158	5.20145	5.08069	5.22066	5.25795	5.32013	4.92559	4.54632
ENSRNOG00000004854	8.47142	8.07404	8.47965	7.89682	7.88101	8.04473	7.45523	7.76932	7.73978	8.46094	7.95159	8.09271	7.95984	7.93455	8.09236	7.9623	8.1964
ENSRNOG00000004858	5.67627	5.79616	5.88757	5.80603	5.74693	6.05899	5.99311	6.01341	5.97501	5.84316	6.07575	5.76243	5.77226	5.79905	5.31856	6.08962	6.42691
ENSRNOG00000004860	12.9249	12.7584	12.5884	12.969	12.8156	12.573	12.819	12.872	13.0206	13.0518	13.1608	12.8109	12.981	12.7972	12.8907	13.1128	12.5263
ENSRNOG00000004863	12.7277	12.766	13.0824	12.4369	13.0834	13.2224	12.8885	12.9524	13.0406	13.2446	12.9944	12.8863	12.9439	12.9952	12.7189	13.2572	12.7923
ENSRNOG00000004870	10.3159	10.1946	10.5149	10.6682	10.1972	10.18	10.2007	10.4191	10.5593	9.95892	10.3814	10.2958	10.0238	10.2592	10.3085	10.6034	10.4186
ENSRNOG00000004873	11.0424	9.34598	9.54414	10.0976	9.21737	9.36881	9.19321	9.38853	9.67838	9.59392	9.74568	9.76088	9.66388	9.74895	9.81876	9.45581	9.65555
ENSRNOG00000004875	5.23414	5.17979	5.26379	5.2277	5.23365	5.16504	5.05711	5.41035	5.64726	4.96951	5.04776	5.20797	5.36285	4.89017	5.31459	5.03682	5.49479
ENSRNOG00000004878	6.13297	5.95605	5.83885	5.89785	6.16698	6.39736	6.46155	5.88116	6.15719	6.19983	5.83387	6.0719	5.73111	6.30372	6.22221	6.58127	5.57429
ENSRNOG00000004882	9.50898	8.7885	9.36915	9.13353	9.26359	8.99152	9.07791	9.11763	9.11523	9.79972	9.26359	9.29795	9.912	9.32627	9.38804	8.80262	8.72159
ENSRNOG00000004888	9.59343	9.91075	9.68432	10.023	9.63084	9.59785	9.77276	9.75229	10.108	9.91606	9.8807	9.74045	9.93571	9.63925	9.64888	9.96895	9.7995
ENSRNOG00000004890	10.9828	10.0722	10.64	11.0961	9.81202	9.72124	10.0179	9.77058	9.61698	9.68646	10.071	10.3347	9.68793	10.534	10.4662	9.85481	10.2528
ENSRNOG00000004891	10.9199	10.7639	10.8461	10.9462	10.8641	11.0975	11.2228	11.4301	11.1284	11.2883	10.8998	10.9683	11.1155	11.195	10.9668	10.9333	10.9333
ENSRNOG00000004893	9.436	9.40954	9.56395	9.31524	9.43859	9.77645	9.74075	9.53265	9.58862	9.44185	9.69685	9.52434	9.23813	9.87088	9.6703	9.85302	9.05848
ENSRNOG00000004898	5.91086	6.10525	5.35443	5.97845	5.77298	5.73276	5.68461	5.56333	5.66272	5.62034	5.46628	5.78552	5.74409	5.46051	6.01037	5.66284	5.7343
ENSRNOG00000004899	9.1926	10.4143	9.86308	10.6519	9.73522	9.74497	10.4261	10.5571	9.90816	9.55631	9.87367	9.86665	9.23784	9.81909	10.1408	10.2097	10.482
ENSRNOG00000004900	8.61956	8.86081	8.61226	9.88011	7.81178	8.32036	8.57187	8.55256	8.36507	7.51058	8.08744	8.56256	8.06953	8.25888	8.62978	8.05387	9.40244
ENSRNOG00000004903	10.5495	9.89974	10.406	9.76997	10.4253	10.6707	10.3898	10.3218	10.2692	10.4706	10.3877	10.2864	10.1632	10.3825	10.3104	10.5207	10.2192
ENSRNOG00000004904	13.8978	13.7729	13.8462	13.8394	13.956	13.9878	13.8779	13.7065	13.6882	13.7344	13.7042	13.8767	13.9549	13.8547	13.7803	13.7013	13.8393
ENSRNOG00000004909	13.5092	13.2599	13.5296	13.4257	13.6502	13.5625	13.5517	13.5033	13.4242	13.6236	13.4534	13.4955	13.5717	13.4917	13.4591	13.5687	13.4035
ENSRNOG00000004910	10.7863	10.4698	10.6754	10.6657	10.9429	10.9418	11.2339	11.038	10.9647	10.937	10.9411	10.7766	10.7503	10.9664	10.7911	11.1149	10.6819
ENSRNOG00000004918	11.9022	12.0778	12.1817	12.5021	12.1003	12.1714	12.2054	12.4013	12.1928	11.9326	12.1874	12.1371	12.0541	12.2052	12.0395	12.3454	12.1801
ENSRNOG00000004920	4.54266	5.04872	4.6567	5.01776	4.77446	5.19404	4.88148	4.64108	4.94695	5.76344	5.01653	4.87994	5.34437	4.64952	4.69122	5.52725	4.50912
ENSRNOG00000004925	12.5518	12.662	12.7611	12.7233	12.7597	12.7145	12.7548	13.0011	12.7397	12.8855	12.6965	12.7153	12.8142	12.5868	12.8648	12.6911	12.7724
ENSRNOG00000004926	9.77651	9.61273	9.66833	9.42626	9.77221	9.85433	9.83899	9.80573	9.7216	9.65769	9.7388	9.68694	9.24447	9.83438	9.99323	10.0519	9.43743
ENSRNOG00000004936	14.1572	13.8087	14.0101	13.9478	13.8415	13.8294	13.4111	13.7325	13.8466	13.9709	13.9023	13.8994	13.9121	13.7416	13.8459	14.0028	13.8205
ENSRNOG00000004938	4.15033	4.44675	4.38742	4.38394	4.50489	4.05382	4.20422	4.29226	4.26166	3.86422	4.22904	4.32428	4.44635	4.10916	4.43585	3.86951	4.44511
ENSRNOG00000004946	4.81905	4.85431	4.58641	4.70253	4.89864	4.88861	5.13614	4.96214	4.7609	5.11232	4.79031	4.84157	4.89386	4.91129	5.01943	4.79154	4.69336
ENSRNOG00000004958	4.76632	4.73869	4.93857	4.94277	5.24362	4.74165	4.71458	5.08378	4.68257	4.90124	4.74478	4.91475	4.83939	4.82597	5.19582	4.98372	4.50338
ENSRNOG00000004959	14.7103	14.5915	14.6846	14.5898	15.0987	15.0291	15.0319	14.9304	14.7953	14.9236	14.9268	14.7766	15.0122	14.7845	14.4888	14.937	14.9683
ENSRNOG00000004962	11.4185	11.4179	11.4237	11.6777	11.0883	11.3248	11.3214	11.3899	11.3285	11.3805	11.4001	11.4015	11.3595	11.4791	11.4238	11.3325	11.3145
ENSRNOG00000004964	11.6622	10.9619	11.6579	10.9478	11.4488	11.471	11.4168	11.5721	11.3289	11.9863	11.4094	11.4827	11.9738	11.7586	11.4623	10.8661	11.1739
ENSRNOG00000004972	9.33859	8.97285	9.63564	9.02897	9.47756	9.39349	9.06731	9.60148	9.27283	9.18083	9.29831	9.2918	9.21714	9.40038	9.16158	9.24443	9.45871
ENSRNOG00000004978	14.526	14.6219	14.4545	14.7326	14.4966	14.5567	14.8258	14.7051	14.4906	14.5603	14.4862	14.5539	14.6582	14.4654	14.4731	14.3039	15.0142
ENSRNOG00000004989	6.40904	6.82002	6.75032	6.34265	6.54093	6.31701	6.45194	6.16529	6.55852	6.74783	6.21409	6.53547	6.64305	6.73924	6.25698	6.16512	6.64395
ENSRNOG00000004992	14.5677	14.4292	14.468	14.6667	14.4237	14.4665	14.4165	14.3593	14.4116	14.3704	14.4443	14.499	14.46	14.4836	14.5258	14.5132	14.3263
ENSRNOG00000004993	4.87595	6.1473	5.45956	5.55406	5.11842	5.00651	5.05013	5.17933	5.40673	5.65694	5.54721	5.27215	5.14656	5.26508	4.8759	5.65131	5.8253
ENSRNOG00000004996	12.315	12.2332	12.3038	12.2481	12.1682	12.2124	12.0889	11.9145	12.0204	11.9626	12.0125	12.2064	11.9361	12.2673	12.1732	12.1789	12.1602
ENSRNOG00000004998	13.347	13.5625	13.4007	13.5793	13.58	13.6221	13.7007	13.4681	13.5282	13.2771	13.4058	13.5088	13.4854	13.4193	13.5825	13.522	13.4846
ENSRNOG00000005003	13.5718	12.9789	13.1134	13.5123	12.6928	12.992	13.3561	13.4379	13.0286	13.0138	13.3496	13.1766	12.8791	13.604	13.2457	12.9619	13.2343
ENSRNOG00000005007	11.706	11.4986	11.7797	11.6337	11.1724	11.2659	10.9486	11.5827	11.3912	11.3122	11.5473	11.4861	11.2193	11.6465	11.4525	11.3625	11.5462
ENSRNOG00000005012	9.99535	9.78801	10.033	9.95711	10.0486	10.0308	9.94618	9.74904	9.78808	9.78332	9.76417	9.9683	9.85832	10.105	9.89851	9.94761	9.725
ENSRNOG00000005015	12.6722	12.5527	12.6505	12.6149	12.8159	12.6412	12.9016	12.8681	12.6625	12.7466	12.6376	12.6848	12.7136	12.8167	12.6858	12.5734	12.7268
ENSRNOG00000005018	13.4945	13.7883	13.584	13.7677	13.5138	13.5632	13.6327	13.7493	13.691	13.3222	13.7707	13.6295	13.558	13.7154	13.6806	13.5716	13.6031
ENSRNOG00000005021	11.3962	11.1646	11.2202	11.4167	11.2748	11.5858	11.5413	11.3459	11.1976	10.9759	11.3097	11.339	11.2107	11.4269	11.3553	11.3138	11.2682
ENSRNOG00000005024	9.80303	9.77467	9.83217	9.79502	9.7664	9.94379	9.96393	9.81595	9.72255	9.55679	9.90046	9.82515	9.6683	9.97039	9.87262	9.79688	9.73682
ENSRNOG00000005031	11.5198	11.6457	11.5839	11.5223	11.5794	11.5756	11.5495	11.4413	11.474	11.4439	11.5043	11.5458	11.473	11.5037	11.5086	11.5089	11.6692
ENSRNOG00000005033	12.3422	12.2756	12.5359	11.9136	12.7813	12.7809	12.7954	12.7437	12.7336	12.5529	12.7342	12.4678	12.4455	12.5047	12.631	12.7624	12.4128
ENSRNOG00000005034	13.9222	13.8512	14.0921	13.4798	14.084	14.0546	13.8233	13.8287	14.1468	13.9275	13.9275	13.9167	13.9226	14.0295	13.8143	14.0093	13.8294
ENSRNOG00000005039	12.2539	11.5111	11.9648	11.8016	12.2176	11.7945	11.8596	11.4667	11.7282	11.9573	11.9393	11.8802	11.8267	11.8132	11.7384	12.1661	11.7815
ENSRNOG00000005041	13.7025	13.6868	13.5604	14.2301	13.4455	13.2496	13.378	13.5518	13.538	13.3954	13.5637	13.5884	13.566	13.4658	13.3886	13.5709	13.8824
ENSRNOG00000005046	13.6432	13.5181	13.7022	13.5401	13.9026	13.8157	14.08	13.6775	13.6326	13.9685	13.5774	13.6933	13.6303	13.7415	13.7459	13.8607	13.6607
ENSRNOG00000005048	7.98954	9.33467	8.18999	9.12752	7.55872	8.49097	10.2172	9.86846	9.40997	8.0091	9.89156	8.59953	8.27788	9.18897	9.23751	8.41467	9.27579
ENSRNOG00000005052	10.4661	10.5761	10.5677	10.7909	10.5778	10.6208	10.9978	11.005	10.7726	10.9282	10.8352	10.6253	10.7009	10.7189	10.6087	10.8194	10.7826
ENSRNOG00000005053	9.92686	9.07184	9.65437	9.22106	9.3882	9.5347	9.20448	9.25279	9.14338	9.53333	9.39433	9.49688	9.66962	9.69724	9.30802	9.01399	9.33938
ENSRNOG00000005061	13.9722	13.8276	13.6993	14.1391	13.3689	13.3915	13.4036	13.8886	13.8474	13.7574	13.8875	13.7088	13.6294	13.605	13.7464	13.7727	13.945
ENSRNOG00000005063	13.6844	13.9799	13.9032	13.8635	13.8628	13.9565	14.2178	14.3354	14.0997	14.0428	14.048	13.8946	13.7643	14.015	14.0222	14.0692	14.0637
ENSRNOG00000005064	13.1877	13.1431	13.0937	13.235	13.1407	13.0533	13.1749	13.026	12.9469	13.0013	13.2058	13.1495	13.1168	13.2222	13.1528	13.0426	13.0385
ENSRNOG00000005067	11.0822	10.9584	11.0103	11.0636	10.553	10.8007	11.0696	11.3825	11.4164	11.5538	11.2993	11.0002	11.2963	11.0501	11.1875	10.9146	11.0275
ENSRNOG00000005074	11.4094	10.9462	11.1031	11.1233	11.3674	11.3825	11.1182	10.9854	11.1458	11.0232	11.086	11.1879	11.0513	11.0642	11.2439	11.4758	10.9538
ENSRNOG00000005081	11.5192	11.2982	11.2716	11.4584	11.1801	11.0877	11.2361	11.462	11.3603	11.6907	11.3453	11.3203	11.3301	11.3521	11.3852	11.3567	11.332
ENSRNOG00000005083	12.8071	12.6552	12.7653	12.7766	12.6177	12.6872	12.6861	12.6576	12.7216	12.6132	12.7396	12.6941	12.6144	12.6735	12.6501	12.7282	12.8411
ENSRNOG00000005096	11.9547	11.8008	11.8456	11.4726	12.266	12.3306	12.3813	12.0566	11.9882	11.953	12.1442	11.9594	11.7857	12.1835	11.9948	12.2751	11.814
ENSRNOG00000005108	13.7522	13.6274	14.1915	14.0726	13.7902	13.4932	13.7263	12.8905	13.0727	14.2674	14.0686	13.7269	13.5792	13.7394	13.2966	14.2952	13.7067
ENSRNOG00000005109	8.9623	8.03368	8.64278	10.4115	7.13336	7.1919	8.27492	8.66036	8.31034	7.03378	8.56282	8.28855	8.02374	7.62015	8.57763	7.44826	9.79043
ENSRNOG00000005126	9.722	8.44667	8.7266	8.84731	8.84209	9.03114	8.29042	8.36468	8.6437	8.98944	8.93566	8.83825	8.34019	8.63099	8.95724	9.74856	8.36185
ENSRNOG00000005130	13.8695	13.6946	13.6911	13.8406	13.694	13.7319	13.7747	13.7178	13.8008	13.6589	13.7978	13.7576	13.7274	13.7459	13.8229	13.7909	13.6761
ENSRNOG00000005132	9.60033	9.59301	9.60933	9.6911	9.74547	9.62832	9.43314	9.85729	9.73676	9.45076	9.71374	9.62932	9.59925	9.45299	9.74412	9.79493	9.61001
ENSRNOG00000005133	14.1616	14.2755	14.324	14.2961	14.258	14.3363	14.2911	14.4084	14.4005	14.373	14.2569	14.302	14.4746	14.3113	14.2808	14.2144	14.2526
ENSRNOG00000005138	11.4562	11.5764	11.5016	11.9726	11.4362	11.6164	11.6078	11.4845	11.4144	11.4191	11.4969	11.5583	11.4699	11.4494	11.5457	11.7162	11.5467
ENSRNOG00000005144	11.044	10.4915	10.8515	10.9495	10.6051	10.7337	10.6011	10.499	10.7147	10.4766	10.7981	10.7349	10.5827	10.6868	10.6694	10.883	10.725
ENSRNOG00000005149	12.3406	11.8762	12.1392	12.2947	11.7673	11.8934	11.8026	11.9022	11.8039	12.0317	12.0215	12.0294	11.9864	11.9675	11.9997	11.8886	12.1248
ENSRNOG00000005151	11.8411	11.4551	11.7741	11.6636	11.9124	11.9487	11.7689	11.5574	11.7166	11.6811	11.7682	11.7664	11.7792	11.6626	11.8604	11.9831	11.4095
ENSRNOG00000005157	14.1552	14.0436	14.0705	14.0298	14.1425	14.0766	14.0512	14.0477	14.1496	13.9501	14.1135	14.0699	14.1152	13.947	14.0491	14.0428	14.2199
ENSRNOG00000005167	12.6722	12.4704	12.7497	12.7284	12.49	12.4127	12.1635	12.245	12.2881	12.3551	12.38	12.5496	12.5174	12.4873	12.4187	12.3747	12.5137
ENSRNOG00000005185	8.6693	10.8929	8.98168	11.6693	8.23992	8.52343	10.8238	10.8671	9.94439	9.45434	10.031	9.27428	8.05617	8.84429	9.59152	10.277	12.0344
ENSRNOG00000005191	13.619	13.7208	13.4942	13.8989	13.6075	13.6399	13.8117	13.8485	13.6216	13.8617	13.6593	13.673	13.7587	13.6854	13.6326	13.6862	13.7542
ENSRNOG00000005195	15.4764	15.4969	15.506	15.3537	15.3973	15.4061	15.4701	15.506	15.4636	15.3464	15.4269	15.4639	15.4776	15.2819	15.7792	15.1623	15.5172
ENSRNOG00000005206	13.0549	13.0936	13.4869	13.0428	13.4121	13.481	13.5916	13.7552	13.5098	13.8796	13.6322	13.3079	13.4483	13.4509	13.3003	13.6565	13.3046
ENSRNOG00000005209	9.9763	10.3494	9.96535	10.0498	9.91113	10.1295	10.0314	10.1388	9.90775	9.9467	9.77968	10.0692	9.73624	10.1191	10.3865	9.94165	9.93228
ENSRNOG00000005214	9.99995	9.41557	9.77939	9.60963	10.0308	9.98349	9.74418	9.81847	9.70999	9.70644	9.777	9.82698	9.96577	9.70019	9.958	9.75241	9.54978
ENSRNOG00000005223	11.1625	10.9076	11.1974	11.4501	10.6491	11.0717	10.7901	10.712	10.7315	10.8091	10.9161	11.0653	10.8797	11.239	11.0308	11.0152	10.6335
ENSRNOG00000005229	8.48993	7.72471	7.95632	7.9997	8.25016	8.33	8.1704	7.97261	8.0307	7.8182	8.08419	8.14013	7.88961	8.19887	8.42188	8.34861	7.55587
ENSRNOG00000005233	9.93755	9.42242	9.94434	9.7613	9.8306	9.88571	9.58619	9.41688	9.62727	9.14934	9.65221	9.74823	9.47716	9.49682	9.97819	9.84304	9.53925
ENSRNOG00000005246	8.06089	7.33217	7.08485	6.71066	8.29397	7.95059	7.90722	8.4341	8.79968	7.20295	8.28668	7.65359	7.01022	8.00947	8.42949	8.87024	6.69824
ENSRNOG00000005247	12.182	11.8928	12.2602	12.2736	11.8273	11.9059	11.7307	11.7445	11.8347	11.6798	11.915	12.001	11.8499	11.9375	11.8797	11.8881	12.144
ENSRNOG00000005248	13.4655	13.8489	13.3955	13.6973	13.5218	13.4563	13.8948	13.9818	13.8545	13.6943	13.9513	13.6393	13.8399	13.639	13.8894	13.4865	13.6335
ENSRNOG00000005250	7.78325	6.84975	7.62703	7.23339	7.96815	7.7028	7.7362	7.35618	7.4323	8.0482	7.63428	7.50937	7.70905	7.28307	7.42789	7.96521	7.46903
ENSRNOG00000005256	13.4298	13.3734	13.489	13.3665	13.503	13.5429	13.4009	13.2048	13.2794	13.086	13.138	13.4138	13.2017	13.3423	13.4754	13.3541	13.4004
ENSRNOG00000005260	12.1611	11.9332	12.1496	12.0887	11.813	11.8644	11.7599	11.7815	11.9409	11.7372	11.9059	11.9901	11.8442	12.0094	12.0475	11.8477	11.8994
ENSRNOG00000005264	10.712	10.3321	10.4768	10.3289	10.706	10.6309	10.6184	10.497	10.755	10.562	10.7573	10.539	10.4804	10.5787	10.605	10.9247	10.2852
ENSRNOG00000005268	5.61129	5.92966	5.40068	5.49609	5.79044	5.98406	5.72419	5.89978	5.90039	5.49687	5.81434	5.70274	5.72952	6.08997	5.29295	5.81464	5.71368
ENSRNOG00000005270	8.54031	8.31778	8.81701	8.58369	8.76848	8.90349	8.47979	8.45838	8.33987	8.25699	8.21661	8.68963	8.77057	8.6895	8.81579	8.30144	8.10944
ENSRNOG00000005271	11.7381	12.1077	12.1589	12.0902	12.3552	12.3541	12.6753	12.5497	12.3092	12.4806	12.4463	12.168	12.4033	12.2428	12.0618	12.3934	12.3056
ENSRNOG00000005274	10.2296	10.2264	10.3648	10.1611	10.0393	10.2089	10.1841	10.181	10.4613	10.1452	10.3311	10.1855	9.91325	10.3433	10.1827	10.4947	10.1905
ENSRNOG00000005275	8.83649	8.63235	9.19959	8.41893	9.28208	9.35944	9.36925	9.13775	9.14698	8.90501	9.26057	9.01067	8.94935	9.38639	9.03142	9.20854	8.65008
ENSRNOG00000005276	13.7816	13.7236	13.712	13.906	13.2862	13.8893	13.4623	14.1368	13.8387	14.0655	13.8844	13.7421	13.8503	13.5903	13.9398	13.8422	13.6973
ENSRNOG00000005277	7.46734	8.21319	8.04044	8.22536	8.24557	8.32519	8.28707	8.26736	8.12765	7.2868	7.8993	8.14013	8.13922	8.25398	8.35091	7.87259	7.62149
ENSRNOG00000005279	11.8946	11.6957	12.0049	11.8874	11.8436	11.9634	11.9668	11.9604	11.9388	11.7185	11.8245	11.8471	11.5814	11.8966	11.8566	12.0542	11.9989
ENSRNOG00000005284	13.5254	14.0858	13.9806	13.6589	14.2171	14.1621	14.4099	14.0675	14.0613	14.1406	14.1983	13.9632	13.8628	14.0887	14.0874	14.3578	13.7843
ENSRNOG00000005290	15.3896	15.3115	15.3595	15.3469	15.3469	15.3099	15.324	15.2894	15.2047	15.2605	15.3469	15.3495	15.1298	15.6237	15.3281	15.4299	15.0941
ENSRNOG00000005291	11.688	11.7018	11.899	12.216	11.3128	11.4666	11.4148	11.3521	11.3252	11.6473	11.3737	11.7038	11.8866	11.6874	11.4761	11.1776	11.7536
ENSRNOG00000005298	11.8051	11.7851	11.9497	11.848	12.2408	12.0552	12.222	12.0687	12.0589	11.9485	11.8617	11.9693	12.1024	11.9816	11.9555	11.9609	11.9186
ENSRNOG00000005299	13.771	14.3692	14.0628	14.3978	13.9345	13.9345	14.2518	14.2326	14.062	14.2513	14.0387	14.0568	14.0666	13.9371	14.0382	14.0524	14.4622
ENSRNOG00000005301	12.6495	12.6236	12.7279	12.6944	12.8097	12.8314	12.8174	12.6614	12.6689	12.6503	12.6421	12.7184	12.7451	12.5543	12.8294	12.7284	12.6845
ENSRNOG00000005307	13.4548	13.5074	13.3937	14.0493	13.3829	13.457	13.8726	13.9154	13.6855	13.6887	13.6646	13.5372	13.4827	13.463	13.6438	13.8314	13.7302
ENSRNOG00000005308	14.3884	14.3907	14.3859	14.5051	14.3623	14.439	14.2745	14.3482	14.3443	14.2704	14.2973	14.4011	14.3196	14.3548	14.4644	14.4568	14.2476
ENSRNOG00000005309	11.58	11.9021	12.0392	11.6117	12.0349	12.1224	12.4863	12.5465	12.1152	12.4288	12.3385	11.9584	11.9984	12.1758	12.1611	12.1543	11.9677
ENSRNOG00000005326	13.5961	13.7126	13.641	13.8319	13.7491	13.8869	13.9985	13.8191	13.7784	13.4589	13.7038	13.7217	13.5952	13.6953	13.7872	13.832	13.7939
ENSRNOG00000005330	9.091	9.23104	8.99191	8.04131	8.9615	9.00369	10.2258	9.90969	9.72502	10.3176	9.64561	8.99178	8.6506	8.94807	10.0069	9.38315	9.66397
ENSRNOG00000005331	12.1146	11.9605	11.9364	12.0703	11.7944	11.9115	12.0455	12.1688	12.0745	12.0316	11.8872	11.9504	11.7482	12.0067	12.0108	12.0034	12.1992
ENSRNOG00000005333	13.1104	12.983	13.1446	12.969	13.0754	13.059	13.1813	13.3288	13.1913	13.4453	13.2789	13.0921	13.2087	13.1312	13.1472	13.1402	13.1347
ENSRNOG00000005334	11.4628	11.9801	11.7361	12.3028	11.6914	11.8092	12.2486	12.2791	11.9104	11.8988	11.8815	11.8086	11.7079	11.8256	11.7612	12.0294	12.2414
ENSRNOG00000005335	10.6704	10.1635	10.3443	10.897	9.53714	9.67256	9.43971	10.0303	9.68044	10.1902	9.88175	10.1484	10.0596	10.0072	9.98355	9.65591	10.5858
ENSRNOG00000005336	5.49952	5.76912	5.59747	5.16157	5.42285	5.4476	5.48006	5.33331	5.67379	5.79959	5.8171	5.47703	5.45453	5.44529	5.49531	5.65799	5.63389
ENSRNOG00000005338	8.19964	8.30193	8.22964	8.54595	8.60565	8.11257	9.93737	9.96589	9.39435	8.76975	9.38038	8.46905	8.31781	8.49252	9.41577	8.90122	8.93136
ENSRNOG00000005342	10.8197	10.6989	10.3093	11.9896	9.54234	9.73284	10.6887	11.0346	10.1798	9.98145	10.6794	10.4359	10.049	10.2467	10.5348	9.96816	11.7255
ENSRNOG00000005343	6.63747	6.64477	6.61437	6.74895	6.07064	6.55276	6.49505	6.57154	6.48981	6.7518	6.28523	6.56664	6.73277	6.51307	6.58502	6.04812	6.80596
ENSRNOG00000005344	11.3616	11.4879	11.4237	11.617	11.3971	11.567	11.6537	11.4031	11.3687	11.2622	11.3025	11.4739	11.2672	11.6125	11.5316	11.4991	11.3118
ENSRNOG00000005345	14.5184	14.3607	14.4276	14.713	14.2947	14.1196	14.4139	14.3189	14.2742	14.2972	14.2703	14.3763	14.3274	14.361	14.2647	14.1888	14.6873
ENSRNOG00000005355	13.0655	12.7073	12.9546	13.0095	12.8131	12.8904	12.7753	12.7697	12.8533	12.9551	12.9856	12.8741	12.784	12.8019	12.8403	13.1608	12.8492
ENSRNOG00000005358	13.9491	13.7332	13.943	13.9577	13.8957	13.9085	13.8094	13.7689	13.7648	13.6292	13.7819	13.88	13.7732	13.922	13.8378	13.8601	13.7915
ENSRNOG00000005360	11.639	11.5403	11.7128	11.5475	11.7751	11.733	11.6845	11.5042	11.4652	11.432	11.5247	11.6329	11.3673	11.6794	11.7014	11.7399	11.515
ENSRNOG00000005362	11.9403	11.5206	11.7259	11.4631	11.8249	11.8964	11.7235	11.9289	11.8863	11.7723	11.8791	11.729	11.4913	11.8164	11.8824	12.098	11.5739
ENSRNOG00000005365	8.22652	6.62852	8.40502	7.52658	7.85279	7.43014	7.45173	7.16951	6.97731	6.51904	6.77944	7.65799	7.11691	7.43293	8.30248	6.64494	7.48417
ENSRNOG00000005368	5.75524	5.42062	5.37022	5.61549	5.48829	5.29386	5.19857	5.32429	4.99518	5.6563	5.59591	5.4806	5.60211	5.32188	5.45765	5.34957	5.44273
ENSRNOG00000005369	11.1884	11.5191	11.3815	11.1801	11.0641	11.4792	11.779	11.4412	11.4559	11.5226	11.6	11.3206	11.0463	11.6004	11.4265	11.5394	11.4242
ENSRNOG00000005374	10.9013	10.8316	11.083	10.9263	10.601	10.7595	10.62	10.9303	11.025	10.7652	10.9318	10.8353	10.6187	10.9658	10.8305	10.9742	10.862
ENSRNOG00000005378	10.085	10.2628	10.0374	10.0219	10.4891	10.5697	10.5794	10.2835	10.2522	10.0431	10.0754	10.281	10.3638	10.2045	10.4953	10.1202	10.0646
ENSRNOG00000005379	6.72422	7.54426	7.31747	7.89312	7.20385	7.45271	7.66013	7.21406	7.5195	7.00043	6.4084	7.24654	6.97505	7.15209	6.95612	7.42632	7.81361
ENSRNOG00000005386	11.4575	10.2092	10.6678	10.6333	10.5235	10.5747	10.2684	10.5433	10.6256	10.7136	10.5641	10.6408	10.7142	10.6162	10.3707	10.4644	10.9313
ENSRNOG00000005389	14.7688	14.7607	14.7773	14.8699	14.349	14.4718	14.3724	14.6234	14.6333	14.6988	14.7374	14.6691	14.6969	14.5054	14.8223	14.506	14.696
ENSRNOG00000005390	9.97138	9.71734	9.9868	10.0958	9.84997	9.8043	9.97049	10.2392	9.89464	10.0701	10.2822	9.87583	9.66604	9.97146	9.81935	10.3285	10.0931
ENSRNOG00000005392	6.92382	5.13139	7.13215	6.28546	6.3803	6.78975	6.27663	6.055	6.3382	6.27766	6.2577	6.34719	6.32933	6.07061	6.0819	6.5994	6.66631
ENSRNOG00000005393	11.5234	11.3226	11.6044	11.2293	11.4047	11.3654	11.134	11.2748	11.2993	11.916	11.4683	11.4328	11.563	11.5182	11.3644	11.4762	11.1548
ENSRNOG00000005397	12.8383	12.5654	12.8594	12.8268	12.7346	12.8764	12.834	12.7793	12.8149	12.6895	12.9715	12.7896	12.7703	12.871	12.7646	12.9432	12.6407
ENSRNOG00000005398	4.71374	4.86724	4.63842	4.74038	4.91136	4.66727	4.64249	4.48953	4.36298	4.78272	4.912	4.7872	5.16745	4.69216	4.68675	4.4329	4.58432
ENSRNOG00000005403	5.76725	6.91373	6.17941	6.34489	6.2344	5.74546	6.06685	6.26407	6.54846	6.39166	6.83508	6.21608	6.4513	6.26582	6.04249	6.41857	6.26796
ENSRNOG00000005404	13.2394	13.1007	13.3465	13.3464	13.317	13.2605	13.5604	13.6438	13.2633	13.8984	13.6369	13.2971	13.3963	13.4444	13.2226	13.5998	13.3605
ENSRNOG00000005406	13.1141	13.12	12.8869	13.1568	13.1014	13.1985	13.3344	13.3531	13.2372	13.2887	13.2771	13.1197	13.2441	13.0095	13.246	13.2361	13.1633
ENSRNOG00000005407	5.87005	6.17029	6.10151	6.28219	6.46798	5.87568	6.09326	6.01444	5.79802	5.97193	5.68049	6.15786	6.21547	6.07522	6.36236	5.79363	5.77837
ENSRNOG00000005410	7.71108	6.84679	7.49351	7.14074	6.95971	7.56504	6.91573	7.37192	7.71141	7.46997	7.74763	7.38462	7.52898	7.80746	7.40824	7.64596	6.41355
ENSRNOG00000005412	5.12913	5.58777	5.04785	5.54817	4.97986	5.23033	5.24961	4.79542	5.07437	5.58557	5.00875	5.31199	5.41517	4.98112	5.88853	5.24195	4.55516
ENSRNOG00000005413	12.0915	11.3063	11.6764	11.1718	11.8397	11.9877	11.7312	11.1467	11.6297	12.2339	12.2859	11.674	11.5357	11.7266	11.7306	12.6422	11.0096
ENSRNOG00000005418	13.0378	12.9814	13.0547	13.198	12.9725	13.0575	13.0892	13.1248	13.1842	12.9858	13.2567	13.0456	13.088	13.0623	12.9587	13.2079	13.0875
ENSRNOG00000005420	5.9773	5.97986	5.50355	5.87308	6.20542	6.17072	6.15985	5.79478	6.26653	5.62938	5.46363	5.94174	5.95159	5.57384	6.2403	6.02422	5.78473
ENSRNOG00000005424	11.9683	11.5083	11.9138	11.74	11.781	11.8871	11.7856	11.6684	11.7159	11.8132	11.9032	11.7648	11.5154	11.7443	11.8249	12.1571	11.6911
ENSRNOG00000005426	11.0859	10.9996	11.2564	10.9904	11.1213	11.0949	11.3715	11.3122	11.2716	11.1077	11.2183	11.0919	10.8366	11.1936	11.2483	11.2725	11.2361
ENSRNOG00000005428	13.9215	13.8732	13.8364	13.9026	13.8335	13.8329	13.7758	13.9132	13.9544	13.7953	14.0808	13.8672	13.8809	13.8603	13.8639	13.9776	13.8254
ENSRNOG00000005431	4.28123	4.64093	4.31514	4.14127	4.58573	4.4249	4.657	4.38815	4.36946	4.37988	4.3948	4.4468	4.49108	4.54499	4.59594	4.15228	4.31519
ENSRNOG00000005434	14.788	14.6083	14.6234	14.7721	14.9056	14.8637	14.722	14.751	14.7585	14.743	14.7867	14.7627	14.9371	14.7207	14.6451	14.8686	14.6149
ENSRNOG00000005437	12.5755	12.4911	12.5559	12.7135	12.4766	12.5238	12.3748	12.2157	12.3258	12.0689	12.4559	12.5364	12.3702	12.5956	12.5255	12.4979	12.2436
ENSRNOG00000005438	13.8722	13.8466	13.8426	13.8107	13.7055	13.7407	14.0301	14.1134	14.0644	13.9168	13.9149	13.8256	13.7562	13.9262	13.9299	13.7841	14.0422
ENSRNOG00000005446	11.27	12.032	11.311	11.5805	11.4395	11.8289	12.4511	12.3141	12.2716	12.4664	12.1724	11.7029	11.9686	12.0046	11.8915	12.0169	11.5952
ENSRNOG00000005457	10.9211	11.798	11.9426	11.5733	11.9998	12.1884	11.9697	11.9872	11.6311	11.2237	11.4657	11.6949	11.6303	11.3846	11.8159	11.6494	12.017
ENSRNOG00000005465	7.39613	7.63743	7.22601	7.09162	8.15865	8.21934	8.34963	7.9636	7.92689	7.78524	8.05544	7.64522	8.19492	7.3847	7.49815	7.77636	8.05699
ENSRNOG00000005469	6.68312	7.34703	7.22141	6.85929	7.1696	6.85385	7.0155	6.62725	6.67232	7.1008	6.82334	7.05978	7.30296	7.46426	6.63654	6.45075	6.93076
ENSRNOG00000005470	9.12764	9.39125	9.21538	9.61517	9.30238	9.24948	9.80245	9.98664	9.63906	9.94115	9.67039	9.39399	9.57734	9.74013	9.32715	9.62148	9.34667
ENSRNOG00000005472	11.58	11.5098	11.6447	11.5818	11.6393	11.4841	11.6266	11.709	11.6037	11.9716	11.5857	11.5997	11.8091	11.6073	11.541	11.5225	11.6545
ENSRNOG00000005478	13.4246	12.8457	13.5185	12.5704	13.6453	13.4251	13.2508	13.1014	13.2186	13.8238	13.484	13.2693	13.3368	13.3177	13.3392	13.6147	12.8764
ENSRNOG00000005480	13.4074	12.786	13.2271	12.7553	13.4054	13.2034	12.9024	12.7389	12.9242	13.1796	12.8176	13.1392	13.296	13.1385	13.0342	12.9063	12.8474
ENSRNOG00000005483	10.5218	10.1998	10.5276	10.4894	10.773	10.667	10.6898	10.7536	10.5942	10.4528	10.7496	10.5346	10.5464	10.476	10.6103	10.826	10.4296
ENSRNOG00000005492	13.8915	13.9093	14.0013	14.7659	13.2555	13.1452	13.6915	13.696	13.9954	13.0594	13.8927	13.7603	13.5935	13.5949	13.6857	13.5033	14.4004
ENSRNOG00000005496	12.6854	12.7254	12.6756	12.7889	12.4515	12.4488	12.4345	12.4637	12.5592	12.5613	12.4164	12.6149	12.506	12.6116	12.6409	12.4818	12.613
ENSRNOG00000005498	5.76314	5.94988	5.6367	6.05127	5.89209	5.73452	5.7514	6.04588	5.91244	5.74951	5.65673	5.79651	5.65544	5.23596	6.24963	6.0023	5.992
ENSRNOG00000005524	11.4807	11.4159	11.5229	11.4615	11.3549	11.4537	11.4098	11.3712	11.4298	11.2817	11.3566	11.4392	11.3087	11.4787	11.4759	11.3897	11.426
ENSRNOG00000005539	9.85418	9.64455	9.76943	9.51126	10.0095	10.1488	10.1362	9.94618	9.83601	9.84804	9.99581	9.83389	9.61122	10.0704	9.88568	10.1918	9.62121
ENSRNOG00000005542	5.07714	4.62222	4.77277	4.40172	4.33005	4.75538	4.86556	4.64552	4.79434	4.63011	5.04746	4.73149	4.47005	5.49934	4.65472	4.60471	4.38698
ENSRNOG00000005551	12.8523	12.6631	12.8599	12.6448	12.8454	12.9755	12.7869	12.6779	12.7423	12.8644	12.8717	12.7837	12.7699	12.6434	12.7993	12.974	12.7974
ENSRNOG00000005561	13.8124	13.8494	14.1174	14.0086	14.066	14.0768	14.0588	13.9365	13.9325	14.0992	13.9997	13.9937	14.0091	14.0354	13.9683	14.1883	13.778
ENSRNOG00000005565	7.88366	7.66731	7.94052	7.76602	8.05137	8.07215	7.83745	7.85732	7.57892	7.78315	7.63545	7.87498	7.53221	7.91449	8.0471	8.07551	7.585
ENSRNOG00000005575	7.95791	6.81354	7.49514	7.61013	7.60274	7.72973	7.86965	8.05854	7.42117	7.56611	7.99625	7.59034	7.5144	7.77787	7.81157	7.7995	7.29923
ENSRNOG00000005577	14.2051	14.1057	14.214	14.0056	14.2597	14.2861	14.196	14.0897	14.0846	14.4793	14.2461	14.192	14.2671	14.2749	14.1102	14.3024	14.0294
ENSRNOG00000005578	8.80221	8.54497	8.72174	8.71048	8.91278	8.97456	9.11669	9.46589	9.12011	9.48148	8.94605	8.8732	9.05512	9.10807	9.02886	9.12084	8.52983
ENSRNOG00000005580	10.5018	10.0453	10.6185	9.25205	10.6847	10.4705	10.0272	10.314	10.9018	10.6401	10.9166	10.2777	10.6066	10.2052	10.115	10.6213	10.3677
ENSRNOG00000005587	14.2052	14.1434	14.3007	14.2022	13.9064	14.0385	14.042	14.1182	14.1773	14.0714	14.1727	14.123	13.8359	14.2305	14.2443	14.2306	14.0836
ENSRNOG00000005592	12.5673	12.9948	12.9427	12.7906	13.0634	13.3725	13.2641	13.2122	13.0695	12.9342	12.9209	12.9797	12.898	13.1147	13.0734	13.192	12.7625
ENSRNOG00000005600	11.2714	12.0358	11.375	12.4792	11.3741	11.3168	12.0221	11.9046	11.3937	11.589	11.6569	11.5561	11.1657	11.3874	11.5992	11.899	12.2497
ENSRNOG00000005602	12.4422	12.0632	12.3881	12.3248	12.3574	12.4091	12.1823	12.103	12.2067	12.2712	12.122	12.2902	12.2268	12.2151	12.1856	12.4326	12.2621
ENSRNOG00000005609	11.6536	11.5666	12.2138	10.8975	12.1216	12.2923	12.2858	12.0095	12.0094	12.0054	12.1002	11.8212	11.5369	12.1003	12.0086	12.1558	11.7535
ENSRNOG00000005610	13.2624	12.8883	13.0019	13.0449	13.0965	13.1931	12.9768	12.9316	13.0533	13.0087	12.9363	13.0417	12.9079	12.8989	13.0812	13.2841	13.0105
ENSRNOG00000005614	12.9988	12.7783	13.0235	12.9733	12.9872	12.9253	12.9157	12.7573	12.8532	12.6598	12.8307	12.9129	12.7321	12.9011	12.8967	12.9814	12.9176
ENSRNOG00000005615	12.1904	11.1771	12.3264	11.6497	12.0752	11.9212	11.4728	11.2871	11.3822	11.9761	11.857	11.8345	11.8428	11.6516	11.6756	12.0263	11.6305
ENSRNOG00000005618	11.1581	10.9097	11.2435	10.9648	10.8455	10.9652	10.6662	10.5157	10.8188	10.546	10.9805	10.9852	10.7935	11.0162	10.9706	10.8759	10.7806
ENSRNOG00000005620	8.64919	8.17152	8.14838	8.11531	8.57989	8.71677	8.78628	8.76024	8.54587	8.48275	8.59332	8.43462	8.32216	8.51769	8.69071	8.66579	8.28424
ENSRNOG00000005639	10.2481	10.3772	10.6256	9.4501	10.7474	10.8218	10.6994	10.4418	10.3448	10.2685	10.4753	10.4747	10.184	10.8861	10.9319	10.3138	9.76907
ENSRNOG00000005646	4.88269	5.40203	4.8396	4.92774	4.78244	5.30422	5.05338	4.99193	5.0196	5.39767	5.17214	5.07739	5.17338	5.34001	5.04442	5.152	4.646
ENSRNOG00000005650	9.03413	6.93702	7.94486	7.57187	7.28194	7.40895	6.64223	6.59267	7.88521	7.24755	8.33073	7.65267	7.1147	7.51733	8.06325	8.52175	6.52544
ENSRNOG00000005652	12.0074	11.2049	11.4799	11.7393	10.9968	11.2508	11.6451	11.6008	11.1385	11.6766	11.6064	11.4097	11.0807	11.5098	11.4173	11.353	12.0236
ENSRNOG00000005659	11.6504	10.1955	11.8687	8.92196	11.5655	12.2648	10.1539	10.8876	11.3364	9.83865	11.9405	11.4258	11.9643	12.0118	12.3893	10.2243	8.51532
ENSRNOG00000005660	4.98923	4.81583	4.63353	5.46874	5.1908	4.84598	5.29239	5.27298	4.96438	4.46623	4.68741	4.9398	4.94207	5.00585	4.56618	4.80639	5.49439
ENSRNOG00000005662	12.9029	13.0698	12.935	13.2253	13.224	13.2148	13.4849	13.4795	13.1412	13.1269	13.2907	13.0984	13.1025	13.1624	13.0493	13.3217	13.2611
ENSRNOG00000005664	5.14829	5.51358	5.0026	5.39222	5.17838	5.32126	5.00975	5.3877	5.08274	5.53949	5.33333	5.25303	5.28915	5.01871	5.41306	5.49575	5.09888
ENSRNOG00000005668	12.2019	12.3455	12.2946	12.2525	12.1248	12.1668	12.1596	12.3544	12.4856	12.0114	12.4781	12.253	12.2627	12.3552	12.2728	12.2076	12.2035
ENSRNOG00000005669	11.2026	11.1618	11.2748	11.301	10.8725	10.8349	10.8895	10.4889	10.7664	10.4823	10.6197	11.0865	10.7334	11.0258	11.3715	10.6202	10.8588
ENSRNOG00000005679	6.96323	8.03173	6.58735	9.85469	5.98423	6.22037	6.89182	6.80737	6.44993	6.4159	7.05123	6.97661	6.45174	5.98807	6.70804	7.41211	8.52914
ENSRNOG00000005687	4.56951	4.51541	4.36217	4.7844	4.26113	4.70446	4.36217	4.24327	4.38363	4.22572	4.5056	4.5246	4.40491	4.89749	4.22192	4.70287	4.05455
ENSRNOG00000005690	10.9284	11.0436	11.0396	11.0535	11.3186	11.1398	11.1252	11.2519	11.2185	10.7809	11.2366	11.1063	11.2429	11.0933	11.0966	11.0929	10.9927
ENSRNOG00000005691	9.80996	9.19433	9.42824	9.11279	9.6302	9.90489	9.7054	9.89173	9.80939	9.93126	9.75282	9.5477	9.53322	9.65935	9.65629	9.9588	9.38935
ENSRNOG00000005692	4.33223	4.3567	4.25528	4.3101	4.19898	4.25895	4.39311	4.40535	4.59505	4.14932	4.30766	4.29796	4.10723	4.48839	4.3738	4.40693	4.22752
ENSRNOG00000005695	13.1692	11.4253	12.0795	11.985	12.533	12.2276	11.3644	11.2304	12.1147	12.3049	12.7841	12.1461	12.5293	11.3394	12.0263	12.9911	11.6888
ENSRNOG00000005697	13.9918	13.5747	13.8385	13.8383	13.0892	13.3403	13.5356	13.5031	13.6733	13.6091	13.5723	13.6356	13.5763	13.6877	13.7839	13.1739	13.7861
ENSRNOG00000005698	13.2457	13.3249	13.3791	13.1675	13.1843	13.257	13.2575	13.2948	13.1673	13.188	13.44	13.2774	13.1327	13.5043	13.3011	13.2199	13.1709
ENSRNOG00000005700	14.9593	14.836	14.9885	14.9144	15.0031	14.948	14.9071	14.6763	14.78	14.7451	14.8875	14.905	14.7039	14.7265	15.0651	15.0781	14.8276
ENSRNOG00000005708	11.4528	11.7045	11.8203	11.8061	11.7543	11.7431	11.8518	12.1398	11.7964	12.0633	11.8876	11.7387	11.7902	11.8768	11.6999	11.9481	11.7362
ENSRNOG00000005713	10.7187	10.5651	10.857	10.8768	10.5748	10.6927	10.7425	11.1855	10.7559	10.7855	10.8155	10.7186	10.6637	10.7211	10.7975	10.697	10.9799
ENSRNOG00000005715	12.2427	12.0502	11.9828	12.2816	12.1259	12.034	11.8014	12.2737	12.1251	12.1225	12.2189	12.1397	12.311	12.148	12.0816	12.1495	11.8972
ENSRNOG00000005717	4.99509	4.89014	4.86014	4.76739	5.135	4.71674	4.61756	5.13566	4.52342	5.04564	5.05069	4.90252	4.81414	5.03366	4.91039	4.89075	4.78755
ENSRNOG00000005726	11.9218	12.4172	12.3729	12.296	12.4738	12.4421	12.5644	12.9781	12.5331	12.5267	12.3919	12.3732	12.317	12.5747	12.5435	12.5286	12.2273
ENSRNOG00000005727	7.25975	8.3457	7.33918	7.04063	8.23543	8.28283	8.56033	8.48412	8.3999	7.9646	8.21294	7.87153	7.68478	8.05963	8.59581	8.35	7.28286
ENSRNOG00000005731	8.71859	6.58397	7.96385	7.80076	7.39081	7.63248	7.04429	7.65027	7.79374	7.52016	8.25096	7.62353	7.18093	7.28131	8.05908	8.51744	7.27531
ENSRNOG00000005732	4.64369	5.14296	4.93108	4.56142	5.05879	4.61473	4.69254	5.1176	4.9925	4.93529	5.09025	4.82308	4.96859	4.58522	4.90121	4.70128	5.2499
ENSRNOG00000005742	4.90922	5.32705	5.30774	5.1053	5.1763	5.34737	5.18705	5.18931	4.96387	5.13587	5.77235	5.09048	4.79768	5.5246	4.31903	5.77099	5.61055
ENSRNOG00000005753	9.39603	9.13825	9.19886	9.06231	9.20655	9.43292	9.31315	9.33733	9.23646	9.20991	9.32476	9.2541	8.96483	9.55236	9.33483	9.4671	8.97596
ENSRNOG00000005763	13.5918	13.4313	13.4783	13.5288	13.4527	13.3692	13.2891	13.3997	13.449	13.5397	13.5974	13.4644	13.4697	13.3999	13.4579	13.602	13.3999
ENSRNOG00000005766	10.3778	10.5114	10.6128	10.3599	10.2467	10.8181	10.6574	11.0463	11.0073	10.9142	10.9775	10.5332	10.5201	10.5671	10.7849	11.0051	10.4545
ENSRNOG00000005770	14.2861	8.10142	11.9322	9.81838	10.9655	10.2235	8.80903	8.19523	10.214	10.1772	12.9722	10.7482	10.6165	8.25771	12.5326	11.7757	9.54438
ENSRNOG00000005793	4.71395	4.81745	4.6505	4.39179	4.80454	5.04844	5.05977	5.18926	4.51507	4.94866	5.05495	4.90781	5.17053	5.78188	4.79125	4.27829	4.20048
ENSRNOG00000005794	5.26655	5.11497	4.85416	4.94462	5.4123	4.99294	4.98805	5.30825	5.24706	5.52745	5.0318	5.10901	5.07465	5.27447	5.04643	5.44986	4.89525
ENSRNOG00000005796	13.5362	13.1112	13.3547	13.45	13.2896	13.3557	13.1515	13.0468	13.098	13.3552	13.2808	13.3322	13.3482	13.2068	13.3371	13.4021	13.1171
ENSRNOG00000005798	9.75011	7.30526	8.16971	7.95065	9.16005	8.49126	8.23031	8.367	8.93716	8.73833	9.33411	8.45182	8.04893	7.72212	9.46827	10.1698	7.43556
ENSRNOG00000005801	8.9731	8.72819	8.83523	8.4989	9.23511	9.23908	9.46235	9.19039	9.19479	8.79222	9.13736	8.97131	8.69612	9.35883	9.1772	9.27518	8.59014
ENSRNOG00000005804	12.8833	12.7819	12.9326	12.8279	13.0553	13.1061	13.0585	12.8961	12.942	12.9027	13.0319	12.925	13.042	12.8523	12.8432	13.0266	12.9583
ENSRNOG00000005806	6.90341	7.44198	6.5334	7.50943	6.70653	7.16901	8.33836	8.11204	7.78626	6.4918	7.46257	7.1273	6.74843	7.84674	7.28675	7.04617	7.53019
ENSRNOG00000005807	7.29556	6.90486	7.55351	7.37457	7.57037	7.52241	7.45548	7.06452	6.87612	7.21276	7.07838	7.2627	6.9201	6.99708	7.22587	7.65617	7.52182
ENSRNOG00000005809	10.8951	11.0307	11.0413	11.0769	11.1177	10.9727	11.0518	10.8969	10.8734	11.0881	10.9324	11.0264	11.0943	10.8828	11.1264	10.9867	10.9165
ENSRNOG00000005825	11.5799	11.0236	10.8755	11.6149	11.7638	11.3995	11.1473	10.9382	11.0944	10.7388	11.6113	11.3388	11.5231	10.8449	11.4239	11.7202	10.806
ENSRNOG00000005828	14.2926	14.3147	14.2071	14.304	14.2506	14.4573	14.1942	14.2457	14.2371	14.1907	14.0648	14.2879	14.2724	14.2184	14.2739	14.2436	14.2679
ENSRNOG00000005841	11.2424	10.8526	11.1671	11.0031	11.2155	11.3247	11.241	11.3831	11.2662	11.3062	11.325	11.1244	11.0416	11.1069	11.1654	11.5181	11.1734
ENSRNOG00000005849	12.6965	12.581	12.5648	12.7198	12.6054	12.6145	12.5758	12.6505	12.6927	12.5917	12.7453	12.6384	12.6291	12.5988	12.7357	12.7804	12.4542
ENSRNOG00000005853	8.63836	8.34908	9.03501	8.92317	8.15967	8.51398	9.15071	9.99463	9.67534	9.36557	8.97214	8.7233	8.94622	9.02336	8.92084	8.6419	9.21272
ENSRNOG00000005854	9.58693	9.71475	9.64869	9.10892	10.1903	10.1649	10.0519	9.94501	9.95501	10.038	10.2162	9.85601	10.3215	9.95785	10.0102	9.84605	9.22629
ENSRNOG00000005858	4.56736	5.1551	4.9975	5.04959	5.21167	5.0325	4.92592	5.16217	5.35551	5.45967	5.10509	5.11493	6.14114	4.78034	5.09915	4.71003	4.74713
ENSRNOG00000005861	13.1152	13.6469	13.3473	13.3396	13.7296	13.7644	13.6971	13.4716	13.4736	13.247	13.3824	13.5057	13.5787	13.4987	13.5306	13.4743	13.307
ENSRNOG00000005863	4.3876	4.57646	4.40715	4.57477	4.5889	4.43533	4.90658	4.30747	4.38291	4.59523	4.43699	4.51334	4.43058	3.85889	5.36043	4.54914	4.34873
ENSRNOG00000005871	5.91976	6.60258	6.10383	6.17084	6.3125	6.35221	6.57854	6.26881	6.29932	6.5001	6.58728	6.21283	6.2053	5.85535	6.39305	6.62376	6.52854
ENSRNOG00000005874	8.44996	9.49768	8.59728	9.74977	8.64922	8.64876	9.10245	9.1624	8.83291	8.5531	8.64066	8.8792	8.69254	8.79516	8.83244	8.77989	9.38117
ENSRNOG00000005877	13.1315	12.9918	13.0118	12.8999	13.3244	13.3904	13.3388	13.2467	13.1578	13.1725	13.2202	13.137	13.2062	13.1182	13.1587	13.2594	13.094
ENSRNOG00000005880	4.42945	4.46334	4.54397	4.38423	4.71843	4.41465	4.65675	4.78413	4.26696	4.64294	4.75435	4.50272	4.22854	4.97466	4.36718	4.73042	4.42451
ENSRNOG00000005888	7.66428	6.60414	7.40781	6.71779	7.30761	7.46482	7.08198	6.82297	7.35444	7.20792	7.79929	7.26342	7.19667	7.49108	7.51655	7.78736	6.13961
ENSRNOG00000005890	14.6236	14.4659	14.6195	14.4632	14.3041	14.4125	14.1493	14.3937	14.4228	14.3721	14.4078	14.4743	14.3434	14.4843	14.5521	14.375	14.3836
ENSRNOG00000005903	10.1034	9.23048	9.77822	9.81454	10.0236	9.5365	9.00358	8.85388	9.3362	9.51157	9.48293	9.66295	9.60045	9.15442	9.72495	10.1001	9.08778
ENSRNOG00000005904	9.80996	9.97119	9.97208	9.9672	9.88514	10.105	10.2176	10.3362	10.19	10.1487	10.1303	9.97145	9.82662	10.1739	10.032	10.2949	9.94882
ENSRNOG00000005905	13.2954	13.1142	13.1574	13.285	13.1408	13.0858	13.2275	13.1562	13.1571	13.2681	13.0735	13.2076	13.3774	13.2582	13.1543	12.9315	13.1876
ENSRNOG00000005907	10.5493	10.109	10.5432	10.1978	10.5548	10.6433	10.6638	10.4581	10.421	10.4337	10.4784	10.4685	10.3301	10.5946	10.6944	10.5654	10.1176
ENSRNOG00000005908	12.0459	12.0041	12.0118	11.9306	12.3305	12.4443	12.5543	12.4973	12.2366	12.3775	12.1524	12.1707	12.2386	12.3313	12.1996	12.2674	12.0995
ENSRNOG00000005911	5.9241	4.62288	5.43261	5.22556	5.66429	5.99812	5.93176	5.81521	5.92931	5.32004	5.9315	5.47418	4.9914	5.6779	5.73074	6.54895	5.05367
ENSRNOG00000005916	13.5655	13.2854	13.4762	13.5602	13.3311	13.3327	13.3333	13.2814	13.2302	13.3559	13.2924	13.4095	13.2887	13.3741	13.4714	13.36	13.3692
ENSRNOG00000005917	9.8998	9.10883	9.32318	9.24087	9.27674	9.38732	8.78206	9.14062	9.32407	9.44838	9.60651	9.34424	9.18801	8.9808	9.6926	9.81822	8.94227
ENSRNOG00000005921	5.55584	6.08507	5.55598	5.81223	5.29865	5.28072	5.20499	5.12372	5.75938	5.77489	5.90757	5.58446	6.2735	5.17527	5.22286	5.25011	5.97255
ENSRNOG00000005924	13.8629	13.609	13.563	13.6758	13.7515	13.7179	13.4064	13.4916	13.4311	13.6682	13.529	13.6802	13.7564	13.5869	13.5983	13.6065	13.5426
ENSRNOG00000005929	8.79976	8.52878	9.02124	8.25012	8.94679	9.0794	9.28254	9.02712	9.11383	8.62614	9.19287	8.80056	8.36961	9.2185	8.99081	9.21233	8.63653
ENSRNOG00000005931	12.7916	12.9958	12.9267	12.8249	13.0962	13.0479	12.7462	12.5429	12.6006	12.7062	12.6762	12.9387	13.1076	12.758	12.8995	12.6378	12.7424
ENSRNOG00000005933	9.19696	8.39251	8.41109	8.1813	8.92073	9.07602	8.94463	8.5123	8.95106	9.26176	8.92073	8.75069	8.37419	8.75357	9.44982	9.73005	7.65042
ENSRNOG00000005935	7.58952	6.47921	7.46214	6.87534	7.86571	7.3366	7.60728	7.73879	7.67843	7.52846	8.06971	7.31846	7.38567	7.40689	7.46507	8.00349	7.02243
ENSRNOG00000005936	8.25876	8.6508	8.07392	7.83588	8.18359	8.39957	8.22359	8.65189	8.61283	8.38109	8.38551	8.28161	8.15922	8.44496	8.52781	8.28892	8.21102
ENSRNOG00000005947	7.82675	7.12483	9.25245	6.86116	8.81915	8.81084	7.9058	7.81123	7.79852	8.09307	7.69359	8.17052	8.55631	7.91503	8.36814	7.58928	7.67251
ENSRNOG00000005950	5.1078	5.68662	5.2199	5.13446	5.01581	5.35427	5.3766	5.00291	5.19805	5.14324	5.21844	5.28173	5.348	5.08821	5.58051	4.84572	5.28983
ENSRNOG00000005954	5.11814	4.48671	4.55468	4.63919	4.59228	4.46663	4.69538	4.29026	4.52618	4.36472	4.68119	4.65529	4.1998	5.10111	4.73907	4.76637	4.15297
ENSRNOG00000005957	10.1398	10.8452	10.4702	10.2817	10.8359	10.8113	11.1066	11.0547	10.7855	10.6642	10.7623	10.6474	10.4674	10.9667	11.008	10.8295	10.2198
ENSRNOG00000005963	14.1857	14.1209	14.1534	14.1058	14.2562	14.3314	14.1534	14.1247	14.1131	14.1279	14.1254	14.1676	14.1507	14.1543	14.0503	14.2571	14.2075
ENSRNOG00000005964	8.71807	10.5765	9.63197	8.89112	9.22221	10.1914	10.0064	9.10858	9.18669	9.95676	9.1806	9.53977	8.69165	9.63016	10.3049	9.88491	9.08035
ENSRNOG00000005970	10.0949	9.36986	9.77417	9.56095	9.98763	9.67734	9.73434	9.52096	9.5282	10.5357	9.63156	9.78697	10.2285	9.76279	9.62657	9.64141	9.57914
ENSRNOG00000005975	14.3069	14.338	14.338	14.2603	14.3073	14.2253	14.1818	14.2708	14.2235	14.3236	14.4359	14.2948	14.3289	14.2539	14.295	14.2803	14.3033
ENSRNOG00000005984	9.2099	9.00075	8.29215	9.32884	8.53531	8.20988	8.6502	9.03596	8.81953	9.54467	9.0675	8.84011	8.82461	9.40439	8.75517	9.1393	8.25848
ENSRNOG00000005985	13.1467	12.9065	13.0058	12.8306	13.1597	13.1784	13.3243	13.4089	13.2436	13.1169	13.1895	13.0706	13.0781	13.1616	13.1682	13.0645	13.1744
ENSRNOG00000005987	12.8559	12.7332	12.8473	12.6721	13.0817	13.0252	12.9785	12.6937	12.794	12.7948	12.8088	12.8802	12.9276	12.8559	12.9227	12.887	12.6491
ENSRNOG00000005990	10.4548	10.0917	10.314	10.4452	10.1286	10.1889	10.2328	10.0649	10.1051	10.0368	10.1878	10.2243	10.0407	10.1798	10.1754	10.2412	10.3978
ENSRNOG00000005997	4.80594	5.08346	5.09348	4.82943	4.80188	4.81194	4.95227	4.70426	4.51191	5.22699	4.6059	4.95521	4.97274	5.17093	5.02711	4.42641	4.74692
ENSRNOG00000005998	11.0585	10.6227	10.9999	11.2164	10.8762	10.606	10.7264	10.7939	10.8733	10.911	11.0046	10.8342	10.9644	10.5865	10.5775	10.9812	11.2664
ENSRNOG00000006000	10.5428	10.5934	10.4926	10.596	10.6483	10.6848	10.7106	10.7903	10.6367	10.8006	10.7231	10.6568	10.7755	10.8723	10.7055	10.689	10.2394
ENSRNOG00000006010	12.4464	11.9357	12.1925	11.9561	12.0015	11.5284	10.3751	11.1794	11.7151	12.1397	13.4541	11.9687	13.0455	11.1545	11.4575	12.1672	11.7261
ENSRNOG00000006019	11.0001	10.6157	11.0172	10.4166	10.9766	11.0405	10.2752	10.3889	10.5973	10.1586	10.8474	10.8106	10.678	10.8377	10.7127	10.7496	10.4419
ENSRNOG00000006024	5.12868	6.21464	5.53295	5.57039	5.75268	5.71001	5.78173	5.68585	5.57565	5.87605	6.1334	5.70618	5.9844	5.75898	5.70287	5.73143	5.43083
ENSRNOG00000006030	13.4844	13.263	13.5251	13.3033	13.6491	13.5606	13.5232	13.3468	13.443	13.5625	13.4356	13.4809	13.8285	13.3434	13.3703	13.2793	13.5057
ENSRNOG00000006033	8.43832	7.46579	7.82484	8.09388	8.25683	8.0189	8.04636	8.32843	8.12031	8.04763	8.74876	8.09576	8.26323	8.03439	8.46565	8.50536	7.34484
ENSRNOG00000006035	4.71568	4.55263	4.47885	3.94569	4.34155	4.74596	5.02763	5.16821	5.61094	5.47045	4.60265	4.56606	4.65391	5.20525	4.45504	4.82565	4.66387
ENSRNOG00000006052	13.4772	13.562	13.6975	13.1456	13.854	14.0124	13.8501	13.8043	13.9407	13.3228	13.7031	13.6759	13.6369	13.8531	13.8442	13.6642	13.355
ENSRNOG00000006067	12.4257	11.766	12.3129	12.0609	12.2392	12.2652	11.9818	12.0303	12.1283	12.1102	12.206	12.1458	12.0442	11.9952	12.2033	12.4133	12.0421
ENSRNOG00000006069	11.7317	11.2202	11.4337	11.4734	11.3607	11.4511	11.2657	11.4493	11.3391	11.3691	11.4053	11.446	11.3615	11.3753	11.6068	11.4158	11.308
ENSRNOG00000006075	13.5918	13.58	13.6415	13.5122	13.4836	13.4971	13.4845	13.5335	13.6313	13.5897	13.6126	13.5571	13.62	13.5493	13.5383	13.4663	13.6236
ENSRNOG00000006082	10.735	10.369	10.7465	10.6132	10.7679	10.6547	10.44	10.2045	10.4132	10.6857	10.5643	10.6341	10.6173	10.6116	10.5915	10.8577	10.1798
ENSRNOG00000006090	7.75076	7.22751	7.41385	7.6193	7.66828	7.77959	7.97998	7.40109	7.61009	7.06589	7.21063	7.55959	7.38876	7.4517	7.73654	7.49807	7.55147
ENSRNOG00000006094	5.97708	5.79076	6.05101	6.10974	6.01135	5.95513	6.2227	6.0178	6.30351	6.20675	6.01349	6.00221	6.18347	6.15542	5.7859	6.15366	5.9866
ENSRNOG00000006104	5.55552	5.3833	5.58131	5.55384	5.62814	5.45043	5.56219	5.2733	5.11491	5.27269	5.64945	5.55756	6.01258	5.26944	5.58349	4.86987	5.60919
ENSRNOG00000006116	9.013	9.00112	8.62201	9.24161	8.97052	8.96841	9.63238	10.2404	9.90396	9.75839	9.03161	9.0785	9.26827	9.19657	9.42499	9.28428	9.22634
ENSRNOG00000006118	10.4108	11.1458	10.9532	11.2222	11.2694	11.2653	11.5081	11.3585	11.1549	10.9221	11.0602	11.046	10.8209	11.0628	11.2636	11.5833	10.8051
ENSRNOG00000006120	5.90803	4.84625	6.09744	5.85428	5.35641	5.03554	5.20164	5.68826	5.65618	5.09111	5.45702	5.44387	4.88904	5.48482	5.52306	5.66218	5.78408
ENSRNOG00000006122	7.50124	7.30598	6.63181	6.91814	6.39653	6.95277	6.27003	6.02341	6.78628	6.2409	6.48986	6.83403	6.16757	6.75455	6.87767	6.94374	6.76367
ENSRNOG00000006126	12.2896	11.944	12.2361	12.2071	12.2851	12.2447	12.199	11.9977	12.0023	12.0215	12.0501	12.1716	12.0692	12.1516	12.1167	12.2193	12.137
ENSRNOG00000006130	12.6318	12.7013	12.5471	12.7951	12.1793	12.4386	12.6187	12.9215	12.8959	12.9064	12.8089	12.5745	12.6128	12.6622	12.6019	12.6634	12.7823
ENSRNOG00000006132	5.87884	6.84846	6.28116	6.14912	6.11504	6.30923	5.86408	5.8338	6.00339	6.46338	6.46538	6.19363	6.81511	5.98761	5.35807	5.88313	6.957
ENSRNOG00000006136	13.0196	12.9672	13.1761	12.9232	13.1162	13.1258	13.0665	13.1511	13.0713	13.1455	13.2197	13.0598	12.9577	13.0888	13.1633	13.275	12.9439
ENSRNOG00000006139	13.1509	13.0529	13.0971	12.9074	13.355	13.4929	13.4097	13.3109	13.2806	13.3085	13.3002	13.1747	13.1177	13.2435	13.155	13.5303	13.1248
ENSRNOG00000006143	11.6911	11.3678	11.5201	11.5475	11.4483	11.5076	11.4727	11.3885	11.4124	11.5102	11.3711	11.4861	11.2826	11.4356	11.574	11.614	11.4802
ENSRNOG00000006144	10.9976	10.4912	10.6622	11.6127	10.2091	10.4526	10.7008	10.8701	10.8084	10.4406	10.5828	10.6715	10.4201	10.4487	10.749	10.8234	11.093
ENSRNOG00000006146	7.22072	5.76068	5.31542	6.92114	5.80643	6.22745	6.44059	6.62875	6.66475	4.71639	6.30342	6.09104	5.26542	5.91769	6.38437	6.60828	6.68116
ENSRNOG00000006151	5.65522	5.57965	5.67708	5.52839	5.71631	5.25082	5.53986	5.39187	5.12938	5.72099	5.40401	5.47557	5.20564	5.19306	5.474	5.49707	6.15301
ENSRNOG00000006174	11.3388	10.5118	11.1322	11.0789	10.8962	10.8343	10.8335	10.8234	10.607	11.1083	10.9001	11.0162	11.2055	11.0674	11.0808	10.5999	10.6819
ENSRNOG00000006178	13.845	13.7736	13.8884	13.7248	14.2444	14.177	14.3224	14.2754	14.0952	14.0242	14.2515	13.9785	14.0879	14.0139	14.0513	14.1719	13.9108
ENSRNOG00000006197	12.1937	12.0075	12.1392	12.2276	12.1184	12.3278	12.1831	12.0466	12.1369	12.0024	12.1716	12.1373	11.9465	12.1439	12.1314	12.4712	12.0115
ENSRNOG00000006199	10.2935	9.29485	9.81684	9.67534	9.72411	9.76207	9.67109	9.476	9.67351	9.97796	9.99515	9.70611	9.37267	9.47494	9.94065	10.3737	9.60583
ENSRNOG00000006200	11.0737	11.6121	11.2679	10.0266	11.7887	11.7158	11.9371	11.6977	11.5597	11.955	11.5539	11.3744	11.5485	11.7322	11.6041	11.1257	11.2894
ENSRNOG00000006204	12.3869	12.8102	12.8346	12.2745	12.9606	13.0949	13.1147	13.1154	13.2861	13.2973	13.1514	12.7435	12.8415	12.7339	12.7546	13.39	12.8566
ENSRNOG00000006206	13.4527	13.3298	13.525	13.3512	13.4219	13.4814	13.46	13.3152	13.2497	13.4726	13.4068	13.4203	13.4019	13.4569	13.3621	13.3632	13.4545
ENSRNOG00000006221	12.9482	12.6481	12.8738	12.6899	12.9884	13.0745	13.1148	12.9469	12.9442	12.93	12.9518	12.8755	12.8986	12.9225	12.8357	12.9861	12.9266
ENSRNOG00000006226	14.2931	14.1604	14.2562	14.0621	14.1706	14.3617	14.1026	14.1298	14.1755	14.0164	14.1843	14.1946	14.0019	14.1431	14.3026	14.2815	14.1528
ENSRNOG00000006228	11.9402	11.5201	11.7007	11.6768	11.7557	11.6377	11.4801	11.5793	11.5942	11.7083	11.717	11.6754	11.4384	11.5811	11.828	11.9974	11.4843
ENSRNOG00000006231	11.8308	12.1125	12.2143	12.7564	12.1122	12.1032	12.5479	12.5882	12.2888	12.1125	12.2089	12.2138	12.3105	12.2397	12.2446	12.2067	12.2771
ENSRNOG00000006235	13.3308	13.7074	13.6235	13.2347	13.8413	13.8488	13.9589	14.1861	14.0193	13.9281	14.1877	13.6583	13.7548	13.8014	13.7825	14.0219	13.5813
ENSRNOG00000006236	6.30656	6.0256	6.19667	6.65838	5.96595	6.33262	6.70693	6.43622	6.73731	5.94837	6.86863	6.40961	6.79813	6.57528	6.82733	6.20368	5.51464
ENSRNOG00000006241	11.1274	10.673	11.1749	11.1912	10.9062	11.2569	11.278	11.1321	10.9584	11.2045	11.2497	11.0652	11.1442	11.119	10.9943	11.188	11.0546
ENSRNOG00000006244	10.6685	9.82838	10.3606	10.4395	10.1407	10.2426	10.1086	9.94835	10.0491	10.0099	10.2596	10.2175	9.7713	10.2811	10.2248	10.6348	10.0409
ENSRNOG00000006268	5.21704	5.13264	5.34423	5.11997	4.97471	5.21046	5.06298	5.33736	5.25596	5.18192	4.84952	5.20751	4.87462	5.38025	5.61371	5.12621	4.80444
ENSRNOG00000006280	6.98306	7.23767	7.17867	6.75494	7.69528	7.63232	7.75996	7.30901	7.17954	7.00633	6.65942	7.23926	7.11677	7.41521	7.13943	6.94829	7.48235
ENSRNOG00000006302	12.6099	12.5581	12.5857	12.5575	12.6507	12.701	12.6152	12.7895	12.7202	12.572	12.7045	12.6364	12.7508	12.6729	12.6413	12.584	12.5586
ENSRNOG00000006305	13.8388	13.4702	13.5554	13.4378	13.4831	13.3801	13.3309	13.5337	13.3651	13.6887	13.4409	13.5175	13.5954	13.5119	13.3845	13.1974	13.8312
ENSRNOG00000006306	6.88508	6.54156	6.60797	6.94125	6.88944	6.98148	6.65885	6.06938	6.92834	6.55468	6.60236	6.77704	7.57665	5.38799	7.18195	6.56756	6.81622
ENSRNOG00000006311	5.39116	5.42722	5.01837	5.36281	5.0702	5.05791	4.83385	5.20464	5.05241	5.29103	5.37242	5.24289	5.63184	5.25432	4.97213	4.83929	5.28096
ENSRNOG00000006320	8.32732	7.67269	7.87518	7.68621	8.07866	7.85724	7.67313	8.12116	7.96368	7.69169	8.94683	7.94879	8.33235	7.99619	7.71326	7.91396	7.97103
ENSRNOG00000006324	10.4522	10.5163	11.1407	10.502	11.0608	11.0965	10.7577	10.799	10.684	10.689	10.5875	10.7636	10.6426	10.7357	10.7255	10.9683	10.7003
ENSRNOG00000006328	12.4923	12.2333	12.3565	12.5258	12.1577	12.2295	12.0572	12.1489	12.1879	12.2243	12.2498	12.3355	12.3671	12.3691	12.2884	12.1968	12.1251
ENSRNOG00000006330	7.24524	8.12267	7.34832	7.7117	6.55939	6.59872	6.37265	7.55616	7.59477	7.53279	7.19733	7.24692	7.29747	6.92455	7.41419	6.8601	7.78773
ENSRNOG00000006331	13.9966	13.6723	13.8253	13.7989	13.9443	13.8931	13.7474	13.7093	13.5477	13.8417	13.7871	13.8534	13.8806	13.7964	13.873	13.768	13.6995
ENSRNOG00000006340	11.8572	11.7199	11.8032	11.6405	11.9449	11.8952	11.7583	11.7489	11.8778	11.709	11.5685	11.8094	11.6818	11.7472	11.9949	11.8685	11.6026
ENSRNOG00000006353	8.60678	7.01902	7.84144	8.49909	8.13263	8.24752	7.29896	6.87245	7.54061	7.39081	8.0326	7.89728	7.50704	6.76854	8.45346	9.30237	6.89972
ENSRNOG00000006355	13.0992	13.0925	13.1224	13.2027	13.2453	13.2165	13.126	13.1031	13.0603	13.1944	13.287	13.157	13.2677	13.0608	13.1056	13.3016	13.0583
ENSRNOG00000006359	10.7136	10.5258	10.64	10.667	10.5938	10.5641	10.6625	10.6032	10.9051	10.3203	10.6259	10.5907	10.3369	10.5686	10.7066	10.8469	10.6239
ENSRNOG00000006360	5.21973	5.15971	5.62938	5.42088	5.16688	5.33434	5.50948	5.29215	4.95187	5.47278	5.46959	5.30559	4.72305	5.8264	5.26991	5.76481	5.04991
ENSRNOG00000006364	13.0078	12.8944	13.0399	13.148	12.6471	12.6991	12.61	12.884	12.8975	12.7033	12.9807	12.8806	12.7437	12.8877	12.8582	12.8796	12.964
ENSRNOG00000006368	12.8671	12.7568	12.8785	12.724	12.6601	12.681	12.7954	12.9065	12.9261	13.0304	12.8489	12.7713	12.6526	12.9909	12.7307	12.8964	12.822
ENSRNOG00000006370	7.9588	7.49996	7.83589	7.57427	7.69767	8.25451	8.44179	7.97609	8.20601	7.88469	8.11451	7.85642	7.42955	8.06278	8.39437	8.467	7.33782
ENSRNOG00000006375	14.6667	14.6958	14.5943	14.6245	14.5124	14.5915	14.6605	14.624	14.5457	14.5328	14.5735	14.5838	14.4004	14.556	14.6131	14.5649	14.8646
ENSRNOG00000006380	13.7788	13.7969	13.7788	13.8691	13.8877	13.8583	13.7359	13.6005	13.4759	13.7235	13.6114	13.807	13.763	13.725	13.8058	13.7391	13.6982
ENSRNOG00000006388	11.5981	9.77817	10.6117	10.084	9.93264	10.201	9.71391	9.49394	10.0418	10.1338	9.84804	10.3183	9.83932	10.3792	10.4407	9.95442	10.1522
ENSRNOG00000006392	11.9694	11.6693	11.8883	11.8237	11.8018	11.8291	11.702	11.5825	11.7229	11.8457	11.7581	11.835	11.9209	11.8818	11.7305	11.7573	11.6476
ENSRNOG00000006393	10.8887	10.6753	10.9341	10.8278	10.8771	10.8352	10.9032	10.7833	10.8371	10.6388	10.8774	10.8262	10.6867	10.8649	10.846	10.9059	10.8233
ENSRNOG00000006394	12.2713	12.1095	12.2884	12.1118	12.4095	12.2735	12.3085	12.1655	12.3065	11.9355	12.2648	12.2336	12.1036	12.2625	12.2721	12.3135	12.1663
ENSRNOG00000006397	8.53475	9.6172	8.86151	7.75251	9.41267	8.95162	10.1528	10.0717	9.48281	9.86022	9.80341	9.04528	8.5936	9.82262	9.86106	9.28726	8.86313
ENSRNOG00000006399	12.5493	12.3602	12.4379	12.3594	12.3245	12.3533	12.2689	12.1891	12.3585	12.4305	12.265	12.3957	12.3632	12.3084	12.5054	12.3277	12.2914
ENSRNOG00000006400	13.4104	13.2741	13.4265	13.1067	13.6146	13.5665	13.452	13.4872	13.3472	13.5125	13.3407	13.3898	13.3969	13.3479	13.3646	13.4318	13.5078
ENSRNOG00000006408	6.50665	7.31082	6.60443	6.85522	6.11238	6.35227	6.44007	6.44975	6.78815	7.09415	7.10425	6.59328	6.90583	6.40871	6.28319	6.59064	7.21486
ENSRNOG00000006410	10.5593	11.4487	11.2139	11.6706	10.9694	11.0041	11.5411	11.586	11.3836	11.308	10.8195	11.1739	11.1283	11.2568	11.3142	11.0948	11.312
ENSRNOG00000006412	12.7553	12.4744	12.6987	12.4913	12.8769	12.7872	12.7456	12.8396	12.6827	12.9211	12.7036	12.6869	12.6966	12.6888	12.7126	12.8504	12.6543
ENSRNOG00000006415	4.62442	5.24716	4.83924	4.7851	4.82049	5.09828	4.99947	5.00414	4.84966	5.22148	5.05458	4.85281	4.90201	4.6818	4.67676	5.05109	5.41763
ENSRNOG00000006426	14.6263	14.8337	14.6731	14.7624	14.7624	14.7817	14.9287	15.0734	14.9533	14.8475	14.9292	14.7693	14.8632	14.8698	14.7509	14.8122	14.834
ENSRNOG00000006428	4.58542	5.459	5.24865	5.20629	5.15401	4.59469	5.08926	4.85388	4.60996	5.39718	5.77439	5.11703	5.95261	4.92124	4.93133	4.44164	5.2125
ENSRNOG00000006432	11.3083	11.2331	11.2795	11.2631	11.2412	11.2866	11.1801	11.1496	11.0899	10.9305	11.0366	11.2303	11.0692	11.1143	11.2777	11.0714	11.4049
ENSRNOG00000006433	4.5134	4.98528	4.80374	4.52882	4.58946	4.91386	4.77109	4.62745	4.62133	4.71926	5.11601	4.708	4.73951	5.0125	4.28546	4.75655	4.90666
ENSRNOG00000006435	9.99932	9.91841	9.96142	10.1895	9.94193	9.89464	10.1301	10.0198	9.92899	9.93492	10.0246	9.99383	9.87093	10.0859	10.0824	10.0637	9.87083
ENSRNOG00000006439	4.35642	4.50574	4.61088	4.57401	4.36491	4.67107	4.8853	4.18981	4.23137	4.35623	4.36993	4.51985	4.39854	4.94821	4.2489	4.33066	4.43187
ENSRNOG00000006441	8.55706	8.60656	8.78814	8.83724	8.33735	8.36653	8.58014	8.71503	8.52517	8.62522	8.58208	8.64165	8.64099	8.80287	8.83808	8.28105	8.4302
ENSRNOG00000006445	5.15747	6.67165	5.60664	5.4776	5.35925	5.47475	4.90831	5.1887	5.18524	5.91407	6.04785	5.52686	5.59679	5.35148	5.04607	5.67609	6.04229
ENSRNOG00000006450	9.30359	8.97495	8.93605	9.24544	8.77104	9.23862	8.76944	8.79514	9.2907	9.13034	9.42409	9.07797	9.1158	8.81457	9.30167	9.66386	8.50265
ENSRNOG00000006460	8.81198	8.63613	8.97528	8.80084	8.88122	9.38477	9.25792	8.95449	8.89302	8.80543	9.10746	8.93882	8.96455	9.06846	8.92613	9.0803	8.72727
ENSRNOG00000006462	12.4445	12.3242	12.4807	12.5462	12.4022	12.4526	12.7127	12.6261	12.4879	12.3779	12.4392	12.4469	12.4113	12.4717	12.4882	12.3557	12.6589
ENSRNOG00000006467	13.1271	12.8008	13.0234	12.9528	13.075	13.0831	13.0191	12.8477	12.9597	12.974	12.8308	13.0116	12.9124	13.0127	13.1173	13.0902	12.7518
ENSRNOG00000006469	10.9028	10.5369	10.5091	10.5408	10.5808	10.6673	10.3834	10.2797	10.7025	10.5694	10.6467	10.6051	10.6803	10.5176	10.5102	10.7415	10.4411
ENSRNOG00000006470	11.2455	11.5881	11.4374	11.9879	10.7316	11.3596	11.4624	11.4271	11.1875	10.6427	11.0201	11.3174	10.9032	11.2886	11.3149	10.9172	12.0025
ENSRNOG00000006471	12.7453	12.6108	12.5402	12.7718	12.4408	12.409	12.624	12.4928	12.3894	12.3325	12.6553	12.5799	12.3972	12.6644	12.6398	12.4287	12.6226
ENSRNOG00000006472	13.3736	13.2698	13.3432	13.0935	13.5982	13.4968	13.4286	13.258	13.4648	13.2436	13.5677	13.3722	13.362	13.3754	13.4377	13.5964	13.107
ENSRNOG00000006486	4.90345	5.37611	5.11918	5.21383	5.41261	5.38949	5.10419	5.32809	5.25861	5.1831	4.94298	5.25205	5.59739	5.01812	5.23829	5.0114	5.17869
ENSRNOG00000006499	13.0507	12.8272	12.9559	12.9554	12.733	12.6917	12.831	12.8552	12.9169	12.6895	12.8312	12.8645	12.6178	12.9144	13.0345	12.8106	12.8765
ENSRNOG00000006500	13.8924	13.9511	13.9063	13.881	14.0825	14.0197	13.9926	13.8043	13.8604	13.7209	13.7973	13.9535	13.8611	13.9832	14.004	13.9187	13.7685
ENSRNOG00000006508	10.7922	10.1621	10.7436	10.3171	10.7838	10.7486	10.5656	10.5351	10.6518	10.472	10.7425	10.5788	10.4196	10.499	10.7433	10.9219	10.3692
ENSRNOG00000006513	9.70228	9.727	9.93851	9.5106	9.85687	9.97132	10.0988	9.70972	9.86871	9.57271	9.89126	9.76287	9.44223	9.90651	9.8105	9.99526	9.84235
ENSRNOG00000006514	12.1027	12.1553	12.2615	12.1795	12.3807	12.3446	12.3803	12.2244	12.252	12.0636	12.1885	12.2473	12.2642	12.2598	12.2771	12.2303	12.1301
ENSRNOG00000006527	13.4023	13.8771	13.3856	13.9098	12.8489	13.2195	13.7263	13.8663	13.824	13.7505	13.8373	13.5258	13.7392	13.731	13.6188	13.202	13.6835
ENSRNOG00000006532	14.6709	14.4523	14.6814	14.6012	14.4605	14.472	14.4055	14.3858	14.4556	14.5661	14.5986	14.5219	14.5351	14.5028	14.3211	14.5278	14.7264
ENSRNOG00000006534	13.1287	12.9954	13.1103	13.1156	13.1547	13.2168	13.3344	13.1991	13.0564	13.1186	13	13.1042	13.0387	13.0341	13.1435	13.0932	13.3251
ENSRNOG00000006539	12.8987	12.7679	12.9727	12.8521	12.8363	12.8971	12.882	12.9664	12.9836	12.9378	12.9786	12.8704	12.7982	12.9263	12.8847	13.0462	12.8561
ENSRNOG00000006541	11.8789	11.798	11.9415	11.8817	12.066	11.9164	12.0152	11.8112	11.7664	11.7554	11.825	11.9056	11.7986	11.8849	11.9847	11.9122	11.8252
ENSRNOG00000006542	14.9296	14.9767	15.0565	14.9769	15.0881	15.1692	15.2276	15.2366	15.1484	15.0919	15.1535	15.0694	14.9712	15.1942	15.2624	15.2627	14.7733
ENSRNOG00000006543	4.6693	4.73618	4.58569	4.50059	4.4436	4.85623	4.67057	4.46535	4.75496	4.46905	4.47283	4.61792	4.35638	4.95671	4.45664	4.73831	4.51245
ENSRNOG00000006545	13.9683	14.0296	13.9676	14.194	14.0383	14.0658	14.0951	14.0174	13.8225	13.9875	13.7228	14.0355	14.0756	13.9585	14.0219	13.8059	14.1228
ENSRNOG00000006548	8.4547	7.94013	8.21081	8.71047	8.09378	7.8784	8.93568	8.60851	8.8076	8.76293	9.38695	8.31684	8.91948	8.26944	8.37439	8.5314	8.41138
ENSRNOG00000006554	12.6334	12.5928	12.5509	12.5833	12.9487	12.8698	12.844	12.6954	12.6544	12.6502	12.6846	12.7096	12.8277	12.6997	12.6804	12.7641	12.5368
ENSRNOG00000006577	4.35001	4.53155	4.74543	4.57251	4.55093	4.7721	4.59787	4.2724	4.38065	4.65351	4.13956	4.5541	4.52702	4.08206	4.85528	4.53727	4.55745
ENSRNOG00000006578	5.52142	6.54719	5.72712	6.02782	6.06795	5.80763	6.05293	5.93454	6.44075	6.25674	6.40084	5.97692	6.63956	5.96101	5.49257	6.03896	6.16802
ENSRNOG00000006579	6.01393	6.85171	6.54381	6.5812	6.39162	5.79825	5.97788	5.92792	5.94419	6.60004	5.9573	6.37979	6.73391	6.46983	6.03388	5.65547	6.36993
ENSRNOG00000006582	11.0544	10.9229	11.1089	11.1719	11.0641	10.9246	10.9523	11.2589	11.0525	11.1453	11.0657	11.0409	10.9848	11.0614	11.0752	11.1671	11.0248
ENSRNOG00000006583	7.60701	7.07344	6.89705	7.26075	7.2983	7.2596	7.53905	7.48371	7.53505	7.16434	7.95564	7.27382	6.97563	7.68377	7.4088	7.978	6.74766
ENSRNOG00000006584	4.38315	4.5555	4.39669	4.3522	4.30169	4.61826	4.27999	4.43314	4.24635	4.58929	4.39284	4.42788	4.39683	4.43919	4.4074	4.45531	4.37763
ENSRNOG00000006588	7.60639	8.0215	8.1105	6.88217	8.44015	8.5553	8.21006	8.08524	8.17977	8.12751	8.52012	7.99633	7.77504	8.38643	8.1895	8.63303	7.30928
ENSRNOG00000006589	13.2452	13.3135	13.2044	13.1585	13.2145	13.3575	13.3333	13.353	13.4492	13.0041	13.5184	13.2512	13.1108	13.3295	13.3269	13.4313	13.2129
ENSRNOG00000006593	13.0555	12.8568	12.9553	12.9657	12.886	12.9864	12.862	12.5888	12.8009	12.5262	12.7535	12.9122	12.7165	12.9923	12.7952	12.8723	12.8658
ENSRNOG00000006595	9.52145	10.5698	10.1359	10.7998	9.33168	9.59874	10.7221	10.6607	10.1753	9.50754	10.3882	10.0417	9.57828	10.3966	10.4429	9.67517	10.4965
ENSRNOG00000006604	15.3959	15.2393	15.3225	15.2454	15.3525	15.3597	15.3349	15.4032	15.2454	15.1718	15.304	15.2791	15.0345	15.3508	15.2113	15.4062	15.5145
ENSRNOG00000006611	10.4894	10.8491	10.6753	10.4941	10.5437	10.717	10.5881	10.299	10.3618	10.5359	10.3959	10.5844	10.5431	10.5527	10.3957	10.3594	10.8795
ENSRNOG00000006615	8.56392	8.76274	8.23861	8.09371	8.42999	8.49234	7.96929	8.37413	8.19009	8.20208	8.30767	8.42272	8.32871	8.34459	8.54984	8.10642	8.3739
ENSRNOG00000006622	11.5011	11.0122	11.4335	11.2145	11.2738	11.5121	11.0221	10.8108	11.1157	10.9697	11.0412	11.2751	11.3383	11.0685	11.1221	11.1361	11.2627
ENSRNOG00000006623	11.8052	11.8593	11.8134	12.0312	12.0402	12.0236	11.6495	11.5599	11.6239	11.0891	11.8317	11.8959	11.6103	11.9147	11.9648	12.0569	11.3217
ENSRNOG00000006637	4.63973	5.2137	4.97528	4.60256	4.67278	4.71979	4.57376	4.64596	4.29806	4.94237	4.98679	4.66776	4.5916	4.1503	4.44407	4.58954	5.93345
ENSRNOG00000006639	8.00976	6.66865	7.79466	7.44308	7.73634	7.21973	6.78235	7.37325	7.02116	7.26486	7.67548	7.57601	8.2216	7.5544	7.53591	6.77373	6.85569
ENSRNOG00000006641	5.90604	6.95281	6.22881	6.04322	6.56882	6.48526	6.73164	6.26886	6.35644	6.79743	6.35526	6.23844	5.80449	6.2442	5.91231	7.01948	7.04042
ENSRNOG00000006642	12.7629	12.2621	12.5876	12.3528	13.0375	12.9216	12.9871	13.0234	12.7224	13.0987	12.936	12.6953	12.924	12.6697	12.7394	12.9463	12.6147
ENSRNOG00000006649	9.70087	10.5761	9.83238	11.1615	10.1103	9.7663	11.4761	11.5549	10.8183	10.7727	10.7835	10.3205	10.5926	10.5942	10.5504	10.327	10.7493
ENSRNOG00000006652	14.0296	13.911	14.1509	14.0525	14.1645	14.2391	14.2348	14.1618	14.0564	14.0732	14.0918	14.1011	14.1486	14.0668	14.1472	14.103	14.0612
ENSRNOG00000006653	7.95513	10.2884	7.75518	10.0556	8.97834	8.33709	10.9394	10.8759	10.3571	8.30019	10.5971	9.02294	9.2152	8.97719	9.6443	9.24365	10.1092
ENSRNOG00000006654	4.53197	4.39956	4.66429	4.27837	4.19436	4.32149	4.73797	4.41385	4.14136	4.93728	4.36723	4.46385	4.06781	4.71378	5.00303	4.36274	4.12604
ENSRNOG00000006655	13.0233	12.862	12.8559	12.9467	12.8718	12.9572	12.867	12.8394	12.8962	12.6997	12.8641	12.9109	12.8411	12.9233	12.9166	12.8856	12.8532
ENSRNOG00000006663	11.9626	11.5242	11.9165	11.808	11.6376	11.71	11.4351	11.3377	11.6334	11.6449	11.8062	11.6941	11.5491	11.5996	11.5393	12.0021	11.6928
ENSRNOG00000006669	4.20433	4.48532	4.57434	4.43788	4.25484	4.2606	4.45579	4.40643	4.07556	4.1905	4.43886	4.36692	4.10266	4.72376	4.25851	4.18857	4.46043
ENSRNOG00000006674	9.71407	8.89702	9.24447	8.4213	9.84755	9.62725	9.19022	8.85198	9.3851	8.85775	8.96591	9.24497	8.88951	9.18832	9.37521	9.51229	8.9827
ENSRNOG00000006675	5.23881	5.31981	4.97142	5.53889	4.60156	4.5493	4.47845	5.41405	5.56503	4.78218	5.15451	5.08719	4.6722	5.77036	5.1224	5.30854	4.42443
ENSRNOG00000006681	11.8075	11.7069	11.9193	11.7372	11.8706	12.0347	11.8506	11.7333	11.8156	11.6792	11.9331	11.846	11.9053	11.8338	11.7991	11.8683	11.7363
ENSRNOG00000006695	10.9864	11.0566	11.1446	10.9986	10.9638	11.0923	11.0544	11.0482	11.0824	10.775	11.1201	11.0254	10.8136	10.9532	11.2196	11.0998	11.058
ENSRNOG00000006697	13.1603	13.0408	12.9422	12.9011	13.3234	13.334	13.3878	13.2551	13.2544	13.0176	13.2243	13.1139	13.0482	13.1949	13.0806	13.3158	13.1653
ENSRNOG00000006700	11.8629	11.6087	11.8231	11.9703	11.6049	11.5443	11.5408	11.6068	11.5584	11.5933	11.4634	11.7219	11.7609	11.5301	11.7919	11.3917	11.8294
ENSRNOG00000006705	10.0278	10.2048	10.2021	10.105	9.94864	10.1199	10.2035	10.4415	10.2106	10.0297	10.2059	10.097	9.50243	10.2876	10.475	10.4764	9.99647
ENSRNOG00000006706	5.42188	5.94733	5.52701	5.59655	5.56146	4.99422	5.49859	5.41549	5.28903	5.65435	5.87292	5.41171	5.03358	5.38329	5.24005	5.78811	6.11354
ENSRNOG00000006709	5.70646	5.61322	5.86636	5.88248	5.4278	5.53695	5.56375	5.69473	5.78379	5.84567	5.25619	5.64776	5.61641	5.34841	5.83173	5.50462	5.95845
ENSRNOG00000006715	6.5207	5.34179	5.85812	5.96889	5.90518	5.8212	5.64226	5.39329	5.5447	5.64021	7.0076	5.86791	6.30122	5.7743	5.31981	6.07614	5.90685
ENSRNOG00000006716	5.12157	6.06346	5.25778	5.47352	5.70457	5.27752	5.39436	5.08135	5.1748	5.62293	5.8017	5.47616	6.27149	5.27405	4.84152	4.98458	5.90348
ENSRNOG00000006720	12.8484	12.9593	13.0501	13.1165	12.8951	12.9782	13.043	13.2473	13.2106	13.0795	13.0502	12.9871	13.0138	13.0383	12.9844	13.1199	13.0272
ENSRNOG00000006731	8.77205	9.89613	9.31551	8.29971	9.54023	10.2802	10.1891	10.1664	10.2622	9.00031	9.66002	9.47293	9.00692	10.0755	10.0702	9.67211	9.01179
ENSRNOG00000006734	5.43204	5.42358	5.4615	5.71693	5.09066	5.49177	5.47868	5.30197	5.3749	5.33418	5.3953	5.38823	5.01635	5.31525	5.546	5.74208	5.41386
ENSRNOG00000006735	6.71089	7.13221	7.30676	7.75712	6.67972	6.28348	6.27148	5.77617	6.35403	6.0029	5.7739	6.82893	6.31935	6.64088	6.62998	6.44391	6.8827
ENSRNOG00000006736	7.15164	7.23823	7.0217	7.26123	7.01354	7.12762	7.62591	7.09959	7.3551	7.30317	7.12316	7.1692	7.11136	7.3566	7.24091	7.21178	7.10923
ENSRNOG00000006738	10.3686	9.36081	10.182	9.2238	10.0946	10.1631	9.0982	9.07295	9.13902	10.1689	9.59825	9.92759	10.2596	9.88009	9.81579	9.51102	9.07812
ENSRNOG00000006740	9.24274	9.20137	9.24812	8.94528	9.28676	9.18426	8.95834	8.65836	9.09849	8.63991	9.46764	9.15491	9.12131	9.0801	9.08428	9.19049	8.98928
ENSRNOG00000006746	5.24306	5.86278	5.0903	5.23059	5.44727	5.24738	5.29027	4.85268	5.45307	5.85763	5.63851	5.29627	5.19679	5.7446	4.60371	6.11075	5.20733
ENSRNOG00000006747	12.3434	12.383	12.4445	12.6007	12.3855	12.3013	12.4697	12.6159	12.4946	12.4296	12.5765	12.4111	12.4066	12.4807	12.3543	12.5282	12.4947
ENSRNOG00000006751	13.5855	13.5502	13.5645	13.5839	13.4567	13.4549	13.3681	13.4375	13.4982	13.2611	13.4269	13.5086	13.317	13.4952	13.5695	13.4931	13.5053
ENSRNOG00000006756	14.7175	14.6948	14.737	14.6735	14.7206	14.7495	14.7157	14.76	14.7519	14.6345	14.8772	14.6946	14.5966	14.6543	14.7079	14.8756	14.7952
ENSRNOG00000006762	13.7634	13.6464	13.8569	13.6913	13.6991	13.7345	13.8205	13.7611	13.8252	13.8132	13.9292	13.7445	13.7365	13.8836	13.6889	13.8375	13.7165
ENSRNOG00000006766	12.8784	12.3701	12.7023	12.2055	12.8259	13.0541	12.6129	12.5655	12.596	12.5783	12.8219	12.6789	12.6188	12.6586	12.7964	12.8501	12.3678
ENSRNOG00000006771	4.65712	5.2747	4.92939	4.84898	5.12147	5.23467	5.54157	5.68082	4.5618	5.13142	4.87002	5.09671	5.07107	5.31851	5.41447	4.39519	5.19957
ENSRNOG00000006779	12.5259	11.9834	12.3558	12.4928	12.3194	12.7674	12.4763	12.35	12.5483	12.0086	12.2631	12.4333	12.5986	12.2615	12.5951	12.3379	12.1033
ENSRNOG00000006784	9.9064	10.2749	10.2787	10.9869	9.95012	10.0304	11.1115	10.9395	10.5908	10.421	10.5983	10.2647	10.2592	10.2792	10.417	10.3888	10.85
ENSRNOG00000006785	12.7913	12.8066	12.7972	12.8698	12.3102	12.4269	12.6235	12.7618	12.8844	13.0133	12.7719	12.6929	12.797	12.7508	12.6866	12.5339	12.8702
ENSRNOG00000006787	13.1963	13.4352	13.3349	13.5667	13.2511	13.2065	13.7529	13.9316	13.8487	13.6872	13.6457	13.3759	13.4458	13.4588	13.4881	13.5678	13.6078
ENSRNOG00000006789	11.8289	11.7915	12.1147	11.653	11.653	11.8088	11.4952	11.61	11.8458	11.5611	11.6994	11.7864	11.5142	11.9865	11.727	11.7969	11.6718
ENSRNOG00000006795	12.6209	12.4443	12.3836	12.6644	12.587	12.7628	12.6675	12.4959	12.6067	12.3663	12.5312	12.5663	12.6059	12.4963	12.5319	12.6868	12.4712
ENSRNOG00000006800	12.933	13.2179	13.0981	13.3504	12.7459	12.8904	13.1365	13.3037	13.3164	12.7632	13.1951	13.0296	12.8768	13.0894	13.0645	13.0162	13.3511
ENSRNOG00000006802	13.2709	12.9745	13.3145	12.9511	13.2937	13.3709	13.307	13.3001	13.2915	13.5421	13.231	13.2322	13.3987	13.3497	13.1654	13.2355	13.1289
ENSRNOG00000006807	6.53071	7.01783	6.39565	6.64314	6.33663	6.2847	6.1213	6.55672	6.52177	6.38148	6.66171	6.50989	6.10093	6.55057	6.72884	6.75181	6.35445
ENSRNOG00000006810	13.6394	13.6184	13.5849	13.7535	13.6187	13.7313	13.8705	13.7717	13.6974	13.6581	13.5125	13.6587	13.6022	13.7439	13.6362	13.6503	13.7452
ENSRNOG00000006818	14.0853	14.0715	14.2236	13.9205	14.1077	14.1447	14.2438	14.1022	14.1565	14.0342	14.0149	14.0762	13.9178	14.0213	14.1936	14.0492	14.3057
ENSRNOG00000006819	4.64885	4.79141	4.99965	4.64258	5.04624	5.13272	5.01191	4.75267	4.49895	4.90666	4.97136	4.87033	4.91475	5.05866	4.5981	4.87069	4.8412
ENSRNOG00000006831	10.7984	11.2042	10.82	11.5049	10.8979	11.0933	11.1169	11.3889	11.0583	10.8505	10.7863	11.0369	10.7334	10.8857	11.3939	11.2647	10.9522
ENSRNOG00000006832	13.2315	13.123	12.9976	13.4085	12.9631	12.8666	13.2405	13.5443	13.4855	13.4483	13.4401	13.1365	13.2388	13.1917	13.2079	13.3284	13.2148
ENSRNOG00000006839	11.5061	11.2785	11.3463	11.4819	11.1855	11.2004	11.2151	11.3985	11.3004	11.5771	11.1286	11.3339	11.2987	11.3554	11.3524	11.2614	11.3798
ENSRNOG00000006844	11.8358	12.0151	11.7315	11.8075	12.001	12.085	12.1827	12.1344	12.1033	12.0487	11.782	11.9306	11.9201	11.8993	12.0798	11.9888	11.9611
ENSRNOG00000006853	12.889	12.7911	12.7374	12.6392	12.2991	12.635	12.8024	12.9026	12.953	12.6327	12.8188	12.7321	12.5018	13.0245	13.0722	12.5287	12.5521
ENSRNOG00000006855	5.32448	5.13822	5.48514	5.41298	6.11616	5.98591	5.7216	5.86362	5.4823	5.27692	5.61434	5.61308	5.9282	5.82718	5.29947	5.63697	5.24469
ENSRNOG00000006858	12.4471	12.0877	12.5765	12.218	12.2996	12.3666	12.1744	11.9169	12.3154	11.8378	11.9813	12.2987	12.0511	12.3205	12.3214	12.1986	12.1762
ENSRNOG00000006859	13.609	13.4	13.6303	13.5473	13.5346	13.6661	13.5918	13.2998	13.3328	13.3701	13.448	13.5612	13.6161	13.5743	13.4736	13.3354	13.5093
ENSRNOG00000006865	14.2652	14.3505	14.291	14.2489	14.6228	14.6697	14.6188	14.3678	14.3675	14.403	14.5319	14.4185	14.6508	14.3019	14.3655	14.4656	14.3621
ENSRNOG00000006868	13.7642	13.5926	13.6458	13.798	13.5339	13.5408	13.5765	13.5751	13.5922	13.645	13.6886	13.619	13.5263	13.5563	13.6131	13.7387	13.7181
ENSRNOG00000006870	12.0844	11.7748	12.0983	11.8827	12.0182	12.1923	12.1771	11.8784	11.9771	11.8276	11.9713	11.9982	11.8939	12.063	11.9762	12.0216	11.997
ENSRNOG00000006871	12.1198	12.2285	12.3215	12.6258	12.0494	12.0106	12.1347	12.3306	12.2591	12.2591	12.1706	12.197	12.1021	12.123	12.192	12.3473	12.3575
ENSRNOG00000006873	6.19557	5.01859	5.61051	6.08433	5.22231	5.05757	5.71708	5.44079	5.75659	5.96717	5.60007	5.53174	5.65845	5.35785	5.58046	5.57405	5.81647
ENSRNOG00000006874	5.11931	5.4929	5.26549	5.12437	4.97714	4.70157	5.21648	5.12202	5.33468	5.23838	5.16493	5.12666	5.07606	5.39945	4.98362	4.81277	5.507
ENSRNOG00000006876	11.9946	8.87057	10.1565	9.10254	10.9219	9.9491	9.75754	9.21014	10.5821	10.4397	11.3782	10.1909	10.0272	9.45002	11.2453	11.4775	8.85967
ENSRNOG00000006877	10.6686	11.1491	10.624	10.9464	10.6315	10.7356	11.226	10.778	11.0075	10.9925	10.9547	10.8518	10.7994	11.0687	11.0431	10.9238	10.5615
ENSRNOG00000006878	7.27814	6.08606	6.52674	6.2944	6.92654	6.7888	6.38308	6.62265	6.90672	6.73391	6.67446	6.70612	6.46629	6.76297	7.22516	7.25239	5.60546
ENSRNOG00000006889	5.87915	6.21104	6.15115	5.9819	5.75063	6.06841	5.83479	6.29089	5.95938	5.64495	5.91545	5.96901	5.37071	6.10475	6.20334	6.06252	6.1152
ENSRNOG00000006894	11.4188	11.1128	11.634	11.093	11.3827	11.5586	11.6296	11.306	11.4101	11.4352	11.4787	11.3772	11.3639	11.3584	11.4731	11.3615	11.4533
ENSRNOG00000006899	9.22405	7.13189	8.68982	6.86985	8.9267	8.80746	7.81309	7.95683	8.58748	8.12677	8.91426	8.39407	8.50979	8.16084	9.22624	8.66108	6.89779
ENSRNOG00000006901	11.9865	11.2575	11.5625	11.6274	11.7977	11.6982	11.4046	11.2903	11.521	11.3705	11.5095	11.595	11.4544	11.3746	11.5962	11.8976	11.4445
ENSRNOG00000006911	10.2023	11.2931	10.8322	10.7377	10.5815	10.7067	11.2346	11.7699	11.4257	11.738	11.4913	10.8011	10.8838	11.0252	10.9474	11.3123	11.1172
ENSRNOG00000006913	10.9443	10.6623	10.9155	10.8229	10.6865	10.8432	10.538	10.5001	10.7225	10.4879	10.5474	10.7705	10.529	10.751	10.78	10.8213	10.6492
ENSRNOG00000006916	10.0177	10.2736	10.0127	10.0775	10.0548	9.93272	9.79712	9.71611	9.89661	9.82628	9.96029	10.0386	9.96258	10.018	9.99803	9.97488	9.89585
ENSRNOG00000006920	6.31635	6.27653	6.45696	6.48976	6.88042	6.75733	6.74422	6.52555	6.62109	6.55284	5.61739	6.50377	6.68647	6.54094	6.12919	6.33849	6.70255
ENSRNOG00000006926	6.14968	4.8584	4.792	4.86674	5.2794	5.74366	5.61693	5.36118	5.60264	5.14936	6.06004	5.34325	5.20213	5.37896	5.81827	5.845	4.7536
ENSRNOG00000006931	11.2679	11.1956	11.6779	11.3526	11.4662	11.4848	11.1995	11.5122	11.499	11.3965	11.4395	11.4005	11.3851	11.4572	11.3171	11.6171	11.2605
ENSRNOG00000006934	10.0188	10.4351	9.99861	10.7571	9.7395	9.70361	10.8803	10.7793	10.635	11.1148	10.5826	10.1839	10.2644	10.4098	10.3281	10.484	10.482
ENSRNOG00000006946	9.34035	8.81605	9.17439	8.60075	9.69346	9.40049	9.15852	8.62	8.39293	9.34457	9.15262	9.16153	9.17379	9.14402	9.11051	9.198	8.74826
ENSRNOG00000006947	11.7006	11.6096	11.5205	11.4951	11.6151	11.7466	11.3943	11.652	11.5493	11.268	11.5058	11.5674	11.2545	11.6404	11.5243	11.7297	11.6143
ENSRNOG00000006949	13.8496	13.7252	13.8239	13.7299	13.7109	13.6158	13.6446	13.718	13.7104	13.7008	13.6769	13.7505	13.6262	13.8102	13.8629	13.6564	13.6571
ENSRNOG00000006950	7.89887	7.46602	7.68495	7.54514	7.97764	8.06547	8.02593	7.50625	7.82069	7.43555	6.81891	7.71499	7.7475	7.25435	7.79496	7.30373	8.22662
ENSRNOG00000006957	12.1066	11.8094	11.9019	12.3274	11.5322	11.4794	11.8115	11.64	11.639	11.7776	11.5812	11.8416	11.8778	11.7368	11.803	11.3532	12.1767
ENSRNOG00000006963	8.54718	7.41992	8.16756	8.36513	8.46293	7.99044	8.69922	8.05255	8.13763	8.28409	8.28455	8.26469	8.50742	8.26563	8.65601	8.15873	7.5355
ENSRNOG00000006966	13.3919	13.2436	13.3606	13.1574	13.5279	13.4196	13.2726	13.3224	13.3039	13.5201	13.3689	13.3804	13.5936	13.3765	13.3524	13.3007	13.1605
ENSRNOG00000006967	11.4507	11.023	11.2441	11.3004	11.2471	11.1895	11.1333	11.206	10.9808	11.3329	11.0013	11.2124	11.1133	11.2539	11.0892	11.18	11.3347
ENSRNOG00000006968	10.361	10.5129	10.5258	10.3494	10.6505	10.6724	10.889	10.4738	10.464	10.2107	10.5113	10.4963	10.3557	10.5385	10.5003	10.4528	10.6988
ENSRNOG00000006973	10.8897	10.9481	10.9752	10.7372	10.6514	10.8005	10.8625	10.8396	10.9544	10.596	10.9989	10.869	10.5684	11.2265	11.0242	10.8163	10.5875
ENSRNOG00000006978	10.2037	9.96513	10.2297	10.2576	10.0195	10.0832	10.0484	9.98943	9.91514	9.84571	10.1007	10.1187	9.71918	10.3414	10.2491	10.2869	9.73789
ENSRNOG00000006979	15.3764	15.4174	15.3822	15.2281	15.5154	15.4858	15.5054	15.3659	15.3552	15.368	15.2131	15.4209	15.62	15.6867	15.0758	15.0287	15.5264
ENSRNOG00000006980	12.7288	12.771	12.8595	12.7755	12.9395	12.8532	13.0646	12.8592	12.7334	12.9491	12.7276	12.8465	12.7559	13.0137	12.9217	12.8564	12.6647
ENSRNOG00000006983	11.1855	10.8874	11.2025	11.2047	11.1312	11.1156	10.9168	10.8812	10.9275	10.9832	11.0812	11.1027	11.1781	10.9319	11.0878	11.0996	10.9709
ENSRNOG00000006989	14.0229	14.661	13.9283	14.3873	14.2807	14.5096	14.8271	14.7513	14.6331	14.6528	14.5445	14.3512	14.5369	14.5605	14.2737	14.5322	14.387
ENSRNOG00000006990	5.99362	6.12873	5.8793	7.31904	5.36288	5.10618	5.65461	6.48991	5.8902	6.03906	5.72926	5.82423	5.49521	5.45727	5.67585	6.044	7.05933
ENSRNOG00000006997	15.328	15.2992	15.2419	15.3392	15.3613	15.4256	15.3668	15.3557	15.3956	15.3613	15.4093	15.3234	15.4443	15.3257	15.1457	15.4239	15.4081
ENSRNOG00000006998	8.40106	7.82208	8.23991	8.02106	8.14081	8.35876	8.11974	8.25035	8.13102	8.37772	8.45691	8.19374	7.94124	8.49393	8.32478	8.69476	7.5893
ENSRNOG00000006999	11.6324	10.1568	11.0133	11.3283	10.9049	10.9918	10.3234	10.484	11.0173	10.4241	11.1626	10.9587	10.8689	10.383	11.3486	11.568	10.1823
ENSRNOG00000007002	5.87664	5.8548	5.52815	5.20862	5.77621	5.58401	5.75119	6.68634	6.25266	6.52015	6.50221	5.73173	5.81268	6.18964	5.75477	6.10749	5.79086
ENSRNOG00000007006	6.3261	6.13555	6.87881	6.23731	5.36374	5.54871	5.35652	5.54289	6.38406	6.26627	6.18742	6.05217	5.89063	5.99912	6.08956	6.02679	6.11616
ENSRNOG00000007014	12.8307	13.6146	13.4279	13.4275	13.8892	13.8624	14.1384	13.966	13.7269	13.6846	13.7166	13.5401	13.6321	13.6258	13.5506	13.9772	13.4523
ENSRNOG00000007023	11.8029	11.1296	11.4417	11.3766	11.5462	11.4808	11.156	11.2775	11.5045	11.2904	11.6031	11.4478	11.2704	11.4063	11.5753	11.8666	10.9938
ENSRNOG00000007027	7.65517	8.33109	7.3653	8.90682	7.37561	7.53035	8.72196	8.99973	8.59506	7.58835	8.50755	8.02666	7.73406	8.54614	8.79535	8.14956	7.42169
ENSRNOG00000007029	14.7491	14.7576	14.7479	14.6898	14.7364	14.7378	14.7094	14.7323	14.6188	14.641	14.5697	14.7172	14.5474	14.7453	14.7437	14.6571	14.8128
ENSRNOG00000007030	11.5128	11.2934	12.0715	10.9383	11.8713	11.9817	11.569	11.7087	11.7817	12.1302	11.8998	11.6208	11.6363	11.8659	11.416	12.1118	11.446
ENSRNOG00000007031	11.9949	12.2489	12.1012	12.273	12.3269	12.4246	12.7857	12.7094	12.5975	12.4725	12.5848	12.2791	12.4257	12.4708	12.2457	12.5575	12.2755
ENSRNOG00000007032	12.8155	12.193	12.8442	11.6138	12.6391	12.6193	12.337	11.9882	12.2671	12.1771	12.4716	12.5067	12.1093	12.9161	12.8105	12.295	11.7594
ENSRNOG00000007036	11.8712	11.6991	11.6957	11.7006	11.886	11.9264	11.707	11.8015	11.5344	11.9642	11.7342	11.8479	12.0171	11.9389	11.8965	11.6598	11.4047
ENSRNOG00000007038	10.1255	10.1419	10.159	11.1874	9.57318	9.74028	9.95787	10.1639	9.88192	9.93371	10.0038	10.0436	9.98223	10.0135	9.4693	10.0081	10.9003
ENSRNOG00000007040	13.7148	13.5419	13.6258	13.4964	13.6385	13.6258	13.6126	13.4363	13.5037	13.3419	13.5033	13.59	13.4142	13.5906	13.6619	13.5151	13.5886
ENSRNOG00000007041	9.32981	10.0088	9.67594	9.32622	9.9083	9.89035	9.95551	9.22575	10.3847	8.90696	9.95532	9.68343	9.79837	9.52424	9.68887	9.81979	9.60584
ENSRNOG00000007048	14.4098	14.4283	14.3833	14.4287	14.1622	14.3009	14.2335	14.3341	14.4266	14.4069	14.4287	14.3591	14.3378	14.3489	14.4321	14.3826	14.2913
ENSRNOG00000007051	13.7909	13.7373	13.7582	13.7657	13.9878	14.099	14.1617	13.9673	13.9121	13.8311	13.9856	13.8615	13.8651	13.8986	13.8513	14.0621	13.8385
ENSRNOG00000007059	5.55136	5.61581	5.70857	5.33407	5.31375	5.92353	5.56667	5.47809	5.77534	5.46871	5.92237	5.57896	5.61068	5.48699	5.66593	5.69536	5.55173
ENSRNOG00000007060	12.3751	11.8515	12.2013	12.2963	12.2009	11.9831	11.9766	11.8043	12.0099	11.9457	12.251	12.1533	12.2672	12.0826	12.1215	12.1228	11.8562
ENSRNOG00000007066	8.0469	7.71381	7.75676	8.35415	7.30885	7.65515	8.28422	8.54044	8.10322	7.52779	8.33337	7.76673	7.09634	7.95441	8.01417	8.24301	8.40197
ENSRNOG00000007067	5.17592	4.9045	4.68751	5.28663	4.79866	5.21478	5.05094	5.16196	5.39056	4.74965	4.44639	5.00374	5.27296	5.00239	4.6903	4.66822	5.31537
ENSRNOG00000007069	13.297	13.2318	13.2732	13.5677	13.2801	13.1705	13.0542	12.9893	12.9443	12.9763	12.986	13.2831	13.3865	13.0935	13.2475	12.9436	13.207
ENSRNOG00000007078	7.56613	7.43946	7.56564	7.62844	7.71446	7.94048	7.34737	7.3712	7.72004	6.89698	7.77706	7.54068	7.1435	7.09118	7.77681	8.36333	7.33649
ENSRNOG00000007081	10.108	10.2362	9.99934	10.2269	10.1695	10.1353	10.0078	10.0746	9.99801	9.97921	10.0727	10.0686	9.95607	9.69326	10.0928	10.25	10.4521
ENSRNOG00000007084	6.80521	5.2117	6.60344	5.88252	6.05386	6.30872	5.97459	5.93321	6.12191	5.59553	6.75136	6.29922	7.01923	6.01293	6.79539	5.31754	5.53127
ENSRNOG00000007089	13.3812	12.95	13.1677	13.1256	13.2614	13.0534	12.9884	13.1563	13.1848	13.1672	13.1943	13.1423	13.1051	12.9831	13.2532	13.2865	13.1096
ENSRNOG00000007090	10.1817	10.6082	10.3648	9.94819	9.97145	10.5442	10.8306	10.9895	10.9851	10.6724	10.7178	10.387	10.3698	10.7326	10.7618	10.2986	10.3949
ENSRNOG00000007091	13.7356	14.2138	14.1491	13.9872	14.0796	14.1598	14.0899	14.2426	14.2423	13.8997	14.2056	14.031	13.8445	13.9683	14.1412	14.34	14.1267
ENSRNOG00000007092	5.20961	5.24024	4.60171	4.76596	4.9055	4.66583	4.67178	4.95448	5.22163	4.79164	4.85838	4.90244	5.01001	4.80999	4.91314	4.6052	5.15783
ENSRNOG00000007104	14.0582	13.809	14.1095	13.6755	14.4126	14.2396	14.1045	14.0593	13.8823	14.2608	14.2193	14.0965	14.1897	14.1832	14.1911	14.2068	13.6193
ENSRNOG00000007111	13.1604	13.1307	13.2721	13.233	13.2925	13.2275	13.1897	13.1689	13.0748	13.1237	13.1582	13.2227	13.234	13.1832	13.2709	13.1522	13.106
ENSRNOG00000007114	13.6063	13.6239	13.7445	13.6343	13.6015	13.6444	13.5375	13.7647	13.7244	13.6615	13.6706	13.6323	13.621	13.5638	13.6506	13.6831	13.7463
ENSRNOG00000007115	13.4236	13.3607	13.4289	13.4814	13.1152	13.3229	13.2204	13.3437	13.3313	13.3927	13.1138	13.3475	13.288	13.2329	13.4742	13.1944	13.4328
ENSRNOG00000007117	12.8811	12.9133	12.9966	13.038	12.6926	12.8234	12.6357	12.652	12.8137	12.5961	12.8341	12.8825	12.7528	12.97	12.875	12.8474	12.6349
ENSRNOG00000007120	11.5702	11.4616	11.5461	11.3058	11.555	11.734	11.7154	11.9393	11.8146	11.6659	12.0003	11.5647	11.6201	11.6268	11.6627	11.7581	11.5944
ENSRNOG00000007124	12.8542	12.4787	12.7506	12.565	12.8683	12.6348	12.3644	12.2147	12.466	12.5388	12.4452	12.6769	12.5496	12.6019	12.789	12.767	12.1709
ENSRNOG00000007125	10.7767	10.5879	10.7399	10.6764	10.6672	10.7833	10.6103	10.6201	10.5578	10.7235	10.7491	10.6913	10.4197	10.6814	10.8894	11.0172	10.404
ENSRNOG00000007126	11.4703	11.3983	11.5654	11.3846	11.6015	11.5803	11.6056	11.6201	11.6669	11.4932	11.5025	11.5219	11.6352	11.5037	11.5576	11.447	11.525
ENSRNOG00000007128	13.6011	13.7118	13.7788	13.7601	13.8552	13.8721	13.9774	13.9289	13.772	13.6714	13.884	13.7854	13.8597	13.756	13.874	13.7441	13.7626
ENSRNOG00000007129	5.79221	5.79572	5.51389	5.29947	6.12667	5.8612	6.209	5.89231	6.38591	5.96808	5.72687	5.68767	5.7537	5.60356	5.44265	6.06104	6.38019
ENSRNOG00000007134	13.5896	13.5515	13.5952	13.6459	13.4728	13.4436	13.4557	13.53	13.5744	13.5781	13.5503	13.5516	13.4865	13.6306	13.5485	13.6043	13.4558
ENSRNOG00000007136	11.9095	12.2121	11.9372	11.9643	12.2636	12.4584	12.793	12.6705	12.4996	12.2156	12.3863	12.1626	12.0852	12.2517	12.3808	12.4437	12.2602
ENSRNOG00000007137	4.80097	4.68029	4.63716	4.47969	4.299	4.55763	4.36731	4.4627	4.57619	4.44379	4.13217	4.60662	4.26589	4.86362	4.87529	4.29046	4.24347
ENSRNOG00000007139	11.1175	11.4011	11.167	11.1453	11.4037	11.3527	11.2111	10.9954	11.0441	10.8739	10.8051	11.2482	11.0771	11.2436	11.3255	11.0402	11.0693
ENSRNOG00000007142	12.68	12.841	13.0601	12.3707	13.0209	13.1417	13.2606	13.3587	13.3465	13.4227	13.4729	12.9489	13.1198	13.1664	13.1397	13.2448	12.689
ENSRNOG00000007152	13.5391	13.2844	13.1714	12.7525	13.0086	13.0657	12.6915	12.8909	12.6632	13.7464	13.4876	13.1143	13.1905	12.9617	13.0548	13.0588	13.3233
ENSRNOG00000007158	10.1105	10.3066	10.2965	9.69481	10.5697	10.5068	10.3227	10.3445	10.2949	10.1422	10.2721	10.2292	10.0517	10.3174	10.2085	10.376	10.3283
ENSRNOG00000007159	8.03394	5.42257	6.03656	6.7895	6.2175	6.35881	5.41685	5.66639	5.77442	6.32617	7.03568	6.30554	5.63572	5.69997	6.55527	7.75721	5.7665
ENSRNOG00000007177	10.0961	9.82912	10.0468	10.0971	9.87463	9.94489	10.195	9.54013	9.86733	9.78812	10.0354	9.95133	9.96699	9.86752	9.8388	9.89511	10.1282
ENSRNOG00000007178	5.70809	4.88311	5.20744	4.84584	5.03704	4.93772	4.6959	4.81435	5.10836	4.96812	4.77155	5.07166	4.86006	4.90143	5.26426	4.84623	5.16203
ENSRNOG00000007197	6.07074	5.24323	5.56973	5.92992	5.30223	5.74123	5.17595	5.39876	5.22355	5.90194	5.72486	5.56544	4.8994	5.8555	5.47702	6.63766	4.98255
ENSRNOG00000007206	12.409	10.8353	11.9333	11.8958	11.6397	11.7064	12.0554	11.8011	11.6895	12.129	11.8099	11.8067	12.2432	11.8316	11.7661	11.3881	11.8167
ENSRNOG00000007213	13.4497	13.2382	13.4581	13.4815	13.2435	13.3716	13.3906	13.3942	13.2275	13.2004	13.33	13.3541	13.0958	13.4747	13.3742	13.3862	13.3957
ENSRNOG00000007221	10.634	10.2421	10.4327	10.503	10.084	10.403	10.1635	10.0902	10.2565	9.70803	10.2839	10.3298	9.84406	10.4037	10.4213	10.4059	10.2432
ENSRNOG00000007229	7.01411	5.57027	5.83738	5.63986	6.46932	6.3255	6.63446	6.27405	6.08912	6.0416	6.05642	6.17208	6.18088	5.6479	6.86347	5.72893	6.46289
ENSRNOG00000007231	5.08843	5.30278	5.19098	4.8073	5.14909	4.93144	5.44727	5.60924	4.77751	5.18239	5.80875	5.19288	4.94548	5.16859	6.15185	4.87008	4.8978
ENSRNOG00000007234	13.441	13.4379	13.3767	13.4124	13.5198	13.464	13.353	13.2514	13.2257	13.1946	13.2248	13.4332	13.3695	13.4861	13.3914	13.2846	13.2889
ENSRNOG00000007235	13.9845	13.8324	13.8644	13.7329	14.0695	13.927	14.0894	14.1148	14.0851	14.0214	14.0196	13.9131	13.9715	13.8682	13.9679	13.9529	14.0839
ENSRNOG00000007237	13.3575	13.4024	13.4764	13.637	13.5489	13.5191	13.5588	13.1757	13.4051	13.4301	13.5466	13.4542	13.6103	13.3654	13.171	13.6351	13.5138
ENSRNOG00000007238	5.43001	5.50593	5.63388	5.65998	5.27811	5.55378	5.67535	5.45364	5.68328	5.22406	5.06311	5.53284	5.06265	5.98198	5.68919	5.54835	5.10199
ENSRNOG00000007240	9.89572	9.81143	10.1337	9.70342	9.85803	9.92583	9.97938	9.96205	9.9733	9.6127	10.1476	9.90796	9.73668	10.1158	9.99102	9.8461	9.8564
ENSRNOG00000007243	5.57141	5.65861	5.16466	5.50489	5.81275	5.62173	5.79134	5.47509	5.68539	5.44407	5.23888	5.58936	5.7187	5.96413	5.28737	5.43722	5.33372
ENSRNOG00000007249	12.7575	12.0193	12.5714	11.5471	12.2215	12.6308	11.3629	10.7164	11.3228	11.7288	11.706	12.1727	11.7105	11.6716	12.4246	12.0817	11.6489
ENSRNOG00000007255	6.73668	5.65161	6.70982	6.60175	6.41588	6.25011	6.27676	6.10932	6.12292	6.38401	6.69016	6.40025	6.10418	6.18169	6.95054	6.94114	5.64221
ENSRNOG00000007256	12.8474	12.7997	12.374	13.6101	12.0554	12.2253	12.8577	12.8736	12.8215	12.0778	12.3881	12.5564	12.3216	12.3705	12.4036	12.3068	13.7036
ENSRNOG00000007262	10.8541	11.2566	11.4127	10.8789	11.7971	11.525	11.3018	10.8262	10.8271	11.0263	10.6156	11.2716	11.2788	11.3198	11.1211	10.9713	11.0004
ENSRNOG00000007266	7.73184	5.55212	7.33545	6.47348	7.55731	7.49595	7.20701	7.13539	7.29969	6.82932	7.56065	7.14408	7.2967	7.16514	7.68872	7.50605	5.90112
ENSRNOG00000007267	11.5318	11.453	11.6275	11.5244	11.5507	11.5943	11.6402	11.4743	11.5054	11.2804	11.4254	11.5515	11.3206	11.6274	11.7337	11.5376	11.3545
ENSRNOG00000007272	11.9517	11.5883	11.9266	11.8229	11.8924	11.7791	11.7579	11.8549	11.8122	11.8178	11.7129	11.8313	11.7103	11.9289	11.8819	11.8929	11.6515
ENSRNOG00000007280	13.1084	12.7717	12.9156	12.8479	13.0637	13.0818	13.0663	13.1353	13.0493	13.1352	13.095	12.9548	13.0124	12.8567	12.9349	13.1343	13.1426
ENSRNOG00000007284	14.6176	14.6395	14.479	14.5655	14.5236	14.3791	14.4584	14.4885	14.4784	14.4885	14.4914	14.525	14.5322	14.4294	14.5594	14.3606	14.6773
ENSRNOG00000007286	11.0891	9.98471	10.9856	10.4537	11.0895	10.8471	10.5763	10.6105	10.5429	11.0457	10.6948	10.7443	10.6762	10.6488	10.9242	11.1272	10.2381
ENSRNOG00000007290	14.9153	14.938	14.8632	15.0259	14.974	14.7943	14.8482	15.0194	15.0781	15.131	15.0695	14.948	14.9692	14.942	15.1103	15.2201	14.5901
ENSRNOG00000007291	10.1966	9.67533	10.0089	10.3298	10.0752	10.1367	9.98774	10.0095	9.95098	9.82188	9.87696	9.99532	9.82605	9.79309	9.91631	10.3358	10.1538
ENSRNOG00000007292	8.263	7.26853	8.03108	7.83144	7.96019	7.85137	7.68532	7.87262	7.94876	7.76173	8.06462	7.89821	7.64047	8.00512	8.23272	8.32146	7.15463
ENSRNOG00000007299	11.7595	11.8717	11.8918	11.9611	11.9045	11.8273	11.9535	11.8711	11.8676	11.8939	11.8051	11.8544	11.7118	12.0417	11.7203	12.0467	11.835
ENSRNOG00000007300	7.30325	6.72395	7.23875	6.7054	7.79213	7.94554	8.23472	7.93167	7.76649	7.82641	7.36604	7.36622	7.38524	7.655	7.54672	7.82952	7.13699
ENSRNOG00000007301	7.47948	7.5633	7.10647	7.63645	7.69693	7.37579	7.88164	7.88477	7.66667	7.81736	7.35501	7.43739	7.17312	7.61396	7.29105	7.9645	7.80535
ENSRNOG00000007302	10.3219	9.50611	10.5917	9.23761	11.176	10.5521	10.2578	9.82692	9.95507	10.6914	10.7987	10.211	10.4727	10.1333	9.90738	10.8564	9.92288
ENSRNOG00000007310	6.67815	6.77555	6.36052	7.02106	6.36411	6.92589	6.63919	6.98132	6.81096	6.36004	6.65699	6.74734	6.89411	7.08043	6.62627	6.51437	6.36276
ENSRNOG00000007316	14.0422	14.0342	14.0779	14.0938	13.8246	13.8684	13.8123	13.8705	13.9995	13.7934	14.0486	13.9752	13.8658	13.9661	14.0037	13.9665	13.9691
ENSRNOG00000007319	7.43458	7.65575	7.36458	7.06037	7.17064	7.44014	6.45205	6.59057	6.54956	6.58021	7.62038	7.1389	6.49927	7.0929	6.53189	7.61006	7.71674
ENSRNOG00000007323	11.5586	11.2874	11.4	11.4812	11.2079	11.2785	11.3981	11.266	11.2779	11.3778	11.1677	11.3454	11.1977	11.4237	11.2733	11.251	11.5419
ENSRNOG00000007326	12.7769	12.9197	13.0263	13.363	12.9266	12.821	13.1538	14.0677	13.641	13.9461	13.0886	13.0648	13.7034	13.1802	12.8663	13.0165	13.3646
ENSRNOG00000007327	9.54736	9.23152	9.71241	9.28768	9.75528	9.96561	9.81699	9.61508	9.71777	9.36461	9.75033	9.57324	9.40358	9.7769	9.47882	9.96114	9.42937
ENSRNOG00000007330	14.8159	14.8094	14.842	14.8735	14.8704	14.8384	14.8029	14.8967	14.9309	14.8591	14.8421	14.8522	14.8451	14.8717	14.903	14.9577	14.6862
ENSRNOG00000007332	10.2385	11.2981	10.5382	11.0655	10.4515	10.6548	11.4181	11.6164	11.5081	10.7693	10.9707	10.796	10.7146	11.127	11.0759	10.8121	10.9597
ENSRNOG00000007335	7.41619	8.22531	8.23845	8.0692	8.58783	8.20084	8.70888	8.50783	8.34048	8.51492	7.79659	8.18635	8.79175	8.16494	7.98265	7.75005	8.46505
ENSRNOG00000007346	8.83571	10.0743	9.35954	9.63572	9.69565	9.65343	10.4021	10.1858	10.0675	10.1829	9.93729	9.59461	9.65043	9.73656	9.71016	10.1479	9.72367
ENSRNOG00000007348	4.57802	5.64216	5.05018	4.87094	4.94657	4.89999	4.97873	4.36284	4.55301	4.89899	4.6109	4.93783	4.77678	4.93645	4.73934	4.62182	5.24525
ENSRNOG00000007350	9.03013	7.96407	8.64415	8.27482	9.18387	9.13314	9.19243	9.61801	9.28977	8.97687	8.86776	8.76905	9.03393	8.78645	8.87089	8.92991	8.91026
ENSRNOG00000007351	12.309	12.2019	12.3894	12.1757	12.4806	12.5139	12.4269	12.0781	12.2014	12.0986	12.1673	12.3349	12.209	12.3864	12.3482	12.3453	12.1291
ENSRNOG00000007354	6.3787	4.61533	5.68485	5.4019	6.05439	5.63144	5.55396	5.20311	5.64248	5.08612	5.62521	5.61185	5.56066	5.6817	5.4977	5.77463	5.20342
ENSRNOG00000007356	13.0144	13.1014	13.1461	13.1945	13.1999	13.2754	13.2968	13.1078	13.056	12.9376	12.9944	13.1551	13.0232	13.1741	13.267	13.167	12.9916
ENSRNOG00000007364	13.6435	14.0876	13.7338	14.1039	13.9412	13.831	14.1066	14.1317	14.139	13.9301	13.9316	13.8847	13.8562	13.8464	13.9183	14.1423	13.9996
ENSRNOG00000007367	14.7876	14.4881	14.7544	14.4273	14.6673	14.6294	14.4992	14.5357	14.5433	14.8688	14.5015	14.6363	14.8167	14.6791	14.4768	14.3944	14.6957
ENSRNOG00000007369	14.7388	14.6541	14.8275	14.7196	14.8199	14.7762	14.8612	14.4448	14.5469	14.7214	14.5876	14.7331	14.7187	14.7198	14.6235	14.667	14.7902
ENSRNOG00000007370	10.4923	10.9037	9.73885	10.6925	10.4896	10.6716	11.2162	11.1818	10.7596	11.2335	10.5455	10.5909	10.9823	10.7226	10.625	10.4763	10.7184
ENSRNOG00000007372	8.71865	7.46724	7.58173	8.08509	7.62972	8.11293	7.70307	7.6811	7.74536	7.93964	8.30402	7.9193	7.81549	8.10239	7.76045	8.38157	7.47909
ENSRNOG00000007374	12.3336	10.8457	12.699	12.485	10.7903	10.9527	11.1385	11.0273	11.1688	9.96359	11.7677	11.6586	11.057	11.8551	11.9091	10.6656	11.5772
ENSRNOG00000007375	6.02782	5.89984	5.77526	5.58617	5.48513	5.37566	5.61934	5.80628	5.83101	5.99766	5.97924	5.74724	5.44202	6.11509	6.01816	5.75839	5.46805
ENSRNOG00000007377	10.1603	10.8119	10.4391	10.1829	10.8443	10.9535	11.313	11.1459	11.0518	10.9445	10.9493	10.5839	10.348	10.8482	10.6673	11.2933	10.7121
ENSRNOG00000007378	8.16629	8.17449	7.97755	7.91035	8.35962	8.06654	8.15273	8.01288	7.9402	8.05353	7.97136	8.16115	8.23551	7.87489	8.68513	7.81633	7.79905
ENSRNOG00000007387	12.295	13.2085	12.2104	12.5716	12.6332	12.6487	13.4	12.8593	12.7809	12.9248	12.6909	12.6477	12.7556	12.7853	12.7211	12.4643	12.9516
ENSRNOG00000007392	14.3831	14.2248	14.2827	14.2383	14.2231	14.0955	14.1456	14.0077	14.1209	13.9628	14.2877	14.2161	14.037	14.1806	14.2797	14.1888	14.2324
ENSRNOG00000007393	13.0185	12.439	12.5977	12.1869	12.9245	12.6761	12.653	12.763	12.494	13.1041	12.5255	12.6723	13.0431	12.6593	12.506	12.1841	12.964
ENSRNOG00000007395	6.23344	5.39945	5.62522	6.24291	5.84254	6.36535	5.7901	5.89132	6.37285	5.70633	6.34882	5.9523	6.39713	5.60562	5.85906	6.53526	5.50164
ENSRNOG00000007400	12.819	13.2323	13.3627	12.9573	13.2623	12.9606	13.2128	13.2064	12.5225	13.3207	13.422	13.0932	12.9935	13.1433	13.1075	12.9778	13.3452
ENSRNOG00000007404	9.37926	9.27853	9.5531	9.22949	9.37615	9.44293	9.37044	9.17554	9.19735	8.99866	9.31353	9.34748	8.9854	9.52923	9.35326	9.3857	9.28089
ENSRNOG00000007410	11.8676	12.3315	12.107	12.2032	12.3958	12.4173	12.5425	12.612	12.3379	12.4722	12.4759	12.2415	12.4112	12.198	12.2417	12.4826	12.3165
ENSRNOG00000007412	8.38513	8.07875	8.35307	8.31186	7.9486	8.4593	8.12048	8.10487	8.47049	7.95664	8.51734	8.27114	8.11186	8.21817	8.57351	8.57821	7.76355
ENSRNOG00000007415	10.0593	9.81145	10.2275	10.0631	10.2319	10.1341	10.0173	9.82176	9.86861	10.0647	9.66734	10.0563	10.1907	9.73974	10.0487	9.87477	10.1667
ENSRNOG00000007416	10.6771	10.4228	10.6466	10.5071	10.3794	10.3904	10.3682	10.5404	10.5239	10.6169	10.7902	10.5167	10.4613	10.5534	10.6119	10.6081	10.4205
ENSRNOG00000007420	9.79639	10.1215	9.98421	9.81552	10.1732	10.1641	10.0383	10.1608	9.90274	9.78874	9.93991	10.0034	9.7443	10.1003	10.1312	10.0871	9.89325
ENSRNOG00000007427	12.0986	12.1522	12.2945	12.276	11.9757	12.1315	12.4949	12.389	12.2774	12.1144	12.2933	12.1629	11.9375	12.2922	12.308	12.1971	12.362
ENSRNOG00000007439	8.30315	7.92898	8.54059	8.35258	8.78405	8.60014	8.73681	8.40476	8.27193	8.38404	8.15268	8.39391	8.50794	8.3267	8.20103	8.41116	8.5734
ENSRNOG00000007442	12.485	12.4661	12.6808	12.479	12.5895	12.5905	12.7638	12.6189	12.4485	12.6376	12.6135	12.5284	12.3136	12.5654	12.5856	12.707	12.6946
ENSRNOG00000007443	6.43456	8.0938	7.54747	8.2293	6.9453	7.40411	6.56917	8.83536	8.49742	7.93473	8.10292	7.51125	7.66747	7.70747	7.5718	8.61315	6.78452
ENSRNOG00000007456	13.5422	13.6195	13.6431	13.9602	13.529	13.5415	13.8914	13.6449	13.7948	13.2707	13.4448	13.6149	13.5227	13.5744	13.6014	13.5114	13.9119
ENSRNOG00000007457	12.1094	10.9083	11.507	10.7679	12.0475	11.3963	11.0162	10.5877	10.9706	11.4895	12.0741	11.4477	11.8796	11.2665	11.1466	11.4956	11.0301
ENSRNOG00000007461	7.35184	6.64586	6.94481	7.04285	7.3233	7.26754	7.20191	7.64614	7.30355	7.02201	7.48779	7.14379	6.86425	7.43906	7.41463	7.74526	6.51811
ENSRNOG00000007468	4.35486	5.13776	4.83041	4.67652	4.7885	4.82979	4.59724	4.98058	4.79088	4.81222	4.73185	4.75954	4.73302	4.42265	5.06233	4.78832	4.86165
ENSRNOG00000007477	7.61149	6.74183	7.34609	6.93804	7.16035	7.12196	7.11265	7.29525	7.28105	7.51103	7.75359	7.227	7.36231	7.19028	7.57068	7.34518	6.81708
ENSRNOG00000007478	13.1475	13.2399	13.0045	13.3137	12.8717	12.6296	13.1492	13.2285	13.2873	13.3967	13.0945	13.0544	13.0525	13.17	13.0607	13.0175	13.2773
ENSRNOG00000007485	12.2042	11.5556	11.8931	11.9156	11.6645	11.6231	11.4059	11.8033	11.8507	11.9572	12.036	11.7561	11.4486	11.6695	11.8309	12.3373	11.731
ENSRNOG00000007486	12.0022	12.0402	11.94	12.0862	12.1614	12.0999	12.1816	12.257	12.2749	12.0702	12.1163	12.045	12.0471	11.9247	12.1037	12.2879	12.1555
ENSRNOG00000007490	8.4159	7.86149	9.70365	7.95158	9.39023	9.16636	8.99607	8.90252	8.73307	8.79299	9.09533	8.85376	8.02081	9.30076	9.87305	9.84658	7.07474
ENSRNOG00000007492	14.2321	13.8503	13.9546	13.9701	13.9686	13.9773	13.919	14.0638	14.0633	14.1194	14.2404	13.9999	14.0179	13.9179	14.1101	14.1775	13.9201
ENSRNOG00000007495	8.39538	5.0775	6.07417	5.30977	5.51217	5.57768	5.29064	5.35721	6.2274	6.06763	5.73164	5.98671	5.45009	6.68913	5.79452	5.5224	5.98436
ENSRNOG00000007500	11.3173	11.5838	11.3599	11.6813	11.3307	11.4135	11.6121	11.5851	11.4534	10.9954	11.4057	11.4165	11.057	11.4802	11.5244	11.4943	11.5892
ENSRNOG00000007504	13.5821	13.2685	13.379	13.4453	13.2917	13.356	13.3395	13.3454	13.3618	13.3224	13.3791	13.3729	13.3211	13.3161	13.3967	13.356	13.4621
ENSRNOG00000007506	12.2277	12.1904	12.1809	12.2436	12.0381	12.1681	12.1706	12.1037	12.0639	12.1654	12.1478	12.1687	12.049	12.2551	12.1655	12.1654	12.1464
ENSRNOG00000007509	7.82042	8.79583	7.90967	8.48105	8.109	7.90233	9.07349	9.08596	9.01353	7.64513	8.50448	8.22963	7.62095	8.62821	8.79924	8.39006	8.43567
ENSRNOG00000007519	10.63	10.7241	10.5554	10.8684	10.6513	10.6559	10.9971	10.8801	10.9395	10.8618	10.7091	10.6893	10.7441	10.5888	10.7853	10.8285	10.856
ENSRNOG00000007523	7.30207	7.07893	6.86362	6.75487	6.93653	7.44172	7.25356	7.17696	6.91551	7.06096	7.2771	7.06304	7.15818	6.82167	7.20979	6.82899	7.44392
ENSRNOG00000007525	5.3647	5.79927	5.67337	5.44336	5.55546	6.08403	5.82663	6.47243	6.05355	5.79906	5.68998	5.74394	5.93837	6.35065	5.48627	5.47991	5.69589
ENSRNOG00000007528	8.91827	8.73848	9.20801	9.18703	8.99533	9.00154	9.52911	9.57308	8.64042	10.1869	9.53969	9.06055	9.07537	9.29898	9.12192	9.49263	9.05458
ENSRNOG00000007529	7.3675	7.45119	7.32965	7.57977	7.13701	7.05634	7.58853	7.94607	7.4483	8.33178	7.65594	7.49929	8.02874	7.9383	7.60506	7.02328	7.06102
ENSRNOG00000007532	13.6639	13.5895	13.6481	13.5394	13.6081	13.6149	13.6598	13.7414	13.6641	13.8307	13.6789	13.6317	13.6409	13.6907	13.6896	13.6524	13.6009
ENSRNOG00000007539	8.75837	7.37073	7.85151	8.24736	8.1336	7.86864	7.52824	7.6464	7.63395	8.4888	8.01755	8.05239	8.42685	7.94469	7.86979	8.16595	7.44223
ENSRNOG00000007542	14.6634	14.6922	14.8074	14.7857	14.7121	14.7504	14.771	14.6541	14.5935	14.5637	14.666	14.6901	14.6554	14.5709	14.5737	14.6282	15.0496
ENSRNOG00000007545	10.3091	10.8047	10.4283	10.4727	10.6556	10.5519	10.5818	10.3892	10.3945	10.0516	10.8373	10.4752	10.2443	10.3492	10.4612	10.7188	10.7024
ENSRNOG00000007546	12.8117	12.6733	12.8569	12.3491	12.8259	12.9237	12.9884	12.9628	12.9501	12.9516	12.8955	12.7886	12.7656	12.9196	12.9717	12.7701	12.7217
ENSRNOG00000007558	6.75075	6.8073	6.88629	6.71976	6.4981	6.40302	6.48974	7.03377	7.07855	6.76049	7.02625	6.75818	6.96549	6.58718	7.20578	6.44235	6.63573
ENSRNOG00000007567	8.74965	8.6969	8.98795	9.0533	8.52037	8.6288	8.26644	8.58948	8.8898	8.42095	8.41085	8.71962	8.68963	8.63895	8.51108	8.63649	8.84142
ENSRNOG00000007568	12.2192	10.9204	11.627	11.5801	11.2615	11.3544	10.4239	10.7746	11.252	11.0199	11.5002	11.4319	11.1355	10.9806	11.8084	11.8321	10.6757
ENSRNOG00000007574	12.7026	12.4964	12.7383	12.4777	12.5127	12.3729	12.4791	12.4214	12.4396	13.0162	12.6047	12.5953	12.9027	12.5625	12.5916	12.2547	12.5505
ENSRNOG00000007575	11.7116	11.7481	12.158	11.3407	11.7768	11.9298	11.7435	11.9735	11.9647	12.0787	11.9384	11.7899	11.6513	11.8186	11.9744	11.9482	11.8268
ENSRNOG00000007576	11.1266	10.8306	11.2758	10.6778	11.1123	10.3805	11.24	10.6625	11.1903	11.7413	10.3476	10.9075	11.2259	10.4268	11.1111	10.3528	11.6621
ENSRNOG00000007578	12.2423	12.0275	12.2476	12.0644	12.2709	12.3253	12.1922	12.0124	12.2494	12.0399	12.0477	12.2092	12.2708	12.1706	12.2634	12.1226	11.986
ENSRNOG00000007581	8.74476	8.4645	8.68749	7.94013	8.50876	8.95668	8.67432	8.82094	9.1862	9.24197	9.15043	8.54962	7.67827	8.95868	9.00733	10.1753	7.86068
ENSRNOG00000007584	10.9042	10.5238	10.8289	10.6946	10.926	11.1186	11.0509	10.8665	10.8368	10.685	10.8767	10.8359	10.7269	10.7692	11.0314	11.0204	10.6784
ENSRNOG00000007587	12.8892	12.3063	12.6681	12.3379	12.7737	12.7354	12.4288	12.3867	12.4903	12.8394	12.7132	12.5967	12.7476	12.4671	12.4455	12.7534	12.5721
ENSRNOG00000007596	11.093	10.3301	10.836	10.3011	11.0479	11.2	11.2597	11.19	11.0829	11.4871	11.0193	10.9077	11.3682	11.0441	10.9485	10.7943	10.7283
ENSRNOG00000007600	13.1013	12.3138	12.8296	13.3527	12.0316	12.1715	11.9799	11.8269	12.2872	11.9343	12.3816	12.5409	12.3212	12.275	12.4712	12.37	12.5714
ENSRNOG00000007601	4.71355	5.34438	5.41634	5.40957	5.36942	5.43583	5.01292	4.77429	5.00331	4.71402	4.65601	5.15794	5.17937	4.74961	4.80338	5.13211	5.57014
ENSRNOG00000007603	6.23823	6.12173	7.36689	6.481	6.86214	6.79661	6.99294	6.58406	6.64155	6.34069	6.4344	6.61185	6.33929	6.59491	6.70585	6.71775	6.75341
ENSRNOG00000007604	13.2479	13.2219	13.4186	13.3905	13.2106	13.3243	13.534	13.5164	13.5822	13.4759	13.553	13.3199	13.3274	13.4639	13.2742	13.5469	13.3696
ENSRNOG00000007607	13.0564	13.6985	12.8059	13.5931	13.0766	12.9864	13.5924	13.6319	13.2089	13.655	13.0514	13.1979	12.8462	13.4532	13.2644	13.4617	13.4357
ENSRNOG00000007611	3.92116	3.98901	3.89761	4.27394	3.94016	4.45017	4.08049	3.92116	3.87231	3.81818	4.09875	3.99369	3.55198	3.70944	4.20976	4.79382	3.83638
ENSRNOG00000007613	12.9511	12.4199	12.7336	12.4046	12.6936	12.6699	12.4102	12.1132	12.8104	12.5905	12.8521	12.6281	12.6008	12.4714	12.7082	13.012	12.2442
ENSRNOG00000007624	5.29084	5.68629	5.11958	5.56405	5.71643	5.38699	5.86973	5.62768	5.50832	5.34794	5.59113	5.47911	5.55687	5.18658	5.80441	5.46605	5.55715
ENSRNOG00000007629	12.4982	12.4974	12.4675	12.5486	12.3838	12.4766	12.4242	12.2893	12.2914	12.3665	12.3908	12.456	12.3943	12.4951	12.3426	12.392	12.5032
ENSRNOG00000007640	4.20781	4.51668	4.62384	4.3358	4.31237	4.89038	5.45146	4.27622	4.57317	4.66985	4.51224	4.54242	4.45919	4.72335	4.81234	4.50365	4.37483
ENSRNOG00000007644	10.76	10.9612	10.8377	10.7361	10.9117	11.0373	11.3192	11.6697	11.203	11.4017	11.2049	10.8964	10.7475	11.0832	10.9933	11.2888	11.2421
ENSRNOG00000007645	10.0831	10.3329	9.96399	10.4949	9.53418	9.59253	10.1554	10.7248	10.4094	10.3956	10.3025	9.99452	9.73122	10.1954	10.0224	10.1999	10.6434
ENSRNOG00000007646	13.8979	14.1041	14.0345	13.8959	14.3188	14.1635	14.1734	14.406	14.2996	14.2441	14.3152	14.1003	14.1421	14.0674	14.2789	14.394	13.9192
ENSRNOG00000007647	9.19877	8.06806	8.78306	8.69135	8.36786	8.35419	7.99372	8.30265	8.15638	8.10367	8.49016	8.62743	8.66208	8.57339	8.94814	7.94856	8.04826
ENSRNOG00000007648	14.2799	14.2661	14.2624	14.3045	14.1264	14.0512	14.1094	14.193	14.2151	14.2111	14.3971	14.2329	14.2885	14.2628	14.2545	14.1436	14.1568
ENSRNOG00000007649	13.0454	12.9411	12.9956	13.0531	13.0804	13.1729	13.1775	13.2247	13.0991	13.1732	13.0129	13.0789	13.2046	13.0674	13.1494	13.0282	12.9881
ENSRNOG00000007650	14.7191	14.2054	14.4026	14.2825	14.5945	14.4801	14.3703	14.1896	14.306	14.4363	14.4884	14.4439	14.445	14.2744	14.5915	14.5304	14.2148
ENSRNOG00000007652	5.50044	6.10889	5.83424	5.70759	6.01526	5.97732	5.91589	5.73368	5.90845	5.70548	5.21186	5.79107	5.86476	5.23441	5.87668	5.52999	6.41644
ENSRNOG00000007657	11.2824	10.5627	10.5672	11.1204	11.1298	10.9031	10.9911	10.6447	10.7931	11.1041	10.5914	10.8982	11.0336	10.6559	10.8288	11.0916	10.805
ENSRNOG00000007660	11.919	11.8761	12.1256	11.8568	12.0831	12.0668	12.2172	12.1784	12.264	12.117	11.9301	11.9927	11.904	11.9927	12.1107	12.1573	12.0846
ENSRNOG00000007671	12.744	12.6593	12.6891	12.7585	12.5205	12.7456	12.6381	12.7626	12.8023	12.7782	12.8453	12.7076	12.762	12.7602	12.7292	12.794	12.5565
ENSRNOG00000007673	13.4439	13.2772	13.5276	13.3977	13.5038	13.4145	13.2925	13.1744	13.2544	13.0594	12.9545	13.3964	13.3014	13.3229	13.3784	13.1214	13.4337
ENSRNOG00000007680	4.99813	5.52827	5.44753	5.21843	5.5566	5.5116	5.40552	5.24886	5.17849	5.55598	5.15599	5.40953	5.31995	5.5657	5.53958	5.49879	4.84387
ENSRNOG00000007682	13.4823	13.746	13.77	13.7637	13.9108	13.822	13.9276	13.7569	13.4876	13.8873	13.6875	13.7286	13.7476	13.6782	13.6368	13.8061	13.8653
ENSRNOG00000007686	13.1236	13.7671	13.8101	13.5951	13.877	13.7692	13.9745	14.1403	13.826	13.8382	13.926	13.7	13.753	13.818	13.787	13.8997	13.6212
ENSRNOG00000007688	12.267	12.3366	12.3761	12.6016	12.1199	12.1836	12.3595	12.4218	12.2912	12.3117	12.2379	12.318	12.2508	12.4096	12.3167	12.2195	12.397
ENSRNOG00000007699	11.0194	10.827	10.94	10.8402	11.3782	11.5189	11.4258	11.2089	11.1354	11.1159	11.0515	11.1033	11.1907	11.1128	11.1028	11.3063	10.9339
ENSRNOG00000007700	5.38343	5.54934	5.79075	5.69963	5.70587	5.65252	5.59896	5.35271	5.67564	5.21339	5.0189	5.57552	5.34073	5.57042	5.48696	5.59898	5.60468
ENSRNOG00000007705	12.7838	12.8589	12.704	12.7202	12.7847	12.7056	13.1119	13.5031	13.2	13.5159	13.1323	12.8596	13.1386	13.0219	13.0188	12.8557	12.8888
ENSRNOG00000007706	12.3347	12.1894	12.0401	12.3061	12.2358	12.2914	12.1573	12.2377	12.2068	12.1296	12.2224	12.1895	11.8509	12.0418	12.415	12.6765	12.07
ENSRNOG00000007707	10.3552	10.4271	10.5126	10.2321	10.1103	10.3348	10.2657	10.4645	10.7732	10.3123	10.7075	10.3172	10.2537	10.3618	10.2676	10.5452	10.5601
ENSRNOG00000007725	11.5284	11.105	11.4193	11.1953	11.3328	11.3134	11.3876	11.4231	11.39	11.294	11.3547	11.3383	11.2825	11.422	11.4459	11.2356	11.3144
ENSRNOG00000007726	13.7183	13.1118	13.4804	13.239	13.6384	13.4564	13.8885	13.6975	13.4346	14.4194	13.3672	13.5371	13.9474	13.7141	13.528	13.2419	13.4715
ENSRNOG00000007727	9.79544	11.0172	9.93006	10.461	9.66964	9.89811	11.3359	10.8817	10.7887	11.5362	10.7742	10.2838	10.5725	10.6993	10.5107	10.2337	10.5894
ENSRNOG00000007730	5.21742	5.44282	5.49091	5.68036	5.17071	5.37921	5.41577	5.82186	5.53705	5.41705	6.29432	5.4426	5.79687	5.13005	5.67508	5.51188	5.49868
ENSRNOG00000007733	13.4336	13.7654	13.6923	13.5294	13.4481	13.4943	13.8478	13.9445	13.8451	13.698	13.8538	13.61	13.466	13.788	13.8726	13.6256	13.6346
ENSRNOG00000007735	10.2334	10.0304	10.0097	10.1089	9.99422	9.99237	10.2615	10.3624	10.1452	10.4799	10.2737	10.0939	9.99284	10.2749	10.2087	10.2824	10.0542
ENSRNOG00000007740	6.73223	6.26054	6.72135	7.82723	6.10911	5.54431	5.36712	6.28525	5.767	6.21047	5.65812	6.37653	6.20405	6.04156	5.94841	6.06971	6.95527
ENSRNOG00000007743	11.9159	10.6858	11.7512	11.0175	11.4227	11.4589	10.5529	10.4967	10.9348	11.0969	11.2042	11.362	11.4665	11.1997	11.3394	11.1983	10.6283
ENSRNOG00000007744	12.7061	12.952	12.9102	12.7386	13.0328	13.1285	13.221	13.2391	13.1588	13.0015	13.1183	12.9242	12.8704	13.0365	12.943	13.1951	12.9925
ENSRNOG00000007752	12.137	12.2428	12.255	12.0662	12.3306	12.3194	12.5471	11.9508	12.1085	11.98	12.0741	12.1999	11.8443	12.3162	12.2874	12.3099	12.1669
ENSRNOG00000007753	13.0226	13.0157	12.9969	13.0425	13.0292	13.0775	12.9932	12.8277	12.8373	12.9664	12.8041	13.0257	13.0126	13.0185	13.0159	12.9094	12.9043
ENSRNOG00000007756	13.0733	13.1315	13.1119	13.1853	13.2957	13.1639	13.2656	13.0092	13.058	12.947	13.0723	13.141	13.0042	13.1607	13.1422	13.2489	13.054
ENSRNOG00000007763	13.0841	12.7163	12.8828	12.5556	13.0168	12.9194	12.7541	12.684	12.7963	13.0186	12.9061	12.8764	13.0392	12.7668	12.9064	12.7905	12.7567
ENSRNOG00000007766	14.126	14.0002	14.2074	14.087	14.0493	14.0881	13.9523	13.8936	13.9198	13.9448	13.8587	14.0666	13.9022	14.1391	14.0005	14.0212	14.0278
ENSRNOG00000007769	12.2328	11.8049	12.16	11.9481	11.806	11.7533	11.5702	11.8185	11.8586	11.8258	11.9613	11.9267	11.7152	12.1153	11.8044	11.9127	11.9041
ENSRNOG00000007771	6.61947	5.95739	6.40952	6.07467	6.1345	6.08013	6.18156	5.88367	5.82602	6.03922	6.21133	6.25107	5.89675	6.87254	6.21465	6.00255	5.73114
ENSRNOG00000007775	12.2589	11.8864	12.1502	12.2641	12.0659	12.1388	12.112	11.9539	11.9739	11.9138	11.8991	12.1034	11.8939	12.0939	12.1788	12.1562	11.9861
ENSRNOG00000007778	5.65832	4.66927	5.18622	5.24946	5.41451	4.45261	4.80679	5.17834	5.11309	5.94791	5.50425	4.97781	4.82158	4.98106	4.3673	5.97907	5.71
ENSRNOG00000007781	13.2768	13.089	13.2521	13.1137	13.1896	13.324	13.2594	13.1606	13.2437	13.2724	13.1606	13.2184	13.2234	13.2431	13.2538	13.2312	13.1163
ENSRNOG00000007782	6.8381	5.33926	6.21082	5.67341	5.77309	6.01023	5.55815	5.89701	5.90376	5.51833	6.08768	5.94512	5.35589	6.36112	5.94414	6.06472	5.76513
ENSRNOG00000007788	11.7594	11.5512	11.7782	11.6482	11.9262	11.9701	12.0535	11.7643	11.7846	11.7457	11.7148	11.7563	11.6612	11.7622	11.7502	11.9524	11.8062
ENSRNOG00000007793	12.2736	12.1516	12.241	12.1087	12.1953	12.1341	12.2592	12.1948	12.2572	12.2635	12.1474	12.19	12.1497	12.2728	12.1831	12.142	12.257
ENSRNOG00000007795	8.05323	8.26753	8.06774	8.20026	8.25693	8.22251	8.10696	7.98131	7.96391	7.76073	7.78315	8.15923	8.23016	7.91833	8.21637	7.75533	8.24105
[truncated: 7,533 more rows]

## Sheet: P_NOR
Ensembl_version	F3F2P	F3F1P	F6F2P	F7M2P	F5M2P	F6M4P	F7M5P	C2F1P	C3F2P	C1F3P	C4F3P	C5M4P	C5M2P	C3M4P	C5M3P	C4M3P
ENSRNOG00000000007	14.1673	13.9624	14.0988	13.9379	13.5648	14.0372	13.7967	14.1528	14.0329	13.8971	14.6514	13.9037	14.2224	14.5001	14.9819	14.2431
ENSRNOG00000000034	10.0415	10.0966	10.2998	10.2674	10.2467	10.3678	10.5518	10.3543	10.4342	10.3965	10.4282	9.92252	10.3119	10.2016	10.6174	10.1436
ENSRNOG00000000041	8.98361	9.18425	9.57038	9.3473	9.25609	9.54722	9.54226	9.4881	9.07744	9.61312	9.35838	9.41793	9.13379	9.1022	8.95596	9.62817
ENSRNOG00000000044	13.2212	13.2293	13.2776	13.2846	13.4483	13.2566	13.2748	13.276	13.4239	13.309	13.4665	13.2874	13.222	13.4264	13.251	13.3743
ENSRNOG00000000047	14.1346	14.4444	14.581	14.5641	14.8345	14.5383	14.8515	14.5218	14.7624	14.4518	14.8731	13.6203	14.1502	14.8383	15.0002	14.455
ENSRNOG00000000048	13.475	13.4504	13.7809	13.5803	13.5518	13.6497	13.574	13.361	13.5358	13.7313	13.4707	13.5861	13.6436	13.3882	13.385	13.5425
ENSRNOG00000000053	6.17658	7.00754	7.0026	6.80415	6.38767	7.11253	7.13795	6.75507	6.53714	6.83631	7.37306	6.58491	6.80943	6.87501	7.07314	6.52663
ENSRNOG00000000060	15.3804	15.3012	15.2546	15.3287	15.2858	15.3683	15.3819	15.2591	15.4118	15.3247	15.2004	15.2792	15.3237	15.3035	15.2532	15.2231
ENSRNOG00000000064	14.9516	14.2539	14.3725	14.4622	14.6273	14.2297	14.338	14.282	14.2992	14.3259	14.2598	14.2525	14.1101	14.5749	14.5336	14.4183
ENSRNOG00000000073	9.2779	8.76828	10.1109	9.65863	10.1724	9.96133	9.66091	10.1485	10.1888	10.1256	10.2527	10.0054	10.2179	9.26321	9.92322	9.64251
ENSRNOG00000000096	10.2871	10.3146	10.5084	10.36	10.4816	10.5274	10.0411	10.8414	10.4434	10.5512	10.7566	10.8886	10.5689	10.494	10.8651	10.4916
ENSRNOG00000000105	15.1699	15.3517	15.2298	15.2713	15.2706	15.3813	15.2242	15.3404	15.2568	15.1992	15.2629	15.2417	15.1959	15.2999	15.1288	15.3177
ENSRNOG00000000108	12.2319	12.1723	12.3738	12.4382	12.606	12.442	12.8031	12.3824	12.7263	12.4333	12.349	12.0193	12.2466	12.2866	12.3043	12.3
ENSRNOG00000000109	6.44445	6.64358	6.48493	6.61909	6.26392	6.45396	7.42369	6.12781	7.00289	6.77077	6.68298	6.16244	6.45937	6.74625	6.77924	6.44355
ENSRNOG00000000121	9.57282	9.80656	10.1238	10.0419	10.2653	10.2057	10.2772	10.1538	10.3804	10.2308	10.2424	9.84987	9.61506	10.264	9.92842	10.2013
ENSRNOG00000000122	12.2215	12.3852	12.5401	12.5454	12.7295	12.7108	12.6854	12.6712	12.8822	12.7173	12.5519	11.956	12.1685	12.721	12.8944	12.6871
ENSRNOG00000000127	11.0882	11.5558	11.4178	11.2033	11.0319	11.2619	10.8643	11.1391	10.8925	11.2571	11.2193	11.4418	11.352	11.4982	11.364	10.9955
ENSRNOG00000000133	13.9552	14.0447	14.2012	14.0559	14.103	13.9642	14.0674	13.9716	14.1181	13.9454	14.2048	14.1149	13.8701	13.9349	14.3073	14.1476
ENSRNOG00000000145	12.601	13.5304	13.3014	13.1871	13.2962	13.1302	13.2633	13.5518	13.4527	13.213	13.5073	13.1235	13.3635	13.3898	13.7096	13.2807
ENSRNOG00000000155	11.1979	11.4471	11.5354	11.3985	11.4822	11.2935	11.4349	11.6393	11.402	11.5431	11.5117	11.604	11.5607	11.3634	11.6121	11.446
ENSRNOG00000000156	8.43844	8.21155	8.67221	8.40088	7.95767	8.63105	8.49437	8.5799	8.54109	8.03795	8.62068	8.26369	8.65195	8.25372	8.2878	9.03636
ENSRNOG00000000157	11.9095	11.3894	11.4315	11.511	11.2868	11.5927	11.456	11.7196	11.4725	11.5527	11.5421	11.8631	11.6119	11.6469	11.615	11.5662
ENSRNOG00000000158	13.8363	13.904	13.716	13.9323	14.4253	13.7931	13.9189	13.9289	13.8598	13.9203	13.8284	14.0926	13.7024	13.7325	13.5556	13.5724
ENSRNOG00000000161	10.9008	11.2377	11.4993	11.1745	11.0359	11.1699	11.2033	11.4196	11.3474	11.3326	10.9922	11.6553	11.6438	11.175	10.9377	11.2102
ENSRNOG00000000164	12.6125	12.8995	12.3014	12.6746	12.8928	12.4847	12.8567	12.6913	12.4993	12.2242	12.7823	12.2573	12.4519	13.0937	12.2387	12.2314
ENSRNOG00000000165	7.56235	6.78057	7.26451	6.85305	5.86091	7.321	6.32898	6.53832	7.11439	6.95647	6.4795	7.9225	6.31272	7.07062	8.05028	6.86333
ENSRNOG00000000166	10.23	10.5723	10.6819	10.5328	10.4328	10.639	10.6409	10.5494	10.4686	10.9297	10.7119	10.6699	10.5392	10.7694	10.6376	10.4512
ENSRNOG00000000167	9.52414	10.0299	11.054	10.3487	10.1562	10.8606	10.4672	10.8015	10.8175	11.5517	9.58117	10.2654	10.4597	10.4172	9.94009	11.3719
ENSRNOG00000000168	14.3779	14.5927	14.7926	14.6221	14.6316	14.6207	14.717	14.5383	14.7825	14.2911	14.5468	14.32	14.3858	14.5604	14.7598	14.4405
ENSRNOG00000000170	12.292	12.6841	12.7166	12.5063	12.2016	12.4713	12.6724	12.6014	12.6593	12.442	12.3784	12.739	12.7308	12.475	12.3537	12.6936
ENSRNOG00000000172	10.5748	10.7918	10.684	10.8036	10.5241	10.9772	11.2696	11.3038	11.0598	10.7039	10.9062	10.8317	10.9017	10.7469	11.2069	10.4696
ENSRNOG00000000177	11.2502	11.0391	11.6524	11.4656	11.6431	11.134	12.0751	11.0918	11.9058	11.2303	11.7868	10.3182	11.3265	11.8985	11.9	11.0508
ENSRNOG00000000185	12.1043	11.1588	11.2557	11.5132	11.4554	11.2651	11.8398	11.1621	11.4677	11.2808	11.2937	11.1852	10.9438	11.5081	11.3762	11.4455
ENSRNOG00000000186	13.2793	12.1418	12.4475	12.6115	12.746	12.5796	12.4749	12.4889	12.4645	12.2989	12.6755	12.1863	12.0072	12.6224	12.908	12.7623
ENSRNOG00000000187	8.7756	8.10166	7.84513	8.58438	8.73963	9.06259	8.98167	8.73724	8.55594	9.08579	7.93957	7.27281	8.35398	8.52137	7.28528	9.14553
ENSRNOG00000000195	8.79632	9.10236	8.46979	8.84923	8.69153	8.86805	9.16733	9.52492	8.78522	8.91415	8.90344	9.27337	9.01031	8.66937	8.83012	8.97326
ENSRNOG00000000201	6.79197	6.71746	6.10803	6.55354	6.39021	6.76464	6.54891	7.20271	6.18752	6.09217	6.06372	7.08844	6.67404	6.02476	5.9131	6.13521
ENSRNOG00000000204	11.5316	11.9787	11.8929	11.8369	11.7395	12.0789	11.8001	11.9053	11.7743	11.7346	12.0766	11.977	12.1341	11.6731	11.8013	11.5361
ENSRNOG00000000221	11.0523	11.0728	11.1968	11.1739	11.1123	11.0519	11.5571	11.3748	11.2494	11.3279	11.24	10.9253	11.3496	11.3114	11.0057	11.4487
ENSRNOG00000000233	8.37418	7.98484	8.19624	8.15237	8.57221	7.65731	8.12946	7.84336	7.8857	8.86335	8.46951	8.93523	8.27312	8.31034	8.09767	7.93186
ENSRNOG00000000236	12.9723	12.6909	12.6699	12.697	12.5826	12.5462	12.72	13.0011	12.4647	12.6234	12.6543	12.7712	13.0104	12.7245	12.7624	12.7056
ENSRNOG00000000239	7.55745	7.30684	6.683	7.14094	6.88307	6.97046	7.44482	6.66138	7.60536	7.04378	7.41006	7.26621	7.46875	6.73582	7.1789	7.53108
ENSRNOG00000000244	10.6472	10.7511	10.5344	10.5577	10.4188	10.4754	10.519	10.8358	10.3612	10.7355	10.4546	11.1228	10.7865	10.4895	10.6813	10.4882
ENSRNOG00000000245	9.7009	10.419	10.1618	10.1791	9.97737	9.8149	11.0007	10.2295	10.1842	10.048	10.0601	9.909	10.3474	10.0189	9.73479	10.067
ENSRNOG00000000246	12.5633	13.0026	13.0595	12.83	12.9057	12.8779	12.5712	13.0809	12.7928	12.8736	12.9601	13.237	13.0964	12.8586	12.8573	12.8894
ENSRNOG00000000248	13.8368	12.7394	12.9768	13.1339	13.3731	12.824	13.0532	12.9727	12.9122	12.7692	13.2165	12.8857	12.7932	13.2824	13.093	13.1246
ENSRNOG00000000249	10.7753	10.4597	10.6205	10.6379	10.9206	10.553	10.4983	10.4739	10.5159	10.68	10.6714	10.7134	10.5409	10.5575	10.315	10.6686
ENSRNOG00000000250	11.4885	11.0303	11.1865	11.1696	11.004	11.0458	11.2625	11.3157	10.8777	11.4419	11.1858	11.2663	11.1863	11.2297	11.505	11.2813
ENSRNOG00000000257	13.2613	13.0511	12.9059	12.8334	12.9167	12.5951	12.2703	13.0585	12.7272	12.4009	13.7475	12.6257	13.3246	13.8576	13.2745	13.4511
ENSRNOG00000000258	12.0584	11.737	11.901	11.863	11.8662	11.8349	11.7803	11.8802	11.7658	11.9542	11.6204	12.1547	11.9221	11.6808	11.6062	11.9037
ENSRNOG00000000264	12.1587	12.1646	11.9875	12.0285	12.1871	11.6679	12.0052	12.1615	11.9129	12.0254	12.0705	12.2736	12.1686	12.0544	12.1025	12.1208
ENSRNOG00000000274	14.7559	14.9202	15.0754	15.0192	15.0145	15.2097	15.1395	15.1797	15.2923	15.2504	15.1972	15.0502	15.0076	15.104	15.2097	15.0894
ENSRNOG00000000283	12.1493	12.283	12.5108	12.3078	12.1787	12.423	12.3023	12.3558	12.3866	12.4191	12.192	12.499	12.3094	12.2905	12.2811	12.3556
ENSRNOG00000000303	9.42137	9.49097	9.54151	9.48539	9.34918	9.46494	9.64436	9.98122	9.55106	9.64172	9.62796	10.014	9.65951	9.54598	9.6689	9.60885
ENSRNOG00000000304	12.8486	12.7043	12.7466	12.8614	13.021	12.8039	13.0439	12.9116	12.9747	12.8365	12.8763	12.563	12.9141	12.7942	12.7093	12.878
ENSRNOG00000000306	10.944	10.6027	10.7561	11.0655	12.6197	10.6799	10.7905	11.0804	10.7432	11.1915	11.0563	10.7515	10.4039	10.4012	10.8503	10.6715
ENSRNOG00000000312	13.4481	13.7348	13.4336	13.5108	13.4711	13.4342	13.5431	13.9025	13.6187	13.4225	13.5925	13.7719	13.8999	13.4952	13.6022	13.5902
ENSRNOG00000000321	13.3973	13.197	13.6031	13.58	13.7909	13.7121	13.7797	13.4126	13.4862	14.025	13.7572	13.5624	13.308	13.6907	13.0152	13.5541
ENSRNOG00000000322	11.5938	11.7828	11.7069	11.7547	11.7354	11.7685	11.9409	11.8857	11.8873	11.9336	11.7686	11.8199	11.6382	11.867	11.867	11.7454
ENSRNOG00000000340	12.3681	12.0065	11.5959	11.7927	11.6678	11.5981	11.5195	12.2291	11.5646	11.2096	11.4253	12.4686	12.492	11.5015	11.4969	11.4102
ENSRNOG00000000368	11.3467	11.5973	11.2762	11.3576	11.6669	11.2596	10.9993	11.7254	11.2759	11.6334	11.9908	11.4355	11.5267	12.1548	11.8176	11.6783
ENSRNOG00000000386	11.4305	11.2639	11.6575	11.5062	11.8118	11.2618	11.6118	11.5689	12.0062	11.2886	11.8137	11.0498	11.8716	12.1215	11.9911	10.9376
ENSRNOG00000000392	11.9673	12.5682	12.79	12.5881	12.7351	12.8076	12.6605	12.8958	12.8516	12.7191	12.8375	12.6941	12.6972	12.4656	12.7377	12.548
ENSRNOG00000000394	12.3897	12.7712	12.6715	12.6396	12.2097	13.051	12.7447	12.8189	12.9369	12.4748	12.7578	12.3408	12.9114	12.4218	12.9697	12.897
ENSRNOG00000000395	14.407	14.6265	14.5906	14.5697	14.8475	14.3922	14.5547	14.6664	14.5863	14.8209	14.6027	14.6694	14.6714	14.6245	14.5037	14.6849
ENSRNOG00000000398	11.089	11.3469	11.1939	11.2036	11.1543	11.2406	11.1969	11.6859	11.1369	11.3083	11.0522	11.6788	11.4167	11.0072	11.3296	11.0898
ENSRNOG00000000406	6.68978	6.33712	6.44437	6.62808	6.31725	6.95242	7.02753	6.89841	6.52399	7.33326	6.91807	6.77199	6.54457	6.42601	6.47428	7.44618
ENSRNOG00000000413	7.67298	8.22089	8.4035	8.236	7.96167	8.08786	9.06909	8.97454	7.79787	8.60391	7.61772	7.98679	9.0718	8.06057	7.64485	7.55464
ENSRNOG00000000420	12.6924	12.3408	12.7401	12.6855	12.879	12.6739	12.7865	12.515	12.4763	12.9683	12.7756	12.4382	12.4881	12.5789	12.6083	12.6687
ENSRNOG00000000421	12.3374	12.0392	12.2496	12.2275	12.1599	12.3456	12.2334	12.2025	11.9848	12.2132	12.0589	12.3022	12.0511	12.1037	11.9861	12.0043
ENSRNOG00000000422	11.5792	11.6006	11.5896	11.6749	11.8148	11.6765	11.7887	11.5414	11.6822	11.803	12.0652	11.4256	11.3498	11.7453	11.7911	11.9789
ENSRNOG00000000428	5.71843	5.799	6.80829	6.21279	6.01407	6.46012	6.47682	5.70423	6.17884	6.06055	6.72172	5.96149	5.81885	6.40306	6.3326	5.61223
ENSRNOG00000000431	13.9673	13.8121	13.9983	13.9652	14.105	14.0057	13.9027	13.912	13.7487	13.963	13.8178	13.8099	13.7988	13.9063	13.6796	13.8423
ENSRNOG00000000432	11.1164	11.2582	11.6256	11.4662	11.7105	11.4091	11.6772	11.2841	11.0747	11.9334	11.382	11.3273	11.2383	11.2054	11.042	11.3834
ENSRNOG00000000435	13.2657	13.4527	13.4767	13.4669	13.5903	13.4571	13.5589	13.4512	13.5729	13.6011	13.6567	12.9421	13.269	13.8172	13.7386	13.6229
ENSRNOG00000000436	9.02938	8.4645	8.36221	8.83545	8.65633	9.09036	9.40993	8.9553	8.89553	8.50694	8.58096	8.3811	7.85738	8.63416	8.40691	8.93075
ENSRNOG00000000437	14.6628	14.1369	14.2108	14.3205	14.3066	14.3813	14.2245	14.1032	14.2054	14.284	14.2976	14.1909	14.1885	14.4019	14.0535	14.3883
ENSRNOG00000000439	9.29137	8.94294	9.49502	9.41755	9.72203	9.70528	9.34867	9.0348	9.64589	9.73116	9.19915	8.9895	8.35183	9.07467	9.5627	9.85757
ENSRNOG00000000440	12.8582	13.3448	13.5978	13.3883	13.7402	13.5362	13.2526	13.3357	13.6215	13.6862	13.5851	13.0018	13.2473	13.6266	13.6002	13.4903
ENSRNOG00000000441	10.3711	10.12	10.6456	10.6535	10.592	10.9931	11.1989	10.6851	11.1217	10.9832	10.7458	9.74616	10.1985	10.9901	10.4325	11.1994
ENSRNOG00000000442	8.98225	8.3349	8.36647	8.58149	8.58884	8.58406	8.63243	8.21582	8.46732	8.89695	8.29916	8.17149	7.92056	8.5743	9.005	8.54081
ENSRNOG00000000451	7.18297	6.16912	6.97285	7.53739	6.9989	8.71599	9.1845	8.12154	8.41758	9.72732	7.30078	6.75609	6.22827	7.66766	6.93099	9.22976
ENSRNOG00000000454	6.35861	6.98824	6.89978	6.6426	6.52705	6.98175	6.10016	6.85045	7.52172	6.62751	6.64386	7.54924	6.87972	7.89677	5.92859	7.01748
ENSRNOG00000000455	9.92635	9.82921	9.84723	10.08	10.238	10.2437	10.3956	10.0536	10.0787	10.307	9.72642	9.70276	9.78039	9.64675	9.71333	9.93009
ENSRNOG00000000456	10.5374	10.2033	10.6097	10.6772	10.6086	10.9755	11.1289	10.5021	10.8713	10.9185	10.7119	9.79994	10.0842	10.3395	10.7612	11.237
ENSRNOG00000000457	10.3189	10.2922	10.2991	10.5559	10.6902	10.6055	11.1297	10.4227	10.7198	10.8472	10.3372	9.76179	10.0422	10.3797	10.1072	10.9132
ENSRNOG00000000459	9.26169	8.56131	8.90572	9.07245	9.20995	8.8927	9.60336	8.86859	8.96583	9.40274	8.68471	8.34009	8.48334	8.62317	9.07816	9.27812
ENSRNOG00000000461	14.1948	14.4149	14.3524	14.3837	14.5358	14.3745	14.4299	14.2834	14.6075	14.3456	14.4159	14.193	14.1956	14.3036	14.5124	14.4355
ENSRNOG00000000464	13.6184	13.7231	13.8999	13.7864	13.8038	13.8163	13.8565	13.6542	13.8838	13.9808	13.8652	13.5233	13.5308	14.1545	13.8742	13.8826
ENSRNOG00000000465	13.4528	13.1339	13.3705	13.3915	13.5318	13.344	13.5161	13.2245	13.2955	13.3732	13.2544	13.0906	13.2242	13.2453	13.1426	13.2426
ENSRNOG00000000466	12.959	12.7575	12.6471	12.838	13.1133	12.699	12.8522	12.9681	12.8189	12.8085	13.0259	12.5461	12.6949	12.8962	12.9749	13.076
ENSRNOG00000000467	13.4424	13.5176	13.419	13.4223	13.5371	13.5715	13.0463	13.4584	13.4276	13.419	13.5243	13.4801	13.4907	13.5994	13.4582	13.5104
ENSRNOG00000000470	13.3838	13.7122	13.3396	13.3599	13.2484	13.4367	13.0384	13.7721	13.6799	13.3804	13.2896	14.0172	14.0191	13.5426	13.7825	13.0924
ENSRNOG00000000471	9.80853	9.25663	10.0731	9.80383	10.2337	9.52166	9.92934	9.69003	9.65266	9.70976	10.0259	9.84208	9.33173	9.7248	9.55212	9.78247
ENSRNOG00000000473	14.8898	14.543	14.7063	14.7274	14.8691	14.5248	14.8312	14.601	14.6376	14.7063	14.5813	14.8086	14.5021	14.6659	14.4257	14.659
ENSRNOG00000000474	12.6621	12.9911	12.7563	12.9012	13.0216	13.0314	12.9444	12.8298	12.972	12.9182	12.8447	12.3701	12.5427	12.9032	12.9799	12.9983
ENSRNOG00000000476	12.6345	12.3606	12.2052	12.3759	12.259	12.3368	12.4591	12.3653	12.2945	12.3988	12.1115	12.5914	12.4295	12.1633	12.0257	12.4162
ENSRNOG00000000477	12.4401	12.0547	12.2708	12.2423	12.1726	12.0969	12.4185	12.3036	12.0374	12.1037	12.1562	12.3143	12.1324	12.033	12.1562	12.2026
ENSRNOG00000000479	9.36615	8.75239	9.00245	9.00422	8.67794	9.04501	9.18139	8.87474	8.68397	9.13037	9.45074	9.10759	8.69244	9.87207	8.76383	8.98258
ENSRNOG00000000480	11.8793	12.0878	10.8834	11.2542	11.298	11.0707	10.3059	10.5765	10.4004	10.46	11.6221	11.7886	11.4117	12.4357	10.7298	9.90571
ENSRNOG00000000481	13.8144	13.2054	13.4233	13.4479	13.4149	13.419	13.4105	13.2708	13.3866	13.2548	13.3853	13.241	13.1439	13.5276	13.4248	13.5082
ENSRNOG00000000483	14.3706	14.0939	12.3107	13.0554	12.6885	13.29	11.5787	12.1007	12.161	12.1381	13.112	14.174	13.3542	13.9973	11.6565	12.3279
ENSRNOG00000000485	10.7083	10.9158	10.9516	10.9515	10.875	11.1137	11.1446	11.0693	10.8688	10.9524	10.9976	10.6397	10.5994	10.9861	10.9154	11.0921
ENSRNOG00000000486	7.89102	7.57666	7.25267	7.54254	7.54732	7.5695	7.41806	7.84859	7.07398	7.39819	7.34978	7.98567	7.24546	7.32751	7.24051	7.4977
ENSRNOG00000000487	12.3358	12.0625	12.3938	12.1089	12.1143	11.7107	12.0363	12.3225	12.1339	11.704	12.7269	11.7834	12.1091	12.8685	12.7864	12.609
ENSRNOG00000000488	13.0303	12.9244	12.8295	12.8859	12.5728	13.253	12.7054	12.8398	12.8696	13.0911	13.0454	13.1188	12.9083	13.0313	12.9411	13.0922
ENSRNOG00000000490	14.6844	14.1986	14.6544	14.5311	14.5355	14.4433	14.6707	14.2213	14.4037	14.5609	14.6458	14.26	14.2201	14.4712	14.5027	14.7095
ENSRNOG00000000499	6.47686	6.79388	6.61733	6.68934	6.8785	6.96078	6.40869	6.23465	7.0483	6.80181	6.99657	6.53986	6.22921	7.18605	6.73751	6.75412
ENSRNOG00000000503	11.2926	11.547	11.1743	11.1964	10.7511	11.6216	10.792	10.8	11.3448	11.1226	10.95	11.7353	11.0244	11.8483	10.2463	11.3728
ENSRNOG00000000505	14.5672	14.2225	14.5407	14.4823	14.5284	14.4701	14.5651	14.3309	14.439	14.4928	14.3915	14.2563	14.1703	14.4977	14.3739	14.5072
ENSRNOG00000000506	8.40033	7.99448	7.90261	8.25105	8.18912	8.31309	8.7067	8.56279	7.88586	8.6249	8.10023	8.29444	8.01493	8.27386	7.98849	7.8701
ENSRNOG00000000510	6.30171	7.12869	6.0311	6.57369	6.49397	6.84196	6.64471	7.00609	6.38032	7.03628	6.69931	6.97492	6.98504	6.52764	6.29657	6.53431
ENSRNOG00000000511	13.8632	14.0064	13.5869	13.6715	13.4123	13.7775	13.3829	14.0891	13.6236	13.6495	13.6777	14.2605	14.2665	13.7093	13.7332	13.8245
ENSRNOG00000000513	12.9806	13.3559	13.3848	13.2869	13.4605	13.2753	13.2644	13.3077	13.2215	13.5341	13.5472	13.0245	13.2113	13.427	13.4634	13.5731
ENSRNOG00000000515	6.43467	6.49423	6.1666	6.44117	5.79514	6.24252	7.51384	6.98437	6.19459	6.14171	6.44906	6.65593	6.85911	6.08113	6.00275	6.10025
ENSRNOG00000000519	11.6413	12.1488	11.6313	11.9149	11.9586	12.075	12.0346	12.1299	12.0204	12.0716	11.8256	11.4519	11.7053	11.9586	12.2866	11.9294
ENSRNOG00000000520	14.7816	14.6058	14.5672	14.6099	14.7237	14.5084	14.4728	14.5572	14.5466	14.4844	14.6244	14.6896	14.6603	14.6114	14.5871	14.4984
ENSRNOG00000000521	12.3822	11.9203	8.86298	10.8399	10.2348	10.7304	10.9087	11.631	10.7245	9.61292	9.27054	11.0118	11.8517	10.4762	11.156	8.50604
ENSRNOG00000000523	11.0213	10.3865	10.7193	10.7242	10.5726	10.7771	10.8682	10.6664	10.5918	10.8345	10.8388	10.8216	10.4327	10.6626	10.6685	10.977
ENSRNOG00000000524	13.5571	13.4442	13.6953	13.5933	13.8197	13.54	13.5035	13.6185	13.5879	13.6442	13.6901	13.6123	13.6079	13.6093	13.4893	13.6697
ENSRNOG00000000529	8.54131	7.64283	8.06685	7.92169	7.97598	7.51732	7.78586	8.13687	7.79817	8.44253	8.59365	9.48745	8.22415	8.62294	7.37952	8.59327
ENSRNOG00000000532	13.608	13.3602	13.4037	13.432	13.6021	13.3	13.3178	13.4642	13.3753	13.3932	13.3424	13.5743	13.5487	13.3552	13.4168	13.2449
ENSRNOG00000000540	12.5447	12.734	13.1938	12.9766	13.3145	12.9646	13.1077	12.8141	13.081	13.3336	13.0565	12.8815	12.7015	12.8639	12.6939	13.1872
ENSRNOG00000000541	14.1893	14.0248	14.5011	14.266	14.4662	14.288	14.1266	14.2731	14.1794	14.183	14.0588	14.3766	14.1725	14.0295	14.173	13.9301
ENSRNOG00000000543	7.15326	6.97832	7.03749	7.15872	7.06945	7.10106	7.61277	7.0544	7.11841	7.34515	7.02645	7.07134	6.71354	7.13481	6.87776	7.19207
ENSRNOG00000000547	15.1142	15.0021	15.3458	15.1792	15.3568	15.0598	15.1963	15.0875	15.3233	15.077	15.0861	15.226	14.9975	15.1675	15.0337	15.1229
ENSRNOG00000000549	14.3658	14.4074	14.6254	14.5012	14.6239	14.4707	14.5143	14.5662	14.5611	14.4797	14.7295	14.5284	14.5766	14.5917	14.4993	14.4881
ENSRNOG00000000557	14.099	14.2117	14.393	14.254	14.3628	14.3547	14.1029	14.2666	14.3225	14.425	14.5283	14.3441	14.2749	14.3193	14.3214	14.5371
ENSRNOG00000000559	5.57911	6.28975	6.32728	6.28917	6.33614	6.64947	6.55331	5.87546	6.47492	6.48716	7.92143	6.04582	5.93101	6.62999	6.90974	6.42153
ENSRNOG00000000562	7.03095	7.32966	7.39105	7.22208	7.55756	6.78152	7.24175	7.24539	8.01569	7.261	7.29347	7.56582	7.41248	7.35763	7.21475	7.91094
ENSRNOG00000000565	11.3226	11.7209	11.4615	11.5374	11.5246	11.8869	11.3079	11.8204	11.5081	11.4837	11.5562	11.6273	11.5882	11.4745	11.6296	11.3997
ENSRNOG00000000566	10.9799	10.552	10.6429	10.8225	11.4264	10.7522	10.5814	10.7713	10.361	11.4682	11.6813	11.1879	10.5766	10.416	11.9102	10.603
ENSRNOG00000000567	13.2768	13.3192	13.495	13.3983	13.5859	13.2027	13.5104	13.1219	13.5775	12.9486	13.6307	12.5366	13.3058	13.6196	13.6859	13.2163
ENSRNOG00000000568	11.957	11.8648	11.2683	11.7312	11.8337	11.6078	11.8555	11.8328	11.4289	11.3582	11.5393	11.0602	11.654	11.7009	11.417	11.6342
ENSRNOG00000000569	12.4716	12.5335	11.6284	12.3481	12.6692	12.2693	12.5169	12.4982	11.769	12.2163	11.9108	11.2148	11.9268	12.1586	11.7829	12.4851
ENSRNOG00000000571	15.523	15.3643	15.5136	15.4529	15.3979	15.4134	15.5053	15.313	15.3815	15.4203	15.312	15.2747	15.2899	15.4805	15.426	15.4069
ENSRNOG00000000572	8.07048	8.6282	8.29824	8.14226	8.37767	7.89162	7.58733	7.84494	8.01543	7.70792	7.80792	8.11508	8.17695	9.01422	7.35346	7.84337
ENSRNOG00000000585	13.645	13.922	13.9054	13.8575	13.9985	13.7934	13.8804	14.0997	13.8452	13.906	13.79	13.9966	13.957	13.75	13.8315	13.7912
ENSRNOG00000000588	8.21711	8.31979	8.69975	8.43264	8.86481	8.45646	8.03795	8.59617	8.73353	8.25162	8.92549	7.80297	8.93932	9.35785	8.73273	8.16276
ENSRNOG00000000590	6.84487	7.44363	6.99614	7.27135	7.17518	6.91216	8.25614	7.42574	7.79625	7.56474	7.49119	6.88804	7.19762	7.28409	7.82352	7.46294
ENSRNOG00000000593	11.8902	11.9815	12.1787	12.0794	12.5352	12	11.8909	12.2921	11.9339	12.3362	12.0566	12.0552	11.8847	12.0028	12.323	12.0851
ENSRNOG00000000595	9.385	9.92222	9.87886	9.87646	10.2441	9.64499	10.1836	10.0205	9.95269	10.2578	9.83284	10.0155	9.52565	9.36037	10.2274	9.95339
ENSRNOG00000000596	14.6114	14.7747	14.6496	14.6574	14.7442	14.4949	14.6697	14.7032	14.6452	14.6391	14.5081	14.7341	14.8798	14.5271	14.5266	14.5947
ENSRNOG00000000609	11.7541	11.6551	11.5851	11.6636	11.6626	11.7988	11.526	11.8631	11.7143	11.8599	11.9492	11.9153	11.7446	11.8328	11.9382	11.81
ENSRNOG00000000613	11.7617	12.284	12.3497	12.228	12.2074	12.4012	12.364	12.4123	12.478	12.4249	12.4226	12.0996	12.1756	12.3322	12.6044	12.311
ENSRNOG00000000618	10.8331	11.0312	11.5556	11.1735	11.0767	11.3386	11.206	11.1987	11.4212	11.3459	11.7009	11.2885	11.1765	11.3954	11.6941	11.3025
ENSRNOG00000000632	8.72554	6.92372	7.48094	7.50166	7.00623	7.80892	7.06461	6.99401	7.11875	7.73801	7.87557	7.55762	7.23737	8.49178	7.74748	7.53042
ENSRNOG00000000638	13.8612	13.8255	14.4975	14.1474	13.8771	14.5732	14.2497	14.597	14.6152	14.3004	14.2794	14.5986	14.6185	14.3219	13.6686	14.4521
ENSRNOG00000000640	13.3485	12.7091	11.4438	12.1515	9.77684	12.9346	12.6959	12.6849	11.124	13.2588	12.3249	12.6113	13.8265	13.4751	12.241	11.9427
ENSRNOG00000000641	12.2863	12.1236	12.182	12.1102	12.1256	11.8454	12.0985	12.0545	12.1107	11.9216	11.9559	12.2956	12.263	12.2673	11.9571	11.8582
ENSRNOG00000000653	6.78986	6.98819	6.9572	6.98468	7.50365	6.67869	6.99046	6.68588	7.77421	6.76035	6.84852	7.34573	6.75432	6.58353	7.37658	6.53377
ENSRNOG00000000658	10.2096	9.47053	9.45567	9.73059	9.88343	9.62279	9.74146	9.53656	9.66367	9.90999	9.53516	9.8322	9.06343	9.38503	10.1704	9.72981
ENSRNOG00000000663	12.6136	12.2182	12.3727	12.4184	12.3373	12.358	12.6109	12.3278	12.3489	12.5019	12.6145	12.2604	12.097	12.6015	12.5338	12.6344
ENSRNOG00000000664	11.842	10.9592	11.4085	11.3961	11.2444	11.252	11.6707	11.0031	11.0994	11.2905	11.2508	11.0445	10.9155	11.4376	11.2483	11.2069
ENSRNOG00000000665	12.57	12.7279	12.873	12.7781	12.7135	13.0565	12.7277	12.9031	12.8752	12.8787	12.8172	12.7956	12.7905	12.6973	12.9069	12.7849
ENSRNOG00000000692	9.4464	9.19233	9.78948	9.63263	9.5179	9.7696	10.0801	8.99866	10.0262	9.87454	9.78365	9.33686	8.98323	9.46766	9.80316	9.70614
ENSRNOG00000000693	14.6775	14.5089	14.5601	14.5428	14.395	14.5589	14.5562	14.5037	14.3708	14.7026	14.3062	14.8129	14.6195	14.462	14.3872	14.3385
ENSRNOG00000000699	13.3764	13.7606	12.8218	13.4134	12.9864	14.4947	13.0402	13.6576	13.4325	13.3677	13.7365	12.0497	13.0454	15.3193	11.9791	14.7166
ENSRNOG00000000704	8.96187	8.92987	8.94455	9.286	9.95209	9.42448	9.50317	9.32044	9.3848	9.75636	10.1081	8.92742	8.73761	9.58045	8.51569	10.1521
ENSRNOG00000000715	6.95096	6.22244	7.0647	6.7008	6.66959	6.28184	7.01527	6.13246	6.68489	6.22612	7.45542	6.77413	6.39442	7.19199	6.49346	6.57496
ENSRNOG00000000716	8.20843	8.17421	8.65092	8.08472	7.61626	7.62605	8.23243	8.71983	8.25054	7.90732	8.35616	8.38499	8.71722	9.06964	8.65646	8.46766
ENSRNOG00000000720	11.0092	10.6978	10.9172	10.8522	10.8101	10.6747	11.0045	10.8853	10.6826	10.9162	10.8397	11.0096	10.9238	10.756	10.9153	10.7018
ENSRNOG00000000723	8.72096	8.85393	8.60374	9.0289	8.99522	9.32495	9.67459	8.47679	9.72537	8.92982	9.04321	8.02027	8.51883	9.43413	8.37311	8.82948
ENSRNOG00000000726	6.08855	5.9655	6.1595	5.89746	5.81196	5.84814	5.51111	5.59916	6.1994	5.75239	5.82675	6.49339	5.92459	5.8476	6.04112	6.08804
ENSRNOG00000000728	7.92998	6.76234	7.79801	7.70398	8.21048	7.45399	8.06907	8.0538	7.49092	8.5343	7.8643	8.2818	6.96256	7.57393	7.86507	7.84717
ENSRNOG00000000729	10.1606	10.1456	10.4024	10.2639	10.1244	10.2559	10.4948	10.5442	10.0908	10.206	10.0467	10.2296	10.0472	10.1802	10.1857	10.2796
ENSRNOG00000000746	7.38659	6.69485	7.16594	7.00006	6.83729	7.5098	6.40589	7.02476	6.81489	6.77558	6.68172	6.9438	6.84845	6.24983	6.54232	8.09297
ENSRNOG00000000747	7.07447	6.10573	6.06358	6.50868	6.23592	6.89805	6.67435	6.29188	6.38431	6.99428	7.78448	7.08805	5.96981	6.29903	6.94377	7.38293
ENSRNOG00000000749	6.26547	6.96184	6.81302	6.52091	6.52467	6.35883	6.20165	6.52859	6.29161	6.086	6.43645	6.51968	6.61654	6.48043	6.97686	6.15938
ENSRNOG00000000759	5.44597	5.90493	6.44635	5.9927	6.04339	5.51243	6.60314	6.3676	5.47863	5.6887	6.06115	6.07543	5.81947	5.61984	5.62704	5.94641
ENSRNOG00000000763	11.8286	11.9553	12.0593	11.9944	11.9483	11.8675	12.3073	11.9169	11.8465	12.4487	11.723	12.1135	11.9138	11.6963	11.9994	11.8809
ENSRNOG00000000765	7.68555	8.28808	7.58822	7.65767	7.73972	7.53402	7.11044	7.23104	7.68587	6.9245	6.92924	7.19269	7.77933	7.46137	8.05645	6.79835
ENSRNOG00000000768	6.28641	6.34829	6.32989	6.5739	6.74889	6.59573	7.13419	6.9344	7.04212	6.58264	7.04088	6.10173	5.86462	6.8643	6.80486	7.16103
ENSRNOG00000000774	14.1132	14.5782	14.0796	14.1937	14.5801	13.7712	14.0401	13.9593	13.8514	14.0888	14.0913	13.86	14.1044	14.1989	14.1446	14.1078
ENSRNOG00000000775	14.3854	14.3631	14.1518	14.2901	14.5356	13.8307	14.4739	14.3085	14.4952	13.7995	14.3638	13.4938	14.6122	14.7044	14.5434	13.9225
ENSRNOG00000000777	12.3499	11.8982	11.4753	11.7557	11.1247	11.806	11.88	11.4759	11.954	11.9555	11.4703	11.877	12.3647	11.6901	11.6073	12.0571
ENSRNOG00000000779	10.9181	10.609	10.8447	10.8376	10.777	10.9095	10.9674	10.7723	10.8147	10.9744	10.6586	10.7039	10.6703	10.6902	10.8888	10.7543
ENSRNOG00000000780	15.003	15.1309	14.966	15.0566	15.0382	15.0914	15.1103	15.243	15.0976	15.0498	15.0737	14.8979	15.4244	14.9963	15.0506	15.0535
ENSRNOG00000000781	11.9763	11.2614	11.0729	11.5553	11.6259	11.6535	11.742	11.0346	11.0888	12.0189	10.5254	11.8023	11.5626	11.1878	9.61241	10.8699
ENSRNOG00000000782	7.84264	7.51648	6.91659	7.23144	7.10286	6.38303	7.627	7.10082	6.70589	7.23053	8.146	7.6329	7.43984	7.24792	7.41786	8.04872
ENSRNOG00000000783	7.8934	8.69426	8.15575	8.24854	8.09918	8.76779	7.88088	8.32001	9.02287	7.94037	8.4505	9.15606	8.95231	7.77899	8.59052	7.68431
ENSRNOG00000000785	11.9394	12.1572	12.0718	12.104	12.1819	12.2765	11.9969	12.0862	12.0745	12.0053	12.3119	11.9066	11.8084	12.2234	12.1657	12.1704
ENSRNOG00000000786	11.2114	10.3404	10.5359	10.6374	10.6606	10.3605	10.7156	10.4357	10.486	10.5631	10.2863	10.6568	10.4178	10.605	10.4195	10.5097
ENSRNOG00000000795	7.5674	7.25179	7.9055	7.86709	8.30414	7.87745	8.29628	7.84303	7.41368	7.74732	8.20661	7.883	7.24611	7.35178	6.7999	7.76018
ENSRNOG00000000798	14.1925	14.0621	14.2221	14.1833	14.0407	14.1735	14.4086	14.1055	14.1038	14.3729	14.3085	14.0711	13.9332	14.3949	14.246	14.3039
ENSRNOG00000000800	11.9408	11.5129	11.5617	11.6654	11.4526	11.5874	11.9368	11.9904	11.3784	12.1014	13.2587	11.9484	11.7213	12.9201	11.9595	12.4054
ENSRNOG00000000801	10.5989	9.75516	10.4278	10.1272	10.0645	9.9564	9.96039	10.1854	9.66131	10.1592	10.1584	10.5058	10.2304	10.0949	10.1476	10.1276
ENSRNOG00000000804	12.9553	12.6315	12.8903	12.8555	12.8982	12.7603	12.9972	13.0137	12.9326	12.8318	12.8178	13.01	12.9392	12.8309	12.6693	12.8445
ENSRNOG00000000805	15.3854	15.5384	15.57	15.5056	15.6051	15.4603	15.4746	15.57	15.5935	15.4849	15.5597	15.6684	15.3698	15.5192	15.5039	15.6468
ENSRNOG00000000808	10.7503	10.3309	10.4413	10.5024	10.7042	10.2481	10.5395	10.8234	10.4698	10.6775	10.6744	10.7743	10.7917	10.547	10.6076	10.6204
ENSRNOG00000000809	13.9129	13.9032	13.5284	13.7189	13.899	13.709	13.3608	14.0327	13.6049	13.777	13.8754	14.1054	13.9847	13.6978	13.9545	13.7928
ENSRNOG00000000811	8.53075	7.882	8.76087	8.64573	9.56009	8.60393	8.53674	8.45458	8.48838	9.2145	8.65483	8.56636	8.00772	8.07812	8.29443	8.85071
ENSRNOG00000000812	13.364	13.3749	13.6515	13.4199	13.5388	13.2908	13.2997	13.2765	13.2521	13.1782	13.451	13.1844	13.0583	13.4064	13.6761	13.4158
ENSRNOG00000000814	14.2607	13.7727	13.8305	14.0315	14.4461	14.1863	13.6924	13.9898	14.0887	13.9769	14.3098	13.9695	13.8093	14.1772	14.2129	13.7692
ENSRNOG00000000815	11.181	11.4481	11.1815	11.4141	11.3907	11.5172	11.7663	11.3524	11.3587	11.5656	11.2518	11.0381	11.1516	11.4969	10.8009	11.4517
ENSRNOG00000000818	8.53011	8.14837	8.70687	8.45414	8.19641	8.3737	8.76939	8.25692	8.70137	8.40537	8.21318	9.00725	8.49101	8.07022	7.86144	8.59273
ENSRNOG00000000825	8.09981	8.31547	7.4798	7.90983	7.89984	7.78275	7.88129	8.47011	7.33342	7.55099	7.45566	8.05926	7.98907	7.62485	7.65322	7.55893
ENSRNOG00000000826	14.4261	14.079	14.1068	14.1941	14.207	14.1359	14.2097	14.0209	14.0483	14.3275	13.977	14.3477	14.1342	14.0275	13.999	14.0252
ENSRNOG00000000827	11.0043	10.3304	10.5437	10.7044	10.0261	10.6505	11.6712	10.7101	11.282	10.5701	10.1139	10.3245	10.0905	10.2996	10.6553	11.4474
ENSRNOG00000000831	11.7298	11.6533	11.9743	11.8572	12.0696	11.8292	11.8873	11.9311	11.8342	12.1939	11.9428	12.025	11.8381	11.7566	11.8839	11.8916
ENSRNOG00000000833	10.338	9.64439	9.95485	10.0027	10.1258	9.94193	10.0113	10.0065	9.95703	10.0697	9.88897	10.1824	9.80995	9.95289	9.93255	9.86541
ENSRNOG00000000838	7.14119	6.59266	7.49098	7.16831	7.34365	7.14784	7.29356	7.12253	7.47185	7.87682	7.83842	6.98546	7.2288	7.50376	7.73487	7.80387
ENSRNOG00000000839	11.6445	10.7814	11.3563	11.2728	11.1136	11.3412	11.3999	10.9791	11.2195	11.13	11.3384	11.225	10.7856	11.1018	11.531	11.1087
ENSRNOG00000000840	15.3015	15.2515	15.1011	15.2793	15.2287	15.3776	15.4152	15.3422	15.5443	15.4716	15.2673	15.6559	15.0821	15.3479	15.261	15.2716
ENSRNOG00000000841	14.0067	13.7901	13.8845	13.83	13.8239	13.8992	13.5757	14.0484	13.6198	13.4244	13.9452	13.7854	13.78	13.8093	13.9044	13.9485
ENSRNOG00000000842	13.4253	12.9721	13.1291	13.2209	13.3179	13.2289	13.2518	13.0407	13.2229	13.2731	13.1223	12.7358	12.8972	13.3427	13.3065	13.2354
ENSRNOG00000000843	7.992	8.64211	9.079	8.67431	8.64955	8.74619	8.93704	8.59454	8.9837	8.81463	9.05519	8.57883	8.63248	9.10393	8.45349	8.84422
ENSRNOG00000000844	7.2538	7.35555	6.65491	7.07697	6.9593	7.04418	7.19409	7.24966	6.90139	7.30939	7.38961	7.15799	8.17025	7.07671	7.20061	6.53203
ENSRNOG00000000846	6.99706	8.19601	6.92018	7.18102	7.32882	6.97323	6.67085	7.21036	6.99153	6.56189	6.96339	7.34604	7.73493	6.81558	7.7896	6.2557
ENSRNOG00000000847	15.257	15.0854	15.0095	15.1694	15.1176	15.2792	15.2679	14.9874	15.2645	15.258	15.1193	15.2373	14.9115	15.155	14.9343	15.1963
ENSRNOG00000000848	12.5762	12.3275	12.702	12.5911	12.665	12.605	12.6711	12.3578	12.7212	12.6459	12.7878	12.4498	12.4057	12.7303	12.549	12.6288
ENSRNOG00000000850	8.29492	8.30701	9.07225	8.74916	8.98783	8.79841	9.03452	8.49774	9.20715	8.94586	8.70178	8.35838	7.78415	9.2483	8.1718	9.33814
ENSRNOG00000000851	14.3048	14.1171	14.2489	14.2329	14.2556	14.0317	14.4393	14.0426	14.1688	14.202	14.3246	14.0833	13.9402	14.2774	14.2596	14.299
ENSRNOG00000000852	14.7399	14.2487	14.1559	14.3292	14.4793	14.3212	14.0304	13.9312	14.177	14.5078	14.2147	13.9569	13.8727	14.5034	14.5208	14.5374
ENSRNOG00000000853	11.8451	11.2861	10.9078	11.5836	11.5476	12.091	11.8239	11.7023	11.3226	11.7917	11.2038	10.7429	11.1339	11.4006	10.5882	12.0583
ENSRNOG00000000854	7.04669	6.79328	6.23935	6.96536	6.85112	6.98593	7.87579	7.2245	7.00592	7.68027	7.12905	6.5888	7.62734	7.01801	6.46226	6.76555
ENSRNOG00000000855	7.91837	8.04937	7.87611	8.04274	7.85604	8.41735	8.13918	7.95761	8.6325	8.16409	8.39209	7.70399	7.94128	8.90339	7.89639	8.348
ENSRNOG00000000857	6.69104	6.71271	6.63169	6.90854	7.37845	6.97134	7.06604	7.03228	7.8993	7.13862	7.15533	6.60062	7.52781	6.74728	6.87178	7.23148
ENSRNOG00000000858	8.53277	8.86636	8.51018	8.67228	8.63083	8.86042	8.6331	8.82846	8.78535	9.13261	8.62904	8.78915	8.99273	8.40973	8.93626	8.84955
ENSRNOG00000000860	6.39786	6.24428	6.38781	6.49209	6.71787	6.69621	6.5085	6.5343	6.36766	6.55296	6.52608	6.4169	5.89699	6.03165	6.78267	6.34381
ENSRNOG00000000866	12.1519	12.5199	12.3837	12.333	12.438	12.4952	12.0093	12.5812	12.3801	12.0377	12.4893	12.5507	12.6121	12.1194	12.5689	12.1365
ENSRNOG00000000869	10.0225	10.4923	10.3138	10.2654	10.5569	10.1495	10.0576	10.9579	10.169	10.4798	10.3865	10.4311	10.6129	10.2808	10.837	10.4025
ENSRNOG00000000871	6.06175	6.83026	6.82285	6.49012	6.43048	6.80767	5.98772	6.27015	6.82349	6.48598	6.16765	6.26053	7.10751	6.351	6.31359	6.70159
ENSRNOG00000000873	7.98416	7.31982	6.97419	7.34649	8.15599	6.69101	6.95379	7.05868	6.70943	7.10955	7.09672	6.39892	6.25343	7.45956	7.80822	7.58489
ENSRNOG00000000875	12.6201	12.4001	12.6526	12.6462	12.9471	12.7621	12.495	12.6489	12.7458	13.0744	13.1172	12.6085	12.296	12.8291	13.1133	13.0379
ENSRNOG00000000878	8.43922	7.99675	8.47076	8.77789	9.57239	7.69786	10.4904	7.79061	8.89419	8.42064	10.4568	7.3934	7.33356	9.85542	7.27685	9.38288
ENSRNOG00000000886	14.2238	14.3976	14.1007	14.2055	14.1864	14.3742	13.95	14.4963	14.256	14.2419	14.4205	14.2484	14.4345	14.4108	14.529	14.3836
ENSRNOG00000000888	14.1959	14.3335	14.428	14.3264	14.2464	14.4174	14.3372	14.3694	14.4301	14.4235	14.2254	14.1105	14.3997	14.3274	14.5189	14.4052
ENSRNOG00000000893	14.2213	14.0488	14.3209	14.2874	14.3585	14.1516	14.6233	14.4171	14.4013	14.4354	14.3834	14.048	14.1504	14.4223	14.3841	14.4316
ENSRNOG00000000897	7.70003	8.03514	8.1863	8.06304	8.05848	8.43178	7.96651	7.49556	8.62263	8.53588	8.23102	7.30441	8.2655	8.52192	7.85055	8.56178
ENSRNOG00000000900	12.7549	12.5411	12.7364	12.6934	12.8077	12.6131	12.7073	12.9597	12.7836	12.9519	13.0467	12.7796	12.7393	13.0155	12.9757	13.0593
ENSRNOG00000000901	12.7519	12.7389	13.0337	12.8814	12.9296	12.8245	13.0095	12.6941	12.9846	13.1398	12.9281	12.8324	12.7431	12.9343	12.9416	12.9627
ENSRNOG00000000902	14.94	15.0975	15.0658	15.01	15.065	15.0018	14.8897	15.2254	15.077	14.9651	14.9791	15.0549	15.2923	15.1282	15.111	14.887
ENSRNOG00000000903	11.4794	10.7747	11.0962	11.2167	11.2745	11.3024	11.3729	11.3592	11.1996	11.6372	11.0727	11.254	11.0376	11.0888	11.1767	11.3544
ENSRNOG00000000907	10.6667	10.1575	9.51646	10.3399	10.5552	10.3602	10.7832	10.8564	9.7993	10.3876	9.95373	9.45224	9.84617	10.5173	9.14109	10.7618
ENSRNOG00000000913	9.74755	9.8427	9.89587	10.0298	10.061	10.0752	10.5562	10.2173	9.99295	10.1148	9.9513	9.64973	9.76049	9.7847	9.92898	9.86444
ENSRNOG00000000920	10.0169	10.5376	9.75907	10.2292	10.7144	9.88961	10.4578	10.9694	10.5094	9.93069	10.6708	9.92501	10.3439	10.4181	10.2998	10.7717
ENSRNOG00000000921	15.0684	15.2094	14.9194	15.0581	15.0896	14.917	15.1447	15.4205	15.1012	15.0556	14.9775	15.1114	15.3236	15.1684	15.0106	15.1311
ENSRNOG00000000922	11.3513	11.2892	11.2307	11.4118	11.4117	11.4158	11.7719	11.5358	11.3932	11.4118	11.7021	11.5243	11.2036	11.0856	11.4304	11.4904
ENSRNOG00000000923	13.8042	13.8144	13.7536	13.7719	13.998	13.7569	13.5046	13.9685	13.8766	13.6653	13.6262	13.882	14.0528	13.7718	13.7337	13.6071
ENSRNOG00000000924	10.9632	11.4847	10.9177	11.0123	11.0098	11.0697	10.6289	11.0978	11.0007	10.8964	10.7963	11.0658	11.5376	11.3092	10.2776	11.2883
ENSRNOG00000000925	11.7576	11.3764	11.6228	11.6125	11.5249	11.7844	11.6087	11.6602	11.534	11.6566	11.5434	11.706	11.5753	11.5737	11.5212	11.4353
ENSRNOG00000000931	12.8282	12.7958	12.5454	12.7327	12.9425	12.6309	12.6537	12.7882	12.5793	12.7938	12.3612	12.8147	12.7885	12.3458	12.5769	12.5624
ENSRNOG00000000936	10.8218	11.0271	10.9469	11.0386	11.2192	11.1711	11.0454	11.0318	11.0147	11.3388	11.0995	10.6919	10.3473	10.9208	11.4551	11.4709
ENSRNOG00000000937	10.6764	11.2196	11.6458	11.2394	11.3231	11.2273	11.3441	11.0368	11.6781	11.0846	11.5068	11.2051	10.6676	11.2718	11.7708	11.3208
ENSRNOG00000000938	14.5111	14.1992	14.4698	14.3428	14.3551	14.4518	14.0698	14.4378	14.3596	14.3687	14.5043	14.6663	14.3879	14.51	14.4568	14.4083
ENSRNOG00000000940	12.5898	13.402	12.7091	12.8746	12.3997	13.0649	13.0822	13.444	13.0145	13.064	12.5117	12.7243	13.3259	13.0435	12.8205	13.3019
ENSRNOG00000000954	14.1326	13.731	13.6371	13.7666	13.7045	13.6141	13.7802	13.9084	13.6899	13.7745	13.6976	14.1209	13.8225	13.69	13.7775	13.8793
ENSRNOG00000000956	10.2331	9.67939	9.4792	9.90024	9.43946	10.2465	10.3238	9.40044	9.85753	10.4093	8.80172	10.074	10.3531	9.66739	8.0181	9.27844
ENSRNOG00000000957	14.8083	14.5325	14.5183	14.5121	14.4693	14.2925	14.4516	14.5981	14.3174	14.302	14.4913	14.4709	14.5033	14.6535	14.5912	14.6434
ENSRNOG00000000962	11.0124	10.7801	10.8199	10.8416	10.6576	10.9078	10.8716	10.9664	10.6807	11.0077	10.7622	10.9784	10.9259	10.8844	10.993	10.6869
ENSRNOG00000000967	13.0994	12.8698	13.5329	13.2049	13.1048	13.2534	13.3688	12.921	13.2634	13.3715	12.8006	13.2483	13.1386	13.0421	12.5957	13.168
ENSRNOG00000000969	5.80112	5.89408	7.09031	6.21993	5.83383	5.84672	6.85349	5.82462	6.35158	5.41107	6.12992	5.68915	6.54575	6.07087	5.64069	5.98293
ENSRNOG00000000979	11.046	11.6077	11.2011	11.2292	11.3006	11.1354	11.0845	10.9756	11.1134	11.1775	10.9952	11.5084	11.2881	11.0123	10.9143	10.9802
ENSRNOG00000000981	13.4507	13.5275	13.3038	13.3855	13.3073	13.4835	13.2403	13.5905	13.1948	13.3607	13.2889	13.5115	13.4733	13.3492	13.1749	13.5669
ENSRNOG00000000983	11.2633	11.3646	11.7404	11.5527	11.3879	11.7345	11.8251	11.4023	11.6064	12.1359	11.711	11.5657	11.5524	11.7441	11.6219	11.4337
ENSRNOG00000000985	12.5553	12.7	12.9131	12.8244	12.8204	13.0913	12.8661	12.812	12.911	13.1047	12.8899	12.5624	12.6066	12.9179	12.9229	12.9516
ENSRNOG00000000988	12.3282	11.6815	12.5135	12.2537	12.2713	12.3475	12.38	11.8015	12.3392	12.3875	12.1904	11.9986	11.7155	12.3121	12.0853	12.2516
ENSRNOG00000000989	13.4011	13.3831	13.4088	13.386	13.3217	13.3433	13.4578	13.3993	13.2034	13.5344	12.8993	13.6226	13.326	13.2115	12.9423	13.2722
ENSRNOG00000000990	14.1004	14.3156	14.1425	14.2478	14.499	14.1409	14.2883	14.1634	14.1672	14.409	14.0128	14.1991	14.3191	14.1376	13.8059	14.0629
ENSRNOG00000000991	11.9416	11.2288	11.4688	11.7574	11.7353	11.8928	12.2769	11.7033	11.7679	11.9649	11.5163	11.0446	11.3869	11.6611	11.152	12.022
ENSRNOG00000000994	9.93294	9.69595	9.71537	9.85136	9.74893	9.68081	10.3342	10.0547	9.51978	9.89643	9.98456	9.44857	9.30225	9.92548	9.96565	10.2053
ENSRNOG00000000996	14.1141	13.978	14.2771	14.2245	14.4656	14.3295	14.183	14.2442	14.2183	14.2569	14.4254	14.0016	13.9678	14.1886	14.3718	14.2161
ENSRNOG00000001001	6.15081	6.04919	6.1881	6.32087	5.79186	7.15641	6.58886	6.49591	6.91265	5.95182	6.24499	6.21505	5.94169	6.61518	6.39613	5.54598
ENSRNOG00000001005	7.45771	6.73335	7.45905	7.31953	7.41775	7.4298	7.41955	7.44907	7.70729	7.29859	7.6437	7.43487	7.37054	7.37733	7.01407	7.73239
ENSRNOG00000001006	13.2639	12.5103	12.9553	12.899	12.547	13.0069	13.1105	12.4869	12.8622	12.86	12.4206	13.3136	12.8986	12.6529	11.4503	13.0449
ENSRNOG00000001007	8.64819	8.2646	7.20907	8.04074	7.32168	7.07986	9.72102	8.05723	6.87697	7.68146	7.45906	7.98745	7.10917	7.89507	7.70573	6.8952
ENSRNOG00000001009	14.892	14.3129	14.4763	14.5082	14.5665	14.1617	14.64	14.3109	14.3809	14.3879	14.7591	14.4839	14.1442	14.652	14.6535	14.7172
ENSRNOG00000001010	13.4672	12.9857	13.1783	13.1734	13.3107	13.2012	12.8976	12.8531	12.885	12.8748	12.6827	13.2035	12.8716	12.8295	12.5541	12.9101
ENSRNOG00000001031	8.9714	8.81537	8.96073	8.64014	5.99849	9.57143	9.52339	8.89007	9.04634	9.5282	7.13182	10.1892	9.6538	8.28607	8.13703	8.8404
ENSRNOG00000001032	11.9944	12.3217	12.3099	12.2464	12.1416	12.3358	12.3749	12.2404	12.3473	12.4641	12.3231	12.4038	12.3047	12.2017	12.3091	12.2447
ENSRNOG00000001033	11.2814	11.0707	11.1725	11.1838	11.4487	11.052	11.0777	11.2548	11.1137	11.1977	11.2061	11.5814	11.4603	10.8511	11.0108	11.0013
ENSRNOG00000001035	10.4353	10.5515	10.9284	10.7025	10.834	10.7139	10.7519	10.6064	10.8098	10.9786	10.8084	10.6855	10.3806	10.8054	10.801	10.8987
ENSRNOG00000001036	10.7177	10.3994	10.5379	11.1119	12.0909	10.9622	11.9634	10.9773	10.7188	11.9302	12.207	11.0803	10.3923	10.9256	10.554	10.5579
ENSRNOG00000001037	11.3888	11.6421	11.7053	11.6551	11.9238	11.6519	11.6186	11.7946	11.7764	12.1774	11.8139	11.7154	11.7295	11.8562	11.7762	11.8603
ENSRNOG00000001039	11.6321	11.6372	12.0869	11.8681	11.907	11.8716	12.0739	12.0103	12.1023	12.0279	12.0151	11.9557	11.8383	11.9401	11.8805	12.0216
ENSRNOG00000001044	13.1223	12.8901	13.3728	13.2533	13.4483	13.2396	13.4466	13.1436	13.3315	13.4407	13.4942	12.9303	12.9203	13.3496	13.2625	13.4568
ENSRNOG00000001047	13.4489	13.6136	13.6449	13.6214	13.7594	13.6891	13.5722	13.4178	13.9409	13.5587	13.8763	13.3358	13.4463	14.0281	13.8628	13.4668
ENSRNOG00000001048	8.05744	8.37648	7.59474	7.76205	7.1973	7.81971	7.52664	7.84813	7.20347	7.74845	7.01378	8.44876	7.71909	7.76324	7.74615	7.26069
ENSRNOG00000001049	15.1432	15.1569	15.3806	15.3108	15.5232	15.2844	15.3767	15.2769	15.5137	15.3055	15.4134	15.2844	15.1976	15.181	15.3945	15.2628
ENSRNOG00000001050	12.6288	12.6976	13.027	12.767	12.5649	12.8743	12.8091	12.7175	12.8107	12.8689	12.6848	12.8668	12.8295	12.7732	12.7648	12.7363
ENSRNOG00000001052	10.6382	10.2777	10.6821	10.6071	10.5656	10.297	11.1823	10.8812	10.5156	10.8572	10.7723	10.7256	10.4562	10.6108	10.6304	10.8572
ENSRNOG00000001053	14.7319	14.8209	14.7106	14.7711	14.8692	14.6192	14.8747	14.9242	14.7106	14.7548	14.847	14.7867	14.9586	14.7322	14.7141	14.7421
ENSRNOG00000001056	13.9496	13.8101	14.1039	13.9151	13.8116	13.8908	13.9247	13.6115	14.155	13.8763	13.9533	13.6458	13.6778	14.0696	14.3543	14.0138
ENSRNOG00000001058	11.6925	11.923	11.7761	11.8324	11.8648	11.9507	11.7874	11.7619	11.8999	12.2113	11.7566	11.9516	11.6321	11.8197	11.8777	12.0182
ENSRNOG00000001060	12.508	12.618	12.6183	12.6249	12.8109	12.5714	12.6231	12.668	12.6606	12.9392	12.4133	12.6014	12.5729	12.5864	12.6987	12.5983
ENSRNOG00000001061	13.8435	12.8598	13.1151	13.2236	13.107	13.0391	13.3772	12.8559	13.0464	13.1929	13.0494	13.0002	12.799	13.2694	13.0521	13.3919
ENSRNOG00000001065	11.9018	12.4034	12.5141	12.2841	12.4737	12.028	12.3833	12.1028	12.3628	12.4132	11.8403	12.3658	12.3508	11.9882	11.9401	12.1801
ENSRNOG00000001068	14.9144	15.0087	15.1232	15.031	15.1064	14.9587	15.0747	15.0763	15.1915	14.9359	15.1389	15.0137	14.9114	15.0739	15.2093	15.1148
ENSRNOG00000001080	12.8034	12.4232	12.7142	12.5939	12.6082	12.7284	12.2858	12.4369	12.6443	12.3755	12.6823	12.621	12.62	12.6426	12.7059	12.4426
ENSRNOG00000001082	12.1757	12.1134	12.2634	12.1216	11.7277	12.12	12.3295	11.8572	12.1578	12.0348	11.7818	12.0487	12.1449	12.1812	11.71	12.1269
ENSRNOG00000001083	12.922	12.7218	12.6526	12.7959	12.9174	12.7367	12.825	12.8655	12.7045	12.7981	12.778	12.7641	12.6529	12.6809	12.5804	13.0489
ENSRNOG00000001088	11.0572	11.0053	11.1987	11.2167	11.2933	11.466	11.2795	11.25	11.5615	11.3973	11.5205	11.323	11.0835	11.2304	11.3416	11.308
ENSRNOG00000001092	6.7618	6.62093	7.25583	7.71369	6.51428	6.37968	12.7496	8.18711	7.82842	7.90509	7.77047	7.49312	6.34449	6.58254	6.86214	6.70092
ENSRNOG00000001108	11.6991	11.9321	12.3198	12.0396	12.0694	11.9799	12.2373	12.3557	12.1792	12.2571	12.3575	12.2843	12.2531	12.0661	12.4082	12.0478
ENSRNOG00000001111	9.78457	10.3894	10.2578	10.174	10.2155	10.2281	10.1684	10.323	10.175	10.2688	10.2109	10.5886	10.0827	10.0903	9.99828	10.2594
ENSRNOG00000001113	14.4145	14.6128	14.4987	14.6297	14.9555	14.656	14.6408	14.6526	14.7256	14.6855	14.7375	14.245	14.2114	14.6884	14.6415	14.8979
ENSRNOG00000001114	13.1109	12.7364	13.0448	12.8539	12.7119	12.6963	12.823	12.8017	12.9151	13.0214	13.0255	13.385	13.2449	12.9166	13.0428	12.8589
ENSRNOG00000001130	8.56416	7.74158	7.56895	7.92992	8.12717	8.10974	7.46791	7.97327	7.748	8.21852	8.46819	8.42248	7.29201	8.9095	8.30421	7.77287
ENSRNOG00000001135	15.1111	15.1707	15.0454	15.1144	15.0228	15.1556	15.1811	15.1668	14.9508	15.1971	14.9605	15.0949	15.0835	15.0402	14.956	15.133
ENSRNOG00000001136	14.9091	14.5662	14.8137	14.7741	14.7056	14.6997	14.9503	14.6915	14.749	14.9109	14.5191	14.7998	14.6089	14.7367	14.6414	14.7267
ENSRNOG00000001138	13.7797	13.5358	13.6874	13.7169	13.875	13.7816	13.6417	13.5739	13.7124	13.9749	13.3932	13.6847	13.5774	13.5826	13.5867	13.5542
ENSRNOG00000001142	11.6006	11.8736	11.9975	11.9054	11.8337	12.1072	12.02	12.0754	12.1375	12.0244	11.8659	12.0469	11.8653	11.7549	11.9196	11.9921
ENSRNOG00000001143	13.0611	13.4383	13.08	12.9389	12.3616	13.2922	12.4	13.0286	12.8684	12.7968	13.1428	13.5356	13.3203	13.6056	13.1144	12.936
ENSRNOG00000001148	15.2092	14.9323	15.1406	15.1314	15.1018	15.1298	15.2747	15.0676	15.0076	15.0635	15.0743	14.6762	14.7771	15.2117	15.072	15.2771
ENSRNOG00000001149	12.4047	12.3287	12.172	12.3769	12.3938	12.4693	12.4931	12.116	12.1415	12.5321	11.922	11.841	12.1315	12.2166	11.7849	12.4082
ENSRNOG00000001152	6.502	6.60218	6.35035	6.59091	6.79369	6.65456	6.64267	7.14521	6.51212	6.753	7.51452	6.98127	6.7446	6.98972	6.99511	6.47943
ENSRNOG00000001153	9.57399	10.1812	9.89221	9.98008	10.3292	10.2795	9.62441	9.67136	10.1289	10.2065	10.5319	9.60215	10.1485	10.1937	10.364	9.70603
ENSRNOG00000001156	12.6397	12.9857	12.0785	12.4167	12.5312	12.6227	11.6426	12.3778	12.1443	12.1062	12.8725	12.8712	12.6142	13.1518	12.3055	11.9543
ENSRNOG00000001158	13.305	13.0749	13.0551	13.0899	13.1086	12.9201	13.0755	13.4172	13.1179	12.8449	13.2052	12.9089	13.2455	13.4675	13.3164	13.1652
ENSRNOG00000001159	6.98466	7.30534	6.2984	6.64722	6.0163	7.06268	6.21597	7.63668	6.13818	6.53516	7.11853	7.98033	7.76053	6.59954	5.98883	7.4116
ENSRNOG00000001162	7.25387	7.39643	7.91712	7.49291	7.36867	7.20599	7.81539	7.18635	7.92335	7.13491	7.75475	7.5833	6.95406	7.41324	7.87668	7.87145
ENSRNOG00000001163	11.7435	11.7135	11.9643	11.976	11.9448	12.1	12.3898	12.0056	12.2023	12.2947	11.998	11.5706	11.6929	12.0027	12.0073	12.2123
ENSRNOG00000001164	6.59947	6.85147	6.73258	6.98331	6.72065	7.52219	7.47349	7.11401	6.93965	6.83918	7.00206	6.69868	7.23793	6.38087	6.29302	6.53372
ENSRNOG00000001169	10.9925	11.149	11.5917	11.3744	11.4264	11.4356	11.6514	11.4961	11.715	11.6841	11.5387	11.6371	11.4361	11.415	11.1841	11.4925
ENSRNOG00000001170	15.4681	15.2958	15.4644	15.4273	15.4712	15.4516	15.4125	15.3471	15.4714	15.4485	15.4877	15.4606	15.1946	15.531	15.3782	15.5086
ENSRNOG00000001171	11.0575	11.096	11.1969	11.1475	11.2622	11.1474	11.1251	11.2184	11.1288	11.319	11.0829	11.4064	11.2071	10.9578	11.0561	11.1016
ENSRNOG00000001172	14.4804	14.4319	14.4236	14.5428	14.6439	14.6833	14.5938	14.5886	14.4804	14.6576	14.4881	14.1138	14.5043	14.5094	14.3979	14.5846
ENSRNOG00000001173	14.5841	14.7764	15.0068	14.7766	14.1718	15.0885	15.0319	14.4343	15.0634	14.6257	14.0612	14.7232	14.6532	14.5774	14.1024	14.7588
ENSRNOG00000001174	12.2522	11.9714	12.2179	12.2552	12.1923	12.5806	12.3171	12.2261	12.1395	12.5557	12.7114	12.2708	11.789	12.2898	12.3708	12.5909
ENSRNOG00000001177	8.28751	7.45781	7.78397	7.93467	7.9137	7.9434	8.22165	7.59395	7.84243	7.58851	7.63722	7.85718	7.28521	7.4859	7.56215	7.51905
ENSRNOG00000001182	12.854	12.5849	12.7751	12.8098	12.9859	12.7216	12.9372	12.9492	12.9158	12.8391	12.9851	12.6536	12.6027	12.8957	13.0256	12.9494
ENSRNOG00000001183	7.80625	8.65765	7.47689	8.05049	7.82191	8.11444	8.4258	8.11072	8.01812	8.27211	8.2726	8.10627	8.46078	7.60709	8.58683	7.60696
ENSRNOG00000001184	10.0869	9.87206	10.1797	10.0605	9.7906	10.1286	10.305	10.2927	10.0114	10.4705	10.349	10.394	10.2926	10.4248	9.99673	10.2
ENSRNOG00000001185	13.9526	13.5238	13.676	13.7346	13.8556	13.7209	13.6789	13.6696	13.6591	13.8136	13.4836	13.7433	13.68	13.6245	13.5308	13.5878
ENSRNOG00000001187	6.95421	7.13557	7.43584	7.14388	7.27332	7.25243	6.81191	6.57736	7.56675	6.85726	6.92223	6.59738	6.75963	6.6095	7.09963	8.04981
ENSRNOG00000001189	12.9478	12.3246	10.9593	11.9238	11.9844	12.004	11.3227	10.8034	10.8792	11.4289	11.9948	11.8303	11.0191	12.2194	10.9524	11.3974
ENSRNOG00000001190	13.1686	13.417	13.1973	13.2638	13.1707	13.3042	13.3251	13.2305	13.2307	13.2901	13.346	12.9175	13.1217	13.2914	13.5829	13.439
ENSRNOG00000001195	7.73309	7.28721	6.61256	7.48284	6.64149	6.6367	9.98598	7.58283	6.75701	7.25961	6.60471	7.50555	7.04692	6.33618	5.98814	6.5432
ENSRNOG00000001201	12.2363	11.9194	12.3275	12.1843	12.1193	12.189	12.3143	12.1433	12.2802	12.0797	12.1044	12.2064	12.0818	11.9831	12.2282	12.1032
ENSRNOG00000001203	12.9315	12.5851	12.6848	12.7108	12.6902	12.681	12.6925	12.5798	12.7632	12.7404	12.8925	12.7598	12.7445	12.7878	12.8147	12.7679
ENSRNOG00000001204	12.9231	13.1198	13.0456	13.1086	13.1207	13.1007	13.3416	13.0491	13.2892	13.1285	13.1868	12.5503	12.987	13.3763	13.2944	13.0751
ENSRNOG00000001211	13.4377	12.8305	13.1883	13.1915	13.3238	12.9908	13.3781	13.0563	13.1995	12.9897	13.2196	13.0711	12.8827	13.0959	13.1793	13.0866
ENSRNOG00000001212	6.95828	7.12789	6.75692	7.10724	7.0707	7.44941	7.28027	7.31274	7.59029	7.43006	7.094	7.53693	7.18286	7.21481	6.9865	6.78582
ENSRNOG00000001214	14.5844	14.0144	14.1457	14.3224	14.6827	14.1961	14.3109	14.2589	14.2426	14.5589	14.4443	14.5255	14.1641	14.3671	14.1286	14.1947
ENSRNOG00000001215	12.878	12.4081	12.299	12.5186	12.4556	12.3884	12.6827	12.5571	12.5362	12.4288	12.3667	12.5207	12.4169	12.4928	12.3654	12.6309
ENSRNOG00000001216	11.777	12.2228	11.9288	11.9439	11.8566	11.9285	11.9497	11.9785	12.0004	12.1715	11.9088	11.8541	11.9754	12.1671	12.1071	12.1886
ENSRNOG00000001217	6.68291	5.76017	5.7129	5.98654	5.72345	6.03021	6.00962	6.49206	5.61279	6.07941	6.33142	7.15213	5.92593	6.05064	5.62897	6.32873
ENSRNOG00000001223	12.4164	11.7212	11.8797	12.0944	12.0694	12.0483	12.4317	12.0794	11.9731	12.0398	11.9539	11.6353	11.7474	12.1702	11.8	12.1062
ENSRNOG00000001225	11.8106	11.3277	11.3422	11.4032	11.3067	11.1563	11.4759	11.3386	11.3234	11.2226	11.0834	11.5038	11.3109	11.3996	11.5586	11.0464
ENSRNOG00000001227	13.6886	14.0599	13.5472	13.7037	14.0063	13.4705	13.4498	13.7578	13.5218	13.2861	13.0473	13.5177	13.4682	13.3476	13.8377	13.2602
ENSRNOG00000001232	11.1178	10.8101	11.1246	11.2064	11.0966	11.0138	12.0754	11.2634	10.6487	11.2422	10.7821	10.8308	10.659	10.5612	10.7736	10.821
ENSRNOG00000001235	13.8667	13.6713	13.6141	13.7733	13.7796	13.8163	13.8915	13.5789	13.8831	13.5355	13.6655	13.0762	13.5957	13.8682	13.7856	13.6259
ENSRNOG00000001237	12.9739	12.9783	13.5249	13.3196	13.8145	13.4533	13.1728	13.3475	13.346	13.7561	13.5303	13.3149	12.8193	13.4866	13.1699	13.6003
ENSRNOG00000001238	12.8774	12.9343	13.181	13.0437	13.0832	13.1137	13.0726	12.9735	12.993	13.2558	13.1107	13.0256	12.8562	13.0228	13.1016	13.0986
ENSRNOG00000001239	14.399	13.6662	13.9614	14.0034	13.9678	13.9458	14.08	13.8326	13.9341	13.9703	13.5678	13.8868	13.7823	13.9455	13.8992	13.6543
ENSRNOG00000001245	14.1533	14.024	14.1635	14.0971	14.1252	14.0291	14.0877	14.2114	14.0189	14.2182	13.9149	14.4283	14.1732	13.8118	14.1342	14.0178
ENSRNOG00000001247	13.2248	13.236	13.3361	13.3	13.4225	13.2807	13.3	13.311	13.3097	13.6446	13.2531	13.4426	13.3	13.3033	13.2476	13.3722
ENSRNOG00000001250	11.9974	11.5338	11.4813	11.8398	12.0355	11.6274	12.3636	11.7334	11.6767	11.6875	11.8376	11.4178	10.7616	11.8847	11.5002	11.9639
ENSRNOG00000001251	9.09982	9.12243	9.62693	9.7883	11.7982	8.97197	10.1105	10.0222	9.68432	9.77454	10.4552	8.48388	8.55123	9.46847	9.76241	10.2439
ENSRNOG00000001252	11.3503	10.9746	11.3756	11.3417	11.588	11.3591	11.4022	11.4561	11.2243	11.7184	11.6291	11.4463	11.1095	11.2851	11.3393	11.6248
ENSRNOG00000001253	13.8457	13.8608	13.9511	13.9185	13.9328	13.8976	14.0229	14.0109	13.8395	13.9987	14.0387	13.8532	13.7621	14.1218	14.0243	13.8782
ENSRNOG00000001260	10.5009	10.2307	10.4235	10.4769	10.4455	10.569	10.6917	10.4559	10.7716	10.5205	10.6509	10.1484	10.2183	10.529	10.7982	10.685
ENSRNOG00000001261	7.22821	7.83354	8.72219	8.14368	8.43691	8.06744	8.57381	7.78522	8.57051	8.65344	8.40657	7.76903	7.28308	8.5579	8.44581	8.25786
ENSRNOG00000001269	14.3464	14.6177	14.8881	14.6722	14.8282	14.5157	14.8368	14.8548	14.6882	14.7121	14.9172	14.162	14.6682	14.9893	14.9839	14.7923
ENSRNOG00000001275	6.35015	6.59281	6.27231	6.74418	6.1355	7.08281	8.0315	7.22615	6.77067	6.53633	6.90341	6.08788	6.60896	6.13234	6.73019	6.44747
ENSRNOG00000001277	11.7871	11.4779	11.4182	11.5597	11.435	11.671	11.5693	11.5401	11.3115	11.8271	11.5344	11.6827	11.6673	11.5013	11.3882	11.5355
ENSRNOG00000001278	11.8143	12.0521	12.2023	12.0675	12.2133	11.979	12.1441	12.3285	12.2516	12.2129	12.5655	12.2384	12.0555	12.262	12.4103	12.4308
ENSRNOG00000001284	6.13921	5.83503	6.28311	6.23176	6.2986	6.20146	6.63318	5.94481	6.47691	6.68604	7.07105	6.81653	5.87491	6.54961	5.94332	6.55378
ENSRNOG00000001287	9.18678	8.65302	9.52211	9.26857	9.07384	9.39262	9.78308	9.4546	9.55514	9.47336	9.12656	9.12451	9.17743	9.20022	8.41928	10.092
ENSRNOG00000001289	12.3207	11.4676	11.497	11.7857	11.7844	11.704	11.9405	11.7381	11.4665	12.0236	11.6175	11.8193	11.5056	11.8204	11.1478	12.1024
ENSRNOG00000001294	12.3642	12.3014	12.4941	12.499	12.7183	12.4762	12.6399	12.8849	12.5196	12.7651	12.4641	12.5168	12.4639	12.6233	12.4151	12.5142
ENSRNOG00000001295	15.148	15.0373	15.0959	15.1098	15.1658	15.1052	15.1066	15.3149	15.0521	15.0199	15.0053	14.9549	15.0997	15.0342	15.1692	15.1238
ENSRNOG00000001296	8.95118	10.153	10.0904	9.94742	10.1622	10.507	9.82065	9.93105	10.1742	10.1449	10.0896	9.61315	9.82452	10.2704	9.39877	9.86059
ENSRNOG00000001297	13.0525	12.6884	12.6942	12.8038	12.896	12.8807	12.6111	12.8831	12.5906	13.3283	13.2281	13.0335	12.8115	12.9512	13.239	13.0557
ENSRNOG00000001299	12.7937	12.9584	13.5047	13.2094	13.2811	13.1854	13.5328	12.9737	13.3165	13.447	13.2703	12.7535	12.8496	13.3398	13.0645	13.4167
ENSRNOG00000001300	12.6591	12.7533	13.1414	13.0424	13.1576	13.4021	13.141	13.2365	13.2054	12.9895	12.9985	12.6976	12.5824	13.3579	12.4363	13.1729
ENSRNOG00000001302	14.8277	14.4404	14.2458	13.6312	11.7506	13.7715	12.751	15.0557	14.0459	12.6412	15.3399	11.9221	15.8467	16.6901	16.5116	16.2788
ENSRNOG00000001303	12.2011	12.6352	12.5912	12.5408	12.5805	12.6897	12.5469	12.8239	12.559	12.7789	12.6258	12.5638	12.5843	12.5135	12.7672	12.6174
ENSRNOG00000001309	12.7753	12.6142	13.0673	12.8458	12.3761	12.9916	13.2504	12.7652	13.0101	12.8563	12.3715	12.8741	12.9413	12.8722	11.9441	12.9407
ENSRNOG00000001312	12.3448	11.4331	11.9795	12.0024	11.9042	12.1103	12.2426	11.5502	12.0145	12.1003	11.9045	11.745	11.6335	11.8128	11.7307	11.9776
ENSRNOG00000001313	13.3687	13.2041	13.2369	13.2068	13.0807	13.27	13.0804	13.2041	13.0508	13.3354	13.0447	13.5544	13.2146	13.2141	12.8497	13.3867
ENSRNOG00000001314	13.1695	12.9902	12.916	12.9267	13.0808	12.7093	12.6945	13.1021	12.5858	12.7774	12.9327	13.0567	13.1665	12.8461	12.8292	13.0139
ENSRNOG00000001316	14.4918	14.596	14.6317	14.6117	14.6244	14.6796	14.6468	14.6131	14.6498	14.6591	14.6267	14.5267	14.5462	14.615	14.6111	14.6268
ENSRNOG00000001325	10.7632	9.4997	9.54992	9.88829	9.8224	9.90667	9.78782	9.60713	9.51306	10.0964	9.8129	10.0415	9.72525	9.61727	9.72348	10.0122
ENSRNOG00000001331	13.352	13.1532	13.3209	13.2427	13.3665	13.1589	13.1048	13.4038	13.3096	13.2692	13.4964	13.2086	13.2828	13.5298	13.6134	13.4346
ENSRNOG00000001333	6.11989	6.31933	5.74787	6.01118	6.09046	5.86705	5.9225	6.42578	6.49443	6.81143	6.13075	6.66956	6.78306	6.22098	5.91956	7.08029
ENSRNOG00000001335	11.7064	12.123	12.1506	12.0529	12.2694	12.0459	12.0222	12.2182	12.2372	12.1793	12.1609	12.1987	12.1242	12.2029	11.9469	12.1196
ENSRNOG00000001336	10.3396	9.49074	10.425	10.3588	10.9445	10.1018	10.8509	10.0713	10.2387	10.4127	10.2505	9.36658	9.10901	10.0884	10.3437	10.4617
ENSRNOG00000001338	8.52317	8.75088	9.47483	9.11596	9.42397	9.04294	9.47995	9.33797	8.9296	9.68202	9.38387	9.49813	8.7018	8.96487	8.52282	9.63148
ENSRNOG00000001339	12.7555	12.5705	13.045	12.8519	12.9583	12.8857	12.8966	12.7511	13.0159	12.875	12.926	12.8709	12.6355	12.741	12.9853	12.8116
ENSRNOG00000001344	13.8921	13.7405	13.5649	13.7482	13.6982	13.658	13.9355	13.9882	13.801	13.5876	13.9407	13.7304	13.654	14.035	13.7879	13.8337
ENSRNOG00000001345	13.956	13.7437	14.0452	13.9318	13.8399	13.9365	14.0693	13.9266	14.0459	13.9131	14.1751	13.9126	13.7824	14.0111	14.2411	14.0153
ENSRNOG00000001347	10.659	10.4278	10.7853	10.8152	11.052	10.9858	10.9814	10.664	10.5339	10.9953	11.0366	10.2622	9.89821	10.802	10.6887	11.0955
ENSRNOG00000001348	13.1787	12.3364	12.4517	12.6558	12.6809	12.6832	12.6038	12.8039	12.3178	12.5431	12.657	12.6337	12.4778	12.6105	12.6622	12.5166
ENSRNOG00000001349	11.531	11.1672	11.7979	11.6083	11.553	11.8412	11.7593	11.622	12.0391	11.6532	11.9919	11.5108	11.308	11.8852	12.0147	11.6743
ENSRNOG00000001350	11.8447	12.0312	12.1974	12.0319	12.0591	12.1067	11.9525	12.1573	12.1536	12.0819	12.0579	12.1957	12.3868	11.9354	12.0339	11.9609
ENSRNOG00000001353	10.6087	10.2969	10.4299	10.3514	10.2474	10.479	10.0466	10.2852	10.0696	10.4106	10.4371	10.6485	10.3037	10.4431	10.3682	10.3725
ENSRNOG00000001355	12.395	12.5425	12.7189	12.6379	12.6419	12.6244	12.9048	12.6995	12.6338	12.9317	12.7506	12.5144	12.5485	12.7169	12.7822	12.6285
ENSRNOG00000001357	9.54376	9.00387	9.36028	9.27627	9.5122	8.83291	9.4046	9.14137	9.26103	9.46816	9.31852	9.34157	9.06699	9.58324	9.53153	9.14099
ENSRNOG00000001360	7.46294	7.17227	7.57611	7.30066	7.14864	6.91501	7.52901	7.17967	6.81781	7.25808	7.63415	8.07236	7.39173	7.4955	7.20919	6.63935
ENSRNOG00000001367	9.0533	9.1857	7.70883	8.41361	8.17076	8.05785	8.30525	8.19676	7.84267	8.13189	7.71643	8.54803	8.96105	8.13179	8.24624	7.56327
ENSRNOG00000001368	15.0128	14.9949	15.1623	14.9837	14.6515	14.9485	15.1323	14.4208	14.9592	15.1051	14.7945	15.0535	15.0899	14.9805	14.5041	14.9639
ENSRNOG00000001369	9.70573	9.16789	9.81756	9.48702	9.6885	9.36299	9.17945	8.88306	9.62276	8.90267	9.0139	8.5427	9.12248	8.78442	9.509	10.0872
ENSRNOG00000001376	13.2068	13.1676	13.1477	13.262	13.38	13.1377	13.5319	13.2577	13.4704	12.9357	13.189	12.5238	13.1495	13.428	13.3553	13.016
ENSRNOG00000001379	7.98877	7.34466	8.4585	7.66742	6.88647	7.99513	7.33099	7.84291	7.35001	7.26345	6.98721	8.91252	8.21876	6.87641	7.19417	7.37939
ENSRNOG00000001383	10.2525	10.3619	10.6424	10.6587	11.1316	10.9271	10.6368	10.8797	10.8978	10.9462	10.7774	10.3032	10.3527	10.7843	10.6835	10.6341
ENSRNOG00000001385	13.4431	13.3696	13.4809	13.5306	13.6507	13.4886	13.7505	13.3483	13.6287	13.4431	13.4435	13.243	13.3783	13.3297	13.3103	13.3975
ENSRNOG00000001388	8.61877	8.72038	8.09344	8.47042	8.39677	8.64778	8.34537	8.64332	8.50092	8.07483	8.72158	8.18587	8.12311	8.05739	9.38309	8.72437
ENSRNOG00000001389	8.47707	7.97013	8.26296	8.35769	8.32656	8.65959	8.44984	8.74005	8.1072	8.78733	8.90513	8.20473	8.57896	8.62534	8.2997	8.64932
ENSRNOG00000001392	7.31701	7.23692	6.65326	7.10758	7.25125	6.96554	7.22149	7.5892	7.12519	6.99948	8.42869	7.46837	6.7312	6.96191	8.8889	7.36784
ENSRNOG00000001396	12.797	12.4038	12.6133	12.6228	12.6462	12.6753	12.6011	12.7936	12.5644	12.5994	12.9416	12.3398	12.4492	12.9079	12.8289	12.9759
ENSRNOG00000001399	6.70655	6.82504	5.95205	6.44735	6.55612	6.39113	6.25319	6.73482	6.40708	6.35787	6.6063	6.93312	6.45283	6.68169	6.65247	6.23109
ENSRNOG00000001409	15.3752	15.4046	15.2655	15.359	15.2323	15.4194	15.4567	15.4608	15.2219	15.4314	15.4241	15.2493	15.2459	15.4875	15.3925	15.4765
ENSRNOG00000001412	6.37734	6.20554	6.20263	6.25543	6.60052	6.1888	5.95773	6.36449	6.21577	6.30223	6.31867	6.1688	6.33242	6.4437	6.20062	6.39919
ENSRNOG00000001414	9.16415	8.83504	8.4251	8.90004	8.75781	9.00014	9.218	8.84369	8.84798	9.31122	9.47354	8.87878	8.39539	8.98015	9.30099	9.41958
ENSRNOG00000001416	13.8749	13.0654	12.6226	12.8003	11.6809	13.2754	12.2823	12.2797	12.0134	11.9891	13.3259	13.3111	12.6297	14.6865	11.6858	12.3115
ENSRNOG00000001417	13.4083	13.5812	13.5628	13.6508	13.9156	13.5813	13.8556	13.9011	13.7692	13.7343	13.7966	13.0819	13.4237	13.8913	13.6767	14.0277
ENSRNOG00000001425	9.28904	9.8188	10.1817	9.73882	9.45422	9.8403	9.84884	9.59264	9.53536	9.17159	9.41187	10.1215	8.84366	9.37489	9.97704	8.9867
ENSRNOG00000001429	11.3647	11.0385	11.0828	11.1736	11.337	11.1148	11.1036	11.349	11.2107	11.1881	11.3247	11.3947	11.0754	11.2474	11.3281	11.2169
ENSRNOG00000001434	5.57382	5.93549	6.01733	5.99553	6.16309	6.0683	6.21514	5.90138	6.40818	6.68217	6.15586	5.91607	6.07441	6.5873	5.93983	5.88199
ENSRNOG00000001436	15.6604	15.528	15.428	15.5202	15.5737	15.4273	15.5039	15.2363	15.5668	15.6279	15.4625	15.6657	15.5002	15.5589	15.2589	15.5087
ENSRNOG00000001440	15.2387	14.8639	15.2124	15.1394	15.19	14.9911	15.3405	14.8844	15.23	15.2646	15.1745	14.9357	15.0379	15.0785	15.2043	15.2029
ENSRNOG00000001441	12.3813	12.2348	12.5268	12.4977	12.6546	12.6812	12.5075	12.4353	12.5205	12.5866	12.7232	12.1458	12.3777	12.3731	12.5558	12.5917
ENSRNOG00000001442	14.3945	14.7315	14.3904	14.5006	14.3998	14.436	14.6513	14.5926	14.4617	14.3953	14.6538	14.3619	14.5979	14.4466	14.7354	14.5205
ENSRNOG00000001449	13.6033	14.0131	13.9832	13.8951	14.0647	13.8844	13.8221	13.8378	14.0349	14.0256	14.0793	13.9431	13.8903	14.0497	13.9015	13.9942
ENSRNOG00000001452	11.815	11.8969	11.7095	11.8509	12.0262	11.6561	12.0016	11.701	11.6446	11.9302	11.4282	11.8975	11.4091	11.6319	11.3815	11.7646
ENSRNOG00000001454	14.2182	14.1968	14.0958	14.1466	14.1742	14.1439	14.0507	14.1045	14.0491	14.0503	14.0446	14.1642	14.2262	14.0088	14.0683	14.0028
ENSRNOG00000001457	12.2802	12.5276	12.553	12.5392	12.5188	12.6978	12.6577	12.6242	12.6782	12.7061	12.6436	12.6079	12.4672	12.5462	12.4635	12.6527
ENSRNOG00000001469	10.3173	10.1533	10.6833	10.6276	10.4471	10.9802	11.1845	10.8403	10.9226	10.9781	11.2878	10.7371	10.3315	10.6273	11.1092	10.5909
ENSRNOG00000001470	12.6812	13.2603	12.6825	12.9302	12.9933	12.9299	13.0343	12.3305	12.8717	13.3304	12.1944	13.324	13.0878	12.1603	12.1082	12.3532
ENSRNOG00000001476	8.21098	8.40465	7.71597	8.14839	8.65662	8.02592	7.87619	8.26935	8.18021	7.62355	8.359	8.35609	7.72494	7.89305	8.45971	7.85083
ENSRNOG00000001478	12.1145	12.6479	12.1326	12.2584	12.2605	11.9923	12.4022	12.6676	12.1648	11.9976	12.7423	11.9679	12.1955	12.5108	12.8388	12.7223
ENSRNOG00000001479	13.8613	13.6299	13.97	13.8101	13.8014	13.741	13.8571	13.8121	13.8166	13.7778	13.5307	13.7369	13.7702	13.8086	13.6648	13.7604
ENSRNOG00000001480	9.77294	9.9446	9.60002	9.98458	9.90133	10.6259	10.0627	10.0939	10.0788	10.4971	10.3696	9.2039	9.59612	10.853	9.33829	10.8765
ENSRNOG00000001488	13.8908	13.3072	13.6203	13.5311	13.5554	13.3216	13.4913	13.4393	13.3462	13.3438	13.4609	13.4886	13.4274	13.4631	13.6285	13.4864
ENSRNOG00000001489	12.118	12.0229	12.3916	12.2073	12.1736	12.195	12.3424	12.3469	12.2596	12.4959	12.4837	12.4051	12.3414	12.3437	12.4587	12.2331
ENSRNOG00000001492	11.203	10.9387	11.0276	10.9542	11.1132	10.9731	10.4694	10.1848	10.5316	10.9986	10.5415	11.2482	10.8157	10.8397	10.0952	10.5122
ENSRNOG00000001494	14.5335	14.4105	14.7845	14.6011	14.8095	14.4437	14.6249	14.4192	14.6507	14.6452	14.4768	14.4843	14.4197	14.6016	14.4635	14.6024
ENSRNOG00000001499	7.8656	7.14781	7.71134	7.55988	7.29422	7.38194	7.95838	7.57146	6.97819	7.81562	7.51214	7.96721	7.3874	7.2517	7.71428	7.12765
ENSRNOG00000001500	12.3113	11.7523	12.2218	12.1448	12.1204	12.1278	12.3355	11.905	12.233	12.3005	11.6927	12.333	11.902	11.8676	11.7746	11.9512
ENSRNOG00000001501	10.4737	10.5074	10.8051	10.6461	10.5984	10.8034	10.6885	10.5395	10.5796	10.9885	10.9531	10.7407	10.5674	10.5132	10.7445	10.9179
ENSRNOG00000001506	13.1924	12.9102	13.3863	13.2706	13.3818	13.4544	13.2984	13.2735	13.423	13.5639	13.3312	13.4702	13.059	13.3604	13.1256	13.2478
ENSRNOG00000001514	10.4933	10.1844	9.8209	10.1837	9.4391	11.1153	10.0495	9.57966	9.85239	10.796	10.8492	9.89927	9.89783	11.5423	9.62198	10.2666
ENSRNOG00000001517	12.2314	12.5428	12.7819	12.6341	12.4405	12.9131	12.8949	12.6988	12.8107	12.807	12.4066	12.6761	12.5819	12.4141	12.4	12.5527
ENSRNOG00000001524	11.106	10.822	11.0929	11.0044	10.8106	11.0082	11.1866	11.2026	11.0126	11.0812	11.2878	11.2967	11.2414	11.0956	11.104	11.0102
ENSRNOG00000001525	13.5501	13.5465	13.6786	13.6076	13.6418	13.6863	13.5422	13.8041	13.8881	13.5541	13.9326	13.5824	13.6309	13.9089	13.7591	13.9852
ENSRNOG00000001527	7.54441	8.1831	8.28636	8.113	8.53016	8.18269	7.95128	8.4661	7.99325	8.7681	7.88684	8.3451	8.24848	8.43287	7.48824	8.14662
ENSRNOG00000001528	15.1222	14.6251	14.5055	14.6699	14.402	14.728	14.6363	14.7352	14.4437	14.8724	14.682	14.8155	14.8368	14.7722	14.7764	14.763
ENSRNOG00000001531	9.69427	9.31159	10.0049	9.71118	9.69563	9.63904	9.92167	9.73064	9.62414	9.9551	9.98364	9.84664	9.79541	9.68225	9.84789	9.66841
ENSRNOG00000001544	12.9086	13.4833	13.4644	13.394	13.1557	13.6258	13.726	13.3719	13.7023	13.4758	13.6729	12.6692	13.2189	13.6772	13.451	14.0296
ENSRNOG00000001547	10.5898	10.9708	10.517	10.617	10.4981	10.5865	10.5396	11.1034	10.6261	10.463	10.7459	11.0076	11.2401	10.7384	10.7858	10.4113
ENSRNOG00000001548	12.1413	12.5034	12.4831	12.5191	12.4941	12.7033	12.7895	12.8524	12.4466	12.4383	12.4587	12.1954	12.4945	12.3037	12.5485	12.2364
ENSRNOG00000001551	14.0379	13.7182	13.7806	13.8001	13.7696	13.7673	13.727	13.8052	13.6423	13.6176	13.6214	13.8329	13.8198	13.6585	13.7755	13.5784
ENSRNOG00000001555	11.4796	11.3211	11.5925	11.5378	11.6378	11.7128	11.4831	11.7928	11.4392	11.8127	12.1628	11.7381	11.357	11.682	11.9301	11.8065
ENSRNOG00000001557	10.2092	10.579	9.62759	10.0829	9.80621	9.97042	10.3048	10.544	9.62859	10.0323	9.49377	10.7107	10.3598	10.1585	9.11447	9.65599
ENSRNOG00000001559	12.1085	11.8191	12.5356	12.3194	12.5769	12.4086	12.4676	12.3206	12.5489	12.6604	12.7441	12.1026	12.2747	12.3891	12.4507	12.5118
ENSRNOG00000001571	8.06174	7.91551	7.00677	7.39731	6.78858	7.80698	6.80426	7.92665	7.18382	7.07485	7.31971	8.08957	8.06841	7.39696	7.62538	7.4832
ENSRNOG00000001575	11.489	11.3631	11.9727	11.7008	11.8386	11.745	11.7967	11.4622	11.9028	12.0293	11.7663	11.8077	11.7234	11.5457	11.8996	11.3494
ENSRNOG00000001584	10.0787	10.4397	10.1069	10.2929	9.91105	10.382	10.8389	10.7404	10.3859	10.6623	10.3753	10.2548	10.1461	10.3235	10.4738	10.9368
ENSRNOG00000001593	12.0698	12.2304	12.0673	12.0686	11.9218	11.8843	12.238	12.1244	12.1165	12.1955	12.1487	12.4245	12.3299	12.1382	12.1441	12.0584
ENSRNOG00000001597	14.6447	14.7907	14.6589	14.6389	14.509	14.5843	14.6459	14.8453	14.6266	14.683	14.5914	14.985	14.9767	14.695	14.5021	14.6736
ENSRNOG00000001607	10.4471	10.3561	11.1728	10.9699	11.1262	10.9267	11.7902	10.6909	11.2433	11.4721	11.0808	10.0484	10.8915	11.1429	10.8638	10.5617
ENSRNOG00000001611	14.7515	14.0405	13.9936	14.2045	14.2391	14.0845	14.1177	14.0231	14.0618	14.0527	13.8921	14.0658	13.9871	14.1334	14.1548	14.0833
ENSRNOG00000001621	9.62343	9.99018	10.1687	9.96783	9.61947	10.1644	10.2408	9.97931	10.1236	10.2586	9.82562	10.2437	10.0071	9.86896	9.99373	9.8477
ENSRNOG00000001622	6.60024	6.4164	7.65514	7.05987	7.9892	6.7684	6.92984	6.92037	6.73038	7.03406	6.91256	6.53997	6.72754	6.66988	6.68879	6.72792
ENSRNOG00000001628	15.304	15.2869	15.1655	15.1228	15.1712	14.9024	14.9067	15.3254	15.104	14.7364	15.1379	14.8433	15.4268	15.4283	15.398	15.1564
ENSRNOG00000001629	13.7186	13.626	13.4187	13.5398	13.7046	13.4217	13.3493	13.6322	13.4853	13.5776	13.7224	13.7022	13.4417	13.8046	13.6141	13.7829
ENSRNOG00000001633	13.5309	13.3852	13.2388	13.3402	13.5481	12.9694	13.369	13.6023	13.3498	13.422	13.3775	13.5785	13.6309	13.4212	13.5414	13.3194
ENSRNOG00000001640	14.0497	13.6973	13.6143	13.5826	13.4376	13.373	13.3239	14.1033	13.6134	13.1333	14.4528	13.8507	14.1739	14.2571	14.1889	14.038
ENSRNOG00000001652	10.3281	10.901	11.1103	10.9202	10.6754	11.025	11.4816	11.044	11.2354	11.1293	10.8921	10.2412	10.8895	11.1143	11.0129	11.17
ENSRNOG00000001653	11.0609	11.3915	11.2974	11.3543	11.1885	11.2012	11.9863	11.5889	11.6251	11.2524	11.1962	10.9952	11.4234	11.2439	11.3268	11.3845
ENSRNOG00000001654	13.0583	13.5801	13.2544	13.2266	13.2203	13.0304	13.2164	13.488	13.3069	13.1828	13.1759	13.4669	13.7111	13.319	13.1781	13.2459
ENSRNOG00000001656	7.16612	8.11944	7.65148	7.83343	7.40163	8.40058	8.26133	7.6559	8.06023	8.28356	6.99568	7.47169	7.54933	7.4394	7.49382	7.52264
ENSRNOG00000001657	13.5979	13.8719	14.0045	13.8428	13.7972	13.8474	13.9378	13.8005	14.0093	14.0117	13.939	13.9177	13.9758	13.9162	13.9287	13.8404
ENSRNOG00000001662	13.1878	13.6795	13.6495	13.5589	13.5109	13.605	13.7207	13.7504	13.7262	13.8892	13.6125	13.5785	13.593	13.7425	13.609	13.8401
ENSRNOG00000001679	7.0388	6.52623	6.07595	6.53657	7.30452	5.90313	6.37078	6.39782	6.0536	7.15725	6.04205	7.15925	6.57482	5.94739	6.3066	6.14572
ENSRNOG00000001691	8.81889	9.76241	8.61851	8.97622	8.81251	9.29183	8.55318	9.17972	9.2268	8.42738	9.15963	9.51239	9.6194	8.86831	9.24338	8.35852
ENSRNOG00000001692	6.77358	6.97097	7.1766	6.96113	7.04124	6.3813	7.42308	6.94291	6.99175	6.80071	7.04348	7.0631	7.16953	6.91332	6.47016	7.19241
ENSRNOG00000001700	13.7201	13.7276	13.7322	13.7577	13.5387	13.8477	13.9797	13.5662	13.8733	13.5563	13.5198	13.5559	13.7991	13.6528	13.5182	13.409
ENSRNOG00000001704	10.5894	12.2036	12.0046	11.8612	11.5513	12.3773	12.441	11.7151	12.4416	12.2876	10.8176	11.0634	11.6318	11.2207	10.9673	12.4257
ENSRNOG00000001706	12.5147	12.6825	13.3618	12.9982	13.265	13.0397	13.1252	13.0433	13.0514	13.505	13.0521	12.8947	12.9255	13.1528	12.7716	13.0906
ENSRNOG00000001709	15.3471	15.1499	15.3109	15.2607	15.2339	15.25	15.2724	15.2262	15.1977	15.248	15.2208	15.2222	15.2182	15.2551	15.2352	15.2433
ENSRNOG00000001710	14.1397	13.9566	14.161	14.1215	14.1936	14.0933	14.1851	14.0458	14.1263	14.1405	14.0557	14.1627	13.942	14.0229	14.1352	13.9561
ENSRNOG00000001715	11.2427	11.3953	11.1479	11.3114	12.0019	11.3283	10.7523	12.0211	11.4804	11.5636	12.1604	11.2788	11.1258	11.765	12.6378	11.8907
ENSRNOG00000001717	13.4581	13.9182	13.7835	13.7138	13.7799	13.6383	13.7047	13.7451	13.7396	13.8629	13.6587	13.8178	13.7271	13.8717	13.744	13.6387
ENSRNOG00000001719	14.5662	14.7448	14.7728	14.6283	14.6191	14.4282	14.6384	14.7497	14.5071	14.5256	14.6648	14.6431	14.6817	14.7188	14.725	14.7383
ENSRNOG00000001720	12.4001	11.4148	11.3509	11.7455	11.3323	12.0408	11.934	11.5603	11.2834	11.7127	11.0342	11.2893	11.9384	11.5567	10.5396	11.5052
ENSRNOG00000001727	12.958	13.4397	13.1412	13.153	13.0579	13.1114	13.2098	13.261	13.2029	13.2328	13.2591	13.36	13.3033	13.0618	13.3259	13.3237
ENSRNOG00000001728	10.3599	9.70364	9.867	10.0625	9.44904	10.266	10.7293	9.18368	10.058	10.4663	9.40139	9.78855	9.76429	9.89901	9.04437	9.81237
ENSRNOG00000001730	11.4021	11.8771	11.9719	11.7586	12.116	11.8572	11.3273	12.0237	11.9437	11.9029	11.7361	11.7772	12.1115	11.7942	11.8823	11.887
ENSRNOG00000001733	13.8383	13.6007	13.4234	13.5293	13.4426	13.4642	13.4066	14.1642	13.5898	13.5182	14.0922	13.6473	13.7107	14.1313	14.3616	13.9725
ENSRNOG00000001736	12.4854	12.5422	13.0371	12.729	12.6914	12.7181	12.8999	12.863	12.7059	12.8865	12.6638	12.6212	12.7009	12.7806	12.5439	12.9771
ENSRNOG00000001742	12.7178	12.8389	12.515	12.6737	12.753	12.6084	12.6091	12.459	12.4742	12.5557	12.4358	12.5409	12.2831	12.5696	12.5553	12.5708
ENSRNOG00000001752	10.636	10.6792	10.5418	10.8556	11.0524	10.9533	11.2707	10.8899	11.0274	11.0608	10.7299	10.3673	10.2813	10.8461	10.3309	11.2128
ENSRNOG00000001762	10.5691	10.8563	11.1246	10.8695	10.8767	10.9614	10.8291	10.5937	10.787	10.8543	10.9001	10.6896	10.5654	10.9886	10.8924	10.651
ENSRNOG00000001769	14.5991	14.3946	14.4303	14.4463	14.6844	14.4612	14.1084	14.0368	14.3331	14.5303	14.3368	14.2629	14.0974	14.5262	14.4362	14.4148
ENSRNOG00000001770	10.0636	10.3602	10.135	10.2671	10.1696	10.4638	10.4102	10.3816	10.5096	10.4518	10.5943	10.2547	10.3291	10.6361	10.3026	10.3538
ENSRNOG00000001773	13.6744	13.8209	13.8182	13.7955	13.6522	13.8568	13.9504	13.9786	13.9117	13.9764	14.0093	14.0303	14.0362	13.9656	13.7825	13.8664
ENSRNOG00000001783	13.9485	14.0242	13.8122	13.9517	13.9259	13.957	14.0424	14.191	13.975	13.9965	13.9737	13.9307	14.2374	13.9028	13.9961	13.9454
ENSRNOG00000001789	13.0178	13.249	13.2688	13.2139	13.2982	13.2366	13.2132	13.0415	13.2152	13.1685	12.9803	13.1542	13.1361	12.9847	12.9696	13.0234
ENSRNOG00000001792	6.92584	7.07409	7.05636	7.06363	6.60311	7.38162	7.34077	7.30021	7.03575	7.23565	7.4058	7.66779	6.83004	6.96176	7.23127	7.22805
ENSRNOG00000001796	11.6926	11.0845	11.4861	11.6263	12.9828	11.4725	11.0393	11.6623	11.1692	12.2304	12.7382	12.3046	11.685	11.4972	11.6867	11.1914
ENSRNOG00000001797	12.1519	11.7325	11.873	11.974	11.963	12.004	12.1197	12.0456	11.9541	12.266	11.9221	12.0965	12.0143	11.8512	11.9247	11.9778
ENSRNOG00000001803	13.8274	13.9485	14.0542	13.9575	13.9716	13.9399	14.0032	14.2631	13.8103	14.1069	14.03	14.1195	14.2415	13.9672	13.8579	13.9813
ENSRNOG00000001804	11.5236	12.1751	11.6986	11.9002	11.777	11.9932	12.2338	12.1891	12.2216	11.9886	11.8843	11.1108	11.7537	12.1539	12.2992	12.3542
ENSRNOG00000001806	7.51232	7.05593	7.39703	7.19454	7.17952	6.8339	7.18856	7.53688	6.64399	6.67197	7.12438	7.71553	7.32711	6.8402	7.06783	6.87958
ENSRNOG00000001809	6.73145	6.90692	6.99821	6.77774	6.48705	7.05673	6.48608	7.06548	7.0116	6.42621	6.08156	6.24684	6.37989	7.35038	7.0171	6.91941
ENSRNOG00000001811	11.9976	12.5202	12.7789	12.5485	12.5221	12.6874	12.785	12.4561	12.7509	12.804	12.4753	12.5751	12.6145	12.3952	12.3418	12.3963
ENSRNOG00000001813	13.6059	13.8737	13.7201	13.6638	13.5727	13.6595	13.5509	13.9054	13.5841	13.8978	13.4678	14.1292	14.0199	13.6026	13.6591	13.6268
ENSRNOG00000001815	14.6848	14.5082	14.6848	14.6021	14.5611	14.7289	14.4449	14.7741	14.6401	14.4326	14.576	14.8954	14.8207	14.3582	14.6614	14.4536
ENSRNOG00000001817	13.3316	13.2726	13.4535	13.347	13.3246	13.4085	13.291	13.3941	13.326	13.2554	13.3387	13.5356	13.2323	13.2281	13.3261	13.3583
ENSRNOG00000001821	7.12378	7.26658	6.62085	7.2637	6.53395	6.45837	9.57868	7.2531	6.81034	7.72956	7.04563	7.35816	7.15613	6.38287	6.8376	6.55877
ENSRNOG00000001823	11.1253	11.4659	11.1589	11.2729	11.2213	10.9074	11.7587	11.5083	11.3721	11.1443	10.9501	11.4463	11.5739	11.0348	10.8364	11.1728
ENSRNOG00000001827	13.4319	13.6245	13.3933	13.6416	13.8059	13.6282	13.9658	13.9018	13.7267	13.8315	13.3102	13.5246	13.6239	13.6578	13.1559	13.4317
ENSRNOG00000001828	12.1935	12.7343	12.5206	12.5289	12.5912	12.5583	12.5755	12.531	12.7977	12.7443	12.3107	12.7031	12.7375	12.5151	12.2521	12.4608
ENSRNOG00000001829	13.6261	14.1091	13.6235	13.7431	13.8085	13.6436	13.6479	13.6765	13.6323	13.6992	13.6863	13.9415	13.9308	13.65	13.8026	13.3338
ENSRNOG00000001837	14.7621	13.9238	14.3969	14.1446	13.3868	14.2758	14.1221	13.8757	13.789	14.1076	14.1642	14.7267	14.3609	14.0712	14.2911	13.9309
ENSRNOG00000001847	12.6776	12.9005	12.9416	12.8984	13.0351	12.7435	13.0919	13.0097	12.9667	12.9038	12.867	12.8475	12.8187	12.8381	12.8968	12.8882
ENSRNOG00000001849	14.536	14.6741	14.6172	14.5947	14.5237	14.6821	14.5349	14.819	14.6657	14.8553	14.8306	15.1048	14.7251	14.7315	14.6719	14.8274
ENSRNOG00000001852	11.3172	11.137	11.4253	11.2558	11.1883	11.2181	11.249	11.307	11.2636	11.3469	11.0397	11.6792	11.6296	11.0302	11.1578	10.9518
ENSRNOG00000001860	7.16412	7.57649	7.90532	7.74556	7.6609	7.97314	8.19339	7.66121	7.35595	8.32526	7.9621	8.06229	7.56292	7.32075	6.92696	7.92854
ENSRNOG00000001861	11.6062	10.223	10.4619	10.6745	10.6173	10.4985	10.64	10.6111	10.2915	10.5093	10.5613	10.9219	10.2294	10.5566	10.5563	10.8046
ENSRNOG00000001865	6.34436	6.30239	6.83082	6.43398	6.00311	6.51732	6.6059	6.15577	6.04061	6.59824	6.10382	6.54959	6.00526	6.13971	5.99485	6.82877
ENSRNOG00000001867	11.2033	11.1244	11.0378	11.1392	11.1569	11.1459	11.1668	11.1445	11.0327	11.1485	11.1796	11.2734	11.0567	11.166	10.9247	11.0937
ENSRNOG00000001873	9.76044	9.72842	9.95971	10.0469	10.8525	9.56857	10.4116	9.68911	10.0935	9.29698	10.7613	9.52355	9.33467	10.5287	9.07892	9.77804
ENSRNOG00000001885	12.5717	12.2569	12.6161	12.5985	12.7827	12.6391	12.7244	12.585	12.6599	12.8881	12.839	12.3882	12.2567	12.6651	12.8069	12.8087
ENSRNOG00000001889	12.6878	12.2269	12.4567	12.552	12.7634	12.4413	12.7359	11.4879	12.0783	12.0465	11.9955	11.4108	11.811	11.734	12.182	11.732
ENSRNOG00000001890	11.5312	11.2162	11.5759	11.511	11.4228	11.4652	11.8547	11.1302	11.5212	11.5645	11.3353	11.4503	11.0259	11.2846	11.4331	11.2733
ENSRNOG00000001924	6.93316	6.91034	6.98729	6.91316	6.6904	6.92537	7.0324	6.6238	6.92792	7.14172	6.86637	7.11977	6.24369	7.13285	7.1703	6.98861
ENSRNOG00000001926	7.63464	7.71006	7.1263	8.04809	8.33172	7.08687	10.399	7.41049	7.67184	7.96073	7.08734	6.92947	6.38121	6.68661	6.84549	7.05535
ENSRNOG00000001928	12.0869	12.2945	12.1898	12.2342	12.5402	11.8283	12.4653	12.086	12.0342	12.3733	11.898	12.2453	12.4536	12.1178	11.7901	11.5872
ENSRNOG00000001930	11.6368	11.4578	11.3971	11.452	11.3821	11.2961	11.5422	11.3751	11.3394	11.5776	11.2648	11.6174	11.7491	11.3749	11.1892	11.3205
ENSRNOG00000001931	14.5791	14.5563	14.6742	14.5497	14.2829	14.6058	14.6001	14.4968	14.6011	14.6563	14.4418	14.8781	14.7065	14.4869	14.484	14.5504
ENSRNOG00000001942	6.08491	5.68842	5.94814	5.89687	5.6548	6.54668	5.45827	6.2078	6.33081	5.48611	5.89143	6.1586	6.81507	6.28089	5.34041	5.36965
ENSRNOG00000001943	5.81967	7.07221	7.42418	6.82813	7.03431	6.98371	6.6347	6.28651	7.12697	6.93862	6.8336	6.27017	6.8593	6.48778	7.40109	6.58503
ENSRNOG00000001945	5.88744	5.61489	5.88015	5.72332	5.46713	5.07789	6.41241	5.74536	5.63487	6.01383	5.64509	5.36432	5.70089	5.59396	7.21285	5.40511
ENSRNOG00000001949	6.60543	6.25474	7.03208	6.58095	6.71745	6.47605	6.39996	6.17272	6.83025	6.2661	6.72256	6.48261	6.11313	6.26314	7.29127	6.67551
ENSRNOG00000001950	5.76619	5.81391	5.62747	5.86466	5.63284	6.13147	6.2161	5.85068	6.07171	6.04058	6.00146	5.6686	5.41725	6.09358	6.13147	5.7752
ENSRNOG00000001951	6.74674	6.20369	6.10695	6.29461	6.06825	5.81379	6.82824	6.33086	5.77119	5.61538	6.23042	6.45887	6.04382	5.76129	5.67658	6.38471
ENSRNOG00000001953	10.0902	9.85491	10.6013	10.4003	10.5409	10.9085	10.4059	9.84201	10.7843	10.6431	10.2897	10.389	9.97813	10.2271	9.56444	10.3176
ENSRNOG00000001955	6.26287	6.74234	6.44841	6.36488	6.25478	6.54571	5.93517	5.99066	6.42419	5.91164	6.07683	6.04554	6.11776	6.28888	6.31773	6.54197
ENSRNOG00000001957	6.23843	6.83523	6.77732	6.76479	6.88571	6.63857	7.21347	6.05268	6.62482	7.28964	6.40623	6.77818	6.32611	6.05717	6.24623	6.56143
ENSRNOG00000001959	7.22066	7.03454	7.16193	7.22656	7.3881	7.80579	6.74835	6.78719	7.23211	7.62429	6.69146	6.98477	6.11346	7.07077	6.78493	7.87413
ENSRNOG00000001960	10.0711	10.4109	9.96822	10.32	10.7062	10.2114	10.552	11.5003	10.2981	10.2131	10.6309	9.81711	10.4187	10.0821	11.1919	10.6463
ENSRNOG00000001963	11.7659	11.6771	11.6557	11.7553	11.8772	12.0953	11.4608	11.8602	11.7918	11.615	11.6991	11.4711	11.6857	11.5324	11.6942	11.9479
ENSRNOG00000001964	13.9315	13.9771	13.8665	13.8676	13.7075	13.8516	13.8713	13.9244	13.8896	13.6069	14.0872	13.9246	14.1038	13.9567	13.8325	13.9552
ENSRNOG00000001967	6.11517	5.65562	5.51014	5.68009	5.51167	5.96105	5.32691	5.67199	5.52218	5.62571	5.43751	5.41741	6.15401	5.34904	5.56071	5.882
ENSRNOG00000001971	12.7279	13.2317	12.5671	12.8518	12.9362	12.7787	12.8691	13.3109	12.9557	12.9824	13.0878	12.7861	13.2746	13.164	13.2314	12.9005
ENSRNOG00000001973	6.04079	6.60931	6.76655	6.60874	6.99013	7.01249	6.23316	7.20637	6.77628	6.65452	6.50454	7.08958	6.43347	6.41598	6.47194	6.59463
ENSRNOG00000001976	6.32388	6.78616	6.31683	6.27997	5.98884	6.33546	5.92864	5.93339	6.46041	6.39169	5.9369	5.65142	5.88316	6.50607	6.52021	7.6628
ENSRNOG00000001979	13.5504	13.2967	13.1759	13.3399	13.3298	13.3081	13.3784	13.6397	13.2623	13.5331	13.5279	13.4451	13.5169	13.4341	13.5869	13.4785
ENSRNOG00000001980	6.27714	6.62608	6.57352	6.37473	6.81083	6.30419	5.6566	6.5672	6.09207	5.94245	6.39337	6.75352	6.50784	6.30496	6.40214	6.06866
ENSRNOG00000001982	11.1106	11.5454	12.1946	11.866	12.3225	12.0616	11.9616	11.9612	12.28	12.2436	11.7675	11.9348	11.8548	11.5956	11.4771	11.7714
ENSRNOG00000001984	6.5029	6.13808	6.19999	6.27561	6.09647	5.8792	6.83702	6.08476	6.4961	6.75673	6.86786	7.19926	5.65421	6.77531	6.39122	6.76863
ENSRNOG00000001986	6.13264	6.80456	5.57486	6.0442	5.83466	5.51454	6.40395	5.7531	6.07626	6.03402	5.73366	6.2254	5.54897	6.20921	6.17035	6.19614
ENSRNOG00000001989	14.2491	14.1608	14.2071	14.15	14.005	14.086	14.1923	14.3521	14.0978	14.3081	14.5852	14.1612	14.3755	14.3866	14.6031	14.5282
ENSRNOG00000001990	6.1973	6.38402	6.12435	6.38292	6.25239	7.03382	6.30563	6.28932	6.09073	6.44531	6.06528	5.82686	5.806	5.83047	6.32961	6.32343
ENSRNOG00000001991	13.8198	13.1687	13.2423	13.3682	13.2963	13.3129	13.3693	13.1829	13.1746	13.1356	13.2005	13.4648	13.177	13.0076	13.3902	13.1112
ENSRNOG00000001996	12.9125	13.1902	13.1492	13.0885	13.0817	13.0815	13.1161	13.461	13.0528	13.2916	13.3851	13.2826	13.4178	13.2435	13.3486	13.1644
ENSRNOG00000002002	5.92678	5.81927	5.70047	5.81327	5.50864	5.97572	5.94874	6.11129	6.25106	5.74113	5.6755	6.11791	6.05092	5.82582	6.31166	5.43251
ENSRNOG00000002011	6.29494	6.48299	5.98516	6.33259	7.30111	6.10822	5.82311	6.2901	6.39866	6.17242	5.70008	6.47725	6.22989	5.9832	5.56408	5.91912
ENSRNOG00000002012	10.6893	10.9145	11.0877	10.8646	11.0491	10.9127	10.5341	11.2972	10.8023	10.9719	11.1586	11.1176	10.9743	10.9934	11.33	11.0921
ENSRNOG00000002014	6.22611	6.18235	6.22603	6.13776	6.0005	5.98366	6.2079	6.38216	5.64149	6.50427	5.80896	6.22824	5.90563	6.04174	6.50967	6.23357
ENSRNOG00000002026	9.41252	8.45661	9.78899	9.03976	7.85854	9.52585	9.19607	9.67387	9.53267	9.05075	10.0049	9.98772	9.59064	10.6852	9.03331	9.74322
ENSRNOG00000002028	14.0792	13.9451	14.2513	14.1563	14.3292	14.2244	14.1086	14.0628	14.2864	14.1771	14.0948	14.1695	13.9948	13.9905	14.1313	14.0554
ENSRNOG00000002031	9.56263	9.69239	8.82446	9.25246	9.3917	9.12042	8.92318	9.99188	8.96055	8.6387	9.20128	10.2134	9.71548	8.74134	9.28108	8.76396
ENSRNOG00000002035	13.1705	13.1452	13.395	13.3429	13.5887	13.3402	13.4178	13.3033	13.5562	13.595	13.5515	13.3671	13.246	13.4699	13.3056	13.4033
ENSRNOG00000002042	7.41708	8.02197	8.15562	8.23171	8.48417	8.79688	8.51452	7.90089	8.76463	8.63381	9.11379	7.84062	8.01402	8.25617	8.58534	7.84425
ENSRNOG00000002044	10.1176	10.1711	10.1055	10.1388	10.0954	9.92273	10.4207	10.0879	10.4338	10.2366	9.99824	10.7083	10.1843	9.9469	10.1289	9.92717
ENSRNOG00000002045	13.1195	13.3446	12.7922	13.2844	13.1735	13.6718	13.6045	13.4248	13.2421	13.5378	13.0957	12.3927	13.2855	13.2341	12.7374	13.6331
ENSRNOG00000002050	14.5077	14.371	14.4806	14.5052	14.3939	14.5719	14.7063	14.3175	14.7131	14.6042	14.2782	14.2623	14.1035	14.634	14.4458	14.5937
ENSRNOG00000002052	10.7481	10.6567	10.9373	10.9522	11.2924	10.7972	11.2819	11.0724	10.9912	10.8762	10.4743	10.5692	10.4945	10.5995	10.6289	10.8175
ENSRNOG00000002055	11.3187	11.2654	11.5677	11.4482	11.5231	11.5847	11.4296	11.5757	11.5598	11.4619	11.242	11.8411	11.5039	11.0358	11.2344	11.2502
ENSRNOG00000002057	9.62395	9.67213	8.64398	9.58731	9.17874	10.2112	10.1938	9.76213	8.97036	10.4004	8.86522	8.48306	8.16268	9.94256	8.83266	10.2276
ENSRNOG00000002074	8.46744	8.41859	8.68302	8.68236	8.85037	8.72342	8.95131	8.86761	8.79418	8.67656	8.47859	8.09282	8.54603	8.69247	8.04841	9.06589
ENSRNOG00000002079	13.9021	14.2876	14.5941	14.2615	14.1501	14.4084	14.2267	13.9744	14.4387	14.4387	13.9824	14.6142	14.4688	13.9514	13.9061	14.1007
ENSRNOG00000002085	8.81722	9.27149	9.46406	9.27755	9.32136	9.55191	9.23925	9.79135	9.88132	9.57785	9.4917	9.28519	9.54294	9.36455	9.90275	9.70261
ENSRNOG00000002093	10.0958	10.1085	9.86196	10.0433	9.70519	10.1605	10.3277	10.6617	10.0862	10.1035	9.56976	10.44	10.306	9.99002	9.52154	10.126
ENSRNOG00000002094	13.1118	13.1178	12.7427	12.9573	12.8341	12.9008	13.0365	13.043	12.9153	12.954	12.8939	13.1356	13.2643	12.8762	12.8107	12.897
ENSRNOG00000002097	13.5726	13.1133	13.6126	13.2953	12.2445	13.5803	13.6486	12.9432	13.3608	13.4308	12.7244	13.7879	13.4879	13.1473	12.4566	13.6225
ENSRNOG00000002101	13.4293	13.578	13.3384	13.4268	13.2533	13.4044	13.5574	13.6597	13.4357	13.3401	13.4853	13.6003	13.5401	13.4721	13.5025	13.4329
ENSRNOG00000002104	11.6464	12.4182	12.3448	12.1893	12.2811	12.2158	12.2297	12.4105	12.3466	12.4814	12.4229	12.379	12.4089	12.2926	12.3648	12.2745
ENSRNOG00000002115	15.1717	14.9934	15.2354	15.166	15.2278	15.2124	15.1551	14.9945	15.4084	15.0926	15.2852	14.964	14.9941	15.2402	15.3474	15.211
ENSRNOG00000002117	6.7761	6.81841	7.00536	7.08447	8.46074	6.86077	6.58546	7.48371	7.25945	7.13152	7.72433	6.82506	6.33447	6.49008	7.66746	8.21121
ENSRNOG00000002120	6.96533	6.38258	7.07934	6.99126	8.43384	6.4834	6.60305	6.78062	7.53337	7.03917	8.47813	6.99474	6.27601	8.94306	6.38039	7.46523
ENSRNOG00000002121	12.7755	12.9046	13.012	12.9577	13.445	12.8539	12.7554	13.0218	13.107	12.9709	12.6138	12.847	12.8718	12.7911	12.8238	12.9006
ENSRNOG00000002122	11.4814	11.5606	11.2932	11.2134	10.4697	11.2273	11.2482	11.6112	10.9993	11.4067	11.0119	11.7313	12.0576	11.5696	11.1844	11.3073
ENSRNOG00000002126	13.6434	13.9311	13.9795	13.845	13.5837	13.9364	13.9956	13.8254	13.9887	14.0667	13.8642	14.1081	14.1615	13.9744	13.8302	13.6502
ENSRNOG00000002141	14.1314	13.946	14.0897	13.9902	13.8224	14.1214	13.8306	13.9889	14.0972	14.1675	14.1955	14.4655	14.1351	13.9184	14.3201	14.1641
ENSRNOG00000002142	13.6404	13.8958	13.911	13.8664	13.8539	13.7958	14.1012	13.6706	13.8981	13.9685	13.2234	14.2423	13.9243	13.4702	12.9717	13.5005
ENSRNOG00000002144	12.1004	12.2385	12.4158	12.2633	12.1771	12.3114	12.3364	12.4124	12.3688	12.5551	12.2081	12.4938	12.4358	12.3227	12.2253	12.3739
ENSRNOG00000002149	8.55197	8.65586	6.9012	7.74421	7.54462	7.3096	7.50201	8.53958	7.40924	7.57384	7.55272	8.44207	9.25805	7.49194	7.59805	8.02601
ENSRNOG00000002154	9.36376	8.84075	9.11719	9.19115	9.31218	9.03846	9.47458	8.78532	9.05056	10.2958	9.88081	10.1854	8.92406	9.22366	9.64802	8.96798
ENSRNOG00000002158	9.55501	10.4418	9.38544	9.82038	9.35559	9.23288	10.9516	9.54286	10.062	10.2284	8.74827	9.63879	9.33921	10.0547	9.12743	9.88919
ENSRNOG00000002159	9.60286	9.24906	10.3923	9.84582	10.5733	9.81758	9.43984	9.46491	10.1278	10.3741	9.75899	10.4077	9.82933	9.65759	9.61985	9.48288
ENSRNOG00000002161	8.48088	8.27576	7.71533	8.16917	8.33271	7.99285	8.21752	9.07188	7.54061	8.4316	7.43763	8.36875	8.35134	7.90632	7.5045	8.39124
ENSRNOG00000002164	7.46925	6.99088	6.78069	6.94755	7.16904	6.95007	6.32536	7.46284	6.9113	6.39445	8.1757	7.64603	7.08366	7.85255	6.75898	7.73503
ENSRNOG00000002165	8.98669	8.34218	8.26038	8.48852	8.17515	8.75678	8.40992	8.40162	8.59907	8.08769	8.34966	8.38627	8.22685	8.29806	8.88235	8.28236
ENSRNOG00000002167	8.47123	7.90418	7.69321	7.91372	7.25784	7.51621	8.63967	7.72138	7.61875	8.2045	7.73137	9.09189	8.35825	7.88753	7.01496	7.47914
ENSRNOG00000002168	7.99775	9.05668	7.82276	8.09251	7.7595	7.59804	8.32032	7.65313	7.62143	8.28289	7.48578	7.5875	7.97651	8.22923	8.43095	7.9291
ENSRNOG00000002175	12.0268	12.7378	12.0675	12.1311	11.8751	11.9421	12.1371	12.4135	12.0767	12.2361	12.0616	12.4531	12.6893	12.5573	12.1274	12.1454
ENSRNOG00000002186	13.6234	13.7005	13.744	13.718	13.9023	13.5398	13.7982	13.6676	13.8899	13.6518	13.7677	13.5388	13.5269	13.7203	13.8827	13.8584
ENSRNOG00000002187	6.74993	5.94896	5.99584	6.14566	6.04454	6.49363	5.64106	5.92287	6.19647	5.87591	6.2067	7.54614	5.54899	6.01895	5.61906	6.09923
ENSRNOG00000002188	8.17322	8.00469	8.93533	8.49314	8.29611	8.67037	8.87911	8.63096	8.40184	8.48069	8.20884	9.11052	8.25406	7.78407	7.8381	8.34227
ENSRNOG00000002191	10.6714	10.526	10.7348	10.8119	10.7995	10.9874	11.1526	10.7708	10.83	11.2012	10.6393	10.5318	10.4512	10.8445	10.5424	10.7987
ENSRNOG00000002194	13.6962	13.5074	13.1547	13.3165	12.8932	13.6157	13.032	13.5995	13.6234	13.1383	13.7015	13.9328	13.6537	14.4216	12.7405	13.7493
ENSRNOG00000002199	11.8718	11.2834	11.841	11.7301	11.756	11.6912	11.9372	11.6158	11.8206	11.9172	11.8718	11.6772	11.6813	11.8528	11.4862	11.8974
ENSRNOG00000002205	15.0143	15.1786	15.124	15.0617	15.0869	14.892	15.0747	15.1986	14.9762	15.1806	15.1124	15.1786	15.3054	15.0289	15.1884	15.1796
ENSRNOG00000002210	13.363	13.6825	13.6441	13.6794	14.0563	13.7155	13.6148	13.7837	13.8728	13.552	13.4962	13.2817	13.5392	13.5451	13.6369	13.5939
ENSRNOG00000002212	9.83585	10.3804	11.3394	10.6766	10.2651	10.9728	11.2662	9.76617	11.0527	10.9461	9.029	11	10.857	9.85422	7.53188	10.6824
ENSRNOG00000002216	12.0917	11.8343	12.3996	12.1767	12.2742	12.1552	12.305	12.2136	12.4841	12.2026	12.2706	12.2013	12.1935	12.269	12.0677	12.2724
ENSRNOG00000002218	10.3128	9.97423	10.0708	10.1873	9.81566	10.6535	10.2969	9.92234	9.97579	10.8835	10.1233	10.5185	10.1967	10.0054	9.73028	10.2212
ENSRNOG00000002225	10.6135	11.3443	11.7152	11.4224	11.8443	11.5676	11.4497	11.4858	11.9403	11.6858	11.7188	11.5048	11.5255	11.2864	11.6035	11.281
ENSRNOG00000002227	11.2954	11.2589	11.3861	11.4385	12.5588	11.16	10.9721	11.1965	11.2619	11.3566	11.7477	11.5552	11.0089	11.3027	11.1039	11.1384
ENSRNOG00000002229	14.2382	13.9648	13.2295	13.3752	12.758	13.4709	12.5898	14.0064	13.1489	12.8032	14.2872	13.1341	13.988	14.9322	14.1073	14.5862
ENSRNOG00000002240	13.2225	13.0058	13.3525	13.2519	13.2612	13.2457	13.4235	13.1412	13.4495	13.4865	13.6077	13.1055	13.0181	13.6496	13.4326	13.5068
ENSRNOG00000002241	10.3998	10.2149	10.5286	10.4207	10.4774	10.3149	10.5884	10.6912	10.5355	10.721	10.6289	10.5072	10.3307	10.6568	10.7828	10.6762
ENSRNOG00000002247	11.5087	11.5232	11.5008	11.5905	11.6428	11.6295	11.738	11.8657	11.3631	11.8211	11.5115	11.6594	11.7307	11.3068	11.502	11.4655
ENSRNOG00000002251	14.1213	14.1717	14.3945	14.3029	14.4427	14.2128	14.4745	14.3133	14.4636	14.5089	14.1644	14.2097	14.2288	14.279	14.2097	14.3878
ENSRNOG00000002253	8.20875	7.9823	8.71263	8.30419	8.21172	8.22036	8.48935	8.74561	8.34636	8.29501	8.14262	9.04072	8.52563	7.92125	8.38259	8.02186
ENSRNOG00000002254	12.2677	12.1004	12.2698	12.1828	12.2364	12.0413	12.1814	12.366	12.2152	12.2077	12.2763	12.4377	12.3204	12.3447	12.3032	12.1267
ENSRNOG00000002255	13.1177	12.8348	13.2792	13.1571	13.2673	13.1519	13.2919	12.7447	13.2429	13.2588	13.1731	12.7839	12.6834	13.1288	13.2624	13.1267
ENSRNOG00000002256	10.8185	10.5812	11.6618	11.2504	10.4951	12.3749	11.571	11.1003	11.6252	12.2272	11.8763	11.6206	10.8086	11.3775	11.3483	11.8295
ENSRNOG00000002262	12.7605	12.3242	13.107	12.7587	12.7278	12.7527	12.8802	12.4526	13.0921	12.7794	12.8222	12.5423	12.5774	12.9954	12.8806	12.7469
ENSRNOG00000002265	9.86176	9.96972	10.0377	9.95244	10.1688	9.58905	10.0877	10.4362	10.1774	10.0655	11.3644	8.67931	10.8268	11.4273	11.3361	10.3115
[truncated: 8,916 more rows]
