# Supplementary material for: Genetic regulatory subnetworks and key regulating genes in rat hippocampus perturbed by prenatal malnutrition: implications for major brain disorders
Source: Aging (Albany NY). 2020 May 11;12(9):8434–58. doi: 10.18632/aging.103150 (PMC7244046; doi:10.18632/aging.103150)
Supplement: Supplementary Table 7 [file aging-12-103150-s009.xlsx]

## Sheet: Hippocampus
Ensembl_Version	geneSymbol	LocusLinkID	logFC	AveExpr	t	P.Value	adj.P.Val	B
ENSRNOG00000000007	Gad1	24379	0.0344639	13.1519	0.266425	0.793064	0.919098	-6.09519
ENSRNOG00000000034	Nuak2	289419	0.239297	9.96467	1.973	0.0647031	0.294365	-4.36889
ENSRNOG00000000041	Slc26a1	64076	-0.251299	8.33821	-2.0328	0.0577236	0.280153	-4.27187
ENSRNOG00000000044	Tmem175	305623	-0.0455178	12.4629	-1.25056	0.227758	0.541934	-5.3773
ENSRNOG00000000047	Cd82	83628	0.0281492	14.3579	0.348758	0.731482	0.893559	-6.06979
ENSRNOG00000000048	Gak	81659	-0.0235756	13.1403	-0.534272	0.599957	0.830978	-5.98817
ENSRNOG00000000053	Crp	25419	0.169268	5.89144	2.23511	0.0388796	0.228766	-3.93142
ENSRNOG00000000060	Cplx1	64832	0.0243081	14.6736	0.281044	0.782012	0.915105	-6.09118
ENSRNOG00000000064	Atp5me	140608	0.089437	13.7983	1.33051	0.200634	0.508264	-5.28278
ENSRNOG00000000073	Tmed5	289883	0.430728	10.3615	3.06345	0.00693069	0.103383	-2.39301
ENSRNOG00000000096	Pdzk1	65144	-0.0535339	10.2242	-0.660475	0.517653	0.782348	-5.91374
ENSRNOG00000000105	Cplx2	116657	-0.0356671	14.7222	-0.606061	0.552349	0.806525	-5.94768
ENSRNOG00000000108	Aga	290923	0.133054	12.0845	1.23716	0.232571	0.546833	-5.39267
ENSRNOG00000000109	Fgf20	66017	-0.214687	5.10526	-1.36637	0.189332	0.49562	-5.23886
ENSRNOG00000000121	Pigv	366478	0.101699	9.63944	1.38059	0.184994	0.491874	-5.22119
ENSRNOG00000000122	Ak2	24184	0.19987	12.1501	3.3457	0.00376141	0.0784546	-1.83611
ENSRNOG00000000127	Kpna6	362607	-0.271585	9.97994	-2.37007	0.0296623	0.199873	-3.6949
ENSRNOG00000000133	Txndc15	307180	0.0881188	13.5795	1.05038	0.308006	0.622924	-5.59224
ENSRNOG00000000145	Pik3r3	60664	0.176888	13.246	2.49074	0.0231918	0.177627	-3.47783
ENSRNOG00000000155	Cog3	361073	0.00450202	11.1568	0.0733347	0.942382	0.978197	-6.12821
ENSRNOG00000000156	LOC100911486	65049	-0.277534	6.95631	-1.28331	0.21632	0.529991	-5.33916
ENSRNOG00000000157	Atg12	361321	-0.00412616	10.9193	-0.0759411	0.940338	0.977461	-6.12801
ENSRNOG00000000158	Cdo1	81718	0.0705137	14.2706	0.757403	0.459008	0.745359	-5.84648
ENSRNOG00000000161	Chm	24942	-0.134844	11.029	-1.18468	0.252173	0.567449	-5.45153
ENSRNOG00000000164	Lamp2	24944	0.0834397	12.1574	1.12103	0.277606	0.591317	-5.52003
ENSRNOG00000000165	Pfkfb1	24638	-0.170996	6.35189	-1.05528	0.305824	0.62093	-5.58736
ENSRNOG00000000166	Apex2	317628	0.106467	9.99589	1.65203	0.116573	0.391581	-4.85726
ENSRNOG00000000167	Alas2	25748	0.616906	9.60324	2.72759	0.0141713	0.139131	-3.03873
ENSRNOG00000000168	Gatm	81660	0.0391983	13.8865	0.567414	0.577728	0.819221	-5.97009
ENSRNOG00000000170	Slc30a4	64469	-0.173667	11.6308	-2.73404	0.0139802	0.139131	-3.02655
ENSRNOG00000000172	Sqor	691966	0.192566	10.5464	2.42694	0.0264263	0.187612	-3.59321
ENSRNOG00000000177	Plpp2	246115	0.0466208	11.0561	0.29908	0.768444	0.91035	-6.08592
ENSRNOG00000000185	Mpst	192172	0.022153	10.3	0.268388	0.791577	0.918815	-6.09467
ENSRNOG00000000186	Tst	25274	0.118219	12.1494	1.77396	0.0936821	0.351428	-4.67856
ENSRNOG00000000187	Csf2rb	171081	-0.0798873	7.75137	-0.656602	0.520082	0.784153	-5.91625
ENSRNOG00000000195	LOC108348048	301097	0.0802775	9.29848	0.621585	0.542325	0.799852	-5.93828
ENSRNOG00000000201	Gsta5	24422	0.133378	5.62911	0.932458	0.36394	0.674131	-5.70352
ENSRNOG00000000204	Syncrip	363113	0.0202836	11.3843	0.299985	0.767765	0.910128	-6.08565
ENSRNOG00000000221	Abhd5	316122	0.0451022	11.1058	0.50202	0.621987	0.844424	-6.00476
ENSRNOG00000000233	Grm6	24419	-0.582301	8.18118	-5.39938	4.52515e-05	0.0187538	2.217
ENSRNOG00000000236	Zfp207	303763	-0.100174	12.1008	-2.21835	0.0401938	0.232904	-3.9603
ENSRNOG00000000239	Ccl7	287561	0.300057	6.73945	1.14695	0.267028	0.580194	-5.49252
ENSRNOG00000000244	Coil	50998	-0.0575497	9.93352	-0.8852	0.388195	0.694249	-5.74478
ENSRNOG00000000245	Slc16a6	303772	0.0719656	9.78114	0.325361	0.748812	0.902133	-6.0777
ENSRNOG00000000246	Amz2	360650	-0.145481	12.4472	-2.35854	0.0303619	0.20338	-3.71537
ENSRNOG00000000248	Srsf2	494445	-0.054146	12.3042	-1.20273	0.245295	0.558832	-5.43153
ENSRNOG00000000249	Mettl23	287918	0.0831139	10.3531	1.07181	0.298539	0.614667	-5.57076
ENSRNOG00000000250	Jmjd6	360665	0.0272993	10.2177	0.360376	0.722931	0.888586	-6.06567
ENSRNOG00000000257	Smpd3	94338	-0.437467	11.4126	-3.60288	0.00214601	0.0633306	-1.3221
ENSRNOG00000000258	Prmt7	361402	-0.0548164	11.4995	-0.841927	0.411324	0.711869	-5.78084
ENSRNOG00000000264	Def8	307973	-0.126315	11.2726	-2.06139	0.0546337	0.271516	-4.22488
ENSRNOG00000000274	Phyhipl	309901	0.128137	14.4186	1.86631	0.0790549	0.32369	-4.53752
ENSRNOG00000000283	Ess2	360741	-0.200541	11.4865	-4.17116	0.0006198	0.0393934	-0.180375
ENSRNOG00000000303	Cep57l1	294519	0.0191912	9.13539	0.22065	0.82795	0.934741	-6.1064
ENSRNOG00000000304	Cd164	83689	-0.105083	12.7002	-1.35092	0.194136	0.50148	-5.25789
ENSRNOG00000000306	Smpd2	83537	-0.285469	12.1831	-1.56581	0.135513	0.419488	-4.97813
ENSRNOG00000000312	Fig4	309855	-0.030134	13.011	-0.600253	0.556125	0.808816	-5.95114
ENSRNOG00000000321	Cd24	25145	0.0168699	13.3878	0.246896	0.807896	0.926386	-6.10023
ENSRNOG00000000322	Atg5	365601	0.0185499	11.5798	0.293902	0.772332	0.911573	-6.08746
ENSRNOG00000000340	Rtraf	302247	0.213532	12.0265	3.74908	0.00155861	0.057808	-1.02844
ENSRNOG00000000368	Grik2	54257	-0.096776	11.0384	-0.897487	0.381788	0.68859	-5.73424
ENSRNOG00000000386	Pbld1	171564	0.0925788	11.0494	0.593063	0.560817	0.810579	-5.95537
ENSRNOG00000000392	Supv3l1	294385	-0.0887964	12.2825	-0.909922	0.375375	0.683863	-5.72343
ENSRNOG00000000394	Srgn	56782	0.207514	12.0065	2.4772	0.0238457	0.179944	-3.50244
ENSRNOG00000000395	Kif1bp	606294	-0.0632448	14.3151	-1.29418	0.212625	0.525062	-5.32633
ENSRNOG00000000398	Zup1	294390	0.182261	11.3346	2.67402	0.0158573	0.147971	-3.13941
ENSRNOG00000000406	Ros1	25346	0.110362	5.31766	0.959871	0.350353	0.661423	-5.6787
ENSRNOG00000000413	Pln	64672	-0.042029	6.8224	-0.198284	0.845136	0.941809	-6.11111
ENSRNOG00000000420	Nelfe	294258	0.10453	12.0085	1.81196	0.0873989	0.34054	-4.6211
ENSRNOG00000000421	Skiv2l	294260	-0.143102	11.6276	-2.52291	0.0217065	0.172155	-3.41916
ENSRNOG00000000422	Dxo	361799	0.0500828	11.2274	0.720088	0.481094	0.760369	-5.8734
ENSRNOG00000000428	Cyp21a1	24298	0.0412615	5.02206	0.336267	0.740716	0.897857	-6.07408
ENSRNOG00000000431	Atf6b	406169	-0.0976709	13.3579	-1.56777	0.135054	0.41901	-4.97543
ENSRNOG00000000432	Fkbpl	406168	0.0297827	11.1527	0.350447	0.730236	0.89273	-6.0692
ENSRNOG00000000435	Ppt2	54398	-0.184319	12.5222	-2.123	0.0484784	0.254318	-4.12231
ENSRNOG00000000436	Egfl8	406166	-0.145421	7.3474	-0.899381	0.380806	0.687991	-5.7326
ENSRNOG00000000437	Agpat1	406165	-0.113892	13.6632	-2.34407	0.0312622	0.206323	-3.741
ENSRNOG00000000439	Ager	81722	0.0922311	8.67846	0.96477	0.347962	0.660054	-5.6742
ENSRNOG00000000440	Pbx2	406164	-0.257951	12.6297	-3.70992	0.00169802	0.0601692	-1.10714
ENSRNOG00000000441	Gpsm3	406163	0.0654871	9.81161	0.908798	0.375952	0.68394	-5.72442
ENSRNOG00000000442	Notch4	406162	-0.0698508	6.79589	-0.543859	0.593484	0.828434	-5.98305
ENSRNOG00000000451	RT1-Ba	309621	-0.237529	7.84543	-0.592795	0.560993	0.810579	-5.95553
ENSRNOG00000000454	RT1-DOb	365542	-0.135779	5.28525	-0.586474	0.565137	0.81269	-5.95921
ENSRNOG00000000455	LOC103689996	24812	-0.0764195	9.42268	-0.949828	0.355289	0.666002	-5.68787
ENSRNOG00000000456	Psmb8	24968	0.0932973	10.0139	0.651093	0.523547	0.785526	-5.91979
ENSRNOG00000000457	Tap1	24811	-0.237115	10.0088	-1.66532	0.113864	0.388504	-4.83821
ENSRNOG00000000459	Psmb9	24967	-0.107303	8.63147	-0.602105	0.554919	0.807477	-5.95004
ENSRNOG00000000461	LOC108348112	294276	-0.020668	13.8047	-0.52777	0.604368	0.833042	-5.99159
ENSRNOG00000000464	Rxrb	361801	-0.120895	12.6394	-1.62042	0.123237	0.401469	-4.90212
ENSRNOG00000000465	Slc39a7	294281	-0.104858	12.4509	-1.8165	0.0866727	0.339009	-4.61418
ENSRNOG00000000466	Hsd17b8	361802	-0.0756896	12.1578	-1.42461	0.172071	0.473917	-5.16556
ENSRNOG00000000467	Ring1	309626	-0.158436	12.7238	-2.3549	0.0305861	0.203747	-3.72183
ENSRNOG00000000470	Vps52	25218	-0.316315	12.5308	-3.18125	0.00537484	0.0911619	-2.16181
ENSRNOG00000000471	B3galt4	171079	0.0594183	9.22037	0.726934	0.476995	0.758187	-5.86855
ENSRNOG00000000473	Pfdn6	309629	0.111571	14.1884	2.13976	0.0469173	0.24918	-4.09412
ENSRNOG00000000474	Rgl2	294283	0.128209	12.0191	2.24013	0.038494	0.227621	-3.92275
ENSRNOG00000000476	Zbtb22	309630	-0.0305433	11.7501	-0.495038	0.626805	0.846608	-6.00822
ENSRNOG00000000477	Daxx	140926	0.049413	11.429	0.779231	0.44638	0.737233	-5.83014
ENSRNOG00000000479	Kifc1	294286	-0.0407492	7.79794	-0.316446	0.755453	0.90393	-6.08056
ENSRNOG00000000480	Phf1	294287	-0.742872	9.18153	-3.00939	0.00778439	0.109314	-2.49839
ENSRNOG00000000481	Cuta	294288	-0.0128265	12.3018	-0.295659	0.771012	0.911417	-6.08695
ENSRNOG00000000483	Syngap1	192117	-0.91013	10.6378	-2.78345	0.0125968	0.132462	-2.93298
ENSRNOG00000000485	Bak1	116502	-0.133497	10.4005	-1.69838	0.10736	0.376512	-4.79038
ENSRNOG00000000486	Ggnbp1	494520	0.241203	5.91588	1.90986	0.0728864	0.312389	-4.46941
ENSRNOG00000000487	Grm4	24417	0.44064	10.3347	1.34474	0.196087	0.503938	-5.26547
ENSRNOG00000000488	Hmga1	117062	-0.111735	11.7807	-1.15771	0.262726	0.575701	-5.48094
ENSRNOG00000000490	Rps10	81773	0.162134	13.7567	3.02358	0.00755092	0.107909	-2.47078
ENSRNOG00000000499	Tcp11	309641	0.123567	5.10397	0.77299	0.449968	0.739788	-5.83486
ENSRNOG00000000503	Ppard	25682	-0.972005	8.54252	-3.60819	0.00212121	0.0630625	-1.31143
ENSRNOG00000000505	Rpl10a	81729	0.0793301	13.7884	1.58803	0.130399	0.411578	-4.94743
ENSRNOG00000000506	Tead3	294299	-0.0512993	8.04317	-0.366976	0.71809	0.886862	-6.06327
ENSRNOG00000000510	Clps	25680	0.138212	5.66625	1.87948	0.0771414	0.321427	-4.51702
ENSRNOG00000000511	Srpk1	361811	-0.0589541	13.3522	-1.10252	0.285349	0.598448	-5.53934
ENSRNOG00000000513	Mapk14	81649	-0.0941131	12.6568	-1.46554	0.160724	0.458551	-5.11262
ENSRNOG00000000515	Mapk13	29513	-0.353138	6.58625	-1.10511	0.284256	0.597734	-5.53665
ENSRNOG00000000519	Stk38	361813	0.190142	11.6902	2.19395	0.0421798	0.238463	-4.00212
ENSRNOG00000000520	Srsf3	361814	0.0729524	14.1595	1.7328	0.100931	0.365766	-4.73987
ENSRNOG00000000521	Cdkn1a	114851	0.25104	10.0992	0.444943	0.661881	0.862888	-6.03166
ENSRNOG00000000523	Ppil1	309651	-0.0600083	9.92655	-0.717886	0.482417	0.761343	-5.87495
ENSRNOG00000000524	RGD735065	294311	-0.0484177	13.099	-0.782582	0.44446	0.735487	-5.8276
ENSRNOG00000000529	Pim1	24649	-0.0814016	6.83974	-0.418706	0.680586	0.870219	-6.04296
ENSRNOG00000000532	Cmtr1	309656	-0.0761354	12.9	-1.36477	0.189824	0.49562	-5.24084
ENSRNOG00000000540	Btbd9	294318	-0.119331	12.7256	-1.82086	0.0859812	0.337451	-4.60752
ENSRNOG00000000541	Glo1	294320	0.0507555	13.9747	1.16916	0.258208	0.572116	-5.46853
ENSRNOG00000000543	Frk	79209	-0.141651	6.26647	-0.771204	0.450998	0.740809	-5.8362
ENSRNOG00000000547	Tspyl4	309828	-0.111936	14.4022	-1.3296	0.200928	0.508264	-5.28389
ENSRNOG00000000549	Tspyl1	29544	-0.0647798	13.9817	-1.50317	0.150841	0.445283	-5.06293
ENSRNOG00000000557	Sar1a	294504	-0.142963	13.8902	-2.08936	0.0517559	0.263958	-4.17853
ENSRNOG00000000559	Npffr1	64107	-0.099991	4.67935	-0.666423	0.513936	0.780195	-5.90986
ENSRNOG00000000562	Prf1	50669	0.345534	5.70992	1.70601	0.105905	0.374857	-4.77924
ENSRNOG00000000565	Sgpl1	286896	-0.174156	11.0698	-1.75637	0.0967227	0.357904	-4.70488
ENSRNOG00000000566	Pcbd1	29700	0.391046	11.2903	2.03567	0.0574061	0.279782	-4.26716
ENSRNOG00000000567	Unc5b	60630	-0.117658	12.3923	-0.955563	0.352465	0.663697	-5.68264
ENSRNOG00000000568	Slc29a3	353307	-0.127934	10.5705	-1.38929	0.182381	0.487646	-5.21031
ENSRNOG00000000569	Vsir	690899	0.160825	11.6824	1.92412	0.0709604	0.308715	-4.44687
ENSRNOG00000000571	Psap	25524	-0.0189219	14.9786	-0.244503	0.80972	0.927422	-6.10082
ENSRNOG00000000572	Chst3	84468	-0.605024	6.55144	-3.11049	0.00626262	0.0980218	-2.30092
ENSRNOG00000000585	Amd1	81640	0.0400112	13.4237	0.887764	0.386852	0.692668	-5.74259
ENSRNOG00000000588	Slc16a10	170566	-0.0712601	7.40535	-0.489401	0.630709	0.847824	-6.01098
ENSRNOG00000000590	Naglt1	337920	0.163809	6.82551	1.71028	0.105098	0.372832	-4.77299
ENSRNOG00000000593	Rev3l	309812	-0.0600996	12.0492	-0.728634	0.47598	0.757544	-5.86734
ENSRNOG00000000595	Traf3ip2	361857	0.0338989	9.46936	0.497529	0.625084	0.845902	-6.00699
ENSRNOG00000000596	Fyn	25150	-0.0125453	14.1104	-0.239644	0.813424	0.929349	-6.102
ENSRNOG00000000609	Ipmk	171458	-0.159605	11.2553	-2.43641	0.025921	0.185746	-3.57618
ENSRNOG00000000613	Tfam	83474	0.105209	12.2389	1.96204	0.0660614	0.297027	-4.38648
ENSRNOG00000000618	Mdga2	314180	0.0725883	10.7081	1.13707	0.271024	0.584215	-5.50307
ENSRNOG00000000632	Cdk1	54237	0.0470768	7.21376	0.273391	0.787792	0.916542	-6.09331
ENSRNOG00000000638	Zfp365	499425	-0.0919614	13.0676	-1.04587	0.310025	0.624184	-5.59671
ENSRNOG00000000640	Egr2	114090	-0.532604	8.97802	-1.27354	0.219683	0.53424	-5.35062
ENSRNOG00000000641	Nrbf2	58839	-0.126956	11.4941	-2.11212	0.0495176	0.256942	-4.14056
ENSRNOG00000000653	Nr5a2	60349	-0.0454574	5.96024	-0.34057	0.737531	0.896272	-6.07262
ENSRNOG00000000658	Acacb	116719	0.0604914	8.78063	0.652315	0.522777	0.785038	-5.91901
ENSRNOG00000000663	Tfip11	288718	-0.0390255	11.3757	-0.552454	0.587709	0.826008	-5.97838
ENSRNOG00000000664	Tpst2	288719	0.0410672	10.1865	0.498402	0.624482	0.845654	-6.00656
ENSRNOG00000000665	Pitpnb	114561	0.0110342	12.4345	0.224511	0.824992	0.934068	-6.10554
ENSRNOG00000000692	Ung	304577	-0.0274215	8.49153	-0.329681	0.745602	0.9002	-6.07628
ENSRNOG00000000693	Svop	171442	-0.0825291	14.0114	-1.19288	0.249029	0.563719	-5.44247
ENSRNOG00000000699	Selplg	363930	-0.842529	11.3234	-3.01813	0.00763973	0.108689	-2.48139
ENSRNOG00000000704	Cmklr1	60669	-0.305283	8.76412	-1.76088	0.0959348	0.356233	-4.69815
ENSRNOG00000000715	Pou1f1	25517	-0.220068	5.10961	-1.37503	0.186682	0.493744	-5.22812
ENSRNOG00000000716	Htr1f	60448	0.0719371	7.8285	0.426702	0.674862	0.867303	-6.03958
ENSRNOG00000000720	MGC95208	304176	-0.00978274	10.3718	-0.174527	0.863479	0.949149	-6.11557
ENSRNOG00000000723	RT1-CE5	309607	-0.0534227	8.98049	-0.278921	0.783614	0.915814	-6.09177
ENSRNOG00000000726	Olr1671	294138	-0.139217	4.77862	-1.23294	0.2341	0.548805	-5.39748
ENSRNOG00000000728	Clic2	294141	0.219958	7.5476	0.954901	0.35279	0.663924	-5.68325
ENSRNOG00000000729	Tmlhe	170898	0.021174	9.84695	0.254282	0.802278	0.924481	-6.09837
ENSRNOG00000000746	Olr1695	294159	-0.47818	5.59121	-3.13645	0.0059214	0.0956657	-2.24996
ENSRNOG00000000747	Olr1694	406008	-0.184663	5.20296	-0.894747	0.38321	0.689684	-5.7366
ENSRNOG00000000749	Olr1693	365523	-0.151992	5.78682	-1.24903	0.2283	0.542413	-5.37906
ENSRNOG00000000759	Olr1730	294187	-0.398175	4.94429	-3.5139	0.00260662	0.0695974	-1.50041
ENSRNOG00000000763	RT1-M3-1	24747	-0.00459058	11.7481	-0.0486204	0.961779	0.986093	-6.12973
ENSRNOG00000000765	Olr1743	294197	-0.00777972	6.862	-0.0343409	0.972999	0.991057	-6.13033
ENSRNOG00000000768	Ubd	29168	0.246404	5.86951	2.23639	0.0387813	0.228739	-3.92922
ENSRNOG00000000774	Gabbr1	81657	-0.0133454	13.3377	-0.151495	0.881339	0.954759	-6.11935
ENSRNOG00000000775	Mog	24558	0.103338	13.8157	0.84505	0.409625	0.710435	-5.77829
ENSRNOG00000000777	RT1-S3	294228	-0.0679	10.7503	-0.544341	0.593159	0.828434	-5.98279
ENSRNOG00000000779	Znrd1	361784	0.153359	10.3036	2.73802	0.0138637	0.13866	-3.01904
ENSRNOG00000000780	Ppp1r11	294207	0.102778	14.5975	2.81066	0.0118924	0.129257	-2.88122
ENSRNOG00000000781	Rnf39	171387	-0.358506	10.2426	-1.89251	0.075291	0.317509	-4.49667
ENSRNOG00000000782	Trim10	294210	0.0285965	7.0346	0.244409	0.809791	0.927422	-6.10084
ENSRNOG00000000783	Trim40	365528	0.41997	7.84372	3.17081	0.00549761	0.0917745	-2.18237
ENSRNOG00000000785	Trim39	309591	0.0354973	11.1321	0.593099	0.560794	0.810579	-5.95535
ENSRNOG00000000786	Rpp21	406230	0.147528	9.7129	1.94346	0.068423	0.30271	-4.41617
ENSRNOG00000000795	RT1-N3	24750	0.363113	7.51521	1.88059	0.0769827	0.321427	-4.51529
ENSRNOG00000000798	Gnl1	309593	0.0174366	13.2157	0.331708	0.744097	0.899509	-6.07561
ENSRNOG00000000800	Man1a1	294410	-0.0780033	11.6568	-0.760527	0.457187	0.744036	-5.84417
ENSRNOG00000000801	Msl3l2	309790	-0.275305	9.29776	-2.8365	0.0112584	0.126688	-2.83189
ENSRNOG00000000804	Mrps18b	294230	0.0987862	12.309	1.26088	0.224103	0.538082	-5.36537
ENSRNOG00000000805	Gja1	24392	0.0700561	15.4309	1.00582	0.328373	0.642892	-5.63566
ENSRNOG00000000808	Hsf2	64441	-0.014744	10.7256	-0.322256	0.751123	0.902907	-6.0787
ENSRNOG00000000809	Atat1	361789	-0.0149574	13.6672	-0.263021	0.795643	0.920763	-6.0961
ENSRNOG00000000811	Pkib	24678	-0.254987	8.50051	-1.10923	0.282525	0.596726	-5.53237
ENSRNOG00000000812	RGD1302996	294231	-0.113471	12.693	-1.87531	0.0777433	0.322335	-4.52353
ENSRNOG00000000814	Fabp7	80841	0.179496	14.109	3.49937	0.00269064	0.0700846	-1.52949
ENSRNOG00000000815	Smpdl3a	294422	0.163677	11.4849	1.85014	0.0814597	0.329014	-4.56255
ENSRNOG00000000818	Nrm	361791	0.0081157	7.82732	0.041971	0.967003	0.988787	-6.13003
ENSRNOG00000000825	Calhm5	294431	-0.290021	7.61923	-1.58188	0.131797	0.413377	-4.95596
ENSRNOG00000000826	Flot1	64665	-0.0562197	13.4934	-1.25005	0.227938	0.542092	-5.37789
ENSRNOG00000000827	Ier3	294235	0.0458957	9.11393	0.247791	0.807215	0.926252	-6.10001
ENSRNOG00000000831	Gtf2h4	294236	-0.0372329	11.1987	-0.811135	0.428314	0.72456	-5.8055
ENSRNOG00000000833	Vars2	309596	-0.153402	8.922	-2.49613	0.0229366	0.177174	-3.46803
ENSRNOG00000000838	Lta	25008	0.0198074	5.7405	0.232599	0.818804	0.931731	-6.10368
ENSRNOG00000000839	Nfkbil1	361794	0.0974492	10.2219	0.959841	0.350368	0.661423	-5.67873
ENSRNOG00000000840	Atp6v1g2	368044	-0.118549	14.883	-1.85432	0.0808317	0.327867	-4.55609
ENSRNOG00000000841	Ddx39b	114612	-0.0203687	13.1322	-0.248517	0.806663	0.925952	-6.09983
ENSRNOG00000000842	Ddah2	294239	0.0443984	12.3283	0.662451	0.516417	0.781182	-5.91246
ENSRNOG00000000843	Ly6g6c	294241	0.171137	8.23613	1.9319	0.06993	0.306329	-4.43455
ENSRNOG00000000844	Ly6g6d	415062	-0.00955156	6.20616	-0.0775919	0.939044	0.977458	-6.12788
ENSRNOG00000000846	Ly6g5c	294245	0.0915584	6.03527	0.668929	0.512375	0.778816	-5.90822
ENSRNOG00000000847	Csnk2b	81650	0.00458196	14.6126	0.0843203	0.93377	0.975419	-6.12734
ENSRNOG00000000848	Gpank1	415064	0.0935917	11.9117	1.36333	0.190271	0.496214	-5.24262
ENSRNOG00000000850	Apom	55939	0.0918578	7.87723	0.63745	0.532184	0.792745	-5.92844
ENSRNOG00000000851	Bag6	94342	-0.122613	13.1767	-2.48923	0.023264	0.177824	-3.48058
ENSRNOG00000000852	Prrc2a	294250	-0.179589	13.554	-2.13246	0.0475913	0.251046	-4.10641
ENSRNOG00000000853	Aif1	29427	0.366525	11.1784	4.38087	0.000392987	0.0353695	0.238692
ENSRNOG00000000854	Ncr3	294251	-0.0721561	5.57796	-0.399891	0.694134	0.875356	-6.05065
ENSRNOG00000000855	Lst1	64569	0.0792133	7.94314	0.704858	0.490286	0.766509	-5.88402
ENSRNOG00000000857	Msh5	294252	0.0916308	4.94675	0.832965	0.416224	0.7155	-5.78811
ENSRNOG00000000858	Sapcd1	406170	-0.289769	8.04172	-2.31155	0.0333764	0.214383	-3.79832
ENSRNOG00000000860	Vwa7	309611	0.230529	5.54003	1.11645	0.279508	0.593359	-5.52483
ENSRNOG00000000866	Rbmx	302855	0.0635817	12.0083	0.929168	0.365595	0.675358	-5.70645
ENSRNOG00000000869	Arhgef6	363509	-0.0868842	10.8602	-0.796236	0.436692	0.730441	-5.81712
ENSRNOG00000000871	Cd40lg	84349	0.240289	6.04684	1.70104	0.106851	0.375415	-4.78649
ENSRNOG00000000873	Brs3	260319	0.347724	6.10043	1.22141	0.238325	0.553504	-5.41055
ENSRNOG00000000875	Fhl1	25177	0.0912896	12.5946	1.2702	0.220843	0.535393	-5.35453
ENSRNOG00000000878	Slc44a4	294255	0.200433	10.0082	0.403694	0.691387	0.874393	-6.04912
ENSRNOG00000000886	Caln1	363909	-0.00401025	13.7607	-0.0300029	0.976408	0.991739	-6.13047
ENSRNOG00000000888	Sbds	288615	0.0388117	13.9699	0.697603	0.494701	0.768872	-5.889
ENSRNOG00000000893	Tmem248	288616	0.0815191	13.8108	1.0204	0.321608	0.636987	-5.62164
ENSRNOG00000000897	Rxfp2	363866	0.284223	6.17361	1.26746	0.221797	0.536183	-5.35772
ENSRNOG00000000900	Tpst1	288617	-0.0685923	12.125	-1.36776	0.188906	0.49558	-5.23714
ENSRNOG00000000901	Crcp	114205	0.142206	12.3585	2.08836	0.0518566	0.264048	-4.18019
ENSRNOG00000000902	Hsph1	288444	0.0522076	14.5763	1.09191	0.289854	0.604306	-5.55028
ENSRNOG00000000903	Asl	59085	0.145963	10.7914	2.6176	0.0178397	0.154593	-3.24462
ENSRNOG00000000907	Alox5ap	29624	0.172034	10.1876	2.09654	0.0510402	0.261564	-4.16658
ENSRNOG00000000913	Gusb	24434	0.0628224	9.34037	0.541423	0.595125	0.829225	-5.98436
ENSRNOG00000000920	Phkg1	29353	0.127835	10.5354	1.00885	0.326957	0.642009	-5.63276
ENSRNOG00000000921	Ubl3	363869	-0.0471842	14.6208	-0.690278	0.499182	0.770435	-5.89398
ENSRNOG00000000922	Sumf2	360800	0.112376	11.051	0.802332	0.433252	0.728516	-5.81239
ENSRNOG00000000923	Cct6a	288620	-0.137519	13.3586	-2.18453	0.0429703	0.24009	-4.0182
ENSRNOG00000000924	Slc7a1	25648	-0.348397	10.3496	-2.13547	0.047313	0.25027	-4.10136
ENSRNOG00000000925	Psph	304429	0.110183	11.2174	1.81522	0.0868769	0.339054	-4.61613
ENSRNOG00000000931	Sfswap	304431	0.0900293	11.9565	1.59451	0.12894	0.408829	-4.93842
ENSRNOG00000000936	Stx2	25130	0.125639	10.7117	1.65838	0.115272	0.389911	-4.84817
ENSRNOG00000000937	Slc46a3	288454	0.0478291	10.9156	0.439445	0.665783	0.86414	-6.03408
ENSRNOG00000000938	Ran	84509	-0.0538369	14.0334	-1.20951	0.242747	0.556384	-5.42395
ENSRNOG00000000940	Flt1	54251	-0.0466341	12.0616	-0.846339	0.408926	0.709738	-5.77724
ENSRNOG00000000954	Polr1d	360762	-0.0259602	13.2991	-0.469013	0.64492	0.854431	-6.0207
ENSRNOG00000000956	Rasl11a	304268	0.288292	8.74897	1.91999	0.0715135	0.309527	-4.45341
ENSRNOG00000000957	Rpl21	79449	0.0907207	13.7764	1.9394	0.0689484	0.303845	-4.42262
ENSRNOG00000000962	Slc15a4	246280	-0.0965247	10.3077	-1.65196	0.116587	0.391581	-4.85735
ENSRNOG00000000967	Aacs	65984	-0.124146	11.9129	-2.90469	0.00973856	0.119316	-2.70106
ENSRNOG00000000969	Cyp3a18	252931	0.100248	4.65713	1.37237	0.187493	0.494654	-5.23143
ENSRNOG00000000979	Bri3bp	498176	-0.122793	10.5726	-1.84073	0.0828902	0.332118	-4.57706
ENSRNOG00000000981	Scarb1	25073	0.000475166	12.44	0.00908006	0.992859	0.997989	-6.13088
ENSRNOG00000000983	Zfp394	252860	0.00554142	11.1699	0.111177	0.912756	0.965212	-6.12469
ENSRNOG00000000985	Cpsf4	304277	0.128019	12.516	2.34269	0.0313488	0.206323	-3.74343
ENSRNOG00000000988	Xab2	245976	-0.0128939	11.0935	-0.213721	0.833265	0.937189	-6.10791
ENSRNOG00000000989	Bud31	89819	0.0526466	12.9806	1.09522	0.288444	0.60304	-5.54688
ENSRNOG00000000990	Pdap1	64527	0.057239	13.7419	1.23216	0.234385	0.549085	-5.39837
ENSRNOG00000000991	Arpc1b	54227	0.0921669	10.5694	1.09407	0.288935	0.603558	-5.54806
ENSRNOG00000000994	Stxbp2	81804	0.119114	9.21783	0.586736	0.564965	0.812622	-5.95906
ENSRNOG00000000996	Arpc1a	81824	-0.0476044	13.606	-0.55839	0.583738	0.823471	-5.97511
ENSRNOG00000001001	Retn	246250	-0.114117	4.65723	-1.17643	0.255369	0.570081	-5.46059
ENSRNOG00000001005	Fcer2	171075	-0.0865762	5.65632	-0.658091	0.519147	0.783488	-5.91529
ENSRNOG00000001006	Nptx2	288475	-0.060277	11.0163	-0.444871	0.661932	0.862888	-6.03169
ENSRNOG00000001007	Baiap2l1	304282	0.168805	8.57565	0.364367	0.720003	0.887503	-6.06422
ENSRNOG00000001009	Bri3	304284	0.022582	13.588	0.301289	0.766787	0.909761	-6.08526
ENSRNOG00000001010	Tecpr1	304285	-0.347658	12.0731	-3.99037	0.000919503	0.0449472	-0.543247
ENSRNOG00000001031	Ocm2	25503	0.516921	6.09419	1.8807	0.0769667	0.321427	-4.51512
ENSRNOG00000001032	Ccz1b	360768	0.0258929	11.8939	0.44623	0.66097	0.862888	-6.03108
ENSRNOG00000001033	Nufip1	364430	-0.017818	10.7829	-0.25551	0.801344	0.92427	-6.09806
ENSRNOG00000001035	Gtf2h3	288651	-0.0273014	10.1638	-0.438849	0.666206	0.864237	-6.03434
ENSRNOG00000001036	Rsph10b	288478	-0.0314654	12.8281	-0.145432	0.886052	0.955585	-6.12026
ENSRNOG00000001037	Gpalpp1	298712	0.184176	11.712	3.26382	0.00449414	0.0828072	-1.99866
ENSRNOG00000001039	Eif2b1	64514	0.0510069	11.3917	0.83963	0.412577	0.712943	-5.78271
ENSRNOG00000001044	Aimp2	288480	-0.0164293	12.7962	-0.291888	0.773846	0.911667	-6.08806
ENSRNOG00000001047	Map2k7	363855	-0.16729	12.8248	-2.46155	0.0246227	0.182507	-3.5308
ENSRNOG00000001048	Ankrd61	689907	0.00444587	6.72373	0.0331671	0.973921	0.9915	-6.13037
ENSRNOG00000001049	Tpt1	116646	0.0985648	14.7788	2.2278	0.0394474	0.230107	-3.94402
ENSRNOG00000001050	Eif2ak1	27137	-0.050821	12.2765	-0.927328	0.366522	0.676154	-5.70809
ENSRNOG00000001052	Slc25a30	361074	-0.129212	10.534	-1.02471	0.319626	0.634725	-5.61746
ENSRNOG00000001053	Tmed2	65165	0.0602955	14.2633	1.2615	0.223883	0.538082	-5.36464
ENSRNOG00000001056	Snapc2	304204	0.0867081	12.9906	1.92461	0.0708962	0.308589	-4.44611
ENSRNOG00000001058	Timm44	29635	0.0477187	11.2688	0.794165	0.437865	0.731135	-5.81872
ENSRNOG00000001060	Snrnp35	360803	0.136913	12.2498	2.40041	0.0278926	0.19283	-3.6408
ENSRNOG00000001061	Rilpl2	288652	1.5499e-05	12.114	0.00020531	0.999839	0.99995	-6.13092
ENSRNOG00000001065	Cyth3	116693	-0.0570995	11.6497	-1.00274	0.329814	0.644672	-5.6386
ENSRNOG00000001068	Rac1	363875	-0.0479492	14.5697	-0.844161	0.410109	0.710648	-5.77902
ENSRNOG00000001080	Arl6ip4	288656	0.116563	12.2463	1.91136	0.0726808	0.311982	-4.46703
ENSRNOG00000001082	Abcb9	63886	-0.225961	10.3246	-3.87294	0.00118864	0.0519729	-0.779363
ENSRNOG00000001083	Kdelr2	304290	0.0857604	12.7516	1.08887	0.291159	0.605905	-5.5534
ENSRNOG00000001088	Rfc3	288414	0.167899	10.9289	2.22206	0.0398988	0.2319	-3.9539
ENSRNOG00000001092	Kl	83504	0.251985	9.4037	0.262986	0.79567	0.920763	-6.09611
ENSRNOG00000001108	N4bp2l2	288416	0.0124622	12.1803	0.18053	0.858836	0.947293	-6.1145
ENSRNOG00000001111	Brca2	360254	0.108259	10.1581	1.64155	0.118747	0.394957	-4.87219
ENSRNOG00000001113	Mmd2	304301	0.0811559	14.3016	1.82588	0.0851912	0.336249	-4.59985
ENSRNOG00000001114	Wipi2	288498	-0.374394	11.777	-3.53381	0.00249566	0.0685512	-1.46054
ENSRNOG00000001130	Nos1	24598	-0.372427	7.04146	-2.30997	0.0334819	0.214466	-3.80108
ENSRNOG00000001135	Wsb2	288692	0.00671634	14.3463	0.128802	0.899001	0.960521	-6.12256
ENSRNOG00000001136	Pebp1	29542	-0.0502127	14.3963	-0.874207	0.393987	0.698256	-5.75409
ENSRNOG00000001138	Taok3	304530	0.0865603	13.5671	1.89958	0.0743015	0.31622	-4.48556
ENSRNOG00000001142	Prkab1	83803	0.124305	11.6208	1.85126	0.0812914	0.328721	-4.56082
ENSRNOG00000001143	Cit	83620	0.0576843	11.5783	0.205262	0.839765	0.939821	-6.1097
ENSRNOG00000001148	Rplp0	64205	-0.123447	14.1247	-2.05273	0.0555533	0.273949	-4.23915
ENSRNOG00000001149	Pxn	360820	-0.218003	11.182	-3.05219	0.00710066	0.104289	-2.415
ENSRNOG00000001152	Glp1r	25051	-0.0576091	6.88077	-0.329342	0.745853	0.900389	-6.07639
ENSRNOG00000001153	Pla2g1b	29526	0.147608	9.70653	1.16497	0.259856	0.573178	-5.47309
ENSRNOG00000001156	Msi1	259272	-0.50828	11.4546	-2.31783	0.0329575	0.212695	-3.78727
ENSRNOG00000001158	Abcg1	85264	-0.0853431	12.2242	-1.54482	0.140496	0.429096	-5.00683
ENSRNOG00000001159	Tff3	25563	0.324773	5.32532	1.59694	0.128394	0.408223	-4.93503
ENSRNOG00000001162	Tff2	116592	-0.201375	6.49242	-1.43894	0.168027	0.467492	-5.14716
ENSRNOG00000001163	Srsf9	288701	0.159242	11.4903	1.83995	0.0830096	0.332457	-4.57826
ENSRNOG00000001164	Tff1	117270	0.0227373	5.7287	0.164429	0.8713	0.95162	-6.11729
ENSRNOG00000001169	Slc37a1	294321	0.0958627	10.6301	0.844138	0.410121	0.710648	-5.77904
ENSRNOG00000001170	Cox6a1	25282	0.0345214	14.8599	0.617773	0.544778	0.801485	-5.94061
ENSRNOG00000001171	Coq5	304542	-0.0473128	10.6019	-0.691587	0.49838	0.769977	-5.8931
ENSRNOG00000001172	Rnf10	288710	-0.0176079	13.8261	-0.313532	0.757628	0.904749	-6.08148
ENSRNOG00000001173	Cabp1	171051	0.0619844	13.068	0.692019	0.498115	0.769977	-5.8928
ENSRNOG00000001174	Pde9a	191569	-0.0203249	11.6224	-0.184194	0.856005	0.945802	-6.11383
ENSRNOG00000001177	Acads	64304	-0.0732046	7.50862	-0.601858	0.55508	0.807543	-5.95018
ENSRNOG00000001182	Ndufv3	64539	-0.0473021	12.4634	-0.677806	0.506865	0.776135	-5.90235
ENSRNOG00000001183	Hnf1a	24817	0.224254	7.52687	1.4605	0.162087	0.4601	-5.1192
ENSRNOG00000001184	Pknox1	294322	-0.145296	8.6581	-2.06802	0.0539379	0.270029	-4.21391
ENSRNOG00000001185	RGD1311899	288704	-0.0712951	13.0872	-1.39666	0.180189	0.484914	-5.20104
ENSRNOG00000001187	Oasl	304545	-0.108764	5.91867	-0.546631	0.591618	0.828092	-5.98155
ENSRNOG00000001189	Sik1	59329	0.117151	9.89967	0.554814	0.586129	0.825012	-5.97708
ENSRNOG00000001190	Git2	304546	-0.0214216	12.5798	-0.330349	0.745106	0.899747	-6.07606
ENSRNOG00000001195	Trpv4	66026	0.237984	6.94879	0.397757	0.695678	0.875676	-6.0515
ENSRNOG00000001201	Cstb	25308	0.0360628	11.8448	0.472032	0.642807	0.854178	-6.01928
ENSRNOG00000001203	Rrp1	309674	0.00858548	12.3967	0.160697	0.874195	0.951969	-6.11791
ENSRNOG00000001204	Ankrd13a	360823	-0.0553476	12.0138	-0.679654	0.505723	0.775008	-5.90112
ENSRNOG00000001211	Gatd3a	294326	-0.00325068	12.4656	-0.0622258	0.951097	0.981963	-6.12897
ENSRNOG00000001212	Dnmt3l	309680	0.00832439	5.62296	0.0667184	0.947571	0.980522	-6.12868
ENSRNOG00000001214	Pfkl	25741	-0.139513	14.0444	-1.70892	0.105354	0.373293	-4.77498
ENSRNOG00000001215	Cfap410	309681	-0.0500516	11.6421	-0.762102	0.456271	0.743664	-5.843
ENSRNOG00000001216	Trpm2	294329	-0.0696259	10.3938	-0.775579	0.448477	0.739088	-5.83291
ENSRNOG00000001217	Lrrc3	246773	0.231053	6.19887	1.07913	0.295354	0.610314	-5.56334
ENSRNOG00000001223	Pttg1ip	365548	0.0888782	11.5709	1.44623	0.166	0.465494	-5.13774
ENSRNOG00000001225	Fam207a	294333	0.0857452	10.3816	1.20831	0.243198	0.556933	-5.4253
ENSRNOG00000001227	Adarb1	25367	0.123906	12.9456	1.44	0.167731	0.467173	-5.14579
ENSRNOG00000001232	Slc19a1	29723	0.0174383	11.1125	0.0872547	0.931472	0.974406	-6.12708
ENSRNOG00000001235	Gna12	81663	0.0210987	13.1559	0.250777	0.804943	0.925762	-6.09926
ENSRNOG00000001237	Cabin1	94165	-0.353276	12.508	-3.75977	0.00152256	0.057808	-1.00694
ENSRNOG00000001238	Rsrc2	360807	0.0739891	12.8945	1.21179	0.241893	0.555591	-5.42138
ENSRNOG00000001239	Ddt	29318	0.00307055	13.2274	0.0349841	0.972493	0.991057	-6.1303
ENSRNOG00000001245	Pcbp3	294336	-0.271363	13.7812	-3.64625	0.00195183	0.062016	-1.23506
ENSRNOG00000001247	Clip1	65201	-0.00907642	13.1331	-0.149741	0.882702	0.955134	-6.11962
ENSRNOG00000001250	Lfng	170905	0.0544564	11.3978	0.532555	0.60112	0.831311	-5.98908
ENSRNOG00000001251	Grifin	117130	0.355394	9.64547	1.93035	0.0701342	0.30666	-4.43701
ENSRNOG00000001252	Chst12	304322	-0.284964	10.2584	-4.19451	0.000589074	0.0387169	-0.133599
ENSRNOG00000001253	Eif3b	288516	-0.0589774	13.3648	-1.26134	0.223941	0.538082	-5.36483
ENSRNOG00000001260	Nudt1	117260	0.153609	9.57839	1.95325	0.0671698	0.299328	-4.40055
ENSRNOG00000001261	Ftcd	89833	0.417729	5.89371	2.53535	0.0211567	0.170864	-3.39639
ENSRNOG00000001269	Ppp1cc	24669	0.00804363	14.2126	0.164547	0.871209	0.95162	-6.11728
ENSRNOG00000001275	Tmem184a	304325	-0.0395164	5.79137	-0.107683	0.915487	0.966595	-6.12507
ENSRNOG00000001277	Mafk	246760	-0.145656	10.7643	-1.75136	0.0976039	0.359074	-4.71234
ENSRNOG00000001278	Gpn3	360810	-0.0744999	11.833	-1.21221	0.241737	0.555591	-5.42091
ENSRNOG00000001284	Uncx	29375	0.0473311	4.85709	0.244552	0.809682	0.927422	-6.10081
ENSRNOG00000001287	Gper1	171104	-0.167737	7.97371	-1.32992	0.200826	0.508264	-5.28351
ENSRNOG00000001289	LOC498154	498154	0.162027	10.887	1.62359	0.122554	0.400562	-4.89764
ENSRNOG00000001294	Ift81	373066	0.18927	12.5765	2.66314	0.0162224	0.149746	-3.15976
ENSRNOG00000001295	S100b	25742	0.115215	14.63	1.9131	0.0724438	0.311645	-4.46429
ENSRNOG00000001296	P2rx7	29665	-0.0753179	9.3747	-0.399852	0.694163	0.875356	-6.05066
ENSRNOG00000001297	Prmt2	499420	0.0296037	12.577	0.57001	0.576004	0.818937	-5.96863
ENSRNOG00000001299	Sun1	360773	0.0144614	12.3985	0.287948	0.77681	0.913119	-6.0892
ENSRNOG00000001300	P2rx4	29659	0.164671	12.2912	1.94526	0.0681909	0.302378	-4.4133
ENSRNOG00000001302	Adora2a	25369	0.386799	9.78747	2.84355	0.0110912	0.125859	-2.81841
ENSRNOG00000001303	Specc1l	361828	-0.0614555	12.1775	-1.1777	0.254874	0.569493	-5.4592
ENSRNOG00000001309	Camkk2	83506	-0.164813	11.1305	-1.97455	0.0645126	0.294365	-4.3664
ENSRNOG00000001312	Pdgfa	25266	0.0525091	10.7327	1.05637	0.305337	0.62093	-5.58627
ENSRNOG00000001313	Gnaz	25740	-0.2214	12.3822	-3.30211	0.0041355	0.0817835	-1.92273
ENSRNOG00000001314	Fam20c	304334	0.0984524	12.3193	1.36475	0.189831	0.49562	-5.24086
ENSRNOG00000001316	Anapc5	288671	0.0602821	14.0169	1.32518	0.202359	0.510109	-5.28924
ENSRNOG00000001325	Il3ra	246144	0.0981698	9.07056	1.26004	0.224399	0.538107	-5.36635
ENSRNOG00000001331	Rnf34	282845	0.0655448	12.8944	1.54151	0.141296	0.430436	-5.01133
ENSRNOG00000001333	Azgp1	25294	0.11881	5.42553	0.885978	0.387787	0.693807	-5.74411
ENSRNOG00000001335	Zkscan1	498160	-0.124751	11.6809	-2.44211	0.0256208	0.184733	-3.5659
ENSRNOG00000001336	Orai1	304496	-0.024573	9.61795	-0.207907	0.837731	0.938668	-6.10915
ENSRNOG00000001338	Hpd	29531	0.282929	9.03468	1.75613	0.0967653	0.357923	-4.70524
ENSRNOG00000001339	Psmd9	161475	-0.00350381	12.3231	-0.0758086	0.940442	0.977461	-6.12802
ENSRNOG00000001344	Aldh2	29539	0.0703844	13.4889	0.612461	0.548205	0.803773	-5.94383
ENSRNOG00000001345	Mapkapk5	498183	0.041089	13.3508	0.556211	0.585194	0.824118	-5.97632
ENSRNOG00000001347	Adam1a	56777	0.245354	10.2171	2.40661	0.027543	0.190938	-3.62969
ENSRNOG00000001348	Erp29	117030	0.0260913	11.9621	0.346207	0.733365	0.894489	-6.07068
ENSRNOG00000001349	Mcm7	288532	-0.0347547	10.7525	-0.434434	0.669347	0.864984	-6.03626
ENSRNOG00000001350	Naa25	360811	-0.0862323	11.5605	-1.73855	0.0998896	0.363554	-4.73136
ENSRNOG00000001353	Ap4m1	304344	-0.0659745	9.64172	-1.10541	0.284128	0.597597	-5.53634
ENSRNOG00000001355	Taf6	288533	-0.133906	12.6199	-1.79526	0.0901133	0.345335	-4.64645
ENSRNOG00000001357	Mblac1	304346	0.0722933	8.39009	0.673134	0.509761	0.777311	-5.90545
ENSRNOG00000001360	Stag3	114522	-0.441169	6.00465	-2.26257	0.0368122	0.222507	-3.88386
ENSRNOG00000001367	Gpc2	171517	-0.381445	6.95741	-4.42629	0.000356182	0.0351618	0.329094
ENSRNOG00000001368	Rph3a	171039	-0.107329	14.0294	-1.65661	0.115634	0.390444	-4.85071
ENSRNOG00000001369	Oas1a	192281	0.0136285	8.8452	0.0843017	0.933785	0.975419	-6.12734
ENSRNOG00000001376	Mettl7a	315306	0.0936341	12.6102	0.996458	0.332771	0.646813	-5.64458
ENSRNOG00000001379	Cyp3a62	170509	-0.156575	6.76707	-1.41578	0.174604	0.477193	-5.17683
ENSRNOG00000001383	Slc8b1	498185	0.100941	10.0921	1.06196	0.302862	0.619159	-5.58068
ENSRNOG00000001385	Plbd2	246120	-0.115479	12.5987	-1.55776	0.137407	0.423596	-4.98917
ENSRNOG00000001388	Sds	25044	0.293084	7.9398	2.48575	0.0234311	0.178676	-3.48692
ENSRNOG00000001389	Irs3	84021	0.0694984	8.10656	0.605197	0.55291	0.806991	-5.94819
ENSRNOG00000001392	Lhx5	124451	0.458148	7.30553	2.47355	0.0240246	0.179944	-3.50905
ENSRNOG00000001396	Mospd3	288557	0.0976341	11.8711	1.55091	0.139035	0.426057	-4.99854
ENSRNOG00000001399	Tbx5	304514	0.0415523	5.75625	0.332539	0.74348	0.899005	-6.07533
ENSRNOG00000001409	Gnb2	81667	-0.0509617	14.6097	-1.13501	0.271864	0.585497	-5.50526
ENSRNOG00000001412	Epo	24335	-0.174473	5.56467	-1.72042	0.103203	0.369624	-4.75811
ENSRNOG00000001414	Serpine1	24617	-0.144335	7.95161	-1.00995	0.326446	0.641717	-5.63171
ENSRNOG00000001416	Vgf	29461	-0.917707	9.16429	-2.52326	0.021691	0.172155	-3.41853
ENSRNOG00000001417	Plod3	288583	-0.123938	13.0726	-1.64392	0.118252	0.394119	-4.86882
ENSRNOG00000001425	Sh2b2	114203	-0.0709247	8.20158	-0.590929	0.562215	0.810948	-5.95662
ENSRNOG00000001429	Lrwd1	304396	-0.130511	10.5082	-1.67157	0.112609	0.386251	-4.82922
ENSRNOG00000001434	Zp3	114639	-0.0709643	5.57755	-0.746797	0.465221	0.749069	-5.85426
ENSRNOG00000001436	Ywhag	56010	-0.170199	15.2	-2.74817	0.0135705	0.13761	-2.99986
ENSRNOG00000001440	Mdh2	81829	-0.0550863	14.4441	-1.19796	0.2471	0.561169	-5.43684
ENSRNOG00000001441	Tmem120a	288591	0.163772	12.0372	2.37167	0.0295664	0.199805	-3.69205
ENSRNOG00000001442	Por	29441	-0.0311552	13.9791	-0.499615	0.623645	0.845242	-6.00596
ENSRNOG00000001449	Pom121	113975	-0.270723	13.1467	-3.11914	0.00614688	0.0967674	-2.28396
ENSRNOG00000001452	Fzd9	266608	-0.0493757	11.3015	-0.499855	0.623479	0.845242	-6.00584
ENSRNOG00000001454	Eif4h	288599	-0.0581978	13.6746	-0.970384	0.345236	0.658159	-5.66901
ENSRNOG00000001457	Rfc2	116468	-0.0442446	11.96	-0.74026	0.469077	0.752685	-5.859
ENSRNOG00000001469	Eln	25043	-0.119857	9.75142	-1.39153	0.181711	0.487057	-5.20749
ENSRNOG00000001470	Limk1	65172	0.125093	12.1826	0.770561	0.45137	0.74083	-5.83668
ENSRNOG00000001476	Cldn4	304407	0.417697	6.92874	0.969262	0.34578	0.658273	-5.67005
ENSRNOG00000001478	Gtf2ird1	246770	0.208145	12.3231	1.45048	0.164826	0.463517	-5.13223
ENSRNOG00000001479	Gtf2i	353256	-0.161206	13.1111	-3.28626	0.00428037	0.0822978	-1.95417
ENSRNOG00000001480	Ncf1	114553	-0.56375	8.30011	-2.88446	0.0101673	0.120541	-2.73996
ENSRNOG00000001488	Psmb1	94198	0.0601095	13.1507	1.05541	0.305763	0.62093	-5.58722
ENSRNOG00000001489	Tbp	117526	0.0676325	12.359	1.32534	0.202306	0.510109	-5.28904
ENSRNOG00000001492	Slc8a2	140447	-0.417672	9.47072	-3.29011	0.0042447	0.0822368	-1.94653
ENSRNOG00000001494	Napa	140673	-0.159303	13.894	-2.00803	0.0605274	0.286195	-4.31227
ENSRNOG00000001499	Mia	81510	0.0600568	6.49374	0.387107	0.703401	0.879534	-6.05568
ENSRNOG00000001500	Rab4b	50866	-0.176811	11.14	-2.23154	0.0391562	0.229703	-3.93758
ENSRNOG00000001501	Snrpa	292729	0.0182791	9.93333	0.257259	0.800016	0.923623	-6.09761
ENSRNOG00000001506	Tmem35a	308134	-0.203167	12.8196	-1.87163	0.0782765	0.322861	-4.52925
ENSRNOG00000001514	Cdca7	311742	-0.147082	9.01393	-1.66792	0.113341	0.387633	-4.83447
ENSRNOG00000001517	Pdk1	116551	0.165129	12.1135	2.59088	0.0188586	0.159815	-3.29413
ENSRNOG00000001524	Hat1	296501	0.0785184	10.9211	1.01572	0.323768	0.638928	-5.62616
ENSRNOG00000001525	Igsf11	303926	-0.0428123	12.8929	-0.499719	0.623573	0.845242	-6.0059
ENSRNOG00000001527	Cd80	25408	0.0785722	7.79504	0.710201	0.487049	0.764913	-5.88031
ENSRNOG00000001528	Gap43	29423	0.233705	13.824	1.72829	0.101754	0.366982	-4.74653
ENSRNOG00000001531	Chac2	360994	0.0252357	9.95721	0.276959	0.785096	0.915908	-6.09232
ENSRNOG00000001544	Cyyr1	304138	-0.218591	12.3881	-1.90005	0.0742363	0.316184	-4.48483
ENSRNOG00000001547	Agps	84114	-0.0546104	10.7317	-0.709165	0.487676	0.764994	-5.88103
ENSRNOG00000001548	Nfe2l2	83619	0.123419	11.9808	1.45685	0.163081	0.461273	-5.12396
ENSRNOG00000001551	Atp5pf	94271	-0.0421702	13.017	-0.8035	0.432595	0.728516	-5.81148
ENSRNOG00000001555	Btg3	54230	-0.00936848	11.5123	-0.113579	0.91088	0.964944	-6.12442
ENSRNOG00000001557	Cxadr	89843	-0.181673	9.28911	-2.32382	0.032563	0.21115	-3.77672
ENSRNOG00000001559	Mtx2	288150	0.0103109	11.6714	0.135375	0.893879	0.958755	-6.12168
ENSRNOG00000001571	Cldn8	304124	0.208283	6.31932	1.66285	0.114363	0.388992	-4.84176
ENSRNOG00000001575	Grik1	29559	-0.0900552	11.6127	-0.922647	0.368889	0.677958	-5.71224
ENSRNOG00000001584	Map3k7cl	304131	-0.141331	9.20923	-1.59247	0.129397	0.409498	-4.94126
ENSRNOG00000001593	Lnpk	362151	-0.0828893	11.3541	-1.46871	0.159871	0.457077	-5.10847
ENSRNOG00000001597	Atf2	81647	-0.217975	14.0018	-4.14146	0.00066124	0.0393934	-0.239916
ENSRNOG00000001607	Adamts1	79252	0.0774882	10.5508	0.269663	0.790612	0.918366	-6.09432
ENSRNOG00000001611	Rpl24	64307	0.146962	13.5285	2.89777	0.00988322	0.120131	-2.71438
ENSRNOG00000001621	C2cd2	304055	-0.42544	8.46404	-3.19448	0.0052231	0.0898676	-2.13572
ENSRNOG00000001622	Impg2	245919	0.043442	5.99062	0.35471	0.727097	0.890719	-6.0677
ENSRNOG00000001628	Pcp4	25510	0.378488	14.3558	4.28764	0.00048108	0.0363941	0.0526916
ENSRNOG00000001629	Wrb	288233	-0.131113	13.3596	-2.73226	0.0140328	0.139131	-3.02992
ENSRNOG00000001633	Tfg	360709	0.110951	13.3825	2.38049	0.0290431	0.197179	-3.67636
ENSRNOG00000001640	Tomm70	304017	-0.0912421	13.0014	-2.05469	0.0553438	0.273477	-4.23592
ENSRNOG00000001652	Erg	170909	0.111725	9.86525	1.74009	0.0996127	0.362894	-4.72908
ENSRNOG00000001653	St3gal6	304023	-0.00465033	11.115	-0.0269425	0.978814	0.991926	-6.13055
ENSRNOG00000001654	Cpox	304024	-0.0526771	13.1282	-0.558129	0.583912	0.823473	-5.97526
ENSRNOG00000001656	Kcnj15	170847	-0.00688589	7.00606	-0.0388755	0.969435	0.989847	-6.13016
ENSRNOG00000001657	Cldnd1	288182	-0.140478	13.1808	-2.04639	0.0562356	0.276024	-4.24958
ENSRNOG00000001662	Dyrk1a	25255	-0.0990658	13.3079	-2.08067	0.0526353	0.266424	-4.19297
ENSRNOG00000001679	Gabrr3	192258	-0.387826	7.0727	-2.94853	0.00886832	0.114543	-2.61645
ENSRNOG00000001691	Cldn14	304073	0.190606	8.73147	1.35353	0.193319	0.500714	-5.25469
ENSRNOG00000001692	Chaf1b	288242	-0.0634387	7.0998	-0.393972	0.698418	0.876803	-6.053
ENSRNOG00000001700	Whrn	313255	0.131087	12.4774	1.15836	0.26247	0.575538	-5.48025
ENSRNOG00000001704	Runx1	50662	0.164127	10.4921	1.65201	0.116578	0.391581	-4.85729
ENSRNOG00000001706	Kalrn	84009	-0.00333366	12.4598	-0.0667497	0.947547	0.980522	-6.12867
ENSRNOG00000001709	Ap2m1	116563	-0.138403	14.7515	-2.63982	0.0170324	0.151563	-3.2033
ENSRNOG00000001710	Abcf3	287982	-0.00613272	13.4917	-0.115476	0.909398	0.964944	-6.1242
ENSRNOG00000001715	Ece2	408243	-0.0377823	11.8684	-0.434831	0.669064	0.864984	-6.03609
ENSRNOG00000001717	Opa1	171116	-0.0323481	13.4004	-0.655035	0.521066	0.784645	-5.91726
ENSRNOG00000001719	Psmd2	287984	-0.199855	13.875	-4.61519	0.000236999	0.0322725	0.703362
ENSRNOG00000001720	Hes1	29577	-0.0231028	10.9368	-0.166896	0.869389	0.950567	-6.11688
ENSRNOG00000001727	Lsg1	288029	0.0579692	12.8304	1.25712	0.225427	0.539179	-5.36972
ENSRNOG00000001728	LOC100909474	288031	-0.319384	7.8631	-3.43991	0.00306347	0.0731666	-1.64835
ENSRNOG00000001730	Acap2	619382	-0.235949	11.5474	-2.36636	0.029886	0.200756	-3.7015
ENSRNOG00000001733	Ppp1r2	192361	-0.0401325	13.143	-0.647985	0.525507	0.787328	-5.92178
ENSRNOG00000001736	Bdh1	117099	-0.00874931	12.358	-0.147682	0.884302	0.955134	-6.11993
ENSRNOG00000001742	LOC108348101	29232	-0.040559	11.8026	-0.63074	0.53646	0.795881	-5.93263
ENSRNOG00000001752	Nrros	303875	-0.0578842	10.1213	-0.333932	0.742447	0.898558	-6.07486
ENSRNOG00000001762	Pcyt1a	140544	-0.164955	9.81137	-2.28051	0.0355177	0.219579	-3.85264
ENSRNOG00000001769	Tnk2	303882	-0.162385	13.2004	-1.68903	0.109167	0.37964	-4.80398
ENSRNOG00000001770	Ehhadh	171142	-0.0136767	9.76945	-0.144224	0.886991	0.955853	-6.12044
ENSRNOG00000001773	Senp2	78973	0.00179109	13.4011	0.0341182	0.973174	0.991057	-6.13033
ENSRNOG00000001783	Tra2b	117259	0.069928	13.643	1.58854	0.130284	0.411486	-4.94672
ENSRNOG00000001789	Zfp148	58820	0.136909	12.804	2.12004	0.0487594	0.254742	-4.12728
ENSRNOG00000001792	Slc12a8	266733	-0.172093	6.20971	-0.998543	0.331788	0.645429	-5.6426
ENSRNOG00000001796	Dgkg	25666	-0.376087	13.067	-2.45864	0.0247695	0.182742	-3.53605
ENSRNOG00000001797	Umps	288051	-0.0463886	11.3517	-0.581191	0.568612	0.814794	-5.96226
ENSRNOG00000001803	Dnajb11	360734	-0.0603185	13.5944	-1.21149	0.242007	0.555591	-5.42173
ENSRNOG00000001804	Itpr2	81678	0.0459901	11.391	0.488612	0.631256	0.847958	-6.01136
ENSRNOG00000001806	Fetub	83928	0.467282	6.14165	2.24767	0.0379215	0.2262	-3.90971
ENSRNOG00000001809	Hrg	171016	0.0801986	6.07918	0.448849	0.659116	0.861232	-6.02992
ENSRNOG00000001811	Fgfr1op2	362463	-0.00942934	12.3141	-0.10911	0.914371	0.965845	-6.12492
ENSRNOG00000001813	Dnm1l	114114	-0.135454	13.3288	-2.03846	0.0570988	0.278825	-4.26259
ENSRNOG00000001815	Eif4a2	303831	-0.107983	13.9873	-1.78117	0.0924601	0.348627	-4.66771
ENSRNOG00000001817	Tm7sf3	297725	0.059455	13.0345	1.15523	0.263712	0.576341	-5.48362
ENSRNOG00000001821	Adipoq	246253	-0.174006	8.19873	-0.340186	0.737815	0.896272	-6.07275
ENSRNOG00000001823	St6gal1	25197	-0.159704	11.4988	-1.21243	0.241656	0.555591	-5.42067
ENSRNOG00000001827	Masp1	64023	-0.0749461	13.6113	-0.768792	0.452392	0.740943	-5.83801
ENSRNOG00000001828	Stk38l	691337	-0.0986923	11.8942	-1.54022	0.141609	0.430653	-5.01308
ENSRNOG00000001829	Ube2v2	287927	0.0293371	13.4016	0.693063	0.497475	0.769977	-5.89209
ENSRNOG00000001837	Sst	24797	-0.133158	12.9529	-0.876822	0.392604	0.696891	-5.75189
ENSRNOG00000001847	Ccdc91	312863	0.0147789	12.3122	0.214599	0.832591	0.936698	-6.10772
ENSRNOG00000001849	Mapk1	116590	-0.23935	14.1174	-2.89124	0.0100216	0.120131	-2.72693
ENSRNOG00000001852	Ergic2	297728	-0.0238471	10.876	-0.40604	0.689695	0.873714	-6.04817
ENSRNOG00000001860	Ccdc116	287936	-0.0338291	6.71103	-0.143413	0.887622	0.956348	-6.12055
ENSRNOG00000001861	Ydjc	287938	-0.0859415	9.77176	-0.681844	0.504371	0.773746	-5.89966
ENSRNOG00000001865	Serpind1	79224	-0.157343	5.25915	-0.577437	0.571088	0.816573	-5.96441
ENSRNOG00000001867	Snap29	116500	-0.0515022	10.5877	-0.930713	0.364817	0.674706	-5.70507
ENSRNOG00000001873	P2rx6	25041	0.299045	11.2075	0.934224	0.363054	0.673647	-5.70194
ENSRNOG00000001885	Trmt2a	287953	0.0313164	12.011	0.593167	0.56075	0.810579	-5.95531
ENSRNOG00000001889	Comt	24267	0.436569	11.6131	3.06484	0.00690993	0.103383	-2.39029
ENSRNOG00000001890	Txnrd2	50551	0.192438	10.7429	2.14595	0.0463525	0.248762	-4.08367
ENSRNOG00000001924	Tp63	246334	-0.208184	6.18048	-1.87168	0.0782697	0.322861	-4.52917
ENSRNOG00000001926	Cldn1	65129	-0.248682	9.02552	-0.593575	0.560483	0.810579	-5.95507
ENSRNOG00000001928	Il1rap	25466	-0.117927	12.1129	-0.983781	0.338791	0.652396	-5.65653
ENSRNOG00000001930	Ccdc50	288022	0.0550838	10.9386	0.963843	0.348413	0.660071	-5.67505
ENSRNOG00000001931	Fgf12	170630	0.0424537	13.8764	0.477885	0.638718	0.852101	-6.01652
ENSRNOG00000001942	Smr3b	24867	0.00998321	4.9993	0.0593696	0.953339	0.982188	-6.12914
ENSRNOG00000001943	Retnlg	288135	-0.0769527	6.97786	-0.573318	0.573812	0.818043	-5.96675
ENSRNOG00000001945	Vcsa2	289526	-0.112514	4.62852	-1.05321	0.306741	0.62158	-5.58942
ENSRNOG00000001949	Smr3a	498341	-0.135895	5.22363	-1.12312	0.276743	0.589873	-5.51783
ENSRNOG00000001950	Cabs1	64029	0.0378776	4.62197	0.469683	0.644451	0.854431	-6.02038
ENSRNOG00000001951	Csn3	29188	0.190507	4.76175	1.25482	0.226242	0.540487	-5.37238
ENSRNOG00000001953	Bace2	288227	-0.0642613	10.4314	-0.280967	0.78207	0.915105	-6.0912
ENSRNOG00000001955	Retnla	81712	0.0297795	5.11114	0.239733	0.813357	0.929349	-6.10198
ENSRNOG00000001957	Sult1e1	360268	0.0482402	6.37584	0.470062	0.644185	0.854431	-6.02021
ENSRNOG00000001959	Mx1	24575	-0.336069	7.43554	-1.38856	0.182597	0.487851	-5.21121
ENSRNOG00000001960	Sult1d1	60393	0.373687	10.735	3.7771	0.00146593	0.057808	-0.97211
ENSRNOG00000001963	Mx2	286918	0.20221	11.4471	3.07484	0.00676283	0.102649	-2.37074
ENSRNOG00000001964	Cd47	29364	-0.0765601	13.3795	-1.21951	0.239027	0.554121	-5.4127
ENSRNOG00000001967	Sult1b1	64305	0.117639	4.62727	0.83559	0.414785	0.714702	-5.78599
ENSRNOG00000001971	Bbx	303970	-0.032006	12.6829	-0.514239	0.613596	0.838417	-5.99859
ENSRNOG00000001973	Ugt2a3	63867	-0.115682	5.70935	-0.663758	0.5156	0.780483	-5.91161
ENSRNOG00000001976	Tmprss2	156435	-0.157114	5.47115	-1.03638	0.314303	0.629012	-5.60605
ENSRNOG00000001979	Rcan1	266766	-0.105293	12.5597	-1.49322	0.153404	0.448391	-5.07616
ENSRNOG00000001980	Ugt2b35	83808	0.0564053	4.9902	0.494613	0.6271	0.846608	-6.00843
ENSRNOG00000001982	Cblb	171136	-0.129006	12.0063	-1.18186	0.253261	0.56833	-5.45463
ENSRNOG00000001984	Kcne1	25471	0.0984755	5.08671	1.09861	0.287003	0.600595	-5.54338
ENSRNOG00000001986	Fam243a	498063	-0.177788	4.80836	-1.28706	0.215038	0.528501	-5.33474
ENSRNOG00000001989	Alcam	79559	-0.12352	13.6746	-2.21502	0.0404591	0.233229	-3.96601
ENSRNOG00000001990	Ugt2b17	286954	-0.00360003	5.25244	-0.028814	0.977343	0.991739	-6.1305
ENSRNOG00000001991	Atp5po	192241	0.0040074	12.8261	0.0566096	0.955505	0.982746	-6.1293
ENSRNOG00000001996	Ythdc1	170956	0.0451279	13.0704	0.962667	0.348987	0.660071	-5.67613
ENSRNOG00000002002	Tmprss11b	365265	-0.0072084	4.36317	-0.0961846	0.92448	0.970394	-6.12626
ENSRNOG00000002011	Gnrhr	81668	-0.379466	7.32148	-1.14882	0.266277	0.579487	-5.49052
ENSRNOG00000002012	Donson	288257	0.198665	10.5636	3.80235	0.00138714	0.0567757	-0.921338
ENSRNOG00000002014	Stap1	305269	-0.210349	5.2691	-1.79092	0.0908308	0.345871	-4.65302
ENSRNOG00000002026	Dnajc28	360699	-0.346146	8.95402	-1.9378	0.0691574	0.304349	-4.42518
ENSRNOG00000002028	Tmem50b	360698	0.0517214	14.1318	0.681776	0.504413	0.773746	-5.8997
ENSRNOG00000002031	Naa11	289482	0.242619	9.57072	1.10761	0.283203	0.597006	-5.53405
ENSRNOG00000002035	Paqr3	305203	-0.207831	12.8735	-3.89176	0.00114069	0.051288	-0.741502
ENSRNOG00000002042	Gfi1	24388	0.259418	7.56426	1.33163	0.200273	0.507906	-5.28143
ENSRNOG00000002044	Gtpbp8	360714	0.122422	9.98498	1.48214	0.156301	0.451984	-5.09082
ENSRNOG00000002045	Anxa3	25291	0.0245117	12.8208	0.434196	0.669517	0.864984	-6.03637
ENSRNOG00000002050	Igfbp7	289560	0.120577	13.7776	2.35208	0.0307606	0.2044	-3.72682
ENSRNOG00000002052	Ccdc80	64387	0.105171	11.1127	1.16792	0.258696	0.572796	-5.46988
ENSRNOG00000002055	Noa1	289562	0.0135329	11.1029	0.211864	0.834691	0.937827	-6.10831
ENSRNOG00000002057	Slc10a6	289459	-0.0876742	8.46566	-0.435372	0.668679	0.864984	-6.03586
ENSRNOG00000002074	Rest	83618	-0.146598	8.06493	-1.18165	0.253345	0.56833	-5.45487
ENSRNOG00000002079	Mapk10	25272	-0.19431	13.3408	-3.33975	0.00381042	0.0787967	-1.84794
ENSRNOG00000002085	Thegl	498350	0.168653	8.83217	1.03447	0.315172	0.630104	-5.60793
ENSRNOG00000002093	Tgfbr3	29610	-0.101557	9.55562	-1.01751	0.322938	0.638243	-5.62443
ENSRNOG00000002094	Atg3	171415	0.0325583	12.5427	0.708644	0.487991	0.764994	-5.8814
ENSRNOG00000002097	Rasl11b	305302	-0.22536	11.1572	-1.75422	0.0971005	0.358328	-4.70809
ENSRNOG00000002101	Paics	140946	0.128568	13.0127	1.46308	0.161389	0.45963	-5.11583
ENSRNOG00000002104	Scaf4	245924	-0.0729086	11.7922	-1.34036	0.197479	0.504889	-5.27082
ENSRNOG00000002115	Sod1	24786	0.122298	14.6397	2.15893	0.0451882	0.245665	-4.06172
ENSRNOG00000002117	Barhl2	65050	0.553433	7.23206	1.60391	0.126846	0.406009	-4.9253
ENSRNOG00000002120	Spata18	289586	0.212077	8.15588	0.618119	0.544555	0.801398	-5.9404
ENSRNOG00000002121	Lrrc8d	305131	0.00309016	12.7975	0.028033	0.977957	0.991739	-6.13052
ENSRNOG00000002122	Lrrc8c	289443	-0.0135875	10.6306	-0.151719	0.881165	0.954759	-6.11932
ENSRNOG00000002126	Ncam2	288280	0.0892403	13.277	0.994166	0.333853	0.647861	-5.64675
ENSRNOG00000002141	Cd200	24560	-0.0886145	13.3088	-0.903947	0.378447	0.68607	-5.72864
ENSRNOG00000002142	Cds1	81925	0.0329888	13.646	0.288717	0.776231	0.912897	-6.08898
ENSRNOG00000002144	Exoc1	305287	-0.141599	11.9396	-2.92502	0.00932508	0.117605	-2.66186
ENSRNOG00000002149	Nkx6-1	65193	0.30995	8.2089	3.88639	0.00115419	0.0516512	-0.752318
ENSRNOG00000002154	Mepe	79110	0.0323081	9.54324	0.355469	0.726538	0.890363	-6.06743
ENSRNOG00000002158	Ibsp	24477	-0.110352	8.10648	-0.807023	0.430617	0.72687	-5.80872
ENSRNOG00000002159	Gpat3	305166	-0.16656	9.44214	-1.61719	0.123936	0.402193	-4.90667
ENSRNOG00000002161	Tlr6	305353	-0.025187	7.90191	-0.337158	0.740056	0.897597	-6.07378
ENSRNOG00000002164	Nmu	63887	0.0288973	5.75918	0.137116	0.892523	0.958118	-6.12144
ENSRNOG00000002165	Abraxas1	289468	-0.0783087	8.06726	-0.540074	0.596035	0.829887	-5.98508
ENSRNOG00000002167	Dmp1	25312	-0.0941688	6.38551	-0.73596	0.471623	0.755031	-5.8621
ENSRNOG00000002168	Dspp	25254	0.302419	7.19143	1.58468	0.13116	0.412749	-4.95208
ENSRNOG00000002175	Clock	60447	-0.247017	11.3399	-2.7318	0.0140463	0.139131	-3.03078
ENSRNOG00000002186	Nudt9	305149	0.124678	13.0178	2.1447	0.0464664	0.248891	-4.08579
ENSRNOG00000002187	Ropn1	288053	-0.243037	4.86658	-1.51777	0.147146	0.439869	-5.0434
ENSRNOG00000002188	Hpse	64537	-0.305074	7.99838	-1.61627	0.124135	0.402193	-4.90795
ENSRNOG00000002191	LOC498368	498368	0.0744477	9.94023	1.37783	0.185831	0.492723	-5.22463
ENSRNOG00000002194	Coq2	498332	-0.824572	11.9262	-3.36482	0.0036081	0.0766161	-1.79806
ENSRNOG00000002199	Tmem165	364137	0.0483096	11.2948	0.799544	0.434824	0.729375	-5.81456
ENSRNOG00000002205	Ociad1	289590	0.000340511	14.6978	0.00559732	0.995598	0.998668	-6.13091
ENSRNOG00000002210	Hsd17b11	289456	0.163903	13.7372	2.64475	0.0168577	0.151164	-3.19409
ENSRNOG00000002212	Hsd17b13	305150	-0.163898	9.04	-0.698098	0.494399	0.768569	-5.88866
ENSRNOG00000002216	Srd5a3	305291	-0.119008	12.0668	-1.75472	0.0970124	0.358142	-4.70734
ENSRNOG00000002218	Stbd1	305234	0.224038	9.73744	2.72996	0.0141007	0.139131	-3.03425
ENSRNOG00000002225	Scarb2	117106	-0.00842516	11.3708	-0.0800765	0.937096	0.976618	-6.12769
ENSRNOG00000002227	Kit	64030	-0.397394	12.3391	-1.97452	0.0645167	0.294365	-4.36645
ENSRNOG00000002229	Adcy5	64532	-0.384872	11.0174	-3.00657	0.00783167	0.109314	-2.50388
ENSRNOG00000002240	Slc49a4	303902	0.0162707	12.8062	0.335416	0.741347	0.898037	-6.07437
ENSRNOG00000002241	Hspbap1	171460	0.06923	10.1274	0.999589	0.331295	0.644997	-5.6416
ENSRNOG00000002247	Nup54	53372	0.102063	11.4612	1.89663	0.0747128	0.316438	-4.4902
ENSRNOG00000002251	Sec31a	93646	-0.0406	13.8984	-0.702209	0.491895	0.767062	-5.88584
ENSRNOG00000002253	Wdr5b	303907	0.0613682	8.25343	0.388872	0.702118	0.878199	-6.05499
ENSRNOG00000002254	Tmem33	59303	0.0383722	12.237	0.710228	0.487034	0.764913	-5.8803
ENSRNOG00000002255	Fam162a	360721	0.104493	12.5821	2.20094	0.041602	0.236533	-3.99017
ENSRNOG00000002256	Art3	305235	0.460452	10.2168	3.52222	0.00255966	0.0693144	-1.48375
ENSRNOG00000002262	Enoph1	305177	-0.123956	11.9566	-1.9534	0.0671508	0.299328	-4.40031
ENSRNOG00000002265	Casr	24247	-0.234755	8.61299	-1.04572	0.310092	0.624184	-5.59685
ENSRNOG00000002270	Hnrnpdl	305178	0.224539	13.7399	4.15348	0.000644142	0.0393934	-0.215814
ENSRNOG00000002273	Naaa	497009	0.216549	10.7812	1.9628	0.0659669	0.297027	-4.38527
ENSRNOG00000002275	Fip1l1	289582	-0.00571628	13.2796	-0.115335	0.909509	0.964944	-6.12421
ENSRNOG00000002292	Hnrnpd	79256	0.082631	14.7514	1.89012	0.0756268	0.318126	-4.5004
ENSRNOG00000002301	Uso1	56042	-0.0705125	12.9234	-1.4596	0.162333	0.460453	-5.12038
ENSRNOG00000002302	Corin	289596	0.0644064	5.87572	0.285385	0.77874	0.914157	-6.08994
ENSRNOG00000002303	Kcnj12	117052	0.263436	10.2996	1.30318	0.209604	0.51959	-5.31563
ENSRNOG00000002305	Slc15a2	60577	0.0100752	13.4352	0.214546	0.832631	0.936698	-6.10774
ENSRNOG00000002309	Hlx	364069	0.0679095	7.74326	0.417917	0.681153	0.870219	-6.04329
ENSRNOG00000002319	Tsn	60381	0.0335186	11.8338	0.401982	0.692623	0.875171	-6.04981
ENSRNOG00000002327	Gabrb1	25450	-0.103186	13.3623	-1.72941	0.101549	0.366704	-4.74488
ENSRNOG00000002331	Aldh3a1	25375	0.232876	7.3315	1.23501	0.233347	0.547848	-5.39512
ENSRNOG00000002332	Mospd1	317312	0.0807397	11.827	0.358128	0.724583	0.88952	-6.06648
ENSRNOG00000002333	Olr982	404929	0.0793756	4.99649	0.554244	0.58651	0.825305	-5.9774
ENSRNOG00000002336	Gabra4	140675	0.0515761	13.3309	0.66457	0.515093	0.78031	-5.91108
ENSRNOG00000002338	Dgke	497978	0.0260956	12.5649	0.356958	0.725443	0.889715	-6.0669
ENSRNOG00000002339	Mark1	117016	-0.107229	12.5562	-2.02314	0.0588024	0.281802	-4.28765
ENSRNOG00000002341	Trim25	494338	0.149926	10.0836	1.09753	0.28746	0.601421	-5.54449
ENSRNOG00000002342	Aldh3a2	65183	0.0788383	12.4727	1.27283	0.219928	0.534511	-5.35145
ENSRNOG00000002343	Uchl1	29545	-0.012441	14.8455	-0.206233	0.839018	0.939337	-6.1095
ENSRNOG00000002350	Eaf2	266787	0.0161677	6.50061	0.119346	0.906377	0.963707	-6.12374
ENSRNOG00000002353	Rab3gap2	289350	-0.0495404	11.7854	-0.84272	0.410892	0.711566	-5.7802
ENSRNOG00000002358	Scpep1	114861	-0.105636	12.2808	-1.19397	0.248614	0.56303	-5.44126
ENSRNOG00000002360	Gabrg1	140674	0.220736	12.8646	3.08765	0.00657868	0.101345	-2.34567
ENSRNOG00000002361	Prkg2	25523	0.701781	10.57	2.23377	0.038983	0.229091	-3.93373
ENSRNOG00000002364	Rnf112	24916	-0.372248	12.7992	-3.25891	0.00454225	0.0828072	-2.00837
ENSRNOG00000002365	Itm2a	317218	0.100733	13.1378	1.25708	0.225442	0.539179	-5.36977
ENSRNOG00000002369	Rgs8	54297	-0.220226	11.2616	-1.87935	0.0771615	0.321427	-4.51724
ENSRNOG00000002373	Akap1	114124	-0.232352	11.5619	-3.18473	0.0053345	0.0906389	-2.15494
ENSRNOG00000002378	Bpnt1	64473	0.0402012	13.0983	0.577762	0.570874	0.816573	-5.96422
ENSRNOG00000002379	Plac1	317316	0.0961697	6.45917	0.543918	0.593444	0.828434	-5.98301
ENSRNOG00000002381	Bmp3	25667	-0.509619	9.56625	-1.60965	0.125581	0.404808	-4.91726
ENSRNOG00000002382	LOC102553715	287382	-0.132261	11.1443	-0.668618	0.512568	0.778986	-5.90842
ENSRNOG00000002387	Tceal1	302593	0.0371653	13.2368	0.851594	0.406081	0.708166	-5.77293
ENSRNOG00000002389	Morf4l2	317413	-0.0112231	13.8071	-0.278369	0.784031	0.915814	-6.09193
ENSRNOG00000002393	Eprs	289352	0.0109327	12.8197	0.17746	0.86121	0.948431	-6.11505
ENSRNOG00000002403	Fam129a	63912	-0.0535891	8.39119	-0.494359	0.627275	0.846608	-6.00855
ENSRNOG00000002408	Rbm47	305340	0.277267	9.54032	0.538148	0.597335	0.830525	-5.98611
ENSRNOG00000002413	Gpc4	317322	-0.209196	10.5884	-1.7313	0.101203	0.366099	-4.74208
ENSRNOG00000002417	Serpinb10	266775	0.167222	5.03136	1.52092	0.146359	0.438434	-5.03917
ENSRNOG00000002418	Tgfb2	81809	0.0652869	12.6559	0.409576	0.687147	0.873045	-6.04673
ENSRNOG00000002419	Plp1	24943	0.0980687	15.5423	1.74165	0.0993314	0.362547	-4.72676
ENSRNOG00000002425	Pctp	29510	0.0980608	8.6331	0.556483	0.585012	0.824118	-5.97617
ENSRNOG00000002433	G3bp2	305240	-0.1392	13.6067	-2.35191	0.0307715	0.2044	-3.72713
ENSRNOG00000002434	Tmem100	497979	-0.112333	11.6776	-1.61436	0.124552	0.402836	-4.91065
ENSRNOG00000002436	Mmd	303439	-0.0550336	13.8768	-1.09487	0.288594	0.60304	-5.54724
ENSRNOG00000002440	Ralb	116546	-0.0107013	11.9054	-0.192219	0.84981	0.943555	-6.1123
ENSRNOG00000002443	Mfap3	287299	-0.027662	11.9477	-0.368939	0.716653	0.886584	-6.06254
ENSRNOG00000002449	Maged2	113947	0.0411967	12.6847	0.589192	0.563353	0.811212	-5.95763
ENSRNOG00000002450	Rrp15	360895	0.110707	11.8509	1.61675	0.124032	0.402193	-4.90729
ENSRNOG00000002454	Rnf2	304850	-0.0464492	12.2465	-0.75474	0.460563	0.745853	-5.84844
ENSRNOG00000002460	Serpinb2	60325	-0.140559	5.10906	-1.4115	0.17584	0.478194	-5.18226
ENSRNOG00000002468	Tnr	25567	-0.143306	12.4765	-1.63761	0.119574	0.395953	-4.8778
ENSRNOG00000002470	Ifi47	246208	0.0788702	9.36558	0.455153	0.654663	0.859006	-6.02708
ENSRNOG00000002478	Insig2	288985	0.00160575	12.3975	0.0274167	0.978441	0.991875	-6.13054
ENSRNOG00000002484	Chrna9	65024	0.113001	4.76015	1.21061	0.242336	0.55581	-5.42271
ENSRNOG00000002488	Galnt10	170501	-0.332418	9.67554	-2.39224	0.0283592	0.194553	-3.6554
ENSRNOG00000002506	Cdkl2	305242	-0.109025	12.6433	-1.22187	0.238156	0.5535	-5.41004
ENSRNOG00000002511	Flt4	114110	-0.0622394	8.14561	-0.507876	0.617958	0.841002	-6.00182
ENSRNOG00000002514	Ccdc93	304743	-0.0737297	10.0148	-0.882446	0.389641	0.695019	-5.74712
ENSRNOG00000002516	Mtm1	288762	-0.0881438	12.2709	-1.97213	0.0648103	0.294365	-4.3703
ENSRNOG00000002517	Pdc	25343	0.00703026	6.52849	0.0481144	0.962177	0.986299	-6.12975
ENSRNOG00000002524	Gpr37	117549	0.0155189	14.3719	0.191912	0.850047	0.94369	-6.11236
ENSRNOG00000002525	Ptgs2	29527	-0.28812	11.9124	-1.6376	0.119576	0.395953	-4.87781
ENSRNOG00000002532	Prm1	24685	0.278097	8.06737	1.26004	0.224398	0.538107	-5.36634
ENSRNOG00000002536	C1galt1c1	302499	0.060791	10.8998	0.604361	0.553453	0.807258	-5.94869
ENSRNOG00000002538	Epb41l5	304733	-0.219672	8.04908	-1.21759	0.23974	0.554243	-5.41487
ENSRNOG00000002539	Prm2	25345	-0.135627	7.86199	-0.852598	0.405539	0.707993	-5.7721
ENSRNOG00000002540	Rhoh	305341	0.0141264	6.88384	0.082623	0.9351	0.975846	-6.12748
ENSRNOG00000002541	Pds5a	305343	-0.0227795	11.3981	-0.430765	0.671962	0.866037	-6.03785
ENSRNOG00000002542	Heatr6	497972	-0.172422	8.3792	-2.31458	0.0331737	0.213225	-3.79299
ENSRNOG00000002546	Rchy1	289508	-0.0788077	10.7037	-1.26669	0.222068	0.536378	-5.35862
ENSRNOG00000002553	Smim14	364154	-0.0375341	13.1019	-0.797735	0.435845	0.730136	-5.81596
ENSRNOG00000002555	Serpinb7	117092	-0.00206192	5.16209	-0.0187132	0.985284	0.994044	-6.13074
ENSRNOG00000002563	Mcts1	302500	-0.0969435	11.5559	-1.25423	0.226453	0.540501	-5.37307
ENSRNOG00000002564	Prm3	442921	0.0805211	4.70599	0.409217	0.687405	0.873045	-6.04688
ENSRNOG00000002566	Tnp2	24840	-0.139852	8.71214	-0.929298	0.365529	0.675358	-5.70634
ENSRNOG00000002568	Socs1	252971	-0.079619	6.07693	-0.616705	0.545466	0.801739	-5.94126
ENSRNOG00000002571	Tekt5	363538	-0.177231	8.34788	-0.64906	0.524829	0.786707	-5.92109
ENSRNOG00000002572	Cacybp	289144	0.0861365	13.2278	1.23556	0.233148	0.547651	-5.39449
ENSRNOG00000002574	Nubp1	287042	-0.0423346	10.5176	-0.697031	0.49505	0.768913	-5.88939
ENSRNOG00000002579	Parm1	286894	-0.330478	11.5469	-1.8319	0.0842516	0.335038	-4.59063
ENSRNOG00000002580	Trmt1l	304851	-0.086526	11.0537	-1.3646	0.189878	0.49562	-5.24105
ENSRNOG00000002582	Hand1	59112	0.0190415	5.10822	0.130603	0.897597	0.959934	-6.12232
ENSRNOG00000002593	Esrrg	360896	-0.119009	10.9579	-0.963558	0.348553	0.660071	-5.67531
ENSRNOG00000002595	Dpp10	363972	0.125454	10.2991	0.40535	0.690192	0.873835	-6.04845
ENSRNOG00000002597	Hsd17b6	286964	0.0551864	5.06216	0.420087	0.679596	0.869752	-6.04238
ENSRNOG00000002598	Hnf1b	25640	-0.0398537	7.08854	-0.394966	0.697699	0.876694	-6.0526
ENSRNOG00000002599	Grap	363616	-0.213919	6.95373	-1.06684	0.300716	0.617099	-5.57578
ENSRNOG00000002610	Carhsp1	260416	0.13886	10.8135	1.12605	0.275533	0.589033	-5.51474
ENSRNOG00000002612	Ddx52	85432	0.0892031	10.9671	1.28971	0.214136	0.527292	-5.33161
ENSRNOG00000002618	Ivns1abp	289089	0.0798472	14.2954	1.62543	0.12216	0.400179	-4.89505
ENSRNOG00000002628	LOC108348133	286981	0.06825	5.50464	0.687517	0.500877	0.771819	-5.89585
ENSRNOG00000002630	Cnot8	363603	0.103041	13.0438	2.13969	0.0469239	0.24918	-4.09424
ENSRNOG00000002636	Abat	81632	-0.074034	13.4252	-0.76508	0.454542	0.742408	-5.84078
ENSRNOG00000002640	Serpinb5	116589	-0.145685	5.18813	-0.53831	0.597226	0.830525	-5.98602
ENSRNOG00000002643	Ugdh	83472	0.106116	11.7804	2.34252	0.0313596	0.206323	-3.74373
ENSRNOG00000002653	Kcnk2	170899	-0.0426143	11.9992	-0.58277	0.567572	0.814161	-5.96135
ENSRNOG00000002657	Pla2g4a	24653	0.207926	10.8336	1.97715	0.0641951	0.293904	-4.36222
ENSRNOG00000002659	Ciita	85483	0.31926	6.51541	3.72012	0.00166057	0.0595059	-1.08666
ENSRNOG00000002660	Magee1	317232	-0.081645	13.9781	-0.619555	0.54363	0.800909	-5.93952
ENSRNOG00000002664	Emp2	360468	-0.0968261	8.55674	-0.826312	0.419885	0.717107	-5.79345
ENSRNOG00000002671	Nme2	83782	-0.0367747	14.7726	-0.542445	0.594436	0.828871	-5.98381
ENSRNOG00000002693	Nme1	191575	0.170204	14.2557	4.30148	0.000466829	0.0361773	0.0803498
ENSRNOG00000002695	Tfb2m	289307	0.0588428	11.992	1.27622	0.218757	0.533161	-5.34749
ENSRNOG00000002701	Hgd	360719	-0.00420801	4.90638	-0.0311696	0.975491	0.991739	-6.13043
ENSRNOG00000002705	Vps4b	360834	0.00890835	12.6476	0.152489	0.880567	0.954759	-6.1192
ENSRNOG00000002711	Nuf2	304951	0.103922	7.51906	0.751606	0.462398	0.746794	-5.85074
ENSRNOG00000002713	Zfp672	303165	-0.0465998	10.1574	-0.546182	0.59192	0.828271	-5.98179
ENSRNOG00000002718	Scgb3a1	338418	0.0996499	6.8177	1.00625	0.328174	0.642892	-5.63526
ENSRNOG00000002721	Ndufb4	288088	0.128709	13.7265	2.29016	0.0348386	0.217798	-3.83579
ENSRNOG00000002723	Sele	25544	-0.0190182	6.46715	-0.148399	0.883745	0.955134	-6.11982
ENSRNOG00000002724	Prpsap2	117272	0.00873655	12.6813	0.161422	0.873633	0.951888	-6.11779
ENSRNOG00000002728	Btc	64022	-0.120275	7.09558	-0.779558	0.446192	0.737233	-5.8299
ENSRNOG00000002730	Rgs5	54294	0.0838497	13.5878	1.10472	0.28442	0.597842	-5.53706
ENSRNOG00000002746	Fstl1	79210	-0.0516882	12.6588	-0.35362	0.727899	0.891358	-6.06808
ENSRNOG00000002751	Zdhhc15	317235	-0.177535	9.57612	-1.68666	0.109628	0.380057	-4.8074
ENSRNOG00000002754	Areg	29183	-0.146756	4.62798	-1.61629	0.124131	0.402193	-4.90793
ENSRNOG00000002755	Pafah1b1	83572	0.0460428	13.8854	0.853513	0.405046	0.707772	-5.77135
ENSRNOG00000002757	Tada2a	360581	0.105204	11.2034	1.3019	0.210029	0.519928	-5.31715
ENSRNOG00000002759	Lias	305348	0.116556	11.7292	1.87821	0.0773251	0.321721	-4.51901
ENSRNOG00000002767	Dlg3	58948	-0.0806261	13.6345	-1.40165	0.178717	0.482588	-5.19474
ENSRNOG00000002771	Ereg	59325	0.0723602	4.9731	0.692621	0.497746	0.769977	-5.89239
ENSRNOG00000002773	Rgs4	29480	-0.154945	12.2948	-0.427129	0.674557	0.86725	-6.0394
ENSRNOG00000002775	Npl	304860	-0.258153	9.41268	-2.72198	0.0143396	0.140334	-3.04931
ENSRNOG00000002776	Sell	29259	0.163213	5.51674	1.21927	0.239116	0.554121	-5.41297
ENSRNOG00000002778	Aatf	114512	0.0174676	11.1362	0.327248	0.747409	0.901051	-6.07708
ENSRNOG00000002783	Serpinc1	304917	0.03343	5.60207	0.28739	0.77723	0.913171	-6.08936
ENSRNOG00000002784	Pou3f4	29589	0.441719	9.92622	3.35911	0.00365325	0.0767342	-1.80944
ENSRNOG00000002790	Abcb7	302395	0.0525445	11.6917	0.564663	0.579556	0.820384	-5.97163
ENSRNOG00000002791	Bcl2	24224	-0.0315506	10.4798	-0.321149	0.751947	0.903152	-6.07906
ENSRNOG00000002792	Cxcl2	114105	0.201066	6.03066	1.2487	0.228419	0.542451	-5.37944
ENSRNOG00000002793	Sstr2	54305	-0.0258848	11.3073	-0.265182	0.794005	0.919506	-6.09553
ENSRNOG00000002794	Selp	25651	-0.0661993	5.53739	-0.620644	0.54293	0.800248	-5.93886
ENSRNOG00000002797	Gpr156	260430	0.146018	6.65891	1.43773	0.168366	0.468097	-5.14872
ENSRNOG00000002802	Cxcl1	81503	0.177541	8.12412	1.68751	0.109463	0.380057	-4.80618
ENSRNOG00000002810	Gfpt2	360518	-0.0862761	8.91722	-0.925479	0.367456	0.676685	-5.70973
ENSRNOG00000002811	Brinp3	286901	0.0272797	11.4266	0.202331	0.84202	0.940378	-6.1103
ENSRNOG00000002812	Lhx1	257634	0.32068	5.81101	1.52286	0.145876	0.437793	-5.03656
ENSRNOG00000002813	Dars2	304919	0.0889873	11.2818	1.62143	0.123019	0.40117	-4.90069
ENSRNOG00000002820	LOC24906	24906	0.0387025	5.48227	0.38683	0.703602	0.879572	-6.05578
ENSRNOG00000002821	Phlpp1	59265	-0.0511308	13.4818	-0.651902	0.523037	0.785133	-5.91927
ENSRNOG00000002823	Mapk9	50658	0.0641118	13.9998	1.2938	0.212752	0.525239	-5.32677
ENSRNOG00000002826	Hsd17b7	29540	-0.115415	11.624	-1.06447	0.301756	0.618168	-5.57816
ENSRNOG00000002828	Tob1	170842	0.0778735	13.6159	0.934794	0.362768	0.673269	-5.70143
ENSRNOG00000002829	Ppbp	246358	-0.00390564	6.03393	-0.025535	0.979921	0.992309	-6.13059
ENSRNOG00000002832	Slc16a2	259248	-0.547062	11.9703	-2.4311	0.0262034	0.186931	-3.58574
ENSRNOG00000002833	Gsk3b	84027	-0.181799	13.043	-2.31566	0.0331017	0.213193	-3.79109
ENSRNOG00000002839	Slc19a2	289175	-0.0731552	11.2774	-0.671238	0.510938	0.777514	-5.9067
ENSRNOG00000002840	Atp5f1b	171374	-0.0315471	14.8211	-0.558153	0.583896	0.823473	-5.97524
ENSRNOG00000002841	Cdc42bpa	114116	-0.0453654	12.3796	-0.599785	0.556429	0.808889	-5.95141
ENSRNOG00000002843	Cxcl6	60665	-0.108408	5.25796	-0.708677	0.487972	0.764994	-5.88137
ENSRNOG00000002851	Fam104a	619573	-0.107878	13.148	-1.68128	0.110683	0.381565	-4.81519
ENSRNOG00000002858	Olr1432	287321	0.253553	5.32584	1.98235	0.0635636	0.292301	-4.35383
ENSRNOG00000002860	Ccdc181	360867	0.20471	13.4599	3.77968	0.00145767	0.057808	-0.966917
ENSRNOG00000002862	Clcn5	25749	-0.119048	5.89049	-0.960743	0.349927	0.66115	-5.6779
ENSRNOG00000002863	Cacna1e	54234	-0.379294	11.0001	-2.95669	0.00871499	0.114098	-2.60067
ENSRNOG00000002864	Nacc1	171454	-0.490322	13.0886	-3.60623	0.00213031	0.0630625	-1.31536
ENSRNOG00000002866	Rassf6	305251	-0.0859246	5.63707	-0.306353	0.762995	0.907067	-6.08372
ENSRNOG00000002878	Afm	282708	0.196089	5.07192	1.53567	0.142718	0.432692	-5.01926
ENSRNOG00000002879	Psen2	81751	0.0240017	11.0055	0.360519	0.722826	0.888586	-6.06562
ENSRNOG00000002884	Blzf1	498266	-0.0636514	12.1731	-1.59483	0.128868	0.408829	-4.93798
ENSRNOG00000002886	Myh10	79433	0.0339408	12.3987	0.497822	0.624882	0.845902	-6.00684
ENSRNOG00000002889	Afp	24177	-0.177745	6.97372	-1.40166	0.178714	0.482588	-5.19473
ENSRNOG00000002896	Prdx6	94167	0.0628862	14.6263	1.23935	0.231778	0.546197	-5.39017
ENSRNOG00000002898	Nme7	171566	0.128239	12.7217	2.18791	0.0426847	0.239477	-4.01243
ENSRNOG00000002903	Specc1	303208	-0.159609	12.1181	-1.60888	0.125749	0.404808	-4.91833
ENSRNOG00000002906	Nr1i2	84385	-0.0334991	5.45504	-0.234792	0.817129	0.931356	-6.10316
ENSRNOG00000002908	Slc35a4	257647	-0.0747689	12.2624	-1.24283	0.230523	0.545111	-5.38618
ENSRNOG00000002911	Alb	24186	0.439249	6.6581	3.63343	0.00200733	0.0628807	-1.26079
ENSRNOG00000002914	Trmt1	288914	-0.0430345	11.2137	-1.0024	0.329976	0.644672	-5.63893
ENSRNOG00000002916	Car4	29242	0.0931268	12.2789	1.13165	0.273235	0.586725	-5.50882
ENSRNOG00000002918	FAM187A	287741	-0.5745	5.98515	-3.17768	0.00541653	0.0913037	-2.16884
ENSRNOG00000002919	Gfap	24387	-0.0311071	14.4891	-0.403842	0.69128	0.874374	-6.04906
ENSRNOG00000002921	Akap4	79254	-0.256892	5.08218	-2.2893	0.0348985	0.217847	-3.83729
ENSRNOG00000002922	Adora2b	29316	0.0652929	10.6757	0.904089	0.378374	0.686069	-5.72852
ENSRNOG00000002925	Tsx	29391	-0.0739696	6.12544	-0.491219	0.629449	0.847245	-6.01009
ENSRNOG00000002928	Guk1	303179	0.0357098	14.0022	0.484899	0.633835	0.849271	-6.01316
ENSRNOG00000002934	Atp1b1	25650	-0.0362043	15.1844	-0.855685	0.403875	0.707404	-5.76955
ENSRNOG00000002937	Ren	24715	-0.259179	6.96116	-1.65101	0.116783	0.391825	-4.85871
ENSRNOG00000002941	Uhmk1	246332	-0.190658	12.6836	-3.2464	0.00466718	0.084004	-2.03313
ENSRNOG00000002946	Socs3	89829	-0.147901	7.27341	-1.14424	0.268121	0.581111	-5.49542
ENSRNOG00000002948	Abcc3	140668	-0.396951	6.33101	-1.51379	0.148147	0.441703	-5.04874
ENSRNOG00000002950	Lyl1	304663	0.0543398	6.27073	0.455266	0.654584	0.859006	-6.02702
ENSRNOG00000002953	P2ry4	63843	0.0359277	8.04373	0.388663	0.70227	0.878253	-6.05507
ENSRNOG00000002964	Xcl1	171371	0.196807	7.70675	0.593683	0.560412	0.810579	-5.95501
ENSRNOG00000002968	Tnfsf4	89814	0.147409	6.0129	0.839823	0.412471	0.712943	-5.78255
ENSRNOG00000002969	Itpkb	54260	-0.350932	9.60288	-2.82417	0.0115569	0.127636	-2.85546
ENSRNOG00000002978	Faslg	25385	0.158562	7.33803	1.48896	0.154514	0.449581	-5.08181
ENSRNOG00000002983	Nf1x	81524	-0.064251	14.3346	-1.19798	0.247091	0.561169	-5.43682
ENSRNOG00000002984	Bmp15	59302	-0.122496	8.60341	-0.484648	0.634009	0.84932	-6.01328
ENSRNOG00000002989	Nmt1	259274	-0.0807535	12.1974	-1.36846	0.18869	0.495343	-5.23627
ENSRNOG00000002991	Srr	303306	-0.129848	12.7377	-2.95494	0.00874751	0.114098	-2.60404
ENSRNOG00000002997	Slc9a3r2	116501	-0.116798	12.2597	-1.54204	0.141168	0.430187	-5.01061
ENSRNOG00000002999	Timmdc1	303922	0.0815664	12.6283	1.72418	0.102508	0.367777	-4.75258
ENSRNOG00000003020	Slc25a47	299316	-0.0551835	5.84855	-0.401009	0.693326	0.875171	-6.0502
ENSRNOG00000003026	Rad23a	361381	-0.123892	12.1333	-1.48551	0.155415	0.450551	-5.08637
ENSRNOG00000003029	Calr	64202	-0.00995554	14.8332	-0.292045	0.773728	0.911667	-6.08801
ENSRNOG00000003031	Atp2b4	29600	-0.605521	11.5252	-1.30716	0.208279	0.517953	-5.31089
ENSRNOG00000003038	Sft2d2	360868	-0.141484	8.85854	-0.712166	0.485862	0.763853	-5.87895
ENSRNOG00000003049	Hsd17b10	63864	-0.0568511	12.8339	-0.708659	0.487983	0.764994	-5.88139
ENSRNOG00000003063	Phka1	64561	0.0514898	11.7432	0.566442	0.578373	0.819502	-5.97063
ENSRNOG00000003064	Bst1	81506	-0.175784	6.04052	-0.986501	0.337493	0.651211	-5.65397
ENSRNOG00000003065	Glyr1	360477	-0.199512	13.0879	-4.64646	0.000221602	0.0311817	0.765029
ENSRNOG00000003067	Npffr2	78964	-0.00343905	5.31001	-0.0187533	0.985253	0.994044	-6.13074
ENSRNOG00000003069	Cd38	25668	0.354954	11.2833	4.35093	0.000419332	0.0355169	0.179028
ENSRNOG00000003070	Pigl	192263	-0.168948	10.1118	-1.7368	0.100205	0.364563	-4.73395
ENSRNOG00000003075	Tmem39a	288092	0.0636361	11.3601	0.585054	0.56607	0.813229	-5.96003
ENSRNOG00000003076	Rbms2	288771	-0.0370499	13.1946	-0.433816	0.669787	0.865017	-6.03653
ENSRNOG00000003081	Ribc1	317431	0.198303	10.9256	1.64009	0.119054	0.395132	-4.87428
ENSRNOG00000003084	Parp1	25591	-0.0160127	12.5844	-0.346049	0.733481	0.894517	-6.07074
ENSRNOG00000003085	Mycs	24581	-0.0822538	5.23174	-0.551716	0.588204	0.826102	-5.97878
ENSRNOG00000003094	Cmahp	361245	0.0599527	5.18773	0.607865	0.551179	0.805927	-5.9466
ENSRNOG00000003095	Fgfbp1	64535	0.282304	7.37864	1.88026	0.0770302	0.321427	-4.51581
ENSRNOG00000003098	Prom1	60357	0.221416	11.5653	2.97315	0.00841327	0.112161	-2.56877
ENSRNOG00000003100	Dusp12	64014	-0.0974401	8.87008	-0.977989	0.341567	0.654699	-5.66194
ENSRNOG00000003104	Trpv2	29465	0.0298581	10.6034	0.179239	0.859834	0.947726	-6.11473
ENSRNOG00000003108	Acbd4	303577	-0.0605737	12.1968	-0.765843	0.4541	0.742067	-5.84021
ENSRNOG00000003114	B4galt4	303923	-0.176422	10.7814	-2.01493	0.059734	0.28455	-4.30104
ENSRNOG00000003117	Psmd12	287772	0.0412754	12.8662	0.854723	0.404394	0.707404	-5.77035
ENSRNOG00000003119	Gc	24384	0.0547714	6.02452	0.709015	0.487767	0.764994	-5.88114
ENSRNOG00000003120	Prelp	84400	-0.10715	13.2838	-0.609456	0.550148	0.805161	-5.94564
ENSRNOG00000003121	Rtn4rl1	303311	-0.360188	12.9324	-4.01429	0.000872695	0.0448606	-0.495185
ENSRNOG00000003123	Rpa1	287524	0.0595127	7.83701	0.622827	0.541527	0.799294	-5.93752
ENSRNOG00000003125	Rogdi	287061	0.0119989	13.8408	0.218343	0.829719	0.93563	-6.10691
ENSRNOG00000003127	Spryd4	288772	0.0924467	11.0623	1.05956	0.303924	0.620038	-5.58308
ENSRNOG00000003134	Slc4a4	84484	0.227692	12.8702	3.74206	0.00158271	0.0582488	-1.04255
ENSRNOG00000003139	Smc1a	63996	-0.00499203	13.1966	-0.111438	0.912552	0.965212	-6.12466
ENSRNOG00000003147	Sqstm1	113894	-0.184963	14.4308	-4.10947	0.000708998	0.0408051	-0.304074
ENSRNOG00000003148	Timp2	29543	-0.0233432	13.6812	-0.187483	0.853464	0.94501	-6.11321
ENSRNOG00000003149	Farsa	288917	-0.00593132	13.0859	-0.124948	0.902006	0.961694	-6.12305
ENSRNOG00000003150	Mpc2	100359982	0.0929995	12.9517	1.7957	0.0900413	0.345335	-4.64579
ENSRNOG00000003151	Bfar	304709	-0.0273979	12.3967	-0.521606	0.608563	0.835253	-5.9948
ENSRNOG00000003163	Sdhc	289217	-0.0331496	13.8706	-0.616997	0.545277	0.801725	-5.94108
ENSRNOG00000003164	Pla2g10	29359	0.0406228	6.06097	0.31014	0.760162	0.905841	-6.08254
ENSRNOG00000003171	Mpz	24564	0.0643777	4.87137	0.705326	0.490002	0.766442	-5.88369
ENSRNOG00000003172	Serpinf1	287526	-0.00096031	11.2547	-0.00717772	0.994355	0.998426	-6.1309
ENSRNOG00000003177	Mat2b	683630	-0.194397	12.3974	-2.23514	0.0388777	0.228766	-3.93138
ENSRNOG00000003178	Mageh1	367767	0.0114269	12.7795	0.138084	0.89177	0.957948	-6.12131
ENSRNOG00000003183	Fmod	64507	-0.0525935	11.0413	-0.104066	0.918315	0.968138	-6.12546
ENSRNOG00000003185	Acbd3	289312	0.0482283	12.2176	0.96541	0.347651	0.659595	-5.67361
ENSRNOG00000003186	Anks3	302937	-0.00909802	11.6095	-0.170139	0.866876	0.949776	-6.11633
ENSRNOG00000003189	Cited1	64466	0.375105	9.86052	2.06684	0.0540614	0.27012	-4.21587
ENSRNOG00000003191	Bhlhb9	317407	0.0428497	11.6803	0.629569	0.537208	0.796372	-5.93336
ENSRNOG00000003195	Caskin1	140722	-0.419634	11.1414	-2.48012	0.0237034	0.179603	-3.49714
ENSRNOG00000003198	RGD1305733	360459	-0.0722539	12.6172	-0.851237	0.406274	0.708166	-5.77322
ENSRNOG00000003203	Hexim1	498008	0.0684034	13.4035	1.22214	0.238057	0.5535	-5.40973
ENSRNOG00000003206	Actr3	81732	-0.0254268	14.6138	-0.436695	0.667737	0.864984	-6.03528
ENSRNOG00000003210	Olr1463	287363	0.0222389	5.7833	0.184035	0.856127	0.945828	-6.11385
ENSRNOG00000003217	Lgals3bp	245955	-0.0156333	13.7377	-0.0535562	0.957903	0.983965	-6.12947
ENSRNOG00000003221	Myoc	81523	0.359137	6.38272	1.41277	0.175473	0.477683	-5.18066
ENSRNOG00000003223	Degs1	58970	-0.0557733	13.6577	-0.62811	0.538141	0.796887	-5.93426
ENSRNOG00000003226	Mprip	116504	0.0509889	13.9672	1.04584	0.310039	0.624184	-5.59674
ENSRNOG00000003228	Mid1ip1	404280	-0.130591	13.0316	-1.71459	0.10429	0.371857	-4.76668
ENSRNOG00000003232	Slc9a3r1	59114	0.110985	14.1874	2.19863	0.0417918	0.237119	-3.99412
ENSRNOG00000003233	Serpinf2	287527	0.383588	5.79462	3.58691	0.00222227	0.0636115	-1.35413
ENSRNOG00000003234	Mgrn1	302938	-0.0534443	14.1411	-1.35387	0.193212	0.500714	-5.25428
ENSRNOG00000003239	Cant1	246272	-0.207456	10.7916	-3.14404	0.00582504	0.0946743	-2.23504
ENSRNOG00000003241	Gabrg2	29709	-0.131626	13.3449	-2.63846	0.0170805	0.151735	-3.20582
ENSRNOG00000003242	Gulp1	314543	-0.0449018	9.10127	-0.178485	0.860417	0.94804	-6.11487
ENSRNOG00000003244	Ltc4s	114097	-0.0545933	5.98337	-0.362821	0.721136	0.888282	-6.06478
ENSRNOG00000003245	Cacng1	29658	0.01672	6.21997	0.168829	0.86789	0.94987	-6.11656
ENSRNOG00000003247	Sde2	289315	-0.149302	11.5002	-2.33931	0.0315633	0.20692	-3.74941
ENSRNOG00000003248	Mpzl1	360871	-0.0541665	13.6839	-0.723101	0.479287	0.759781	-5.87127
ENSRNOG00000003253	Qdpr	64192	-0.0489742	14.2964	-0.460292	0.651043	0.857384	-6.02473
ENSRNOG00000003254	Il23a	155140	0.0426634	8.72862	0.392483	0.699498	0.877017	-6.05358
ENSRNOG00000003256	Ccng1	25405	-0.0291627	13.0801	-0.427001	0.674649	0.86725	-6.03946
ENSRNOG00000003258	Cdc73	304832	0.0399014	13.2317	0.764753	0.454731	0.742517	-5.84103
ENSRNOG00000003259	C1qtnf1	303701	-0.230969	9.03767	-1.59298	0.129283	0.409275	-4.94055
ENSRNOG00000003260	Nr1i3	65035	0.139899	13.0977	2.19959	0.0417127	0.236811	-3.99248
ENSRNOG00000003262	Cacng4	140725	-0.0452878	12.9046	-0.675979	0.507996	0.776362	-5.90357
ENSRNOG00000003267	Pycr2	364064	0.0154918	10.5031	0.176958	0.861598	0.948611	-6.11514
ENSRNOG00000003269	Atp6v0e1	94170	0.189415	13.2423	1.49743	0.152316	0.447281	-5.07057
ENSRNOG00000003273	Spata20	360604	-0.0559735	8.26456	-0.40511	0.690365	0.873913	-6.04855
ENSRNOG00000003275	Spata32	287747	-0.1057	7.24672	-0.680968	0.504911	0.774262	-5.90024
ENSRNOG00000003276	Myo1d	25485	-0.110489	11.8326	-0.715028	0.484136	0.762688	-5.87695
ENSRNOG00000003280	Grin2c	24411	-0.0646417	10.8947	-1.17978	0.254066	0.568889	-5.45691
ENSRNOG00000003284	Epn3	360605	-0.0133769	9.06768	-0.0507126	0.960136	0.985519	-6.12962
ENSRNOG00000003288	Cacng5	140726	0.527746	10.6468	3.16225	0.00560032	0.0928386	-2.19923
ENSRNOG00000003289	Lap3	289668	0.0266669	13.3188	0.314338	0.757026	0.904556	-6.08123
ENSRNOG00000003296	Dck	79127	0.0609224	10.8259	0.530162	0.602743	0.83216	-5.99034
ENSRNOG00000003298	Cd247	25300	-0.0933553	6.12794	-0.550352	0.589119	0.826216	-5.97953
ENSRNOG00000003300	Btg2	29619	0.110292	10.9337	0.599328	0.556727	0.808952	-5.95168
ENSRNOG00000003302	Flcn	303185	-0.18655	12.1013	-3.02934	0.00745799	0.107163	-2.45955
ENSRNOG00000003304	Chad	29195	0.110722	7.37927	0.560265	0.582486	0.822683	-5.97408
ENSRNOG00000003305	Cxcr3	84475	0.0117925	6.79549	0.0799798	0.937172	0.976618	-6.1277
ENSRNOG00000003313	Glra2	24397	-0.317919	9.95048	-2.33434	0.0318812	0.208264	-3.75819
ENSRNOG00000003328	Cdip1	360480	-0.138461	14.0268	-2.21343	0.0405869	0.23362	-3.96875
ENSRNOG00000003330	Acsf2	619561	0.0952392	11.8171	1.68881	0.109208	0.37964	-4.80428
ENSRNOG00000003336	Mybph	83708	-0.00598858	12.436	-0.0881226	0.930792	0.974134	-6.127
ENSRNOG00000003338	Pmp22	24660	-0.00792905	12.7449	-0.0565807	0.955528	0.982746	-6.12931
ENSRNOG00000003343	Canx	29144	-0.038707	14.6793	-0.884236	0.3887	0.694379	-5.7456
ENSRNOG00000003347	Olr1016	288858	-0.0114019	5.87179	-0.0850102	0.93323	0.975419	-6.12728
ENSRNOG00000003357	Col3a1	84032	0.0840883	10.5049	0.19298	0.849223	0.943358	-6.11216
ENSRNOG00000003359	Ogt	26295	-0.226797	12.9633	-2.53295	0.0212616	0.171026	-3.40078
ENSRNOG00000003365	Cadm3	360882	-0.333882	13.3206	-3.71829	0.00166721	0.0595202	-1.09033
ENSRNOG00000003370	Otc	25611	0.0174574	7.62206	0.049522	0.961071	0.985622	-6.12968
ENSRNOG00000003385	Glrx2	114022	0.139312	13.0952	2.39354	0.0282841	0.194379	-3.65307
ENSRNOG00000003397	Adprm	287406	0.0771954	11.6698	1.41673	0.174328	0.477088	-5.17561
ENSRNOG00000003398	Tomm40l	304971	-0.35945	11.6387	-2.14465	0.0464705	0.248891	-4.08587
ENSRNOG00000003399	Hnrnph1	140931	0.0870551	14.0735	1.73545	0.100449	0.365173	-4.73595
ENSRNOG00000003400	Fmo4	246247	0.226901	8.78622	2.86103	0.0106869	0.124038	-2.78494
ENSRNOG00000003402	Stx6	60562	0.00878741	13.1398	0.110249	0.913481	0.965212	-6.12479
ENSRNOG00000003424	Elac2	282826	-0.0236014	12.1506	-0.465915	0.647093	0.855016	-6.02214
ENSRNOG00000003428	Rufy3	360921	-0.134765	13.4594	-3.20657	0.00508806	0.0883413	-2.11185
ENSRNOG00000003439	Il15	25670	0.136544	7.40712	0.805272	0.431599	0.727627	-5.81009
ENSRNOG00000003442	Adora1	29290	-0.646949	12.402	-3.84865	0.00125351	0.0536805	-0.828219
ENSRNOG00000003453	Lypd1	360838	-0.181453	12.7822	-0.910967	0.37484	0.68343	-5.72252
ENSRNOG00000003456	Actrt1	302796	0.00880309	5.30374	0.0702137	0.944829	0.97948	-6.12843
ENSRNOG00000003468	Capn8	170808	0.0388859	5.18786	0.372629	0.713953	0.885078	-6.06118
ENSRNOG00000003469	MAST1	353118	-0.193961	12.0311	-2.07987	0.0527168	0.266435	-4.1943
ENSRNOG00000003470	Fundc1	363442	-0.0300568	10.7998	-0.491475	0.629272	0.847245	-6.00997
ENSRNOG00000003476	Slc6a4	25553	-0.15439	5.37322	-1.20758	0.243468	0.556933	-5.4261
ENSRNOG00000003486	Mnda	304988	-0.000981022	4.61609	-0.00725832	0.994292	0.998426	-6.13089
ENSRNOG00000003497	Thoc6	79227	-0.157391	10.2062	-1.61857	0.123637	0.402042	-4.90472
ENSRNOG00000003498	Olr1585	406005	0.0531882	4.23714	0.587245	0.56463	0.812263	-5.95876
ENSRNOG00000003500	Apoa2	25649	0.162959	5.72776	1.52102	0.146332	0.438434	-5.03902
ENSRNOG00000003504	Rnaseh2a	364974	0.0895073	12.0982	1.32555	0.20224	0.510109	-5.28879
ENSRNOG00000003506	Gosr2	64154	0.170633	12.386	2.21649	0.0403421	0.233104	-3.9635
ENSRNOG00000003509	Olr1588	289250	-0.281181	5.69083	-2.06815	0.0539252	0.270029	-4.21371
ENSRNOG00000003510	Fmo2	246245	-0.404371	7.94298	-1.113	0.280945	0.594722	-5.52844
ENSRNOG00000003512	Gabra1	29705	-0.242925	13.7056	-2.7908	0.0124028	0.132242	-2.91903
ENSRNOG00000003515	Ephx1	25315	0.0276132	12.8796	0.167804	0.868685	0.950339	-6.11673
ENSRNOG00000003518	Olr1592	289254	0.0752577	5.82367	0.571061	0.575307	0.81864	-5.96803
ENSRNOG00000003520	Prdx2	29338	-0.0290315	14.8886	-0.61427	0.547036	0.802884	-5.94274
ENSRNOG00000003521	Olr1593	289255	0.0729125	4.90294	0.674266	0.509058	0.776499	-5.9047
ENSRNOG00000003524	Lrrc59	287633	-0.0486591	13.2312	-0.883506	0.389084	0.694379	-5.74622
ENSRNOG00000003526	Sytl4	140594	0.176367	7.5398	1.12517	0.275896	0.589238	-5.51567
ENSRNOG00000003532	Magea11	302845	0.0495972	5.21456	0.349939	0.730611	0.892844	-6.06938
ENSRNOG00000003533	Clcn4	60586	-0.273921	13.1641	-3.94329	0.00101916	0.0483314	-0.637895
ENSRNOG00000003537	Spta1	289257	0.363019	7.64256	1.57229	0.134005	0.41721	-4.96921
ENSRNOG00000003541	Pggt1b	81746	0.12716	11.6692	2.56972	0.0197048	0.164327	-3.3332
ENSRNOG00000003545	Uchl5	360853	0.0794044	12.1789	1.20593	0.244089	0.557407	-5.42795
ENSRNOG00000003546	Tnfrsf12a	302965	0.284016	9.24019	1.41674	0.174326	0.477088	-5.1756
ENSRNOG00000003549	Cnpy2	685814	-0.0833011	13.6982	-1.52975	0.14417	0.434895	-5.02727
ENSRNOG00000003550	Acbd6	289125	0.0625438	13.1158	1.11967	0.278167	0.592007	-5.52145
ENSRNOG00000003551	B4galt3	494342	-0.118366	12.7081	-2.15711	0.0453501	0.245752	-4.06481
ENSRNOG00000003553	Efemp1	305604	0.120184	11.0724	0.83099	0.417308	0.715686	-5.7897
ENSRNOG00000003555	Olr1597	405222	-0.23039	5.09098	-1.1215	0.27741	0.59103	-5.51953
ENSRNOG00000003560	LOC103693685	289261	0.0494562	5.61844	0.360915	0.722535	0.888586	-6.06547
ENSRNOG00000003563	Blmh	287552	0.0764173	12.2591	1.23648	0.232815	0.547013	-5.39344
ENSRNOG00000003566	Apoh	287774	-0.0522886	6.15272	-0.351379	0.72955	0.892281	-6.06888
ENSRNOG00000003569	Gabra6	29708	-0.150716	5.54744	-0.723729	0.478911	0.759691	-5.87083
ENSRNOG00000003580	Ucp1	24860	-0.219574	4.91754	-2.99236	0.0080741	0.109798	-2.53151
ENSRNOG00000003585	Sytl5	302538	-0.888953	10.261	-3.4993	0.00269104	0.0700846	-1.52962
ENSRNOG00000003587	Vegfd	360457	0.38577	5.36469	1.11611	0.279649	0.593359	-5.52519
ENSRNOG00000003594	Tmem183a	289034	0.0993842	13.4164	2.41585	0.0270302	0.189938	-3.61314
ENSRNOG00000003597	Tuba4a	316531	-0.066515	14.5372	-1.42164	0.172919	0.475277	-5.16935
ENSRNOG00000003599	Utp3	305258	0.109373	12.4233	2.44562	0.0254378	0.184375	-3.55957
ENSRNOG00000003611	Dynlt3	363448	-0.0103305	13.5448	-0.180519	0.858845	0.947293	-6.1145
ENSRNOG00000003613	Mid1	54252	-0.281279	11.1099	-2.21229	0.0406783	0.234004	-3.9707
ENSRNOG00000003614	Mgat5	65271	-0.532262	10.2289	-3.42561	0.00316049	0.0741683	-1.67689
ENSRNOG00000003620	Fmo3	84493	-0.0256787	7.21894	-0.11981	0.906015	0.963532	-6.12368
ENSRNOG00000003622	Cybb	66021	0.14065	8.48475	0.553343	0.587114	0.825667	-5.97789
ENSRNOG00000003625	Ubxn4	304766	0.00295605	13.3492	0.0554636	0.956405	0.98333	-6.12937
ENSRNOG00000003626	Atp5pd	641434	0.193251	14.2531	4.39711	0.000379406	0.0353695	0.271026
ENSRNOG00000003633	Rcvrn	140936	0.15716	5.1612	1.00681	0.327909	0.642763	-5.63471
ENSRNOG00000003634	Zfp354a	24522	0.071955	10.6392	1.19784	0.247144	0.561169	-5.43697
ENSRNOG00000003645	Hnrnpab	83498	0.0473048	14.3511	1.24927	0.228218	0.542351	-5.37879
ENSRNOG00000003649	Qsox1	84491	-0.21483	10.9578	-2.62136	0.0177003	0.153971	-3.23763
ENSRNOG00000003653	Fh	24368	0.103177	13.3152	1.43472	0.169209	0.469275	-5.15259
ENSRNOG00000003654	Cldn9	287099	-0.0831131	9.85073	-0.495363	0.626581	0.846608	-6.00806
ENSRNOG00000003661	Jpt1	287828	-0.113244	13.8929	-1.64113	0.118836	0.394957	-4.8728
ENSRNOG00000003668	Olr1404	405065	0.294843	6.82411	1.4352	0.169075	0.469275	-5.15197
ENSRNOG00000003669	Myocd	246297	0.0187022	5.13927	0.126703	0.900637	0.96102	-6.12283
ENSRNOG00000003670	Sumo2	690244	0.0480755	14.7775	0.75952	0.457773	0.744374	-5.84491
ENSRNOG00000003671	Prop1	266738	0.188505	5.82067	1.52559	0.145197	0.436324	-5.03288
ENSRNOG00000003673	Nup85	287830	-0.0465654	11.3353	-0.625991	0.539498	0.797955	-5.93557
ENSRNOG00000003674	Pir	363465	0.0571931	10.752	0.549659	0.589584	0.826475	-5.9799
ENSRNOG00000003680	Gabrb2	25451	-0.096425	12.7732	-0.694241	0.496755	0.769891	-5.89129
ENSRNOG00000003683	Glp2r	60432	-0.247762	5.44191	-1.71197	0.104781	0.37234	-4.77052
ENSRNOG00000003687	Rgs2	84583	0.0563918	12.7387	0.458985	0.651963	0.857584	-6.02533
ENSRNOG00000003689	Nono	317259	-0.0802462	14.1888	-1.60786	0.125974	0.404941	-4.91977
ENSRNOG00000003695	Mgat4d	304646	-0.187112	5.5441	-2.71408	0.0145794	0.141518	-3.06418
ENSRNOG00000003706	Ufc1	445268	-0.0855749	13.5499	-1.60393	0.12684	0.406009	-4.92526
ENSRNOG00000003709	Kmo	59113	-0.412312	5.88998	-3.69953	0.00173706	0.0607793	-1.12802
ENSRNOG00000003714	Clk4	287269	0.109856	12.1328	1.87911	0.0771948	0.321427	-4.5176
ENSRNOG00000003716	Batf3	60462	0.23606	8.1604	1.6261	0.122017	0.400179	-4.8941
ENSRNOG00000003718	Ambn	25376	0.0146211	4.45866	0.163051	0.872369	0.95166	-6.11752
ENSRNOG00000003720	Prrx1	266813	0.131255	10.7781	2.13774	0.0471036	0.249789	-4.09753
ENSRNOG00000003721	Paqr4	302967	-0.150192	12.6973	-3.04073	0.00727768	0.10646	-2.43735
ENSRNOG00000003728	Xylt2	64134	-0.217788	11.0943	-3.03407	0.00738271	0.106903	-2.45035
ENSRNOG00000003741	Nptx1	266777	-0.725144	13.3663	-4.20179	0.000579811	0.0383803	-0.119018
ENSRNOG00000003743	Dars	116483	0.126278	12.8073	2.25994	0.0370059	0.222983	-3.88843
ENSRNOG00000003745	Atf3	25389	-0.151902	7.68358	-0.61208	0.548451	0.803773	-5.94406
ENSRNOG00000003746	Gjb1	29584	0.112408	10.9871	0.665129	0.514743	0.78031	-5.91071
ENSRNOG00000003749	Xk	497078	-0.0790036	11.3893	-0.904433	0.378197	0.685877	-5.72822
ENSRNOG00000003759	Galc	314360	-0.0874993	11.568	-0.952638	0.353903	0.664711	-5.68531
ENSRNOG00000003763	Prdx4	85274	0.128052	11.1295	0.693492	0.497213	0.769977	-5.8918
ENSRNOG00000003765	Nr0b1	58850	-0.0343227	4.90602	-0.232321	0.819016	0.931731	-6.10374
ENSRNOG00000003772	Csrp2	29317	0.322433	11.4908	2.94426	0.0089497	0.114896	-2.62471
ENSRNOG00000003773	Hmox2	79239	-0.112334	13.4733	-2.34245	0.031364	0.206323	-3.74386
ENSRNOG00000003776	Amtn	689404	0.0594845	6.41409	0.392812	0.699259	0.877017	-6.05345
ENSRNOG00000003777	Chrne	29422	0.061623	6.98494	0.567434	0.577714	0.819221	-5.97007
ENSRNOG00000003779	Dedd	83631	0.299201	9.87187	1.63691	0.11972	0.396079	-4.87878
ENSRNOG00000003782	Acot9	302640	-0.122101	11.7918	-1.63705	0.119691	0.396079	-4.87859
ENSRNOG00000003800	Rgs9	29481	0.115821	11.8269	0.859956	0.401581	0.70545	-5.76602
ENSRNOG00000003802	Pttg1	64193	0.158177	8.87432	1.85863	0.0801895	0.326373	-4.54943
ENSRNOG00000003803	Zdhhc17	366889	-0.178487	11.7854	-2.6897	0.015345	0.145685	-3.11002
ENSRNOG00000003809	Sat1	302642	0.177002	13.485	2.99595	0.00801204	0.109798	-2.52451
ENSRNOG00000003812	Nlgn3	171297	-0.180187	13.5379	-2.89979	0.00984064	0.120098	-2.71048
ENSRNOG00000003813	Kcnk10	65272	-0.130756	7.87725	-0.978182	0.341474	0.654653	-5.66176
ENSRNOG00000003815	Slc25a11	64201	-0.0109805	14.0599	-0.212703	0.834046	0.937632	-6.10813
ENSRNOG00000003825	Wdr75	314545	-0.119184	11.3062	-1.24505	0.229725	0.54424	-5.38363
ENSRNOG00000003831	Tdp1	314380	-0.0576426	10.2499	-0.562517	0.580985	0.821654	-5.97282
ENSRNOG00000003833	Nenf	289380	0.108812	12.4667	1.21794	0.239609	0.554224	-5.41448
ENSRNOG00000003834	Map2k4	287398	0.0593913	13.0893	0.872577	0.394851	0.699249	-5.75547
ENSRNOG00000003837	Mif4gd	360659	0.179916	10.8951	2.25685	0.0372345	0.223642	-3.8938
ENSRNOG00000003841	Kcnh1	65198	-0.0868567	11.2462	-0.524767	0.60641	0.834218	-5.99316
ENSRNOG00000003846	Pitpna	29525	0.0644939	14.4318	1.62154	0.122995	0.40117	-4.90053
ENSRNOG00000003849	Stx8	59074	0.0409592	10.5423	0.532908	0.600881	0.831311	-5.98889
ENSRNOG00000003853	Scoc	364981	0.222405	12.4282	3.34608	0.00375834	0.0784546	-1.83536
ENSRNOG00000003855	Dnaja3	360481	-0.195437	12.6883	-3.05585	0.0070449	0.10395	-2.40785
ENSRNOG00000003864	Gipc1	83823	-0.277675	12.8106	-4.94305	0.0001177	0.0251188	1.34497
ENSRNOG00000003866	Cxcr4	60628	-0.036291	9.61469	-0.202553	0.841849	0.940298	-6.11025
ENSRNOG00000003869	Sod3	25352	-0.0295325	10.0582	-0.136968	0.892639	0.958118	-6.12146
ENSRNOG00000003872	NEWGENE_620180	170840	0.157638	9.89526	1.30529	0.2089	0.518932	-5.31312
ENSRNOG00000003873	Cpd	25306	-0.139787	13.0954	-1.41597	0.174548	0.477193	-5.17658
ENSRNOG00000003879	Rnf167	360554	0.0470881	14.0173	1.09328	0.289272	0.603886	-5.54888
ENSRNOG00000003880	Tph2	317675	-0.0806477	6.43291	-0.548595	0.590298	0.826851	-5.98048
ENSRNOG00000003881	Nit1	289222	-0.034499	13.5641	-0.631379	0.536052	0.7955	-5.93223
ENSRNOG00000003883	LOC317456	317456	-0.166192	6.01279	-2.06866	0.0538714	0.26998	-4.21286
ENSRNOG00000003884	Acmsd	171385	-0.0340037	5.79982	-0.359069	0.723891	0.889107	-6.06614
ENSRNOG00000003890	Nap1l1	89825	-0.0175843	13.2055	-0.289127	0.775922	0.912687	-6.08886
ENSRNOG00000003895	Rgs1	54289	0.0766714	5.70094	0.345087	0.734192	0.894976	-6.07107
ENSRNOG00000003899	Krt14	287701	-0.642511	6.97616	-2.13179	0.0476541	0.251099	-4.10754
ENSRNOG00000003901	Cfap36	289859	0.0340952	14.1607	0.761029	0.456895	0.74394	-5.84379
ENSRNOG00000003902	Fabp6	25440	-2.64071e-05	5.33875	-0.000208117	0.999836	0.99995	-6.13092
ENSRNOG00000003905	Nsf	60355	-0.0297278	14.7136	-0.492737	0.628398	0.846892	-6.00935
ENSRNOG00000003915	Tmem206	305070	-0.189156	10.9366	-2.82463	0.0115454	0.127636	-2.85457
ENSRNOG00000003918	Slc25a19	303676	-0.0641115	11.2581	-1.07638	0.296548	0.612103	-5.56613
ENSRNOG00000003919	Rps6kb1	83840	0.0446927	11.9146	0.854933	0.404281	0.707404	-5.77018
ENSRNOG00000003923	Rab21	299799	0.0542554	13.1324	1.3048	0.209063	0.519017	-5.3137
ENSRNOG00000003924	Pi4k2b	305419	-0.0750393	8.82532	-0.732617	0.473608	0.756296	-5.8645
ENSRNOG00000003927	Cd55	64036	-0.300912	10.4985	-1.80132	0.0891189	0.342671	-4.63726
ENSRNOG00000003928	Tmco1	289196	-0.0286798	13.1984	-0.569099	0.576609	0.819016	-5.96914
ENSRNOG00000003931	Arsg	303631	-0.0944585	10.47	-0.613952	0.547241	0.802884	-5.94293
ENSRNOG00000003946	Tor1aip1	246314	-0.0769012	11.0769	-1.62519	0.122211	0.400179	-4.89539
ENSRNOG00000003947	Ntn1	114523	-0.30357	7.49685	-1.75087	0.0976911	0.359225	-4.71308
ENSRNOG00000003948	Llgl1	54265	-0.23229	11.7029	-2.62111	0.0177095	0.153971	-3.23809
ENSRNOG00000003951	Psmc1	117263	0.0806627	13.2923	1.21801	0.239581	0.554224	-5.41439
ENSRNOG00000003954	Il2rg	140924	0.230126	8.74712	1.95335	0.067157	0.299328	-4.40039
ENSRNOG00000003955	Spata7	192225	-0.0119671	10.9192	-0.167615	0.868831	0.95039	-6.11676
ENSRNOG00000003958	Commd10	361323	-0.0913742	11.4885	-1.40702	0.177146	0.480318	-5.18796
ENSRNOG00000003959	Rgs18	289076	0.422794	5.75805	1.0014	0.330442	0.644672	-5.63988
ENSRNOG00000003960	Cltrn	57395	0.571421	7.22507	0.762009	0.456325	0.743664	-5.84307
ENSRNOG00000003964	Nsmce2	299957	0.192341	10.9927	2.86428	0.0106133	0.123978	-2.7787
ENSRNOG00000003965	Amelx	29160	0.0429717	4.6013	0.411525	0.685744	0.872683	-6.04593
ENSRNOG00000003967	Vmp1	192129	-0.0937066	14.0384	-1.93687	0.0692784	0.304516	-4.42665
ENSRNOG00000003969	Fam20a	303635	0.231361	9.69632	1.93404	0.0696495	0.305522	-4.43116
ENSRNOG00000003971	Gosr1	94189	-0.145459	11.4847	-1.36578	0.189514	0.49562	-5.23959
ENSRNOG00000003972	Tshr	25360	-0.135598	7.46573	-0.918442	0.371024	0.680246	-5.71596
ENSRNOG00000003973	Cyb5r1	304805	-0.120383	12.7807	-1.48619	0.155238	0.450306	-5.08548
ENSRNOG00000003975	Pfn1	64303	0.0273912	14.7686	0.528697	0.603738	0.832922	-5.99111
ENSRNOG00000003977	Dusp1	114856	-0.183976	11.9469	-0.846647	0.408759	0.709706	-5.77699
ENSRNOG00000003980	Ttc1	287208	0.133645	13.1013	2.02793	0.0582649	0.280738	-4.27983
ENSRNOG00000003981	Zfp18	303226	0.0093233	10.8112	0.135136	0.894065	0.958847	-6.12171
ENSRNOG00000003984	Apln	58812	0.130384	12.0886	1.76581	0.0950797	0.354994	-4.69077
ENSRNOG00000003985	Tmem19	299800	0.020726	11.4496	0.409111	0.687482	0.873045	-6.04692
ENSRNOG00000003988	Dnajc27	298859	-0.105903	12.4159	-1.162	0.261026	0.574762	-5.47631
ENSRNOG00000003990	Grb2	81504	-0.0296559	13.9632	-0.675084	0.508551	0.776453	-5.90416
ENSRNOG00000003992	Pik3r6	497932	-0.126396	6.13682	-1.40056	0.179036	0.483039	-5.19611
ENSRNOG00000003999	Adcy3	64508	-0.174118	12.5515	-2.23722	0.0387169	0.228514	-3.92777
ENSRNOG00000004000	Tefm	287554	0.112683	10.2598	1.45202	0.164403	0.463316	-5.13023
ENSRNOG00000004001	Osgepl1	314548	0.141229	10.0918	2.31066	0.0334356	0.214466	-3.79987
ENSRNOG00000004006	Dnajb9	24908	0.167313	12.9531	3.59244	0.00219552	0.0636115	-1.34303
ENSRNOG00000004009	Xpnpep2	117522	0.013053	6.60469	0.137182	0.892472	0.958118	-6.12143
ENSRNOG00000004013	Grip1	84016	-0.131273	12.0278	-1.98546	0.0631896	0.2914	-4.34883
ENSRNOG00000004016	Msl3	317464	0.106842	11.8365	1.97229	0.0647896	0.294365	-4.37003
ENSRNOG00000004019	Phlda1	29380	-0.0437902	12.5463	-0.380159	0.708457	0.883194	-6.05834
ENSRNOG00000004026	Atp2b1	29598	-0.0846142	14.7348	-0.82477	0.420736	0.717692	-5.79468
ENSRNOG00000004027	Aldh9a1	64040	0.006769	12.5444	0.138447	0.891487	0.957948	-6.12126
ENSRNOG00000004030	Nphs2	170672	0.252559	4.58536	2.16652	0.04452	0.244272	-4.04885
ENSRNOG00000004049	Baiap2	117542	-0.211126	13.4082	-2.77379	0.0128566	0.133788	-2.95133
ENSRNOG00000004050	Snrk	170837	-0.0810144	12.1658	-0.994717	0.333593	0.647823	-5.64623
ENSRNOG00000004060	Calm1	24242	0.0316542	14.9281	0.34311	0.735652	0.896118	-6.07175
ENSRNOG00000004062	C4bpa	24235	-0.286908	5.60142	-3.29895	0.00416397	0.0820242	-1.929
ENSRNOG00000004067	Nrcam	497815	-0.123475	14.2825	-2.27781	0.0357096	0.219725	-3.85735
ENSRNOG00000004072	Myo1c	65261	0.0496671	12.011	0.423139	0.677411	0.868622	-6.04109
ENSRNOG00000004076	Pms1	494322	-0.0041029	10.3192	-0.0739909	0.941867	0.977888	-6.12816
ENSRNOG00000004077	Kcnc2	246153	0.0356743	13.0917	0.290116	0.775179	0.912418	-6.08857
ENSRNOG00000004078	Eno3	25438	0.0335967	10.7299	0.324092	0.749757	0.902465	-6.07811
ENSRNOG00000004083	Zc3h14	192359	0.0260555	12.8121	0.596721	0.558428	0.809571	-5.95322
ENSRNOG00000004089	Enpp2	84050	0.135496	14.3949	0.698966	0.49387	0.768457	-5.88807
ENSRNOG00000004100	Trib1	78969	-0.0377046	10.6022	-0.485506	0.633413	0.849271	-6.01286
ENSRNOG00000004107	Rpl23	29282	0.189169	14.4765	4.2484	0.000523909	0.0365104	-0.0257538
ENSRNOG00000004111	Soat1	81782	-0.125578	11.8414	-1.53916	0.141867	0.43079	-5.01452
ENSRNOG00000004117	Kcnv1	60326	-0.285901	10.5636	-1.66018	0.114906	0.389637	-4.84559
ENSRNOG00000004124	Grpr	24938	-0.604031	6.69835	-2.67292	0.0158937	0.14805	-3.14146
ENSRNOG00000004125	C4bpb	24236	0.0740089	6.27111	0.556151	0.585234	0.824118	-5.97635
ENSRNOG00000004131	Pkn1	29355	0.055246	12.53	1.11814	0.278804	0.592676	-5.52306
ENSRNOG00000004132	Lasp1	29278	-0.170176	12.7852	-1.12504	0.27595	0.589238	-5.51581
ENSRNOG00000004133	Slc7a3	29485	0.326095	10.364	1.56927	0.134705	0.418246	-4.97337
ENSRNOG00000004135	RGD1311745	301079	0.202114	11.9397	3.2633	0.00449913	0.0828072	-1.99967
ENSRNOG00000004139	Ndel1	170845	0.0309167	12.9552	0.359385	0.723659	0.889107	-6.06603
ENSRNOG00000004143	Adipor1	289036	0.0758874	14.1303	1.16942	0.258106	0.572023	-5.46825
ENSRNOG00000004155	Samd14	287637	-0.0199956	10.7634	-0.113579	0.91088	0.964944	-6.12442
ENSRNOG00000004159	Flii	287375	0.0537	12.7251	1.14494	0.267838	0.580896	-5.49468
ENSRNOG00000004160	Prps2	24689	-0.0227818	11.5406	-0.140554	0.889847	0.957015	-6.12096
ENSRNOG00000004161	Mtif2	305606	-0.0303574	11.284	-0.409321	0.68733	0.873045	-6.04684
ENSRNOG00000004162	Pfkfb2	24640	0.0375501	10.8851	0.706067	0.489553	0.766116	-5.88318
ENSRNOG00000004168	Slc35e4	266687	-0.0733455	11.4891	-1.01755	0.322922	0.638243	-5.62439
ENSRNOG00000004172	Pdk2	81530	-0.146016	14.1155	-2.10845	0.0498718	0.257937	-4.14668
ENSRNOG00000004181	Sdccag8	305002	0.12169	11.5899	2.00285	0.0611295	0.287325	-4.32068
ENSRNOG00000004188	LOC298795	298795	0.184188	8.3604	0.997796	0.33214	0.64585	-5.64331
ENSRNOG00000004193	Klhl12	266772	-0.0744896	12.6483	-0.994198	0.333838	0.647861	-5.64672
ENSRNOG00000004196	Rps29	25348	0.115016	14.2195	2.47927	0.0237443	0.179757	-3.49867
ENSRNOG00000004197	Asb12	503446	0.150197	6.40455	1.11728	0.27916	0.5933	-5.52396
ENSRNOG00000004201	Rims2	116839	0.122368	10.029	1.76062	0.0959806	0.356265	-4.69854
ENSRNOG00000004212	Fbxw9	288921	-0.0306639	10.0439	-0.476127	0.639945	0.852909	-6.01735
ENSRNOG00000004219	Dhps	288923	-0.0630493	11.296	-0.879756	0.391056	0.695978	-5.7494
ENSRNOG00000004220	Ebag9	299864	0.16319	12.9826	1.67431	0.112064	0.385118	-4.82528
ENSRNOG00000004222	S100g	24249	0.020052	5.1393	0.0719543	0.943464	0.978692	-6.12831
ENSRNOG00000004225	Odf4	303236	0.154192	5.09018	1.2419	0.230857	0.54563	-5.38724
ENSRNOG00000004229	Tac3	29191	0.375042	9.74548	1.26238	0.223576	0.538079	-5.36363
ENSRNOG00000004234	Mgat2	94273	0.0223306	12.4058	0.341224	0.737047	0.896272	-6.0724
ENSRNOG00000004249	Tlr7	317468	-0.0543758	7.74304	-0.484178	0.634336	0.849391	-6.01351
ENSRNOG00000004255	Usf1	83586	-0.145082	12.7064	-2.45272	0.0250713	0.183699	-3.54675
ENSRNOG00000004257	Ctps2	619580	0.0262578	12.313	0.327205	0.747442	0.901051	-6.07709
ENSRNOG00000004258	Chst7	302302	-0.579869	5.66213	-2.1037	0.0503351	0.259475	-4.15463
ENSRNOG00000004259	Dohh	314644	-0.106878	11.5672	-1.6535	0.11627	0.391581	-4.85515
ENSRNOG00000004268	Zfp386	25165	0.0551531	9.12671	0.561291	0.581802	0.822322	-5.97351
ENSRNOG00000004269	Myt1l	116668	-0.230416	13.2443	-3.7893	0.00142731	0.0574054	-0.947575
ENSRNOG00000004280	Tcn2	64365	0.0324824	12.7162	0.223449	0.825805	0.934136	-6.10577
ENSRNOG00000004282	Arl4a	29308	0.15873	10.8562	0.956449	0.35203	0.663151	-5.68183
ENSRNOG00000004284	Btg1	29618	0.0289703	11.8377	0.516745	0.611881	0.836794	-5.99731
ENSRNOG00000004287	Wdr83	288924	0.0312504	12.2223	0.391225	0.70041	0.877423	-6.05407
ENSRNOG00000004288	Ptrh2	287593	0.00839814	11.9096	0.130229	0.897888	0.960133	-6.12237
ENSRNOG00000004291	Cltc	54241	0.00685705	14.6335	0.111542	0.912472	0.965212	-6.12465
ENSRNOG00000004292	Sptssa	500651	0.181087	13.3693	2.229	0.0393539	0.230102	-3.94196
ENSRNOG00000004294	Ascl1	64186	-0.141593	7.7599	-0.934036	0.363148	0.673647	-5.7021
ENSRNOG00000004296	Nt5c1b	298881	0.0395763	4.96952	0.246666	0.808072	0.926454	-6.10029
ENSRNOG00000004298	Dpys	65135	0.0200247	6.52723	0.223425	0.825823	0.934136	-6.10578
ENSRNOG00000004300	Gtf2a1	83830	-0.123429	11.6721	-1.59409	0.129033	0.40889	-4.939
ENSRNOG00000004302	Pah	24616	-0.185994	8.22079	-0.827356	0.419309	0.717062	-5.79261
ENSRNOG00000004303	Timp3	25358	0.0146747	13.4108	0.140692	0.889739	0.957007	-6.12094
ENSRNOG00000004304	Syap1	302678	0.0872356	11.2312	1.15536	0.263661	0.576341	-5.48348
ENSRNOG00000004307	Tor3a	304884	0.0767594	11.0515	1.20551	0.244249	0.557407	-5.42843
ENSRNOG00000004311	Gpr182	29307	0.0574244	9.9336	0.509985	0.616511	0.840074	-6.00075
ENSRNOG00000004312	Tmbim4	362884	0.0986075	11.6951	1.23092	0.234838	0.549725	-5.39978
ENSRNOG00000004317	Vipr2	29555	0.322484	9.38969	2.90961	0.00963683	0.118987	-2.69158
ENSRNOG00000004320	Tgm4	64679	-0.0923617	4.94574	-0.857523	0.402887	0.706591	-5.76803
ENSRNOG00000004322	Sh3kbp1	84357	0.213744	13.269	4.15581	0.000640883	0.0393934	-0.211149
ENSRNOG00000004327	Ddc	24311	0.0135567	10.0999	0.0832393	0.934617	0.975662	-6.12743
ENSRNOG00000004330	Chrdl1	363455	0.101271	10.2031	1.06513	0.301469	0.617847	-5.5775
ENSRNOG00000004332	Egfr	24329	0.109941	10.5018	1.02598	0.319043	0.634094	-5.61622
ENSRNOG00000004339	Yy1	24919	-0.00906516	11.2879	-0.173588	0.864206	0.949165	-6.11574
ENSRNOG00000004342	Ahr	25690	-0.111645	9.53952	-0.808786	0.429628	0.725459	-5.80734
ENSRNOG00000004344	Zdhhc3	301081	-0.0510055	12.096	-1.01911	0.322202	0.637581	-5.62289
ENSRNOG00000004346	Notch3	56761	-0.460843	8.18619	-2.57292	0.0195747	0.163385	-3.32731
ENSRNOG00000004351	Slc25a29	314441	-0.0250056	9.0061	-0.315553	0.756119	0.90393	-6.08085
ENSRNOG00000004356	Lrrc52	289199	3.03213e-05	5.99383	0.000179549	0.999859	0.99995	-6.13092
ENSRNOG00000004359	Wars	314442	-0.16667	13.1761	-2.78133	0.0126534	0.132462	-2.93701
ENSRNOG00000004360	Gemin2	84404	0.0172155	11.1713	0.278162	0.784187	0.915814	-6.09198
ENSRNOG00000004364	Babam2	362704	-0.121032	12.684	-1.69475	0.108058	0.377846	-4.79566
ENSRNOG00000004373	Ddx39a	89827	0.12082	10.5254	1.88489	0.0763686	0.320399	-4.50858
ENSRNOG00000004377	Lpin1	313977	0.0896117	11.3443	1.21798	0.239594	0.554224	-5.41443
ENSRNOG00000004378	Abca5	286970	-0.180624	9.88077	-2.12021	0.0487433	0.254742	-4.127
ENSRNOG00000004380	Il12b	64546	-0.012016	6.23867	-0.0784148	0.938399	0.977255	-6.12782
ENSRNOG00000004390	Alx1	25401	-0.247656	6.73804	-1.77202	0.0940135	0.352532	-4.68147
ENSRNOG00000004400	Avpr1a	25107	-0.207065	6.98066	-1.23415	0.233659	0.548176	-5.3961
ENSRNOG00000004401	Mrpl13	299938	0.0156255	12.3543	0.279318	0.783315	0.91558	-6.09166
ENSRNOG00000004404	Tac4	282829	-0.253077	5.91899	-2.14597	0.0463506	0.248762	-4.08364
ENSRNOG00000004405	Pigr	25046	-0.107129	6.51676	-1.25238	0.227109	0.541139	-5.3752
ENSRNOG00000004410	Pax6	25509	0.24469	11.3437	3.54952	0.0024115	0.0668209	-1.42909
ENSRNOG00000004411	Tspan8	171048	0.328576	10.3187	4.04549	0.000815215	0.0436552	-0.432505
ENSRNOG00000004414	F11r	116479	0.0758844	10.2594	0.589138	0.563389	0.811212	-5.95766
ENSRNOG00000004420	Rad21	314949	-0.0151907	14.0094	-0.2743	0.787105	0.916351	-6.09306
ENSRNOG00000004421	Rxylt1	299841	0.0745624	11.5884	1.55534	0.13798	0.424678	-4.99248
ENSRNOG00000004423	Zbtb18	64619	-0.232819	13.7776	-2.78145	0.0126502	0.132462	-2.93678
ENSRNOG00000004424	Rabif	304807	0.0991758	11.8712	1.3685	0.188677	0.495343	-5.23622
ENSRNOG00000004437	Map2k6	114495	0.0574179	13.0063	1.02979	0.317299	0.632351	-5.6125
ENSRNOG00000004438	Cntn1	117258	-0.106507	14.7436	-1.64735	0.11754	0.392695	-4.86394
ENSRNOG00000004440	Fignl1	289777	-0.155955	7.07241	-1.64821	0.117362	0.392661	-4.86271
ENSRNOG00000004441	Fcmr	548326	-0.0955182	6.32023	-0.323465	0.750223	0.902465	-6.07831
ENSRNOG00000004451	Mc3r	29310	0.81338	6.85236	2.1867	0.0427874	0.239629	-4.01451
ENSRNOG00000004456	Clhc1	289865	-0.273973	5.29256	-1.69996	0.107058	0.376005	-4.78807
ENSRNOG00000004464	Sel1l	314352	-0.448366	13.4151	-5.78372	2.06173e-05	0.0151172	2.92916
ENSRNOG00000004470	Il24	170819	0.127938	4.61013	0.999443	0.331364	0.644999	-5.64174
ENSRNOG00000004473	Ppargc1a	83516	0.0657611	12.3094	1.00197	0.330176	0.644672	-5.63934
ENSRNOG00000004474	Klhdc2	299113	0.0796965	12.6667	1.22189	0.238147	0.5535	-5.41001
ENSRNOG00000004476	Wif1	114557	0.0711035	9.08366	0.513499	0.614102	0.838609	-5.99897
ENSRNOG00000004477	Ublcp1	360514	0.105816	13.3429	1.9163	0.0720106	0.311013	-4.45924
ENSRNOG00000004479	Aurka	261730	0.0839835	11.6554	0.972223	0.344347	0.657251	-5.66731
ENSRNOG00000004483	Ptprr	94202	-0.0666209	11.0724	-0.66066	0.517538	0.782298	-5.91362
ENSRNOG00000004484	LOC108348189	245974	-0.0121598	10.886	-0.232178	0.819126	0.931731	-6.10377
ENSRNOG00000004488	Bdkrb1	81509	-0.0125181	4.89926	-0.111454	0.91254	0.965212	-6.12466
ENSRNOG00000004489	Adgre5	361383	0.228402	11.0803	1.84677	0.0819693	0.330273	-4.56775
ENSRNOG00000004492	Mterf3	299514	-0.0763176	9.74896	-1.18156	0.253378	0.56833	-5.45496
ENSRNOG00000004493	Tasp1	311468	-0.0319695	10.3923	-0.413455	0.684357	0.871864	-6.04514
ENSRNOG00000004494	Lta4h	299732	-0.146741	12.2828	-2.76759	0.013026	0.134814	-2.96309
ENSRNOG00000004496	Rock2	25537	-0.116593	13.1719	-1.57671	0.132984	0.416154	-4.96311
ENSRNOG00000004498	Scin	298975	-0.147474	5.69129	-1.10149	0.285784	0.599228	-5.54041
ENSRNOG00000004499	Gpr135	314213	-0.30504	7.5065	-1.89516	0.0749182	0.316964	-4.4925
ENSRNOG00000004500	Myc	24577	-0.251141	9.94558	-2.52764	0.0214957	0.171462	-3.4105
ENSRNOG00000004502	Hal	29301	-0.387128	6.34136	-1.64902	0.117194	0.392435	-4.86155
ENSRNOG00000004505	Nfic	29228	-0.427947	12.3917	-2.85244	0.0108837	0.124903	-2.80139
ENSRNOG00000004510	Slc35b1	287642	-0.111444	14.4451	-1.86739	0.0788963	0.323597	-4.53584
ENSRNOG00000004512	Apool	317191	0.0835895	11.0379	1.02076	0.32144	0.636987	-5.62129
ENSRNOG00000004515	Pes1	289740	0.0580395	13.1381	1.41715	0.174208	0.477033	-5.17508
ENSRNOG00000004516	Itgbl1	498564	-0.49974	12.2431	-2.11138	0.0495884	0.257169	-4.14179
ENSRNOG00000004517	Igf1	24482	0.0513735	10.2337	0.428986	0.673231	0.866843	-6.03861
ENSRNOG00000004518	Cacnb1	50688	-0.194684	12.9589	-2.13604	0.0472596	0.250185	-4.10038
ENSRNOG00000004524	Desi2	289277	0.226156	11.7098	4.64469	0.000222446	0.0311817	0.761537
ENSRNOG00000004527	Lin7a	85327	0.144679	11.3717	1.39447	0.180837	0.486108	-5.20379
ENSRNOG00000004532	Dipk1b	362090	-0.0144504	11.1946	-0.168893	0.867841	0.94987	-6.11655
ENSRNOG00000004534	Spdya	192209	0.0468505	8.87209	0.418228	0.680929	0.870219	-6.04316
ENSRNOG00000004535	Kcng3	171011	-0.107192	8.69566	-0.298972	0.768525	0.91035	-6.08596
ENSRNOG00000004537	Rxrg	83574	-0.168691	11.2724	-0.456752	0.653536	0.858511	-6.02635
ENSRNOG00000004544	Ube2e3	295686	-0.113409	13.6527	-1.97674	0.0642454	0.293993	-4.36288
ENSRNOG00000004549	Dhx40	287595	0.0606799	12.5401	1.21184	0.241877	0.555591	-5.42134
ENSRNOG00000004554	Dcn	29139	-0.162864	11.9774	-0.641566	0.52957	0.790581	-5.92585
ENSRNOG00000004560	Cacna1b	257648	-0.305444	11.4696	-3.21946	0.00494798	0.0865398	-2.0864
ENSRNOG00000004572	Zfp472	314587	-0.192949	8.24053	-1.27692	0.218514	0.532977	-5.34666
ENSRNOG00000004575	Il1a	24493	0.0434051	6.30372	0.299597	0.768056	0.910246	-6.08577
ENSRNOG00000004577	Fez2	94269	0.0728032	12.5352	1.51293	0.148362	0.441703	-5.04988
ENSRNOG00000004578	Cthrc1	282836	0.183435	7.03187	1.15508	0.263774	0.576341	-5.48379
ENSRNOG00000004581	Zdhhc9	302808	-0.0687432	13.5863	-0.644202	0.527899	0.789118	-5.92418
ENSRNOG00000004583	Mb	59108	-0.0649257	7.57968	-0.45792	0.652713	0.858041	-6.02582
ENSRNOG00000004610	Lum	81682	-0.218468	11.1623	-0.90248	0.379204	0.686727	-5.72991
ENSRNOG00000004612	Ppp1cb	25594	0.129845	14.0037	2.64227	0.0169454	0.151271	-3.19873
ENSRNOG00000004613	Gpm6b	192179	0.0419667	15.2488	0.720594	0.48079	0.760361	-5.87304
ENSRNOG00000004616	Npm1	25498	0.162183	13.6726	3.83453	0.00129281	0.0544767	-0.856602
ENSRNOG00000004621	Rtn4	83765	-0.118598	12.6403	-1.39427	0.180898	0.486123	-5.20405
ENSRNOG00000004624	Rnd3	295588	0.273909	12.543	3.65538	0.00191324	0.062016	-1.21673
ENSRNOG00000004626	Slc34a2	84395	0.276195	5.43183	1.94242	0.0685573	0.302792	-4.41782
ENSRNOG00000004628	Dazap2	300235	-0.0808208	13.4727	-1.33786	0.198277	0.505077	-5.27387
ENSRNOG00000004632	Pmch	24659	0.39115	7.73703	2.68232	0.0155841	0.146715	-3.12386
ENSRNOG00000004637	Fbxo7	366854	0.0696466	13.3067	1.51466	0.147927	0.441326	-5.04757
ENSRNOG00000004640	Mtfp1	289745	-0.234317	10.1332	-1.22186	0.238158	0.5535	-5.41005
ENSRNOG00000004641	Sstr4	25555	-0.433152	10.6943	-2.47394	0.0240055	0.179944	-3.50835
ENSRNOG00000004645	Galnt5	83627	-0.195827	5.80267	-0.874574	0.393793	0.698221	-5.75379
ENSRNOG00000004646	Tpo	54314	0.0347255	7.00433	0.227286	0.822868	0.933131	-6.1049
ENSRNOG00000004647	Il10	25325	0.227312	5.56048	2.16912	0.0442935	0.244272	-4.04444
ENSRNOG00000004649	Il1b	24494	0.0180343	5.75937	0.0954554	0.925051	0.970565	-6.12633
ENSRNOG00000004650	Begain	79146	-0.562446	10.4733	-3.03974	0.00729318	0.10646	-2.43928
ENSRNOG00000004659	Creld2	362978	0.0528988	11.2193	0.703187	0.491301	0.767062	-5.88517
ENSRNOG00000004666	Prr5l	362171	-0.0250024	8.48726	-0.149996	0.882503	0.955134	-6.11958
ENSRNOG00000004670	Ddx56	289780	-0.224941	11.0225	-1.84774	0.0818225	0.330273	-4.56625
ENSRNOG00000004672	Sec14l2	116486	-0.159009	12.0598	-1.99598	0.0619362	0.28947	-4.33182
ENSRNOG00000004673	Rbm43	311020	0.278324	9.07092	2.14898	0.0460788	0.248289	-4.07856
ENSRNOG00000004676	Pak3	29433	0.0585569	13.5581	0.938009	0.36116	0.671591	-5.69854
ENSRNOG00000004677	Zeb2	311071	-0.12656	13.1581	-0.922581	0.368922	0.677958	-5.7123
ENSRNOG00000004678	Itln1	498284	-0.0391124	7.92605	-0.170017	0.86697	0.949776	-6.11635
ENSRNOG00000004687	Thbd	83580	-0.0922204	8.58231	-0.826721	0.41966	0.717107	-5.79312
ENSRNOG00000004688	Rbfox2	362950	-0.053127	14.1612	-0.870454	0.395978	0.700272	-5.75725
ENSRNOG00000004692	A1bg	140656	-0.210635	5.93	-1.33327	0.199745	0.506913	-5.27943
ENSRNOG00000004696	Arhgap5	299012	0.13405	12.7498	2.6567	0.0164424	0.149927	-3.1718
ENSRNOG00000004697	Baalc	140720	0.016596	12.8555	0.347597	0.732339	0.894039	-6.0702
ENSRNOG00000004698	Cd244	64025	-0.155831	8.77743	-1.01825	0.322597	0.638098	-5.62371
ENSRNOG00000004699	Fibin	499856	-0.203335	9.40938	-0.774787	0.448933	0.739327	-5.8335
ENSRNOG00000004703	Muc15	690914	-0.159352	5.38781	-1.14861	0.26636	0.579535	-5.49074
ENSRNOG00000004708	Aard	246323	0.212111	10.0709	1.74192	0.0992841	0.362547	-4.72637
ENSRNOG00000004711	Mta1	64520	0.0101451	13.768	0.216592	0.831062	0.936165	-6.10729
ENSRNOG00000004713	Kcnj16	29719	0.548896	11.3001	2.37039	0.0296429	0.199873	-3.69432
ENSRNOG00000004720	Kcnj2	29712	0.0322865	4.89725	0.294458	0.771914	0.911481	-6.0873
ENSRNOG00000004723	Fcf1	299198	0.0965996	12.087	1.53142	0.143758	0.43454	-5.025
ENSRNOG00000004725	Cela1	24331	0.103204	5.0937	1.15623	0.263316	0.576108	-5.48254
ENSRNOG00000004726	Mapkapk2	289014	-0.0281654	12.6218	-0.429113	0.673141	0.866843	-6.03855
ENSRNOG00000004737	Cd48	245962	0.210173	12.7126	2.13116	0.0477124	0.251186	-4.1086
ENSRNOG00000004740	Mmadhc	362134	-0.0447916	12.9979	-0.859433	0.401862	0.70545	-5.76645
ENSRNOG00000004741	Rpl19	81767	0.06198	14.2365	1.10882	0.282696	0.596833	-5.5328
ENSRNOG00000004742	Chp1	64152	0.00995486	14.3749	0.193111	0.849122	0.943358	-6.11213
ENSRNOG00000004749	Slc30a1	58976	-0.148011	11.7741	-1.70387	0.106312	0.375011	-4.78237
ENSRNOG00000004752	Nalcn	266760	0.014518	12.6433	0.282903	0.78061	0.914662	-6.09065
ENSRNOG00000004754	Tc2n	500707	-0.208546	7.97236	-0.437934	0.666856	0.864559	-6.03474
ENSRNOG00000004755	Commd9	295956	0.0794921	12.4304	1.62895	0.121408	0.399424	-4.89007
ENSRNOG00000004756	Syt2	24805	0.173381	8.90855	0.621003	0.542699	0.800177	-5.93864
ENSRNOG00000004757	Tmem158	117582	0.113248	11.4805	1.40175	0.178688	0.482588	-5.19462
ENSRNOG00000004763	Sirpa	25528	-0.121594	14.4219	-1.76885	0.0945565	0.353733	-4.68622
ENSRNOG00000004772	Cytip	311047	-0.0845452	5.47429	-0.428312	0.673712	0.867189	-6.0389
ENSRNOG00000004775	Cstf1	311670	-0.137324	12.0269	-2.35487	0.0305878	0.203747	-3.72187
ENSRNOG00000004778	Cnga1	85259	0.313906	5.81738	1.81439	0.0870099	0.339353	-4.6174
ENSRNOG00000004781	Crmp1	25415	-0.175401	13.81	-3.44688	0.00301726	0.0731666	-1.63443
ENSRNOG00000004786	Cyp4f1	56266	0.134295	9.64203	2.19063	0.0424568	0.238796	-4.00779
ENSRNOG00000004789	Utp25	305076	-0.0277842	11.0457	-0.366564	0.718392	0.886862	-6.06342
ENSRNOG00000004791	Arf6	79121	-0.0629504	11.9939	-1.15956	0.261991	0.575538	-5.47894
ENSRNOG00000004793	Ncln	314648	-0.172162	11.7231	-2.72563	0.0142298	0.139402	-3.04242
ENSRNOG00000004794	Rtn1	116644	-0.0212578	14.9288	-0.458755	0.652125	0.857584	-6.02544
ENSRNOG00000004806	Strn	29149	-0.0651341	12.4085	-0.81379	0.426832	0.723043	-5.8034
ENSRNOG00000004807	Arf2	79119	0.0906285	11.8993	1.69037	0.108905	0.379139	-4.80202
ENSRNOG00000004808	Cst11	245916	-0.167033	5.05727	-1.33819	0.198169	0.505077	-5.27345
ENSRNOG00000004810	Plcb1	24654	-0.156376	13.1697	-1.94319	0.0684578	0.30271	-4.4166
ENSRNOG00000004813	Rtcb	362855	0.0795438	13.1475	1.52712	0.144819	0.435834	-5.03082
ENSRNOG00000004814	Elob	81807	0.115678	13.2873	1.9092	0.0729764	0.312494	-4.47045
ENSRNOG00000004820	Sar1b	287276	-0.0207921	13.4132	-0.315467	0.756183	0.90393	-6.08087
ENSRNOG00000004828	Acvr1c	245921	-0.228618	11.7766	-1.49333	0.153375	0.448391	-5.07601
ENSRNOG00000004839	B4galnt1	64828	-0.14777	13.3653	-1.7806	0.0925568	0.348658	-4.66858
ENSRNOG00000004841	Akap6	64553	-0.113053	12.1779	-1.31595	0.205374	0.514379	-5.30035
ENSRNOG00000004846	Atp6v1c1	299971	0.050396	14.5031	0.762158	0.456239	0.743664	-5.84296
ENSRNOG00000004852	Sel1l2	311470	0.0663909	5.05335	0.527519	0.604538	0.833042	-5.99173
ENSRNOG00000004854	Has2	25694	0.159063	8.02722	1.26475	0.222744	0.537247	-5.36087
ENSRNOG00000004858	LOC257643	257643	-0.297143	5.88478	-3.31467	0.00402409	0.0808527	-1.89779
ENSRNOG00000004860	Myh9	25745	-0.126725	12.8631	-1.4645	0.161004	0.459074	-5.11397
ENSRNOG00000004863	Mpped2	362185	-0.138002	12.9431	-1.37305	0.187286	0.494244	-5.23058
ENSRNOG00000004870	Dyrk3	304775	-0.0672592	10.3235	-0.703298	0.491233	0.767062	-5.88509
ENSRNOG00000004873	Prkch	81749	0.230727	9.66588	1.17888	0.254417	0.569283	-5.45791
ENSRNOG00000004875	Ccer1	500825	-0.0296865	5.22019	-0.310408	0.759962	0.905725	-6.08246
ENSRNOG00000004878	Myf6	25714	-0.0265504	6.08283	-0.200967	0.843069	0.94089	-6.11057
ENSRNOG00000004882	Capn6	83685	0.169624	9.22811	1.12329	0.276672	0.589853	-5.51765
ENSRNOG00000004888	Spred2	305539	-0.14502	9.80016	-1.98313	0.0634695	0.292267	-4.35258
ENSRNOG00000004890	Adcy8	29241	0.438934	10.154	2.27008	0.036265	0.220739	-3.87081
ENSRNOG00000004891	Arl14ep	311279	-0.151111	11.0306	-1.84747	0.0818634	0.330273	-4.56667
ENSRNOG00000004893	Dmac2l	362749	-0.0345461	9.53857	-0.320425	0.752486	0.903152	-6.07929
ENSRNOG00000004898	Fshb	25447	0.157748	5.72057	1.70157	0.106749	0.375196	-4.78572
ENSRNOG00000004899	Kcns3	83588	-0.27806	9.98114	-1.40676	0.177222	0.480318	-5.18829
ENSRNOG00000004900	Crhr1	58959	0.199159	8.48056	0.758071	0.458618	0.744967	-5.84598
ENSRNOG00000004903	Ebp	117278	-0.0820377	10.3202	-0.762928	0.455791	0.743664	-5.84238
ENSRNOG00000004904	Pa2g4	288778	0.126396	13.8246	2.79585	0.012271	0.131868	-2.90941
ENSRNOG00000004909	Cnot2	299805	-0.00854112	13.499	-0.161211	0.873796	0.951888	-6.11782
ENSRNOG00000004910	Eif2d	498225	-0.210723	10.8634	-2.65199	0.016605	0.150742	-3.1806
ENSRNOG00000004918	Kcna4	25469	-0.0693003	12.1657	-0.909068	0.375813	0.68394	-5.72418
ENSRNOG00000004920	Olr750	296003	-0.160897	4.94619	-0.978697	0.341227	0.654442	-5.66128
ENSRNOG00000004925	Ppp1r12a	116670	-0.0762586	12.7467	-1.36769	0.188925	0.49558	-5.23722
ENSRNOG00000004926	Mettl15	295985	-0.0633704	9.71303	-0.638845	0.531297	0.791887	-5.92756
ENSRNOG00000004936	Sdc2	25615	0.0869798	13.8636	1.12401	0.276375	0.589531	-5.51689
ENSRNOG00000004938	Olr758	296010	0.157703	4.25934	1.74373	0.0989602	0.361968	-4.72369
ENSRNOG00000004946	Cst12	266776	-0.0508156	4.86249	-0.693125	0.497438	0.769977	-5.89205
ENSRNOG00000004958	Slc22a22	299944	0.112749	4.86833	1.24443	0.229947	0.544425	-5.38434
ENSRNOG00000004959	Actr2	289820	-0.153858	14.84	-1.87238	0.0781687	0.322861	-4.52809
ENSRNOG00000004962	Prdm4	170820	0.0489961	11.3813	0.810525	0.428655	0.724617	-5.80598
ENSRNOG00000004964	Erbb3	29496	0.0893337	11.4459	0.575289	0.572508	0.817305	-5.96563
ENSRNOG00000004972	Upp1	289801	-0.0116112	9.29658	-0.124293	0.902517	0.96185	-6.12313
ENSRNOG00000004978	Prkacb	293508	-0.0727024	14.5838	-0.88427	0.388683	0.694379	-5.74557
ENSRNOG00000004989	Cst8	29679	0.114511	6.48832	1.10002	0.286406	0.600269	-5.54193
ENSRNOG00000004992	Rab1a	81754	0.0930566	14.4607	2.14916	0.0460621	0.248289	-4.07825
ENSRNOG00000004993	Olr778	404796	-0.2017	5.3552	-1.25738	0.225337	0.539179	-5.36942
ENSRNOG00000004996	Zcrb1	362990	0.158064	12.1413	2.8159	0.011761	0.128562	-2.87122
ENSRNOG00000004998	Jakmip1	305434	0.0249852	13.4985	0.430455	0.672183	0.866078	-6.03798
ENSRNOG00000005003	Ptprn2	29714	-0.0208067	13.1852	-0.164141	0.871524	0.95162	-6.11734
ENSRNOG00000005007	Scn3a	497770	0.101664	11.4442	0.989209	0.336204	0.650478	-5.65143
ENSRNOG00000005012	Utp14a	317579	0.153527	9.90508	2.91269	0.00957377	0.118824	-2.68565
ENSRNOG00000005015	Rabep1	54190	-0.0461218	12.7038	-0.849007	0.40748	0.709005	-5.77506
ENSRNOG00000005018	Scn2a	24766	0.00939095	13.6256	0.145612	0.885912	0.955585	-6.12023
ENSRNOG00000005021	Orc4	295596	0.0601104	11.3143	0.822687	0.421889	0.718454	-5.79635
ENSRNOG00000005024	Cdkn2aipnl	287278	0.0403869	9.80852	0.700111	0.493172	0.768148	-5.88728
ENSRNOG00000005031	Surf6	303076	0.0327701	11.5323	0.788109	0.441306	0.733483	-5.82338
ENSRNOG00000005033	Acvr1	79558	-0.208607	12.5537	-2.00651	0.0607041	0.286685	-4.31474
ENSRNOG00000005034	Arhgef25	314904	-0.0108045	13.9212	-0.136822	0.892752	0.958118	-6.12148
ENSRNOG00000005039	Tfpi	29436	0.0375256	11.8647	0.357086	0.725349	0.889715	-6.06685
ENSRNOG00000005041	Crip2	338401	0.0340256	13.5743	0.310812	0.75966	0.905701	-6.08234
ENSRNOG00000005046	Tspan13	366602	-0.0863248	13.7288	-1.14191	0.26906	0.582631	-5.49791
ENSRNOG00000005048	Trhr	25570	-0.698585	8.88718	-2.17382	0.0438861	0.2434	-4.03645
ENSRNOG00000005052	Slc39a9	314275	-0.251976	10.7291	-4.79392	0.000161625	0.0296144	1.05452
ENSRNOG00000005053	Egln3	54702	0.228065	9.40297	2.12014	0.0487496	0.254742	-4.12711
ENSRNOG00000005061	Dlst	299201	-0.0772171	13.7406	-0.745747	0.465839	0.749558	-5.85502
ENSRNOG00000005063	Atl1	362750	-0.230568	13.9896	-3.96385	0.000974377	0.0469079	-0.596565
ENSRNOG00000005064	Ube2b	81816	0.0871843	13.1136	1.94592	0.0681057	0.302368	-4.41224
ENSRNOG00000005067	Zfp36l2	298765	-0.237437	11.098	-2.27759	0.0357252	0.219725	-3.85773
ENSRNOG00000005074	Arl6ip6	499798	0.0753361	11.1569	0.925352	0.36752	0.676685	-5.70984
ENSRNOG00000005081	Fbxl20	64039	-0.0773047	11.3521	-1.13627	0.271348	0.584615	-5.50392
ENSRNOG00000005083	Rtfdc1	296410	-0.01837	12.7017	-0.422426	0.677921	0.868891	-6.0414
ENSRNOG00000005096	Bzw2	171439	-0.128125	12.0121	-1.15256	0.264777	0.577541	-5.48649
ENSRNOG00000005108	Wfs1	83725	0.00872925	13.7233	0.04627	0.963625	0.986709	-6.12984
ENSRNOG00000005109	Rprm	680110	-0.00871564	8.29214	-0.0203166	0.984023	0.993832	-6.13071
ENSRNOG00000005126	Pqlc3	298906	0.0762058	8.80687	0.373625	0.713226	0.884994	-6.0608
ENSRNOG00000005130	Ogdh	360975	0.0122697	13.7525	0.296042	0.770725	0.911417	-6.08683
ENSRNOG00000005132	Slc52a3	311536	-0.0273373	9.64058	-0.427353	0.674398	0.86725	-6.03931
ENSRNOG00000005133	Mapt	29477	-0.0118449	14.3069	-0.25433	0.802241	0.924481	-6.09836
ENSRNOG00000005138	Pip4k2c	140607	0.0317574	11.5452	0.448994	0.659013	0.861232	-6.02985
ENSRNOG00000005144	Tmem18	362722	0.063843	10.7086	0.792529	0.438793	0.731274	-5.81998
ENSRNOG00000005149	Sacm1l	116482	0.0901161	11.9923	1.13365	0.272418	0.58616	-5.5067
ENSRNOG00000005151	Dync2li1	298767	0.0685368	11.7381	0.866886	0.397876	0.702094	-5.76024
ENSRNOG00000005157	Rbbp7	83712	-0.0121658	14.075	-0.273536	0.787682	0.916527	-6.09327
ENSRNOG00000005167	LOC100912042	619345	0.218192	12.4598	3.50478	0.00265904	0.0700165	-1.51866
ENSRNOG00000005185	Nxph3	59315	-1.216	9.77499	-2.52285	0.021709	0.172155	-3.41926
ENSRNOG00000005191	Trim44	362172	-0.0760181	13.7043	-1.36696	0.189151	0.49562	-5.23813
ENSRNOG00000005195	Cst3	25307	0.0506744	15.443	0.766536	0.453698	0.741734	-5.8397
ENSRNOG00000005206	Kcnq3	29682	-0.310619	13.4358	-3.51624	0.00259331	0.0695391	-1.49572
ENSRNOG00000005209	Spred1	296072	0.115208	10.0218	1.40749	0.177008	0.48025	-5.18736
ENSRNOG00000005214	Plek	364206	0.104364	9.784	1.2794	0.21766	0.532002	-5.34375
ENSRNOG00000005223	Hnmt	81676	0.264262	10.9565	2.87449	0.0103855	0.122367	-2.75913
ENSRNOG00000005229	Sec16b	89868	0.142906	8.08129	1.2091	0.242902	0.556439	-5.42441
ENSRNOG00000005233	Lrrc6	299920	0.20335	9.6645	1.99405	0.0621638	0.28947	-4.33494
ENSRNOG00000005246	Tfap2c	362280	-0.374854	7.80794	-1.17988	0.254029	0.568889	-5.45681
ENSRNOG00000005247	LOC100912008	64463	0.152873	11.938	1.86942	0.0785999	0.323137	-4.53269
ENSRNOG00000005248	Slc1a4	305540	-0.145932	13.6994	-1.65529	0.115903	0.391076	-4.85259
ENSRNOG00000005250	Abcg5	114628	-0.153682	7.57266	-1.08083	0.29462	0.609896	-5.56161
ENSRNOG00000005256	Zc3h15	362154	0.147532	13.353	2.50094	0.0227111	0.176288	-3.45928
ENSRNOG00000005260	Acp1	24161	0.151194	11.9279	2.59889	0.0185474	0.15856	-3.27931
ENSRNOG00000005264	Sav1	299116	-0.0895359	10.5758	-1.08013	0.294924	0.610173	-5.56233
ENSRNOG00000005268	Gnat3	286924	-0.0635303	5.7289	-0.607135	0.551653	0.806297	-5.94704
ENSRNOG00000005270	Sycp3	25561	0.380693	8.53287	4.90587	0.000127359	0.0263911	1.27278
ENSRNOG00000005271	Rapgef5	362799	-0.283421	12.2847	-3.36593	0.00359942	0.0766161	-1.79586
ENSRNOG00000005274	Vrk1	362779	-0.0985141	10.226	-1.41178	0.175759	0.47818	-5.18191
ENSRNOG00000005275	Shmt1	287379	-0.0862114	9.04617	-0.633906	0.53444	0.794616	-5.93066
ENSRNOG00000005276	Csnk2a1	116549	-0.104642	13.7852	-1.0558	0.30559	0.62093	-5.58684
ENSRNOG00000005277	Ptprv	64576	0.231241	8.04492	1.63099	0.120974	0.39873	-4.88719
ENSRNOG00000005279	Ndufaf7	298748	-0.076026	11.8784	-1.21406	0.241048	0.555529	-5.41884
ENSRNOG00000005284	Itpka	81677	-0.182474	14.0383	-1.7557	0.0968406	0.357924	-4.70588
ENSRNOG00000005290	Ywhae	29753	0.0710448	15.3203	1.17365	0.25645	0.570342	-5.46363
ENSRNOG00000005291	Slc38a1	170567	0.268898	11.5931	2.3995	0.0279438	0.193015	-3.64241
ENSRNOG00000005298	Zfp513	313913	-0.0363254	11.9842	-0.537616	0.597695	0.830525	-5.98639
ENSRNOG00000005299	Kif5a	314906	-0.136179	14.1129	-1.55697	0.137594	0.423764	-4.99026
ENSRNOG00000005301	Eif2b4	117019	0.025086	12.708	0.527604	0.60448	0.833042	-5.99168
ENSRNOG00000005307	Slc4a10	295645	-0.232609	13.633	-2.87749	0.0103194	0.121889	-2.75336
ENSRNOG00000005308	Tmx2	295701	0.0812351	14.3677	1.97784	0.0641106	0.293904	-4.3611
ENSRNOG00000005309	Scn8a	29710	-0.332646	12.0954	-3.26872	0.00444654	0.0828072	-1.98894
ENSRNOG00000005326	Cnrip1	364208	-0.0475424	13.7413	-0.724573	0.478406	0.75934	-5.87023
ENSRNOG00000005330	Crebbp	54244	-0.846907	9.34051	-4.22858	0.000546975	0.0367167	-0.0653873
ENSRNOG00000005331	Vapb	60431	-0.108229	11.9949	-1.85108	0.0813181	0.328721	-4.5611
ENSRNOG00000005333	Azin1	58961	-0.150869	13.1542	-2.91493	0.00952817	0.118722	-2.68133
ENSRNOG00000005334	Acvr2a	29263	-0.261332	11.9162	-2.6652	0.0161525	0.14939	-3.1559
ENSRNOG00000005335	Galnt13	311039	0.22491	10.0558	1.20575	0.244157	0.557407	-5.42816
ENSRNOG00000005336	Prss27	287108	-0.150932	5.53918	-1.90872	0.0730421	0.312623	-4.4712
ENSRNOG00000005338	Drd5	25195	-0.856706	8.82181	-4.37614	0.000397035	0.0353695	0.229268
ENSRNOG00000005342	Rassf5	54355	-0.172339	10.5069	-0.56493	0.579379	0.820357	-5.97148
ENSRNOG00000005343	Esr2	25149	0.0741432	6.53612	0.700059	0.493204	0.768148	-5.88732
ENSRNOG00000005344	Nol10	313981	0.0737658	11.4436	1.15618	0.263334	0.576108	-5.48259
ENSRNOG00000005345	Vsnl1	24877	0.0262396	14.3655	0.331342	0.744369	0.899509	-6.07573
ENSRNOG00000005355	Ncstn	289231	-0.0329347	12.8876	-0.519831	0.609773	0.83585	-5.99572
ENSRNOG00000005358	Pmm1	300089	0.10779	13.8357	2.38724	0.0286479	0.19561	-3.66431
ENSRNOG00000005360	Dhrs7b	287380	0.0806552	11.5997	1.30538	0.208868	0.518932	-5.313
ENSRNOG00000005362	Rab3ip	29885	-0.108403	11.7737	-1.27646	0.218672	0.533091	-5.3472
ENSRNOG00000005365	Kcnip1	65023	0.654256	7.38859	2.85315	0.0108675	0.124903	-2.80004
ENSRNOG00000005368	Ppp3r2	29749	0.114518	5.43344	1.29341	0.212884	0.52543	-5.32724
ENSRNOG00000005369	Kcnj3	50599	-0.216853	11.4099	-2.61414	0.0179686	0.155282	-3.25104
ENSRNOG00000005374	Lyar	289707	-0.0373845	10.8507	-0.513628	0.614014	0.838609	-5.9989
ENSRNOG00000005378	Gna15	89788	0.0784334	10.2488	0.832654	0.416395	0.715535	-5.78836
ENSRNOG00000005379	Prp2	362450	-0.0452372	7.26517	-0.245978	0.808596	0.926832	-6.10046
ENSRNOG00000005386	Kitlg	60427	0.0535241	10.6187	0.400913	0.693396	0.875171	-6.05024
ENSRNOG00000005389	Ppp2ca	24672	0.0595143	14.6446	0.77024	0.451555	0.74083	-5.83692
ENSRNOG00000005390	Nup210	58958	-0.24963	9.97862	-3.41726	0.00321858	0.0741683	-1.69356
ENSRNOG00000005392	Ngfr	24596	-0.00579559	6.34958	-0.0277462	0.978182	0.991813	-6.13053
ENSRNOG00000005393	Sertad2	498423	0.0437693	11.4148	0.468712	0.645131	0.854438	-6.02084
ENSRNOG00000005397	Maea	298982	-0.0208124	12.7982	-0.36749	0.717713	0.88671	-6.06308
ENSRNOG00000005398	Olr810	405330	0.186204	4.71052	2.17574	0.0437207	0.242859	-4.03319
ENSRNOG00000005403	Olr811	405138	-0.182865	6.29138	-1.28701	0.215055	0.528501	-5.3348
ENSRNOG00000005404	Rasgrp1	29434	-0.269054	13.4079	-3.56762	0.00231795	0.0651761	-1.3928
ENSRNOG00000005406	Clint1	360515	-0.150297	13.1816	-2.88297	0.0101997	0.120775	-2.74284
ENSRNOG00000005407	Olr812	405137	0.282127	6.04169	3.27511	0.0043853	0.0828072	-1.97628
ENSRNOG00000005410	Cdca7l	619566	0.0594499	7.36014	0.324082	0.749764	0.902465	-6.07811
ENSRNOG00000005412	Olr813	405136	0.239017	5.21357	1.6256	0.122125	0.400179	-4.89481
ENSRNOG00000005413	Creb3l1	362165	-0.137257	11.7306	-0.66935	0.512113	0.778666	-5.90794
ENSRNOG00000005418	Trap1	287069	-0.088071	13.0819	-1.89025	0.075608	0.318126	-4.50019
ENSRNOG00000005420	Abcg8	155192	0.0670095	5.91415	0.536758	0.598275	0.830525	-5.98685
ENSRNOG00000005424	Odc1	24609	-0.0544271	11.7872	-0.687294	0.501014	0.771819	-5.896
ENSRNOG00000005426	Snupn	316108	-0.163837	11.1593	-2.76301	0.0131524	0.135824	-2.97177
ENSRNOG00000005428	Ctbp1	29382	-0.0360003	13.8821	-0.799998	0.434567	0.729375	-5.8142
ENSRNOG00000005431	Olr816	405134	0.0672623	4.4191	0.870253	0.396085	0.70033	-5.75742
ENSRNOG00000005434	Sptbn1	305614	0.0134074	14.7571	0.242362	0.811352	0.928006	-6.10135
ENSRNOG00000005437	Rida	65151	0.224595	12.4439	3.67834	0.0018195	0.0610686	-1.1706
ENSRNOG00000005438	Pcsk2	25121	-0.155214	13.8895	-2.99525	0.0080242	0.109798	-2.52589
ENSRNOG00000005446	Gna11	81662	-0.481009	11.901	-3.48038	0.00280455	0.0716701	-1.56748
ENSRNOG00000005457	Lamp5	362220	-0.0113413	11.6996	-0.0724545	0.943072	0.978678	-6.12827
ENSRNOG00000005465	Kcnmb1	29747	-0.342517	7.78625	-2.14087	0.0468155	0.24918	-4.09224
ENSRNOG00000005469	Olr819	405132	0.256826	6.95403	2.03636	0.0573304	0.279669	-4.26604
ENSRNOG00000005470	Atxn3	60331	-0.321415	9.52634	-3.27335	0.00440208	0.0828072	-1.97977
ENSRNOG00000005472	Sp4	25162	-0.0679703	11.6277	-1.11696	0.279292	0.593349	-5.52429
ENSRNOG00000005478	Fkbp9	297123	-0.0692688	13.2978	-0.459322	0.651726	0.857584	-6.02518
ENSRNOG00000005480	Ybx3	83807	0.236901	13.0417	2.49976	0.0227659	0.17657	-3.46141
ENSRNOG00000005483	Rpap1	311338	-0.107636	10.5789	-1.42862	0.170931	0.472265	-5.16042
ENSRNOG00000005492	Hpcal1	50871	0.0119139	13.7554	0.0588972	0.953709	0.982188	-6.12917
ENSRNOG00000005496	Ing3	312154	0.110604	12.5693	2.01978	0.0591827	0.282914	-4.29314
ENSRNOG00000005498	Gcg	24952	-0.07638	5.82796	-0.691195	0.49862	0.769977	-5.89336
ENSRNOG00000005524	Pno1	289809	0.0585224	11.4151	1.45252	0.164265	0.463246	-5.12958
ENSRNOG00000005539	Thg1l	303067	-0.105428	9.87731	-1.08564	0.292545	0.607195	-5.55671
ENSRNOG00000005542	Apob	54225	0.0208205	4.72292	0.1484	0.883744	0.955134	-6.11982
ENSRNOG00000005551	Derl1	362912	-0.032648	12.7972	-0.582195	0.567951	0.814359	-5.96168
ENSRNOG00000005561	Brinp1	140610	-0.00529457	13.9959	-0.088762	0.930291	0.973812	-6.12695
ENSRNOG00000005565	Traf3ip3	360900	0.110294	7.82957	1.27222	0.220141	0.534757	-5.35217
ENSRNOG00000005575	Abi3	303476	-0.125443	7.64199	-0.885185	0.388203	0.694249	-5.74479
ENSRNOG00000005577	Desi1	315160	-0.0118953	14.1969	-0.188551	0.85264	0.94501	-6.11301
ENSRNOG00000005578	Zbtb44	363035	-0.238359	8.97135	-2.03404	0.057586	0.280033	-4.26983
ENSRNOG00000005580	Itgb4	25724	-0.263514	10.3862	-1.46261	0.161517	0.459713	-5.11645
ENSRNOG00000005587	Suclg1	114597	-0.00495978	14.125	-0.0766505	0.939782	0.977461	-6.12796
ENSRNOG00000005592	Brinp2	286895	-0.0710725	13.009	-0.732374	0.473753	0.756296	-5.86467
ENSRNOG00000005600	Nr4a2	54278	-0.260352	11.6633	-1.54089	0.141447	0.430607	-5.01217
ENSRNOG00000005602	Mthfd1	64300	0.0645522	12.2637	1.06486	0.301585	0.617951	-5.57777
ENSRNOG00000005609	Neurod1	29458	-0.224412	11.9136	-1.39913	0.179458	0.483628	-5.19792
ENSRNOG00000005610	Yipf4	362699	0.0129188	13.0364	0.202582	0.841827	0.940298	-6.11025
ENSRNOG00000005614	Txn2	79462	0.0678291	12.885	1.23725	0.232538	0.546833	-5.39257
ENSRNOG00000005615	Gadd45a	25112	0.172747	11.7633	1.17185	0.257154	0.571039	-5.4656
ENSRNOG00000005618	Fmc1	500087	0.244708	10.8845	3.26141	0.00451767	0.0828072	-2.00342
ENSRNOG00000005620	Lcp2	155918	-0.153732	8.49793	-1.52037	0.146497	0.438682	-5.03991
ENSRNOG00000005639	Ar	24208	0.144306	10.4153	0.795482	0.437119	0.730614	-5.8177
ENSRNOG00000005646	Tas2r107	78981	0.0155734	5.07098	0.145516	0.885987	0.955585	-6.12025
ENSRNOG00000005650	Pgf	94203	0.260444	7.54543	0.795953	0.436853	0.730441	-5.81734
ENSRNOG00000005652	Cntn4	116658	-0.168056	11.4789	-1.22161	0.238251	0.5535	-5.41033
ENSRNOG00000005659	Aurkb	114592	1.01201	11.0091	2.0226	0.0588637	0.281954	-4.28854
ENSRNOG00000005660	Fam110c	500638	-0.0579365	4.96366	-0.399716	0.69426	0.875356	-6.05072
ENSRNOG00000005662	Grm7	81672	-0.202421	13.1818	-3.09765	0.00643841	0.100116	-2.32608
ENSRNOG00000005664	Tas2r105	78985	-0.0252065	5.26341	-0.277179	0.78493	0.915908	-6.09226
ENSRNOG00000005668	Ndufa8	296658	-0.0184628	12.2606	-0.287001	0.777523	0.913266	-6.08948
ENSRNOG00000005669	Car8	297814	0.411368	10.9171	4.31189	0.000456402	0.0359539	0.101124
ENSRNOG00000005679	Fap	192203	-0.103036	7.01903	-0.219744	0.828644	0.935089	-6.1066
ENSRNOG00000005687	Slc6a14	298340	0.170628	4.45434	1.64123	0.118814	0.394957	-4.87265
ENSRNOG00000005690	Lmcd1	494021	0.00642665	11.1036	0.0929411	0.927019	0.971881	-6.12657
ENSRNOG00000005691	Rnf32	311936	-0.229266	9.6421	-2.10352	0.0503523	0.259475	-4.15492
ENSRNOG00000005692	Tas2r114	78982	-0.0570291	4.32144	-0.902762	0.379058	0.686727	-5.72967
ENSRNOG00000005695	Mgp	25333	0.0777341	12.1141	0.282467	0.78094	0.914756	-6.09077
ENSRNOG00000005697	Slc6a11	79213	0.0851434	13.6006	0.753782	0.461124	0.746011	-5.84915
ENSRNOG00000005698	Ndufa5	25488	0.0290602	13.2655	0.515314	0.61286	0.837651	-5.99804
ENSRNOG00000005700	Nsg1	25247	0.0618811	14.8795	0.969886	0.345477	0.658273	-5.66947
ENSRNOG00000005708	Mmp16	65205	-0.178929	11.8123	-2.73512	0.0139486	0.139131	-3.02452
ENSRNOG00000005713	Ccdc82	300359	-0.133107	10.7734	-1.92718	0.0705541	0.307649	-4.44204
ENSRNOG00000005715	Lgr4	286994	0.0557217	12.1168	0.798567	0.435375	0.72999	-5.81532
ENSRNOG00000005717	Tas2r121	78983	0.038057	4.88685	0.441056	0.664638	0.863948	-6.03337
ENSRNOG00000005726	Pclo	56768	-0.162493	12.4401	-1.66943	0.113038	0.387442	-4.8323
ENSRNOG00000005727	Galnt3	366061	-0.307723	7.99824	-1.35001	0.194422	0.501687	-5.25901
ENSRNOG00000005731	Birc3	78971	-0.0982083	7.66397	-0.383477	0.706041	0.881349	-6.05707
ENSRNOG00000005732	Tas2r13	78984	-0.145403	4.88295	-1.44021	0.167672	0.467173	-5.14552
ENSRNOG00000005742	Olr584	404861	-0.285236	5.20793	-1.78992	0.0909962	0.34612	-4.65452
ENSRNOG00000005753	Alg13	300284	-0.0122773	9.25916	-0.14816	0.88393	0.955134	-6.11986
ENSRNOG00000005763	Arl1	64187	-0.00372532	13.4659	-0.0742264	0.941682	0.977888	-6.12814
ENSRNOG00000005766	Tbc1d20	362237	-0.332893	10.6702	-3.48105	0.00280044	0.0716701	-1.56613
ENSRNOG00000005770	Sostdc1	266803	0.507121	10.5394	0.616823	0.545389	0.801739	-5.94119
ENSRNOG00000005793	Olr588	295822	0.158316	4.84262	0.877165	0.392423	0.696829	-5.7516
ENSRNOG00000005794	Slc10a1	24777	-0.097808	5.14928	-1.01062	0.326135	0.641237	-5.63107
ENSRNOG00000005796	Ctnna1	307505	0.124789	13.2808	1.922	0.0712439	0.308891	-4.45023
ENSRNOG00000005798	Cav3	29161	-0.292789	8.57238	-0.774978	0.448823	0.739275	-5.83336
ENSRNOG00000005801	Stx17	252853	-0.120469	9.02091	-0.888808	0.386306	0.692285	-5.74169
ENSRNOG00000005804	Eif3d	362952	-0.0487447	12.945	-0.930128	0.365111	0.67502	-5.7056
ENSRNOG00000005806	Oxtr	25342	-0.410899	7.29649	-1.74443	0.0988353	0.361789	-4.72265
ENSRNOG00000005807	Ptpn7	246781	-0.00376051	7.26425	-0.0299207	0.976473	0.991739	-6.13047
ENSRNOG00000005809	Arhgdib	362456	0.0627351	11.0006	1.28851	0.214545	0.528025	-5.33303
ENSRNOG00000005825	Lyz2	25211	0.1879	11.2614	1.16442	0.260069	0.573308	-5.47368
ENSRNOG00000005828	Skp1	287280	0.0815809	14.2543	1.88277	0.0766709	0.321101	-4.51189
ENSRNOG00000005841	Erp44	298066	-0.191771	11.2033	-2.9628	0.00860179	0.113093	-2.58883
ENSRNOG00000005849	Aco1	50655	-0.00310171	12.6397	-0.0636855	0.949951	0.981246	-6.12888
ENSRNOG00000005853	Tacr1	24807	-0.564275	8.95565	-3.29767	0.00417554	0.0820242	-1.93153
ENSRNOG00000005854	Angpt1	89807	-0.0409206	9.87286	-0.256055	0.80093	0.924118	-6.09792
ENSRNOG00000005858	Kap	24937	0.0484218	5.09499	0.284566	0.779357	0.914389	-6.09018
ENSRNOG00000005861	Hsd11b1	25116	0.0695281	13.477	0.799488	0.434855	0.729375	-5.8146
ENSRNOG00000005863	Olr601	311175	0.00948194	4.50944	0.0649685	0.948944	0.980736	-6.12879
ENSRNOG00000005871	Il1rn	60582	-0.270937	6.32439	-2.89017	0.0100445	0.120131	-2.729
ENSRNOG00000005874	Tle2	299636	-0.0425958	8.89674	-0.244455	0.809756	0.927422	-6.10083
ENSRNOG00000005877	Lrpprc	313867	-0.0757642	13.1682	-1.16979	0.257961	0.572002	-5.46784
ENSRNOG00000005880	Olr604	404855	-0.105863	4.54631	-1.08565	0.292539	0.607195	-5.55669
ENSRNOG00000005888	Fsip1	296074	0.0929057	7.22516	0.442232	0.663804	0.86357	-6.03285
ENSRNOG00000005890	Serbp1	246303	0.116564	14.4263	2.12107	0.0486617	0.254742	-4.12556
ENSRNOG00000005903	St14	114093	0.323511	9.52974	1.9632	0.0659163	0.297027	-4.38462
ENSRNOG00000005904	Cdc27	360643	-0.209477	10.0577	-3.36611	0.00359801	0.0766161	-1.7955
ENSRNOG00000005905	Pde4b	24626	0.0645523	13.1811	1.17217	0.25703	0.571039	-5.46525
ENSRNOG00000005907	Rad18	362412	0.0202047	10.4602	0.225235	0.824437	0.933872	-6.10537
ENSRNOG00000005908	Dmtf1	114485	-0.141405	12.229	-1.69378	0.108246	0.378198	-4.79707
ENSRNOG00000005911	Rln3	266997	-0.315885	5.60425	-1.51287	0.148377	0.441703	-5.04997
ENSRNOG00000005916	Ppm1a	24666	0.0919999	13.3716	1.84458	0.0823028	0.330936	-4.57113
ENSRNOG00000005917	Pawr	64513	0.0496469	9.32379	0.3388	0.738841	0.896808	-6.07322
ENSRNOG00000005921	Olr606	405246	0.0139987	5.57869	0.0814606	0.936011	0.976152	-6.12757
ENSRNOG00000005924	Dstn	296197	0.155148	13.6163	2.97126	0.00844735	0.112254	-2.57243
ENSRNOG00000005929	Them6	300015	-0.212492	8.88805	-1.49904	0.1519	0.446335	-5.06843
ENSRNOG00000005931	Cpq	58952	0.274045	12.8258	4.77661	0.00016771	0.0296144	1.02064
ENSRNOG00000005933	Yap1	363014	-0.102306	8.79281	-0.425464	0.675748	0.867856	-6.04011
ENSRNOG00000005935	A3galt2	171553	-0.345621	7.46078	-2.00754	0.0605841	0.28631	-4.31306
ENSRNOG00000005936	Foxm1	58921	-0.111939	8.32771	-1.08675	0.292067	0.607085	-5.55557
ENSRNOG00000005947	Pde6h	114248	0.375662	8.01584	1.36244	0.190547	0.496526	-5.24373
ENSRNOG00000005950	Olr608	404853	0.128189	5.22895	1.31012	0.207297	0.516906	-5.30735
ENSRNOG00000005954	Il5ra	114103	0.158565	4.59	1.27922	0.217724	0.532002	-5.34397
ENSRNOG00000005957	Slc4a7	117955	-0.127292	10.6998	-0.919845	0.37031	0.67933	-5.71472
ENSRNOG00000005963	Rab2a	65158	0.0091545	14.1639	0.20982	0.836261	0.938005	-6.10874
ENSRNOG00000005964	Nr4a3	58853	0.0534476	9.51777	0.197347	0.845858	0.942308	-6.1113
ENSRNOG00000005970	Lrrc1	367113	0.0482133	9.76711	0.340228	0.737784	0.896272	-6.07274
ENSRNOG00000005975	Rpl30	64640	0.00637794	14.2922	0.158855	0.875624	0.952173	-6.1182
ENSRNOG00000005984	Etv6	312777	-0.0906947	8.87746	-0.47701	0.639329	0.852361	-6.01693
ENSRNOG00000005985	Kcnma1	83731	-0.1468	13.1311	-2.34276	0.0313443	0.206323	-3.74331
ENSRNOG00000005987	Suox	81805	0.0793355	12.8475	1.2903	0.213937	0.527074	-5.33092
ENSRNOG00000005990	Wdsub1	362137	0.0434347	10.2065	0.635907	0.533165	0.793216	-5.92941
ENSRNOG00000005997	Olr1308	405079	0.215974	4.86628	2.20288	0.0414429	0.236264	-3.98685
ENSRNOG00000005998	Smoc1	314280	-0.102437	10.8764	-1.02292	0.320445	0.635689	-5.61919
ENSRNOG00000006000	Cdk12	192350	0.00110971	10.6563	0.0148868	0.988293	0.995553	-6.13081
ENSRNOG00000006010	Slc6a20	113918	0.146311	11.9084	0.435588	0.668525	0.864984	-6.03576
ENSRNOG00000006019	G0s2	289388	0.316437	10.6803	2.95226	0.00879794	0.114098	-2.60924
ENSRNOG00000006024	Olr630	405947	-0.0388143	5.72216	-0.314257	0.757087	0.904556	-6.08126
ENSRNOG00000006030	Ptprz1	25613	0.0385535	13.465	0.520213	0.609513	0.835833	-5.99552
ENSRNOG00000006033	Spon2	171569	-0.067337	8.12349	-0.398114	0.695419	0.875676	-6.05136
ENSRNOG00000006035	LOC103693060	300615	-0.486712	4.76647	-2.98354	0.00822809	0.111033	-2.54862
ENSRNOG00000006052	Sulf2	311642	0.0130099	13.6705	0.11278	0.911504	0.96503	-6.12451
ENSRNOG00000006067	Aifm1	83533	0.0155414	12.1394	0.184375	0.855865	0.945789	-6.11379
ENSRNOG00000006069	Eif2ak3	29702	0.0814058	11.4125	1.33021	0.200731	0.508264	-5.28315
ENSRNOG00000006075	Fez1	81730	-0.00597259	13.5596	-0.148712	0.883501	0.955134	-6.11977
ENSRNOG00000006082	Rmdn2	313840	0.1562	10.5698	1.79139	0.0907534	0.345871	-4.65231
ENSRNOG00000006090	Ucn	29151	0.0857015	7.5243	0.766903	0.453485	0.741699	-5.83942
ENSRNOG00000006094	Cd44	25406	-0.127009	6.05451	-1.89657	0.0747215	0.316438	-4.4903
ENSRNOG00000006104	Tg	24826	0.221617	5.46631	1.97215	0.0648077	0.294365	-4.37026
ENSRNOG00000006116	Hk2	25059	-0.503977	9.28602	-3.37166	0.00355474	0.0765268	-1.78444
ENSRNOG00000006118	Klf10	81813	-0.152874	11.1089	-1.16124	0.261327	0.575016	-5.47713
ENSRNOG00000006120	Shh	29499	-0.061907	5.46936	-0.356585	0.725717	0.889715	-6.06703
ENSRNOG00000006122	Igf2bp1	303477	0.331473	6.69754	1.91538	0.0721347	0.311152	-4.46069
ENSRNOG00000006126	Nup88	113929	0.0820071	12.1378	1.47766	0.157484	0.452695	-5.09672
ENSRNOG00000006130	Rab5b	288779	-0.2251	12.6672	-2.99096	0.00809823	0.109961	-2.53421
ENSRNOG00000006132	Fam71f1	500061	-0.0163984	6.20038	-0.0820323	0.935563	0.976008	-6.12753
ENSRNOG00000006136	Pdpk1	81745	-0.0649616	13.0865	-1.20686	0.243741	0.557089	-5.42691
ENSRNOG00000006139	Stx18	360953	-0.148874	13.236	-2.01085	0.0602023	0.28568	-4.30768
ENSRNOG00000006143	Ngly1	361014	0.0218918	11.477	0.394534	0.698011	0.876694	-6.05277
ENSRNOG00000006144	Cntn3	54279	-0.0884008	10.7079	-0.566354	0.578432	0.819502	-5.97068
ENSRNOG00000006146	Trim54	362708	-0.20087	6.17375	-0.657489	0.519525	0.783774	-5.91568
ENSRNOG00000006151	Reg3b	24618	-0.0724523	5.50541	-0.60254	0.554636	0.807391	-5.94978
ENSRNOG00000006174	Grid2	79220	0.222751	10.9245	2.20526	0.0412485	0.235437	-3.98277
ENSRNOG00000006178	Dync1h1	29489	-0.171716	14.0492	-2.14574	0.0463715	0.248762	-4.08403
ENSRNOG00000006197	Calu	64366	-0.00886302	12.141	-0.132106	0.896426	0.959776	-6.12212
ENSRNOG00000006199	Ispd	493574	-0.118647	9.75496	-0.851217	0.406285	0.708166	-5.77324
ENSRNOG00000006200	St18	266680	-0.21396	11.4625	-1.02365	0.320111	0.635486	-5.61848
ENSRNOG00000006204	Slc30a3	366568	-0.429563	12.9204	-4.08896	0.00074144	0.0420734	-0.345236
ENSRNOG00000006206	Tmem106b	312132	0.0314742	13.4074	0.71326	0.485202	0.76357	-5.87818
ENSRNOG00000006221	Uba3	117553	-0.0959896	12.915	-1.66352	0.114228	0.388992	-4.8408
ENSRNOG00000006226	Cacng2	84347	0.0456599	14.1758	0.831792	0.416868	0.715676	-5.78905
ENSRNOG00000006228	Pdia4	116598	0.0239165	11.6656	0.301887	0.766339	0.909545	-6.08508
ENSRNOG00000006231	Ptpro	50677	-0.104791	12.2569	-1.02615	0.318964	0.634094	-5.61605
ENSRNOG00000006235	Nell2	81734	-0.32498	13.7922	-3.23376	0.00479697	0.0846754	-2.05814
ENSRNOG00000006236	Dsn1	499933	0.0645017	6.38305	0.357466	0.725069	0.889607	-6.06671
ENSRNOG00000006241	2019-03-07	311059	-0.0869285	11.101	-1.1578	0.262689	0.575701	-5.48084
ENSRNOG00000006244	Lztfl1	316102	0.0672871	10.1898	0.559933	0.582708	0.822683	-5.97426
ENSRNOG00000006268	Ifnb1	24481	0.119174	5.15844	1.20773	0.243416	0.556933	-5.42595
ENSRNOG00000006280	Pcsk9	298296	0.0471314	7.21985	0.316048	0.75575	0.90393	-6.08069
ENSRNOG00000006302	Gclc	25283	-0.0127232	12.6417	-0.282408	0.780984	0.914756	-6.09079
ENSRNOG00000006305	Slc38a2	29642	0.0334703	13.5037	0.396878	0.696314	0.876004	-6.05185
ENSRNOG00000006306	Gip	25040	0.177412	6.70399	0.809987	0.428956	0.724838	-5.8064
ENSRNOG00000006311	Ccr9	282832	0.117943	5.19432	1.13901	0.270237	0.583049	-5.50101
ENSRNOG00000006320	Ptges	59103	-0.0914245	7.98643	-0.591979	0.561527	0.810775	-5.95601
ENSRNOG00000006324	Trpc6	89823	0.0227312	10.7542	0.22387	0.825483	0.934136	-6.10568
ENSRNOG00000006328	Wwp1	297930	0.165525	12.2674	3.06873	0.0068523	0.10286	-2.38268
ENSRNOG00000006330	Elf3	304815	-0.0247324	7.2571	-0.110193	0.913525	0.965212	-6.1248
ENSRNOG00000006331	Elovl5	171400	0.124721	13.802	2.43992	0.025736	0.184974	-3.56986
ENSRNOG00000006340	Memo1	298787	0.0760367	11.7781	1.24232	0.230706	0.54541	-5.38677
ENSRNOG00000006353	Large2	311202	0.277635	7.78296	0.835726	0.41471	0.714702	-5.78587
ENSRNOG00000006355	Akap8l	299569	-0.00451401	13.1589	-0.0921026	0.927675	0.972138	-6.12664
ENSRNOG00000006359	Galk1	287835	-0.0646771	10.6174	-0.879167	0.391367	0.69612	-5.7499
ENSRNOG00000006360	Reg3a	171162	-0.0530691	5.32744	-0.389776	0.701462	0.877919	-6.05464
ENSRNOG00000006364	Dld	298942	0.0350702	12.8662	0.470209	0.644083	0.854431	-6.02014
ENSRNOG00000006368	Lrrn3	81514	-0.118073	12.8199	-2.19055	0.0424631	0.238796	-4.00792
ENSRNOG00000006370	RGD1310852	314992	-0.204709	7.94071	-1.262	0.223711	0.538079	-5.36407
ENSRNOG00000006375	Vdac1	83529	-0.0398534	14.6003	-0.744425	0.466618	0.750305	-5.85598
ENSRNOG00000006380	Srsf6	362264	0.152136	13.7444	3.39241	0.00339767	0.0751413	-1.74311
ENSRNOG00000006388	Pygl	64035	0.412885	10.1483	2.05019	0.0558257	0.274478	-4.24333
ENSRNOG00000006392	Xrcc6	25019	0.118378	11.7862	2.38179	0.0289662	0.196941	-3.67403
ENSRNOG00000006393	Sirt6	299638	0.0020482	10.8254	0.0410805	0.967702	0.989272	-6.13007
ENSRNOG00000006394	Tbc1d10a	360968	0.0249059	12.2233	0.411309	0.6859	0.872683	-6.04602
ENSRNOG00000006397	Chrm5	53949	-0.600627	9.2926	-2.21173	0.0407234	0.234123	-3.97166
ENSRNOG00000006399	Synj2bp	64531	0.0912897	12.3581	1.96373	0.065851	0.296966	-4.38378
ENSRNOG00000006400	Tbc1d14	360956	-0.050103	13.4104	-0.809161	0.429419	0.725249	-5.80705
ENSRNOG00000006408	Olr693	404821	-0.218417	6.68322	-1.36697	0.189147	0.49562	-5.23812
ENSRNOG00000006410	Akap5	171026	-0.11821	11.2226	-0.880444	0.390694	0.695962	-5.74882
ENSRNOG00000006412	Zhx1	171159	-0.0841761	12.7215	-1.39836	0.179687	0.483971	-5.1989
ENSRNOG00000006415	Olr694	295896	-0.232626	4.9486	-2.53461	0.0211889	0.170874	-3.39774
ENSRNOG00000006426	Syt1	25716	-0.1419	14.8277	-2.95134	0.00881519	0.114166	-2.61101
ENSRNOG00000006428	Olr1121	315452	0.0629116	5.09112	0.316764	0.755216	0.90393	-6.08046
ENSRNOG00000006432	Trnt1	312616	0.107028	11.1863	1.80991	0.087727	0.341146	-4.62421
ENSRNOG00000006433	Olr696	405951	-0.0803307	4.74108	-0.794034	0.43794	0.731135	-5.81882
ENSRNOG00000006435	Tor1b	311854	-0.00230045	9.99478	-0.0434509	0.96584	0.988022	-6.12997
ENSRNOG00000006439	Olr1122	405181	0.120542	4.47022	1.18545	0.25188	0.567214	-5.45069
ENSRNOG00000006441	Zbtb25	314245	0.107519	8.59738	1.30395	0.209347	0.51912	-5.31472
ENSRNOG00000006445	Olr698	311179	-0.0392218	5.54301	-0.187103	0.853758	0.945073	-6.11328
ENSRNOG00000006450	Erbb2	24337	-0.00434536	9.07976	-0.0306555	0.975895	0.991739	-6.13045
ENSRNOG00000006460	Amdhd2	302972	-0.036311	8.95377	-0.390184	0.701166	0.877677	-6.05448
ENSRNOG00000006462	Ero1a	171562	-0.0757794	12.4781	-1.37339	0.18718	0.494239	-5.23015
ENSRNOG00000006467	Eif2b2	84005	0.0868516	12.9759	1.49955	0.151771	0.446335	-5.06776
ENSRNOG00000006469	Cdk2	362817	0.0673264	10.5774	0.924758	0.36782	0.676728	-5.71037
ENSRNOG00000006470	Camk1g	171358	0.0803587	11.2843	0.44704	0.660396	0.862432	-6.03072
ENSRNOG00000006471	Pvalb	25269	0.0734361	12.5497	1.09239	0.289652	0.604175	-5.54979
ENSRNOG00000006472	Hspa2	60460	-0.00863043	13.3758	-0.112052	0.912073	0.965212	-6.12459
ENSRNOG00000006486	Reg1a	24714	0.108186	5.20751	1.23433	0.233596	0.548162	-5.3959
ENSRNOG00000006499	Cops5	312916	0.0343709	12.8503	0.543003	0.59406	0.828607	-5.98351
ENSRNOG00000006500	Snf8	287645	0.115951	13.9057	2.45236	0.0250899	0.183699	-3.54741
ENSRNOG00000006508	Thnsl2	297332	-0.0294863	10.591	-0.295606	0.771052	0.911417	-6.08696
ENSRNOG00000006513	Borcs6	497934	-0.0912548	9.80044	-1.06597	0.301097	0.617615	-5.57665
ENSRNOG00000006514	Vezt	299738	0.0373786	12.2319	0.733021	0.473368	0.756057	-5.86421
ENSRNOG00000006527	Slc6a1	79212	-0.172756	13.5969	-1.2638	0.223076	0.537662	-5.36197
ENSRNOG00000006532	H3f3b	117056	-0.00175927	14.5227	-0.0294147	0.976871	0.991739	-6.13048
ENSRNOG00000006534	Crbn	297498	-0.0567845	13.1276	-1.06344	0.302209	0.618632	-5.57919
ENSRNOG00000006539	Pex16	311203	-0.0796529	12.9032	-1.93779	0.0691586	0.304349	-4.42519
ENSRNOG00000006541	Nup107	116555	0.0612687	11.8804	1.25219	0.227174	0.541139	-5.37541
ENSRNOG00000006542	Atp6v0c	170667	-0.0582619	15.0934	-0.842616	0.410949	0.711566	-5.78028
ENSRNOG00000006543	Bsnd	192675	0.0345642	4.60369	0.414178	0.683837	0.871435	-6.04484
ENSRNOG00000006545	2019-09-07	64551	0.0963668	13.9958	1.62531	0.122187	0.400179	-4.89522
ENSRNOG00000006548	Mrc2	498011	-0.460933	8.50664	-3.05438	0.00706722	0.104119	-2.41072
ENSRNOG00000006554	Fam149b1	289900	0.0197018	12.7015	0.316112	0.755702	0.90393	-6.08067
ENSRNOG00000006577	Olr1147	300408	0.10571	4.51057	1.05206	0.307257	0.622085	-5.59057
ENSRNOG00000006578	Odf1	24610	-0.207764	6.06247	-1.39013	0.18213	0.487385	-5.20925
ENSRNOG00000006579	Reg3g	24620	0.317973	6.24886	2.0713	0.0535979	0.269317	-4.2085
ENSRNOG00000006582	Aptx	259271	-0.0543313	11.0633	-1.0808	0.294632	0.609896	-5.56164
ENSRNOG00000006583	Hpgds	58962	-0.21239	7.36127	-1.35524	0.192783	0.500029	-5.25259
ENSRNOG00000006584	Olr1148	405173	0.0315134	4.4149	0.567125	0.57792	0.819221	-5.97025
ENSRNOG00000006588	Meox2	29279	-0.155811	8.06049	-0.723254	0.479196	0.759781	-5.87116
ENSRNOG00000006589	Mif	81683	-0.0776953	13.2832	-1.19286	0.249037	0.563719	-5.44249
ENSRNOG00000006593	Grpel1	79563	0.159385	12.8466	2.56389	0.0199441	0.165311	-3.34394
ENSRNOG00000006595	Htr3a	79246	-0.190544	10.1201	-0.82973	0.418002	0.71602	-5.79071
ENSRNOG00000006604	Thy1	24832	-0.0609083	15.3042	-1.04951	0.308392	0.622924	-5.59309
ENSRNOG00000006611	Nostrin	311111	0.0959218	10.5449	1.19589	0.247886	0.562182	-5.43914
ENSRNOG00000006615	Mtap	298227	0.205061	8.33828	2.42645	0.026453	0.187612	-3.59411
ENSRNOG00000006622	Cry1	299691	0.223963	11.1829	2.788	0.0124763	0.132462	-2.92434
ENSRNOG00000006623	Cd302	295629	0.305491	11.7701	2.83599	0.0112706	0.126688	-2.83287
ENSRNOG00000006637	Olr720	405955	-0.18509	4.74397	-0.992032	0.334864	0.649426	-5.64876
ENSRNOG00000006639	Scn9a	78956	0.469368	7.38274	2.54727	0.0206419	0.168866	-3.37451
ENSRNOG00000006641	Dbh	25699	-0.414349	6.40905	-2.58994	0.0188954	0.159815	-3.29587
ENSRNOG00000006642	Yipf6	363476	-0.208794	12.7813	-1.98764	0.0629274	0.290694	-4.3453
ENSRNOG00000006649	Thrb	24831	-0.605448	10.5698	-2.87627	0.0103461	0.122053	-2.75569
ENSRNOG00000006652	Ddx1	84474	-0.0106117	14.1055	-0.222011	0.826907	0.934338	-6.1061
ENSRNOG00000006653	Slc38a4	170573	-1.03744	9.45012	-2.53137	0.0213309	0.17115	-3.40367
ENSRNOG00000006654	Olr721	295914	0.0229279	4.45441	0.170674	0.866462	0.949776	-6.11624
ENSRNOG00000006655	Plrg1	60376	0.0672914	12.8832	1.65954	0.115035	0.389665	-4.84651
ENSRNOG00000006663	Usp2	115771	0.0437657	11.6761	0.485868	0.633162	0.849249	-6.01269
ENSRNOG00000006669	Olr722	366114	0.050324	4.34619	0.579179	0.569939	0.815959	-5.96341
ENSRNOG00000006674	Rflnb	287534	0.138401	9.18798	0.796572	0.436502	0.730441	-5.81686
ENSRNOG00000006675	Fabp1	24360	0.0690271	5.05877	0.349257	0.731114	0.89323	-6.06962
ENSRNOG00000006681	Rdh10	353252	0.0437118	11.8281	0.843712	0.410353	0.71092	-5.77939
ENSRNOG00000006695	Rbck1	60383	-0.00860577	11.0289	-0.142797	0.888101	0.956757	-6.12064
ENSRNOG00000006697	Pip4p2	362490	-0.117516	13.1623	-1.7207	0.103151	0.369624	-4.75769
ENSRNOG00000006700	Wdyhv1	362914	0.152788	11.659	2.12206	0.0485676	0.254506	-4.12389
ENSRNOG00000006705	Mkks	311456	-0.126374	10.1491	-1.15859	0.262379	0.575538	-5.48
ENSRNOG00000006706	Olr724	366115	-0.250011	5.51465	-1.8807	0.0769669	0.321427	-4.51512
ENSRNOG00000006709	Pzp	252922	-0.0104091	5.65205	-0.10559	0.917123	0.967251	-6.1253
ENSRNOG00000006715	Ccr1	57301	-0.0193805	5.87589	-0.093631	0.926479	0.971636	-6.1265
ENSRNOG00000006716	Olr725	311180	0.0528493	5.4544	0.280095	0.782729	0.915241	-6.09144
ENSRNOG00000006720	Rnpep	81761	-0.123984	13.0382	-2.61337	0.0179975	0.155302	-3.25248
ENSRNOG00000006731	Spc25	295661	-0.235916	9.57007	-0.851456	0.406156	0.708166	-5.77304
ENSRNOG00000006734	Olr1606	305711	-0.0461942	5.40725	-0.513214	0.614298	0.838609	-5.99911
ENSRNOG00000006735	Cdkn2b	25164	0.613918	6.57614	3.05985	0.00698451	0.103383	-2.40003
ENSRNOG00000006736	Ccr3	117027	-0.0919303	7.20706	-1.25522	0.2261	0.540283	-5.37192
ENSRNOG00000006738	Fbxo32	171043	0.546669	9.70249	3.00446	0.00786713	0.109314	-2.50797
ENSRNOG00000006740	Castor1	360969	0.154554	9.09127	1.59545	0.128728	0.408829	-4.9371
ENSRNOG00000006746	Olr1607	364275	-0.190902	5.37488	-1.08135	0.294397	0.609853	-5.56109
ENSRNOG00000006747	Cc2d1a	288908	-0.104475	12.4541	-2.27419	0.0359688	0.220739	-3.86365
ENSRNOG00000006751	Psmd6	289924	0.0814374	13.4751	1.65696	0.115562	0.390418	-4.85021
ENSRNOG00000006756	Maged1	84469	-0.0782065	14.7268	-1.86263	0.0795971	0.3252	-4.54323
ENSRNOG00000006762	Snu13	300092	-0.070261	13.7734	-1.58962	0.13004	0.411352	-4.94522
ENSRNOG00000006766	Laptm4b	315047	0.051418	12.6577	0.496038	0.626114	0.846542	-6.00773
ENSRNOG00000006771	Olr729	366116	0.0423675	5.07926	0.258292	0.799232	0.923552	-6.09734
ENSRNOG00000006779	Crot	83842	0.135112	12.3777	1.3506	0.194237	0.50148	-5.25829
ENSRNOG00000006784	Sema4f	29745	-0.435256	10.444	-3.17685	0.00542615	0.0913037	-2.17046
ENSRNOG00000006785	Dcaf8	364050	-0.0869305	12.7287	-1.01927	0.322129	0.637581	-5.62273
ENSRNOG00000006787	Dhcr24	298298	-0.344287	13.5177	-5.2178	6.6012e-05	0.0233047	1.87323
ENSRNOG00000006789	Ddit3	29467	0.117782	11.7379	1.53364	0.143213	0.43392	-5.022
ENSRNOG00000006795	Apmap	366227	0.0198221	12.5582	0.335074	0.7416	0.898037	-6.07448
ENSRNOG00000006800	Tmem246	362518	-0.125007	13.0811	-1.35665	0.192344	0.499187	-5.25086
ENSRNOG00000006802	Lrrn1	500280	-0.0587084	13.2563	-0.801669	0.433625	0.728723	-5.8129
ENSRNOG00000006807	Aldob	24190	0.0314257	6.49695	0.276717	0.785278	0.915908	-6.09239
ENSRNOG00000006810	Lancl2	362375	-0.0420937	13.6761	-0.854975	0.404258	0.707404	-5.77014
ENSRNOG00000006818	Arl6ip5	66028	-0.0532623	14.0982	-0.935859	0.362235	0.672672	-5.70047
ENSRNOG00000006819	Olr731	295919	0.0341215	4.85628	0.380016	0.708562	0.883194	-6.0584
ENSRNOG00000006831	Pgr	25154	-0.0228273	11.0463	-0.196335	0.846638	0.942491	-6.1115
ENSRNOG00000006832	Zdhhc5	362156	-0.249487	13.2392	-3.40463	0.00330838	0.0746272	-1.71874
ENSRNOG00000006839	Arl5a	117050	0.0109448	11.3294	0.172484	0.86506	0.949527	-6.11593
ENSRNOG00000006844	Dnajc14	114481	-0.0981316	11.971	-1.52802	0.144596	0.435615	-5.0296
ENSRNOG00000006853	Elavl2	286973	-0.00935028	12.736	-0.0927258	0.927187	0.971951	-6.12659
ENSRNOG00000006855	Padi4	29512	0.0644485	5.58654	0.463682	0.64866	0.85622	-6.02317
ENSRNOG00000006858	Pyurf	502782	0.212923	12.211	2.64239	0.0169412	0.151271	-3.1985
ENSRNOG00000006859	Insig1	64194	0.148774	13.5	2.89463	0.00994954	0.120131	-2.72042
ENSRNOG00000006865	Laptm4a	298875	-0.0267536	14.4295	-0.371185	0.715009	0.885701	-6.06171
ENSRNOG00000006868	Ube2z	303478	-0.0287518	13.6308	-0.585895	0.565517	0.812803	-5.95955
ENSRNOG00000006870	Mtdh	170910	0.0196107	11.9901	0.317566	0.754617	0.90393	-6.08021
ENSRNOG00000006871	Slc25a14	85263	-0.0685771	12.2252	-0.93171	0.364316	0.674372	-5.70418
ENSRNOG00000006873	Dnase1	25633	-0.16429	5.59939	-1.08612	0.292339	0.607195	-5.55622
ENSRNOG00000006874	Opn1sw	81644	-0.0728077	5.15664	-0.692013	0.498119	0.769977	-5.89281
ENSRNOG00000006876	Msx1	81710	-0.0526799	10.2125	-0.1159	0.909067	0.964944	-6.12415
ENSRNOG00000006877	Efnb1	25186	-0.0687383	10.8801	-0.71921	0.481621	0.76077	-5.87401
ENSRNOG00000006878	Slc26a3	114629	0.109171	6.66117	0.537077	0.598059	0.830525	-5.98668
ENSRNOG00000006889	Ambp	25377	-0.00573181	5.97137	-0.0506678	0.960171	0.985519	-6.12963
ENSRNOG00000006894	Tor1a	266606	-0.0619432	11.4028	-0.840803	0.411936	0.712369	-5.78176
ENSRNOG00000006899	Akap14	60332	0.257312	8.28812	0.734989	0.472199	0.755031	-5.8628
ENSRNOG00000006901	Cd320	362851	0.103862	11.5522	1.0603	0.303597	0.619714	-5.58234
ENSRNOG00000006911	Sptb	314251	-0.640181	11.0647	-4.99988	0.000104363	0.0251188	1.45499
ENSRNOG00000006913	Rpain	287463	0.161038	10.7042	2.50398	0.0225695	0.175475	-3.45373
ENSRNOG00000006916	Sardh	114123	0.171877	9.96784	3.31638	0.00400912	0.0808527	-1.89438
ENSRNOG00000006920	Htr3b	58963	0.0606107	6.47882	0.427005	0.674646	0.86725	-6.03945
ENSRNOG00000006926	Atp6v0d2	297932	-0.140857	5.40125	-0.681101	0.504829	0.774261	-5.90015
ENSRNOG00000006931	Eepd1	315500	-0.0172827	11.4076	-0.245837	0.808703	0.926843	-6.10049
ENSRNOG00000006934	Acvr1b	29381	-0.524384	10.3998	-3.81499	0.00134929	0.0556772	-0.89591
ENSRNOG00000006946	Arhgap9	362893	0.216547	9.07237	1.42966	0.170636	0.47186	-5.15908
ENSRNOG00000006947	Pdhx	311254	0.0369181	11.5522	0.505988	0.619256	0.841926	-6.00277
ENSRNOG00000006949	C1qbp	29681	0.0699284	13.7217	1.60303	0.127039	0.406218	-4.92652
ENSRNOG00000006950	Padi3	29520	0.123893	7.66397	0.747498	0.46481	0.748912	-5.85375
ENSRNOG00000006957	Gria4	29629	0.130282	11.788	1.09874	0.286946	0.600595	-5.54324
ENSRNOG00000006963	Ctse	25424	0.100081	8.22348	0.608494	0.550771	0.805578	-5.94622
ENSRNOG00000006966	Nfia	25492	0.0591165	13.3561	0.956473	0.352018	0.663151	-5.68181
ENSRNOG00000006967	Xiap	63879	0.0453666	11.1937	0.684077	0.502994	0.773188	-5.89816
ENSRNOG00000006968	Mrpl19	297372	-0.0323428	10.5096	-0.405348	0.690194	0.873835	-6.04845
ENSRNOG00000006973	RGD1307947	314788	0.0611479	10.8438	0.697121	0.494995	0.768913	-5.88933
ENSRNOG00000006978	Mterf2	366856	0.129542	10.0654	1.46557	0.160717	0.458551	-5.11258
ENSRNOG00000006979	Hpca	29177	0.0833362	15.3866	0.972646	0.344142	0.657124	-5.66691
ENSRNOG00000006980	Vcpip1	286761	0.0101095	12.8424	0.168715	0.867979	0.94987	-6.11658
ENSRNOG00000006983	Nr2c1	252924	0.122696	11.0522	2.24053	0.0384633	0.227581	-3.92206
ENSRNOG00000006989	Vamp2	24803	-0.267064	14.4612	-2.71269	0.0146221	0.141789	-3.0668
ENSRNOG00000006990	Grb7	84427	-0.30525	5.94992	-1.16732	0.258928	0.572964	-5.47053
ENSRNOG00000006997	App	54226	-0.0652252	15.3503	-1.51083	0.148894	0.442826	-5.05271
ENSRNOG00000006998	Fhl4	314678	-0.0376638	8.20925	-0.290217	0.775102	0.912418	-6.08854
ENSRNOG00000006999	Wdr78	313417	0.221284	10.8675	1.01467	0.324254	0.639254	-5.62717
ENSRNOG00000007002	Lif	60584	-0.498404	5.93695	-3.48188	0.00279537	0.0716701	-1.56447
ENSRNOG00000007006	Slc3a1	29484	0.0692974	6.02364	0.369147	0.7165	0.886584	-6.06247
ENSRNOG00000007014	Cnksr2	59322	-0.26877	13.6508	-2.10741	0.0499734	0.258322	-4.14843
ENSRNOG00000007023	Galm	313843	0.0631895	11.4217	0.56993	0.576057	0.818937	-5.96867
ENSRNOG00000007027	Hgf	24446	-0.256758	8.13238	-0.948339	0.356026	0.666667	-5.68922
ENSRNOG00000007029	Dnaja1	65028	0.0399017	14.7008	0.908606	0.37605	0.68394	-5.72458
ENSRNOG00000007030	Epha7	171287	-0.185924	11.6974	-1.2604	0.224272	0.538107	-5.36592
ENSRNOG00000007031	Trim9	155812	-0.289897	12.3984	-3.76454	0.00150676	0.057808	-0.997358
ENSRNOG00000007032	Amigo2	300186	0.321688	12.3743	1.93896	0.0690065	0.30396	-4.42334
ENSRNOG00000007036	Tgfbr1	29591	0.161387	11.7815	2.22846	0.0393964	0.230102	-3.9429
ENSRNOG00000007038	Cntn5	114589	-0.0777796	10.0756	-0.391988	0.699857	0.877191	-6.05377
ENSRNOG00000007040	Timm17a	54311	0.089743	13.553	1.78391	0.0920008	0.347472	-4.6636
ENSRNOG00000007041	Abcg2	312382	-0.0099772	9.68754	-0.0590952	0.953554	0.982188	-6.12916
ENSRNOG00000007048	Rap1b	171337	0.001416	14.3585	0.0301786	0.97627	0.991739	-6.13046
ENSRNOG00000007051	Rraga	117044	-0.103944	13.9043	-1.71316	0.104557	0.372164	-4.76877
ENSRNOG00000007059	Atp1b4	84396	-0.0579299	5.60282	-0.679486	0.505826	0.775042	-5.90123
ENSRNOG00000007060	Plin2	298199	0.158063	12.0882	2.06676	0.0540694	0.27012	-4.216
ENSRNOG00000007066	Htr5a	25689	-0.438131	7.94713	-2.68072	0.0156365	0.146715	-3.12686
ENSRNOG00000007067	Padi1	54282	0.0347264	4.98944	0.257686	0.799691	0.92359	-6.09749
ENSRNOG00000007069	Adhfe1	362474	0.2687	13.1725	4.4574	0.000333008	0.0351618	0.390932
ENSRNOG00000007078	Ccn4	65154	-0.00396221	7.54231	-0.0237923	0.981291	0.992536	-6.13064
ENSRNOG00000007081	Xdh	497811	-0.0505949	10.0894	-0.62285	0.541512	0.799294	-5.9375
ENSRNOG00000007084	2019-03-10	303596	0.409877	6.13045	1.72434	0.102478	0.367777	-4.75234
ENSRNOG00000007089	Lgmn	63865	-0.0130177	13.1476	-0.211975	0.834606	0.937827	-6.10829
ENSRNOG00000007090	Cacna1c	24239	-0.311446	10.5152	-2.35811	0.0303883	0.203414	-3.71613
ENSRNOG00000007091	Ly6e	362934	-0.132821	14.0857	-1.79281	0.0905183	0.345681	-4.65016
ENSRNOG00000007092	Fgb	24366	0.008023	4.89914	0.0765698	0.939845	0.977461	-6.12796
ENSRNOG00000007104	Itpr1	25262	0.046173	14.0775	0.439952	0.665422	0.863983	-6.03386
ENSRNOG00000007111	Nrdc	25499	0.083608	13.1883	2.27763	0.0357223	0.219725	-3.85766
ENSRNOG00000007114	Psma6	29673	-0.0517466	13.6536	-1.27928	0.217701	0.532002	-5.34389
ENSRNOG00000007115	Crebl2	362453	0.0576478	13.3238	0.951938	0.354248	0.665097	-5.68595
ENSRNOG00000007117	Cluap1	363544	0.16625	12.8141	2.88026	0.0102586	0.121321	-2.74803
ENSRNOG00000007120	Mtmr3	305482	-0.219308	11.655	-3.30646	0.00409657	0.081351	-1.9141
ENSRNOG00000007124	Krcc1	312437	0.25306	12.5727	3.11895	0.00614936	0.0967674	-2.28432
ENSRNOG00000007125	Vps54	286932	0.0224391	10.6821	0.290588	0.774823	0.912255	-6.08844
ENSRNOG00000007126	Gpr19	312787	-0.0295705	11.5341	-0.616215	0.545781	0.801849	-5.94156
ENSRNOG00000007128	Nop56	362214	-0.0346427	13.7997	-0.647829	0.525606	0.787328	-5.92188
ENSRNOG00000007129	Cd8b	24931	-0.401382	5.85295	-3.50598	0.00265209	0.0700165	-1.51626
ENSRNOG00000007134	Strap	297699	0.0160755	13.545	0.384676	0.705168	0.880812	-6.05661
ENSRNOG00000007136	Anxa7	155423	-0.304436	12.2879	-3.21011	0.00504923	0.0880065	-2.10487
ENSRNOG00000007137	Ly6i	246138	0.247175	4.50484	2.67248	0.0159086	0.14805	-3.14229
ENSRNOG00000007139	Ttpa	25571	0.242619	11.1483	3.75423	0.00154115	0.057808	-1.01809
ENSRNOG00000007142	B3gat1	117108	-0.307546	13.0756	-2.51594	0.0220207	0.173759	-3.43191
ENSRNOG00000007152	Bhlhe40	79431	-0.00879684	13.1179	-0.0612255	0.951882	0.981963	-6.12903
ENSRNOG00000007158	Qtrt1	64016	-0.068069	10.2572	-0.717745	0.482501	0.761343	-5.87504
ENSRNOG00000007159	Ccl2	24770	0.0565046	6.28227	0.155383	0.878319	0.953547	-6.11875
ENSRNOG00000007177	Kdelc2	315664	0.0299994	9.93898	0.376407	0.711194	0.884654	-6.05976
ENSRNOG00000007178	Cd8a	24930	0.162159	5.00489	1.4526	0.164243	0.463246	-5.12948
ENSRNOG00000007197	Nr1h4	60351	-0.0124523	5.57057	-0.0595403	0.953205	0.982188	-6.12913
ENSRNOG00000007206	LOC361016	361016	-0.00608146	11.8092	-0.0364804	0.971317	0.990754	-6.13025
ENSRNOG00000007213	Yars	313047	0.0220649	13.3451	0.373051	0.713645	0.885078	-6.06102
ENSRNOG00000007221	Dut	497778	0.165307	10.2617	1.5401	0.141638	0.430653	-5.01325
ENSRNOG00000007229	Nr0b2	117274	-0.011848	6.17696	-0.0583475	0.954141	0.982188	-6.1292
ENSRNOG00000007231	Spam1	117037	-0.0346925	5.20717	-0.194758	0.847853	0.943136	-6.11181
ENSRNOG00000007234	Cyp51	25427	0.172752	13.3621	4.60197	0.000243831	0.0322805	0.67727
ENSRNOG00000007235	Atp5mc1	29754	-0.139308	13.9705	-2.92501	0.00932528	0.117605	-2.66188
ENSRNOG00000007237	Id2	25587	-0.0122397	13.4593	-0.169883	0.867075	0.949776	-6.11638
ENSRNOG00000007238	LOC297756	297756	0.140011	5.47518	1.16582	0.259521	0.573178	-5.47217
ENSRNOG00000007240	Rrs1	297784	-0.00311271	9.90924	-0.0409923	0.967772	0.989272	-6.13007
ENSRNOG00000007243	Havcr1	286934	0.10283	5.54702	0.984823	0.338294	0.651832	-5.65555
ENSRNOG00000007249	Cdkn1b	83571	0.663068	11.8997	3.32091	0.00396983	0.0807219	-1.88539
ENSRNOG00000007255	Zpbp2	363676	0.0907486	6.36288	0.493784	0.627673	0.846608	-6.00883
ENSRNOG00000007256	Necab1	64169	-0.162033	12.6231	-0.72688	0.477027	0.758187	-5.86859
ENSRNOG00000007262	Ccdc134	500909	0.333192	11.1344	2.7427	0.0137277	0.137988	-3.0102
ENSRNOG00000007266	RGD1311251	315665	0.08133	7.11059	0.280747	0.782236	0.915105	-6.09126
ENSRNOG00000007267	Mnat1	266713	0.0917991	11.5137	1.5227	0.145916	0.437793	-5.03678
ENSRNOG00000007272	Rnf103	84508	0.0456264	11.8126	0.819528	0.42364	0.720118	-5.79886
ENSRNOG00000007280	Naa60	363545	-0.153502	13.018	-3.02918	0.00746067	0.107163	-2.45988
ENSRNOG00000007284	Slc2a1	24778	0.0331635	14.5114	0.673269	0.509677	0.777311	-5.90536
ENSRNOG00000007286	Mdm1	314859	0.0535359	10.7223	0.352739	0.728548	0.891654	-6.0684
ENSRNOG00000007290	Atp1a2	24212	-0.0457545	14.9668	-0.613488	0.547541	0.803071	-5.94321
ENSRNOG00000007291	Terf1	297758	-0.0241895	10.0053	-0.262825	0.795792	0.920792	-6.09615
ENSRNOG00000007292	Spdl1	303037	0.0683364	7.87008	0.455205	0.654626	0.859006	-6.02705
ENSRNOG00000007299	Caap1	500501	-0.0417192	11.8716	-0.785421	0.442838	0.734621	-5.82543
ENSRNOG00000007300	C1qtnf6	315114	-0.361187	7.51494	-1.98144	0.0636736	0.292359	-4.3553
ENSRNOG00000007301	Gdf9	59304	-0.330508	7.57349	-3.39962	0.00334471	0.0749925	-1.72873
ENSRNOG00000007302	Fbn1	83727	-0.1189	10.2599	-0.497229	0.625292	0.845902	-6.00714
ENSRNOG00000007310	Klrb1b	25192	0.129397	6.69406	1.13069	0.27363	0.587166	-5.50984
ENSRNOG00000007316	Idh3B	94173	0.0523416	13.9536	0.988325	0.336625	0.650478	-5.65226
ENSRNOG00000007319	Trib3	246273	0.121821	7.08874	0.552456	0.587708	0.826008	-5.97838
ENSRNOG00000007323	Ric8b	314681	0.019613	11.3373	0.312414	0.758462	0.905406	-6.08183
ENSRNOG00000007326	Prepl	298771	-0.403528	13.231	-2.48885	0.0232821	0.177824	-3.48127
ENSRNOG00000007327	Pars2	313429	-0.0918023	9.61104	-0.857241	0.403039	0.706642	-5.76827
ENSRNOG00000007330	Capzb	298584	-0.00149834	14.8528	-0.0365949	0.971227	0.990754	-6.13025
ENSRNOG00000007332	Sstr3	171044	-0.354599	10.942	-2.20388	0.041361	0.235938	-3.98513
ENSRNOG00000007335	Ccl11	29397	-0.111335	8.2322	-0.650564	0.52388	0.785755	-5.92013
ENSRNOG00000007346	Grasp	192254	-0.49785	9.7996	-3.75335	0.00154411	0.057808	-1.01986
ENSRNOG00000007348	Olr1087	299586	0.184749	4.86175	1.35863	0.191728	0.498242	-5.24842
ENSRNOG00000007350	Rac2	366957	-0.343094	8.91032	-2.11686	0.0490623	0.255135	-4.13261
ENSRNOG00000007351	Ggh	25455	0.128234	12.2821	2.02728	0.0583378	0.280738	-4.28089
ENSRNOG00000007354	Trpa1	312896	0.170577	5.54162	0.939341	0.360495	0.671272	-5.69735
ENSRNOG00000007356	Chmp3	282834	0.076349	13.1237	1.35789	0.191958	0.498662	-5.24933
ENSRNOG00000007364	Rab15	299156	-0.169765	13.9546	-2.61746	0.0178446	0.154593	-3.24487
ENSRNOG00000007367	2019-09-04	287606	0.0593477	14.6119	0.819706	0.423541	0.720118	-5.79872
ENSRNOG00000007369	Shisa4	360848	0.0732579	14.703	1.30183	0.210055	0.519928	-5.31724
ENSRNOG00000007370	Rnf144a	500636	-0.284956	10.7083	-1.82292	0.0856567	0.337249	-4.60438
ENSRNOG00000007372	Casp1	25166	0.0287517	7.90746	0.174973	0.863134	0.949149	-6.11549
ENSRNOG00000007374	Tac1	24806	0.614503	11.4056	1.9878	0.0629079	0.290694	-4.34504
ENSRNOG00000007375	Ccdc105	500800	-0.0327562	5.76073	-0.289082	0.775956	0.912687	-6.08887
ENSRNOG00000007377	Slit3	83467	-0.474636	10.7794	-3.84424	0.00126565	0.0536805	-0.83708
ENSRNOG00000007378	Acox2	252898	0.197425	8.07986	2.04187	0.0567266	0.277576	-4.257
ENSRNOG00000007387	Per1	287422	-0.219661	12.7382	-1.67115	0.112694	0.386404	-4.82983
ENSRNOG00000007392	Atp6v1f	116664	0.0809933	14.1828	1.4268	0.171448	0.47322	-5.16275
ENSRNOG00000007393	Ndrg1	299923	0.00269051	12.6712	0.0200736	0.984215	0.993832	-6.13072
ENSRNOG00000007395	Baat	29725	-0.0685988	5.98055	-0.401049	0.693297	0.875171	-6.05018
ENSRNOG00000007400	Srebf2	300095	-0.0507338	13.1141	-0.456656	0.653604	0.858511	-6.02639
ENSRNOG00000007404	Svbp	362578	0.101467	9.3057	1.34024	0.197517	0.504889	-5.27096
ENSRNOG00000007410	Dab1	266729	-0.221318	12.3326	-3.02211	0.00757483	0.108089	-2.47365
ENSRNOG00000007412	Dok1	312477	0.0552003	8.24841	0.47527	0.640543	0.853119	-6.01776
ENSRNOG00000007415	Ptgs1	24693	0.130388	10.0026	1.59383	0.129091	0.408939	-4.93936
ENSRNOG00000007416	Clp1	311166	-0.0359061	10.5315	-0.573967	0.573382	0.817941	-5.96639
ENSRNOG00000007420	Hrh1	24448	0.0304451	9.99088	0.405377	0.690173	0.873835	-6.04844
ENSRNOG00000007427	Entpd6	85260	-0.141079	12.221	-2.11442	0.0492959	0.256196	-4.1367
ENSRNOG00000007439	Unc13d	192177	-0.0253466	8.40434	-0.242358	0.811354	0.928006	-6.10135
ENSRNOG00000007442	Ubl7	300744	-0.112157	12.5746	-2.05011	0.0558344	0.274478	-4.24346
ENSRNOG00000007443	Jag1	29146	-0.394073	7.67352	-1.23276	0.234164	0.548821	-5.39768
ENSRNOG00000007456	Calb1	83839	-0.0236641	13.6246	-0.266038	0.793356	0.919098	-6.0953
ENSRNOG00000007457	Serping1	295703	0.209981	11.3612	0.968688	0.346058	0.65854	-5.67058
ENSRNOG00000007461	Klhl41	117537	-0.131175	7.19781	-0.839735	0.412519	0.712943	-5.78263
ENSRNOG00000007468	Ifng	25712	-0.0351374	4.77401	-0.360741	0.722663	0.888586	-6.06554
ENSRNOG00000007477	Edn3	366270	-0.0752572	7.25799	-0.575394	0.572439	0.817305	-5.96558
ENSRNOG00000007478	Cry2	170917	-0.152841	13.1174	-1.81925	0.0862355	0.337853	-4.60998
ENSRNOG00000007485	Arfgef2	296380	-0.118382	11.8049	-1.01182	0.325574	0.640896	-5.62991
ENSRNOG00000007486	Atg7	312647	-0.146859	12.1055	-3.15702	0.00566391	0.0930834	-2.20951
ENSRNOG00000007490	Gabrr2	29695	0.0764286	8.82229	0.21143	0.835024	0.937827	-6.1084
ENSRNOG00000007492	Rpn2	64701	-0.0720564	14.0295	-1.21363	0.241208	0.555591	-5.41932
ENSRNOG00000007495	Smpx	84416	0.246532	5.8852	0.686971	0.501213	0.771819	-5.89622
ENSRNOG00000007500	Top1mt	300029	-0.0314278	11.4294	-0.342137	0.736372	0.896237	-6.07208
ENSRNOG00000007504	Actr10	299121	0.00634992	13.3703	0.139022	0.89104	0.957757	-6.12118
ENSRNOG00000007506	Ndufaf4	362495	0.0311163	12.1559	0.755808	0.459939	0.745602	-5.84765
ENSRNOG00000007509	Slc1a6	84012	-0.362984	8.3791	-1.68217	0.110509	0.381358	-4.81392
ENSRNOG00000007519	Tmem43	362401	-0.17818	10.7626	-3.4381	0.00307556	0.0731666	-1.65196
ENSRNOG00000007523	Cct6b	363658	-0.0736706	7.09338	-0.703008	0.49141	0.767062	-5.88529
ENSRNOG00000007525	Defb22	171412	-0.115693	5.79158	-0.78506	0.443044	0.734796	-5.82571
ENSRNOG00000007528	Kcnh7	170739	-0.37037	9.21305	-2.41343	0.0271635	0.190105	-3.61747
ENSRNOG00000007529	Bmf	246142	-0.0799893	7.53222	-0.451851	0.656994	0.860111	-6.02857
ENSRNOG00000007532	RGD1305178	311855	-0.0580536	13.6556	-1.44096	0.167463	0.467151	-5.14455
ENSRNOG00000007539	Rsad2	65190	0.206233	7.96747	1.16695	0.259074	0.572968	-5.47093
ENSRNOG00000007542	Scg5	25719	-0.0135823	14.6957	-0.214713	0.832503	0.936698	-6.1077
ENSRNOG00000007545	Angptl4	362850	-0.0498717	10.4957	-0.489763	0.630458	0.847726	-6.0108
ENSRNOG00000007546	Asns	25612	-0.102819	12.831	-1.3544	0.193047	0.500442	-5.25363
ENSRNOG00000007558	Defb36	641640	-0.0227972	6.76757	-0.194005	0.848433	0.943358	-6.11196
ENSRNOG00000007567	Rem1	366232	0.140279	8.66186	1.45018	0.164907	0.463517	-5.13261
ENSRNOG00000007568	Spata6	171413	0.363556	11.2822	1.79075	0.0908583	0.345871	-4.65327
ENSRNOG00000007574	Padi2	29511	0.0572573	12.5717	0.618328	0.54442	0.801329	-5.94027
ENSRNOG00000007575	Plppr1	298062	-0.134897	11.8455	-1.53122	0.143808	0.43454	-5.02528
ENSRNOG00000007576	Zfp597	266774	-0.120609	10.9571	-0.5843	0.566566	0.813617	-5.96047
ENSRNOG00000007578	Zfp830	497967	0.116311	12.1613	2.1792	0.0434234	0.24163	-4.02728
ENSRNOG00000007581	Slc17a8	266767	-0.466067	8.74153	-1.80743	0.088127	0.341627	-4.62798
ENSRNOG00000007584	Ehd4	192204	-0.023312	10.8455	-0.29192	0.773822	0.911667	-6.08805
ENSRNOG00000007587	Tcp11l2	314683	-0.000984701	12.5971	-0.0107357	0.991557	0.99738	-6.13086
ENSRNOG00000007596	Rffl	282844	-0.172563	10.9787	-1.1656	0.259605	0.573178	-5.4724
ENSRNOG00000007600	Igsf1	302822	0.347846	12.3976	1.9989	0.061592	0.288391	-4.32709
ENSRNOG00000007601	Inhbe	83711	0.177539	5.08484	1.25226	0.227153	0.541139	-5.37534
ENSRNOG00000007603	Gabrr1	29694	-0.0259776	6.62255	-0.179662	0.859507	0.947585	-6.11466
ENSRNOG00000007604	Igsf8	304979	-0.191222	13.3987	-4.07244	0.000768653	0.0422565	-0.378399
ENSRNOG00000007607	Nr4a1	79240	-0.235989	13.295	-1.8125	0.0873124	0.340393	-4.62028
ENSRNOG00000007611	Hoxb7	497985	-0.0664619	4.02106	-0.475126	0.640644	0.853119	-6.01783
ENSRNOG00000007613	C1qtnf5	315598	0.0520399	12.6067	0.442987	0.663268	0.863345	-6.03252
ENSRNOG00000007624	Il4	287287	-0.0877442	5.51524	-0.886503	0.387512	0.693534	-5.74366
ENSRNOG00000007629	Sf3a3	313583	0.0763671	12.4246	1.77099	0.0941905	0.352837	-4.68302
ENSRNOG00000007640	Npbwr1	297795	-0.0806423	4.57562	-0.572902	0.574087	0.818089	-5.96699
ENSRNOG00000007644	Mbtps2	302705	-0.436349	11.0761	-6.11063	1.07219e-05	0.0151172	3.51732
ENSRNOG00000007645	Kcnj9	116560	-0.409891	10.1633	-3.16456	0.00557233	0.0925356	-2.19467
ENSRNOG00000007646	Sipa1l1	246212	-0.149888	14.1621	-1.99121	0.0625016	0.289878	-4.33954
ENSRNOG00000007647	Oprk1	29335	0.478376	8.43046	3.69092	0.00177011	0.0608631	-1.14533
ENSRNOG00000007648	Rab11b	79434	0.0291953	14.2209	0.591906	0.561575	0.810775	-5.95605
ENSRNOG00000007649	Dnm2	25751	-0.0216444	13.0878	-0.439937	0.665433	0.863983	-6.03386
ENSRNOG00000007650	Cd63	29186	0.0816123	14.4103	1.086	0.292391	0.607195	-5.55634
ENSRNOG00000007652	Il13	116553	0.0165249	5.78426	0.113942	0.910597	0.964944	-6.12438
ENSRNOG00000007657	Col27a1	298101	0.0380921	10.8825	0.343853	0.735103	0.89581	-6.0715
ENSRNOG00000007660	Fntb	64511	-0.142764	12.0515	-2.54579	0.0207052	0.168974	-3.37723
ENSRNOG00000007671	Smu1	117541	-0.0319751	12.7208	-0.643363	0.528431	0.789499	-5.92471
ENSRNOG00000007673	Ppig	83624	0.212038	13.3091	3.41617	0.0032262	0.0741683	-1.69572
ENSRNOG00000007680	Fhl5	297954	0.139888	5.35193	1.38976	0.182239	0.487484	-5.20971
ENSRNOG00000007682	Gria3	29628	-0.0454534	13.7473	-0.68278	0.503793	0.773615	-5.89903
ENSRNOG00000007686	2019-09-03	56003	-0.189388	13.778	-2.00801	0.0605298	0.286195	-4.3123
ENSRNOG00000007688	Sms	363469	-0.00180823	12.3187	-0.0301972	0.976256	0.991739	-6.13046
ENSRNOG00000007699	Golga5	299258	-0.0649378	11.1301	-0.675804	0.508105	0.776362	-5.90368
ENSRNOG00000007700	Inhbc	64549	0.137908	5.51873	1.48091	0.156624	0.451984	-5.09243
ENSRNOG00000007705	Kcnj10	29718	-0.312916	12.9885	-3.18985	0.0052757	0.090446	-2.14485
ENSRNOG00000007706	Prkaa2	78975	-0.0534252	12.2115	-0.60271	0.554526	0.807391	-5.94968
ENSRNOG00000007707	Zfp467	500110	-0.201116	10.4001	-2.7325	0.0140256	0.139131	-3.02946
ENSRNOG00000007725	Mis12	501706	-0.00450133	11.3401	-0.0795169	0.937535	0.976889	-6.12773
ENSRNOG00000007726	Mcam	78967	-0.108728	13.5819	-0.734288	0.472615	0.755468	-5.8633
ENSRNOG00000007727	Lhfpl4	353230	-0.593342	10.5281	-2.89557	0.00992968	0.120131	-2.71861
ENSRNOG00000007730	Vom2r53	286915	-0.199769	5.52486	-1.58171	0.131837	0.413377	-4.95619
ENSRNOG00000007733	Arhgef9	66013	-0.168543	13.6794	-2.29122	0.0347648	0.217798	-3.83394
ENSRNOG00000007735	Pigm	79112	-0.171679	10.1646	-2.71477	0.0145583	0.141518	-3.06288
ENSRNOG00000007740	Tacstd2	494343	0.331826	6.2399	1.23778	0.232345	0.546708	-5.39196
ENSRNOG00000007743	Mgst1	171341	0.488792	11.1607	3.14363	0.00583024	0.0946743	-2.23585
ENSRNOG00000007744	Ehd3	192249	-0.208093	13.0099	-3.34297	0.00378388	0.078751	-1.84155
ENSRNOG00000007752	Zmynd19	311791	0.0374281	12.1845	0.435046	0.668911	0.864984	-6.036
ENSRNOG00000007753	Plaa	116645	0.133926	12.9706	3.60979	0.00211382	0.0630625	-1.30823
ENSRNOG00000007756	Atg101	300240	0.0473847	13.1214	0.895541	0.382798	0.689629	-5.73591
ENSRNOG00000007763	Plod1	116552	0.0611763	12.8512	0.848249	0.40789	0.709005	-5.77568
ENSRNOG00000007766	Pqbp1	302557	0.12118	14.0167	2.62481	0.0175737	0.153971	-3.23122
ENSRNOG00000007769	2019-03-02	362849	0.0907832	11.8893	1.12481	0.276044	0.589263	-5.51605
ENSRNOG00000007771	Dbil5	59116	0.268856	6.14036	2.17295	0.0439606	0.243482	-4.03792
ENSRNOG00000007775	Cmpk1	298410	0.104164	12.0605	1.68575	0.109807	0.380057	-4.80873
ENSRNOG00000007778	Alox15b	266604	-0.484963	5.17751	-2.44526	0.0254565	0.184375	-3.56022
ENSRNOG00000007781	Stau1	84496	0.0120708	13.2134	0.28215	0.781178	0.914756	-6.09086
ENSRNOG00000007782	Ghrh	29446	0.117292	5.89682	0.662363	0.516472	0.781182	-5.91251
ENSRNOG00000007788	Glod4	363644	-0.0753183	11.7873	-1.17424	0.256222	0.570342	-5.46299
ENSRNOG00000007793	Pnrc1	286988	-0.0273059	12.2012	-0.694134	0.49682	0.769891	-5.89137
ENSRNOG00000007795	AABR07058410.1	60667	0.217451	8.06969	2.94854	0.0088682	0.114543	-2.61643
[truncated: 7,533 more rows]

## Sheet: Prefrontal cortex
substanceBXH	geneSymbol	LocusLinkID	logFC	AveExpr	t	P.Value	adj.P.Val	B
ENSRNOG00000000007	Gad1	24379	-0.349409	14.1344	-2.37279	0.0300549	0.642877	-3.41213
ENSRNOG00000000034	Nuak2	289419	-0.0448635	10.2926	-0.462757	0.649559	0.949604	-5.45625
ENSRNOG00000000041	Slc26a1	64076	0.0389575	9.32539	0.330752	0.744978	0.963544	-5.50307
ENSRNOG00000000044	Tmem175	305623	-0.0527491	13.3143	-0.921747	0.369891	0.882511	-5.17921
ENSRNOG00000000047	Cd82	83628	0.044825	14.5388	0.259684	0.798308	0.968865	-5.52192
ENSRNOG00000000048	Gak	81659	0.064254	13.5441	0.917891	0.371848	0.882915	-5.18224
ENSRNOG00000000053	Crp	25419	-0.0148207	6.81248	-0.0954969	0.925066	0.987862	-5.54821
ENSRNOG00000000060	Cplx1	64832	0.0421669	15.305	0.83874	0.413556	0.897842	-5.24187
ENSRNOG00000000064	Atp5me	140608	0.122577	14.3932	1.20389	0.245556	0.825912	-4.92825
ENSRNOG00000000073	Tmed5	289883	-0.315579	9.83614	-1.62143	0.123803	0.745214	-4.46173
ENSRNOG00000000096	Pdzk1	65144	-0.295607	10.5263	-3.21692	0.00519441	0.474345	-2.06362
ENSRNOG00000000105	Cplx2	116657	0.0219953	15.2589	0.411888	0.685702	0.953917	-5.47609
ENSRNOG00000000108	Aga	290923	0.0995711	12.3822	0.979979	0.341194	0.873793	-5.13213
ENSRNOG00000000109	Fgf20	66017	0.044054	6.59431	0.275124	0.786623	0.966498	-5.51821
ENSRNOG00000000121	Pigv	366478	-0.054331	10.0725	-0.435558	0.66878	0.951969	-5.46714
ENSRNOG00000000122	Ak2	24184	-0.0378585	12.5667	-0.286731	0.777874	0.965305	-5.51528
ENSRNOG00000000127	Kpna6	362607	-0.036638	11.2239	-0.336008	0.741084	0.962982	-5.5015
ENSRNOG00000000133	Txndc15	307180	-0.0123618	14.0629	-0.17436	0.863696	0.979213	-5.53861
ENSRNOG00000000145	Pik3r3	60664	-0.211998	13.3063	-1.83226	0.0849526	0.71501	-4.19016
ENSRNOG00000000155	Cog3	361073	-0.121766	11.467	-1.87827	0.0780628	0.698295	-4.12817
ENSRNOG00000000156	LOC100911486	65049	-0.0739125	8.44246	-0.547378	0.591419	0.937392	-5.41829
ENSRNOG00000000157	Atg12	361321	-0.110166	11.5729	-1.30828	0.208641	0.805482	-4.82153
ENSRNOG00000000158	Cdo1	81718	0.133073	13.8574	1.29983	0.211457	0.806236	-4.83043
ENSRNOG00000000161	Chm	24942	-0.12703	11.2459	-1.12365	0.277184	0.836408	-5.00535
ENSRNOG00000000164	Lamp2	24944	0.17794	12.5745	1.32611	0.202799	0.802879	-4.8026
ENSRNOG00000000165	Pfkfb1	24638	-0.181185	6.95497	-0.640967	0.530312	0.924264	-5.36922
ENSRNOG00000000166	Apex2	317628	-0.103476	10.591	-1.23754	0.233141	0.820604	-4.89462
ENSRNOG00000000167	Alas2	25748	-0.229786	10.4779	-0.835509	0.41532	0.898253	-5.24421
ENSRNOG00000000168	Gatm	81660	0.108181	14.5612	1.28574	0.216219	0.810833	-4.84517
ENSRNOG00000000170	Slc30a4	64469	-0.0573693	12.5386	-0.625828	0.539956	0.924835	-5.37766
ENSRNOG00000000172	Sqor	691966	-0.0997823	10.8597	-0.788638	0.441465	0.904493	-5.2771
ENSRNOG00000000177	Plpp2	246115	0.0757637	11.423	0.341084	0.737328	0.962373	-5.49996
ENSRNOG00000000185	Mpst	192172	0.217272	11.391	1.68214	0.111295	0.73597	-4.38575
ENSRNOG00000000186	Tst	25274	0.121066	12.5434	0.795158	0.437768	0.904493	-5.27263
ENSRNOG00000000187	Csf2rb	171081	0.262436	8.43676	0.92985	0.365802	0.881996	-5.17281
ENSRNOG00000000195	LOC108348048	301097	-0.1379	8.9268	-1.11073	0.282549	0.8392	-5.01736
ENSRNOG00000000201	Gsta5	24422	0.177795	6.45353	0.934684	0.363377	0.881996	-5.16897
ENSRNOG00000000204	Syncrip	363113	-0.00887469	11.8419	-0.0920981	0.927725	0.988534	-5.5485
ENSRNOG00000000221	Abhd5	316122	-0.0742145	11.2156	-0.809274	0.429829	0.903827	-5.26283
ENSRNOG00000000233	Grm6	24419	-0.137643	8.2298	-0.801259	0.434325	0.904493	-5.26842
ENSRNOG00000000236	Zfp207	303763	-0.0494539	12.7248	-0.582007	0.568399	0.931096	-5.40099
ENSRNOG00000000239	Ccl7	287561	-0.0703202	7.1805	-0.443459	0.663171	0.951969	-5.46404
ENSRNOG00000000244	Coil	50998	-0.104036	10.6162	-1.04356	0.311678	0.862988	-5.07785
ENSRNOG00000000245	Slc16a6	303772	0.112573	10.1158	0.740039	0.469636	0.91081	-5.30937
ENSRNOG00000000246	Amz2	360650	-0.130669	12.9035	-1.46728	0.161029	0.786967	-4.6459
ENSRNOG00000000248	Srsf2	494445	0.128376	13.0617	0.938765	0.361339	0.881386	-5.16571
ENSRNOG00000000249	Mettl23	287918	0.0671719	10.6001	0.851468	0.406651	0.894121	-5.23261
ENSRNOG00000000250	Jmjd6	360665	-0.0848008	11.2173	-0.927927	0.36677	0.881996	-5.17433
ENSRNOG00000000257	Smpd3	94338	-0.329642	13.0188	-1.60535	0.127311	0.750828	-4.48154
ENSRNOG00000000258	Prmt7	361402	0.0309532	11.8455	0.377592	0.710528	0.956152	-5.4882
ENSRNOG00000000264	Def8	307973	-0.0704249	12.0681	-0.907372	0.377221	0.884089	-5.19044
ENSRNOG00000000274	Phyhipl	309901	-0.134211	15.0947	-1.90561	0.0742075	0.692797	-4.0909
ENSRNOG00000000283	Ess2	360741	-0.0354088	12.3278	-0.543081	0.594307	0.937989	-5.42036
ENSRNOG00000000303	Cep57l1	294519	-0.214522	9.60606	-2.69884	0.0154619	0.556372	-2.90327
ENSRNOG00000000304	Cd164	83689	0.0327602	12.843	0.451166	0.65772	0.949951	-5.46097
ENSRNOG00000000306	Smpd2	83537	0.271057	10.913	1.13504	0.272517	0.836408	-4.99468
ENSRNOG00000000312	Fig4	309855	-0.144256	13.5919	-1.81341	0.0879268	0.719757	-4.21529
ENSRNOG00000000321	Cd24	25145	0.0454099	13.5545	0.357265	0.725405	0.960507	-5.49489
ENSRNOG00000000322	Atg5	365601	-0.0689272	11.7935	-1.11556	0.280535	0.837916	-5.01288
ENSRNOG00000000340	Rtraf	302247	0.0373491	11.7716	0.18598	0.854719	0.97849	-5.53672
ENSRNOG00000000368	Grik2	54257	-0.335509	11.5464	-2.70207	0.0153589	0.556372	-2.89813
ENSRNOG00000000386	Pbld1	171564	-0.121453	11.5745	-0.70957	0.48784	0.916089	-5.32863
ENSRNOG00000000392	Supv3l1	294385	-0.128156	12.6602	-1.17436	0.256858	0.828572	-4.95713
ENSRNOG00000000394	Srgn	56782	-0.0858182	12.6879	-0.678151	0.507039	0.920415	-5.3477
ENSRNOG00000000395	Kif1bp	606294	-0.0780467	14.6137	-1.12055	0.278464	0.836408	-5.00824
ENSRNOG00000000398	Zup1	294390	-0.0970246	11.2582	-0.950269	0.355636	0.878927	-5.15647
ENSRNOG00000000406	Ros1	25346	-0.187118	6.73333	-1.15472	0.264591	0.832671	-4.97601
ENSRNOG00000000413	Pln	64672	0.0901433	8.18529	0.362151	0.721818	0.959156	-5.49332
ENSRNOG00000000420	Nelfe	294258	0.0724052	12.6447	0.812093	0.428255	0.903281	-5.26086
ENSRNOG00000000421	Skiv2l	294260	0.126765	12.1562	1.90861	0.0737952	0.691487	-4.0868
ENSRNOG00000000422	Dxo	361799	-0.0342597	11.6942	-0.349502	0.731116	0.961016	-5.49735
ENSRNOG00000000428	Cyp21a1	24298	0.124613	6.14269	0.696159	0.495982	0.917506	-5.33687
ENSRNOG00000000431	Atf6b	406169	0.134227	13.8897	2.2689	0.036953	0.655822	-3.56909
ENSRNOG00000000432	Fkbpl	406168	0.147204	11.3834	1.21418	0.241708	0.824609	-4.91805
ENSRNOG00000000435	Ppt2	54398	-0.0521729	13.4962	-0.483809	0.634855	0.947129	-5.44738
ENSRNOG00000000436	Egfl8	406166	0.263335	8.68732	1.54022	0.142392	0.766231	-4.56038
ENSRNOG00000000437	Agpat1	406165	0.0856639	14.2723	1.08507	0.293433	0.852011	-5.04085
ENSRNOG00000000439	Ager	81722	0.145632	9.33563	0.767235	0.453739	0.909369	-5.29155
ENSRNOG00000000440	Pbx2	406164	-0.0777778	13.4321	-0.62198	0.542422	0.925554	-5.37977
ENSRNOG00000000441	Gpsm3	406163	-0.0245748	10.6673	-0.120322	0.905676	0.986205	-5.54579
ENSRNOG00000000442	Notch4	406162	0.12689	8.51012	0.880402	0.391236	0.887428	-5.21108
ENSRNOG00000000451	RT1-Ba	309621	-0.282611	7.69636	-0.543308	0.594154	0.937989	-5.42025
ENSRNOG00000000454	RT1-DOb	365542	-0.347993	6.83834	-1.47424	0.159169	0.786967	-4.63787
ENSRNOG00000000455	LOC103689996	24812	0.197909	9.96871	1.77469	0.0943271	0.7279	-4.26641
ENSRNOG00000000456	Psmb8	24968	0.0966243	10.6229	0.518682	0.610842	0.941956	-5.43185
ENSRNOG00000000457	Tap1	24811	0.163593	10.4639	0.971409	0.345317	0.874493	-5.13921
ENSRNOG00000000459	Psmb9	24967	0.214147	8.95199	1.28812	0.215408	0.80933	-4.84269
ENSRNOG00000000461	LOC108348112	294276	0.0178786	14.3737	0.248492	0.806808	0.96943	-5.52448
ENSRNOG00000000464	Rxrb	361801	-0.0302371	13.8034	-0.339139	0.738767	0.962895	-5.50055
ENSRNOG00000000465	Slc39a7	294281	0.158961	13.3021	2.43316	0.0266212	0.632623	-3.31964
ENSRNOG00000000466	Hsd17b8	361802	-0.0296852	12.8547	-0.338918	0.73893	0.962895	-5.50062
ENSRNOG00000000467	Ring1	309626	-0.0630301	13.4578	-0.888566	0.386957	0.887428	-5.20489
ENSRNOG00000000470	Vps52	25218	-0.259667	13.5059	-1.92618	0.0714199	0.687034	-4.06266
ENSRNOG00000000471	B3galt4	171079	0.10255	9.74615	0.803144	0.433265	0.904493	-5.26711
ENSRNOG00000000473	Pfdn6	309629	0.10654	14.6674	1.45294	0.16492	0.788033	-4.66235
ENSRNOG00000000474	Rgl2	294283	0.0834987	12.8542	0.860637	0.401724	0.892701	-5.22586
ENSRNOG00000000476	Zbtb22	309630	0.0651771	12.3392	0.749292	0.46419	0.91047	-5.30338
ENSRNOG00000000477	Daxx	140926	0.0823286	12.196	1.15564	0.264227	0.832671	-4.97514
ENSRNOG00000000479	Kifc1	294286	-0.0578157	9.03674	-0.36075	0.722846	0.9595	-5.49377
ENSRNOG00000000480	Phf1	294287	0.21748	11.1319	0.636953	0.53286	0.924666	-5.37148
ENSRNOG00000000481	Cuta	294288	0.0986977	13.3924	1.18962	0.250967	0.828093	-4.94228
ENSRNOG00000000483	Syngap1	192117	0.275189	12.9006	0.630153	0.537191	0.924666	-5.37527
ENSRNOG00000000485	Bak1	116502	0.0492197	10.9238	0.566804	0.578448	0.933513	-5.40871
ENSRNOG00000000486	Ggnbp1	494520	0.101718	7.48532	0.804544	0.432479	0.904493	-5.26613
ENSRNOG00000000487	Grm4	24417	-0.229269	12.2379	-1.33378	0.200326	0.802307	-4.7944
ENSRNOG00000000488	Hmga1	117062	-0.107168	12.9462	-1.22834	0.236487	0.82062	-4.90389
ENSRNOG00000000490	Rps10	81773	0.0872207	14.4821	0.942822	0.359321	0.881367	-5.16246
ENSRNOG00000000499	Tcp11	309641	-0.0360041	6.70959	-0.256484	0.800735	0.969305	-5.52267
ENSRNOG00000000503	Ppard	25682	0.0359691	11.1762	0.176612	0.861954	0.979045	-5.53825
ENSRNOG00000000505	Rpl10a	81729	0.0979642	14.4272	1.41501	0.17559	0.79005	-4.70531
ENSRNOG00000000506	Tead3	294299	0.0715434	8.21081	0.536113	0.599006	0.939151	-5.42369
ENSRNOG00000000510	Clps	25680	-0.141918	6.65352	-0.917422	0.372087	0.882915	-5.18261
ENSRNOG00000000511	Srpk1	361811	-0.198873	13.7834	-1.61765	0.124619	0.745214	-4.4664
ENSRNOG00000000513	Mapk14	81649	-0.0808384	13.3324	-0.88977	0.386329	0.887428	-5.20398
ENSRNOG00000000515	Mapk13	29513	0.0557338	6.40982	0.265248	0.794091	0.968062	-5.52061
ENSRNOG00000000519	Stk38	361813	-0.016093	11.924	-0.14052	0.889944	0.983392	-5.54341
ENSRNOG00000000520	Srsf3	361814	0.0255433	14.5955	0.43052	0.672367	0.951969	-5.46909
ENSRNOG00000000521	Cdkn1a	114851	0.368705	10.6325	0.700474	0.493354	0.916517	-5.33424
ENSRNOG00000000523	Ppil1	309651	0.00263376	10.7227	0.0279845	0.978009	0.994841	-5.55198
ENSRNOG00000000524	RGD735065	294311	-0.021059	13.6051	-0.347363	0.732693	0.961281	-5.49802
ENSRNOG00000000529	Pim1	24649	-0.442594	8.17065	-1.88749	0.0767432	0.697457	-4.11564
ENSRNOG00000000532	Cmtr1	309656	0.0191753	13.4212	0.283085	0.780619	0.965305	-5.51621
ENSRNOG00000000540	Btbd9	294318	0.0195286	12.9656	0.163452	0.87214	0.981519	-5.54027
ENSRNOG00000000541	Glo1	294320	0.113137	14.2024	1.38153	0.185467	0.793598	-4.74251
ENSRNOG00000000543	Frk	79209	0.0993986	7.10281	0.999922	0.331732	0.86998	-5.11542
ENSRNOG00000000547	Tspyl4	309828	0.0545415	15.1485	0.793523	0.438693	0.904493	-5.27376
ENSRNOG00000000549	Tspyl1	29544	-0.0566084	14.5331	-0.969199	0.346385	0.875562	-5.14103
ENSRNOG00000000557	Sar1a	294504	-0.116996	14.3198	-1.75138	0.0983717	0.729676	-4.29684
ENSRNOG00000000559	Npffr1	64107	-0.232722	6.42008	-0.945332	0.358076	0.880121	-5.16045
ENSRNOG00000000562	Prf1	50669	-0.253158	7.36448	-1.85967	0.0807858	0.703243	-4.15334
ENSRNOG00000000565	Sgpl1	286896	-0.0279043	11.5531	-0.31956	0.753297	0.963675	-5.50634
ENSRNOG00000000566	Pcbd1	29700	-0.174778	10.9208	-0.769941	0.452176	0.909121	-5.28974
ENSRNOG00000000567	Unc5b	60630	0.104679	13.3395	0.710445	0.487311	0.915878	-5.32809
ENSRNOG00000000568	Slc29a3	353307	0.21724	11.609	1.89203	0.0761013	0.696526	-4.10946
ENSRNOG00000000569	Vsir	690899	0.352314	12.15	1.95951	0.0671025	0.673727	-4.01654
ENSRNOG00000000571	Psap	25524	0.0857078	15.4047	1.61949	0.124221	0.745214	-4.46412
ENSRNOG00000000572	Chst3	84468	0.15567	8.05469	0.799958	0.435058	0.904493	-5.26932
ENSRNOG00000000585	Amd1	81640	-0.0277651	13.8731	-0.410544	0.686669	0.953917	-5.47659
ENSRNOG00000000588	Slc16a10	170566	-0.178739	8.53318	-0.937934	0.361754	0.881386	-5.16638
ENSRNOG00000000590	Naglt1	337920	-0.165772	7.3646	-0.903967	0.378972	0.884732	-5.19308
ENSRNOG00000000593	Rev3l	309812	-0.0283053	12.0953	-0.283167	0.780557	0.965305	-5.51619
ENSRNOG00000000595	Traf3ip2	361857	-0.028667	9.89259	-0.199369	0.844401	0.978066	-5.53439
ENSRNOG00000000596	Fyn	25150	0.0176431	14.6475	0.267872	0.792105	0.967745	-5.51998
ENSRNOG00000000609	Ipmk	171458	-0.183864	11.767	-3.1467	0.00603203	0.48895	-2.17863
ENSRNOG00000000613	Tfam	83474	-0.134313	12.3035	-1.41071	0.176833	0.790671	-4.71012
ENSRNOG00000000618	Mdga2	314180	-0.217997	11.2962	-2.06127	0.0553342	0.669061	-3.87304
ENSRNOG00000000632	Cdk1	54237	-0.0862289	7.55016	-0.342742	0.736103	0.961828	-5.49945
ENSRNOG00000000638	Zfp365	499425	-0.236165	14.2802	-1.59585	0.129421	0.7536	-4.49318
ENSRNOG00000000640	Egr2	114090	-0.458448	12.4093	-0.974464	0.343843	0.874493	-5.13669
ENSRNOG00000000641	Nrbf2	58839	0.0342303	12.091	0.414121	0.684098	0.953755	-5.47527
ENSRNOG00000000653	Nr5a2	60349	0.0221323	6.97223	0.126468	0.900884	0.986052	-5.54511
ENSRNOG00000000658	Acacb	116719	0.083222	9.68377	0.579806	0.569849	0.931096	-5.40212
ENSRNOG00000000663	Tfip11	288718	-0.0171189	12.4281	-0.191241	0.850661	0.978066	-5.53582
ENSRNOG00000000664	Tpst2	288719	0.22984	11.2668	2.02544	0.0592455	0.669061	-3.92401
ENSRNOG00000000665	Pitpnb	114561	-0.0496066	12.806	-0.737961	0.470864	0.91081	-5.31071
ENSRNOG00000000692	Ung	304577	0.0792853	9.58803	0.483309	0.635203	0.947129	-5.44759
ENSRNOG00000000693	Svop	171442	0.0423908	14.5189	0.536534	0.598722	0.939151	-5.42349
ENSRNOG00000000699	Selplg	363930	-0.0649206	13.4499	-0.153995	0.879474	0.982039	-5.54162
ENSRNOG00000000704	Cmklr1	60669	-0.100991	9.34281	-0.426813	0.675011	0.951969	-5.4705
ENSRNOG00000000715	Pou1f1	25517	0.0421497	6.67709	0.223579	0.825819	0.974031	-5.52978
ENSRNOG00000000716	Htr1f	60448	-0.418598	8.32018	-2.51567	0.0225228	0.608181	-3.19185
ENSRNOG00000000720	MGC95208	304176	0.00444011	10.8498	0.0627629	0.950706	0.992177	-5.55055
ENSRNOG00000000723	RT1-CE5	309607	0.212118	8.90958	0.952324	0.354623	0.878927	-5.1548
ENSRNOG00000000726	Olr1671	294138	-0.0772549	5.94092	-0.638748	0.53172	0.924666	-5.37047
ENSRNOG00000000728	Clic2	294141	-0.126452	7.77511	-0.570682	0.575875	0.933159	-5.40676
ENSRNOG00000000729	Tmlhe	170898	0.0628407	10.2286	0.783759	0.444244	0.907183	-5.28043
ENSRNOG00000000746	Olr1695	294159	0.114025	6.93592	0.523911	0.60728	0.941173	-5.42943
ENSRNOG00000000747	Olr1694	406008	-0.284487	6.66871	-1.16751	0.259537	0.828757	-4.96375
ENSRNOG00000000749	Olr1693	365523	0.0658524	6.48387	0.495941	0.626452	0.946258	-5.44209
ENSRNOG00000000759	Olr1730	294187	0.138893	5.91457	0.819013	0.424406	0.899893	-5.25598
ENSRNOG00000000763	RT1-M3-1	24747	0.0456108	11.9687	0.447187	0.660532	0.951172	-5.46256
ENSRNOG00000000765	Olr1743	294197	0.317799	7.47891	1.67391	0.112924	0.73597	-4.39616
ENSRNOG00000000768	Ubd	29168	-0.136831	6.65087	-0.734616	0.472846	0.91081	-5.31286
ENSRNOG00000000774	Gabbr1	81657	0.148554	14.1102	1.37581	0.187199	0.794823	-4.7488
ENSRNOG00000000775	Mog	24558	0.0408348	14.2671	0.243219	0.810822	0.970218	-5.52565
ENSRNOG00000000777	RT1-S3	294228	-0.0722943	11.7964	-0.450418	0.658249	0.950254	-5.46127
ENSRNOG00000000779	Znrd1	361784	0.0678965	10.7994	1.01271	0.325766	0.86998	-5.10456
ENSRNOG00000000780	Ppp1r11	294207	-0.0418864	15.0802	-0.594626	0.560129	0.929841	-5.39444
ENSRNOG00000000781	Rnf39	171387	0.477254	11.2869	1.75582	0.0975903	0.729676	-4.29107
ENSRNOG00000000782	Trim10	294210	-0.20973	7.34941	-0.946036	0.357727	0.879885	-5.15988
ENSRNOG00000000783	Trim40	365528	-0.184337	8.35223	-0.821103	0.423248	0.899893	-5.2545
ENSRNOG00000000785	Trim39	309591	0.020368	12.0925	0.261735	0.796753	0.968428	-5.52144
ENSRNOG00000000786	Rpp21	406230	0.150749	10.5526	1.42484	0.172773	0.788895	-4.69426
ENSRNOG00000000795	RT1-N3	24750	0.28358	7.70758	1.48563	0.156159	0.78393	-4.62466
ENSRNOG00000000798	Gnl1	309593	-0.0211564	14.1952	-0.269031	0.791228	0.967293	-5.5197
ENSRNOG00000000800	Man1a1	294410	-0.521703	11.9588	-2.38857	0.0291192	0.642877	-3.38804
ENSRNOG00000000801	Msl3l2	309790	-0.0139803	10.1351	-0.112578	0.911718	0.986205	-5.54661
ENSRNOG00000000804	Mrps18b	294230	-0.0211789	12.8674	-0.309725	0.760633	0.963675	-5.50911
ENSRNOG00000000805	Gja1	24392	-0.040618	15.5285	-0.70659	0.489642	0.916089	-5.33048
ENSRNOG00000000808	Hsf2	64441	-0.162738	10.5939	-2.00544	0.0615359	0.669061	-3.95225
ENSRNOG00000000809	Atat1	361789	-0.150579	13.8036	-1.56624	0.136194	0.761572	-4.52915
ENSRNOG00000000811	Pkib	24678	0.133547	8.57061	0.656107	0.520766	0.923857	-5.3606
ENSRNOG00000000812	RGD1302996	294231	0.0978491	13.3649	1.12258	0.277623	0.836408	-5.00635
ENSRNOG00000000814	Fabp7	80841	-0.0022375	14.0327	-0.019602	0.984595	0.997148	-5.55216
ENSRNOG00000000815	Smpdl3a	294422	0.139946	11.3354	1.23548	0.233889	0.820604	-4.89671
ENSRNOG00000000818	Nrm	361791	0.0541995	8.42366	0.368352	0.717276	0.958105	-5.49129
ENSRNOG00000000825	Calhm5	294431	0.165883	7.81652	1.07522	0.29769	0.856126	-5.04974
ENSRNOG00000000826	Flot1	64665	0.0932533	14.1416	1.26333	0.223963	0.817197	-4.86835
ENSRNOG00000000827	Ier3	294235	0.094002	10.6515	0.398397	0.695425	0.956152	-5.48098
ENSRNOG00000000831	Gtf2h4	294236	-0.0646587	11.8936	-0.863881	0.39999	0.89182	-5.22346
ENSRNOG00000000833	Vars2	309596	0.0399085	9.98028	0.464986	0.647995	0.949057	-5.45533
ENSRNOG00000000838	Lta	25008	-0.339062	7.35904	-2.24656	0.0386175	0.655822	-3.60245
ENSRNOG00000000839	Nfkbil1	361794	0.115164	11.208	0.976478	0.342874	0.874493	-5.13503
ENSRNOG00000000840	Atp6v1g2	368044	-0.0811484	15.3249	-1.01232	0.325943	0.86998	-5.10488
ENSRNOG00000000841	Ddx39b	114612	0.0227467	13.8172	0.256667	0.800596	0.969298	-5.52262
ENSRNOG00000000842	Ddah2	294239	0.0901262	13.1702	0.96045	0.35064	0.877645	-5.1482
ENSRNOG00000000843	Ly6g6c	294241	-0.110242	8.73633	-0.795329	0.437671	0.904493	-5.27251
ENSRNOG00000000844	Ly6g6d	415062	-0.143879	7.1579	-0.827185	0.419889	0.899703	-5.25017
ENSRNOG00000000846	Ly6g5c	294245	0.106691	7.12101	0.451997	0.657133	0.949951	-5.46063
ENSRNOG00000000847	Csnk2b	81650	0.0512671	15.1406	0.711663	0.486576	0.91581	-5.32733
ENSRNOG00000000848	Gpank1	415064	0.00488079	12.5884	0.0622279	0.951126	0.992177	-5.55058
ENSRNOG00000000850	Apom	55939	0.0543469	8.71859	0.250698	0.805131	0.96943	-5.52399
ENSRNOG00000000851	Bag6	94342	0.0553783	14.2017	0.748383	0.464723	0.910532	-5.30397
ENSRNOG00000000852	Prrc2a	294250	0.0823431	14.2829	0.64666	0.526711	0.924096	-5.366
ENSRNOG00000000853	Aif1	29427	0.256409	11.4393	1.21934	0.239792	0.823174	-4.9129
ENSRNOG00000000854	Ncr3	294251	-0.0903848	7.0162	-0.42629	0.675385	0.951969	-5.4707
ENSRNOG00000000855	Lst1	64569	-0.172747	8.13991	-1.12099	0.278282	0.836408	-5.00783
ENSRNOG00000000857	Msh5	294252	-0.225288	7.03527	-1.35869	0.19246	0.795427	-4.76751
ENSRNOG00000000858	Sapcd1	406170	-0.14471	8.75368	-1.52353	0.146488	0.771195	-4.5802
ENSRNOG00000000860	Vwa7	309611	0.108419	6.4311	0.930162	0.365645	0.881996	-5.17256
ENSRNOG00000000866	Rbmx	302855	-0.0532029	12.3629	-0.497751	0.625203	0.945767	-5.44129
ENSRNOG00000000869	Arhgef6	363509	-0.240959	10.401	-2.05966	0.0555047	0.669061	-3.87534
ENSRNOG00000000871	Cd40lg	84349	-0.00782359	6.49452	-0.0488017	0.961661	0.992577	-5.55126
ENSRNOG00000000873	Brs3	260319	0.293227	7.18155	1.16791	0.259378	0.828757	-4.96336
ENSRNOG00000000875	Fhl1	25177	-0.183943	12.7496	-1.52786	0.145416	0.769256	-4.57508
ENSRNOG00000000878	Slc44a4	294255	0.244077	8.6406	0.480233	0.637342	0.947139	-5.44891
ENSRNOG00000000886	Caln1	363909	-0.174654	14.3037	-2.37442	0.0299575	0.642877	-3.40966
ENSRNOG00000000888	Sbds	288615	-0.0302896	14.3434	-0.463178	0.649264	0.949604	-5.45607
ENSRNOG00000000893	Tmem248	288616	-0.0541116	14.3178	-0.633943	0.534775	0.924666	-5.37316
ENSRNOG00000000897	Rxfp2	363866	-0.0913213	8.11441	-0.481781	0.636265	0.947129	-5.44825
ENSRNOG00000000900	Tpst1	288617	-0.230072	12.8228	-3.46725	0.0030414	0.42837	-1.65286
ENSRNOG00000000901	Crcp	114205	-0.0253896	12.8956	-0.350032	0.730726	0.960944	-5.49718
ENSRNOG00000000902	Hsph1	288444	-0.0700456	15.0494	-1.06626	0.301602	0.856126	-5.05777
ENSRNOG00000000903	Asl	59085	-0.0255676	11.2311	-0.244358	0.809955	0.969648	-5.5254
ENSRNOG00000000907	Alox5ap	29624	0.260372	10.1934	1.05705	0.30566	0.860981	-5.06596
ENSRNOG00000000913	Gusb	24434	0.111455	9.96706	1.01736	0.323612	0.869901	-5.10057
ENSRNOG00000000920	Phkg1	29353	-0.197302	10.3402	-1.16138	0.26195	0.830296	-4.96964
ENSRNOG00000000921	Ubl3	363869	-0.0863566	15.1067	-1.17245	0.257604	0.828609	-4.95898
ENSRNOG00000000922	Sumf2	360800	-0.00794513	11.4162	-0.0852125	0.933114	0.988917	-5.54905
ENSRNOG00000000923	Cct6a	288620	-0.0262695	13.7867	-0.320176	0.752839	0.963675	-5.50616
ENSRNOG00000000924	Slc7a1	25648	-0.0176164	11.0223	-0.114277	0.910392	0.986205	-5.54643
ENSRNOG00000000925	Psph	304429	0.0340398	11.5933	0.512539	0.61504	0.942748	-5.43466
ENSRNOG00000000931	Sfswap	304431	0.109319	12.6712	1.24859	0.229174	0.818992	-4.88342
ENSRNOG00000000936	Stx2	25130	-0.00261123	11.0401	-0.0185675	0.985408	0.997241	-5.55218
ENSRNOG00000000937	Slc46a3	288454	-0.0431131	11.2636	-0.279805	0.783091	0.965439	-5.51704
ENSRNOG00000000938	Ran	84509	-0.112742	14.4062	-1.55526	0.138782	0.763516	-4.54238
ENSRNOG00000000940	Flt1	54251	-0.153208	12.9608	-0.994031	0.334507	0.86998	-5.12038
ENSRNOG00000000954	Polr1d	360762	-0.0512669	13.7954	-0.616286	0.546083	0.926162	-5.38288
ENSRNOG00000000956	Rasl11a	304268	0.360232	9.69761	1.21494	0.241424	0.824598	-4.91729
ENSRNOG00000000957	Rpl21	79449	0.00418143	14.5097	0.053774	0.957758	0.992577	-5.55103
ENSRNOG00000000962	Slc15a4	246280	-0.0346095	10.861	-0.487179	0.632516	0.947129	-5.44592
ENSRNOG00000000967	Aacs	65984	0.143864	13.1239	1.23721	0.233261	0.820604	-4.89496
ENSRNOG00000000969	Cyp3a18	252931	0.259194	6.07413	1.23359	0.234575	0.820604	-4.89861
ENSRNOG00000000979	Bri3bp	498176	0.121992	11.1606	1.25036	0.228543	0.818975	-4.88162
ENSRNOG00000000981	Scarb1	25073	-0.00457077	13.3881	-0.0602211	0.9527	0.992177	-5.55069
ENSRNOG00000000983	Zfp394	252860	-0.0888423	11.6026	-0.811521	0.428574	0.903598	-5.26126
ENSRNOG00000000985	Cpsf4	304277	-0.0288456	12.8406	-0.323071	0.750684	0.963675	-5.50532
ENSRNOG00000000988	Xab2	245976	0.133462	12.1786	1.07633	0.297208	0.856126	-5.04874
ENSRNOG00000000989	Bud31	89819	0.118092	13.3195	1.23527	0.233962	0.820604	-4.89691
ENSRNOG00000000990	Pdap1	64527	0.105906	14.1882	1.24227	0.231437	0.820604	-4.88984
ENSRNOG00000000991	Arpc1b	54227	0.177467	11.6575	1.09459	0.289357	0.848063	-5.03218
ENSRNOG00000000994	Stxbp2	81804	0.0399501	9.82889	0.294068	0.772359	0.965049	-5.51336
ENSRNOG00000000996	Arpc1a	81824	0.0144555	14.2164	0.175461	0.862844	0.979123	-5.53843
ENSRNOG00000001001	Retn	246250	0.0631597	6.28534	0.314997	0.756698	0.963675	-5.50764
ENSRNOG00000001005	Fcer2	171075	-0.128005	7.39154	-1.06646	0.301514	0.856126	-5.05759
ENSRNOG00000001006	Nptx2	288475	0.233432	12.7677	1.11695	0.279955	0.837056	-5.01159
ENSRNOG00000001007	Baiap2l1	304282	0.522146	7.74703	1.57411	0.134366	0.760969	-4.51964
ENSRNOG00000001009	Bri3	304284	0.00938691	14.5029	0.0850132	0.93327	0.988917	-5.54907
ENSRNOG00000001010	Tecpr1	304285	0.321846	12.9924	3.40832	0.00345064	0.42837	-1.74956
ENSRNOG00000001031	Ocm2	25503	-0.215741	8.76149	-0.439671	0.665858	0.951969	-5.46553
ENSRNOG00000001032	Ccz1b	360768	-0.0690705	12.2852	-1.05245	0.307704	0.861896	-5.07003
ENSRNOG00000001033	Nufip1	364430	-0.00252864	11.1853	-0.0251794	0.980213	0.994841	-5.55205
ENSRNOG00000001035	Gtf2h3	288651	-0.0502334	10.7308	-0.556828	0.585091	0.934498	-5.41367
ENSRNOG00000001036	Rsph10b	288478	0.0737616	11.0704	0.243601	0.810531	0.969992	-5.52556
ENSRNOG00000001037	Gpalpp1	298712	-0.178224	11.7554	-2.22798	0.0400546	0.655822	-3.63008
ENSRNOG00000001039	Eif2b1	64514	-0.108726	11.9293	-1.44072	0.1683	0.788033	-4.67629
ENSRNOG00000001044	Aimp2	288480	-0.0055358	13.2564	-0.0522033	0.958991	0.992577	-5.5511
ENSRNOG00000001047	Map2k7	363855	-0.0379138	13.6427	-0.357579	0.725174	0.96045	-5.49479
ENSRNOG00000001048	Ankrd61	689907	0.122969	7.69288	0.633651	0.534961	0.924666	-5.37332
ENSRNOG00000001049	Tpt1	116646	-0.00359401	15.3128	-0.0515769	0.959483	0.992577	-5.55113
ENSRNOG00000001050	Eif2ak1	27137	-0.0166454	12.7763	-0.246669	0.808196	0.96943	-5.52489
ENSRNOG00000001052	Slc25a30	361074	-0.0935675	10.6598	-0.816886	0.425587	0.900887	-5.25748
ENSRNOG00000001053	Tmed2	65165	-0.0256154	14.7855	-0.425116	0.676223	0.951969	-5.47115
ENSRNOG00000001056	Snapc2	304204	-0.0134915	13.9227	-0.131823	0.896712	0.985366	-5.54448
ENSRNOG00000001058	Timm44	29635	-0.0485947	11.8597	-0.625106	0.540418	0.924835	-5.37806
ENSRNOG00000001060	Snrnp35	360803	-0.0127095	12.6321	-0.180101	0.859258	0.978591	-5.53769
ENSRNOG00000001061	Rilpl2	288652	0.150593	13.1389	1.21558	0.241185	0.824598	-4.91665
ENSRNOG00000001065	Cyth3	116693	0.112483	12.2208	1.0102	0.32693	0.86998	-5.1067
ENSRNOG00000001068	Rac1	363875	-0.0429284	15.0552	-0.707616	0.489021	0.916089	-5.32984
ENSRNOG00000001080	Arl6ip4	288656	0.0193153	12.583	0.236028	0.816304	0.972045	-5.5272
ENSRNOG00000001082	Abcb9	63886	0.116802	12.0559	1.22882	0.236311	0.82062	-4.90341
ENSRNOG00000001083	Kdelr2	304290	0.0322223	12.7778	0.454493	0.655373	0.949807	-5.45962
ENSRNOG00000001088	Rfc3	288414	-0.118413	11.2833	-1.45523	0.164294	0.788033	-4.65973
ENSRNOG00000001092	Kl	83504	0.416543	7.47938	0.571286	0.575475	0.932897	-5.40645
ENSRNOG00000001108	N4bp2l2	288416	-0.205844	12.1554	-2.36155	0.0307389	0.642877	-3.42926
ENSRNOG00000001111	Brca2	360254	-0.0478924	10.2009	-0.514769	0.613514	0.942323	-5.43364
ENSRNOG00000001113	Mmd2	304301	0.020242	14.6183	0.194362	0.848256	0.978066	-5.53528
ENSRNOG00000001114	Wipi2	288498	-0.169653	12.9493	-1.83203	0.084988	0.71501	-4.19046
ENSRNOG00000001130	Nos1	24598	-0.193309	8.03866	-0.930372	0.36554	0.881996	-5.1724
ENSRNOG00000001135	Wsb2	288692	0.0496954	15.0865	0.875528	0.393805	0.887716	-5.21476
ENSRNOG00000001136	Pebp1	29542	0.0647791	14.7377	0.918425	0.371577	0.882599	-5.18182
ENSRNOG00000001138	Taok3	304530	0.0902195	13.6661	1.16603	0.260117	0.828757	-4.96517
ENSRNOG00000001142	Prkab1	83803	-0.0592313	11.9387	-0.758443	0.458842	0.909369	-5.29738
ENSRNOG00000001143	Cit	83620	-0.21095	13.0575	-1.26932	0.22187	0.817197	-4.86218
ENSRNOG00000001148	Rplp0	64205	0.106175	15.0717	1.24494	0.230478	0.820604	-4.88713
ENSRNOG00000001149	Pxn	360820	0.255418	12.2333	2.50718	0.0229152	0.611843	-3.20507
ENSRNOG00000001152	Glp1r	25051	-0.310758	6.76571	-2.43105	0.0267348	0.632623	-3.32289
ENSRNOG00000001153	Pla2g1b	29526	-0.0813739	10.0259	-0.532763	0.601272	0.939357	-5.42528
ENSRNOG00000001156	Msi1	259272	-0.0719062	12.4572	-0.359764	0.72357	0.959993	-5.49409
ENSRNOG00000001158	Abcg1	85264	-0.0977793	13.1449	-1.06824	0.300733	0.856126	-5.05599
ENSRNOG00000001159	Tff3	25563	-0.371594	6.85625	-1.2451	0.230423	0.820604	-4.88697
ENSRNOG00000001162	Tff2	116592	-0.0290997	7.50928	-0.184106	0.856165	0.97849	-5.53703
ENSRNOG00000001163	Srsf9	288701	-0.0224842	11.9886	-0.193592	0.848849	0.978066	-5.53541
ENSRNOG00000001164	Tff1	117270	0.201184	6.87014	1.20837	0.243873	0.825063	-4.92381
ENSRNOG00000001169	Slc37a1	294321	-0.136525	11.4512	-1.3623	0.191341	0.795427	-4.76358
ENSRNOG00000001170	Cox6a1	25282	0.00198326	15.4262	0.033541	0.973644	0.994841	-5.55182
ENSRNOG00000001171	Coq5	304542	-0.0167456	11.1569	-0.247819	0.80732	0.96943	-5.52463
ENSRNOG00000001172	Rnf10	288710	0.062285	14.5078	0.819167	0.424321	0.899893	-5.25587
ENSRNOG00000001173	Cabp1	171051	0.221062	14.6522	1.43752	0.169192	0.788033	-4.67992
ENSRNOG00000001174	Pde9a	191569	-0.0718857	12.2957	-0.603935	0.554068	0.927471	-5.38952
ENSRNOG00000001177	Acads	64304	0.33783	7.74464	3.01033	0.00805433	0.48895	-2.40123
ENSRNOG00000001182	Ndufv3	64539	-0.058692	12.8428	-0.751053	0.463158	0.909369	-5.30223
ENSRNOG00000001183	Hnf1a	24817	-0.0652325	8.08718	-0.373526	0.713495	0.956934	-5.48957
ENSRNOG00000001184	Pknox1	294322	-0.20969	10.1784	-2.30787	0.0342086	0.651599	-3.51056
ENSRNOG00000001185	RGD1311899	288704	0.0910623	13.6834	1.31303	0.207071	0.804108	-4.8165
ENSRNOG00000001187	Oasl	304545	0.139484	7.06542	0.728973	0.4762	0.912022	-5.31646
ENSRNOG00000001189	Sik1	59329	0.532136	11.6245	1.95926	0.067134	0.673727	-4.01689
ENSRNOG00000001190	Git2	304546	-0.00836391	13.2685	-0.100593	0.921081	0.987193	-5.54776
ENSRNOG00000001195	Trpv4	66026	0.63571	7.12525	1.5474	0.140658	0.766122	-4.5518
ENSRNOG00000001201	Cstb	25308	0.049847	12.1563	0.737607	0.471074	0.91081	-5.31094
ENSRNOG00000001203	Rrp1	309674	-0.0503562	12.7391	-0.832198	0.417134	0.899574	-5.24659
ENSRNOG00000001204	Ankrd13a	360823	0.00450048	13.1061	0.043859	0.965541	0.993229	-5.55146
ENSRNOG00000001211	Gatd3a	294326	0.104809	13.1326	1.20638	0.244618	0.825063	-4.92578
ENSRNOG00000001212	Dnmt3l	309680	-0.129866	7.18029	-1.07091	0.299564	0.856126	-5.0536
ENSRNOG00000001214	Pfkl	25741	0.00185285	14.3213	0.018399	0.98554	0.997241	-5.55218
ENSRNOG00000001215	Cfap410	309681	0.0391473	12.4966	0.487118	0.632558	0.947129	-5.44595
ENSRNOG00000001216	Trpm2	294329	-0.0951578	11.9974	-1.29422	0.213343	0.806236	-4.83632
ENSRNOG00000001217	Lrrc3	246773	-0.191466	6.09424	-0.958167	0.351755	0.877645	-5.15006
ENSRNOG00000001223	Pttg1ip	365548	0.149405	12.0104	1.36302	0.191117	0.795427	-4.76279
ENSRNOG00000001225	Fam207a	294333	0.0935347	11.3506	0.971001	0.345514	0.874493	-5.13955
ENSRNOG00000001227	Adarb1	25367	0.254309	13.5606	2.08513	0.0528611	0.669061	-3.83884
ENSRNOG00000001232	Slc19a1	29723	0.363958	11.0017	2.33122	0.0326565	0.651599	-3.47529
ENSRNOG00000001235	Gna12	81663	0.149418	13.6892	1.50463	0.151246	0.77566	-4.60247
ENSRNOG00000001237	Cabin1	94165	-0.054941	13.3505	-0.393933	0.698655	0.956152	-5.48256
ENSRNOG00000001238	Rsrc2	360807	-0.0049559	13.0465	-0.0753292	0.940855	0.989986	-5.54977
ENSRNOG00000001239	Ddt	29318	0.173043	13.906	1.87824	0.0780661	0.698295	-4.1282
ENSRNOG00000001245	Pcbp3	294336	-0.00606295	14.1005	-0.0767375	0.939752	0.989802	-5.54967
ENSRNOG00000001247	Clip1	65201	-0.0537643	13.3303	-0.839772	0.412993	0.897842	-5.24113
ENSRNOG00000001250	Lfng	170905	0.2328	11.7089	1.41353	0.176018	0.790431	-4.70697
ENSRNOG00000001251	Grifin	117130	0.18317	9.68527	0.476906	0.63966	0.947341	-5.45033
ENSRNOG00000001252	Chst12	304322	-0.0842218	11.389	-0.841146	0.412245	0.897842	-5.24013
ENSRNOG00000001253	Eif3b	288516	-0.0290089	13.9348	-0.468846	0.645291	0.948484	-5.45372
ENSRNOG00000001260	Nudt1	117260	-0.0539994	10.5072	-0.539075	0.597007	0.93887	-5.42228
ENSRNOG00000001261	Ftcd	89833	-0.0484761	8.17095	-0.211124	0.835366	0.977259	-5.53222
ENSRNOG00000001269	Ppp1cc	24669	-0.0798439	14.7171	-0.69555	0.496354	0.917506	-5.33724
ENSRNOG00000001275	Tmem184a	304325	0.139354	6.66579	0.585165	0.566324	0.931057	-5.39936
ENSRNOG00000001277	Mafk	246760	0.00550691	11.5566	0.0687931	0.945978	0.991415	-5.55019
ENSRNOG00000001278	Gpn3	360810	-0.238646	12.2017	-3.00942	0.00806982	0.48895	-2.40271
ENSRNOG00000001284	Uncx	29375	-0.203452	6.34621	-1.19503	0.248906	0.827834	-4.93698
ENSRNOG00000001287	Gper1	171104	-0.0228846	9.28145	-0.117062	0.908218	0.986205	-5.54614
ENSRNOG00000001289	LOC498154	498154	0.0922292	11.7338	0.648437	0.52559	0.923857	-5.36499
ENSRNOG00000001294	Ift81	373066	-0.0750974	12.5413	-0.916373	0.37262	0.883065	-5.18343
ENSRNOG00000001295	S100b	25742	0.0237853	15.0964	0.409187	0.687644	0.953917	-5.47709
ENSRNOG00000001296	P2rx7	29665	0.024408	9.93369	0.133103	0.895715	0.985111	-5.54433
ENSRNOG00000001297	Prmt2	499420	-0.209642	12.9217	-2.03109	0.0586125	0.669061	-3.916
ENSRNOG00000001299	Sun1	360773	0.0503017	13.1811	0.392097	0.699985	0.956152	-5.48321
ENSRNOG00000001300	P2rx4	29659	0.0782962	12.9984	0.546569	0.591961	0.937928	-5.41868
ENSRNOG00000001302	Adora2a	25369	-1.29459	14.3594	-1.89553	0.0756085	0.696526	-4.10468
ENSRNOG00000001303	Specc1l	361828	-0.107448	12.6012	-1.42849	0.171735	0.788895	-4.69014
ENSRNOG00000001309	Camkk2	83506	0.115171	12.781	0.734755	0.472763	0.91081	-5.31277
ENSRNOG00000001312	Pdgfa	25266	0.172508	11.9054	1.46284	0.162226	0.787658	-4.651
ENSRNOG00000001313	Gnaz	25740	0.000732672	13.2064	0.00813939	0.993603	0.999313	-5.5523
ENSRNOG00000001314	Fam20c	304334	0.00332292	12.9248	0.035461	0.972136	0.994841	-5.55177
ENSRNOG00000001316	Anapc5	288671	0.00342273	14.6098	0.0704144	0.944707	0.991415	-5.55009
ENSRNOG00000001325	Il3ra	246144	0.0939362	9.83545	0.615613	0.546516	0.926197	-5.38324
ENSRNOG00000001331	Rnf34	282845	-0.151546	13.328	-2.1203	0.0493997	0.663657	-3.78806
ENSRNOG00000001333	Azgp1	25294	-0.492801	6.28838	-3.33095	0.00407198	0.444994	-1.87657
ENSRNOG00000001335	Zkscan1	498160	-0.101299	12.1099	-1.36169	0.191528	0.795427	-4.76424
ENSRNOG00000001336	Orai1	304496	0.320692	10.1784	1.41645	0.175176	0.79005	-4.7037
ENSRNOG00000001338	Hpd	29531	-0.0676613	9.15402	-0.355954	0.726368	0.96089	-5.49531
ENSRNOG00000001339	Psmd9	161475	0.00612481	12.8485	0.0803098	0.936953	0.989369	-5.54942
ENSRNOG00000001344	Aldh2	29539	-0.0693924	13.7872	-0.888567	0.386957	0.887428	-5.20489
ENSRNOG00000001345	Mapkapk5	498183	-0.0708003	13.9716	-0.962707	0.349539	0.876737	-5.14636
ENSRNOG00000001347	Adam1a	56777	0.151147	10.7302	0.957603	0.352032	0.877645	-5.15052
ENSRNOG00000001348	Erp29	117030	0.0755218	12.6133	0.734322	0.47302	0.91081	-5.31304
ENSRNOG00000001349	Mcm7	288532	-0.136103	11.6848	-1.12876	0.275083	0.836408	-5.00057
ENSRNOG00000001350	Naa25	360811	-0.0751059	12.0742	-1.0363	0.314954	0.863274	-5.0842
ENSRNOG00000001353	Ap4m1	304344	-0.019524	10.3624	-0.222173	0.826895	0.974405	-5.53006
ENSRNOG00000001355	Taf6	288533	-0.0516467	12.667	-0.665503	0.51489	0.921432	-5.35515
ENSRNOG00000001357	Mblac1	304346	-0.040776	9.29921	-0.366619	0.718544	0.958105	-5.49186
ENSRNOG00000001360	Stag3	114522	0.000903902	7.30016	0.00528426	0.995847	0.999313	-5.55232
ENSRNOG00000001367	Gpc2	171517	0.264933	8.26459	1.18289	0.253552	0.828093	-4.94885
ENSRNOG00000001368	Rph3a	171039	0.1091	14.9223	0.990401	0.336225	0.86998	-5.12343
ENSRNOG00000001369	Oas1a	192281	0.323888	9.30483	1.68485	0.110762	0.73597	-4.38231
ENSRNOG00000001376	Mettl7a	315306	0.114693	13.1974	0.957498	0.352083	0.877645	-5.1506
ENSRNOG00000001379	Cyp3a62	170509	0.109105	7.60605	0.385729	0.704606	0.956152	-5.48542
ENSRNOG00000001383	Slc8b1	498185	-0.0367378	10.6794	-0.283592	0.780237	0.965305	-5.51608
ENSRNOG00000001385	Plbd2	246120	0.139216	13.4523	2.00557	0.0615203	0.669061	-3.95206
ENSRNOG00000001388	Sds	25044	-0.0200791	8.48171	-0.117243	0.908077	0.986205	-5.54612
ENSRNOG00000001389	Irs3	84021	-0.186502	8.4626	-1.50313	0.151629	0.775809	-4.60423
ENSRNOG00000001392	Lhx5	124451	-0.399175	7.33211	-1.51511	0.148594	0.773273	-4.59016
ENSRNOG00000001396	Mospd3	288557	-0.0884414	12.6725	-0.905036	0.378422	0.884171	-5.19225
ENSRNOG00000001399	Tbx5	304514	-0.114573	6.51179	-0.923232	0.369139	0.882511	-5.17804
ENSRNOG00000001409	Gnb2	81667	-0.0176973	15.3689	-0.285916	0.778487	0.965305	-5.51549
ENSRNOG00000001412	Epo	24335	-0.0496696	6.28337	-0.619122	0.544257	0.925878	-5.38133
ENSRNOG00000001414	Serpine1	24617	-0.150107	8.98448	-0.976354	0.342933	0.874493	-5.13513
ENSRNOG00000001416	Vgf	29461	0.107715	12.7397	0.272784	0.78839	0.966789	-5.51878
ENSRNOG00000001417	Plod3	288583	-0.0494686	13.6786	-0.406808	0.689357	0.954725	-5.47795
ENSRNOG00000001425	Sh2b2	114203	0.292683	9.57419	1.65138	0.11749	0.741641	-4.42448
ENSRNOG00000001429	Lrwd1	304396	-0.0858829	11.2219	-1.27899	0.218529	0.812591	-4.85219
ENSRNOG00000001434	Zp3	114639	-0.176378	6.09474	-1.32482	0.203216	0.802879	-4.80398
ENSRNOG00000001436	Ywhag	56010	0.0328829	15.5017	0.457546	0.653223	0.949604	-5.45838
ENSRNOG00000001440	Mdh2	81829	0.0269102	15.1243	0.334962	0.741858	0.962982	-5.50181
ENSRNOG00000001441	Tmem120a	288591	0.0188662	12.4871	0.218715	0.829544	0.975446	-5.53075
ENSRNOG00000001442	Por	29441	-0.0289491	14.5169	-0.392141	0.699953	0.956152	-5.48319
ENSRNOG00000001449	Pom121	113975	-0.077806	13.9389	-1.1216	0.278029	0.836408	-5.00726
ENSRNOG00000001452	Fzd9	266608	0.207709	11.734	2.22769	0.0400769	0.655822	-3.6305
ENSRNOG00000001454	Eif4h	288599	0.0667289	14.1091	1.26665	0.222803	0.817197	-4.86494
ENSRNOG00000001457	Rfc2	116468	-0.0596403	12.5727	-0.900103	0.380965	0.884972	-5.19606
ENSRNOG00000001469	Eln	25043	-0.197363	10.7386	-1.26722	0.222602	0.817197	-4.86435
ENSRNOG00000001470	Limk1	65172	0.290184	12.767	1.49635	0.153372	0.778816	-4.61217
ENSRNOG00000001476	Cldn4	304407	0.0687533	8.10971	0.455273	0.654824	0.949807	-5.45931
ENSRNOG00000001478	Gtf2ird1	246770	-0.16471	12.351	-1.15098	0.266085	0.833828	-4.97958
ENSRNOG00000001479	Gtf2i	353256	0.0681307	13.7718	1.09348	0.28983	0.848404	-5.03319
ENSRNOG00000001480	Ncf1	114553	-0.11623	10.05	-0.48319	0.635285	0.947129	-5.44764
ENSRNOG00000001488	Psmb1	94198	0.0772709	13.4876	0.976289	0.342964	0.874493	-5.13518
ENSRNOG00000001489	Tbp	117526	-0.166979	12.3012	-2.53206	0.0217834	0.606814	-3.1663
ENSRNOG00000001492	Slc8a2	140447	0.31333	10.7779	2.0281	0.0589469	0.669061	-3.92024
ENSRNOG00000001494	Napa	140673	0.0718431	14.5607	1.00574	0.329008	0.86998	-5.11049
ENSRNOG00000001499	Mia	81510	0.0792516	7.5153	0.519884	0.610022	0.941584	-5.43129
ENSRNOG00000001500	Rab4b	50866	0.149328	12.0608	1.36424	0.190741	0.795427	-4.76146
ENSRNOG00000001501	Snrpa	292729	-0.0810757	10.6917	-0.921322	0.370107	0.882511	-5.17954
ENSRNOG00000001506	Tmem35a	308134	-0.0466055	13.2968	-0.521235	0.609102	0.941529	-5.43067
ENSRNOG00000001514	Cdca7	311742	-0.0723767	10.2245	-0.252448	0.8038	0.969305	-5.52359
ENSRNOG00000001517	Pdk1	116551	0.0399092	12.6117	0.382485	0.706965	0.956152	-5.48654
ENSRNOG00000001524	Hat1	296501	-0.143626	11.0852	-1.99064	0.0632824	0.669061	-3.97306
ENSRNOG00000001525	Igsf11	303926	-0.175229	13.7062	-2.39827	0.0285581	0.639004	-3.37321
ENSRNOG00000001527	Cd80	25408	-0.0842879	8.16041	-0.507073	0.618787	0.943172	-5.43713
ENSRNOG00000001528	Gap43	29423	-0.0743005	14.7116	-0.806292	0.431498	0.904493	-5.26492
ENSRNOG00000001531	Chac2	360994	-0.0814967	9.75703	-0.893859	0.3842	0.887093	-5.20085
ENSRNOG00000001544	Cyyr1	304138	-0.0803217	13.4392	-0.490059	0.63052	0.947129	-5.44467
ENSRNOG00000001547	Agps	84114	-0.174322	10.715	-1.48033	0.157554	0.78676	-4.63082
ENSRNOG00000001548	Nfe2l2	83619	0.0775118	12.4755	0.762269	0.456617	0.909369	-5.29485
ENSRNOG00000001551	Atp5pf	94271	0.0943644	13.747	1.46731	0.161021	0.786967	-4.64586
ENSRNOG00000001555	Btg3	54230	-0.20895	11.6554	-2.04348	0.0572462	0.669061	-3.89841
ENSRNOG00000001557	Cxadr	89843	0.116394	10.0174	0.545575	0.59263	0.937989	-5.41916
ENSRNOG00000001559	Mtx2	288150	-0.125364	12.3899	-1.08468	0.293597	0.852183	-5.04119
ENSRNOG00000001571	Cldn8	304124	-0.176975	7.49686	-0.823415	0.421969	0.899893	-5.25286
ENSRNOG00000001575	Grik1	29559	-0.0198789	11.712	-0.181111	0.858478	0.978591	-5.53752
ENSRNOG00000001584	Map3k7cl	304131	-0.184794	10.3968	-1.36947	0.189133	0.795427	-4.75575
ENSRNOG00000001593	Lnpk	362151	-0.118091	12.135	-1.64547	0.118712	0.742029	-4.43186
ENSRNOG00000001597	Atf2	81647	-0.0920732	14.6907	-1.19298	0.249685	0.827834	-4.93899
ENSRNOG00000001607	Adamts1	79252	0.0814779	10.924	0.384527	0.705479	0.956152	-5.48584
ENSRNOG00000001611	Rpl24	64307	0.154025	14.1178	1.66178	0.115362	0.740425	-4.41143
ENSRNOG00000001621	C2cd2	304055	-0.0486458	9.99519	-0.4624	0.64981	0.949604	-5.45639
ENSRNOG00000001622	Impg2	245919	0.287487	6.89816	1.54787	0.140546	0.766122	-4.55124
ENSRNOG00000001628	Pcp4	25510	-0.0501806	15.151	-0.457192	0.653472	0.949604	-5.45853
ENSRNOG00000001629	Wrb	288233	-0.100522	13.5963	-1.32571	0.20293	0.802879	-4.80303
ENSRNOG00000001633	Tfg	360709	-0.131228	13.414	-1.56551	0.136366	0.761572	-4.53004
ENSRNOG00000001640	Tomm70	304017	-0.396416	13.8056	-2.42021	0.0273253	0.632623	-3.33956
ENSRNOG00000001652	Erg	170909	-0.0496121	10.9482	-0.316916	0.755266	0.963675	-5.50709
ENSRNOG00000001653	St3gal6	304023	0.0169233	11.3448	0.138962	0.891156	0.983706	-5.54361
ENSRNOG00000001654	Cpox	304024	-0.114972	13.2913	-1.22543	0.237551	0.82062	-4.90681
ENSRNOG00000001656	Kcnj15	170847	0.225404	7.70664	1.15646	0.2639	0.832671	-4.97435
ENSRNOG00000001657	Cldnd1	288182	-0.0838147	13.8899	-1.3384	0.198849	0.800772	-4.78945
ENSRNOG00000001662	Dyrk1a	25255	-0.145686	13.6409	-1.83527	0.0844863	0.713939	-4.18614
ENSRNOG00000001679	Gabrr3	192258	0.116069	6.47128	0.515742	0.61285	0.942323	-5.4332
ENSRNOG00000001691	Cldn14	304073	-0.0899517	9.02682	-0.440026	0.665606	0.951969	-5.46539
ENSRNOG00000001692	Chaf1b	288242	0.00697598	6.9572	0.0527844	0.958535	0.992577	-5.55107
ENSRNOG00000001700	Whrn	313255	0.152039	13.6721	1.94825	0.068534	0.675655	-4.03217
ENSRNOG00000001704	Runx1	50662	0.242226	11.7249	0.806097	0.431608	0.904493	-5.26505
ENSRNOG00000001706	Kalrn	84009	-0.0559412	13.0296	-0.44989	0.658621	0.950489	-5.46148
ENSRNOG00000001709	Ap2m1	116563	0.0310563	15.2432	0.662755	0.516604	0.922321	-5.35675
ENSRNOG00000001710	Abcf3	287982	0.0563075	14.0899	0.992872	0.335055	0.86998	-5.12136
ENSRNOG00000001715	Ece2	408243	-0.4579	11.5689	-2.24577	0.0386773	0.655822	-3.60362
ENSRNOG00000001717	Opa1	171116	-0.0423825	13.7376	-0.632491	0.5357	0.924666	-5.37397
ENSRNOG00000001719	Psmd2	287984	-0.0332989	14.647	-0.527316	0.604965	0.941173	-5.42784
ENSRNOG00000001720	Hes1	29577	0.365479	11.5399	1.88581	0.0769818	0.698295	-4.11792
ENSRNOG00000001727	Lsg1	288029	-0.105935	13.2126	-1.5234	0.146521	0.771195	-4.58036
ENSRNOG00000001728	LOC100909474	288031	0.349377	9.86596	1.68654	0.110432	0.73597	-4.38017
ENSRNOG00000001730	Acap2	619382	-0.136794	11.8356	-1.28168	0.217604	0.81208	-4.84939
ENSRNOG00000001733	Ppp1r2	192361	-0.380474	13.7433	-3.11108	0.00650618	0.48895	-2.23687
ENSRNOG00000001736	Bdh1	117099	-0.0201844	12.7404	-0.232353	0.81911	0.972579	-5.52798
ENSRNOG00000001742	LOC108348101	29232	0.179894	12.5725	2.86318	0.0109788	0.516961	-2.6398
ENSRNOG00000001752	Nrros	303875	0.105978	10.796	0.704815	0.490718	0.916089	-5.33157
ENSRNOG00000001762	Pcyt1a	140544	0.10042	10.813	1.19084	0.250501	0.828093	-4.94108
ENSRNOG00000001769	Tnk2	303882	0.115845	14.3812	1.25407	0.227224	0.817197	-4.87783
ENSRNOG00000001770	Ehhadh	171142	-0.156684	10.3552	-2.01365	0.0605856	0.669061	-3.94067
ENSRNOG00000001773	Senp2	78973	-0.155297	13.8828	-2.57494	0.0199563	0.606814	-3.09917
ENSRNOG00000001783	Tra2b	117259	-0.0648156	13.9882	-1.02638	0.319468	0.867319	-5.09281
ENSRNOG00000001789	Zfp148	58820	0.139083	13.1357	2.30143	0.0346488	0.651599	-3.52026
ENSRNOG00000001792	Slc12a8	266733	-0.147072	7.14636	-1.17579	0.256302	0.828572	-4.95575
ENSRNOG00000001796	Dgkg	25666	-0.169811	11.7218	-0.621553	0.542696	0.925554	-5.38001
ENSRNOG00000001797	Umps	288051	-0.0318082	11.9919	-0.429074	0.673398	0.951969	-5.46964
ENSRNOG00000001803	Dnajb11	360734	-0.0844879	14.005	-1.16621	0.260046	0.828757	-4.965
ENSRNOG00000001804	Itpr2	81678	-0.0948413	11.9536	-0.587658	0.564688	0.930306	-5.39807
ENSRNOG00000001806	Fetub	83928	0.104823	7.13558	0.68257	0.504313	0.919184	-5.34507
ENSRNOG00000001809	Hrg	171016	0.0556862	6.74642	0.318359	0.754191	0.963675	-5.50668
ENSRNOG00000001811	Fgfr1op2	362463	0.0141714	12.5406	0.130978	0.89737	0.985366	-5.54458
ENSRNOG00000001813	Dnm1l	114114	-0.102067	13.7212	-1.06263	0.303195	0.857837	-5.061
ENSRNOG00000001815	Eif4a2	303831	-0.0214497	14.6142	-0.256074	0.801047	0.969305	-5.52276
ENSRNOG00000001817	Tm7sf3	297725	0.014249	13.339	0.248314	0.806944	0.96943	-5.52452
ENSRNOG00000001821	Adipoq	246253	0.249018	7.12363	0.690718	0.499308	0.917506	-5.34017
ENSRNOG00000001823	St6gal1	25197	0.0463612	11.2468	0.355971	0.726355	0.96089	-5.49531
ENSRNOG00000001827	Masp1	64023	0.0678274	13.6035	0.601448	0.555684	0.928173	-5.39084
ENSRNOG00000001828	Stk38l	691337	-0.0324456	12.5472	-0.340803	0.737536	0.962402	-5.50004
ENSRNOG00000001829	Ube2v2	287927	0.0372483	13.7222	0.399708	0.694479	0.956152	-5.48051
ENSRNOG00000001837	Sst	24797	-0.00177531	14.1456	-0.0105075	0.991742	0.998571	-5.55228
ENSRNOG00000001847	Ccdc91	312863	0.00542939	12.8953	0.0830517	0.934806	0.989369	-5.54922
ENSRNOG00000001849	Mapk1	116590	-0.208783	14.7121	-3.14901	0.00600241	0.48895	-2.17484
ENSRNOG00000001852	Ergic2	297728	-0.0114883	11.2623	-0.111013	0.91294	0.986205	-5.54677
ENSRNOG00000001860	Ccdc116	287936	0.0671172	7.70781	0.358334	0.724619	0.960278	-5.49455
ENSRNOG00000001861	Ydjc	287938	0.114239	10.6102	0.71883	0.482263	0.913613	-5.32286
ENSRNOG00000001865	Serpind1	79224	0.165473	6.34091	1.18276	0.253603	0.828093	-4.94898
ENSRNOG00000001867	Snap29	116500	0.0258861	11.1246	0.452038	0.657105	0.949951	-5.46062
ENSRNOG00000001873	P2rx6	25041	0.259683	9.90081	1.05685	0.305751	0.860981	-5.06614
ENSRNOG00000001885	Trmt2a	287953	-0.0567891	12.6304	-0.566064	0.578939	0.933513	-5.40908
ENSRNOG00000001889	Comt	24267	0.721122	12.1464	6.09436	1.3335e-05	0.127109	2.26971
ENSRNOG00000001890	Txnrd2	50551	0.175586	11.4122	1.84436	0.0830905	0.712125	-4.17395
ENSRNOG00000001924	Tp63	246334	0.000378213	6.91295	0.00315599	0.99752	0.999481	-5.55233
ENSRNOG00000001926	Cldn1	65129	0.933807	7.52282	2.41779	0.0274589	0.632623	-3.34328
ENSRNOG00000001928	Il1rap	25466	0.169092	12.139	1.31952	0.204944	0.803166	-4.80962
ENSRNOG00000001930	Ccdc50	288022	0.0289427	11.4358	0.343966	0.735199	0.961281	-5.49907
ENSRNOG00000001931	Fgf12	170630	-0.0393661	14.5719	-0.525554	0.606162	0.941173	-5.42866
ENSRNOG00000001942	Smr3b	24867	-0.0898805	5.94743	-0.426268	0.6754	0.951969	-5.47071
ENSRNOG00000001943	Retnlg	288135	0.0737916	6.78663	0.355206	0.726918	0.96089	-5.49555
ENSRNOG00000001945	Vcsa2	289526	-0.0896025	5.77372	-0.379789	0.708927	0.956152	-5.48746
ENSRNOG00000001949	Smr3a	498341	0.0456976	6.55525	0.286218	0.77826	0.965305	-5.51541
ENSRNOG00000001950	Cabs1	64029	-0.0298402	5.88145	-0.255542	0.801451	0.969305	-5.52288
ENSRNOG00000001951	Csn3	29188	0.264264	6.14596	1.5867	0.131483	0.756364	-4.50434
ENSRNOG00000001953	Bace2	288227	0.174139	10.3023	0.994276	0.334392	0.86998	-5.12018
ENSRNOG00000001955	Retnla	81712	0.174302	6.26684	1.51115	0.149591	0.773273	-4.59482
ENSRNOG00000001957	Sult1e1	360268	0.282289	6.606	1.67675	0.11236	0.73597	-4.39257
ENSRNOG00000001959	Mx1	24575	0.208438	7.10932	0.983175	0.339664	0.87175	-5.12947
ENSRNOG00000001960	Sult1d1	60393	-0.213201	10.4399	-1.02811	0.318676	0.867319	-5.09131
ENSRNOG00000001963	Mx2	286918	0.055631	11.7241	0.614632	0.547148	0.926197	-5.38377
ENSRNOG00000001964	Cd47	29364	-0.0525189	13.8971	-0.737841	0.470935	0.91081	-5.31079
ENSRNOG00000001967	Sult1b1	64305	0.0555876	5.64883	0.430886	0.672106	0.951969	-5.46895
ENSRNOG00000001971	Bbx	303970	-0.225276	12.9785	-2.28193	0.0360139	0.651599	-3.54958
ENSRNOG00000001973	Ugt2a3	63867	-0.0742965	6.65053	-0.477207	0.63945	0.947341	-5.4502
ENSRNOG00000001976	Tmprss2	156435	-0.0473701	6.30661	-0.206733	0.838738	0.978066	-5.53304
ENSRNOG00000001979	Rcan1	266766	-0.151725	13.4252	-2.29105	0.0353689	0.651599	-3.53587
ENSRNOG00000001980	Ugt2b35	83808	0.0378119	6.35346	0.249974	0.805681	0.96943	-5.52415
ENSRNOG00000001982	Cblb	171136	-0.0101686	11.8718	-0.0625318	0.950888	0.992177	-5.55057
ENSRNOG00000001984	Kcne1	25471	-0.279289	6.43271	-1.45329	0.164826	0.788033	-4.66196
ENSRNOG00000001986	Fam243a	498063	0.0500781	6.01603	0.294837	0.771781	0.965049	-5.51316
ENSRNOG00000001989	Alcam	79559	-0.2275	14.278	-2.88746	0.0104335	0.51168	-2.60057
ENSRNOG00000001990	Ugt2b17	286954	0.271027	6.23046	2.035	0.0581777	0.669061	-3.91045
ENSRNOG00000001991	Atp5po	192241	0.163293	13.2764	1.79147	0.0915044	0.72456	-4.24434
ENSRNOG00000001996	Ythdc1	170956	-0.205632	13.2042	-3.05506	0.00732696	0.48895	-2.32834
ENSRNOG00000002002	Tmprss11b	365265	-0.133153	5.88817	-1.09266	0.290178	0.848923	-5.03394
ENSRNOG00000002011	Gnrhr	81668	0.250942	6.19143	1.33911	0.198621	0.800772	-4.78868
ENSRNOG00000002012	Donson	288257	-0.217369	10.9868	-2.32343	0.0331671	0.651599	-3.48708
ENSRNOG00000002014	Stap1	305269	-0.00176858	6.13875	-0.0146558	0.988482	0.998109	-5.55224
ENSRNOG00000002026	Dnajc28	360699	-0.66048	9.41128	-2.41747	0.0274765	0.632623	-3.34377
ENSRNOG00000002028	Tmem50b	360698	0.049325	14.1285	0.744387	0.467072	0.91081	-5.30656
ENSRNOG00000002031	Naa11	289482	-0.0261629	9.26718	-0.114943	0.909872	0.986205	-5.54636
ENSRNOG00000002035	Paqr3	305203	-0.0790971	13.3874	-1.03086	0.317423	0.865524	-5.08892
ENSRNOG00000002042	Gfi1	24388	-0.0964632	8.28597	-0.448323	0.659729	0.951172	-5.46211
ENSRNOG00000002044	Gtpbp8	360714	-0.0447267	10.164	-0.415124	0.683378	0.953338	-5.4749
ENSRNOG00000002045	Anxa3	25291	0.108439	13.2234	0.637153	0.532733	0.924666	-5.37137
ENSRNOG00000002050	Igfbp7	289560	0.0660746	14.4681	0.724696	0.478751	0.913239	-5.31917
ENSRNOG00000002052	Ccdc80	64387	0.227377	10.8243	1.95386	0.0678167	0.675475	-4.02438
ENSRNOG00000002055	Noa1	289562	0.0365415	11.4276	0.358305	0.724641	0.960278	-5.49456
ENSRNOG00000002057	Slc10a6	289459	0.293231	9.42236	0.887861	0.387326	0.887428	-5.20543
ENSRNOG00000002074	Rest	83618	0.0976312	8.62744	0.704304	0.491027	0.916123	-5.33189
ENSRNOG00000002079	Mapk10	25272	0.0531343	14.2316	0.42771	0.674371	0.951969	-5.47016
ENSRNOG00000002085	Thegl	498350	-0.338035	9.46769	-2.99901	0.00824931	0.48895	-2.41966
ENSRNOG00000002093	Tgfbr3	29610	-0.0461505	10.0692	-0.307661	0.762175	0.963675	-5.50969
ENSRNOG00000002094	Atg3	171415	-0.0193931	12.9682	-0.246013	0.808695	0.96943	-5.52503
ENSRNOG00000002097	Rasl11b	305302	0.0773643	13.2518	0.350982	0.730026	0.960944	-5.49689
ENSRNOG00000002101	Paics	140946	-0.069702	13.466	-1.08712	0.292551	0.850892	-5.03898
ENSRNOG00000002104	Scaf4	245924	-0.186347	12.2942	-2.06058	0.0554069	0.669061	-3.87402
ENSRNOG00000002115	Sod1	24786	-0.00487615	15.1687	-0.0641719	0.949601	0.992177	-5.55047
ENSRNOG00000002117	Barhl2	65050	-0.151894	7.16991	-0.52454	0.606852	0.941173	-5.42914
ENSRNOG00000002120	Spata18	289586	-0.329933	7.17685	-0.865571	0.399088	0.891796	-5.2222
ENSRNOG00000002121	Lrrc8d	305131	0.0746626	12.9157	0.772734	0.450566	0.909036	-5.28787
ENSRNOG00000002122	Lrrc8c	289443	-0.217641	11.3358	-1.29442	0.213276	0.806236	-4.83611
ENSRNOG00000002126	Ncam2	288280	-0.096081	13.899	-1.10315	0.285731	0.84398	-5.02434
ENSRNOG00000002141	Cd200	24560	-0.171141	14.0865	-2.10137	0.0512362	0.669061	-3.81545
ENSRNOG00000002142	Cds1	81925	0.214192	13.7459	1.40401	0.178785	0.790701	-4.7176
ENSRNOG00000002144	Exoc1	305287	-0.114044	12.3274	-1.71735	0.10455	0.729826	-4.34082
ENSRNOG00000002149	Nkx6-1	65193	-0.243734	7.88131	-0.816074	0.426038	0.901041	-5.25806
ENSRNOG00000002154	Mepe	79110	-0.249031	9.33123	-1.15435	0.26474	0.832672	-4.97637
ENSRNOG00000002158	Ibsp	24477	0.194728	9.71085	0.739841	0.469753	0.91081	-5.3095
ENSRNOG00000002159	Gpat3	305166	-0.0123133	9.85275	-0.0620286	0.951282	0.992177	-5.55059
ENSRNOG00000002161	Tlr6	305353	0.0576324	8.13676	0.272875	0.788322	0.966789	-5.51876
ENSRNOG00000002164	Nmu	63887	-0.388068	7.16584	-1.6605	0.115623	0.740425	-4.41305
ENSRNOG00000002165	Abraxas1	289468	0.0980807	8.43335	0.776202	0.448572	0.909036	-5.28554
ENSRNOG00000002167	Dmp1	25312	0.0128614	7.90649	0.0494309	0.961167	0.992577	-5.55123
ENSRNOG00000002168	Dspp	25254	0.181783	7.99025	0.931027	0.365211	0.881996	-5.17188
ENSRNOG00000002175	Clock	60447	-0.17565	12.2299	-1.40461	0.178611	0.790701	-4.71694
ENSRNOG00000002186	Nudt9	305149	-0.00464229	13.7206	-0.0630295	0.950497	0.992177	-5.55054
ENSRNOG00000002187	Ropn1	288053	0.0307359	6.12837	0.129701	0.898365	0.985485	-5.54473
ENSRNOG00000002188	Hpse	64537	0.154099	8.40646	0.846657	0.409252	0.89624	-5.23613
ENSRNOG00000002191	LOC498368	498368	0.0775115	10.7683	0.707125	0.489318	0.916089	-5.33015
ENSRNOG00000002194	Coq2	498332	-0.301315	13.486	-1.55637	0.138519	0.763516	-4.54104
ENSRNOG00000002199	Tmem165	364137	-0.0277042	11.7457	-0.295946	0.770949	0.965049	-5.51286
ENSRNOG00000002205	Ociad1	289590	-0.0881062	15.1113	-1.44117	0.168174	0.788033	-4.67577
ENSRNOG00000002210	Hsd17b11	289456	0.090351	13.6286	0.94516	0.358161	0.880121	-5.16058
ENSRNOG00000002212	Hsd17b13	305150	0.59668	10.341	1.32573	0.202922	0.802879	-4.80301
ENSRNOG00000002216	Srd5a3	305291	-0.0649612	12.2132	-0.8135	0.427471	0.902762	-5.25987
ENSRNOG00000002218	Stbd1	305234	0.0120975	10.1805	0.0793751	0.937685	0.989504	-5.54949
ENSRNOG00000002225	Scarb2	117106	-0.136677	11.4993	-0.928445	0.366509	0.881996	-5.17392
ENSRNOG00000002227	Kit	64030	0.141686	11.3588	0.779792	0.446513	0.90801	-5.28312
ENSRNOG00000002229	Adcy5	64532	-0.512962	13.6637	-1.64542	0.118724	0.742029	-4.43193
ENSRNOG00000002240	Slc49a4	303902	-0.125629	13.3225	-1.26676	0.222765	0.817197	-4.86483
ENSRNOG00000002241	Hspbap1	171460	-0.193824	10.5297	-2.59388	0.0191962	0.606814	-3.06939
ENSRNOG00000002247	Nup54	53372	0.00986161	11.585	0.115304	0.90959	0.986205	-5.54633
ENSRNOG00000002251	Sec31a	93646	-0.00433292	14.3053	-0.0590455	0.953622	0.992526	-5.55076
ENSRNOG00000002253	Wdr5b	303907	-0.0759963	8.34693	-0.511152	0.61599	0.942777	-5.43529
ENSRNOG00000002254	Tmem33	59303	-0.105824	12.2424	-1.77122	0.0949203	0.7279	-4.27096
ENSRNOG00000002255	Fam162a	360721	0.112155	13.094	1.06782	0.300919	0.856126	-5.05637
ENSRNOG00000002256	Art3	305235	-0.284416	11.4104	-1.10349	0.285587	0.84398	-5.02403
ENSRNOG00000002262	Enoph1	305177	-0.00670341	12.7625	-0.0604153	0.952548	0.992177	-5.55068
ENSRNOG00000002265	Casr	24247	-0.561389	10.2682	-1.7937	0.0911362	0.72456	-4.2414
ENSRNOG00000002270	Hnrnpdl	305178	0.0141887	13.9487	0.120441	0.905583	0.986205	-5.54578
ENSRNOG00000002273	Naaa	497009	-0.0629288	11.2527	-0.3523	0.729056	0.960944	-5.49647
ENSRNOG00000002275	Fip1l1	289582	-0.124432	13.4804	-1.30182	0.210792	0.806236	-4.82834
ENSRNOG00000002292	Hnrnpd	79256	-0.026639	15.057	-0.378971	0.709523	0.956152	-5.48774
ENSRNOG00000002301	Uso1	56042	-0.0920111	12.8984	-0.608616	0.551035	0.927471	-5.38701
ENSRNOG00000002302	Corin	289596	-0.122981	6.09298	-0.913341	0.374166	0.883065	-5.1858
ENSRNOG00000002303	Kcnj12	117052	0.124701	11.9259	0.958232	0.351724	0.877645	-5.15001
ENSRNOG00000002305	Slc15a2	60577	0.0485394	13.5746	0.39041	0.701208	0.956152	-5.4838
ENSRNOG00000002309	Hlx	364069	0.010121	8.65084	0.0434545	0.965859	0.993229	-5.55148
ENSRNOG00000002319	Tsn	60381	-0.167593	12.0947	-1.34913	0.195449	0.797305	-4.77787
ENSRNOG00000002327	Gabrb1	25450	-0.0728166	13.1501	-0.670604	0.511715	0.921211	-5.35216
ENSRNOG00000002331	Aldh3a1	25375	-0.169498	7.81053	-1.1547	0.264599	0.832671	-4.97603
ENSRNOG00000002332	Mospd1	317312	0.0681973	11.624	0.446507	0.661013	0.951172	-5.46283
ENSRNOG00000002333	Olr982	404929	0.195803	5.91077	1.75118	0.0984074	0.729676	-4.29711
ENSRNOG00000002336	Gabra4	140675	-0.245043	13.9979	-2.92228	0.00969749	0.503414	-2.54423
ENSRNOG00000002338	Dgke	497978	-0.113142	12.8109	-1.1972	0.248081	0.82711	-4.93484
ENSRNOG00000002339	Mark1	117016	-0.110312	13.6545	-1.39175	0.182405	0.792473	-4.73123
ENSRNOG00000002341	Trim25	494338	-0.104369	10.5118	-0.59646	0.558932	0.929219	-5.39347
ENSRNOG00000002342	Aldh3a2	65183	-0.0752594	13.0393	-1.14957	0.266648	0.833828	-4.98092
ENSRNOG00000002343	Uchl1	29545	0.0823733	15.3482	1.44941	0.16589	0.788033	-4.66638
ENSRNOG00000002350	Eaf2	266787	0.358344	6.90018	1.76212	0.0964899	0.729676	-4.28286
ENSRNOG00000002353	Rab3gap2	289350	0.105885	12.5088	1.30021	0.211329	0.806236	-4.83003
ENSRNOG00000002358	Scpep1	114861	-0.057587	13.0156	-0.565284	0.579457	0.933513	-5.40947
ENSRNOG00000002360	Gabrg1	140674	-0.0931149	13.0319	-0.846157	0.409523	0.89624	-5.23649
ENSRNOG00000002361	Prkg2	25523	-0.173903	12.0178	-1.16087	0.26215	0.830446	-4.97013
ENSRNOG00000002364	Rnf112	24916	0.163021	13.5111	1.38484	0.184471	0.793598	-4.73887
ENSRNOG00000002365	Itm2a	317218	0.0444552	13.7346	0.434858	0.669278	0.951969	-5.46741
ENSRNOG00000002369	Rgs8	54297	-0.463166	12.5896	-2.03303	0.0583969	0.669061	-3.91326
ENSRNOG00000002373	Akap1	114124	-0.189793	12.7714	-1.54433	0.141396	0.766231	-4.55547
ENSRNOG00000002378	Bpnt1	64473	-0.0785911	13.1797	-0.518285	0.611113	0.942031	-5.43203
ENSRNOG00000002379	Plac1	317316	0.28847	7.36663	0.958423	0.35163	0.877645	-5.14985
ENSRNOG00000002381	Bmp3	25667	0.116624	10.1678	0.420822	0.679294	0.951969	-5.47277
ENSRNOG00000002382	LOC102553715	287382	-0.0236045	11.2758	-0.0871391	0.931606	0.988917	-5.5489
ENSRNOG00000002387	Tceal1	302593	0.00513612	13.5956	0.0605157	0.952469	0.992177	-5.55068
ENSRNOG00000002389	Morf4l2	317413	-0.064206	14.4275	-0.983526	0.339497	0.871743	-5.12918
ENSRNOG00000002393	Eprs	289352	-0.00435713	13.4128	-0.0484949	0.961902	0.992577	-5.55127
ENSRNOG00000002403	Fam129a	63912	-0.0942877	9.65591	-0.628825	0.538039	0.924835	-5.376
ENSRNOG00000002408	Rbm47	305340	0.37705	8.72623	0.87026	0.396595	0.889366	-5.2187
ENSRNOG00000002413	Gpc4	317322	0.198827	9.9373	0.695589	0.49633	0.917506	-5.33722
ENSRNOG00000002417	Serpinb10	266775	-0.0154901	6.2765	-0.067834	0.94673	0.991415	-5.55025
ENSRNOG00000002418	Tgfb2	81809	0.0383867	12.72	0.372691	0.714104	0.956977	-5.48985
ENSRNOG00000002419	Plp1	24943	-0.0164731	15.6065	-0.189623	0.851909	0.978066	-5.5361
ENSRNOG00000002425	Pctp	29510	-0.0351879	8.68623	-0.229819	0.821046	0.972579	-5.5285
ENSRNOG00000002433	G3bp2	305240	-0.198084	14.0286	-3.39713	0.00353433	0.42837	-1.76793
ENSRNOG00000002434	Tmem100	497979	0.05506	12.236	0.497349	0.62548	0.945767	-5.44147
ENSRNOG00000002436	Mmd	303439	-0.0848846	14.6186	-1.1849	0.25278	0.828093	-4.94689
ENSRNOG00000002440	Ralb	116546	0.0393778	12.8782	0.401269	0.693351	0.955837	-5.47995
ENSRNOG00000002443	Mfap3	287299	-0.148721	12.0798	-1.44681	0.16661	0.788033	-4.66936
ENSRNOG00000002449	Maged2	113947	-0.0088162	12.8923	-0.107679	0.915544	0.986293	-5.54709
ENSRNOG00000002450	Rrp15	360895	-0.0404685	12.1789	-0.403385	0.691824	0.955663	-5.47919
ENSRNOG00000002454	Rnf2	304850	-0.150973	11.8568	-2.25446	0.0380214	0.655822	-3.59067
ENSRNOG00000002460	Serpinb2	60325	0.0829381	5.86065	0.723275	0.4796	0.913613	-5.32006
ENSRNOG00000002468	Tnr	25567	-0.0527443	13.0974	-0.718553	0.48243	0.913613	-5.32303
ENSRNOG00000002470	Ifi47	246208	0.149513	9.46676	0.650141	0.524516	0.923857	-5.36402
ENSRNOG00000002478	Insig2	288985	-0.203253	12.4629	-2.52492	0.0221028	0.606814	-3.17744
ENSRNOG00000002484	Chrna9	65024	0.23984	6.44608	1.07253	0.298861	0.856126	-5.05215
ENSRNOG00000002488	Galnt10	170501	-0.272955	10.7709	-1.66329	0.115056	0.740425	-4.40954
ENSRNOG00000002506	Cdkl2	305242	-0.0424105	13.171	-0.245677	0.80895	0.96943	-5.52511
ENSRNOG00000002511	Flt4	114110	-0.187928	9.80537	-1.00157	0.330958	0.86998	-5.11402
ENSRNOG00000002514	Ccdc93	304743	-0.115631	10.6233	-1.03092	0.317397	0.865524	-5.08888
ENSRNOG00000002516	Mtm1	288762	-0.076769	13.2107	-0.988047	0.337343	0.871424	-5.1254
ENSRNOG00000002517	Pdc	25343	0.309899	7.15693	1.97876	0.0647161	0.669061	-3.98969
ENSRNOG00000002524	Gpr37	117549	0.0730171	14.8948	0.540135	0.596292	0.938612	-5.42177
ENSRNOG00000002525	Ptgs2	29527	0.087301	12.5349	0.28938	0.775881	0.965305	-5.51459
ENSRNOG00000002532	Prm1	24685	-0.108749	8.88631	-0.376621	0.711236	0.956152	-5.48853
ENSRNOG00000002536	C1galt1c1	302499	-0.000654742	10.952	-0.00682077	0.994639	0.999313	-5.55231
ENSRNOG00000002538	Epb41l5	304733	-0.308737	7.64099	-1.31625	0.206014	0.803166	-4.81309
ENSRNOG00000002539	Prm2	25345	-0.0705398	8.56262	-0.540403	0.596111	0.938612	-5.42165
ENSRNOG00000002540	Rhoh	305341	0.190607	7.88756	0.795158	0.437767	0.904493	-5.27263
ENSRNOG00000002541	Pds5a	305343	-0.0144937	11.5042	-0.164552	0.871288	0.981519	-5.54011
ENSRNOG00000002542	Heatr6	497972	-0.112815	9.30304	-1.30279	0.210467	0.806236	-4.82732
ENSRNOG00000002546	Rchy1	289508	-0.0549824	11.6709	-0.520993	0.609267	0.941558	-5.43078
ENSRNOG00000002553	Smim14	364154	-0.0763154	13.6043	-1.13717	0.27165	0.836408	-4.99267
ENSRNOG00000002555	Serpinb7	117092	-0.0441617	5.86	-0.210198	0.836077	0.977333	-5.53239
ENSRNOG00000002563	Mcts1	302500	-0.189618	11.8164	-1.8809	0.0776844	0.698295	-4.1246
ENSRNOG00000002564	Prm3	442921	-0.273113	6.28289	-1.58231	0.132484	0.758459	-4.50969
ENSRNOG00000002566	Tnp2	24840	-0.284934	9.26588	-2.37137	0.0301406	0.642877	-3.4143
ENSRNOG00000002568	Socs1	252971	-0.0314971	6.92719	-0.158489	0.875988	0.981519	-5.54099
ENSRNOG00000002571	Tekt5	363538	0.0197155	7.73155	0.0903504	0.929092	0.988699	-5.54864
ENSRNOG00000002572	Cacybp	289144	-0.0488083	13.2396	-0.554221	0.586833	0.935352	-5.41495
ENSRNOG00000002574	Nubp1	287042	-0.0396151	11.2067	-0.56452	0.579965	0.933513	-5.40985
ENSRNOG00000002579	Parm1	286894	-0.0645544	11.728	-0.400936	0.693592	0.955837	-5.48007
ENSRNOG00000002580	Trmt1l	304851	-0.198943	11.1009	-2.33378	0.0324908	0.651599	-3.47142
ENSRNOG00000002582	Hand1	59112	-0.0609656	6.60177	-0.494993	0.627107	0.946377	-5.44251
ENSRNOG00000002593	Esrrg	360896	0.0670457	11.7511	0.321391	0.751933	0.963675	-5.50581
ENSRNOG00000002595	Dpp10	363972	-0.26025	11.7137	-1.1851	0.252702	0.828093	-4.9467
ENSRNOG00000002597	Hsd17b6	286964	0.41051	6.06369	4.6859	0.000226906	0.386669	0.292032
ENSRNOG00000002598	Hnf1b	25640	-0.0384884	7.15738	-0.254958	0.801894	0.969305	-5.52302
ENSRNOG00000002599	Grap	363616	0.159837	7.93402	1.00328	0.330155	0.86998	-5.11257
ENSRNOG00000002610	Carhsp1	260416	0.171504	11.9425	0.76171	0.456941	0.909369	-5.29522
ENSRNOG00000002612	Ddx52	85432	-0.000388858	10.8505	-0.00444111	0.99651	0.999357	-5.55232
ENSRNOG00000002618	Ivns1abp	289089	-0.109074	14.8346	-1.13164	0.273902	0.836408	-4.99787
ENSRNOG00000002628	LOC108348133	286981	0.0958284	6.12548	0.922948	0.369283	0.882511	-5.17826
ENSRNOG00000002630	Cnot8	363603	-0.000824262	13.393	-0.0135118	0.989381	0.998283	-5.55225
ENSRNOG00000002636	Abat	81632	-0.0700167	14.5818	-0.495143	0.627003	0.946377	-5.44244
ENSRNOG00000002640	Serpinb5	116589	-0.0865121	6.83215	-0.194404	0.848224	0.978066	-5.53527
ENSRNOG00000002643	Ugdh	83472	-0.00389071	11.8323	-0.0529448	0.958409	0.992577	-5.55107
ENSRNOG00000002653	Kcnk2	170899	-0.525913	13.9994	-2.48374	0.0240329	0.617595	-3.2415
ENSRNOG00000002657	Pla2g4a	24653	0.0106228	10.7606	0.0589732	0.953679	0.992526	-5.55076
ENSRNOG00000002659	Ciita	85483	-0.0479374	7.50851	-0.27577	0.786135	0.966498	-5.51805
ENSRNOG00000002660	Magee1	317232	-0.025941	14.559	-0.248034	0.807157	0.96943	-5.52458
ENSRNOG00000002664	Emp2	360468	-0.115987	9.74571	-0.541876	0.595119	0.938267	-5.42094
ENSRNOG00000002671	Nme2	83782	0.024192	15.2899	0.389003	0.702229	0.956152	-5.48429
ENSRNOG00000002693	Nme1	191575	-0.00595153	14.6898	-0.0638185	0.949879	0.992177	-5.55049
ENSRNOG00000002695	Tfb2m	289307	-0.0385171	12.1552	-0.38236	0.707056	0.956152	-5.48658
ENSRNOG00000002701	Hgd	360719	-0.114175	5.72988	-1.03461	0.315719	0.863539	-5.08567
ENSRNOG00000002705	Vps4b	360834	-0.102835	12.9617	-1.73593	0.101137	0.729676	-4.31689
ENSRNOG00000002711	Nuf2	304951	-0.0139652	8.12786	-0.0971291	0.923789	0.987193	-5.54807
ENSRNOG00000002713	Zfp672	303165	-0.0821967	10.6093	-1.25496	0.226912	0.817197	-4.87693
ENSRNOG00000002718	Scgb3a1	338418	0.0692206	7.81933	0.57896	0.570406	0.931208	-5.40255
ENSRNOG00000002721	Ndufb4	288088	0.027377	14.2234	0.285783	0.778587	0.965305	-5.51552
ENSRNOG00000002723	Sele	25544	-0.0382268	6.58214	-0.226953	0.823238	0.972748	-5.52909
ENSRNOG00000002724	Prpsap2	117272	-0.128317	12.9041	-1.29286	0.213801	0.806472	-4.83774
ENSRNOG00000002728	Btc	64022	-0.710958	8.27868	-3.16485	0.00580358	0.48895	-2.14892
ENSRNOG00000002730	Rgs5	54294	-0.0319706	14.189	-0.265983	0.793534	0.968035	-5.52043
ENSRNOG00000002746	Fstl1	79210	-0.184575	12.6408	-1.47108	0.160011	0.786967	-4.64152
ENSRNOG00000002751	Zdhhc15	317235	-0.17801	9.76172	-1.14598	0.268088	0.833828	-4.98433
ENSRNOG00000002754	Areg	29183	-0.272456	6.09961	-1.73104	0.102025	0.729676	-4.3232
ENSRNOG00000002755	Pafah1b1	83572	0.0734428	14.2594	0.966953	0.347474	0.876113	-5.14288
ENSRNOG00000002757	Tada2a	360581	-0.0679128	11.3648	-0.914746	0.373449	0.883065	-5.1847
ENSRNOG00000002759	Lias	305348	0.0224415	12.4818	0.232861	0.818723	0.972579	-5.52787
ENSRNOG00000002767	Dlg3	58948	-0.0878519	14.1009	-0.860012	0.402058	0.892701	-5.22632
ENSRNOG00000002771	Ereg	59325	-0.109882	5.7712	-0.623806	0.541251	0.925252	-5.37877
ENSRNOG00000002773	Rgs4	29480	-0.0155347	14.6682	-0.0724564	0.943106	0.990829	-5.54996
ENSRNOG00000002775	Npl	304860	-0.451264	10.3301	-5.10675	9.49251e-05	0.282748	0.919244
ENSRNOG00000002776	Sell	29259	0.248889	6.30262	1.82298	0.0864061	0.715625	-4.20255
ENSRNOG00000002778	Aatf	114512	-0.0829591	10.9402	-0.900431	0.380796	0.884972	-5.19581
ENSRNOG00000002783	Serpinc1	304917	-0.10788	6.37662	-0.424386	0.676745	0.951969	-5.47143
ENSRNOG00000002784	Pou3f4	29589	-0.285396	11.4475	-1.47191	0.159789	0.786967	-4.64056
ENSRNOG00000002790	Abcb7	302395	-0.196218	11.805	-1.84598	0.0828446	0.711239	-4.17178
ENSRNOG00000002791	Bcl2	24224	-0.121412	11.3986	-1.31544	0.206279	0.803534	-4.81395
ENSRNOG00000002792	Cxcl2	114105	-0.114519	6.63129	-0.828048	0.419414	0.899703	-5.24956
ENSRNOG00000002793	Sstr2	54305	-0.0705922	12.2371	-0.321522	0.751836	0.963675	-5.50577
ENSRNOG00000002794	Selp	25651	-0.0382553	7.06183	-0.21306	0.83388	0.97684	-5.53185
ENSRNOG00000002797	Gpr156	260430	-0.0170022	7.00825	-0.101932	0.920035	0.987139	-5.54764
ENSRNOG00000002802	Cxcl1	81503	-0.028679	8.22911	-0.157148	0.877028	0.981519	-5.54118
ENSRNOG00000002810	Gfpt2	360518	0.000886076	9.56014	0.00747979	0.994121	0.999313	-5.55231
ENSRNOG00000002811	Brinp3	286901	-0.264683	11.9151	-1.91465	0.0729704	0.687986	-4.07851
ENSRNOG00000002812	Lhx1	257634	-0.15236	6.76174	-0.835551	0.415297	0.898253	-5.24418
ENSRNOG00000002813	Dars2	304919	-0.0728725	11.4856	-1.16544	0.260349	0.828757	-4.96574
ENSRNOG00000002820	LOC24906	24906	-0.194301	6.13879	-1.16291	0.261347	0.829646	-4.96818
ENSRNOG00000002821	Phlpp1	59265	0.0711799	13.9766	1.02575	0.319756	0.867319	-5.09335
ENSRNOG00000002823	Mapk9	50658	0.0307193	14.4507	0.384135	0.705764	0.956152	-5.48597
ENSRNOG00000002826	Hsd17b7	29540	-0.172158	12.1445	-1.13147	0.273974	0.836408	-4.99803
ENSRNOG00000002828	Tob1	170842	-0.128871	14.1255	-1.45488	0.164391	0.788033	-4.66014
ENSRNOG00000002829	Ppbp	246358	0.292902	6.86774	1.81184	0.0881786	0.720238	-4.21737
ENSRNOG00000002832	Slc16a2	259248	-0.11047	11.6508	-0.603747	0.554191	0.927471	-5.38962
ENSRNOG00000002833	Gsk3b	84027	-0.116089	13.9205	-1.06174	0.303588	0.858224	-5.06179
ENSRNOG00000002839	Slc19a2	289175	0.0145003	11.6393	0.113685	0.910854	0.986205	-5.54649
ENSRNOG00000002840	Atp5f1b	171374	0.0113802	15.4558	0.190611	0.851147	0.978066	-5.53593
ENSRNOG00000002841	Cdc42bpa	114116	0.00349316	12.9993	0.0446798	0.964897	0.993081	-5.55143
ENSRNOG00000002843	Cxcl6	60665	0.477145	5.86968	1.75956	0.0969362	0.729676	-4.2862
ENSRNOG00000002851	Fam104a	619573	-0.000259578	13.6592	-0.00361905	0.997156	0.999357	-5.55233
ENSRNOG00000002858	Olr1432	287321	-0.014715	6.69144	-0.103679	0.918669	0.987139	-5.54748
ENSRNOG00000002860	Ccdc181	360867	-0.0545196	13.4273	-0.774786	0.449385	0.909036	-5.28649
ENSRNOG00000002862	Clcn5	25749	0.0149833	6.53719	0.111021	0.912934	0.986205	-5.54676
ENSRNOG00000002863	Cacna1e	54234	-0.0396507	11.333	-0.211419	0.83514	0.977259	-5.53216
ENSRNOG00000002864	Nacc1	171454	-0.00883285	14.1596	-0.0772437	0.939355	0.989661	-5.54964
ENSRNOG00000002866	Rassf6	305251	0.304766	6.06902	1.67512	0.112683	0.73597	-4.39462
ENSRNOG00000002878	Afm	282708	-0.301337	5.98122	-2.78224	0.0130022	0.554523	-2.77002
ENSRNOG00000002879	Psen2	81751	-0.0040354	11.56	-0.0401939	0.968419	0.993704	-5.5516
ENSRNOG00000002884	Blzf1	498266	-0.12412	12.4747	-2.30521	0.03439	0.651599	-3.51457
ENSRNOG00000002886	Myh10	79433	0.0727251	13.4663	0.698722	0.49442	0.91686	-5.33531
ENSRNOG00000002889	Afp	24177	-0.202616	7.13419	-1.17085	0.258227	0.828609	-4.96053
ENSRNOG00000002896	Prdx6	94167	0.0256992	15.1975	0.42265	0.677986	0.951969	-5.47208
ENSRNOG00000002898	Nme7	171566	-0.183848	12.88	-1.92166	0.0720242	0.687034	-4.06888
ENSRNOG00000002903	Specc1	303208	-0.121993	12.3886	-1.33934	0.198548	0.800772	-4.78843
ENSRNOG00000002906	Nr1i2	84385	-0.16789	6.14008	-0.950847	0.35535	0.878927	-5.156
ENSRNOG00000002908	Slc35a4	257647	0.0799298	13.1828	0.977252	0.342502	0.874493	-5.13439
ENSRNOG00000002911	Alb	24186	0.278404	7.57407	1.41618	0.175252	0.79005	-4.70399
ENSRNOG00000002914	Trmt1	288914	0.103173	12.0336	1.49716	0.153162	0.778637	-4.61122
ENSRNOG00000002916	Car4	29242	0.196781	12.8526	0.926985	0.367244	0.881996	-5.17508
ENSRNOG00000002918	FAM187A	287741	-0.0594347	7.21232	-0.319836	0.753091	0.963675	-5.50626
ENSRNOG00000002919	Gfap	24387	0.120826	14.7521	0.918977	0.371296	0.882599	-5.18139
ENSRNOG00000002921	Akap4	79254	-0.140386	6.17416	-0.97441	0.343869	0.874493	-5.13674
ENSRNOG00000002922	Adora2b	29316	0.199273	11.2304	1.6831	0.111105	0.73597	-4.38453
ENSRNOG00000002925	Tsx	29391	-0.0693573	6.85067	-0.566214	0.578839	0.933513	-5.409
ENSRNOG00000002928	Guk1	303179	0.0705901	14.5852	0.863656	0.40011	0.89182	-5.22362
ENSRNOG00000002934	Atp1b1	25650	-0.0346582	15.4696	-0.538956	0.597087	0.93887	-5.42234
ENSRNOG00000002937	Ren	24715	-0.0649906	7.93632	-0.304836	0.764288	0.963675	-5.51046
ENSRNOG00000002941	Uhmk1	246332	-0.170684	13.2697	-1.89321	0.0759351	0.696526	-4.10785
ENSRNOG00000002946	Socs3	89829	0.169225	8.4758	1.69497	0.108794	0.73529	-4.36945
ENSRNOG00000002948	Abcc3	140668	-0.357423	8.10293	-1.33761	0.199102	0.801113	-4.7903
ENSRNOG00000002950	Lyl1	304663	-0.0822548	7.83035	-0.292174	0.773781	0.965049	-5.51386
ENSRNOG00000002953	P2ry4	63843	0.0612568	8.73053	0.344452	0.734841	0.961281	-5.49892
ENSRNOG00000002964	Xcl1	171371	-0.0467485	7.20397	-0.169283	0.867624	0.980325	-5.53939
ENSRNOG00000002968	Tnfsf4	89814	0.156077	6.71391	1.08312	0.294269	0.852575	-5.0426
ENSRNOG00000002969	Itpkb	54260	0.0778344	10.3935	0.472442	0.642776	0.947854	-5.45221
ENSRNOG00000002978	Faslg	25385	-0.0748416	8.35843	-0.254731	0.802066	0.969305	-5.52307
ENSRNOG00000002983	Nf1x	81524	0.231441	14.7384	1.67693	0.112324	0.73597	-4.39234
ENSRNOG00000002984	Bmp15	59302	0.207728	8.58262	0.738061	0.470805	0.91081	-5.31065
ENSRNOG00000002989	Nmt1	259274	0.214384	12.6448	2.32226	0.0332445	0.651599	-3.48885
ENSRNOG00000002991	Srr	303306	-0.0137754	13.403	-0.199891	0.843999	0.978066	-5.5343
ENSRNOG00000002997	Slc9a3r2	116501	0.0939665	13.2408	1.05574	0.306244	0.861063	-5.06712
ENSRNOG00000002999	Timmdc1	303922	-0.0612445	13.0637	-0.991219	0.335838	0.86998	-5.12275
ENSRNOG00000003020	Slc25a47	299316	-0.129876	7.46296	-0.75801	0.459094	0.909369	-5.29766
ENSRNOG00000003026	Rad23a	361381	-0.0768241	12.901	-0.927505	0.366982	0.881996	-5.17467
ENSRNOG00000003029	Calr	64202	-0.00920194	15.2465	-0.149274	0.88314	0.982425	-5.54227
ENSRNOG00000003031	Atp2b4	29600	-0.462316	13.4598	-1.9022	0.0746795	0.694773	-4.09557
ENSRNOG00000003038	Sft2d2	360868	0.0553627	8.53738	0.367498	0.717901	0.958105	-5.49157
ENSRNOG00000003049	Hsd17b10	63864	-0.0097444	13.6591	-0.0926707	0.927277	0.988459	-5.54845
ENSRNOG00000003063	Phka1	64561	-0.136832	11.9415	-0.943024	0.359221	0.881362	-5.1623
ENSRNOG00000003064	Bst1	81506	-0.144471	7.63544	-0.553156	0.587545	0.935352	-5.41547
ENSRNOG00000003065	Glyr1	360477	0.0335592	13.594	0.324666	0.749498	0.963544	-5.50486
ENSRNOG00000003067	Npffr2	78964	0.333542	6.41213	2.42306	0.0271692	0.632623	-3.33519
ENSRNOG00000003069	Cd38	25668	-0.0368471	10.9097	-0.254318	0.80238	0.969305	-5.52316
ENSRNOG00000003070	Pigl	192263	0.00905938	10.5639	0.0917989	0.927959	0.988534	-5.54853
ENSRNOG00000003075	Tmem39a	288092	-0.057001	11.2283	-0.711443	0.486709	0.91581	-5.32747
ENSRNOG00000003076	Rbms2	288771	-0.111543	13.95	-0.689304	0.500174	0.917506	-5.34103
ENSRNOG00000003081	Ribc1	317431	-0.116608	10.7342	-0.919126	0.37122	0.882599	-5.18127
ENSRNOG00000003084	Parp1	25591	0.0201916	13.176	0.252539	0.803732	0.969305	-5.52357
ENSRNOG00000003085	Mycs	24581	-0.0237566	7.20817	-0.113206	0.911228	0.986205	-5.54654
ENSRNOG00000003094	Cmahp	361245	-0.0032726	5.75502	-0.0353667	0.97221	0.994841	-5.55177
ENSRNOG00000003095	Fgfbp1	64535	-0.0833442	7.64934	-0.395202	0.697736	0.956152	-5.48211
ENSRNOG00000003098	Prom1	60357	-0.0638598	12.1951	-0.387445	0.70336	0.956152	-5.48483
ENSRNOG00000003100	Dusp12	64014	-0.0838047	9.47693	-0.739438	0.469991	0.91081	-5.30976
ENSRNOG00000003104	Trpv2	29465	-0.118818	11.3884	-0.712397	0.486133	0.915593	-5.32688
ENSRNOG00000003108	Acbd4	303577	0.276981	12.7091	2.21191	0.0413366	0.657095	-3.65388
ENSRNOG00000003114	B4galt4	303923	-0.170718	11.1118	-1.78409	0.0927363	0.72456	-4.25406
ENSRNOG00000003117	Psmd12	287772	0.0472673	13.362	0.728594	0.476425	0.912044	-5.3167
ENSRNOG00000003119	Gc	24384	-0.158483	6.21708	-1.55275	0.139377	0.764411	-4.54538
ENSRNOG00000003120	Prelp	84400	0.136107	13.3302	0.779369	0.446755	0.90801	-5.2834
ENSRNOG00000003121	Rtn4rl1	303311	0.155201	13.7659	1.18846	0.251412	0.828093	-4.94341
ENSRNOG00000003123	Rpa1	287524	0.0201538	9.33675	0.211861	0.8348	0.977152	-5.53208
ENSRNOG00000003125	Rogdi	287061	-0.00439938	14.242	-0.0568927	0.955311	0.992526	-5.55087
ENSRNOG00000003127	Spryd4	288772	0.00316825	10.9793	0.0269439	0.978826	0.994841	-5.55201
ENSRNOG00000003134	Slc4a4	84484	-0.171669	12.9874	-1.17613	0.25617	0.828572	-4.95542
ENSRNOG00000003139	Smc1a	63996	0.0781905	13.4588	0.892682	0.384813	0.887365	-5.20175
ENSRNOG00000003147	Sqstm1	113894	0.0780744	15.1081	1.14462	0.268636	0.833828	-4.98562
ENSRNOG00000003148	Timp2	29543	-0.0337907	13.9105	-0.461014	0.650784	0.949604	-5.45696
ENSRNOG00000003149	Farsa	288917	0.0355066	13.6698	0.365887	0.71908	0.958105	-5.4921
ENSRNOG00000003150	Mpc2	100359982	0.0980017	13.5315	1.50337	0.151569	0.775809	-4.60396
ENSRNOG00000003151	Bfar	304709	-0.0915997	12.7926	-1.34155	0.197846	0.800543	-4.78606
ENSRNOG00000003163	Sdhc	289217	0.00752754	14.5303	0.0916448	0.928079	0.988541	-5.54854
ENSRNOG00000003164	Pla2g10	29359	-0.204889	6.9728	-1.01885	0.322926	0.868825	-5.0993
ENSRNOG00000003171	Mpz	24564	-0.0955664	6.26042	-0.55819	0.584181	0.934103	-5.413
ENSRNOG00000003172	Serpinf1	287526	0.017942	11.5622	0.0585535	0.954008	0.992526	-5.55078
ENSRNOG00000003177	Mat2b	683630	0.00902124	13.5169	0.0787883	0.938145	0.989504	-5.54953
ENSRNOG00000003178	Mageh1	367767	0.0687916	13.2956	0.81123	0.428736	0.90374	-5.26146
ENSRNOG00000003183	Fmod	64507	0.368629	10.8563	0.783224	0.44455	0.907183	-5.28079
ENSRNOG00000003185	Acbd3	289312	-0.216326	12.5271	-2.37426	0.0299668	0.642877	-3.4099
ENSRNOG00000003186	Anks3	302937	-0.0281394	12.3223	-0.307657	0.762178	0.963675	-5.50969
ENSRNOG00000003189	Cited1	64466	-0.333622	10.3292	-2.64796	0.017176	0.58472	-2.98405
ENSRNOG00000003191	Bhlhb9	317407	-0.0879592	11.9258	-1.11792	0.279552	0.837056	-5.01069
ENSRNOG00000003195	Caskin1	140722	0.305739	12.3272	1.69255	0.109263	0.73597	-4.37253
ENSRNOG00000003198	RGD1305733	360459	0.0966302	13.3721	0.802212	0.433789	0.904493	-5.26775
ENSRNOG00000003203	Hexim1	498008	0.0428076	13.7902	0.73885	0.470338	0.91081	-5.31014
ENSRNOG00000003206	Actr3	81732	-0.0313442	14.8763	-0.505786	0.619671	0.943447	-5.43771
ENSRNOG00000003210	Olr1463	287363	0.0147292	7.39247	0.111395	0.912642	0.986205	-5.54673
ENSRNOG00000003217	Lgals3bp	245955	0.216249	12.8171	0.825796	0.420655	0.899703	-5.25117
ENSRNOG00000003221	Myoc	81523	0.08313	6.6464	0.602425	0.555049	0.927471	-5.39032
ENSRNOG00000003223	Degs1	58970	-0.0902072	14.0522	-0.798481	0.43589	0.904493	-5.27034
ENSRNOG00000003226	Mprip	116504	0.0136074	14.5138	0.201975	0.842396	0.978066	-5.53392
ENSRNOG00000003228	Mid1ip1	404280	0.0477756	13.6217	0.426753	0.675054	0.951969	-5.47053
ENSRNOG00000003232	Slc9a3r1	59114	0.116861	14.619	0.826459	0.420289	0.899703	-5.25069
ENSRNOG00000003233	Serpinf2	287527	0.00307138	7.02715	0.0141437	0.988884	0.998204	-5.55224
ENSRNOG00000003234	Mgrn1	302938	0.0328546	14.691	0.463505	0.649034	0.949604	-5.45594
ENSRNOG00000003239	Cant1	246272	-0.0386035	11.2294	-0.451486	0.657494	0.949951	-5.46084
ENSRNOG00000003241	Gabrg2	29709	-0.0299382	14.0089	-0.327169	0.747638	0.963544	-5.50413
ENSRNOG00000003242	Gulp1	314543	-0.332994	9.35292	-1.73121	0.101995	0.729676	-4.32298
ENSRNOG00000003244	Ltc4s	114097	0.0156297	8.23382	0.0630249	0.950501	0.992177	-5.55054
ENSRNOG00000003245	Cacng1	29658	-0.623509	7.63424	-1.72177	0.10373	0.729826	-4.33515
ENSRNOG00000003247	Sde2	289315	-0.315959	12.0639	-4.07029	0.000835023	0.386669	-0.672115
ENSRNOG00000003248	Mpzl1	360871	-0.0915603	14.2562	-1.14706	0.267655	0.833828	-4.98331
ENSRNOG00000003253	Qdpr	64192	0.0380819	14.9578	0.257638	0.799859	0.96889	-5.5224
ENSRNOG00000003254	Il23a	155140	-0.103987	9.30994	-0.955278	0.353171	0.878927	-5.15241
ENSRNOG00000003256	Ccng1	25405	0.0954857	13.6244	0.912074	0.374813	0.883065	-5.18678
ENSRNOG00000003258	Cdc73	304832	-0.159019	13.3767	-1.57115	0.135051	0.760969	-4.52322
ENSRNOG00000003259	C1qtnf1	303701	0.1191	9.47901	0.675443	0.508714	0.920645	-5.34931
ENSRNOG00000003260	Nr1i3	65035	-0.0902758	13.9214	-1.30176	0.210811	0.806236	-4.8284
ENSRNOG00000003262	Cacng4	140725	-0.318855	14.1404	-2.36742	0.0303802	0.642877	-3.42033
ENSRNOG00000003267	Pycr2	364064	0.0170942	11.3555	0.118784	0.906875	0.986205	-5.54596
ENSRNOG00000003269	Atp6v0e1	94170	0.111107	12.905	0.971693	0.345179	0.874493	-5.13898
ENSRNOG00000003273	Spata20	360604	-0.0601158	8.73084	-0.392011	0.700048	0.956152	-5.48324
ENSRNOG00000003275	Spata32	287747	-0.176017	7.85986	-0.631222	0.536509	0.924666	-5.37468
ENSRNOG00000003276	Myo1d	25485	-0.019639	12.4132	-0.111881	0.912262	0.986205	-5.54668
ENSRNOG00000003280	Grin2c	24411	0.2817	12.1062	2.13618	0.0479059	0.663657	-3.765
ENSRNOG00000003284	Epn3	360605	0.803778	9.5486	3.82271	0.0014187	0.397575	-1.07188
ENSRNOG00000003288	Cacng5	140726	-0.636384	11.309	-3.49892	0.00284172	0.428359	-1.60089
ENSRNOG00000003289	Lap3	289668	0.021278	13.9826	0.159145	0.875479	0.981519	-5.5409
ENSRNOG00000003296	Dck	79127	-0.150208	12.0835	-0.625142	0.540395	0.924835	-5.37804
ENSRNOG00000003298	Cd247	25300	-0.274509	7.44858	-1.57338	0.134536	0.760969	-4.52053
ENSRNOG00000003300	Btg2	29619	0.2319	12.1215	1.0024	0.330572	0.86998	-5.11333
ENSRNOG00000003302	Flcn	303185	0.0118608	12.7331	0.17102	0.86628	0.97991	-5.53913
ENSRNOG00000003304	Chad	29195	-0.0157337	8.24874	-0.117378	0.907972	0.986205	-5.54611
ENSRNOG00000003305	Cxcr3	84475	-0.115318	7.06583	-0.608243	0.551276	0.927471	-5.38721
ENSRNOG00000003313	Glra2	24397	-0.430308	9.91368	-1.80629	0.0890742	0.721372	-4.22474
ENSRNOG00000003328	Cdip1	360480	0.0127698	14.7229	0.148982	0.883366	0.982425	-5.54231
ENSRNOG00000003330	Acsf2	619561	0.00685288	12.6913	0.0588365	0.953786	0.992526	-5.55077
ENSRNOG00000003336	Mybph	83708	0.196728	13.3114	2.75065	0.013886	0.556372	-2.82061
ENSRNOG00000003338	Pmp22	24660	0.16187	13.3025	1.03488	0.315596	0.863539	-5.08543
ENSRNOG00000003343	Canx	29144	-0.0540725	14.9418	-0.693878	0.497375	0.917506	-5.33826
ENSRNOG00000003347	Olr1016	288858	0.209397	6.78394	1.29802	0.212063	0.806236	-4.83233
ENSRNOG00000003357	Col3a1	84032	-0.311917	11.4453	-0.712494	0.486075	0.915593	-5.32682
ENSRNOG00000003359	Ogt	26295	-0.10966	13.7017	-0.808289	0.43038	0.903906	-5.26352
ENSRNOG00000003365	Cadm3	360882	0.0384904	14.407	0.27659	0.785516	0.966498	-5.51784
ENSRNOG00000003370	Otc	25611	0.258641	7.16965	1.11705	0.279914	0.837056	-5.0115
ENSRNOG00000003385	Glrx2	114022	-0.0739181	13.4218	-0.68738	0.501355	0.918315	-5.34219
ENSRNOG00000003397	Adprm	287406	-0.0225872	12.2733	-0.298288	0.769193	0.96473	-5.51224
ENSRNOG00000003398	Tomm40l	304971	-0.297318	13.3099	-2.00263	0.0618645	0.669061	-3.95621
ENSRNOG00000003399	Hnrnph1	140931	-0.0787144	14.5386	-1.23676	0.233425	0.820604	-4.89541
ENSRNOG00000003400	Fmo4	246247	-0.0155321	8.8862	-0.133253	0.895599	0.985111	-5.54431
ENSRNOG00000003402	Stx6	60562	0.0221451	13.5417	0.257447	0.800004	0.96889	-5.52244
ENSRNOG00000003424	Elac2	282826	-0.0184206	12.9056	-0.260176	0.797934	0.968865	-5.52181
ENSRNOG00000003428	Rufy3	360921	-0.108617	14.0921	-2.03389	0.0583015	0.669061	-3.91204
ENSRNOG00000003439	Il15	25670	0.051226	7.36813	0.34429	0.73496	0.961281	-5.49897
ENSRNOG00000003442	Adora1	29290	0.160942	13.6366	0.824783	0.421213	0.899703	-5.25189
ENSRNOG00000003453	Lypd1	360838	-0.530613	13.3719	-2.22656	0.0401658	0.655822	-3.63218
ENSRNOG00000003456	Actrt1	302796	0.0441959	6.5002	0.25112	0.80481	0.96943	-5.52389
ENSRNOG00000003468	Capn8	170808	0.409355	6.15819	3.41289	0.00341705	0.42837	-1.74206
ENSRNOG00000003469	MAST1	353118	0.356306	12.9146	2.26233	0.0374359	0.655822	-3.57892
ENSRNOG00000003470	Fundc1	363442	-0.0648571	10.9609	-0.829582	0.41857	0.899648	-5.24846
ENSRNOG00000003476	Slc6a4	25553	-0.0422084	6.38967	-0.304044	0.764881	0.963675	-5.51068
ENSRNOG00000003486	Mnda	304988	-0.0879442	5.77213	-0.673102	0.510165	0.920645	-5.35069
ENSRNOG00000003497	Thoc6	79227	0.0151405	11.0913	0.178419	0.860558	0.978703	-5.53796
ENSRNOG00000003498	Olr1585	406005	-0.0124129	5.6142	-0.119422	0.906377	0.986205	-5.54589
ENSRNOG00000003500	Apoa2	25649	-0.0994405	6.65192	-0.47317	0.642267	0.947854	-5.45191
ENSRNOG00000003504	Rnaseh2a	364974	-0.00767381	13.0878	-0.120571	0.905481	0.986205	-5.54577
ENSRNOG00000003506	Gosr2	64154	0.101142	12.5253	0.996374	0.333401	0.86998	-5.11841
ENSRNOG00000003509	Olr1588	289250	-0.0703818	7.13094	-0.205913	0.839369	0.978066	-5.5332
ENSRNOG00000003510	Fmo2	246245	-0.507017	8.31475	-1.46724	0.161041	0.786967	-4.64594
ENSRNOG00000003512	Gabra1	29705	0.0300177	14.7517	0.255638	0.801378	0.969305	-5.52286
ENSRNOG00000003515	Ephx1	25315	0.0343457	12.7627	0.190077	0.851559	0.978066	-5.53602
ENSRNOG00000003518	Olr1592	289254	-0.00877959	6.6079	-0.058517	0.954037	0.992526	-5.55079
ENSRNOG00000003520	Prdx2	29338	0.0371595	15.2557	0.643404	0.528769	0.924264	-5.36785
ENSRNOG00000003521	Olr1593	289255	0.118261	6.21461	0.812388	0.42809	0.903281	-5.26065
ENSRNOG00000003524	Lrrc59	287633	-0.0599013	14.2306	-0.570255	0.576159	0.933162	-5.40697
ENSRNOG00000003526	Sytl4	140594	-0.354624	8.08428	-1.76529	0.0959408	0.729676	-4.27872
ENSRNOG00000003532	Magea11	302845	0.124257	6.31774	1.05864	0.304957	0.860035	-5.06455
ENSRNOG00000003533	Clcn4	60586	-0.0718651	13.7377	-0.825397	0.420875	0.899703	-5.25145
ENSRNOG00000003537	Spta1	289257	-0.301362	7.82786	-1.36373	0.1909	0.795427	-4.76202
ENSRNOG00000003541	Pggt1b	81746	-0.0967704	11.6748	-1.09169	0.290594	0.848923	-5.03483
ENSRNOG00000003545	Uchl5	360853	-0.0235607	12.1763	-0.298599	0.76896	0.96473	-5.51215
ENSRNOG00000003546	Tnfrsf12a	302965	-0.0064025	9.84092	-0.0286141	0.977514	0.994841	-5.55196
ENSRNOG00000003549	Cnpy2	685814	-0.100243	14.075	-1.28118	0.217777	0.81208	-4.84991
ENSRNOG00000003550	Acbd6	289125	-0.0757044	13.3886	-1.04022	0.313182	0.863242	-5.08077
ENSRNOG00000003551	B4galt3	494342	-0.0309471	13.5116	-0.302707	0.765881	0.963675	-5.51104
ENSRNOG00000003553	Efemp1	305604	-0.212393	11.2149	-0.99178	0.335572	0.86998	-5.12227
ENSRNOG00000003555	Olr1597	405222	-0.012351	6.8515	-0.0804135	0.936872	0.989369	-5.54941
ENSRNOG00000003560	LOC103693685	289261	-0.0247971	7.16205	-0.0967435	0.924091	0.987193	-5.5481
ENSRNOG00000003563	Blmh	287552	-0.00851747	12.938	-0.118499	0.907097	0.986205	-5.54599
ENSRNOG00000003566	Apoh	287774	-0.257088	6.84905	-1.20235	0.246133	0.826373	-4.92977
ENSRNOG00000003569	Gabra6	29708	0.127361	6.39811	0.614954	0.54694	0.926197	-5.3836
ENSRNOG00000003580	Ucp1	24860	-0.130358	6.44352	-0.690777	0.499272	0.917506	-5.34014
ENSRNOG00000003585	Sytl5	302538	-0.446694	10.3101	-2.27966	0.0361753	0.65184	-3.55297
ENSRNOG00000003587	Vegfd	360457	0.187137	6.66589	1.55378	0.139134	0.763516	-4.54416
ENSRNOG00000003594	Tmem183a	289034	-0.0591865	13.6905	-0.791182	0.44002	0.904493	-5.27536
ENSRNOG00000003597	Tuba4a	316531	0.0324106	15.3674	0.405574	0.690246	0.954725	-5.4784
ENSRNOG00000003599	Utp3	305258	0.0173651	12.5713	0.24861	0.806719	0.96943	-5.52446
ENSRNOG00000003611	Dynlt3	363448	-0.0281871	13.6858	-0.457335	0.653371	0.949604	-5.45847
ENSRNOG00000003613	Mid1	54252	-0.0326131	10.6706	-0.199432	0.844352	0.978066	-5.53438
ENSRNOG00000003614	Mgat5	65271	-0.0316864	11.5872	-0.145441	0.886118	0.982776	-5.54278
ENSRNOG00000003620	Fmo3	84493	-0.163965	7.61351	-0.418872	0.680691	0.951969	-5.4735
ENSRNOG00000003622	Cybb	66021	0.265757	8.80331	0.704417	0.490959	0.916123	-5.33182
ENSRNOG00000003625	Ubxn4	304766	-0.0923277	13.5154	-1.96544	0.0663588	0.673727	-4.00828
ENSRNOG00000003626	Atp5pd	641434	0.0802115	14.715	1.1885	0.251398	0.828093	-4.94338
ENSRNOG00000003633	Rcvrn	140936	0.0571468	6.54751	0.302981	0.765676	0.963675	-5.51097
ENSRNOG00000003634	Zfp354a	24522	-0.251823	10.9167	-4.15522	0.000696594	0.386669	-0.536316
ENSRNOG00000003645	Hnrnpab	83498	-0.0233587	14.6274	-0.30164	0.766681	0.964112	-5.51133
ENSRNOG00000003649	Qsox1	84491	0.0403466	11.5378	0.431089	0.671961	0.951969	-5.46887
ENSRNOG00000003653	Fh	24368	-0.0236826	13.7218	-0.345998	0.7337	0.961281	-5.49844
ENSRNOG00000003654	Cldn9	287099	-0.0214485	9.46173	-0.0574302	0.95489	0.992526	-5.55084
ENSRNOG00000003661	Jpt1	287828	0.0187697	14.3845	0.231749	0.819571	0.972579	-5.5281
ENSRNOG00000003668	Olr1404	405065	-0.0538847	7.10783	-0.239559	0.813611	0.971123	-5.52644
ENSRNOG00000003669	Myocd	246297	0.271917	6.2846	2.09995	0.0513766	0.669061	-3.8175
ENSRNOG00000003670	Sumo2	690244	0.037741	15.118	0.627063	0.539165	0.924835	-5.37698
ENSRNOG00000003671	Prop1	266738	-0.000492185	7.19021	-0.00188702	0.998517	0.999481	-5.55233
ENSRNOG00000003673	Nup85	287830	0.06986	11.6172	1.11377	0.281277	0.838726	-5.01453
ENSRNOG00000003674	Pir	363465	-0.0751422	10.8168	-0.544514	0.593343	0.937989	-5.41967
ENSRNOG00000003680	Gabrb2	25451	-0.108848	13.8844	-1.00486	0.329419	0.86998	-5.11124
ENSRNOG00000003683	Glp2r	60432	-0.122814	6.48915	-0.502314	0.622059	0.944208	-5.43927
ENSRNOG00000003687	Rgs2	84583	-0.410201	14.0828	-2.98418	0.00851175	0.497755	-2.44378
ENSRNOG00000003689	Nono	317259	-0.0578254	14.3921	-1.11825	0.279418	0.837056	-5.01039
ENSRNOG00000003695	Mgat4d	304646	-0.0287644	6.13344	-0.213287	0.833706	0.976755	-5.5318
ENSRNOG00000003706	Ufc1	445268	0.00228198	14.0868	0.039149	0.96924	0.993704	-5.55164
ENSRNOG00000003709	Kmo	59113	-0.159981	6.65481	-0.878038	0.392481	0.887428	-5.21287
ENSRNOG00000003714	Clk4	287269	0.0933725	12.7999	0.940538	0.360456	0.881386	-5.16429
ENSRNOG00000003716	Batf3	60462	0.118711	8.06976	0.597389	0.558326	0.929219	-5.39298
ENSRNOG00000003718	Ambn	25376	-0.152558	5.75542	-1.26034	0.225011	0.817197	-4.87141
ENSRNOG00000003720	Prrx1	266813	-0.100986	11.2669	-0.672367	0.510621	0.920645	-5.35113
ENSRNOG00000003721	Paqr4	302967	0.115717	13.6803	1.76043	0.0967845	0.729676	-4.28506
ENSRNOG00000003728	Xylt2	64134	0.182637	12.2815	1.83548	0.0844535	0.713939	-4.18585
ENSRNOG00000003741	Nptx1	266777	0.421534	14.0667	1.4687	0.160647	0.786967	-4.64426
ENSRNOG00000003743	Dars	116483	-0.121152	12.7421	-1.51939	0.147521	0.77291	-4.5851
ENSRNOG00000003745	Atf3	25389	-0.0608228	8.52752	-0.192784	0.849472	0.978066	-5.53556
ENSRNOG00000003746	Gjb1	29584	0.206363	11.5121	1.0401	0.313239	0.863242	-5.08088
ENSRNOG00000003749	Xk	497078	-0.124086	11.3306	-0.956481	0.352581	0.878272	-5.15143
ENSRNOG00000003759	Galc	314360	-0.190138	11.6594	-1.38809	0.183498	0.793242	-4.73528
ENSRNOG00000003763	Prdx4	85274	0.066788	11.1462	0.45716	0.653494	0.949604	-5.45854
ENSRNOG00000003765	Nr0b1	58850	-0.0883062	5.98784	-0.535313	0.599547	0.939151	-5.42407
ENSRNOG00000003772	Csrp2	29317	0.222444	11.5431	1.63327	0.121272	0.745214	-4.44705
ENSRNOG00000003773	Hmox2	79239	-0.0357846	14.3056	-0.53782	0.597854	0.938972	-5.42288
ENSRNOG00000003776	Amtn	689404	-0.0494355	7.29021	-0.339938	0.738175	0.962688	-5.50031
ENSRNOG00000003777	Chrne	29422	-0.102619	7.91423	-0.574234	0.573526	0.932558	-5.40496
ENSRNOG00000003779	Dedd	83631	0.188094	11.0203	1.02178	0.321578	0.868136	-5.09678
ENSRNOG00000003782	Acot9	302640	-0.0192552	12.5135	-0.200971	0.843168	0.978066	-5.5341
ENSRNOG00000003800	Rgs9	29481	-1.0978	14.6064	-2.15154	0.0465007	0.663657	-3.74262
ENSRNOG00000003802	Pttg1	64193	-0.289114	9.83862	-1.32618	0.202776	0.802879	-4.80253
ENSRNOG00000003803	Zdhhc17	366889	-0.0961041	12.2113	-0.694011	0.497293	0.917506	-5.33818
ENSRNOG00000003809	Sat1	302642	0.0656072	13.6287	1.04168	0.312526	0.862988	-5.0795
ENSRNOG00000003812	Nlgn3	171297	-0.178787	14.1899	-3.00498	0.00814583	0.48895	-2.40993
ENSRNOG00000003813	Kcnk10	65272	-0.0305795	7.94319	-0.15493	0.878749	0.981519	-5.54149
ENSRNOG00000003815	Slc25a11	64201	-0.0364379	14.432	-0.600633	0.556214	0.928354	-5.39127
ENSRNOG00000003825	Wdr75	314545	-0.0269088	11.3711	-0.311761	0.759112	0.963675	-5.50855
ENSRNOG00000003831	Tdp1	314380	-0.019582	10.3829	-0.211255	0.835266	0.977259	-5.53219
ENSRNOG00000003833	Nenf	289380	0.0185549	13.0508	0.197052	0.846185	0.978066	-5.53481
ENSRNOG00000003834	Map2k4	287398	0.00169347	13.1587	0.0144149	0.988671	0.998109	-5.55224
ENSRNOG00000003837	Mif4gd	360659	0.0300589	11.2974	0.326363	0.748237	0.963544	-5.50436
ENSRNOG00000003841	Kcnh1	65198	0.00100337	13.0876	0.00544274	0.995722	0.999313	-5.55232
ENSRNOG00000003846	Pitpna	29525	-0.0111155	14.956	-0.141873	0.888892	0.983074	-5.54324
ENSRNOG00000003849	Stx8	59074	0.0313085	11.0077	0.392386	0.699776	0.956152	-5.48311
ENSRNOG00000003853	Scoc	364981	0.010845	12.4931	0.101768	0.920162	0.987139	-5.54765
ENSRNOG00000003855	Dnaja3	360481	-0.184129	13.2018	-2.22203	0.0405245	0.655822	-3.63889
ENSRNOG00000003864	Gipc1	83823	0.0244608	13.8697	0.412721	0.685104	0.953917	-5.47579
ENSRNOG00000003866	Cxcr4	60628	-0.0618426	9.0432	-0.295466	0.771309	0.965049	-5.51299
ENSRNOG00000003869	Sod3	25352	0.345402	10.0435	1.66024	0.115675	0.740425	-4.41337
ENSRNOG00000003872	NEWGENE_620180	170840	-0.0678582	10.0327	-0.467422	0.646288	0.949057	-5.45432
ENSRNOG00000003873	Cpd	25306	0.0375284	13.3607	0.617539	0.545276	0.925987	-5.38219
ENSRNOG00000003879	Rnf167	360554	-0.0470254	14.2098	-0.626581	0.539474	0.924835	-5.37724
ENSRNOG00000003880	Tph2	317675	-0.123188	7.99215	-0.678668	0.50672	0.920361	-5.3474
ENSRNOG00000003881	Nit1	289222	-0.0454143	13.7911	-0.721085	0.480912	0.913613	-5.32144
ENSRNOG00000003883	LOC317456	317456	-0.0828184	7.18683	-0.658468	0.519285	0.923857	-5.35924
ENSRNOG00000003884	Acmsd	171385	-0.0353976	6.79102	-0.294936	0.771707	0.965049	-5.51313
ENSRNOG00000003890	Nap1l1	89825	-0.140949	13.64	-1.98075	0.0644736	0.669061	-3.9869
ENSRNOG00000003895	Rgs1	54289	0.0271632	6.34059	0.110432	0.913394	0.986205	-5.54682
ENSRNOG00000003899	Krt14	287701	0.0612725	8.50394	0.305994	0.763422	0.963675	-5.51015
ENSRNOG00000003901	Cfap36	289859	-0.0705933	14.5043	-1.17063	0.258312	0.828609	-4.96074
ENSRNOG00000003902	Fabp6	25440	0.150353	6.3372	1.14877	0.266969	0.833828	-4.98169
ENSRNOG00000003905	Nsf	60355	0.00886465	15.157	0.168091	0.868547	0.981044	-5.53957
ENSRNOG00000003915	Tmem206	305070	0.0677576	11.6503	0.823371	0.421993	0.899893	-5.25289
ENSRNOG00000003918	Slc25a19	303676	0.0522687	12.0757	0.722396	0.480126	0.913613	-5.32062
ENSRNOG00000003919	Rps6kb1	83840	-0.0646569	12.3688	-0.775481	0.448986	0.909036	-5.28603
ENSRNOG00000003923	Rab21	299799	-0.133341	13.4366	-1.83582	0.0844008	0.713939	-4.1854
ENSRNOG00000003924	Pi4k2b	305419	0.0358355	9.28913	0.538566	0.59735	0.938972	-5.42252
ENSRNOG00000003927	Cd55	64036	-0.303986	9.47664	-1.47841	0.158062	0.786967	-4.63304
ENSRNOG00000003928	Tmco1	289196	0.0265578	13.2458	0.295163	0.771537	0.965049	-5.51307
ENSRNOG00000003931	Arsg	303631	0.046612	10.6507	0.374543	0.712752	0.956356	-5.48923
ENSRNOG00000003946	Tor1aip1	246314	-0.112834	11.5584	-1.29561	0.212873	0.806236	-4.83486
ENSRNOG00000003947	Ntn1	114523	-0.158317	8.6043	-0.572771	0.574493	0.932563	-5.4057
ENSRNOG00000003948	Llgl1	54265	0.0660763	12.6643	0.771632	0.451201	0.909036	-5.28861
ENSRNOG00000003951	Psmc1	117263	0.0382881	13.785	0.563681	0.580523	0.933513	-5.41027
ENSRNOG00000003954	Il2rg	140924	0.0840709	9.43195	0.414632	0.683731	0.953383	-5.47508
ENSRNOG00000003955	Spata7	192225	-0.0586784	11.069	-0.475321	0.640765	0.947516	-5.451
ENSRNOG00000003958	Commd10	361323	-0.119032	12.1006	-1.71485	0.105017	0.729826	-4.34403
ENSRNOG00000003959	Rgs18	289076	-0.325959	7.58098	-0.710078	0.487533	0.915878	-5.32832
ENSRNOG00000003960	Cltrn	57395	0.756151	6.17983	1.38833	0.183424	0.793242	-4.73501
ENSRNOG00000003964	Nsmce2	299957	0.0105555	11.3313	0.0982532	0.92291	0.987193	-5.54797
ENSRNOG00000003965	Amelx	29160	0.374451	6.13654	2.03284	0.0584173	0.669061	-3.91352
ENSRNOG00000003967	Vmp1	192129	-0.0225086	14.8649	-0.35691	0.725666	0.960567	-5.49501
ENSRNOG00000003969	Fam20a	303635	0.278412	9.96541	1.95916	0.0671465	0.673727	-4.01703
ENSRNOG00000003971	Gosr1	94189	-0.208719	11.6299	-2.01635	0.0602764	0.669061	-3.93686
ENSRNOG00000003972	Tshr	25360	-0.0351434	7.90137	-0.167796	0.868775	0.981064	-5.53962
ENSRNOG00000003973	Cyb5r1	304805	0.0991985	13.1197	1.14338	0.269138	0.833828	-4.9868
ENSRNOG00000003975	Pfn1	64303	0.0171456	15.0146	0.312101	0.758858	0.963675	-5.50845
ENSRNOG00000003977	Dusp1	114856	0.263353	13.8353	1.38113	0.185588	0.793598	-4.74296
ENSRNOG00000003980	Ttc1	287208	-0.0426117	13.3826	-0.566486	0.578659	0.933513	-5.40887
ENSRNOG00000003981	Zfp18	303226	-0.0322655	11.5074	-0.446375	0.661107	0.951172	-5.46288
ENSRNOG00000003984	Apln	58812	0.0455346	13.2664	0.312213	0.758775	0.963675	-5.50842
ENSRNOG00000003985	Tmem19	299800	-0.151716	11.4466	-1.72172	0.103739	0.729826	-4.33522
ENSRNOG00000003988	Dnajc27	298859	-0.127156	12.6712	-1.36853	0.189421	0.795427	-4.75678
ENSRNOG00000003990	Grb2	81504	-0.0203766	14.5061	-0.272201	0.788831	0.966789	-5.51893
ENSRNOG00000003992	Pik3r6	497932	0.113653	7.88855	0.665584	0.514839	0.921432	-5.35511
ENSRNOG00000003999	Adcy3	64508	-0.159079	13.419	-1.4758	0.158754	0.786967	-4.63607
ENSRNOG00000004000	Tefm	287554	-0.135857	10.369	-1.35983	0.192105	0.795427	-4.76627
ENSRNOG00000004001	Osgepl1	314548	-0.138004	10.5617	-1.32648	0.202679	0.802879	-4.80221
ENSRNOG00000004006	Dnajb9	24908	-0.0830506	13.0795	-1.18251	0.253698	0.828093	-4.94922
ENSRNOG00000004009	Xpnpep2	117522	-0.380393	6.65544	-2.2091	0.0415652	0.657095	-3.65805
ENSRNOG00000004013	Grip1	84016	-0.12042	12.2929	-0.999884	0.33175	0.86998	-5.11545
ENSRNOG00000004016	Msl3	317464	0.01214	12.3642	0.13859	0.891445	0.983706	-5.54366
ENSRNOG00000004019	Phlda1	29380	-0.293845	13.5222	-3.26016	0.00473678	0.458295	-1.99272
ENSRNOG00000004026	Atp2b1	29598	-0.0706927	15.4781	-1.05196	0.307924	0.862259	-5.07046
ENSRNOG00000004027	Aldh9a1	64040	0.046537	13.0811	0.734328	0.473016	0.91081	-5.31304
ENSRNOG00000004030	Nphs2	170672	-0.151491	6.386	-0.697758	0.495007	0.917162	-5.3359
ENSRNOG00000004049	Baiap2	117542	-0.11854	14.5359	-1.21099	0.242895	0.825063	-4.92122
ENSRNOG00000004050	Snrk	170837	0.00301269	13.0481	0.0482515	0.962093	0.992577	-5.55128
ENSRNOG00000004060	Calm1	24242	0.147128	15.3618	2.52315	0.0221828	0.606814	-3.18021
ENSRNOG00000004062	C4bpa	24235	0.0818034	6.71374	0.457861	0.653001	0.949604	-5.45826
ENSRNOG00000004067	Nrcam	497815	-0.00378545	14.7672	-0.0474889	0.962691	0.992577	-5.55131
ENSRNOG00000004072	Myo1c	65261	-0.0258863	12.8796	-0.257416	0.800028	0.96889	-5.52245
ENSRNOG00000004076	Pms1	494322	-0.0786968	10.5042	-0.748791	0.464484	0.910479	-5.3037
ENSRNOG00000004077	Kcnc2	246153	0.103308	13.7538	0.642364	0.529428	0.924264	-5.36844
ENSRNOG00000004078	Eno3	25438	-0.0651688	11.5641	-0.661141	0.517613	0.922739	-5.35769
ENSRNOG00000004083	Zc3h14	192359	-0.0829591	13.2604	-1.57035	0.135238	0.760969	-4.52419
ENSRNOG00000004089	Enpp2	84050	0.196627	14.3437	1.12603	0.276201	0.836408	-5.00312
ENSRNOG00000004100	Trib1	78969	0.0371797	12.7239	0.182451	0.857443	0.97849	-5.5373
ENSRNOG00000004107	Rpl23	29282	-0.0180889	14.9278	-0.306647	0.762933	0.963675	-5.50997
ENSRNOG00000004111	Soat1	81782	-0.0493557	11.4224	-0.493163	0.628371	0.946679	-5.44331
ENSRNOG00000004117	Kcnv1	60326	-0.0859853	12.8674	-0.324768	0.749422	0.963544	-5.50483
ENSRNOG00000004124	Grpr	24938	0.335455	7.18835	2.02717	0.0590504	0.669061	-3.92155
ENSRNOG00000004125	C4bpb	24236	-0.0638452	6.30909	-0.4365	0.66811	0.951969	-5.46677
ENSRNOG00000004131	Pkn1	29355	0.108187	13.0344	1.21904	0.239905	0.823174	-4.9132
ENSRNOG00000004132	Lasp1	29278	0.0138719	13.7388	0.112372	0.911879	0.986205	-5.54663
ENSRNOG00000004133	Slc7a3	29485	-0.360948	10.3998	-1.59999	0.128499	0.752526	-4.48812
ENSRNOG00000004135	RGD1311745	301079	-0.0225298	12.1296	-0.422383	0.678177	0.951969	-5.47218
ENSRNOG00000004139	Ndel1	170845	-0.0542772	13.6843	-0.802226	0.433781	0.904493	-5.26775
ENSRNOG00000004143	Adipor1	289036	-0.077518	14.3749	-1.12267	0.277585	0.836408	-5.00626
ENSRNOG00000004155	Samd14	287637	-0.251631	11.2022	-1.13033	0.274438	0.836408	-4.9991
ENSRNOG00000004159	Flii	287375	-0.00513759	13.4003	-0.0858449	0.932619	0.988917	-5.549
ENSRNOG00000004160	Prps2	24689	-0.11104	11.7352	-1.00929	0.327353	0.86998	-5.10747
ENSRNOG00000004161	Mtif2	305606	-0.142622	11.3765	-1.47219	0.159713	0.786967	-4.64023
ENSRNOG00000004162	Pfkfb2	24640	-0.0880659	11.3109	-0.716439	0.483699	0.913743	-5.32436
ENSRNOG00000004168	Slc35e4	266687	0.1107	12.5031	1.1564	0.263924	0.832671	-4.97441
ENSRNOG00000004172	Pdk2	81530	0.0341035	14.584	0.593595	0.560802	0.929973	-5.39498
ENSRNOG00000004181	Sdccag8	305002	-0.0829176	11.3801	-1.18257	0.253675	0.828093	-4.94916
ENSRNOG00000004188	LOC298795	298795	0.273891	8.73117	1.27468	0.220012	0.81443	-4.85665
ENSRNOG00000004193	Klhl12	266772	-0.245079	12.9121	-2.89017	0.0103744	0.51168	-2.5962
ENSRNOG00000004196	Rps29	25348	0.015491	14.9612	0.203672	0.841091	0.978066	-5.53361
ENSRNOG00000004197	Asb12	503446	0.166109	7.13616	1.1636	0.261074	0.829646	-4.96751
ENSRNOG00000004201	Rims2	116839	-0.00412421	10.972	-0.0393847	0.969054	0.993704	-5.55163
ENSRNOG00000004212	Fbxw9	288921	0.0967535	10.6748	0.85032	0.407271	0.894574	-5.23345
ENSRNOG00000004219	Dhps	288923	0.161567	12.3838	1.86977	0.0792967	0.700963	-4.13969
ENSRNOG00000004220	Ebag9	299864	-0.04327	13.0263	-0.383124	0.7065	0.956152	-5.48632
ENSRNOG00000004222	S100g	24249	-0.310324	6.04873	-0.920352	0.370598	0.882599	-5.18031
ENSRNOG00000004225	Odf4	303236	-0.137418	6.2463	-1.3587	0.192457	0.795427	-4.7675
ENSRNOG00000004229	Tac3	29191	-0.25287	10.6471	-1.02122	0.321832	0.868136	-5.09725
ENSRNOG00000004234	Mgat2	94273	-0.0836563	12.6855	-1.05366	0.307166	0.861896	-5.06896
ENSRNOG00000004249	Tlr7	317468	0.337867	7.89714	1.17695	0.255852	0.828572	-4.95463
ENSRNOG00000004255	Usf1	83586	0.0875502	13.2351	0.921581	0.369976	0.882511	-5.17934
ENSRNOG00000004257	Ctps2	619580	-0.0723409	12.5959	-0.951637	0.354961	0.878927	-5.15536
ENSRNOG00000004258	Chst7	302302	-0.19899	7.54663	-1.05485	0.306639	0.861445	-5.06791
ENSRNOG00000004259	Dohh	314644	0.197268	12.9396	2.20854	0.0416104	0.657095	-3.65887
ENSRNOG00000004268	Zfp386	25165	0.0326632	9.17765	0.207648	0.838035	0.978066	-5.53287
ENSRNOG00000004269	Myt1l	116668	-0.0153268	13.8075	-0.160118	0.874724	0.981519	-5.54075
ENSRNOG00000004280	Tcn2	64365	0.0579835	13.1344	0.323371	0.750461	0.963675	-5.50524
ENSRNOG00000004282	Arl4a	29308	-0.270051	11.2033	-2.16128	0.0456289	0.661862	-3.72837
ENSRNOG00000004284	Btg1	29618	-0.133616	12.2356	-0.771341	0.451368	0.909036	-5.28881
ENSRNOG00000004287	Wdr83	288924	0.0786009	12.4507	0.789779	0.440817	0.904493	-5.27632
ENSRNOG00000004288	Ptrh2	287593	-0.131372	12.5419	-1.73049	0.102126	0.729676	-4.32391
ENSRNOG00000004291	Cltc	54241	-0.0967301	15.2453	-1.43332	0.17037	0.788033	-4.68467
ENSRNOG00000004292	Sptssa	500651	-0.0116615	13.2761	-0.0987894	0.922491	0.987193	-5.54792
ENSRNOG00000004294	Ascl1	64186	0.297539	8.74119	2.07012	0.054405	0.669061	-3.86038
ENSRNOG00000004296	Nt5c1b	298881	-0.0242227	6.52252	-0.129215	0.898743	0.985485	-5.54479
ENSRNOG00000004298	Dpys	65135	0.0131478	6.95998	0.0883836	0.930632	0.988845	-5.5488
ENSRNOG00000004300	Gtf2a1	83830	-0.0688115	11.7946	-0.922597	0.369461	0.882511	-5.17854
ENSRNOG00000004302	Pah	24616	0.30655	8.65811	0.915838	0.372892	0.883065	-5.18385
ENSRNOG00000004303	Timp3	25358	0.0118165	13.6268	0.0948815	0.925547	0.987941	-5.54827
ENSRNOG00000004304	Syap1	302678	0.0664676	11.5022	0.691114	0.499066	0.917506	-5.33993
ENSRNOG00000004307	Tor3a	304884	-0.010747	11.2474	-0.104973	0.917658	0.986813	-5.54735
ENSRNOG00000004311	Gpr182	29307	-0.0504195	10.4875	-0.511616	0.615672	0.942748	-5.43508
ENSRNOG00000004312	Tmbim4	362884	0.0649864	11.8277	0.755605	0.460497	0.909369	-5.29924
ENSRNOG00000004317	Vipr2	29555	0.011666	9.72833	0.123845	0.902928	0.986205	-5.5454
ENSRNOG00000004320	Tgm4	64679	-0.105486	6.45107	-0.918717	0.371428	0.882599	-5.18159
ENSRNOG00000004322	Sh3kbp1	84357	-0.166137	13.5811	-1.87325	0.0787887	0.700963	-4.13497
ENSRNOG00000004327	Ddc	24311	-0.205779	10.8741	-1.00824	0.327843	0.86998	-5.10837
ENSRNOG00000004330	Chrdl1	363455	0.0800474	11.0309	0.330757	0.744975	0.963544	-5.50307
ENSRNOG00000004332	Egfr	24329	-0.270741	10.4171	-1.17228	0.257668	0.828609	-4.95914
ENSRNOG00000004339	Yy1	24919	-0.0321152	11.9195	-0.422163	0.678335	0.951969	-5.47227
ENSRNOG00000004342	Ahr	25690	0.199702	10.208	1.21017	0.243199	0.825063	-4.92203
ENSRNOG00000004344	Zdhhc3	301081	-0.00270961	12.8013	-0.0458586	0.963971	0.993009	-5.55138
ENSRNOG00000004346	Notch3	56761	0.0600936	9.69803	0.551212	0.588847	0.936418	-5.41642
ENSRNOG00000004351	Slc25a29	314441	0.134276	9.67021	1.01165	0.326255	0.86998	-5.10546
ENSRNOG00000004356	Lrrc52	289199	0.366982	6.80625	2.19338	0.0428622	0.661	-3.68124
ENSRNOG00000004359	Wars	314442	-0.134359	13.6033	-1.5467	0.140827	0.766189	-4.55264
ENSRNOG00000004360	Gemin2	84404	-0.0300493	11.4095	-0.34542	0.734126	0.961281	-5.49862
ENSRNOG00000004364	Babam2	362704	-0.0282625	13.198	-0.361283	0.722455	0.959281	-5.4936
ENSRNOG00000004373	Ddx39a	89827	0.0584703	11.4173	0.672938	0.510266	0.920645	-5.35079
ENSRNOG00000004377	Lpin1	313977	-0.09164	12.0231	-1.1133	0.281476	0.838726	-5.01498
ENSRNOG00000004378	Abca5	286970	-0.0280937	10.7123	-0.216186	0.831483	0.97571	-5.53124
ENSRNOG00000004380	Il12b	64546	0.0750677	7.06074	0.456692	0.653824	0.949604	-5.45873
ENSRNOG00000004390	Alx1	25401	-0.0187805	7.82617	-0.0668697	0.947486	0.991805	-5.55031
ENSRNOG00000004400	Avpr1a	25107	-0.0317657	7.02673	-0.123535	0.90317	0.986205	-5.54544
ENSRNOG00000004401	Mrpl13	299938	0.00859152	12.89	0.116904	0.908342	0.986205	-5.54616
ENSRNOG00000004404	Tac4	282829	0.0451551	7.04848	0.271738	0.789181	0.966789	-5.51904
ENSRNOG00000004405	Pigr	25046	0.0135063	7.55795	0.154923	0.878754	0.981519	-5.54149
ENSRNOG00000004410	Pax6	25509	-0.11895	11.5785	-0.704532	0.490889	0.916123	-5.33175
ENSRNOG00000004411	Tspan8	171048	0.0125529	10.7427	0.0556964	0.95625	0.992526	-5.55093
ENSRNOG00000004414	F11r	116479	0.179976	10.439	1.00816	0.32788	0.86998	-5.10844
ENSRNOG00000004420	Rad21	314949	-0.0203165	14.2796	-0.388927	0.702284	0.956152	-5.48431
ENSRNOG00000004421	Rxylt1	299841	0.049582	11.9748	0.602762	0.55483	0.927471	-5.39014
ENSRNOG00000004423	Zbtb18	64619	0.369478	14.2652	1.98408	0.0640709	0.669061	-3.98225
ENSRNOG00000004424	Rabif	304807	0.0833724	12.4964	0.765324	0.454845	0.909369	-5.29282
ENSRNOG00000004437	Map2k6	114495	-0.147993	13.0919	-1.84133	0.0835541	0.712318	-4.17802
ENSRNOG00000004438	Cntn1	117258	-0.00373983	14.9846	-0.0588358	0.953787	0.992526	-5.55077
ENSRNOG00000004440	Fignl1	289777	-0.146215	7.70477	-0.911169	0.375276	0.883065	-5.18749
ENSRNOG00000004441	Fcmr	548326	0.113359	7.52641	0.380372	0.708503	0.956152	-5.48726
ENSRNOG00000004451	Mc3r	29310	0.138128	7.93867	0.375467	0.712078	0.956152	-5.48892
ENSRNOG00000004456	Clhc1	289865	-0.0741849	6.13141	-0.52267	0.608124	0.941173	-5.43
ENSRNOG00000004464	Sel1l	314352	-0.154873	13.838	-2.2135	0.0412081	0.657095	-3.65153
ENSRNOG00000004470	Il24	170819	0.0687737	6.08714	0.515572	0.612966	0.942323	-5.43327
ENSRNOG00000004473	Ppargc1a	83516	-0.0785343	12.3317	-0.886691	0.387938	0.887428	-5.20632
ENSRNOG00000004474	Klhdc2	299113	0.0692558	13.2569	0.989983	0.336424	0.86998	-5.12378
ENSRNOG00000004476	Wif1	114557	0.0469094	9.31651	0.261894	0.796632	0.968428	-5.5214
ENSRNOG00000004477	Ublcp1	360514	0.00178692	13.3162	0.0156778	0.987679	0.998044	-5.55222
ENSRNOG00000004479	Aurka	261730	0.0343468	12.036	0.307666	0.762171	0.963675	-5.50969
ENSRNOG00000004483	Ptprr	94202	-0.123451	11.7075	-1.36368	0.190915	0.795427	-4.76208
ENSRNOG00000004484	LOC108348189	245974	0.0896995	11.4065	1.16241	0.261542	0.829646	-4.96865
ENSRNOG00000004488	Bdkrb1	81509	-0.400359	6.24593	-2.46698	0.0248631	0.626337	-3.26746
ENSRNOG00000004489	Adgre5	361383	0.169321	11.7958	1.43747	0.169207	0.788033	-4.67998
ENSRNOG00000004492	Mterf3	299514	0.000662288	10.126	0.005688	0.99553	0.999313	-5.55232
ENSRNOG00000004493	Tasp1	311468	-0.143752	10.9631	-1.59699	0.129167	0.753172	-4.49179
ENSRNOG00000004494	Lta4h	299732	-0.0649888	12.7299	-0.924008	0.368747	0.882511	-5.17743
ENSRNOG00000004496	Rock2	25537	0.0738049	13.654	0.73348	0.47352	0.91081	-5.31358
ENSRNOG00000004498	Scin	298975	0.0106656	6.3239	0.106453	0.916501	0.986293	-5.54721
ENSRNOG00000004499	Gpr135	314213	0.256877	8.70962	1.00738	0.328241	0.86998	-5.1091
ENSRNOG00000004500	Myc	24577	-0.232708	10.2047	-1.68555	0.110626	0.73597	-4.38142
ENSRNOG00000004502	Hal	29301	-0.708248	7.40655	-2.61122	0.0185251	0.600462	-3.04209
ENSRNOG00000004505	Nfic	29228	0.296192	14.0928	2.65771	0.0168338	0.581376	-2.96859
ENSRNOG00000004510	Slc35b1	287642	-0.045043	14.8684	-0.715971	0.483981	0.913743	-5.32465
ENSRNOG00000004512	Apool	317191	-0.0894507	11.0274	-1.30151	0.210894	0.806236	-4.82866
ENSRNOG00000004515	Pes1	289740	-0.0228326	13.7844	-0.350725	0.730215	0.960944	-5.49697
ENSRNOG00000004516	Itgbl1	498564	0.0950189	10.4421	0.228675	0.821921	0.972579	-5.52874
ENSRNOG00000004517	Igf1	24482	-0.0463619	10.6511	-0.309556	0.760759	0.963675	-5.50916
ENSRNOG00000004518	Cacnb1	50688	0.0562567	14.0932	0.43323	0.670436	0.951969	-5.46804
ENSRNOG00000004524	Desi2	289277	0.0298879	12.2019	0.312659	0.758441	0.963675	-5.50829
ENSRNOG00000004527	Lin7a	85327	-0.0692242	12.551	-0.437509	0.667393	0.951969	-5.46638
ENSRNOG00000004532	Dipk1b	362090	0.0501605	12.189	0.833947	0.416175	0.898931	-5.24533
ENSRNOG00000004534	Spdya	192209	0.253695	9.04545	1.50637	0.150803	0.775493	-4.60043
ENSRNOG00000004535	Kcng3	171011	-0.602805	10.7968	-2.63655	0.0175844	0.589063	-3.00209
ENSRNOG00000004537	Rxrg	83574	-0.922545	13.3912	-2.19372	0.0428338	0.661	-3.68074
ENSRNOG00000004544	Ube2e3	295686	-0.157194	14.0323	-2.21403	0.0411656	0.657095	-3.65075
ENSRNOG00000004549	Dhx40	287595	-0.154876	12.6231	-1.622	0.123679	0.745214	-4.46102
ENSRNOG00000004554	Dcn	29139	0.0652166	11.0714	0.241097	0.812439	0.970568	-5.52611
ENSRNOG00000004560	Cacna1b	257648	0.139448	12.6372	1.73509	0.10129	0.729676	-4.31797
ENSRNOG00000004572	Zfp472	314587	0.0160838	8.39105	0.0789526	0.938016	0.989504	-5.54952
ENSRNOG00000004575	Il1a	24493	0.0937505	6.67381	0.395683	0.697389	0.956152	-5.48194
ENSRNOG00000004577	Fez2	94269	-0.0474226	12.8446	-0.39693	0.696487	0.956152	-5.4815
ENSRNOG00000004578	Cthrc1	282836	0.253109	7.20454	1.35947	0.192217	0.795427	-4.76666
ENSRNOG00000004581	Zdhhc9	302808	-0.0874146	14.1897	-0.760253	0.457788	0.909369	-5.29618
ENSRNOG00000004583	Mb	59108	0.0602266	8.01471	0.215772	0.8318	0.975842	-5.53132
ENSRNOG00000004610	Lum	81682	-0.0332482	10.3833	-0.15991	0.874885	0.981519	-5.54078
ENSRNOG00000004612	Ppp1cb	25594	-0.0629039	14.4137	-0.895582	0.383306	0.886961	-5.19953
ENSRNOG00000004613	Gpm6b	192179	-0.114965	15.4463	-2.06486	0.0549552	0.669061	-3.8679
ENSRNOG00000004616	Npm1	25498	-0.0884064	13.8406	-1.35081	0.19492	0.796972	-4.77605
ENSRNOG00000004621	Rtn4	83765	0.121116	12.9484	1.05276	0.307566	0.861896	-5.06975
ENSRNOG00000004624	Rnd3	295588	-0.0792279	12.706	-0.582728	0.567925	0.931096	-5.40062
ENSRNOG00000004626	Slc34a2	84395	0.0179647	7.10225	0.086027	0.932476	0.988917	-5.54899
ENSRNOG00000004628	Dazap2	300235	0.0891831	14.2655	0.814552	0.426884	0.901831	-5.25913
ENSRNOG00000004632	Pmch	24659	-0.428962	7.94165	-1.62279	0.12351	0.745214	-4.46005
ENSRNOG00000004637	Fbxo7	366854	-0.0376917	13.6597	-0.594679	0.560094	0.929841	-5.39441
ENSRNOG00000004640	Mtfp1	289745	0.342732	11.1036	1.67856	0.112001	0.73597	-4.39028
ENSRNOG00000004641	Sstr4	25555	0.243962	10.8566	1.75665	0.0974444	0.729676	-4.28999
ENSRNOG00000004645	Galnt5	83627	0.13624	6.46304	0.587801	0.564594	0.930306	-5.398
ENSRNOG00000004646	Tpo	54314	0.0152854	7.7791	0.0806407	0.936694	0.989369	-5.54939
ENSRNOG00000004647	Il10	25325	0.00320782	6.96089	0.0118903	0.990655	0.998571	-5.55227
ENSRNOG00000004649	Il1b	24494	-0.0582574	7.05658	-0.309608	0.76072	0.963675	-5.50915
ENSRNOG00000004650	Begain	79146	0.417904	12.2107	2.02531	0.0592605	0.669061	-3.9242
ENSRNOG00000004659	Creld2	362978	-0.0312331	11.5914	-0.321171	0.752098	0.963675	-5.50587
ENSRNOG00000004666	Prr5l	362171	-0.0876059	9.50272	-0.377677	0.710466	0.956152	-5.48817
ENSRNOG00000004670	Ddx56	289780	-0.33838	11.6664	-2.89976	0.0101676	0.507423	-2.58069
ENSRNOG00000004672	Sec14l2	116486	0.0945848	12.7795	1.14907	0.266849	0.833828	-4.9814
ENSRNOG00000004673	Rbm43	311020	0.00255385	9.33031	0.0209737	0.983517	0.996572	-5.55213
ENSRNOG00000004676	Pak3	29433	-0.159009	13.4133	-1.56932	0.135477	0.760969	-4.52543
ENSRNOG00000004677	Zeb2	311071	0.26313	13.3771	2.78339	0.012971	0.554523	-2.76817
ENSRNOG00000004678	Itln1	498284	0.216882	7.54869	1.10263	0.28595	0.84398	-5.02482
ENSRNOG00000004687	Thbd	83580	-0.132854	9.9028	-0.482992	0.635423	0.947129	-5.44773
ENSRNOG00000004688	Rbfox2	362950	0.0239966	14.7147	0.321376	0.751945	0.963675	-5.50581
ENSRNOG00000004692	A1bg	140656	-0.285417	6.59354	-1.42943	0.17147	0.788895	-4.68908
ENSRNOG00000004696	Arhgap5	299012	0.00893966	13.1514	0.103051	0.91916	0.987139	-5.54753
ENSRNOG00000004697	Baalc	140720	0.206886	13.383	1.79933	0.0902093	0.72441	-4.23396
ENSRNOG00000004698	Cd244	64025	0.0171289	9.02672	0.141315	0.889325	0.983074	-5.54331
ENSRNOG00000004699	Fibin	499856	0.157548	10.2186	0.813122	0.427681	0.902914	-5.26013
ENSRNOG00000004703	Muc15	690914	0.497219	7.3276	2.15913	0.0458206	0.662765	-3.73153
ENSRNOG00000004708	Aard	246323	0.0457181	10.0221	0.288812	0.776308	0.965305	-5.51474
ENSRNOG00000004711	Mta1	64520	-0.0431824	14.4535	-0.528329	0.604278	0.941018	-5.42737
ENSRNOG00000004713	Kcnj16	29719	-0.255914	10.0848	-0.527125	0.605095	0.941173	-5.42793
ENSRNOG00000004720	Kcnj2	29712	-0.209722	6.22672	-0.972845	0.344623	0.874493	-5.13803
ENSRNOG00000004723	Fcf1	299198	-0.0566815	12.498	-0.642358	0.529432	0.924264	-5.36844
ENSRNOG00000004725	Cela1	24331	-0.0149548	6.63918	-0.163318	0.872244	0.981519	-5.54029
ENSRNOG00000004726	Mapkapk2	289014	0.0333147	12.9189	0.290665	0.774915	0.965049	-5.51426
ENSRNOG00000004737	Cd48	245962	0.139963	12.6788	0.614666	0.547126	0.926197	-5.38375
ENSRNOG00000004740	Mmadhc	362134	-0.0432358	13.2557	-0.490383	0.630295	0.947129	-5.44453
ENSRNOG00000004741	Rpl19	81767	0.0240268	14.87	0.27185	0.789097	0.966789	-5.51901
ENSRNOG00000004742	Chp1	64152	-0.0786921	14.8182	-0.873512	0.394871	0.887716	-5.21627
ENSRNOG00000004749	Slc30a1	58976	-0.147609	12.0505	-2.13033	0.0484517	0.663657	-3.77351
ENSRNOG00000004752	Nalcn	266760	-0.263513	12.4574	-1.62023	0.124062	0.745214	-4.46322
ENSRNOG00000004754	Tc2n	500707	0.416072	6.81346	1.19803	0.247767	0.82711	-4.93403
ENSRNOG00000004755	Commd9	295956	0.135636	12.9514	1.51421	0.148819	0.773273	-4.59121
ENSRNOG00000004756	Syt2	24805	-0.016239	11.3368	-0.0716754	0.943719	0.990829	-5.55001
ENSRNOG00000004757	Tmem158	117582	-0.43078	12.9956	-1.3185	0.205277	0.803166	-4.81071
ENSRNOG00000004763	Sirpa	25528	-0.112664	15.0385	-1.29084	0.214485	0.807085	-4.83985
ENSRNOG00000004772	Cytip	311047	-0.332986	8.151	-0.675795	0.508497	0.920645	-5.3491
ENSRNOG00000004775	Cstf1	311670	-0.103966	12.7031	-1.27927	0.218431	0.812591	-4.85189
ENSRNOG00000004778	Cnga1	85259	0.0286207	6.36007	0.163235	0.872308	0.981519	-5.5403
ENSRNOG00000004781	Crmp1	25415	0.0256022	14.4069	0.282144	0.781328	0.965305	-5.51645
ENSRNOG00000004786	Cyp4f1	56266	0.227164	10.3469	1.69986	0.107854	0.731198	-4.36321
ENSRNOG00000004789	Utp25	305076	-0.20379	11.7224	-2.16867	0.0449781	0.661862	-3.71756
ENSRNOG00000004791	Arf6	79121	0.089415	12.7476	1.18891	0.251238	0.828093	-4.94297
ENSRNOG00000004793	Ncln	314648	0.10448	12.6457	1.10641	0.284359	0.841512	-5.02134
ENSRNOG00000004794	Rtn1	116644	-0.0151248	15.4174	-0.200782	0.843313	0.978066	-5.53414
ENSRNOG00000004806	Strn	29149	-0.480671	13.728	-2.15807	0.045915	0.66301	-3.73308
ENSRNOG00000004807	Arf2	79119	-0.00942172	12.16	-0.110267	0.913523	0.986205	-5.54684
ENSRNOG00000004808	Cst11	245916	-0.244712	6.14322	-1.22785	0.236667	0.82062	-4.90439
ENSRNOG00000004810	Plcb1	24654	-0.125694	14.118	-1.32373	0.20357	0.802879	-4.80514
ENSRNOG00000004813	Rtcb	362855	-0.0405513	13.5829	-0.810412	0.429193	0.903827	-5.26204
ENSRNOG00000004814	Elob	81807	0.160053	13.9653	1.42645	0.172315	0.788895	-4.69244
ENSRNOG00000004820	Sar1b	287276	0.103017	13.5961	1.55433	0.139002	0.763516	-4.54349
ENSRNOG00000004828	Acvr1c	245921	-0.544994	13.4247	-2.71131	0.0150677	0.556372	-2.88342
ENSRNOG00000004839	B4galnt1	64828	0.0227574	14.1814	0.284236	0.779752	0.965305	-5.51592
ENSRNOG00000004841	Akap6	64553	-0.0370093	12.5581	-0.253963	0.80265	0.969305	-5.52324
ENSRNOG00000004846	Atp6v1c1	299971	-0.00694615	14.9377	-0.0976277	0.923399	0.987193	-5.54803
ENSRNOG00000004852	Sel1l2	311470	-0.146836	5.99917	-1.65385	0.116981	0.741641	-4.42139
ENSRNOG00000004854	Has2	25694	0.0807524	8.39931	0.613436	0.54792	0.926845	-5.38442
ENSRNOG00000004858	LOC257643	257643	0.0278314	6.75338	0.159216	0.875424	0.981519	-5.54088
ENSRNOG00000004860	Myh9	25745	0.0536276	13.8107	0.449332	0.659016	0.95077	-5.4617
ENSRNOG00000004863	Mpped2	362185	-0.121349	13.3336	-1.21572	0.241135	0.824598	-4.91651
ENSRNOG00000004870	Dyrk3	304775	0.123028	10.9529	0.625552	0.540132	0.924835	-5.37781
ENSRNOG00000004873	Prkch	81749	-0.835107	10.9704	-2.74848	0.0139488	0.556372	-2.82408
ENSRNOG00000004875	Ccer1	500825	0.0350074	6.35249	0.192705	0.849532	0.978066	-5.53557
ENSRNOG00000004878	Myf6	25714	0.0994186	6.33942	0.572773	0.574492	0.932563	-5.4057
ENSRNOG00000004882	Capn6	83685	-0.221614	10.0007	-1.92308	0.0718345	0.687034	-4.06693
ENSRNOG00000004888	Spred2	305539	-0.0115858	10.8626	-0.0666078	0.947691	0.991805	-5.55033
ENSRNOG00000004890	Adcy8	29241	0.291933	10.0293	1.30876	0.208484	0.805482	-4.82103
ENSRNOG00000004891	Arl14ep	311279	-0.248807	11.8015	-2.64014	0.017455	0.589063	-2.99642
ENSRNOG00000004893	Dmac2l	362749	-0.0454277	9.83076	-0.281915	0.7815	0.965305	-5.51651
ENSRNOG00000004898	Fshb	25447	-0.0919992	6.21694	-0.470549	0.644099	0.948183	-5.45301
ENSRNOG00000004899	Kcns3	83588	0.339645	10.7905	1.31661	0.205895	0.803166	-4.81271
ENSRNOG00000004900	Crhr1	58959	0.0796887	10.7188	0.397788	0.695866	0.956152	-5.4812
ENSRNOG00000004903	Ebp	117278	0.0177403	11.1457	0.147026	0.884886	0.982724	-5.54257
ENSRNOG00000004904	Pa2g4	288778	-0.0655843	14.0514	-1.13132	0.274035	0.836408	-4.99817
ENSRNOG00000004909	Cnot2	299805	-0.0594181	14.096	-0.610269	0.549965	0.92747	-5.38613
ENSRNOG00000004910	Eif2d	498225	0.00749784	11.8138	0.0986747	0.922581	0.987193	-5.54793
ENSRNOG00000004918	Kcna4	25469	-0.410547	12.7702	-2.22569	0.040235	0.655822	-3.63348
ENSRNOG00000004920	Olr750	296003	0.0886597	6.02211	0.684372	0.503204	0.918701	-5.34399
ENSRNOG00000004925	Ppp1r12a	116670	-0.194182	12.8636	-3.42613	0.00332152	0.42837	-1.72033
ENSRNOG00000004926	Mettl15	295985	-0.111098	9.67835	-0.89294	0.384678	0.887365	-5.20156
ENSRNOG00000004936	Sdc2	25615	-0.288157	13.9139	-2.24949	0.0383956	0.655822	-3.59808
ENSRNOG00000004938	Olr758	296010	0.0661473	5.79149	0.481387	0.636539	0.947129	-5.44842
ENSRNOG00000004946	Cst12	266776	0.253142	6.0526	1.12272	0.277566	0.836408	-5.00622
ENSRNOG00000004958	Slc22a22	299944	-0.156385	6.15124	-1.20465	0.245268	0.825527	-4.9275
ENSRNOG00000004959	Actr2	289820	-0.032838	15.2736	-0.50179	0.622419	0.944208	-5.4395
ENSRNOG00000004962	Prdm4	170820	-0.0932029	11.8283	-0.957644	0.352012	0.877645	-5.15048
ENSRNOG00000004964	Erbb3	29496	0.118749	11.9475	0.688507	0.500663	0.917506	-5.34151
ENSRNOG00000004972	Upp1	289801	-0.0493354	10.6333	-0.387071	0.703631	0.956152	-5.48496
ENSRNOG00000004978	Prkacb	293508	-0.104235	15.2615	-1.40079	0.179732	0.790701	-4.7212
ENSRNOG00000004989	Cst8	29679	0.188017	8.12914	1.55713	0.138337	0.763516	-4.54012
ENSRNOG00000004992	Rab1a	81754	-0.0708769	14.7873	-0.962616	0.349583	0.876737	-5.14643
ENSRNOG00000004993	Olr778	404796	0.145701	6.38329	0.953303	0.354141	0.878927	-5.15401
ENSRNOG00000004996	Zcrb1	362990	0.0829836	12.7012	1.17121	0.258086	0.828609	-4.96018
ENSRNOG00000004998	Jakmip1	305434	-0.140641	14.2383	-1.96284	0.066684	0.673727	-4.0119
ENSRNOG00000005003	Ptprn2	29714	0.0235719	14.0971	0.247895	0.807262	0.96943	-5.52461
ENSRNOG00000005007	Scn3a	497770	-0.330002	12.0107	-2.28357	0.0358968	0.651599	-3.54711
ENSRNOG00000005012	Utp14a	317579	0.0383743	10.4065	0.445185	0.661949	0.951545	-5.46336
ENSRNOG00000005015	Rabep1	54190	-0.0384242	13.235	-0.418852	0.680705	0.951969	-5.47351
ENSRNOG00000005018	Scn2a	24766	0.156193	14.3015	2.0871	0.0526621	0.669061	-3.83601
ENSRNOG00000005021	Orc4	295596	-0.0998327	11.4285	-1.25827	0.225742	0.817197	-4.87354
ENSRNOG00000005024	Cdkn2aipnl	287278	0.0269486	10.3341	0.344229	0.735006	0.961281	-5.49899
ENSRNOG00000005031	Surf6	303076	0.0368894	12.1527	0.575336	0.572797	0.932297	-5.4044
ENSRNOG00000005033	Acvr1	79558	-0.00083642	12.7448	-0.00681183	0.994646	0.999313	-5.55231
ENSRNOG00000005034	Arhgef25	314904	0.15709	13.9329	1.78434	0.0926945	0.72456	-4.25373
ENSRNOG00000005039	Tfpi	29436	0.13115	12.1149	0.808206	0.430427	0.903906	-5.26358
ENSRNOG00000005041	Crip2	338401	-0.0991554	14.7429	-0.919554	0.371003	0.882599	-5.18093
ENSRNOG00000005046	Tspan13	366602	-0.328869	13.4189	-1.88048	0.077744	0.698295	-4.12516
ENSRNOG00000005048	Trhr	25570	-0.409308	7.58708	-1.37186	0.188402	0.795427	-4.75314
ENSRNOG00000005052	Slc39a9	314275	0.0279978	11.3271	0.249199	0.806271	0.96943	-5.52432
ENSRNOG00000005053	Egln3	54702	-0.156594	10.6175	-0.962562	0.34961	0.876737	-5.14647
ENSRNOG00000005061	Dlst	299201	-0.0789201	14.2049	-1.50436	0.151316	0.77566	-4.60279
ENSRNOG00000005063	Atl1	362750	-0.154112	14.5689	-2.18449	0.0436129	0.661	-3.69433
ENSRNOG00000005064	Ube2b	81816	-0.0556506	13.4899	-0.966854	0.347522	0.876113	-5.14296
ENSRNOG00000005067	Zfp36l2	298765	0.0416401	12.1809	0.227956	0.822471	0.972748	-5.52889
ENSRNOG00000005074	Arl6ip6	499798	-0.0327841	11.3432	-0.351713	0.729488	0.960944	-5.49666
ENSRNOG00000005081	Fbxl20	64039	-0.0931217	12.121	-1.47874	0.157975	0.786967	-4.63266
ENSRNOG00000005083	Rtfdc1	296410	-0.0267512	13.4241	-0.296669	0.770406	0.965049	-5.51267
ENSRNOG00000005096	Bzw2	171439	-0.0557143	12.2632	-0.620251	0.543532	0.92568	-5.38072
ENSRNOG00000005108	Wfs1	83725	-0.292574	14.2508	-1.35952	0.192203	0.795427	-4.76661
ENSRNOG00000005109	Rprm	680110	0.00815483	11.5079	0.0264199	0.979238	0.994841	-5.55202
ENSRNOG00000005126	Pqlc3	298906	0.079062	8.88846	0.434886	0.669258	0.951969	-5.4674
ENSRNOG00000005130	Ogdh	360975	0.0175249	14.2576	0.329308	0.74605	0.963544	-5.5035
ENSRNOG00000005132	Slc52a3	311536	-0.0488767	10.7963	-0.37928	0.709298	0.956152	-5.48763
ENSRNOG00000005133	Mapt	29477	-0.0236849	14.8799	-0.354198	0.727659	0.960944	-5.49587
ENSRNOG00000005138	Pip4k2c	140607	0.0796086	12.8171	0.395573	0.697468	0.956152	-5.48198
ENSRNOG00000005144	Tmem18	362722	-0.0145793	11.025	-0.150298	0.882344	0.982425	-5.54213
ENSRNOG00000005149	Sacm1l	116482	-0.0880493	12.0594	-0.861388	0.401322	0.892701	-5.2253
ENSRNOG00000005151	Dync2li1	298767	-0.198851	11.5719	-2.70498	0.0152665	0.556372	-2.89349
ENSRNOG00000005157	Rbbp7	83712	-0.0423881	14.4053	-0.7169	0.483422	0.913743	-5.32407
ENSRNOG00000005167	LOC100912042	619345	0.040586	12.9364	0.651746	0.523506	0.923857	-5.3631
ENSRNOG00000005185	Nxph3	59315	0.433385	11.5551	1.54904	0.140265	0.766122	-4.54984
ENSRNOG00000005191	Trim44	362172	-0.129463	14.2169	-1.56691	0.136038	0.761572	-4.52834
ENSRNOG00000005195	Cst3	25307	-0.0181918	15.6461	-0.221702	0.827256	0.97471	-5.53015
ENSRNOG00000005206	Kcnq3	29682	-0.0834581	14.05	-0.961405	0.350174	0.877459	-5.14742
ENSRNOG00000005209	Spred1	296072	-0.197818	11.2027	-1.37989	0.185963	0.793598	-4.74432
ENSRNOG00000005214	Plek	364206	0.0303693	10.4094	0.134945	0.894282	0.984635	-5.54411
ENSRNOG00000005223	Hnmt	81676	-0.274694	10.8648	-2.40603	0.0281164	0.637825	-3.36133
ENSRNOG00000005229	Sec16b	89868	0.191803	9.01358	1.25483	0.226957	0.817197	-4.87706
ENSRNOG00000005233	Lrrc6	299920	-0.167701	9.78553	-1.05872	0.304922	0.860035	-5.06448
ENSRNOG00000005246	Tfap2c	362280	0.488879	7.42684	1.40955	0.177171	0.790671	-4.71142
ENSRNOG00000005247	LOC100912008	64463	0.0360957	12.4943	0.493335	0.628252	0.946679	-5.44324
ENSRNOG00000005248	Slc1a4	305540	-0.0588592	14.0841	-0.60784	0.551537	0.927471	-5.38743
ENSRNOG00000005250	Abcg5	114628	-0.0480722	7.59805	-0.327705	0.74724	0.963544	-5.50397
ENSRNOG00000005256	Zc3h15	362154	-0.0888472	13.5657	-1.05556	0.306322	0.861063	-5.06728
ENSRNOG00000005260	Acp1	24161	0.103441	12.2586	1.37404	0.187738	0.795342	-4.75075
ENSRNOG00000005264	Sav1	299116	-0.128476	11.1796	-1.26475	0.223466	0.817197	-4.86689
ENSRNOG00000005268	Gnat3	286924	0.293537	6.44326	2.1187	0.049553	0.663657	-3.79039
ENSRNOG00000005270	Sycp3	25561	0.287189	8.21562	1.27608	0.21953	0.813775	-4.8552
ENSRNOG00000005271	Rapgef5	362799	0.00210026	12.9159	0.0266218	0.979079	0.994841	-5.55201
ENSRNOG00000005274	Vrk1	362779	-0.127281	10.3085	-1.06552	0.301926	0.856536	-5.05843
ENSRNOG00000005275	Shmt1	287379	-0.0425192	8.90643	-0.334329	0.742327	0.962982	-5.502
ENSRNOG00000005276	Csnk2a1	116549	-0.58359	13.8934	-3.06385	0.0071918	0.48895	-2.314
ENSRNOG00000005277	Ptprv	64576	-0.363556	9.83179	-1.11526	0.280657	0.837916	-5.01315
ENSRNOG00000005279	Ndufaf7	298748	-0.00587896	12.4368	-0.0711446	0.944135	0.991024	-5.55005
ENSRNOG00000005284	Itpka	81677	0.096521	14.6403	0.883415	0.389654	0.887428	-5.20881
ENSRNOG00000005290	Ywhae	29753	-0.0378871	15.4128	-0.553683	0.587192	0.935352	-5.41521
ENSRNOG00000005291	Slc38a1	170567	-0.152184	12.3642	-1.36692	0.189917	0.795427	-4.75854
ENSRNOG00000005298	Zfp513	313913	-0.0122108	13.1182	-0.124832	0.902159	0.986205	-5.54529
ENSRNOG00000005299	Kif5a	314906	-0.0270816	15.1119	-0.419161	0.680484	0.951969	-5.4734
ENSRNOG00000005301	Eif2b4	117019	-0.00510682	13.1942	-0.062021	0.951288	0.992177	-5.55059
ENSRNOG00000005307	Slc4a10	295645	0.0353645	14.1784	0.306448	0.763082	0.963675	-5.51002
ENSRNOG00000005308	Tmx2	295701	-0.0378528	14.8505	-0.775999	0.448688	0.909036	-5.28568
ENSRNOG00000005309	Scn8a	29710	0.0546292	12.5773	0.313882	0.757529	0.963675	-5.50795
ENSRNOG00000005326	Cnrip1	364208	0.0356986	14.2885	0.382762	0.706763	0.956152	-5.48644
ENSRNOG00000005330	Crebbp	54244	-0.071035	10.1224	-0.285956	0.778457	0.965305	-5.51548
ENSRNOG00000005331	Vapb	60431	0.0171836	12.8974	0.267899	0.792085	0.967745	-5.51997
ENSRNOG00000005333	Azin1	58961	0.0293045	13.4077	0.317166	0.75508	0.963675	-5.50702
ENSRNOG00000005334	Acvr2a	29263	-0.317449	11.8327	-1.86565	0.0799009	0.702194	-4.14526
ENSRNOG00000005335	Galnt13	311039	-0.669031	11.2169	-4.18992	0.000646953	0.386669	-0.48107
ENSRNOG00000005336	Prss27	287108	-0.264833	6.59211	-2.64105	0.0174224	0.589063	-2.99498
ENSRNOG00000005338	Drd5	25195	-0.260905	8.33347	-0.951958	0.354803	0.878927	-5.1551
ENSRNOG00000005342	Rassf5	54355	0.122554	12.4877	0.429787	0.672889	0.951969	-5.46937
ENSRNOG00000005343	Esr2	25149	-0.292907	7.2892	-2.09384	0.0519839	0.669061	-3.8263
ENSRNOG00000005344	Nol10	313981	-0.13416	11.6215	-1.09011	0.291268	0.84956	-5.03626
ENSRNOG00000005345	Vsnl1	24877	0.0677576	14.9633	0.729404	0.475943	0.911719	-5.31618
ENSRNOG00000005355	Ncstn	289231	-0.0465112	13.4204	-0.674007	0.509604	0.920645	-5.35016
ENSRNOG00000005358	Pmm1	300089	-0.0132677	14.4129	-0.236947	0.815603	0.971703	-5.527
ENSRNOG00000005360	Dhrs7b	287380	0.0555528	12.1628	0.753493	0.46173	0.909369	-5.30063
ENSRNOG00000005362	Rab3ip	29885	-0.0327297	11.8649	-0.35653	0.725945	0.96067	-5.49513
ENSRNOG00000005365	Kcnip1	65023	-0.297946	7.79305	-1.14592	0.268112	0.833828	-4.98439
ENSRNOG00000005368	Ppp3r2	29749	0.222066	6.32182	1.00182	0.330841	0.86998	-5.11381
ENSRNOG00000005369	Kcnj3	50599	0.650912	11.9544	2.57638	0.0198976	0.606814	-3.09691
ENSRNOG00000005374	Lyar	289707	-0.0627668	10.8469	-0.528428	0.604211	0.941018	-5.42732
ENSRNOG00000005378	Gna15	89788	0.23301	10.9434	0.909415	0.376174	0.883827	-5.18885
ENSRNOG00000005379	Prp2	362450	-0.115557	7.60299	-0.710186	0.487467	0.915878	-5.32825
ENSRNOG00000005386	Kitlg	60427	-0.0415201	11.0133	-0.279167	0.783572	0.965607	-5.5172
ENSRNOG00000005389	Ppp2ca	24672	0.00180608	15.1479	0.0315073	0.975241	0.994841	-5.55188
ENSRNOG00000005390	Nup210	58958	-0.215311	11.2468	-2.03891	0.057747	0.669061	-3.90491
ENSRNOG00000005392	Ngfr	24596	-0.493893	7.29073	-1.46729	0.161027	0.786967	-4.64589
ENSRNOG00000005393	Sertad2	498423	-0.107722	12.3008	-0.88332	0.389704	0.887428	-5.20888
ENSRNOG00000005397	Maea	298982	-0.0743638	13.4601	-1.4019	0.179406	0.790701	-4.71996
ENSRNOG00000005398	Olr810	405330	0.136249	6.19884	0.984958	0.338814	0.871743	-5.12798
ENSRNOG00000005403	Olr811	405138	0.103266	7.2816	0.504617	0.620474	0.943731	-5.43824
ENSRNOG00000005404	Rasgrp1	29434	-0.0943466	14.5797	-0.673579	0.509869	0.920645	-5.35041
ENSRNOG00000005406	Clint1	360515	-0.191149	13.6879	-2.2069	0.0417445	0.657095	-3.6613
ENSRNOG00000005407	Olr812	405137	-0.169581	7.16089	-0.772475	0.450715	0.909036	-5.28805
ENSRNOG00000005410	Cdca7l	619566	-0.224933	7.24442	-1.5886	0.131053	0.756364	-4.50203
ENSRNOG00000005412	Olr813	405136	-0.160633	6.45866	-1.12258	0.277626	0.836408	-5.00635
ENSRNOG00000005413	Creb3l1	362165	0.0653951	12.2076	0.34507	0.734384	0.961281	-5.49873
ENSRNOG00000005418	Trap1	287069	-0.00211894	13.6545	-0.0306695	0.9759	0.994841	-5.55191
ENSRNOG00000005420	Abcg8	155192	-0.289074	6.73085	-2.11003	0.0503889	0.668022	-3.80294
ENSRNOG00000005424	Odc1	24609	0.066176	12.0187	0.856881	0.403737	0.89352	-5.22863
ENSRNOG00000005426	Snupn	316108	-0.122143	11.384	-1.73788	0.100784	0.729676	-4.31436
ENSRNOG00000005428	Ctbp1	29382	0.00137984	14.9177	0.0188693	0.985171	0.997241	-5.55217
ENSRNOG00000005431	Olr816	405134	-0.086424	5.66192	-0.385873	0.704502	0.956152	-5.48537
ENSRNOG00000005434	Sptbn1	305614	0.0516269	15.0371	0.870727	0.396347	0.889354	-5.21835
ENSRNOG00000005437	Rida	65151	0.0256161	12.7325	0.30022	0.767744	0.964435	-5.51172
ENSRNOG00000005438	Pcsk2	25121	0.0298459	14.9137	0.270703	0.789963	0.967095	-5.51929
ENSRNOG00000005446	Gna11	81662	0.0277039	12.8032	0.240196	0.813126	0.971024	-5.52631
ENSRNOG00000005457	Lamp5	362220	-0.212919	14.3134	-1.01803	0.323304	0.869319	-5.1
ENSRNOG00000005465	Kcnmb1	29747	-0.189155	8.76942	-1.4559	0.164112	0.788033	-4.65897
ENSRNOG00000005469	Olr819	405132	0.198461	7.69681	1.20182	0.246334	0.826373	-4.93029
ENSRNOG00000005470	Atxn3	60331	-0.360494	10.3843	-4.99814	0.000118652	0.282748	0.760153
ENSRNOG00000005472	Sp4	25162	-0.335509	12.0763	-2.93302	0.00948085	0.503414	-2.52683
ENSRNOG00000005478	Fkbp9	297123	0.0774888	13.3021	0.503993	0.620903	0.943781	-5.43852
ENSRNOG00000005480	Ybx3	83807	-0.029783	13.0798	-0.28212	0.781346	0.965305	-5.51646
ENSRNOG00000005483	Rpap1	311338	0.0861264	11.3799	1.09836	0.287757	0.847358	-5.02873
ENSRNOG00000005492	Hpcal1	50871	-0.302255	14.1916	-2.03011	0.0587222	0.669061	-3.9174
ENSRNOG00000005496	Ing3	312154	-0.204617	12.6336	-2.74724	0.013985	0.556372	-2.82607
ENSRNOG00000005498	Gcg	24952	-0.115163	7.00936	-0.783384	0.444459	0.907183	-5.28068
ENSRNOG00000005524	Pno1	289809	-0.0432494	11.6548	-0.650986	0.523984	0.923857	-5.36354
ENSRNOG00000005539	Thg1l	303067	0.0915272	10.4188	0.968277	0.346832	0.875817	-5.14179
ENSRNOG00000005542	Apob	54225	-0.0179508	5.96609	-0.19833	0.8452	0.978066	-5.53458
ENSRNOG00000005551	Derl1	362912	-0.026077	12.9148	-0.304352	0.76465	0.963675	-5.5106
ENSRNOG00000005561	Brinp1	140610	0.117429	14.5656	1.13195	0.273777	0.836408	-4.99758
ENSRNOG00000005565	Traf3ip3	360900	0.134042	8.43122	0.778313	0.44736	0.908251	-5.28412
ENSRNOG00000005575	Abi3	303476	0.36824	8.39974	1.51476	0.148681	0.773273	-4.59057
ENSRNOG00000005577	Desi1	315160	-0.0603724	14.5958	-0.638479	0.531891	0.924666	-5.37062
ENSRNOG00000005578	Zbtb44	363035	-0.19692	9.80029	-1.78122	0.0932188	0.725312	-4.25783
ENSRNOG00000005580	Itgb4	25724	0.275631	9.99462	0.72666	0.477578	0.91226	-5.31792
ENSRNOG00000005587	Suclg1	114597	-0.0343426	14.5912	-0.512591	0.615005	0.942748	-5.43463
ENSRNOG00000005592	Brinp2	286895	0.0707561	13.712	0.607827	0.551545	0.927471	-5.38744
ENSRNOG00000005600	Nr4a2	54278	0.140658	11.9252	0.365729	0.719196	0.958105	-5.49215
ENSRNOG00000005602	Mthfd1	64300	-0.0855445	12.6465	-1.21646	0.240861	0.824598	-4.91578
ENSRNOG00000005609	Neurod1	29458	0.700801	10.0769	1.45181	0.165232	0.788033	-4.66365
ENSRNOG00000005610	Yipf4	362699	-0.0873762	13.0773	-0.775656	0.448885	0.909036	-5.28591
ENSRNOG00000005614	Txn2	79462	0.135228	13.5629	1.84164	0.0835052	0.712318	-4.17759
ENSRNOG00000005615	Gadd45a	25112	-0.236363	12.7738	-2.24356	0.0388465	0.655822	-3.60692
ENSRNOG00000005618	Fmc1	500087	0.0721756	11.7317	0.615066	0.546868	0.926197	-5.38354
ENSRNOG00000005620	Lcp2	155918	0.209408	8.90275	0.736736	0.471589	0.91081	-5.3115
ENSRNOG00000005639	Ar	24208	0.300768	9.78013	1.2013	0.246531	0.826373	-4.93081
ENSRNOG00000005646	Tas2r107	78981	-0.0950666	5.91746	-0.585251	0.566267	0.931057	-5.39932
ENSRNOG00000005650	Pgf	94203	0.34061	7.06249	1.55592	0.138626	0.763516	-4.54159
ENSRNOG00000005652	Cntn4	116658	-0.0893616	12.757	-0.796232	0.43716	0.904493	-5.27189
ENSRNOG00000005659	Aurkb	114592	0.0105662	9.85106	0.0184899	0.985469	0.997241	-5.55218
ENSRNOG00000005660	Fam110c	500638	0.218131	6.68494	2.1289	0.0485854	0.663657	-3.77558
ENSRNOG00000005662	Grm7	81672	-0.082271	13.5659	-0.921253	0.370142	0.882511	-5.1796
ENSRNOG00000005664	Tas2r105	78985	0.0237126	6.10024	0.17995	0.859375	0.978591	-5.53771
ENSRNOG00000005668	Ndufa8	296658	0.0642505	13.2556	0.751761	0.462743	0.909369	-5.30176
ENSRNOG00000005669	Car8	297814	-0.0674231	12.5791	-0.420592	0.679458	0.951969	-5.47286
ENSRNOG00000005679	Fap	192203	0.341876	9.0315	0.959014	0.351341	0.877645	-5.14937
ENSRNOG00000005687	Slc6a14	298340	-0.0758174	5.99513	-0.343175	0.735784	0.961779	-5.49932
ENSRNOG00000005690	Lmcd1	494021	-0.0512614	11.9998	-0.330623	0.745075	0.963544	-5.50311
ENSRNOG00000005691	Rnf32	311936	-0.1521	9.66421	-1.56264	0.137038	0.762549	-4.53349
ENSRNOG00000005692	Tas2r114	78982	0.0147573	5.53373	0.101606	0.920289	0.987139	-5.54767
ENSRNOG00000005695	Mgp	25333	0.0839177	12.7799	0.426851	0.674984	0.951969	-5.47049
ENSRNOG00000005697	Slc6a11	79213	0.0377034	14.152	0.258869	0.798926	0.968889	-5.52211
ENSRNOG00000005698	Ndufa5	25488	0.17041	13.5007	2.45614	0.0254142	0.626337	-3.28421
ENSRNOG00000005700	Nsg1	25247	-0.132889	15.2035	-1.17857	0.255224	0.828572	-4.95305
ENSRNOG00000005708	Mmp16	65205	-0.0642988	12.4264	-0.669762	0.512238	0.921429	-5.35266
ENSRNOG00000005713	Ccdc82	300359	-0.13211	11.6569	-1.44744	0.166436	0.788033	-4.66864
ENSRNOG00000005715	Lgr4	286994	-0.0882487	12.352	-1.25426	0.227157	0.817197	-4.87764
ENSRNOG00000005717	Tas2r121	78983	0.000646159	5.6045	0.00295583	0.997677	0.999481	-5.55233
ENSRNOG00000005726	Pclo	56768	-0.0308619	12.7986	-0.245898	0.808782	0.96943	-5.52506
ENSRNOG00000005727	Galnt3	366061	0.308243	7.30635	1.20183	0.246328	0.826373	-4.93028
ENSRNOG00000005731	Birc3	78971	0.147573	8.33699	0.548552	0.59063	0.937015	-5.41772
ENSRNOG00000005732	Tas2r13	78984	-0.133511	5.94173	-1.35181	0.194608	0.796912	-4.77498
ENSRNOG00000005742	Olr584	404861	0.047823	5.99766	0.444373	0.662523	0.951941	-5.46368
ENSRNOG00000005753	Alg13	300284	0.0530849	9.33996	0.308561	0.761503	0.963675	-5.50944
ENSRNOG00000005763	Arl1	64187	-0.0404637	13.8543	-0.450983	0.65785	0.949951	-5.46104
ENSRNOG00000005766	Tbc1d20	362237	-0.411542	11.2335	-2.54039	0.0214165	0.606814	-3.15329
ENSRNOG00000005770	Sostdc1	266803	1.24845	8.98657	2.06414	0.0550307	0.669061	-3.86893
ENSRNOG00000005793	Olr588	295822	-0.623221	6.61551	-1.97991	0.0645758	0.669061	-3.98808
ENSRNOG00000005794	Slc10a1	24777	-0.33348	6.48086	-1.99859	0.0623385	0.669061	-3.96189
ENSRNOG00000005796	Ctnna1	307505	0.0937629	13.6462	1.39373	0.181816	0.791307	-4.72903
ENSRNOG00000005798	Cav3	29161	0.561343	8.13041	1.66171	0.115377	0.740425	-4.41153
ENSRNOG00000005801	Stx17	252853	0.115174	9.22645	0.912046	0.374827	0.883065	-5.18681
ENSRNOG00000005804	Eif3d	362952	-0.0852043	13.7211	-1.05411	0.306967	0.861896	-5.06856
ENSRNOG00000005806	Oxtr	25342	-0.315787	7.62957	-1.27569	0.219664	0.813775	-4.8556
ENSRNOG00000005807	Ptpn7	246781	-1.04495	10.5025	-1.90361	0.074483	0.694009	-4.09363
ENSRNOG00000005809	Arhgdib	362456	-0.0225058	11.5952	-0.122555	0.903934	0.986205	-5.54555
ENSRNOG00000005825	Lyz2	25211	0.138826	11.3632	0.420235	0.679714	0.951969	-5.47299
ENSRNOG00000005828	Skp1	287280	-0.0254535	14.5028	-0.225008	0.824725	0.973282	-5.52949
ENSRNOG00000005841	Erp44	298066	-0.0125706	11.4164	-0.159314	0.875348	0.981519	-5.54087
ENSRNOG00000005849	Aco1	50655	0.0173475	12.9614	0.199924	0.843974	0.978066	-5.53429
ENSRNOG00000005853	Tacr1	24807	-0.875534	9.88231	-2.96633	0.00883841	0.503414	-2.47278
ENSRNOG00000005854	Angpt1	89807	-0.229146	8.80592	-1.15164	0.265821	0.833828	-4.97896
ENSRNOG00000005858	Kap	24937	0.505472	6.70057	2.91437	0.0098601	0.503414	-2.55704
ENSRNOG00000005861	Hsd11b1	25116	0.310116	13.642	2.16985	0.0448749	0.661862	-3.71583
ENSRNOG00000005863	Olr601	311175	0.1971	5.90258	1.26746	0.222519	0.817197	-4.8641
ENSRNOG00000005871	Il1rn	60582	0.164943	7.23436	1.19015	0.250765	0.828093	-4.94176
ENSRNOG00000005874	Tle2	299636	0.242014	10.094	1.86334	0.0802421	0.702194	-4.14839
ENSRNOG00000005877	Lrpprc	313867	-0.0341527	13.7222	-0.481506	0.636457	0.947129	-5.44837
ENSRNOG00000005880	Olr604	404855	-0.210931	6.19392	-1.53922	0.142633	0.766231	-4.56156
ENSRNOG00000005888	Fsip1	296074	-0.0979954	6.65519	-0.553483	0.587326	0.935352	-5.41531
ENSRNOG00000005890	Serbp1	246303	0.0050869	15.0388	0.089228	0.929971	0.988699	-5.54874
ENSRNOG00000005903	St14	114093	0.367034	10.0766	1.25863	0.225615	0.817197	-4.87317
ENSRNOG00000005904	Cdc27	360643	-0.0587766	10.3417	-0.436154	0.668356	0.951969	-5.46691
ENSRNOG00000005905	Pde4b	24626	-0.141522	14.1425	-1.71251	0.105455	0.729826	-4.34703
ENSRNOG00000005907	Rad18	362412	0.0683918	10.5362	0.433144	0.670498	0.951969	-5.46808
ENSRNOG00000005908	Dmtf1	114485	-0.132833	12.9979	-2.00491	0.0615977	0.669061	-3.953
ENSRNOG00000005911	Rln3	266997	0.0584367	7.68282	0.195675	0.847244	0.978066	-5.53505
ENSRNOG00000005916	Ppm1a	24666	-0.0538945	13.8044	-0.754333	0.461239	0.909369	-5.30008
ENSRNOG00000005917	Pawr	64513	-0.0393256	9.59972	-0.259005	0.798822	0.968889	-5.52208
ENSRNOG00000005921	Olr606	405246	0.266019	6.53353	1.42367	0.173106	0.788895	-4.69558
ENSRNOG00000005924	Dstn	296197	0.00773393	13.6828	0.114599	0.91014	0.986205	-5.5464
ENSRNOG00000005929	Them6	300015	0.147692	10.192	0.796019	0.43728	0.904493	-5.27204
ENSRNOG00000005931	Cpq	58952	-0.0199646	12.959	-0.204645	0.840343	0.978066	-5.53343
ENSRNOG00000005933	Yap1	363014	0.256886	8.46864	1.4283	0.17179	0.788895	-4.69036
ENSRNOG00000005935	A3galt2	171553	0.0536607	8.80331	0.228481	0.822069	0.972579	-5.52878
ENSRNOG00000005936	Foxm1	58921	-0.0109477	8.73636	-0.0768028	0.9397	0.989802	-5.54967
ENSRNOG00000005947	Pde6h	114248	-0.119103	9.06231	-0.394544	0.698213	0.956152	-5.48235
ENSRNOG00000005950	Olr608	404853	0.0127939	6.19324	0.0843314	0.933804	0.988917	-5.54912
ENSRNOG00000005954	Il5ra	114103	-0.155432	6.16747	-1.18095	0.254304	0.828572	-4.95074
ENSRNOG00000005957	Slc4a7	117955	-0.187337	10.276	-1.07966	0.295764	0.855021	-5.04574
ENSRNOG00000005963	Rab2a	65158	0.0325644	14.4903	0.515159	0.613248	0.942323	-5.43346
ENSRNOG00000005964	Nr4a3	58853	0.595343	8.77525	1.43934	0.168685	0.788033	-4.67786
ENSRNOG00000005970	Lrrc1	367113	-0.340223	10.3267	-1.92482	0.0716013	0.687034	-4.06453
ENSRNOG00000005975	Rpl30	64640	-0.0588048	14.9892	-1.00855	0.327696	0.86998	-5.1081
ENSRNOG00000005984	Etv6	312777	-0.311088	10.2697	-1.58697	0.131422	0.756364	-4.50401
ENSRNOG00000005985	Kcnma1	83731	0.00851938	13.8685	0.0855339	0.932862	0.988917	-5.54903
ENSRNOG00000005987	Suox	81805	-0.00614797	12.6228	-0.0653016	0.948715	0.992118	-5.55041
ENSRNOG00000005990	Wdsub1	362137	0.0444023	10.7835	0.393596	0.698899	0.956152	-5.48268
ENSRNOG00000005997	Olr1308	405079	0.0076385	6.33907	0.0611579	0.951965	0.992177	-5.55064
ENSRNOG00000005998	Smoc1	314280	0.0320556	11.384	0.338395	0.739316	0.962895	-5.50078
ENSRNOG00000006000	Cdk12	192350	0.0940836	11.0395	0.919815	0.370871	0.882599	-5.18073
ENSRNOG00000006010	Slc6a20	113918	0.0630577	12.4078	0.214681	0.832636	0.976161	-5.53153
ENSRNOG00000006019	G0s2	289388	0.262812	11.1856	2.53301	0.0217414	0.606814	-3.16482
ENSRNOG00000006024	Olr630	405947	-0.203578	6.9721	-1.1179	0.27956	0.837056	-5.0107
ENSRNOG00000006030	Ptprz1	25613	-0.089667	13.6239	-0.884699	0.38898	0.887428	-5.20783
ENSRNOG00000006033	Spon2	171569	-0.00216422	8.86425	-0.014561	0.988556	0.998109	-5.55224
ENSRNOG00000006035	LOC103693060	300615	-0.04148	6.6119	-0.33431	0.742341	0.962982	-5.50201
ENSRNOG00000006052	Sulf2	311642	0.109637	13.8925	1.17037	0.258414	0.828609	-4.96099
ENSRNOG00000006067	Aifm1	83533	-0.0802724	12.6093	-1.07011	0.299916	0.856126	-5.05432
ENSRNOG00000006069	Eif2ak3	29702	-0.0153356	12.0078	-0.160762	0.874225	0.981519	-5.54066
ENSRNOG00000006075	Fez1	81730	-0.00515232	14.2001	-0.0870507	0.931675	0.988917	-5.54891
ENSRNOG00000006082	Rmdn2	313840	-0.075656	10.1589	-0.55321	0.587509	0.935352	-5.41544
ENSRNOG00000006090	Ucn	29151	-0.120501	7.00485	-0.652008	0.523341	0.923857	-5.36295
ENSRNOG00000006094	Cd44	25406	-0.0864575	6.9468	-0.379334	0.709259	0.956152	-5.48761
ENSRNOG00000006104	Tg	24826	-0.10654	7.07256	-0.370966	0.715364	0.957301	-5.49042
ENSRNOG00000006116	Hk2	25059	-0.213355	10.3964	-0.868411	0.397577	0.890409	-5.22008
ENSRNOG00000006118	Klf10	81813	0.254445	12.3326	1.10406	0.28535	0.843658	-5.02351
ENSRNOG00000006120	Shh	29499	0.393757	7.01623	2.08044	0.0533396	0.669061	-3.84558
ENSRNOG00000006122	Igf2bp1	303477	-0.217469	7.354	-1.61691	0.124781	0.745238	-4.46732
ENSRNOG00000006126	Nup88	113929	-0.0904494	12.3473	-1.40682	0.177965	0.790701	-4.71447
ENSRNOG00000006130	Rab5b	288779	-0.0143929	13.5676	-0.201328	0.842894	0.978066	-5.53404
ENSRNOG00000006132	Fam71f1	500061	0.177866	6.76531	1.11192	0.282052	0.838726	-5.01625
ENSRNOG00000006136	Pdpk1	81745	-0.036994	13.7442	-0.679862	0.505983	0.919691	-5.34669
ENSRNOG00000006139	Stx18	360953	-0.0617886	13.4556	-0.643092	0.528967	0.924264	-5.36803
ENSRNOG00000006143	Ngly1	361014	-0.132907	11.9153	-1.7007	0.107694	0.730862	-4.36214
ENSRNOG00000006144	Cntn3	54279	-0.48793	11.9818	-4.15998	0.000689561	0.386669	-0.528728
ENSRNOG00000006146	Trim54	362708	-0.0364987	11.2509	-0.0724973	0.943074	0.990829	-5.54996
ENSRNOG00000006151	Reg3b	24618	0.295167	6.51749	1.48144	0.15726	0.786465	-4.62952
ENSRNOG00000006174	Grid2	79220	-0.450085	11.7925	-3.56974	0.00244128	0.414848	-1.4848
ENSRNOG00000006178	Dync1h1	29489	0.0143862	15.0183	0.241458	0.812164	0.970568	-5.52603
ENSRNOG00000006197	Calu	64366	0.0127499	12.3335	0.185756	0.854892	0.97849	-5.53675
ENSRNOG00000006199	Ispd	493574	-0.149016	9.71584	-1.5705	0.135202	0.760969	-4.524
ENSRNOG00000006200	St18	266680	-0.0630424	10.3582	-0.251519	0.804506	0.96943	-5.5238
ENSRNOG00000006204	Slc30a3	366568	0.452932	13.7537	1.33352	0.200408	0.802307	-4.79468
ENSRNOG00000006206	Tmem106b	312132	-0.0429967	13.4216	-0.619486	0.544024	0.92576	-5.38113
ENSRNOG00000006221	Uba3	117553	-0.0532847	13.4754	-0.939348	0.361049	0.881386	-5.16525
ENSRNOG00000006226	Cacng2	84347	0.118218	14.9206	1.26861	0.222119	0.817197	-4.86292
ENSRNOG00000006228	Pdia4	116598	-0.0591353	12.1839	-0.790782	0.440247	0.904493	-5.27564
ENSRNOG00000006231	Ptpro	50677	-0.25386	12.0576	-1.1326	0.273512	0.836408	-4.99697
ENSRNOG00000006235	Nell2	81734	0.0781125	14.4066	0.914082	0.373788	0.883065	-5.18522
ENSRNOG00000006236	Dsn1	499933	0.206313	6.99896	0.984064	0.33924	0.871743	-5.12873
ENSRNOG00000006241	2019-03-07	311059	-0.0416454	11.6128	-0.473591	0.641973	0.947854	-5.45173
ENSRNOG00000006244	Lztfl1	316102	-0.0880055	10.2181	-0.947381	0.357062	0.879885	-5.1588
ENSRNOG00000006268	Ifnb1	24481	-0.0705616	6.59773	-0.592699	0.561387	0.929987	-5.39545
ENSRNOG00000006280	Pcsk9	298296	0.11604	7.91593	0.939235	0.361105	0.881386	-5.16534
ENSRNOG00000006302	Gclc	25283	-0.0541992	13.4473	-0.826114	0.42048	0.899703	-5.25094
ENSRNOG00000006305	Slc38a2	29642	0.0856072	14.2739	0.911197	0.375262	0.883065	-5.18747
ENSRNOG00000006306	Gip	25040	0.13405	7.4151	0.76446	0.455346	0.909369	-5.29339
ENSRNOG00000006311	Ccr9	282832	0.109692	6.73202	0.764856	0.455116	0.909369	-5.29313
ENSRNOG00000006320	Ptges	59103	-0.140343	8.92898	-0.76184	0.456866	0.909369	-5.29513
ENSRNOG00000006324	Trpc6	89823	0.456989	10.4569	1.37532	0.187348	0.794984	-4.74934
ENSRNOG00000006328	Wwp1	297930	-0.0831832	12.7406	-0.905325	0.378273	0.884171	-5.19203
ENSRNOG00000006330	Elf3	304815	-0.034447	7.85364	-0.347158	0.732844	0.961281	-5.49808
ENSRNOG00000006331	Elovl5	171400	-0.0511378	14.1411	-0.495722	0.626603	0.946258	-5.44219
ENSRNOG00000006340	Memo1	298787	-0.048487	11.666	-0.706336	0.489796	0.916089	-5.33063
ENSRNOG00000006353	Large2	311202	-0.23109	8.25779	-0.940161	0.360644	0.881386	-5.1646
ENSRNOG00000006355	Akap8l	299569	0.107052	13.6307	1.51201	0.149373	0.773273	-4.5938
ENSRNOG00000006359	Galk1	287835	0.17557	11.5351	1.53565	0.143503	0.766231	-4.56582
ENSRNOG00000006360	Reg3a	171162	-0.0189963	6.34985	-0.106581	0.916402	0.986293	-5.5472
ENSRNOG00000006364	Dld	298942	0.0397757	13.4723	0.574951	0.573052	0.932297	-5.4046
ENSRNOG00000006368	Lrrn3	81514	-0.0878061	12.797	-0.788784	0.441382	0.904493	-5.27701
ENSRNOG00000006370	RGD1310852	314992	0.0970334	8.559	0.665349	0.514985	0.921432	-5.35524
ENSRNOG00000006375	Vdac1	83529	-0.0310621	15.0807	-0.491865	0.629269	0.947129	-5.44388
ENSRNOG00000006380	Srsf6	362264	-0.0534718	14.0154	-0.675511	0.508672	0.920645	-5.34927
ENSRNOG00000006388	Pygl	64035	-0.421259	11.0456	-2.71684	0.0148958	0.556372	-2.8746
ENSRNOG00000006392	Xrcc6	25019	-0.155274	12.3838	-1.56407	0.136703	0.761572	-4.53177
ENSRNOG00000006393	Sirt6	299638	0.102082	11.777	1.4158	0.175363	0.79005	-4.70443
ENSRNOG00000006394	Tbc1d10a	360968	0.00474893	12.9091	0.0538692	0.957684	0.992577	-5.55102
ENSRNOG00000006397	Chrm5	53949	-0.452833	7.61063	-1.08662	0.292766	0.851067	-5.03944
ENSRNOG00000006399	Synj2bp	64531	-0.0828383	12.7842	-0.959992	0.350863	0.877645	-5.14857
ENSRNOG00000006400	Tbc1d14	360956	-0.0531693	13.4345	-0.735677	0.472217	0.91081	-5.31218
ENSRNOG00000006408	Olr693	404821	0.242427	6.99594	1.58407	0.132082	0.757616	-4.50755
ENSRNOG00000006410	Akap5	171026	-0.702815	12.1417	-4.29465	0.000517764	0.386669	-0.315133
ENSRNOG00000006412	Zhx1	171159	-0.143705	12.9413	-2.53829	0.0215086	0.606814	-3.15657
ENSRNOG00000006415	Olr694	295896	0.437418	6.05689	2.91552	0.00983636	0.503414	-2.55518
ENSRNOG00000006426	Syt1	25716	-0.0366349	15.3144	-0.57863	0.570624	0.931208	-5.40272
ENSRNOG00000006428	Olr1121	315452	-0.033502	6.33032	-0.187404	0.853621	0.97849	-5.53648
ENSRNOG00000006432	Trnt1	312616	-0.0589574	11.3491	-0.613061	0.548162	0.92709	-5.38462
ENSRNOG00000006433	Olr696	405951	0.164341	5.93885	1.23877	0.232698	0.820604	-4.89338
ENSRNOG00000006435	Tor1b	311854	-0.061634	10.4942	-0.707938	0.488826	0.916089	-5.32964
ENSRNOG00000006439	Olr1122	405181	0.0730024	5.72373	0.580457	0.569419	0.931096	-5.40179
ENSRNOG00000006441	Zbtb25	314245	-0.119607	9.00064	-1.1291	0.274943	0.836408	-5.00026
ENSRNOG00000006445	Olr698	311179	-0.10931	6.47057	-0.603	0.554676	0.927471	-5.39001
ENSRNOG00000006450	Erbb2	24337	0.0485907	9.62899	0.359157	0.724015	0.959993	-5.49428
ENSRNOG00000006460	Amdhd2	302972	0.147606	9.68412	1.05289	0.307511	0.861896	-5.06964
ENSRNOG00000006462	Ero1a	171562	-0.109558	13.1095	-1.54029	0.142374	0.766231	-4.56029
ENSRNOG00000006467	Eif2b2	84005	-0.0552724	13.5092	-0.617096	0.545561	0.926142	-5.38244
ENSRNOG00000006469	Cdk2	362817	-0.0856368	10.8569	-0.643506	0.528705	0.924264	-5.36779
ENSRNOG00000006470	Camk1g	171358	-0.00166961	12.0812	-0.00907592	0.992867	0.999051	-5.5523
ENSRNOG00000006471	Pvalb	25269	0.515059	13.195	1.9003	0.0749429	0.695575	-4.09817
ENSRNOG00000006472	Hspa2	60460	0.172774	13.2219	1.2199	0.239585	0.822964	-4.91234
ENSRNOG00000006486	Reg1a	24714	-0.205592	6.11482	-1.86537	0.079942	0.702194	-4.14564
ENSRNOG00000006499	Cops5	312916	0.130287	13.087	1.76848	0.0953902	0.729676	-4.27455
ENSRNOG00000006500	Snf8	287645	-0.00968741	14.5164	-0.175203	0.863044	0.979141	-5.53847
ENSRNOG00000006508	Thnsl2	297332	-0.0124528	10.8406	-0.117313	0.908023	0.986205	-5.54612
ENSRNOG00000006513	Borcs6	497934	0.11915	10.7581	1.26112	0.224737	0.817197	-4.87062
ENSRNOG00000006514	Vezt	299738	-0.0649034	12.6759	-0.868259	0.397657	0.890409	-5.2202
ENSRNOG00000006527	Slc6a1	79212	-0.0139623	14.4075	-0.166519	0.869764	0.981447	-5.53981
ENSRNOG00000006532	H3f3b	117056	0.0721577	14.9301	1.04921	0.309148	0.862259	-5.07288
ENSRNOG00000006534	Crbn	297498	-0.09178	13.2119	-1.18761	0.25174	0.828093	-4.94425
ENSRNOG00000006539	Pex16	311203	-0.0363297	13.5402	-0.492254	0.629	0.947129	-5.44371
ENSRNOG00000006541	Nup107	116555	-0.102807	11.6302	-1.40676	0.177984	0.790701	-4.71454
ENSRNOG00000006542	Atp6v0c	170667	0.0897247	15.4658	1.45055	0.165577	0.788033	-4.66508
ENSRNOG00000006543	Bsnd	192675	-0.285763	6.50307	-1.7279	0.1026	0.729826	-4.32725
ENSRNOG00000006545	2019-09-07	64551	-0.110091	14.5182	-0.984627	0.338971	0.871743	-5.12826
ENSRNOG00000006548	Mrc2	498011	0.395936	9.42996	1.44666	0.16665	0.788033	-4.66952
ENSRNOG00000006554	Fam149b1	289900	0.13021	13.4305	1.41763	0.174836	0.79005	-4.70237
ENSRNOG00000006577	Olr1147	300408	-0.0322008	5.93217	-0.293637	0.772682	0.965049	-5.51347
ENSRNOG00000006578	Odf1	24610	0.0127082	6.43378	0.0997947	0.921705	0.987193	-5.54783
ENSRNOG00000006579	Reg3g	24620	0.26043	6.82112	1.36306	0.191107	0.795427	-4.76275
ENSRNOG00000006582	Aptx	259271	-0.222137	11.8564	-3.77692	0.0015651	0.397575	-1.14635
ENSRNOG00000006583	Hpgds	58962	0.0579627	7.85366	0.235253	0.816896	0.972262	-5.52736
ENSRNOG00000006584	Olr1148	405173	-0.15874	5.80205	-1.71183	0.105584	0.729826	-4.34791
ENSRNOG00000006588	Meox2	29279	-0.708606	8.42361	-1.50924	0.150074	0.773907	-4.59706
ENSRNOG00000006589	Mif	81683	0.280377	13.9737	2.32203	0.0332597	0.651599	-3.4892
ENSRNOG00000006593	Grpel1	79563	0.0609645	13.4394	0.935928	0.362755	0.881863	-5.16798
ENSRNOG00000006595	Htr3a	79246	-0.556043	10.9644	-2.99847	0.0082586	0.48895	-2.42052
ENSRNOG00000006604	Thy1	24832	0.0481621	15.6009	0.715649	0.484174	0.913762	-5.32485
ENSRNOG00000006611	Nostrin	311111	-0.196589	11.065	-1.14916	0.266812	0.833828	-4.98131
ENSRNOG00000006615	Mtap	298227	-0.120728	8.29435	-1.20166	0.246395	0.826373	-4.93045
ENSRNOG00000006622	Cry1	299691	-0.224782	11.9757	-2.07054	0.0543609	0.669061	-3.85977
ENSRNOG00000006623	Cd302	295629	0.178568	11.7511	1.32208	0.204109	0.802879	-4.8069
ENSRNOG00000006637	Olr720	405955	0.118251	6.06292	0.950933	0.355308	0.878927	-5.15593
ENSRNOG00000006639	Scn9a	78956	-0.394474	7.58831	-1.52649	0.145755	0.769715	-4.5767
ENSRNOG00000006641	Dbh	25699	-0.185267	7.36491	-1.18843	0.251424	0.828093	-4.94344
ENSRNOG00000006642	Yipf6	363476	-0.228144	13.1166	-3.5601	0.00249231	0.414848	-1.5006
ENSRNOG00000006649	Thrb	24831	-0.140501	12.3666	-0.640315	0.530726	0.924264	-5.36959
ENSRNOG00000006652	Ddx1	84474	0.0229093	14.5781	0.312865	0.758288	0.963675	-5.50824
ENSRNOG00000006653	Slc38a4	170573	0.234774	8.08148	0.770268	0.451987	0.909121	-5.28952
ENSRNOG00000006654	Olr721	295914	0.34934	5.96925	2.89061	0.010365	0.51168	-2.5955
ENSRNOG00000006655	Plrg1	60376	-0.143839	12.9158	-1.69052	0.109655	0.73597	-4.3751
ENSRNOG00000006663	Usp2	115771	0.153028	12.4132	1.63333	0.121261	0.745214	-4.44699
ENSRNOG00000006669	Olr722	366114	0.0856561	5.81901	1.14605	0.268063	0.833828	-4.98427
ENSRNOG00000006674	Rflnb	287534	0.318006	8.95968	1.68105	0.11151	0.73597	-4.38713
ENSRNOG00000006675	Fabp1	24360	0.0784266	6.08194	0.828578	0.419123	0.899703	-5.24918
ENSRNOG00000006681	Rdh10	353252	-0.197719	12.2861	-1.93588	0.070139	0.680127	-4.04929
ENSRNOG00000006695	Rbck1	60383	0.0721967	12.1058	0.771006	0.451562	0.909036	-5.28903
ENSRNOG00000006697	Pip4p2	362490	-0.0376726	13.7621	-0.633998	0.53474	0.924666	-5.37313
ENSRNOG00000006700	Wdyhv1	362914	-0.186634	12.0954	-1.80137	0.0898753	0.722337	-4.23126
ENSRNOG00000006705	Mkks	311456	-0.0860287	10.8463	-0.787953	0.441854	0.904608	-5.27757
ENSRNOG00000006706	Olr724	366115	-0.168521	6.62508	-0.947774	0.356867	0.879876	-5.15848
ENSRNOG00000006709	Pzp	252922	-0.368993	6.53759	-2.52718	0.0220012	0.606814	-3.17391
ENSRNOG00000006715	Ccr1	57301	0.117503	6.86166	0.45789	0.652981	0.949604	-5.45824
ENSRNOG00000006716	Olr725	311180	-0.463139	6.58743	-1.8874	0.0767554	0.697457	-4.11576
ENSRNOG00000006720	Rnpep	81761	-0.0171762	13.6249	-0.260745	0.797503	0.968773	-5.52167
ENSRNOG00000006731	Spc25	295661	0.226435	8.92541	0.861453	0.401287	0.892701	-5.22526
ENSRNOG00000006734	Olr1606	305711	0.1509	6.64873	1.13286	0.273406	0.836408	-4.99673
ENSRNOG00000006735	Cdkn2b	25164	-0.28874	7.34104	-1.98805	0.0635929	0.669061	-3.97669
ENSRNOG00000006736	Ccr3	117027	0.232712	8.48398	1.94519	0.0689277	0.675655	-4.03641
ENSRNOG00000006738	Fbxo32	171043	0.0667238	9.67957	0.262782	0.795959	0.968428	-5.52119
ENSRNOG00000006740	Castor1	360969	-0.163696	9.70352	-1.0098	0.327113	0.86998	-5.10703
ENSRNOG00000006746	Olr1607	364275	-0.161277	6.54098	-1.19422	0.249213	0.827834	-4.93777
ENSRNOG00000006747	Cc2d1a	288908	-0.0132461	13.1665	-0.161833	0.873395	0.981519	-5.54051
ENSRNOG00000006751	Psmd6	289924	-0.0190695	13.8487	-0.287974	0.776939	0.965305	-5.51496
ENSRNOG00000006756	Maged1	84469	-0.0572171	14.9905	-0.898938	0.381567	0.884972	-5.19696
ENSRNOG00000006762	Snu13	300092	-0.0248719	14.3769	-0.359145	0.724023	0.959993	-5.49429
ENSRNOG00000006766	Laptm4b	315047	0.197281	12.6954	2.31667	0.0336161	0.651599	-3.49729
ENSRNOG00000006771	Olr729	366116	0.16456	6.66617	0.65174	0.52351	0.923857	-5.36311
ENSRNOG00000006779	Crot	83842	-0.0604676	12.2902	-0.366425	0.718687	0.958105	-5.49192
ENSRNOG00000006784	Sema4f	29745	-0.153139	11.6122	-1.12557	0.276391	0.836408	-5.00356
ENSRNOG00000006785	Dcaf8	364050	-0.00766846	13.2583	-0.124195	0.902655	0.986205	-5.54536
ENSRNOG00000006787	Dhcr24	298298	0.0303559	14.2216	0.422128	0.678359	0.951969	-5.47228
ENSRNOG00000006789	Ddit3	29467	0.148704	12.229	1.22535	0.237583	0.82062	-4.9069
ENSRNOG00000006795	Apmap	366227	-0.101417	12.9021	-1.13911	0.270863	0.835556	-4.99084
ENSRNOG00000006800	Tmem246	362518	-0.00399975	13.5898	-0.0576566	0.954712	0.992526	-5.55083
ENSRNOG00000006802	Lrrn1	500280	0.0412286	13.0673	0.324619	0.749533	0.963544	-5.50487
ENSRNOG00000006807	Aldob	24190	0.16335	7.50272	0.996521	0.333332	0.86998	-5.11829
ENSRNOG00000006810	Lancl2	362375	-0.00951213	13.8932	-0.0979366	0.923158	0.987193	-5.548
ENSRNOG00000006818	Arl6ip5	66028	0.0209905	14.4521	0.39121	0.700628	0.956152	-5.48352
ENSRNOG00000006819	Olr731	295919	0.0283514	6.34385	0.186917	0.853996	0.97849	-5.53656
ENSRNOG00000006831	Pgr	25154	0.151008	12.3613	0.623183	0.54165	0.925554	-5.37911
ENSRNOG00000006832	Zdhhc5	362156	-0.0870803	14.214	-1.2491	0.228993	0.818992	-4.8829
ENSRNOG00000006839	Arl5a	117050	-0.138504	11.7617	-1.57407	0.134375	0.760969	-4.51969
ENSRNOG00000006844	Dnajc14	114481	-0.0717818	12.4459	-0.824856	0.421173	0.899703	-5.25184
ENSRNOG00000006853	Elavl2	286973	0.0934428	13.0786	0.801025	0.434457	0.904493	-5.26858
ENSRNOG00000006855	Padi4	29512	0.15018	6.59096	0.881272	0.390778	0.887428	-5.21043
ENSRNOG00000006858	Pyurf	502782	0.0246602	12.7307	0.239186	0.813895	0.971156	-5.52652
ENSRNOG00000006859	Insig1	64194	0.0801024	13.9639	0.828871	0.418961	0.899648	-5.24897
ENSRNOG00000006865	Laptm4a	298875	0.034829	14.8707	0.580708	0.569254	0.931096	-5.40166
ENSRNOG00000006868	Ube2z	303478	-0.0587045	14.0287	-0.882933	0.389907	0.887428	-5.20917
ENSRNOG00000006870	Mtdh	170910	0.12939	12.2957	1.48717	0.155757	0.783721	-4.62287
ENSRNOG00000006871	Slc25a14	85263	-0.187537	12.8235	-2.40044	0.028434	0.639004	-3.3699
ENSRNOG00000006873	Dnase1	25633	-0.181655	6.9405	-0.850864	0.406977	0.894261	-5.23305
ENSRNOG00000006874	Opn1sw	81644	0.203218	6.98133	1.0005	0.33146	0.86998	-5.11493
ENSRNOG00000006876	Msx1	81710	0.471824	8.52448	1.0045	0.329585	0.86998	-5.11154
ENSRNOG00000006877	Efnb1	25186	-0.132812	11.5228	-0.668906	0.51277	0.921432	-5.35316
ENSRNOG00000006878	Slc26a3	114629	-0.556827	6.82703	-2.75136	0.0138655	0.556372	-2.81947
ENSRNOG00000006889	Ambp	25377	0.448962	6.84967	1.65176	0.117411	0.741641	-4.424
ENSRNOG00000006894	Tor1a	266606	-0.0426824	11.9996	-0.59003	0.563134	0.930306	-5.39684
ENSRNOG00000006899	Akap14	60332	0.286962	7.72952	0.997834	0.332714	0.86998	-5.11718
ENSRNOG00000006901	Cd320	362851	0.0676415	12.1232	0.708541	0.488461	0.916089	-5.32927
ENSRNOG00000006911	Sptb	314251	0.230649	12.3639	2.00078	0.0620808	0.669061	-3.95881
ENSRNOG00000006913	Rpain	287463	-0.0476009	10.7721	-0.365492	0.719369	0.958105	-5.49223
ENSRNOG00000006916	Sardh	114123	0.136965	10.753	1.47407	0.159215	0.786967	-4.63807
ENSRNOG00000006920	Htr3b	58963	0.0247655	6.90528	0.0894931	0.929763	0.988699	-5.54871
ENSRNOG00000006926	Atp6v0d2	297932	-0.0527707	5.63838	-0.562531	0.581288	0.933513	-5.41084
ENSRNOG00000006931	Eepd1	315500	-0.0998023	12.1254	-1.06913	0.300344	0.856126	-5.0552
ENSRNOG00000006934	Acvr1b	29381	-0.133618	11.2865	-0.873853	0.394691	0.887716	-5.21601
ENSRNOG00000006946	Arhgap9	362893	-0.0985861	10.2977	-0.381842	0.707433	0.956152	-5.48676
ENSRNOG00000006947	Pdhx	311254	0.0138731	11.6506	0.195663	0.847254	0.978066	-5.53505
ENSRNOG00000006949	C1qbp	29681	-0.145777	14.148	-1.80962	0.0885369	0.7213	-4.22033
ENSRNOG00000006950	Padi3	29520	0.0325999	8.32845	0.24535	0.8092	0.96943	-5.52518
ENSRNOG00000006957	Gria4	29629	-0.123153	12.7176	-1.43725	0.169269	0.788033	-4.68023
ENSRNOG00000006963	Ctse	25424	-0.0271171	8.30054	-0.0684547	0.946243	0.991415	-5.55022
ENSRNOG00000006966	Nfia	25492	0.0242191	13.7085	0.271314	0.789502	0.966877	-5.51914
ENSRNOG00000006967	Xiap	63879	-0.190161	11.82	-2.94375	0.00926912	0.503414	-2.50943
ENSRNOG00000006968	Mrpl19	297372	-0.152005	10.9947	-1.6205	0.124004	0.745214	-4.46288
ENSRNOG00000006973	RGD1307947	314788	-0.0457549	10.5848	-0.389679	0.701738	0.956152	-5.48405
ENSRNOG00000006978	Mterf2	366856	-0.155967	10.1611	-1.2808	0.217906	0.81208	-4.8503
ENSRNOG00000006979	Hpca	29177	0.0358338	15.5512	0.408669	0.688017	0.953917	-5.47727
ENSRNOG00000006980	Vcpip1	286761	-0.0229845	13.0617	-0.337262	0.740155	0.962982	-5.50112
ENSRNOG00000006983	Nr2c1	252924	-0.00545562	11.491	-0.0679172	0.946665	0.991415	-5.55025
ENSRNOG00000006989	Vamp2	24803	0.0191314	15.1719	0.252776	0.803551	0.969305	-5.52351
ENSRNOG00000006990	Grb7	84427	-0.205973	8.05606	-1.27083	0.221347	0.817197	-4.86063
ENSRNOG00000006997	App	54226	-0.00530134	15.5179	-0.0726419	0.942961	0.990829	-5.54995
ENSRNOG00000006998	Fhl4	314678	-0.318582	8.40763	-3.17331	0.00570002	0.48895	-2.13506
ENSRNOG00000006999	Wdr78	313417	-0.167858	10.3206	-0.876837	0.393114	0.887428	-5.21377
ENSRNOG00000007002	Lif	60584	-0.228866	6.54691	-2.16061	0.0456888	0.661862	-3.72936
ENSRNOG00000007006	Slc3a1	29484	0.210122	7.38641	1.63124	0.121704	0.745214	-4.44958
ENSRNOG00000007014	Cnksr2	59322	-0.00702377	14.1338	-0.0473291	0.962817	0.992577	-5.55132
ENSRNOG00000007023	Galm	313843	0.138578	11.4802	1.16916	0.258888	0.828757	-4.96216
ENSRNOG00000007027	Hgf	24446	-0.495975	8.40082	-1.02425	0.320444	0.867747	-5.09465
ENSRNOG00000007029	Dnaja1	65028	-0.052601	15.1153	-0.899297	0.381382	0.884972	-5.19668
ENSRNOG00000007030	Epha7	171287	-0.125298	11.7303	-0.750602	0.463422	0.90945	-5.30252
ENSRNOG00000007031	Trim9	155812	0.00792864	13.3937	0.0809979	0.936414	0.989369	-5.54937
ENSRNOG00000007032	Amigo2	300186	-0.0512952	11.4663	-0.212379	0.834403	0.976972	-5.53198
ENSRNOG00000007036	Tgfbr1	29591	0.0680067	11.5123	0.388679	0.702464	0.956152	-5.4844
ENSRNOG00000007038	Cntn5	114589	-0.319419	11.0473	-1.76035	0.0967978	0.729676	-4.28516
ENSRNOG00000007040	Timm17a	54311	-0.0213469	13.9614	-0.334011	0.742562	0.963007	-5.5021
ENSRNOG00000007041	Abcg2	312382	-0.0606624	9.92021	-0.195067	0.847713	0.978066	-5.53516
ENSRNOG00000007048	Rap1b	171337	-0.0775948	14.7086	-1.25991	0.225163	0.817197	-4.87186
ENSRNOG00000007051	Rraga	117044	-0.0756741	14.1658	-1.15543	0.264309	0.832671	-4.97534
ENSRNOG00000007059	Atp1b4	84396	0.251127	6.61666	1.7133	0.105309	0.729826	-4.34603
ENSRNOG00000007060	Plin2	298199	-0.147101	12.1023	-1.23868	0.232729	0.820604	-4.89347
ENSRNOG00000007066	Htr5a	25689	-0.180553	9.34469	-1.18227	0.253793	0.828093	-4.94946
ENSRNOG00000007067	Padi1	54282	-0.147271	6.33185	-1.4891	0.155254	0.783419	-4.62063
ENSRNOG00000007069	Adhfe1	362474	-0.0410365	13.4841	-0.483591	0.635006	0.947129	-5.44747
ENSRNOG00000007078	Ccn4	65154	0.546314	7.69156	2.2425	0.0389272	0.655822	-3.60849
ENSRNOG00000007081	Xdh	497811	0.0360394	10.9758	0.269573	0.790818	0.967213	-5.51957
ENSRNOG00000007084	2019-03-10	303596	0.0535402	7.1536	0.286673	0.777917	0.965305	-5.51529
ENSRNOG00000007089	Lgmn	63865	0.055834	13.7002	0.447097	0.660596	0.951172	-5.4626
ENSRNOG00000007090	Cacna1c	24239	-0.0469327	10.9682	-0.252099	0.804066	0.96943	-5.52367
ENSRNOG00000007091	Ly6e	362934	0.0402103	14.668	0.366883	0.718351	0.958105	-5.49177
ENSRNOG00000007092	Fgb	24366	-0.0812948	6.10346	-0.775129	0.449188	0.909036	-5.28626
ENSRNOG00000007104	Itpr1	25262	-0.146897	14.9345	-1.29598	0.212751	0.806236	-4.83448
ENSRNOG00000007111	Nrdc	25499	-0.011201	13.7062	-0.17663	0.861941	0.979045	-5.53825
ENSRNOG00000007114	Psma6	29673	-0.0305791	14.0954	-0.514405	0.613764	0.942323	-5.43381
ENSRNOG00000007115	Crebl2	362453	-0.149507	13.6639	-1.98254	0.0642566	0.669061	-3.9844
ENSRNOG00000007117	Cluap1	363544	0.0361107	13.1773	0.633361	0.535145	0.924666	-5.37349
ENSRNOG00000007120	Mtmr3	305482	0.0522061	12.123	0.853524	0.405543	0.893643	-5.2311
ENSRNOG00000007124	Krcc1	312437	0.00638603	12.5056	0.0814953	0.936025	0.989369	-5.54933
ENSRNOG00000007125	Vps54	286932	-0.0430609	11.0786	-0.482394	0.635839	0.947129	-5.44799
ENSRNOG00000007126	Gpr19	312787	-0.0326283	12.068	-0.408524	0.688121	0.953923	-5.47733
ENSRNOG00000007128	Nop56	362214	-0.0320013	14.0394	-0.494701	0.627308	0.946377	-5.44264
ENSRNOG00000007129	Cd8b	24931	0.023426	6.98809	0.143271	0.887804	0.983074	-5.54306
ENSRNOG00000007134	Strap	297699	-0.00758406	14.0185	-0.113374	0.911096	0.986205	-5.54653
ENSRNOG00000007136	Anxa7	155423	-0.0310483	12.9559	-0.377454	0.710629	0.956152	-5.48825
ENSRNOG00000007137	Ly6i	246138	-0.0601624	5.89665	-0.580962	0.569087	0.931096	-5.40153
ENSRNOG00000007139	Ttpa	25571	-0.0341768	11.2255	-0.325193	0.749106	0.963544	-5.50471
ENSRNOG00000007142	B3gat1	117108	0.220384	13.645	1.52782	0.145426	0.769256	-4.57512
ENSRNOG00000007152	Bhlhe40	79431	-0.244163	14.1773	-0.705899	0.49006	0.916089	-5.3309
ENSRNOG00000007158	Qtrt1	64016	0.0292798	10.7131	0.246997	0.807946	0.96943	-5.52481
ENSRNOG00000007159	Ccl2	24770	0.0943652	6.49219	0.559366	0.583396	0.933513	-5.41241
ENSRNOG00000007177	Kdelc2	315664	0.138677	10.2486	0.685585	0.502457	0.918645	-5.34326
ENSRNOG00000007178	Cd8a	24930	0.273177	6.19024	1.20728	0.244281	0.825063	-4.92489
ENSRNOG00000007197	Nr1h4	60351	0.29902	7.1788	1.00784	0.328026	0.86998	-5.1087
ENSRNOG00000007206	LOC361016	361016	-0.292115	12.4448	-1.83225	0.0849549	0.71501	-4.19018
ENSRNOG00000007213	Yars	313047	-0.0508906	14.1082	-0.648787	0.525369	0.923857	-5.36479
ENSRNOG00000007221	Dut	497778	0.0794257	10.6338	0.679926	0.505944	0.919691	-5.34665
ENSRNOG00000007229	Nr0b2	117274	0.0357796	6.75741	0.116968	0.908292	0.986205	-5.54615
ENSRNOG00000007231	Spam1	117037	0.188327	6.18791	1.45923	0.163204	0.788033	-4.65515
ENSRNOG00000007234	Cyp51	25427	0.149403	13.6524	2.18156	0.0438631	0.661	-3.69864
ENSRNOG00000007235	Atp5mc1	29754	0.0808917	14.7184	1.07747	0.296713	0.855678	-5.04771
ENSRNOG00000007237	Id2	25587	0.0970878	13.7293	1.04729	0.31001	0.862978	-5.07458
ENSRNOG00000007238	LOC297756	297756	-0.184607	6.68745	-1.03214	0.31684	0.865116	-5.08781
ENSRNOG00000007240	Rrs1	297784	0.0603608	10.7787	0.516236	0.612512	0.942296	-5.43297
ENSRNOG00000007243	Havcr1	286934	-0.13016	6.36911	-0.877777	0.392619	0.887428	-5.21306
ENSRNOG00000007249	Cdkn1b	83571	-0.062479	11.4296	-0.325791	0.748662	0.963544	-5.50453
ENSRNOG00000007255	Zpbp2	363676	0.0831999	6.67851	0.387561	0.703276	0.956152	-5.48479
ENSRNOG00000007256	Necab1	64169	-0.162289	13.1792	-1.30857	0.208544	0.805482	-4.82122
ENSRNOG00000007262	Ccdc134	500909	0.226473	10.8734	1.4774	0.158328	0.786967	-4.63421
ENSRNOG00000007266	RGD1311251	315665	-0.0961301	7.16815	-0.512052	0.615374	0.942748	-5.43488
ENSRNOG00000007267	Mnat1	266713	-0.0482832	11.9701	-0.430075	0.672684	0.951969	-5.46926
ENSRNOG00000007272	Rnf103	84508	-0.0876958	12.0533	-1.03966	0.313437	0.863242	-5.08127
ENSRNOG00000007280	Naa60	363545	-0.0285179	13.2617	-0.441746	0.664386	0.951969	-5.46472
ENSRNOG00000007284	Slc2a1	24778	0.00646298	15.1994	0.111537	0.912531	0.986205	-5.54671
ENSRNOG00000007286	Mdm1	314859	-0.152066	10.4496	-1.38653	0.183966	0.793598	-4.73701
ENSRNOG00000007290	Atp1a2	24212	0.0801091	15.4836	1.36056	0.191878	0.795427	-4.76547
ENSRNOG00000007291	Terf1	297758	-0.0865116	9.94206	-0.754469	0.46116	0.909369	-5.29999
ENSRNOG00000007292	Spdl1	303037	-0.0743743	8.55587	-0.669834	0.512194	0.921429	-5.35262
ENSRNOG00000007299	Caap1	500501	-0.109796	12.1391	-1.79021	0.0917135	0.72456	-4.246
ENSRNOG00000007300	C1qtnf6	315114	-0.0467488	8.37296	-0.306039	0.763388	0.963675	-5.51013
ENSRNOG00000007301	Gdf9	59304	0.0530746	8.11999	0.328449	0.746688	0.963544	-5.50375
ENSRNOG00000007302	Fbn1	83727	0.271042	9.36782	1.25133	0.228198	0.81866	-4.88063
ENSRNOG00000007310	Klrb1b	25192	0.0783943	7.21116	0.487252	0.632465	0.947129	-5.44589
ENSRNOG00000007316	Idh3B	94173	-0.032985	14.3567	-0.544151	0.593587	0.937989	-5.41985
ENSRNOG00000007319	Trib3	246273	0.190711	6.90886	1.30762	0.208859	0.805482	-4.82222
ENSRNOG00000007323	Ric8b	314681	-0.462603	12.1565	-3.66217	0.00200206	0.397575	-1.33354
ENSRNOG00000007326	Prepl	298771	-0.364922	14.403	-2.3634	0.0306254	0.642877	-3.42645
ENSRNOG00000007327	Pars2	313429	-0.0900999	10.2915	-0.795789	0.437411	0.904493	-5.2722
ENSRNOG00000007330	Capzb	298584	-0.0618088	15.194	-1.32198	0.204142	0.802879	-4.80701
ENSRNOG00000007332	Sstr3	171044	0.178713	11.3123	1.07731	0.296783	0.855678	-5.04786
ENSRNOG00000007335	Ccl11	29397	-0.229903	8.38943	-1.04052	0.313047	0.863242	-5.08051
ENSRNOG00000007346	Grasp	192254	0.0306669	11.7964	0.137967	0.89193	0.9839	-5.54373
ENSRNOG00000007348	Olr1087	299586	-0.0646175	6.37193	-0.448313	0.659736	0.951172	-5.46211
ENSRNOG00000007350	Rac2	366957	-0.0335389	10.3441	-0.189913	0.851685	0.978066	-5.53605
ENSRNOG00000007351	Ggh	25455	-0.103155	12.088	-1.03082	0.317444	0.865524	-5.08896
ENSRNOG00000007354	Trpa1	312896	0.257034	5.97993	1.63496	0.120916	0.745214	-4.44496
ENSRNOG00000007356	Chmp3	282834	0.0304868	13.5577	0.458793	0.652346	0.949604	-5.45787
ENSRNOG00000007364	Rab15	299156	-0.159721	14.9108	-2.19024	0.0431261	0.661	-3.68587
ENSRNOG00000007367	2019-09-04	287606	0.0444864	15.1889	0.562123	0.58156	0.933513	-5.41105
ENSRNOG00000007369	Shisa4	360848	0.141602	14.9409	1.54743	0.140652	0.766122	-4.55176
ENSRNOG00000007370	Rnf144a	500636	-0.120243	12.0783	-1.11942	0.278933	0.836622	-5.0093
ENSRNOG00000007372	Casp1	25166	-0.144011	8.27668	-0.655851	0.520926	0.923857	-5.36075
ENSRNOG00000007374	Tac1	24806	-0.870787	13.5398	-1.86323	0.0802582	0.702194	-4.14853
ENSRNOG00000007375	Ccdc105	500800	0.111366	7.79615	0.70547	0.49032	0.916089	-5.33117
ENSRNOG00000007377	Slit3	83467	-0.000427346	11.2349	-0.00276618	0.997826	0.999481	-5.55233
ENSRNOG00000007378	Acox2	252898	0.0995106	8.09206	0.603711	0.554214	0.927471	-5.38964
ENSRNOG00000007387	Per1	287422	0.0136952	13.9332	0.0958393	0.924798	0.987805	-5.54818
ENSRNOG00000007392	Atp6v1f	116664	0.00528614	14.7517	0.0799215	0.937257	0.989504	-5.54945
ENSRNOG00000007393	Ndrg1	299923	0.102487	13.7552	0.851638	0.406559	0.894121	-5.23249
ENSRNOG00000007395	Baat	29725	-0.0578061	6.40331	-0.338358	0.739344	0.962895	-5.50079
ENSRNOG00000007400	Srebf2	300095	0.278933	13.8681	1.52434	0.146287	0.771195	-4.57924
ENSRNOG00000007404	Svbp	362578	-0.0283752	9.72062	-0.293621	0.772694	0.965049	-5.51348
ENSRNOG00000007410	Dab1	266729	-0.0674916	12.8539	-0.917317	0.37214	0.882915	-5.18269
ENSRNOG00000007412	Dok1	312477	-0.0460758	8.70653	-0.344478	0.734822	0.961281	-5.49891
ENSRNOG00000007415	Ptgs1	24693	0.298515	10.7238	1.34601	0.196432	0.798628	-4.78124
ENSRNOG00000007416	Clp1	311166	-0.0135694	11.368	-0.185785	0.85487	0.97849	-5.53675
ENSRNOG00000007420	Hrh1	24448	0.108365	10.2268	0.855093	0.404698	0.893643	-5.22995
ENSRNOG00000007427	Entpd6	85260	-0.0802925	12.7357	-0.636676	0.533037	0.924666	-5.37163
ENSRNOG00000007439	Unc13d	192177	0.0888889	9.26906	1.18395	0.253145	0.828093	-4.94782
ENSRNOG00000007442	Ubl7	300744	0.11625	13.4758	1.14688	0.267727	0.833828	-4.98348
ENSRNOG00000007443	Jag1	29146	-1.24544	9.14791	-2.30551	0.0343695	0.651599	-3.51412
ENSRNOG00000007456	Calb1	83839	-0.19802	13.9815	-2.13422	0.0480879	0.663657	-3.76785
ENSRNOG00000007457	Serping1	295703	0.0581154	11.509	0.191628	0.850363	0.978066	-5.53576
ENSRNOG00000007461	Klhl41	117537	-0.108481	7.19135	-0.720122	0.481489	0.913613	-5.32205
ENSRNOG00000007468	Ifng	25712	0.0816129	5.67085	0.710897	0.487038	0.915878	-5.32781
ENSRNOG00000007477	Edn3	366270	-0.106599	8.19603	-0.326343	0.748251	0.963544	-5.50437
ENSRNOG00000007478	Cry2	170917	-0.18163	13.9912	-2.28475	0.0358131	0.651599	-3.54534
ENSRNOG00000007485	Arfgef2	296380	0.0951503	12.1577	1.21211	0.242477	0.825063	-4.92011
ENSRNOG00000007486	Atg7	312647	0.15903	12.6108	1.75314	0.0980614	0.729676	-4.29456
ENSRNOG00000007490	Gabrr2	29695	-0.0145459	8.41869	-0.0494007	0.961191	0.992577	-5.55123
ENSRNOG00000007492	Rpn2	64701	-0.0262602	14.3843	-0.357059	0.725555	0.960555	-5.49496
ENSRNOG00000007495	Smpx	84416	0.443794	6.22279	1.52204	0.146858	0.771734	-4.58197
ENSRNOG00000007500	Top1mt	300029	0.0610928	11.6624	0.722444	0.480097	0.913613	-5.32059
ENSRNOG00000007504	Actr10	299121	0.00146292	13.7753	0.0225835	0.982252	0.996119	-5.5521
ENSRNOG00000007506	Ndufaf4	362495	-0.00237073	12.3244	-0.0470848	0.963009	0.992577	-5.55133
ENSRNOG00000007509	Slc1a6	84012	0.0794551	8.96413	0.668547	0.512994	0.921432	-5.35337
ENSRNOG00000007519	Tmem43	362401	-0.0702481	11.5084	-0.998324	0.332483	0.86998	-5.11677
ENSRNOG00000007523	Cct6b	363658	-0.160163	6.88527	-0.989801	0.33651	0.86998	-5.12393
ENSRNOG00000007525	Defb22	171412	0.0712846	7.05193	0.6563	0.520645	0.923857	-5.36049
ENSRNOG00000007528	Kcnh7	170739	0.191605	11.1625	0.519738	0.610122	0.941584	-5.43136
ENSRNOG00000007529	Bmf	246142	0.0604161	8.71561	0.435293	0.668969	0.951969	-5.46724
ENSRNOG00000007532	RGD1305178	311855	-0.216217	13.9151	-3.27643	0.00457508	0.458295	-1.96603
ENSRNOG00000007539	Rsad2	65190	0.0241802	8.01708	0.125424	0.901698	0.986205	-5.54523
ENSRNOG00000007542	Scg5	25719	-0.0039016	15.3876	-0.0599925	0.952879	0.992227	-5.55071
ENSRNOG00000007545	Angptl4	362850	-0.0525249	11.2199	-0.266324	0.793276	0.968035	-5.52035
ENSRNOG00000007546	Asns	25612	0.017658	12.9198	0.184413	0.855928	0.97849	-5.53698
ENSRNOG00000007558	Defb36	641640	0.1904	7.38119	1.04214	0.312319	0.862988	-5.0791
ENSRNOG00000007567	Rem1	366232	-0.0351748	9.61787	-0.438499	0.66669	0.951969	-5.46599
ENSRNOG00000007568	Spata6	171413	0.116298	10.8743	0.543871	0.593776	0.937989	-5.41998
ENSRNOG00000007574	Padi2	29511	0.173662	13.1034	1.30619	0.209335	0.80571	-4.82374
ENSRNOG00000007575	Plppr1	298062	-0.702561	12.5646	-2.24776	0.0385261	0.655822	-3.60065
ENSRNOG00000007576	Zfp597	266774	-0.237918	11.7956	-0.872714	0.395294	0.888036	-5.21687
ENSRNOG00000007578	Zfp830	497967	-0.171577	12.3019	-1.83003	0.0852993	0.715625	-4.19314
ENSRNOG00000007581	Slc17a8	266767	-0.161407	8.52991	-0.491343	0.62963	0.947129	-5.44411
ENSRNOG00000007584	Ehd4	192204	-0.0105921	11.734	-0.0927407	0.927222	0.988459	-5.54845
ENSRNOG00000007587	Tcp11l2	314683	-0.0466819	12.655	-0.37997	0.708795	0.956152	-5.4874
ENSRNOG00000007596	Rffl	282844	0.0770094	12.28	0.355411	0.726767	0.96089	-5.49548
ENSRNOG00000007600	Igsf1	302822	-0.179679	12.3003	-0.652039	0.523321	0.923857	-5.36294
ENSRNOG00000007601	Inhbe	83711	-0.178887	6.29938	-1.39904	0.180247	0.790701	-4.72314
ENSRNOG00000007603	Gabrr1	29694	-0.0905856	7.48937	-0.882201	0.390291	0.887428	-5.20973
ENSRNOG00000007604	Igsf8	304979	0.115406	13.7674	1.29845	0.211921	0.806236	-4.83188
ENSRNOG00000007607	Nr4a1	79240	0.072523	14.9957	0.402005	0.69282	0.955837	-5.47969
ENSRNOG00000007611	Hoxb7	497985	-0.33145	5.74415	-1.60507	0.127373	0.750828	-4.48189
ENSRNOG00000007613	C1qtnf5	315598	0.15979	13.1037	1.48686	0.155838	0.783721	-4.62323
ENSRNOG00000007624	Il4	287287	-0.210976	6.85086	-1.87904	0.0779512	0.698295	-4.12712
ENSRNOG00000007629	Sf3a3	313583	-0.0318765	13.0595	-0.383753	0.706043	0.956152	-5.4861
ENSRNOG00000007640	Npbwr1	297795	-0.16273	6.0993	-1.38903	0.183216	0.793102	-4.73424
ENSRNOG00000007644	Mbtps2	302705	-0.405311	11.3848	-4.21396	0.000614659	0.386669	-0.442855
ENSRNOG00000007645	Kcnj9	116560	0.516381	11.8896	2.33194	0.0326101	0.651599	-3.47421
ENSRNOG00000007646	Sipa1l1	246212	-0.0787944	15.1466	-1.19995	0.247041	0.826535	-4.93214
ENSRNOG00000007647	Oprk1	29335	-0.976079	9.95358	-1.94454	0.069011	0.675655	-4.0373
ENSRNOG00000007648	Rab11b	79434	-0.0293959	14.837	-0.524658	0.606772	0.941173	-5.42908
ENSRNOG00000007649	Dnm2	25751	-0.0294648	13.4146	-0.314004	0.757438	0.963675	-5.50792
ENSRNOG00000007650	Cd63	29186	0.0451629	14.6562	0.478784	0.638351	0.947235	-5.44953
ENSRNOG00000007652	Il13	116553	-0.0724139	6.69729	-0.456812	0.65374	0.949604	-5.45868
ENSRNOG00000007657	Col27a1	298101	0.263628	11.6158	2.93268	0.00948768	0.503414	-2.52738
ENSRNOG00000007660	Fntb	64511	-0.0718535	12.8187	-0.754899	0.460909	0.909369	-5.29971
ENSRNOG00000007671	Smu1	117541	-0.0619506	12.9563	-1.02334	0.320861	0.868136	-5.09543
ENSRNOG00000007673	Ppig	83624	0.0908548	13.6101	1.16025	0.262397	0.830951	-4.97073
ENSRNOG00000007680	Fhl5	297954	0.260334	6.20836	2.34417	0.0318245	0.651599	-3.45567
ENSRNOG00000007682	Gria3	29628	-0.0429925	14.483	-0.411965	0.685647	0.953917	-5.47607
ENSRNOG00000007686	2019-09-03	56003	0.0449246	14.3413	0.486795	0.632782	0.947129	-5.44609
ENSRNOG00000007688	Sms	363469	-0.17678	13.0198	-1.92538	0.071526	0.687034	-4.06376
ENSRNOG00000007699	Golga5	299258	-0.050508	11.5656	-0.624521	0.540793	0.924835	-5.37838
ENSRNOG00000007700	Inhbc	64549	-0.0877555	6.67773	-0.464678	0.648211	0.949057	-5.45545
ENSRNOG00000007705	Kcnj10	29718	0.112091	14.0235	1.04761	0.309862	0.862871	-5.07429
ENSRNOG00000007706	Prkaa2	78975	-0.0595937	12.4448	-0.580709	0.569254	0.931096	-5.40166
ENSRNOG00000007707	Zfp467	500110	-0.124541	10.9967	-0.633491	0.535063	0.924666	-5.37341
ENSRNOG00000007725	Mis12	501706	-0.147559	11.7445	-1.57686	0.133732	0.760583	-4.51631
ENSRNOG00000007726	Mcam	78967	-0.0395083	14.2855	-0.242158	0.81163	0.970568	-5.52588
ENSRNOG00000007727	Lhfpl4	353230	-0.224474	11.0159	-0.912917	0.374382	0.883065	-5.18613
ENSRNOG00000007730	Vom2r53	286915	-0.0799365	7.32223	-0.372488	0.714252	0.956977	-5.48992
ENSRNOG00000007733	Arhgef9	66013	-0.046983	14.4965	-0.693185	0.497798	0.917506	-5.33868
ENSRNOG00000007735	Pigm	79112	-0.0279404	10.5299	-0.259934	0.798118	0.968865	-5.52186
ENSRNOG00000007740	Tacstd2	494343	0.14601	6.96011	0.891749	0.385298	0.887428	-5.20247
ENSRNOG00000007743	Mgst1	171341	-0.174001	10.687	-1.00026	0.331574	0.86998	-5.11513
ENSRNOG00000007744	Ehd3	192249	-0.00612815	13.0812	-0.0391755	0.969219	0.993704	-5.55164
ENSRNOG00000007752	Zmynd19	311791	0.137754	12.453	1.74886	0.0988183	0.729676	-4.30012
ENSRNOG00000007753	Plaa	116645	-0.0374827	13.0186	-0.59044	0.562865	0.930306	-5.39663
ENSRNOG00000007756	Atg101	300240	0.073516	13.7412	0.866939	0.39836	0.891144	-5.22118
ENSRNOG00000007763	Plod1	116552	-0.042255	13.4831	-0.261283	0.797095	0.968504	-5.52155
ENSRNOG00000007766	Pqbp1	302557	-0.0796059	14.2997	-1.3643	0.190722	0.795427	-4.7614
ENSRNOG00000007769	2019-03-02	362849	0.214376	12.786	2.15474	0.0462127	0.663402	-3.73794
ENSRNOG00000007771	Dbil5	59116	0.158362	7.0731	0.753196	0.461904	0.909369	-5.30082
ENSRNOG00000007775	Cmpk1	298410	-0.125898	12.3643	-1.68861	0.110029	0.73597	-4.37754
ENSRNOG00000007778	Alox15b	266604	0.0900769	6.27922	0.570598	0.575931	0.933159	-5.4068
ENSRNOG00000007781	Stau1	84496	0.0343532	13.7333	0.522736	0.60808	0.941173	-5.42997
ENSRNOG00000007782	Ghrh	29446	-0.0257942	6.49216	-0.146636	0.885189	0.982724	-5.54262
ENSRNOG00000007788	Glod4	363644	-0.117741	12.5945	-1.74783	0.0990025	0.729676	-4.30147
ENSRNOG00000007793	Pnrc1	286988	0.029268	12.7128	0.32823	0.74685	0.963544	-5.50382
ENSRNOG00000007795	AABR07058410.1	60667	-0.197419	9.13003	-1.94692	0.0687047	0.675655	-4.03401
[truncated: 7,533 more rows]
