# Supplementary material for: Genetic regulatory subnetworks and key regulating genes in rat hippocampus perturbed by prenatal malnutrition: implications for major brain disorders
Source: Aging (Albany NY). 2020 May 11;12(9):8434–58. doi: 10.18632/aging.103150 (PMC7244046; doi:10.18632/aging.103150)
Supplement: Supplementary Table 8 [file aging-12-103150-s003.xlsx]

## Sheet: Blue
	ID	Type	Description	GeneRatio	BgRatio	pvalue	p.adjust	qvalue	geneID	Count
rno03010	rno03010	KEGG	Ribosome	41/444	179/8895	6.08185e-17	1.73941e-14	1.6389e-14	124323/122799/81769/108348287/161477/684988/29282/81776/293666/65043/29284/100911847/94266/64156/57809/100359498/103690996/108349682/29257/100360449/100364457/29287/108348115/81773/64307/25348/108352650/140662/100911575/140654/65139/29285/100362640/81729/300079/140661/100360522/301240/58927/81767/83789	41
rno05016	rno05016	KEGG	Huntington disease	22/444	202/8895	0.000455466	0.0522956	0.0492737	54322/24418/29478/641434/29445/81646/366448/140670/24408/654441/362339/29495/288088/362588/100363268/117017/29430/83474/29507/688386/117526/497902	22
rno05418	rno05418	KEGG	Fluid shear stress and atherosclerosis	18/444	152/8895	0.000548555	0.0522956	0.0492737	64352/108348148/24314/310635/306330/116484/114553/309295/363855/24421/108348061/301442/24600/83619/79462/25266/29568/114243	18
rno04962	rno04962	KEGG	Vasopressin-regulated water reabsorption	8/444	43/8895	0.0011207	0.0801302	0.0754999	25289/81646/288779/24896/362339/81830/81655/360678	8
rno04727	rno04727	KEGG	GABAergic synapse	12/444	92/8895	0.00197519	0.08989	0.0846958	24922/25289/64532/171373/29705/24398/29430/64670/100359937/79212/83633/81632	12
rno01522	rno01522	KEGG	Endocrine resistance	12/444	93/8895	0.00216813	0.08989	0.0846958	25289/363026/54238/83571/64532/24896/56761/83569/85385/25718/29146/94201	12
rno00130	rno00130	KEGG	Ubiquinone and other terpenoid-quinone biosynthesis	4/444	12/8895	0.00220011	0.08989	0.0846958	24314/25249/498332/29309	4
rno04714	rno04714	KEGG	Thermogenesis	23/444	245/8895	0.00258406	0.09238	0.0870419	54322/29478/641434/29445/25289/81647/89786/81646/366448/361745/24855/64532/654441/24896/362339/288088/362588/100363268/60445/29507/688386/497902/56769	23
rno04211	rno04211	KEGG	Longevity regulating pathway	11/444	89/8895	0.00457919	0.145516	0.137108	25289/81647/81646/24954/24855/64532/362339/60445/25718/117045/289036	11
rno04928	rno04928	KEGG	Parathyroid hormone synthesis, secretion and action	12/444	106/8895	0.00639566	0.182722	0.172163	25289/81647/81646/64532/24896/362339/25387/81518/303634/25271/361801/85471	12
rno00250	rno00250	KEGG	Alanine, aspartate and glutamate metabolism	6/444	36/8895	0.00813234	0.182722	0.172163	25721/297417/59085/24398/246307/81632	6
rno05030	rno05030	KEGG	Cocaine addiction	7/444	47/8895	0.00819005	0.182722	0.172163	81647/81646/24408/64532/24896/362339/29495	7
rno04072	rno04072	KEGG	Phospholipase D signaling pathway	15/444	151/8895	0.00830552	0.182722	0.172163	24418/25289/29337/24954/24855/64532/24896/314641/25439/60445/303634/116691/85385/84477/25266	15
rno00520	rno00520	KEGG	Amino sugar and nucleotide sugar metabolism	7/444	48/8895	0.00918806	0.187699	0.176853	297417/291095/246232/25059/300089/171015/501167	7

## Sheet: Pink
	ID	Type	Description	GeneRatio	BgRatio	pvalue	p.adjust	qvalue	geneID	Count
rno04713	rno04713	KEGG	Circadian entrainment	8/139	100/8895	0.000161378	0.0345348	0.0304069	24409/58979/114862/64508/29241/497757/60449/25202	8
rno00515	rno00515	KEGG	Mannose type O-glycan biosynthesis	4/139	24/8895	0.000475896	0.0509209	0.0448345	117108/494342/688673/140568	4
rno04020	rno04020	KEGG	Calcium signaling pathway	10/139	199/8895	0.00109151	0.0778612	0.0685546	140447/24409/114862/296369/64508/29241/114115/29715/25007/171503	10
rno04540	rno04540	KEGG	Gap junction	6/139	88/8895	0.00247946	0.132651	0.116796	64508/29241/497757/24318/64158/25202	6
rno00532	rno00532	KEGG	Glycosaminoglycan biosynthesis - chondroitin sulfate / dermatan sulfate	3/139	21/8895	0.0040413	0.152876	0.134603	286974/304322/302302	3
rno04022	rno04022	KEGG	cGMP-PKG signaling pathway	8/139	173/8895	0.00565818	0.152876	0.134603	79255/140447/81762/64508/29241/497757/29715/25202	8
rno03040	rno03040	KEGG	Spliceosome	7/139	138/8895	0.00580046	0.152876	0.134603	362264/192246/287727/291797/302557/307410/313583	7
rno05030	rno05030	KEGG	Cocaine addiction	4/139	47/8895	0.00605432	0.152876	0.134603	79255/24409/24318/29481	4
rno04015	rno04015	KEGG	Rap1 signaling pathway	9/139	218/8895	0.00707482	0.152876	0.134603	362799/24409/64508/29241/246212/114705/245903/24318/361714	9
rno04062	rno04062	KEGG	Chemokine signaling pathway	8/139	180/8895	0.00714374	0.152876	0.134603	81760/81762/58979/64508/59076/29241/361714/60449	8
rno04725	rno04725	KEGG	Cholinergic synapse	6/139	114/8895	0.00878242	0.170858	0.150436	79255/29682/58979/64508/29241/60449	6
rno04014	rno04014	KEGG	Ras signaling pathway	9/139	239/8895	0.0124967	0.199304	0.175481	298579/207119/108348044/362799/24409/58979/50658/361714/60449	9
rno04727	rno04727	KEGG	GABAergic synapse	5/139	92/8895	0.0144079	0.199304	0.175481	64845/58979/64508/29241/60449	5
rno04141	rno04141	KEGG	Protein processing in endoplasmic reticulum	7/139	165/8895	0.0147202	0.199304	0.175481	301252/114590/79255/85273/84478/300084/50658	7
rno05032	rno05032	KEGG	Morphine addiction	5/139	93/8895	0.0150406	0.199304	0.175481	58979/64508/59076/29241/60449	5
rno04611	rno04611	KEGG	Platelet activation	6/139	130/8895	0.0160589	0.199304	0.175481	81762/64508/29241/497757/361714/25202	6
rno04926	rno04926	KEGG	Relaxin signaling pathway	6/139	131/8895	0.0166199	0.199304	0.175481	79255/58979/64508/29241/50658/60449	6
rno04728	rno04728	KEGG	Dopaminergic synapse	6/139	133/8895	0.0177824	0.199304	0.175481	79255/24409/58979/50658/24318/60449	6
rno04270	rno04270	KEGG	Vascular smooth muscle contraction	6/139	135/8895	0.0189996	0.199304	0.175481	298579/81762/64508/29241/497757/25202	6
rno04925	rno04925	KEGG	Aldosterone synthesis and secretion	5/139	99/8895	0.0192295	0.199304	0.175481	79255/114862/64508/29241/171503	5
rno00230	rno00230	KEGG	Purine metabolism	6/139	136/8895	0.0196291	0.199304	0.175481	246272/64508/29241/497757/360629/25202	6
rno04927	rno04927	KEGG	Cortisol synthesis and secretion	4/139	68/8895	0.0215213	0.199304	0.175481	79255/114862/64508/29241	4
rno00760	rno00760	KEGG	Nicotinate and nicotinamide metabolism	3/139	39/8895	0.0226515	0.199304	0.175481	499330/360629/292875	3
rno04371	rno04371	KEGG	Apelin signaling pathway	6/139	141/8895	0.0229907	0.199304	0.175481	140447/58979/64508/29241/29715/60449	6
rno04614	rno04614	KEGG	Renin-angiotensin system	3/139	40/8895	0.0242145	0.199304	0.175481	64517/171105/108348118	3
rno04975	rno04975	KEGG	Fat digestion and absorption	3/139	40/8895	0.0242145	0.199304	0.175481	298579/406165/84497	3
rno04918	rno04918	KEGG	Thyroid hormone synthesis	4/139	72/8895	0.0259295	0.205515	0.180951	79255/64508/29241/29326	4

## Sheet: Salmon
	ID	Type	Description	GeneRatio	BgRatio	pvalue	p.adjust	qvalue	geneID	Count
rno04721	rno04721	KEGG	Synaptic vesicle cycle	7/67	78/8895	1.72982e-06	0.000313098	0.000293159	64829/25716/257648/116638/24803/286931/140694	7
rno05033	rno05033	KEGG	Nicotine addiction	3/67	40/8895	0.00330719	0.20236	0.189473	24410/257648/116638	3
rno04020	rno04020	KEGG	Calcium signaling pathway	6/67	199/8895	0.00373542	0.20236	0.189473	25229/81662/308451/257648/24239/24598	6
rno04024	rno04024	KEGG	cAMP signaling pathway	6/67	214/8895	0.00532052	0.20236	0.189473	25229/25504/24410/25354/24239/25747	6
rno04930	rno04930	KEGG	Type II diabetes mellitus	3/67	50/8895	0.00621911	0.20236	0.189473	257648/24239/25058	3
rno04713	rno04713	KEGG	Circadian entrainment	4/67	100/8895	0.00670807	0.20236	0.189473	24410/24239/24598/192363	4
rno05014	rno05014	KEGG	Amyotrophic lateral sclerosis (ALS)	3/67	56/8895	0.00851847	0.202747	0.189836	24410/78963/24598	3
rno04725	rno04725	KEGG	Cholinergic synapse	4/67	114/8895	0.0105562	0.202747	0.189836	25229/81662/257648/24239	4
rno03010	rno03010	KEGG	Ribosome	5/67	179/8895	0.0110224	0.202747	0.189836	29304/100912032/117053/298517/124440	5
rno04724	rno04724	KEGG	Glutamatergic synapse	4/67	116/8895	0.0112015	0.202747	0.189836	65040/24410/116638/24239	4
rno05010	rno05010	KEGG	Alzheimer disease	5/67	185/8895	0.0125817	0.207027	0.193843	24410/78963/24239/24598/140945	5
