# Supplementary material for: Genetic regulatory subnetworks and key regulating genes in rat hippocampus perturbed by prenatal malnutrition: implications for major brain disorders
Source: Aging (Albany NY). 2020 May 11;12(9):8434–58. doi: 10.18632/aging.103150 (PMC7244046; doi:10.18632/aging.103150)
Supplement: Supplementary Table 9 [file aging-12-103150-s011.xlsx]

## Sheet: H_RAW
SEQ_ID	F6F2H	F3F2H	F2F2H	F5M2H	F6M4H	F7M4H	C2F2H	C4F3H	C3M4H	C5M3H	C4M3H	F3F3H	F2F1H	F7M3H	F7M2H	C5F1H	C5M1H
NM_001000000	15.8088	17.8855	13.2256	14.3707	17.0274	15.886	14.0069	24.095	14.2722	18.7885	14.8888	66.485	70.6043	99.0485	104.375	66.5465	88.2564
NM_001000001	63.8267	135.354	91.482	84.7288	89.2918	91.3246	77.3101	69.6977	84.4939	90.5063	90.5808	201.674	240.292	192.391	223.944	194.429	317.417
NM_001000002	244.96	383.908	313.905	323.642	410.162	288.634	400.326	382.503	318.386	419.605	212.302	951.973	1263.64	845.366	1045.92	678.298	1353.52
NM_001000003	94.0514	126.07	110.164	118.812	124.261	84.1025	134.84	116.684	98.7444	102.001	80.9269	253.815	363.649	262.264	262.272	226.539	348.666
NM_001000004	64.2463	195.189	100.504	83.4067	83.295	77.3767	82.2691	68.5222	71.9666	97.0682	93.3747	306.05	473.993	237.29	309.653	292.498	594.589
NM_001000005	19.0222	30.8316	25.0816	19.9047	20.6416	17.3182	15.1275	18.6223	15.0171	27.5909	17.2304	76.9457	72.746	84.4174	83.9665	69.3399	82.3956
NM_001000006	61.8112	160.09	80.1721	90.9803	84.6892	94.1289	88.5022	52.8919	59.5732	93.544	57.5998	150.749	239.391	181.173	123.593	115.014	316.464
NM_001000007	101.639	332.097	139.513	140.609	124.257	118.829	137.961	103.832	92.517	184.781	143.686	425.761	569.42	404.546	207.952	327.292	823.07
NM_001000008	56.2151	151.577	69.3887	75.351	51.6773	52.2036	44.5225	51.3426	85.0357	74.7145	70.4571	187.085	292.113	371.096	181.45	215.853	389.599
NM_001000009	84.2117	260.117	111.81	105.237	118.706	104.51	72.672	77.4474	73.8669	129.259	106.393	176.81	313.603	204.96	265.865	229.271	499.044
NM_001000010	86.2637	164.918	103.234	99.7098	105.373	88.2559	85.6923	70.3027	65.8955	106.9	77.0458	144.018	311.401	175.634	196.063	183.784	316.625
NM_001000011	102.317	307.954	124.147	141.623	133.017	133.384	124.924	99.0916	91.6158	149.254	143.129	282.498	374.199	230.557	216.913	274.217	520.688
NM_001000012	19.732	42.2284	27.3839	20.1427	33.6256	36.2968	24.1864	19.4292	18.5828	27.6561	19.9178	149.344	167.122	137.326	135.872	120.139	163.552
NM_001000013	101.173	251.892	169.416	137.531	176.977	119.195	156.578	123.942	89.138	147.04	81.5352	212.44	407.986	275.73	176.951	279.482	533.231
NM_001000014	144.642	823.341	506.189	239.484	426.797	378.896	419.557	295.613	282.692	416.893	262.229	789.589	1350.09	764.2	639.399	583.2	1380.78
NM_001000015	41.5159	153.488	68.9585	48.4302	64.5855	49.5287	57.9826	40.6163	37.6039	69.2466	52.5584	101.172	185.241	164.373	70.2076	95.3313	206.709
NM_001000016	79.5429	425.822	175.95	122.395	95.2185	75.3733	126.044	111.246	100.74	209.782	141.391	386.211	580.965	266.092	183.482	335.269	777.13
NM_001000017	10.375	24.9975	17.7186	20.3841	22.1117	23.0095	25.9462	20.122	16.8422	23.2307	18.7033	64.3029	124.006	58.9327	61.7415	64.799	133.079
NM_001000018	155.965	168.975	207.742	209.384	200.574	200.37	182.215	169.629	157.039	106.009	94.6066	379.132	561.75	407.418	449.574	352.237	390.131
NM_001000019	84.7387	95.5148	101.982	89.434	131.32	110.04	118.777	86.0121	80.6418	79.0589	48.4377	292.82	442.44	324.93	244.111	236.75	317.948
NM_001000020	27.2714	58.8036	51.9204	45.3364	46.3977	40.4562	42.5111	37.5542	33.664	69.6696	56.4645	94.1951	334.042	155.777	88.8073	164.366	153.153
NM_001000021	29.33	75.5094	38.9453	39.2202	28.3175	28.1216	35.7199	19.1792	34.9641	38.8669	29.6092	156.84	170.114	196.865	130.663	281.56	203.675
NM_001000022	28.3189	104.85	54.9108	40.2119	58.3894	38.4173	72.2654	58.0669	42.4541	73.3929	66.3416	146.237	138.795	97.2963	86.2618	88.3557	229.763
NM_001000023	34.4626	31.5016	48.9542	43.6645	37.9761	32.6442	33.5639	37.4685	27.1258	28.2567	24.7914	204.328	148.257	124.666	130.163	158.888	207.705
NM_001000024	58.2331	226.174	117.057	103.766	72.7669	72.2176	64.5831	86.4501	69.3539	108.758	110.443	463.864	432.914	321.182	349.929	256.602	555.84
NM_001000025	50.057	217.557	93.6611	83.9319	78.4945	53.5218	61.1747	49.9396	39.2736	91.685	73.0881	138.698	249.677	130.615	100.866	204.934	229.529
NM_001000026	49.8644	145.507	66.5763	61.8042	50.3996	29.7999	47.5253	41.3479	37.361	46.8264	31.7907	141.03	283.492	285.642	254.743	104.602	347.758
NM_001000027	81.34	201.109	173.9	148.112	152.277	103.397	139.519	138.669	113.351	161.195	118.555	328.312	478.908	244.177	365.775	230.65	492.115
NM_001000028	11.0351	14.3443	11.4852	13.0231	9.8005	9.9889	11.9592	12.1016	10.6734	12.3112	12.2028	44.509	57.5967	64.6023	64.8852	71.01	71.0141
NM_001000029	54.4626	81.7974	82.0122	62.112	84.6596	83.6691	82.8303	79.1412	57.8235	74.0592	46.2101	468.063	529.252	548.501	544.992	371.452	616.779
NM_001000030	13.9834	21.0913	18.7803	14.8389	11.828	15.2298	15.6265	16.2147	16.4508	16.944	19.8419	62.474	100.459	86.8067	97.3641	87.5918	94.0033
NM_001000031	11.7819	20.7978	14.9477	15.9824	13.023	11.6097	14.3013	14.3138	11.8986	13.8688	15.6411	166.294	155.831	149.265	160.871	140.709	165.09
NM_001000032	18.9249	33.9738	25.876	26.6217	25.9162	18.0361	20.5633	22.1254	21.271	29.8909	31.1026	127.638	205.232	121.684	87.4265	143.929	126.91
NM_001000033	24.2455	24.5183	35.1168	17.7785	12.7292	11.4838	18.3021	19.4604	15.2316	21.6148	16.6756	68.3892	116.276	86.8981	157.593	94.8912	161.093
NM_001000034	79.7981	212.133	166.216	133.597	214.939	166.372	159.346	152.39	169.988	169.836	160.365	583.792	628.131	309.562	389.354	274.651	626.004
NM_001000035	27.1599	54.0967	32.2699	33.8463	30.7448	30.6791	43.3999	32.0039	25.2691	42.8044	28.9302	92.3219	110.204	105.693	87.8875	83.331	99.0487
NM_001000036	25.5915	59.017	30.0237	31.651	39.4272	40.0278	39.8572	33.8734	31.8358	42.9194	23.966	112.822	187.606	65.4093	90.1791	106.656	112.926
NM_001000037	56.3459	181.44	88.2088	80.9235	78.9529	86.4862	84.327	56.9187	70.995	133.429	101.806	230.889	388.219	280.209	168.527	252.484	365.51
NM_001000038	155.897	466.542	306.775	266.329	295.279	271.001	229.836	201.383	223.004	329.044	215.735	719.322	1161.53	970.584	743.947	930.812	1300.15
NM_001000039	199.591	403.155	287.702	320.953	273.231	235.554	262.075	180.024	190.892	211.742	146.522	463.802	715.538	531.51	467.284	1230.69	670.04
NM_001000040	82.3325	179.627	91.092	123.716	91.1815	82.6252	81.104	83.5599	76.2391	77.9049	43.5606	177.432	293.187	182.309	185.166	166.598	300.27
NM_001000041	18.0084	27.0011	15.9832	20.4839	24.8145	17.8957	17.6068	19.0695	17.8498	18.8511	22.984	79.9145	56.9311	72.0696	46.5141	42.4457	75.52
NM_001000042	71.619	265.4	146.657	142.742	119.205	107.284	132.479	75.7037	73.9816	124.409	118.424	129.043	246.089	206.619	106.626	130.898	243.52
NM_001000043	30.2212	100.145	59.6609	57.2773	53.3143	31.6487	39.5849	60.5641	34.5301	49.041	58.1079	136.828	173.778	101.18	113.526	157.521	207.128
NM_001000044	34.1817	150.337	72.4725	74.0894	53.7403	31.3039	47.8571	48.9759	41.6982	68.3617	70.7597	224.741	314.224	258.796	173.982	159.579	271.611
NM_001000045	25.1486	21.1694	16.8819	20.1977	50.6836	40.1206	57.2287	44.4348	40.6615	44.3063	40.9344	95.0827	85.5522	98.3158	99.1977	75.7561	107.66
NM_001000046	14.05	16.6105	15.5665	16.5682	17.3796	20.9645	17.2146	16.4337	11.9545	19.073	19.1998	53.104	81.5003	50.8072	48.4362	102.463	60.0686
NM_001000047	18.7846	28.159	17.9528	20.2536	14.2011	16.451	19.1884	15.7282	13.5414	22.8141	17.8417	165.686	53.7162	57.8492	71.5269	66.4653	58.8901
NM_001000048	19.6876	28.8323	20.1268	21.5779	22.6074	21.1947	15.3682	21.5201	16.5817	22.0777	20.3361	66.9666	75.7334	54.4286	93.7617	62.8472	54.4418
NM_001000049	27.5824	34.7741	32.2063	38.0998	34.2057	37.6248	35.5066	32.6021	36.188	38.9175	36.4658	154.596	158.084	216.38	395.302	150.128	351.678
NM_001000050	96.618	100.003	111.252	99.2193	101.888	88.1882	89.9594	112.6	102.921	99.7704	80.0262	482.313	482.994	224.339	442.211	378.467	382.731
NM_001000051	52.0129	29.7932	60.9752	79.1656	53.988	57.4383	54.5611	74.8002	77.839	54.9685	31.5843	216.127	160.705	195.87	254.137	167.707	219.527
NM_001000052	13.224	21.3673	15.2007	14.3048	14.5015	12.4595	18.7369	21.4112	10.8873	16.8427	21.1671	53.5284	85.9436	48.8005	45.7822	57.5855	72.221
NM_001000054	44.9313	178.968	90.3695	100.036	59.163	74.8679	58.3571	59.0609	65.1809	99.226	112.639	251.907	530.895	342.959	175.768	308.274	424.522
NM_001000055	20.557	29.5645	21.4536	28.3835	25.6414	24.7497	29.7022	23.7222	19.4856	29.1392	25.8691	143.311	117.188	86.6081	92.3764	115.547	133.405
NM_001000056	13.5417	19.8599	17.3154	13.9503	15.8924	13.4588	13.9638	14.5999	13.6396	14.0279	16.9558	64.7884	80.8584	65.1895	69.0633	67.2356	90.6772
NM_001000057	25.894	27.1275	33.2457	32.5182	22.5146	21.0414	19.9917	20.9721	21.0111	26.9505	22.692	106.59	58.6094	95.0182	109.064	70.5555	76.225
NM_001000058	29.0059	63.6915	44.0348	51.0568	52.2283	45.9812	56.4357	58.3568	69.8573	84.9098	69.1912	201.699	216.436	340.754	168.595	241.176	337.871
NM_001000059	18.0831	44.7802	21.4706	24.7545	19.1678	19.2692	20.7155	18.4178	18.3797	30.0046	19.6312	79.9575	139.134	107.758	61.9241	83.2533	102.656
NM_001000060	28.1531	57.7364	40.8839	50.2405	31.7923	31.3376	38.8965	30.3675	24.0808	49.5518	47.3572	97.9693	156.108	165.484	81.5287	132.251	158.094
NM_001000061	9.5054	13.547	13.0641	14.404	13.312	14.9889	13.9085	12.2916	13.2156	13.3581	16.7982	45.6023	62.2914	44.0787	50.3638	41.0915	78.8879
NM_001000062	10.3746	18.2347	11.7763	12.1654	17.2333	18.9785	15.0666	21.6468	18.3284	22.1517	16.182	103.475	99.7366	93.5245	123.805	89.6278	106
NM_001000063	17.6755	28.4634	24.2384	22.5216	18.8831	19.0633	18.0879	20.6546	14.5024	28.2828	23.0983	75.3926	79.1239	93.6006	66.6403	56.5	85.9477
NM_001000064	10.8717	15.7464	12.3177	12.4188	11.9237	12.496	12.5506	10.2337	9.1472	13.4623	13.1099	55.7441	51.4648	48.4925	53.1346	49.9028	57.3623
NM_001000065	26.2022	54.9483	30.1672	36.1772	26.9656	32.3959	29.6255	53.5961	26.9166	45.7502	39.6529	113.463	139.495	100.449	97.658	105.834	161.899
NM_001000066	18.983	53.3178	28.0211	47.5449	31.6158	34.2393	52.3854	21.1882	27.9883	62.8953	33.6885	117.621	107.254	80.254	80.3188	157.16	183.284
NM_001000067	24.5969	33.9765	31.9622	24.7653	30.3482	29.014	26.0323	30.5346	30.8525	42.483	30.7655	76.3966	66.1322	83.2034	52.3226	103.344	92.2343
NM_001000068	16.7189	40.5313	21.8155	36.7713	24.8178	24.6873	23.1162	24.2793	35.2675	75.4405	49.4387	168.621	191.008	166.33	75.7144	103.179	198.362
NM_001000069	15.6954	24.0438	24.5338	20.2689	19.3048	14.6834	24.3089	18.3299	26.0808	27.5409	18.7236	90.4241	76.9363	59.4284	62.0012	41.7288	84.2231
NM_001000070	27.8271	61.5324	47.5899	39.7307	40.8248	40.7088	44.8416	33.3641	34.4261	49.7191	59.4192	81.7454	152.209	116.059	118.4	86.1241	141.414
NM_001000071	18.4545	35.8859	23.3557	20.7175	18.1176	16.9456	15.1966	15.1692	20.7416	23.9028	27.9781	97.1512	108.643	125.597	79.2204	52.7981	118.077
NM_001000072	18.8948	36.087	29.0561	39.2776	21.6084	20.5103	22.8234	20.8672	17.2364	30.0283	41.0571	59.1798	75.4894	74.8096	59.8328	47.6353	194.289
NM_001000073	15.4251	30.447	17.4043	22.3539	17.7134	20.6899	20.7549	16.9478	19.8422	33.3619	33.0637	67.2865	101.291	70.3958	61.4806	61.0254	79.8926
NM_001000074	77.6552	137.075	108.427	133.811	86.6053	89.2693	79.9778	87.0365	95.5918	160.876	109.592	187.935	289.912	131.653	214.224	189.308	410.738
NM_001000075	34.3982	20.3123	24.0652	20.3259	28.6072	43.2319	21.0355	20.4372	23.7795	27.2575	31.6751	117.42	100.144	155.483	129.33	112.831	85.8091
NM_001000076	21.0538	20.8072	24.5006	36.0836	26.3805	23.8346	25.6667	21.9172	24.1493	31.5836	21.4114	82.7155	94.2282	89.8686	98.8797	82.6749	159.981
NM_001000077	66.7	255.906	118.694	151.424	97.1382	61.5975	54.997	81.2969	84.9554	190.776	192.566	501.084	673.271	428.426	400.516	385.872	996.812
NM_001000078	53.1108	140.66	82.1247	95.5705	62.2398	58.6818	62.6414	65.5154	62.8765	83.9215	84.4017	114.293	184.01	207.032	168.219	129.619	242.386
NM_001000079	25.4527	110.837	45.4273	44.405	34.1578	37.3735	44.2722	44.7792	34.2904	92.9187	100.455	90.7273	228.95	84.6646	67.8716	94.9314	212.479
NM_001000080	16.9767	59.2355	30.0371	32.7366	27.6446	24.0432	20.7912	16.9845	13.198	30.8818	34.265	79.4098	85.9619	72.3961	73.065	58.9423	112.429
NM_001000081	20.2118	25.872	24.5146	21.8605	18.2499	17.9391	17.7591	15.4271	15.7872	17.3949	24.3379	83.6451	115.841	113.509	69.2844	97.087	115.417
NM_001000082	32.2447	34.4662	28.2535	34.0981	31.3927	27.7993	35.7465	51.6975	53.8142	44.3004	31.9107	96.6316	105.196	118.699	75.4236	88.8759	81.0655
NM_001000083	60.7499	72.7858	68.4138	64.56	72.9464	61.937	70.9196	65.6015	49.7299	59.239	57.1402	222.292	344.227	288.703	228.078	178.489	278.607
NM_001000084	37.4055	63.0464	41.568	48.4101	30.0085	32.526	32.6081	33.1459	33.194	39.8929	50.5031	70.4291	116.459	101.554	69.9178	77.8169	94.911
NM_001000085	19.4576	26.028	23.0097	33.9436	19.0806	20.0096	18.2396	17.7198	23.8686	21.8286	24.5431	62.9935	66.5693	91.2937	60.9824	55.9172	85.9684
NM_001000086	15.6492	22.7214	21.4762	22.6481	22.0603	17.9795	20.9077	21.4176	17.1461	19.9475	17.77	65.3526	113.168	90.5195	79.4541	207.57	68.3495
NM_001000087	22.3293	53.3278	32.7749	28.4611	31.3682	26.7871	36.4823	24.6889	39.3172	28.217	23.1698	203.534	219.936	254.127	301.248	192.408	284.563
NM_001000088	24.3159	32.9198	20.3517	27.1898	21.4038	33.4025	22.4496	28.0071	42.8866	33.195	22.1298	87.9168	79.6195	75.3921	67.9855	53.7145	65.7289
NM_001000089	20.3349	28.2991	27.0652	27.282	29.4276	29.3845	28.7242	22.6932	22.7172	29.2381	30.4636	124.264	165.632	130.716	113.943	201.563	154.881
NM_001000090	16.6647	26.9921	22.0733	16.0749	19.2733	18.1579	25.1455	24.4912	18.9429	32.476	31.1065	71.553	98.1785	95.5142	95.7392	72.0013	94.9577
NM_001000091	13.8292	13.3014	14.2841	12.6901	16.1767	13.2709	12.9751	13.0701	12.9518	13.069	14.0479	50.5548	81.3992	62.6303	63.1023	60.8855	52.0399
NM_001000092	13.412	14.9511	18.0616	14.67	17.3877	25.8168	21.6593	16.6569	14.6334	25.036	19.2119	91.6244	72.3867	84.2176	55.1716	55.6041	70.3113
NM_001000093	15.8347	15.0457	15.5778	15.9258	18.8375	13.0366	13.1218	15.9801	20.2512	19.5791	19.3436	69.1261	111.217	51.7104	70.7199	54.271	67.459
NM_001000094	41.2018	81.215	62.5405	58.8925	35.1242	37.5804	35.3928	37.3137	27.7953	70.2109	39.7695	146.106	166.707	134.876	143.798	134.257	213.914
NM_001000096	14.6206	21.0579	14.7536	16.4343	28.2899	16.7091	21.0409	12.714	15.2283	19.1729	15.9085	109.742	113.193	110.598	138.601	77.2616	126.712
NM_001000097	18.5794	31.8061	32.9562	23.7894	36.1434	34.991	28.9022	32.6388	19.8638	53.6468	36.6467	83.1701	124.378	80.111	70.4009	76.975	97.1034
NM_001000099	18.5449	22.5053	26.3565	25.4603	25.5576	24.8021	32.6195	23.398	27.552	19.1976	26.9424	166.489	165.686	275.827	253.805	143.766	277.339
NM_001000100	17.0802	30.3073	25.8936	27.2354	42.0411	33.9727	36.1425	32.6111	29.7923	25.4051	20.1939	151.614	191.562	181.265	123.016	154.485	300.163
NM_001000101	176.012	311.914	234.773	234.296	196.213	145.706	223.242	226.39	178.442	229.684	154.378	681.662	1286.2	829.116	857.011	636.111	1038.01
NM_001000102	15.1242	26.5866	20.6973	22.5091	21.2799	16.6753	17.0724	18.4363	17.6209	24.8366	21.11	91.205	147.913	117.454	132.29	84.5198	255.154
NM_001000103	16.628	20.3073	17.8258	14.3625	21.5141	23.1554	21.622	21.2535	20.1552	26.1111	25.5769	94.5203	72.8443	75.1162	64.5174	66.2679	80.208
NM_001000104	17.9389	22.6591	22.0147	31.6908	20.3766	20.4026	25.9159	30.1704	22.494	18.0159	13.6115	99.2519	106.358	101.164	63.907	65.1708	76.7219
NM_001000105	17.8526	33.5284	23.5894	22.4075	19.4681	21.4286	26.523	18.3657	14.1484	35.7222	24.0391	64.7775	78.1895	63.5505	67.9316	76.4735	69.5438
NM_001000106	15.0188	15.1298	16.1416	15.6962	13.0441	15.3708	12.8115	18.8702	14.5538	15.6352	16.763	50.9999	50.9644	61.8905	57.2612	73.8194	48.3618
NM_001000107	15.9604	29.8831	16.9794	16.1384	16.9665	16.6939	16.649	15.2653	17.5711	22.3183	19.1834	55.4616	53.1154	53.6751	59.852	55.1206	59.3422
NM_001000108	11.6421	11.4598	10.8434	13.227	15.3792	17.1097	11.3327	15.9983	13.3388	19.3572	13.5696	62.3434	65.4331	59.527	61.7415	61.1191	73.9981
NM_001000109	27.0424	35.5878	28.4072	26.3692	33.7315	26.2475	23.6591	25.2487	26.0125	26.7122	39.3673	121.8	135.963	103.339	125.818	105.731	147.716
NM_001000110	39.9886	102.551	61.47	64.8452	61.1398	48.3264	63.8964	53.2168	38.7014	46.4472	25.9866	143.869	113.386	166.015	122.394	135.788	148.478
NM_001000111	36.6806	93.9296	53.1097	55.3983	38.1836	34.6368	51.0713	28.1126	26.8245	54.4533	33.4046	165.646	171.724	160.98	138.155	154.241	313.233
NM_001000112	23.6843	132.529	43.3125	43.8559	44.3733	38.6505	46.4265	25.706	33.8686	57.1483	42.3475	68.044	96.5396	59.0004	66.5082	73.7091	93.4283
NM_001000113	20.7953	38.6508	26.8546	24.3266	25.7052	24.5144	23.1809	19.3516	18.3149	27.6814	19.1577	83.6471	109.432	64.6373	73.7316	71.5136	108.609
NM_001000114	70.1961	192.946	100.658	111.687	87.6662	90.3615	71.3425	77.74	67.6793	108.897	116.622	205.258	334.298	327.321	236.698	218.529	351.615
NM_001000115	41.997	72.694	39.4813	44.9529	31.0104	40.7337	40.0285	33.22	28.7899	55.5164	31.5898	101.082	77.1433	85.1206	79.8124	61.9978	123.178
NM_001000116	16.1143	21.2759	17.1023	15.7618	20.904	18.4771	21.0242	13.88	17.8087	25.0137	17.221	51.1432	67.9408	52.8849	86.2764	47.9011	57.8605
NM_001000117	29.6282	35.6666	28.0783	22.2301	25.4559	26.483	32.0216	21.4673	28.3218	35.4589	29.8399	128.441	182.78	169.155	117.475	82.8216	101.228
NM_001000118	23.7587	36.7296	32.5437	42.0376	32.5283	38.0032	57.0547	56.1117	50.95	69.4344	41.987	119.273	137.868	151.796	149.576	142.965	216.283
NM_001000119	23.247	45.2328	26.1557	31.6987	30.0286	39.9543	24.5881	37.2747	36.3135	47.4616	46.7672	97.1689	110.414	76.5297	64.3166	103.878	105.102
NM_001000120	45.9651	34.805	50.0911	33.9639	25.9616	23.3745	25.3629	35.9095	30.6925	43.5377	32.8677	219.087	167.965	182.392	177.675	151.376	191.521
NM_001000121	36.4706	79.5904	138.709	110.511	140.008	136.764	126.373	103.722	119.983	120.678	168.027	288.514	580.219	347.195	292.255	330.342	400.528
NM_001000122	18.9291	45.5534	29.9934	28.1194	28.9403	27.6831	33.4667	24.6071	21.2822	33.0471	19.6553	229.415	92.3384	104.823	98.3048	105.67	145.044
NM_001000123	37.6456	73.0774	47.2425	58.931	54.0921	54.7369	52.6628	44.6074	39.4555	48.7637	75.4224	159.377	122.384	84.6031	128.527	95.2651	146.223
NM_001000124	27.3625	52.5301	28.7605	25.0519	45.6405	44.0128	53.89	45.843	31.5201	49.2544	43.2514	82.3058	136.183	82.4251	71.9985	72.1248	163.588
NM_001000125	166.584	424.175	274.105	253.617	264.385	170.273	208.357	288.051	212.943	281.778	141.048	335.65	609.816	352.745	300.101	265.694	477.701
NM_001000126	61.0112	70.7843	42.8014	46.5061	75.1031	92.7675	99.2824	104.182	124.835	123.371	96.5056	311.009	149.933	157.002	115.392	206.2	106.266
NM_001000127	14.8333	35.6481	22.1323	19.9118	14.5649	13.7086	18.9062	19.2559	16.4576	19.6521	18.7023	67.8872	161.347	110.347	67.7563	104.588	81.1065
NM_001000128	23.763	51.2344	39.5473	27.0383	27.4503	47.3819	27.672	30.325	26.8927	34.7789	21.6774	92.9294	85.2479	87.851	129.199	90.4666	129.496
NM_001000129	33.9846	116.639	53.2404	61.5372	31.8091	23.544	29.5824	35.7734	25.1764	55.4237	54.3765	179.99	181.446	124.301	89.323	93.7106	350.411
NM_001000130	24.1809	85.0813	45.6957	51.6488	32.5873	42.3045	35.7533	42.8346	36.2443	51.1493	50.0091	138.797	145.299	266.29	163.895	117.05	221.359
NM_001000131	16.7374	26.7417	26.7368	25.4866	20.3157	16.8939	14.9097	16.6026	14.4987	25.462	27.0419	65.2018	127.112	75.1152	57.1898	73.3717	76.7636
NM_001000132	24.7762	110.51	54.0213	61.7797	59.1462	43.946	43.3625	30.6823	35.5116	64.298	50.761	86.1862	179.657	164.233	111.211	147.167	192.505
NM_001000133	79.0343	151.181	104.239	91.7348	90.2291	87.9697	84.6351	78.3711	75.6527	73.7767	106.994	337.185	359.957	274.324	251.619	281.395	382.776
NM_001000134	28.9653	95.6363	53.5388	37.5159	45.4588	29.651	50.2009	45.9076	26.1842	72.4185	65.3582	75.9884	145.018	124.388	80.6459	97.9031	120.421
NM_001000135	24.2815	38.4867	28.8489	29.2945	33.8738	24.8794	29.3571	36.5061	32.1912	43.0605	36.2414	79.3945	113.844	94.9421	97.0697	67.6436	116.996
NM_001000136	32.8865	83.5959	38.0027	46.2884	33.4235	24.5517	23.2527	32.4356	30.0051	41.68	45.6138	89.4041	112.062	124.093	107.255	102.766	148.867
NM_001000137	14.4401	23.9644	20.4679	16.141	14.5655	13.8101	19.2898	19.5448	15.7491	20.4886	19.4015	67.0222	97.879	66.27	71.0266	73.7185	83.6164
NM_001000138	16.5424	28.2427	24.908	25.3952	26.0235	21.9269	29.3981	19.6272	16.541	25.077	25.0384	112.437	119.702	102.369	97.7137	114.135	157.448
NM_001000139	29.8181	59.0721	37.8479	37.8523	40.2334	35.9413	35.895	36.1747	30.5232	51.3371	37.0193	119.682	146.903	201.68	133.194	134.25	221.947
NM_001000140	27.1944	27.6774	18.1802	21.7507	22.5304	32.1968	34.9021	27.9706	21.1836	34.0789	26.6668	74.2952	84.034	61.6079	86.5642	73.8801	67.2936
NM_001000141	25.8383	40.8304	32.5145	34.2572	31.1539	26.3389	29.9158	23.0356	37.0517	35.2206	35.2058	79.3371	69.7551	70.2768	68.545	71.8347	88.8266
NM_001000143	18.3795	22.4551	20.489	20.6159	18.9669	12.5824	17.475	21.6003	17.9012	16.3041	17.6905	96.7008	83.2999	163.392	82.7641	67.3299	94.9108
NM_001000144	41.0763	35.9234	36.6595	41.1092	20.7715	18.4152	25.4339	33.3213	26.6001	23.7324	21.6431	181.232	226.877	155.068	199.956	163.046	231.688
NM_001000145	24.0806	56.5062	36.1804	27.0882	34.2579	29.2289	26.9065	24.4848	24.2163	39.5015	28.6329	131.768	210.837	133.158	113.751	171.772	188.978
NM_001000146	38.6213	63.1193	35.1519	36.2553	44.8905	43.9359	73.0463	38.2691	35.1279	60.9118	37.5986	121.635	129.306	146.974	78.4342	88.6716	82.6647
NM_001000147	17.4314	23.0233	18.0399	24.3467	19.8534	21.3417	19.5361	23.8209	17.63	33.4592	33.983	73.6164	100.256	99.6616	74.4717	71.5377	92.012
NM_001000148	17.6157	16.8437	17.0105	14.3244	16.4367	20.7915	18.5902	17.2014	13.3425	19.8639	16.203	124.608	106.284	103.061	125.482	98.6508	119.918
NM_001000149	24.2252	41.1116	28.1047	31.4333	31.3214	34.754	35.2422	27.2415	23.9416	33.7749	35.3046	146.19	134.234	120.559	119.784	125.01	144.744
NM_001000150	14.1873	20.5282	18.8224	19.5661	25.0702	19.5033	17.5595	16.0869	17.462	19.0464	17.2357	47.4677	75.2844	58.498	59.4846	60.1063	54.642
NM_001000151	30.813	46.0156	37.2197	40.8049	38.1597	39.4934	41.3981	28.4382	32.4926	41.0888	41.6482	110.404	136.625	135.255	161.776	67.4633	125.47
NM_001000152	21.7057	39.1213	23.887	39.4746	27.2821	26.1394	25.3163	23.7147	37.6729	40.8561	36.9733	100.975	149.081	151.887	100.721	203.768	215.889
NM_001000153	14.9193	24.4143	24.623	25.1311	16.5411	12.0656	14.8007	17.6696	20.9355	19.8941	28.1362	60.0542	70.1543	62.5945	77.5599	54.5664	76.0359
NM_001000154	66.391	197.13	83.2597	86.326	101.677	96.8286	85.7835	86.5666	83.9233	138.117	122.323	260.421	201.203	249.733	299.916	180.21	317.996
NM_001000155	16.5345	17.4019	19.3091	19.3557	23.7607	18.6857	21.9532	27.1592	14.0267	15.233	15.7997	71.038	68.9536	169.508	85.1234	58.8182	87.9893
NM_001000156	55.1995	125.774	89.2742	59.9892	61.5412	73.1272	69.911	64.5666	58.9229	112.431	99.2877	111.181	143.022	165.01	199.563	126.992	234.687
NM_001000157	28.9216	37.1382	34.7694	24.1638	25.8316	23.2787	28.8039	27.0301	17.8394	34.9083	42.4462	91.0435	149.524	77.6994	102.491	70.1719	73.3674
NM_001000158	19.577	24.577	19.3394	17.1884	16.5661	16.2512	16.2062	20.9659	16.6204	17.0754	22.2799	60.6737	83.7602	55.7414	55.8952	97.7668	58.7688
NM_001000159	18.9427	24.2219	35.4605	33.9853	29.8693	26.9765	24.4674	34.6766	48.8987	33.6069	29.1261	163.184	104.78	152.072	292.151	86.8763	184.725
NM_001000160	27.7378	67.3549	30.6985	32.3172	33.256	31.0462	35.8157	33.705	32.3387	37.4947	37.4151	95.587	125.026	92.2359	126.718	103.824	107.146
NM_001000161	79.2649	315.571	123.314	135.993	97.753	74.8463	95.7316	88.5309	86.2847	164.163	145.048	159.801	417.653	200.854	198.371	233.898	448.831
NM_001000162	63.5538	266.158	105.271	82.2557	76.9891	105.087	83.8952	83.103	70.578	157.039	124.158	106.852	204.938	108.369	97.5075	105.08	185.523
NM_001000163	40.4841	184.818	86.5816	84.3993	73.2751	81.3411	65.5259	73.6563	54.5192	100.102	68.8233	217.576	263.812	118.163	224.462	151.5	228.415
NM_001000164	22.7548	25.058	16.2683	21.6531	15.3862	15.2064	15.9472	20.4839	23.2655	22.0463	23.4235	83.408	148.2	106.544	91.6698	95.1797	94.7585
NM_001000165	49.6065	90.6573	66.8863	61.0127	72.5283	86.3052	95.4688	78.2223	79.1661	77.5215	65.678	152.527	194.884	223.87	170.225	142.947	217.655
NM_001000166	10.2629	15.1687	13.312	12.6909	12.5826	12.0301	12.4458	14.5038	12.5738	13.2582	16.9381	50.0857	58.5701	52.1245	65.4998	42.3195	57.0777
NM_001000167	24.8989	46.6695	26.3839	32.4173	22.2838	19.4036	19.9667	22.3854	20.7256	37.379	33.675	111.404	100.683	108.841	104.722	104.633	207.804
NM_001000168	50.4219	94.294	67.1877	64.7085	87.5923	70.3593	67.9086	48.2252	66.1753	83.8309	116.707	145.566	168.363	276.26	113.958	240.555	259.602
NM_001000169	49.3073	70.1888	66.7896	77.7689	72.3582	62.5469	69.6998	78.1776	62.5219	68.487	77.6927	260.174	213.692	159.724	199.982	157.17	241.12
NM_001000170	27.0734	89.9623	48.4601	50.9481	48.9981	30.2071	43.766	48.3379	40.5926	66.2917	69.9714	181.682	168.353	164.46	87.4265	126.763	194.84
NM_001000171	39.4812	90.3395	44.8335	48.6483	42.9433	45.8442	53.8157	38.6313	30.6834	69.1163	65.0381	156.698	179.25	161.661	86.9671	109.269	247.779
NM_001000172	30.5458	72.6276	41.397	40.1746	26.2013	32.6866	28.8769	22.7851	24.9405	34.1097	29.235	108.303	124.297	98.6847	82.6135	74.4621	143.975
NM_001000173	25.4887	87.182	27.305	50.4894	33.4201	21.2039	21.8904	23.4999	29.0794	61.3486	48.6693	98.3668	165.162	116.494	64.9552	168.17	181.428
NM_001000174	21.4231	56.4427	32.0307	25.4781	22.8248	21.3407	21.7287	24.062	28.7328	48.6768	29.647	107.042	153.69	125.71	120.369	78.9277	168.296
NM_001000175	35.7653	69.8184	52.0903	46.5143	35.2585	27.3154	28.9984	26.45	27.0559	44.9012	33.4922	97.856	101.829	73.5076	45.6644	100.409	96.3673
NM_001000176	21.8826	36.0561	21.7249	23.3671	41.6839	22.0463	23.5771	22.8025	16.5282	26.5434	32.9104	55.0939	88.5377	93.4235	273.822	66.4401	100.038
NM_001000177	43.8604	112.23	53.3569	48.8498	39.6433	29.9231	43.924	46.0774	35.1545	54.5593	57.7739	144.097	169.523	114.983	142.435	114.978	254.798
NM_001000178	17.2022	48.3495	24.3147	32.9775	43.0325	44.639	40.8577	23.6058	22.5022	26.3041	28.2806	53.1934	97.8307	97.1655	57.0892	54.1208	79.9011
NM_001000179	12.7883	21.7946	17.9061	15.5597	20.5627	20.4493	12.5099	15.2986	13.0675	21.2709	23.5226	111.174	85.6914	134.142	65.5598	188.5	97.6255
NM_001000180	25.7174	45.8195	38.7088	35.0191	28.5639	28.2657	27.9613	29.9028	29.1501	34.4067	42.5189	82.9332	87.0952	65.4153	105.683	87.4358	99.322
NM_001000181	30.9771	47.2804	30.6873	32.0614	38.0766	36.4362	32.7707	24.971	25.7941	45.1457	35.9007	138.884	136.124	133.921	124.711	165.711	179.426
NM_001000182	34.4737	45.8543	48.1334	37.889	30.4499	27.1986	29.3347	47.039	30.4349	54.3891	47.3522	98.8743	134.509	118.955	156.014	132.833	177.699
NM_001000183	27.0528	65.3616	35.4811	43.4691	40.8401	26.327	33.8503	37.9595	32.902	59.5312	36.8845	136.827	252.404	156.544	134.06	112.735	187
NM_001000184	14.9932	24.2263	16.8346	16.2908	16.5563	16.3463	12.5927	15.811	18.9606	19.0882	29.6293	66.9368	56.0501	64.57	60.9179	56.2887	66.1206
NM_001000185	23.0502	36.1584	21.8555	26.4593	21.8249	23.6475	25.2361	26.7653	23.0898	36.0254	32.4217	59.1337	69.4795	73.0316	52.5178	64.6677	105.819
NM_001000186	28.8318	61.9236	43.7048	39.7121	33.4965	27.9488	30.5014	39.862	29.5828	55.1749	62.3312	81.9474	107.677	66.9214	59.794	78.8192	156.147
NM_001000187	33.0524	68.8126	37.5837	37.5188	32.9534	34.2852	38.352	29.4245	26.3653	53.0703	40.69	95.0348	142.991	103.219	101.825	92.1813	126.561
NM_001000188	21.5621	72.7289	41.539	40.2557	33.1197	32.3886	31.6043	32.6378	26.7987	60.4134	45.697	85.736	219.089	91.8139	121.859	81.0052	160.969
NM_001000189	19.146	47.4064	26.4184	27.0125	31.5122	31.532	25.4622	32.3003	20.4231	32.0316	33.0867	80.6697	110.183	74.0409	84.1651	86.6903	105.655
NM_001000190	21.6322	25.1858	22.8841	42.7687	24.4954	22.6159	28.3344	21.4791	31.5313	22.822	22.3514	173.122	106.401	108.688	113.916	81.28	91.0289
NM_001000191	99.9287	147.037	131.743	120.713	88.0719	119.925	115.251	98.5059	102.195	105.28	72.6017	290.11	281.287	247.48	420.952	225.784	436.608
NM_001000192	39.2289	52.7097	33.71	40.0042	48.8852	49.5524	64.0221	61.1327	38.2354	63.4177	57.7127	91.1592	140.383	92.6214	104.349	96.1558	148.011
NM_001000193	20.626	38.8418	29.9657	21.7854	19.6312	18.0259	15.4234	26.9959	23.7591	32.3144	31.7456	116.501	130.01	140.99	94.7295	94.3543	178.189
NM_001000194	27.6543	35.4867	29.2614	33.2101	39.0616	37.5779	39.6968	30.8203	29.991	28.3744	33.4546	151.284	147.999	146.934	172.949	107.549	92.2957
NM_001000195	13.1095	21.2169	16.8847	16.0836	12.6604	15.4312	14.5465	15.6805	12.1221	15.097	12.5284	67.5612	73.297	82.8055	66.8614	69.4547	71.74
NM_001000196	24.7935	61.7801	45.1223	36.1713	25.3165	23.1524	19.1423	21.6572	22.64	44.781	36.0464	81.5025	118.43	108.111	143.299	118.326	136.925
NM_001000197	41.4734	95.241	87.2926	67.4932	98.1142	73.4602	84.0012	58.7625	62.6987	84.873	79.4864	144.681	174.033	197.767	72.0112	127.643	132.266
NM_001000198	28.0382	31.5686	29.7076	21.5161	38.0693	38.2792	24.1815	30.8572	29.6536	28.8827	28.9955	73.5146	183.832	183.747	149.709	187.284	204.843
NM_001000199	21.0872	37.0385	27.4068	25.9184	29.1654	34.1986	33.7264	33.6117	30.2445	29.2937	30.4674	127.757	155.513	91.1528	133.452	94.385	149.054
NM_001000200	175.518	459.863	291.684	258.371	308.089	324.955	326.989	274.898	232.097	213.788	177.093	446.174	673.648	605.354	660.463	426.269	784.955
NM_001000201	33.9165	50.5791	31.6366	28.9412	27.9915	30.9546	26.5002	23.8778	25.8792	43.5768	37.4668	76.2431	86.633	67.6385	96.839	62.8679	167.233
NM_001000202	13.2517	48.7555	19.7185	19.1823	28.5341	15.3843	22.9481	19.4307	19.5958	17.6653	22.1707	68.1341	92.7335	93.6134	89.6413	81.5779	83.6013
NM_001000203	22.527	65.7864	40.7343	39.6714	31.3764	30.801	38.9926	47.6493	44.6137	41.4671	37.512	185.927	158.181	142.674	172.382	128.805	236.904
NM_001000204	29.9549	43.4307	37.9881	36.206	33.1349	38.4583	40.4825	34.3098	30.3057	36.1454	40.3596	170.457	190.809	142.934	239.981	140.556	223.67
NM_001000205	10.0587	11.5024	9.5493	9.7635	12.2673	10.3109	13.2899	13.019	10.6691	12.0726	11.3232	52.9804	44.7907	41.3418	51.2744	39.2482	58.5599
NM_001000206	21.5743	32.6955	26.1917	35.546	29.9014	28.7034	28.7135	26.5221	26.0289	33.9648	32.6513	83.3119	99.3801	75.3731	76.5014	109.786	94.9401
NM_001000207	17.7145	48.4531	23.2067	32.7076	25.2124	30.6559	28.4337	23.71	28.1662	42.8392	38.3235	71.6178	117.74	111.657	105.861	88.5271	182.192
NM_001000208	24.911	35.4665	28.6394	27.8934	34.7203	32.2128	26.8654	22.3873	24.8991	25.1918	22.0364	45.5586	87.8359	78.4418	63.907	58.2052	67.018
NM_001000209	47.1272	191.161	72.8709	99.1816	107.39	67.9711	104.36	74.3654	97.1222	138.082	75.5152	208.238	280.113	243.304	201.063	225.039	344.502
NM_001000210	14.4818	23.4084	16.7195	19.6214	16.8675	33.8839	15.068	23.5127	13.117	17.5605	22.3272	48.2173	105.316	114.072	56.6042	77.4437	78.9884
NM_001000211	19.3751	37.2358	41.4047	29.8881	25.9919	24.0933	31.3144	33.0673	29.2682	33.0935	33.0127	78.5521	206.348	140.223	99.1048	117.476	107.667
NM_001000213	17.9548	31.976	19.2335	17	13.7467	15.3908	19.0716	20.7717	16.2889	28.6905	20.4669	53.0127	72.4944	60.0766	87.1568	81.0403	74.2258
NM_001000214	21.4505	29.8907	19.6109	22.5965	18.0222	16.0644	20.6214	17.7122	17.7098	19.8961	21.5237	67.0786	76.6026	83.0098	66.5439	66.7155	89.1244
NM_001000215	11.3304	16.0119	12.2845	13.8628	14.0613	11.6936	10.7029	10.9293	12.3645	13.7206	12.3172	45.3236	75.2907	64.0457	57.163	64.0586	55.9707
NM_001000216	16.1996	15.7313	13.3953	13.5555	21.6511	16.9775	16.0627	16.3968	15.1311	18.2346	16.8692	141.046	53.5512	72.2129	76.9776	88.0163	63.6885
NM_001000217	11.6278	13.7512	12.936	11.818	14.8364	13.4413	12.4044	13.9696	13.8183	17.0902	13.5469	67.4216	67.601	65.4296	58.5545	50.317	84.0744
NM_001000218	11.9164	13.8588	16.0868	16.8233	29.0988	14.7041	16.4862	16.7123	15.6565	14.9698	24.2816	153.245	207.026	302.169	189.854	284.716	212.707
NM_001000219	16.1244	25.0681	20.4684	20.9264	16.0603	17.1211	14.2822	17.2188	14.6169	19.2205	17.1106	95.4949	123.367	135.213	84.1137	93.3418	140.324
NM_001000220	29.6341	51.7309	45.5026	28.1926	42.3892	48.0306	46.3723	54.2362	42.93	63.6575	47.6155	175.85	212.621	174.329	220.048	163.771	266.955
NM_001000221	13.7993	18.471	14.3955	15.5428	15.489	15.7851	15.3641	18.7724	11.8695	17.2899	13.4039	68.9869	74.5027	71.2427	80.3214	80.6285	60.3418
NM_001000222	22.1097	33.8418	25.5231	22.9015	26.9555	21.9682	26.2755	21.5499	25.0236	25.0274	26.4535	49.1187	118.911	72.3962	58.4073	99.4982	71.5974
NM_001000223	27.9187	121.739	55.773	54.1811	45.5693	42.5176	41.659	34.2023	30.2648	74.1315	67.434	111.287	144.05	80.8596	66.1154	95.0292	188.878
NM_001000224	149.154	123.704	152.762	172.315	209.759	159.22	131.391	122.951	140.812	130.515	96.5882	421.569	585.311	657.344	727.094	451.995	518.107
NM_001000225	68.8951	248.595	106.841	116.178	101.531	84.4385	102.027	80.2354	92.3628	115.388	94.9136	137.491	249.3	101.376	125.268	129.8	205.281
NM_001000226	16.1912	27.168	24.6887	21.8204	17.7502	13.3549	17.4654	17.6045	13.8826	19.7865	16.316	71.7181	85.6751	68.3656	55.6585	66.6324	92.7293
NM_001000227	36.1774	59.5108	63.534	52.1001	69.2285	50.4614	45.7116	47.5714	67.9445	46.3987	42.4285	159.16	152.001	105.644	102.29	86.0167	214.725
NM_001000228	99.316	181.871	142.574	73.4745	63.5253	64.1944	68.9781	64.4593	90.9566	94.2026	48.5254	401.542	552.028	386.716	476.827	391.822	646.575
NM_001000229	42.9543	171.252	52.2648	62.8654	41.3627	41.69	43.8	55.4983	57.0976	68.5218	47.996	140.353	158.754	101.567	130.314	100.221	212.543
NM_001000230	23.5105	46.321	31.0596	37.7774	28.6557	27.0496	29.3753	35.4149	29.0854	46.7084	20.9871	108.443	120.507	108.171	75.0748	92.7639	133.885
NM_001000231	25.4286	72.8641	41.3898	48.6879	54.8379	53.4788	46.9585	36.4642	50.5142	52.6249	38.1813	230.216	361.935	200.808	207.447	228.62	348.363
NM_001000232	196.224	282.317	241.378	214.374	276.476	305.975	325.964	255.764	231.838	257.66	153.957	473.377	615.036	540.854	455.38	393.876	541.057
NM_001000233	74.4936	266.651	123.969	125.001	86.8782	90.8469	110.64	91.685	54.2334	125.25	99.1103	142.362	326.365	204.404	120.846	208.631	415.804
NM_001000234	14.11	16.0641	14.5054	14.6154	26.5114	30.6416	21.8558	22.9904	18.0891	28.2669	24.5746	73.2759	67.6251	100.689	67.0182	97.3835	128.478
NM_001000235	30.5351	37.0998	26.4843	26.288	26.7354	27.8649	29.1698	24.7875	24.1116	32.17	24.0343	144.386	143.559	132.358	126.435	110.18	168.418
NM_001000236	45.5427	197.472	81.1786	87.1834	65.5209	33.8703	43.2472	54.6057	50.6633	91.2332	54.9838	124.73	185.738	123.135	99.9885	117.714	195.23
NM_001000237	10.5665	29.6092	21.7485	17.4688	11.8193	12.9407	10.0804	12.8348	16.2455	16.5372	20.4174	72.0909	90.1338	101.841	51.9389	80.6924	68.2359
NM_001000238	37.6914	87.684	35.6398	42.8906	45.408	35.492	42.5165	35.2842	33.5084	55.8195	43.6148	140.351	320.971	479.375	126.73	155.386	274.427
NM_001000239	26.2537	72.7106	47.2357	50.2603	43.7709	42.3393	45.6517	43.0091	40.0369	60.3987	42.2782	72.0012	98.5063	73.2809	95.9003	60.7387	118.168
NM_001000240	30.5351	80.8657	56.0035	50.3201	45.0795	65.5452	42.2249	41.009	35.5729	44.1298	39.2808	217.59	273.812	188.836	167.639	231.278	449.535
NM_001000241	32.3041	78.7532	56.4657	63.8691	64.7599	54.3156	61.276	62.4475	47.167	90.0518	67.3762	117.892	248.649	141.85	135.72	129.833	248.183
NM_001000242	13.0373	18.4134	13.7211	16.0301	12.7523	13.8179	13.5275	11.8697	14.9975	15.2623	13.6991	48.4292	83.3015	54.0877	79.2065	63.8093	93.7867
NM_001000243	23.8239	52.6485	30.1764	44.3681	20.1918	19.2202	19.8133	17.2722	25.7738	26.6498	35.9308	134.8	163.35	152.645	117.646	139.82	275.755
NM_001000244	36.2781	70.0413	47.3825	67.9973	60.2503	52.189	52.8744	42.5986	42.3903	71.2435	75.9137	158.035	203.272	217.24	209.395	160.746	291.53
NM_001000245	22.8627	48.8511	30.9597	31.4798	27.9835	26.0198	25.7391	22.9897	18.3462	36.2657	31.5646	103.056	88.9014	110.885	152.908	102.646	180.605
NM_001000246	22.318	29.0431	23.5262	27.125	28.963	24.0824	24.4255	18.4645	22.2602	28.6712	24.6465	110.498	108.34	90.6867	127.552	98.6369	200.304
NM_001000247	115.501	249.458	133.759	128.151	97.0124	68.3117	89.6858	113.155	123.21	181.981	168.361	301.865	527.793	291.875	341.892	308.824	422.81
NM_001000248	75.9989	117.566	88.0861	81.7753	87.1123	78.2561	72.3415	91.3774	100.658	113.605	74.1351	442.477	322.12	304.65	255.127	277.52	443.209
NM_001000249	13.0237	22.3443	17.2913	14.4006	16.8717	16.858	15.5345	13.6721	12.8682	18.4425	18.2041	62.6679	64.8285	60.8006	62.6389	51.217	57.6263
NM_001000250	33.7013	41.5604	32.4217	36.2844	38.2992	34.37	31.569	23.5198	22.1759	35.2983	49.3691	126.041	146.361	103.623	93.1314	111.852	159.993
NM_001000251	11.5163	16.6548	14.427	12.8293	14.3639	13.9112	11.7548	12.8224	14.0545	15.1609	14.4854	72.0292	61.3947	131.799	58.8955	84.2307	67.3153
NM_001000252	51.6613	86.1789	57.306	62.7022	59.3857	39.6027	41.3612	52.0426	53.8328	70.4926	59.7889	252.949	268.204	207.469	215.123	159.92	563.413
NM_001000253	37.7041	39.4302	40.9847	43.865	31.5205	42.2407	26.3414	30.3228	32.3548	37.4604	32.845	84.7481	107.331	118.846	92.4421	103.038	80.2098
NM_001000254	15.6041	23.0642	30.9228	20.4105	29.1655	30.9692	26.7525	25.4723	25.194	23.6544	24.575	227.108	183.709	375.821	229.655	204.068	266.352
NM_001000255	11.3926	18.907	12.7873	13.6391	14.8391	11.4489	16.1404	12.4277	11.2566	14.8952	14.782	51.5386	55.0352	55.6646	52.2898	42.0119	53.0837
NM_001000256	22.9197	27.1374	18.2626	16.9388	22.0458	20.471	17.964	19.5562	15.5836	26.6186	24.0548	76.5269	63.2811	61.5322	53.7164	66.241	86.145
NM_001000257	26.4948	40.1429	30.9828	29.1071	23.3429	19.6586	23.8153	23.8701	19.0991	27.7228	25.2215	88.3092	129.393	72.2826	56.6312	75.5974	84.7232
NM_001000258	43.0186	78.553	54.0699	49.2271	59.7569	45.1834	44.6389	55.4063	61.7389	96.7119	85.7127	184.906	175.984	146.029	136.279	98.1708	264.931
NM_001000259	13.063	24.3658	22.1666	15.2415	12.9559	11.5508	11.1771	15.2939	22.1271	15.8079	19.0934	96.493	77.1224	74.3936	76.4656	64.9729	87.6212
NM_001000260	35.2763	108.606	47.1674	47.42	27.8708	37.237	27.6413	36.5227	35.5287	48.8199	74.099	127.882	129.362	78.5595	82.8668	93.4005	130.986
NM_001000261	47.0034	94.4152	53.8421	67.5326	38.886	41.7102	45.2359	40.6857	40.301	54.5261	86.0398	93.9424	170.188	85.4436	98.2174	89.6574	145.113
NM_001000262	18.687	32.5074	24.2012	24.3788	22.7192	17.742	21.4701	18.6272	14.2618	24.6396	28.8505	48.5822	83.9112	70.3681	84.3132	60.2362	81.0076
NM_001000263	41.8183	61.151	43.4825	56.2374	114.536	122.242	82.9439	88.5555	96.5009	83.7759	63.9646	265.908	338.389	308.902	246.575	189.208	427.842
NM_001000264	71.2032	185.543	70.0189	50.5687	70.9107	72.5022	103.154	87.0853	58.5168	106.236	64.0859	178.342	172.822	112.466	110.515	141.532	127.256
NM_001000266	16.4068	25.319	17.4146	14.7772	15.9291	15.5185	19.4355	15.3953	13.8094	24.0973	23.0012	45.0662	71.7524	51.7423	58.9529	56.0888	71.499
NM_001000267	81.0866	164.747	103.861	75.2547	132.337	95.7192	127.017	95.3622	78.091	79.3261	77.3903	201.437	232.231	213.518	239.238	131.93	414.658
NM_001000268	57.6315	299.088	111.876	129.062	104.098	101.162	94.749	61.8086	88.8874	138.601	109.985	210.992	540.4	286.775	121.019	187.591	480.213
NM_001000269	36.2828	133.428	64.3564	64.3643	61.2022	52.8373	69.9306	52.7506	44.5669	82.3069	54.457	121.265	250.22	149.16	101.782	97.9609	250.144
NM_001000270	34.7237	71.9849	36.9202	47.4103	34.552	33.4802	39.4013	28.9217	31.6348	54.8596	38.8858	74.286	139.103	70.4633	76.2211	105.254	119.338
NM_001000271	87.8619	356.636	160.645	140.613	195.559	113.819	186.113	134.829	129.103	208.48	195.189	279.932	693.265	257.267	175.312	257.941	532.141
NM_001000272	19.8725	28.2419	22.8822	31.4399	56.229	56.9139	43.7051	43.8924	52.3356	46.0911	42.9106	110.727	124.49	97.9827	153.766	158.895	158.364
NM_001000273	14.2239	24.9425	17.4381	16.5037	20.5653	17.0135	19.3243	17.5358	15.7606	23.1487	18.5513	82.9937	136.707	100.96	98.6923	100.649	144.307
NM_001000274	19.1297	50.7752	29.9429	23.4492	24.7706	25.5116	25.0264	17.2007	23.5578	24.2115	53.9316	92.6294	99.7253	87.604	67.3407	168.579	139.662
NM_001000275	17.01	35.4062	26.5316	25.6376	18.37	16.5926	20.7671	20.1511	20.9847	34.6583	21.4898	81.1651	155.362	78.3532	83.1905	58.7509	86.6651
NM_001000276	40.3588	73.432	63.4352	52.6733	72.829	55.563	46.8183	70.0709	60.8535	76.4624	95.2172	170.119	246.492	165.471	155.909	256.391	385.063
NM_001000277	14.6019	27.8895	14.7222	19.0086	15.6051	17.2006	15.9254	13.4957	12.3929	19.76	16.7476	117.718	156.537	155.784	113.823	126.523	127.343
NM_001000279	17.827	15.816	23.1679	18.6903	15.4488	23.6239	21.5224	33.2095	25.6874	24.9857	26.7551	64.1944	46.6418	67.2137	67.7396	64.6214	65.6767
NM_001000281	27.0093	29.4441	22.117	26.0332	24.952	26.3637	22.5922	21.964	23.0656	25.8008	23.8001	70.0709	110.712	108.466	104.929	124.294	159.376
NM_001000282	18.3388	17.1596	24.4413	22.8356	19.0898	24.9237	16.2034	18.3095	13.8836	15.583	14.2431	90.3722	121.049	64.8144	104.779	106.851	112.914
NM_001000283	49.4355	111.651	38.4408	47.5832	79.394	40.9562	28.2172	42.4491	37.8317	71.0164	83.3973	69.5759	162.606	264.516	78.0153	155.597	141.821
NM_001000284	11.9306	13.5936	13.1768	15.3172	10.8511	13.649	12.6845	11.7724	13.3635	14.2143	12.9312	69.6187	52.6198	83.4343	53.4114	54.9186	44.6781
NM_001000285	14.7818	26.7516	14.956	17.8234	17.9157	18.7077	14.5054	22.1587	22.9921	28.5423	30.497	60.7713	90.421	51.1944	100.201	76.1924	67.8326
NM_001000286	32.9768	47.2791	25.8356	26.7335	41.7884	30.4591	35.4858	32.7734	27.8265	42.8542	22.47	118.888	127.345	122.206	125.374	120.047	130.853
NM_001000287	11.9991	18.6347	14.9828	14.9997	14.7734	15.2612	18.259	14.4918	12.1841	21.4586	23.2604	54.2638	68.7805	73.0841	75.1499	56.2922	109.01
NM_001000288	20.9547	30.2496	26.3701	27.6805	28.0647	30.2933	31.2431	30.4802	26.1373	28.8909	35.9878	288.727	147.991	182.409	122.189	173.15	347.462
NM_001000289	85.7466	146.162	106.635	95.7682	93.8682	79.7599	101.349	69.7165	60.4159	98.4381	67.0626	122.279	134.135	119.988	123.118	112.535	123.899
NM_001000290	17.7813	34.6186	22.2402	28.6286	25.4954	29.0825	25.885	29.7624	22.2898	30.2269	39.4082	68.374	87.7767	76.9083	79.956	81.3768	95.511
NM_001000291	32.6285	62.5071	45.0059	48.3245	48.2363	37.9577	46.0684	36.0538	36.1974	60.743	50.0339	123.585	74.5027	69.9903	85.7516	93.406	183.799
NM_001000292	11.846	21.8855	14.2256	12.9101	17.422	14.9012	22.9002	14.4433	14.1567	18.1112	14.216	124.384	89.067	122.423	78.853	72.2546	99.5633
NM_001000293	12.9519	17.7114	14.4589	13.7722	13.0499	15.8899	16.097	16.492	13.3351	14.6645	15.9807	68.3876	60.1059	69.8761	47.6464	58.46	67.6008
NM_001000294	18.0514	25.2464	22.4338	18.7664	21.0787	30.7448	16.169	16.3527	16.4188	17.1971	25.4036	65.3453	66.9359	101.96	62.9846	65.595	101.137
NM_001000295	28.4903	51.2873	59.3536	59.4732	85.3278	95.9421	136.716	98.7962	73.9476	71.9264	59.1566	410.376	641.756	386.719	469.335	471.447	415.21
NM_001000296	32.5088	50.6061	41.9041	38.0389	40.8789	50.4547	41.7122	37.1985	45.1583	49.4615	39.9872	174.055	229.843	161.752	167.153	152.107	231.749
NM_001000297	16.3919	22.8802	16.236	20.5773	14.9847	22.4753	18.4787	18.3654	25.1434	18.909	19.8138	108.668	81.3606	98.4264	61.0262	100.036	106.642
NM_001000298	72.1073	81.2849	75.9106	98.6039	71.9448	84.3975	85.6046	85.5515	80.5033	64.3273	120.497	180.163	216.152	203.515	390.63	235.746	342.099
NM_001000299	17.7303	26.019	16.5408	16.4172	16.531	21.904	16.1423	17.8439	16.1519	15.9803	17.9504	52.8737	74.1223	51.0799	53.7744	55.0414	78.2087
NM_001000300	13.1891	23.6037	16.7443	17.4566	18.8618	16.86	14.9219	14.6463	14.1583	19.1934	16.3475	58.4791	88.8892	82.0443	46.5678	57.8998	56.0055
NM_001000301	11.004	13.5162	11.8586	12.6222	11.5616	10.6412	14.3942	13.1133	10.8107	13.1372	11.4091	77.3726	75.4716	48.5978	72.5652	64.8674	61.7271
NM_001000302	22.6715	33.697	29.6303	25.2907	27.229	34.0395	32.842	28.9847	23.983	39.8764	45.882	115.915	128.172	158.874	89.6485	156.844	104.847
NM_001000303	18.785	17.0753	17.4844	16.931	21.2308	18.9117	21.5698	20.013	17.2086	19.4125	21.5508	110.549	174.859	93.5689	102.343	71.9185	104.764
NM_001000304	26.0918	58.0095	32.1017	32.2269	32.2073	30.5493	30.1688	38.1061	23.8234	67.9507	41.8167	81.6196	108.379	168.179	90.3915	94.233	152.799
NM_001000305	30.9022	47.7402	33.8544	28.7277	28.5509	30.053	20.5987	19.6686	24.0166	35.0878	38.7668	128.708	155.949	71.6297	107.096	82.2979	75.5595
NM_001000306	35.6858	56.1531	40.9343	33.7004	38.7934	26.9803	24.8598	28.6953	25.6242	51.5573	35.1617	82.8621	83.9337	95.4849	99.3633	66.3033	75.5279
NM_001000307	50.0175	115.33	58.9502	75.7908	52.7838	54.9553	45.2007	59.5127	50.4574	81.2386	111.556	195.371	226.95	183.378	120.296	143.366	202.909
NM_001000308	19.1772	17.9283	18.5439	16.7858	14.9243	15.7562	19.1934	22.6097	21.9263	24.2498	23.332	59.3878	71.9649	58.6279	87.0785	50.4268	57.4763
NM_001000309	13.282	16.7511	18.3792	13.6573	19.7602	16.2366	16.0164	13.3676	15.2863	16.7171	15.8988	77.9843	74.9517	94.202	126.268	82.4727	147.898
NM_001000310	15.087	19.0164	18.4307	15.7254	14.9297	16.4845	15.2931	18.1311	15.4065	19.3666	21.6821	64.2323	70.9145	58.4531	62.7474	62.5972	70.8288
NM_001000311	12.3848	15.0734	12.9988	12.398	11.0994	12.3502	11.8253	11.8889	10.98	11.2365	11.8164	62.3881	69.2026	60.2066	74.5774	75.6859	59.4978
NM_001000312	15.2293	23.1498	21.4689	17.5334	14.9551	12.5401	23.028	14.2839	11.8582	17.8392	20.9167	67.2593	87.2304	74.3818	67.1217	117.612	137.161
NM_001000313	17.8192	14.9823	14.6593	16.1805	16.4937	15.6652	17.0129	15.4704	16.8694	20.799	16.0282	93.1177	75.188	113.364	73.1065	61.9845	58.4775
NM_001000314	16.1033	22.4309	16.3198	13.8315	15.0403	16.8256	16.9478	16.7447	15.4995	21.878	21.0783	76.4251	79.7647	61.3494	70.7791	64.0311	68.0937
NM_001000315	14.5453	23.5884	17.8336	17.5425	20.889	29.2346	30.0681	19.6472	22.2676	21.5116	26.8097	62.4589	93.6231	73.837	83.7355	69.0675	66.196
NM_001000316	19.5686	35.4457	27.0307	25.2545	21.2274	21.6242	24.7799	26.4643	25.3551	22.8416	20.1676	82.9293	145.02	75.7537	90.5585	97.7048	145.897
NM_001000317	22.74	17.1701	15.8818	18.9093	21.9641	23.5791	28.3744	18.9123	15.504	20.5793	23.775	50.2066	75.3501	60.9985	61.017	71.076	72.7002
NM_001000318	16.0236	16.3668	17.8056	18.5445	18.1471	17.6107	20.7969	21.1826	16.8391	20.2932	19.0262	76.9746	76.2776	82.4033	115.624	81.1252	82.4442
NM_001000319	26.0443	60.0805	36.5803	30.5752	30.6558	32.9214	31.9548	26.5807	28.3192	38.5672	38.1172	95.1593	134.284	197.228	207.561	112.291	259.439
NM_001000320	19.821	23.4137	17.5081	17.1858	16.1757	18.459	20.4813	17.0031	15.6846	23.7231	25.4048	95.1957	72.8258	65.2603	90.0723	62.4796	68.4975
NM_001000321	27.7972	87.645	43.6328	39.2474	27.0744	26.6367	29.5014	29.2187	32.9359	59.2338	56.5854	79.3921	137.137	69.4811	64.0753	96.3545	120.002
NM_001000322	25.9439	71.6319	60.7853	34.5273	38.9818	34.2888	35.9504	32.2294	22.9392	66.2339	42.8528	93.8704	183.075	100.177	124.225	123.317	281.798
NM_001000323	19.8087	32.8359	26.0764	24.1018	25.3802	27.2253	15.6951	18.4388	18.5484	19.8219	36.4543	178.525	92.4143	94.6607	118.431	125.253	168.711
NM_001000324	16.7711	27.0825	18.6826	21.0395	19.7291	24.0637	30.0797	29.5386	27.9149	30.4894	29.3994	63.7672	86.5523	78.3404	66.0687	82.4164	76.192
NM_001000325	15.319	20.757	16.9455	16.3057	15.4004	15.2827	20.1526	15.825	12.1992	14.3688	15.3213	47.8156	76.2936	71.7007	48.8462	59.4975	46.4123
NM_001000326	23.4846	31.8348	25.4959	25.4161	20.6562	26.0705	21.4593	21.4437	23.5376	25.7406	31.1684	113.484	192.735	90.5744	69.9257	80.1671	70.1602
NM_001000327	17.1587	16.5354	12.3443	20.4824	16.4267	13.4638	12.0611	16.0423	14.6713	18.0152	17.7294	54.298	55.5167	63.5992	69.1967	104.739	47.6846
NM_001000328	12.2773	21.7944	24.632	16.8076	16.4706	21.015	17.6424	18.2623	15.9602	22.8689	24.4558	75.4073	103.206	73.1985	67.7451	74.5673	85.8352
NM_001000329	14.9708	17.8036	14.9193	14.3798	19.1203	22.729	19.9069	21.2062	14.975	21.3744	22.3879	227.876	174.315	265.775	148.243	92.1529	108.287
NM_001000330	14.2594	18.7336	18.3628	16.9107	21.0906	18.2239	17.887	19.9256	29.4004	28.0618	21.1862	69.3328	109.952	170.959	158.29	69.9327	183.571
NM_001000331	13.4327	12.4393	10.5666	13.7916	9.7413	10.8289	11.0827	10.7004	9.938	10.4197	11.3311	89.0083	59.2198	80.2105	59.2093	55.7045	73.1578
NM_001000332	59.5929	56.6159	63.3785	39.2908	72.6413	44.5356	69.1332	60.0543	35.9399	71.382	39.157	168.845	179.525	109.005	115.511	120.419	203.104
NM_001000333	36.9462	78.1946	42.846	33.64	38.2828	26.3116	36.7055	32.8769	25.7067	58.0482	51.0795	77.8634	94.5324	142.208	63.9311	105.744	134.988
NM_001000334	31.1838	35.3121	31.8298	33.8191	25.6835	23.9188	33.3544	33.2917	23.2984	38.5117	33.9792	71.3659	129.263	136.956	117.369	71.7241	181.212
NM_001000335	30.7091	44.5465	35.4283	34.0904	38.0454	32.3208	34.9059	32.7692	32.1332	57.2105	42.3156	65.2468	85.1567	91.7285	84.7166	79.0433	116.416
NM_001000336	57.2639	133.96	91.4055	79.7375	107.881	108.466	119.93	83.8371	83.8313	117.882	99.2216	266.92	464.452	237.932	325.51	237.064	352.474
NM_001000337	12.8092	33.57	22.6793	22.5175	22.8165	24.4172	22.8209	23.7003	21.3923	33.7176	24.6956	94.4673	93.6688	90.0169	72.3452	82.4339	101.391
NM_001000338	22.1708	40.979	34.0774	39.1156	32.6419	28.1641	26.7269	20.5632	23.8437	36.6489	42.2197	54.7193	104.782	96.2044	80.7504	81.295	73.8907
NM_001000339	12.131	18.0856	13.0098	11.2871	17.0975	14.2884	13.5893	12.3597	16.1813	14.9509	14.2575	48.0966	62.4992	47.7438	102.066	63.2229	71.7051
NM_001000340	13.3469	14.6938	13.6243	15.8951	13.8721	14.7346	15.3748	12.5282	15.1029	17.082	14.6636	62.1701	125.013	82.1899	55.2591	64.5469	56.1302
NM_001000341	13.1895	13.9925	14.7954	13.5012	17.129	15.7275	16.3039	12.9144	13.3224	14.0953	16.3272	63.8959	82.2339	57.2044	63.7125	110.371	73.6972
NM_001000342	17.7978	29.2418	18.3265	19.9274	20.3964	19.1666	25.5932	19.7693	19.3276	25.9353	24.4604	82.9793	94.7531	74.7564	67.9065	89.3117	90.9494
NM_001000343	21.9136	43.254	29.982	33.5108	28.0906	27.0156	25.6611	20.9398	22.864	37.7163	32.7567	74.4256	96.8765	86.8901	117.972	93.9272	95.968
NM_001000344	22.3268	51.5566	26.7238	26.357	30.1942	33.733	22.0432	16.7755	17.6048	30.6535	31.1634	147.14	90.5772	84.4858	90.7357	98.1402	105.116
NM_001000345	134.739	362.144	255.195	238.105	113.663	118.093	110.982	191.725	177.487	249.366	192.016	380.75	476.217	531.594	370.853	423.215	582.44
NM_001000346	12.5188	19.2018	14.2583	17.4454	13.3935	11.7415	13.4115	15.3215	15.3782	15.127	25.4871	104.247	70.8634	74.869	72.3677	66.2897	78.9504
NM_001000347	18.1983	29.2946	27.0107	21.848	21.2812	22.1938	20.4618	18.6877	17.9315	25.4075	21.9521	81.3266	72.717	80.6483	91.3198	70.3561	79.9595
NM_001000348	17.1264	22.5076	28.231	18.2475	16.3279	19.0965	14.7618	17.4862	21.9314	22.8652	27.6471	70.9563	64.2018	64.0461	75.2624	69.949	100.979
NM_001000349	14.6135	21.3407	20.5577	15.7906	21.4769	19.1377	23.8886	18.9916	15.1084	21.8374	20.1618	79.19	117.482	154.493	95.6658	123.94	112.648
NM_001000350	16.7861	29.6538	19.2027	20.0135	23.1104	17.113	17.1916	25.979	19.2643	19.2247	24.5206	58.8007	49.8872	48.8637	65.1111	57.3571	60.9846
NM_001000351	15.3939	51.9557	21.4936	24.4688	27.6036	23.2667	34.6228	20.7244	12.6699	31.9559	21.0384	133.949	148.634	99.8897	87.8843	114.372	200.609
NM_001000352	36.3748	51.5413	41.3301	34.8645	45.5764	39.2212	40.2836	47.0497	43.9754	48.5022	44.3353	187.369	211.393	131.524	103.342	88.7871	193.148
NM_001000353	16.7995	31.8616	16.8556	21.0862	25.8378	27.6641	22.1884	19.483	23.0178	40.2971	22.6926	104.249	160.131	102.699	92.8133	72.8313	101.576
NM_001000354	18.9898	23.8394	22.3458	23.5218	20.0185	31.9508	20.8527	16.6397	25.3201	24.5831	28.4421	77.4251	71.9772	100.621	67.4638	97.0818	107.9
NM_001000355	47.7574	80.6033	53.6933	66.4221	69.2661	67.2739	71.4876	68.0423	51.1057	78.5399	57.5084	138.091	249.602	224.221	198.395	184.892	181.082
NM_001000356	22.4261	31.2763	21.8164	24.7652	25.8207	32.6801	32.8701	25.5222	25.1989	26.5784	36.6726	94.5982	162.103	173.098	99.6313	78.3859	96.9049
NM_001000357	15.6422	28.1529	19.0969	17.348	17.6238	21.5916	21.3584	20.7178	17.2842	23.6029	20.4493	60.3598	70.405	57.5926	57.9143	73.1662	94.2634
NM_001000359	28.7661	81.9619	49.7742	50.1866	30.593	40.4196	31.51	41.4749	38.4254	60.3631	61.8482	142.947	143.332	118.081	97.9573	94.4447	140.592
NM_001000360	40.0084	131.092	78.3969	59.3322	45.7999	46.8262	50.7888	49.7414	47.6149	89.5097	78.1756	86.6833	128.288	126.441	64.8729	100.651	160.562
NM_001000361	17.8224	22.8426	18.2328	15.5257	22.8866	20.6234	22.337	18.7228	15.9654	22.2991	16.563	107.32	120.09	88.3543	83.5163	96.6961	93.9125
NM_001000362	14.1416	13.9452	16.2687	13.3696	12.4746	13.7697	17.0396	13.4375	11.6568	21.4563	13.6918	73.8528	53.1467	84.4263	101.022	61.3442	58.4398
NM_001000363	30.8644	93.9394	56.6602	66.7751	43.7487	41.8611	59.1228	39.1405	41.1168	51.5315	54.0214	112.886	191.161	122.707	119.452	85.71	171.003
NM_001000364	15.7523	19.5333	21.2966	16.851	22.3848	23.6843	21.3022	17.3062	14.5734	20.2631	20.7085	60.067	78.7396	85.7465	65.1366	71.9013	76.8284
NM_001000365	33.3063	78.3753	66.1316	52.4806	47.6715	35.3685	47.7644	51.4358	34.6496	60.5332	61.5464	92.7214	119.095	90.5201	118.912	153.069	183.472
NM_001000366	14.6927	23.9839	16.7686	21.1464	17.4634	23.4875	19.4028	16.1464	18.8359	35.3095	20.339	77.7027	97.0826	59.2393	61.1264	100.719	53.3463
NM_001000367	13.2522	15.081	9.9598	11.2886	11.4772	11.3215	11.8922	11.0536	13.0419	14.4486	13.225	49.9187	53.7183	58.4728	59.6022	51.3881	62.9533
NM_001000368	87.9138	58.2769	31.9457	44.8032	24.4866	21.3962	25.0709	24.3388	18.549	34.5118	33.3508	63.3359	87.2631	107.059	75.5279	113.573	103.063
NM_001000369	10.8325	14.4408	13.3291	16.5787	17.8522	12.9408	11.7016	12.229	14.5546	11.2112	14.2229	73.3509	69.659	67.62	82.7145	46.6967	85.9477
NM_001000371	12.5648	14.2137	15.0255	13.1306	12.6109	13.4182	14.0869	13.4617	11.0784	11.4844	21.6124	65.2287	62.2575	70.8616	52.7499	61.2932	58.389
NM_001000372	16.9611	34.8208	26.2336	20.5369	22.1028	16.1443	19.2315	19.3009	21.1356	28.3862	31.4893	55.5189	83.2416	100.067	133.422	65.2062	132.603
NM_001000373	16.7283	23.8581	19.9689	24.2489	25.0899	18.3797	14.2369	13.9562	11.6816	16.8006	16.2709	63.6503	76.5456	107.869	60.0091	94.3344	84.1083
NM_001000374	15.6181	23.1312	15.3806	14.0444	21.809	19.0043	18.8945	19.4664	16.5041	18.6193	24.7279	73.5596	60.3773	52.2068	62.7908	59.8268	74.7099
NM_001000375	12.7112	15.3147	13.7504	14.9897	12.8478	16.9239	13.63	15.0652	14.3678	16.8702	18.3591	45.2316	56.8552	71.1249	60.4572	41.0326	54.7017
NM_001000376	16.1614	30.2207	19.2618	23.015	24.2295	24.6373	27.3452	22.0323	16.7279	30.6261	22.3863	81.4959	100.627	59.4621	61.7844	56.9878	159.927
NM_001000377	43.9554	109.8	65.9423	77.2598	67.559	71.861	74.1128	71.1113	61.0574	86.1664	114.006	155.798	302.014	134.779	182.952	129.057	232.472
NM_001000378	26.5301	42.2994	24.9088	35.9304	25.888	20.398	35.7356	36.7884	35.0144	38.2291	33.339	115.818	108.168	114.222	135.432	111.162	107.115
NM_001000379	22.8414	40.5437	23.4901	20.1172	24.1943	22.1897	17.8824	20.0002	16.6709	28.6953	28.5678	76.3408	116.886	80.1147	110.264	95.9757	120.574
NM_001000380	18.5384	29.7358	15.4417	14.5746	17.5835	14.4296	21.7342	20.1041	19.8724	22.3846	17.3264	128.646	75.9756	75.8134	66.9427	77.7699	84.6589
NM_001000381	19.3949	32.1143	23.678	23.3333	23.9859	25.7441	31.2651	27.1558	28.917	29.8563	21.9048	55.2965	102.573	69.0827	74.7387	69.5494	94.3368
NM_001000382	44.4147	82.3319	60.7117	78.5904	44.8833	35.2034	29.0617	45.6846	84.0544	58.8554	65.747	240.044	245.643	170.12	191.204	236.12	374.824
NM_001000383	16.9295	32.0541	20.5322	23.1224	25.0182	28.9408	21.1411	24.3183	21.1232	22.5567	29.7139	55.7511	64.901	69.5722	67.6791	58.597	108.89
NM_001000384	13.6526	21.0309	14.2071	12.1584	13.596	16.5317	12.7551	13.9222	12.6433	21.0274	17.1781	68.0943	68.135	111.314	77.4443	77.1293	77.8364
NM_001000385	10.7959	14.8367	10.8022	10.1235	12.8279	11.4712	15.2701	11.6984	11.696	14.5226	13.8086	52.8761	57.5857	62.0923	46.9396	63.9589	53.4652
NM_001000386	17.8185	18.3839	16.5601	14.577	22.1743	16.6195	21.7283	18.1311	16.538	22.0297	24.5909	53.7725	66.3845	43.5274	52.9102	61.0255	63.734
NM_001000387	24.1605	66.9294	24.2014	27.6218	27.2691	21.1881	29.9239	26.4352	22.1338	25.59	56.0914	68.867	144.153	69.8509	112.817	61.8852	155.47
NM_001000388	21.1508	56.5271	25.8593	33.0819	20.9641	26.3129	25.1577	29.4336	26.4997	32.7467	34.4369	92.7693	73.5164	125.818	80.8935	74.9225	71.1359
NM_001000389	15.4898	16.9367	19.504	22.117	16.1251	17.207	18.1906	14.9879	13.5575	17.326	18.0435	158.431	102.832	134.578	191.725	127.402	164.966
NM_001000390	21.3536	57.5231	34.3406	26.0652	35.7035	23.541	33.1608	23.4737	25.089	41.3374	38.4161	91.6591	200.888	106.554	94.4641	109.329	158.204
NM_001000391	31.1369	139.297	59.8987	59.7301	55.5361	67.1415	50.7172	49.1836	39.4197	67.5187	72.3076	117.593	172.015	157.542	97.658	88.9291	150.048
NM_001000392	22.6207	22.4588	25.8281	27.4746	28.8321	29.8612	22.8748	37.6818	24.2105	38.5369	30.5567	88.8257	110.522	77.0488	92.6925	70.0562	98.9782
NM_001000393	43.9472	165.806	84.13	68.5648	62.2143	56.8755	68.1231	42.9557	44.2915	80.2187	60.2305	93.5668	174.397	109.789	67.2764	123.371	178.098
NM_001000394	22.6234	44.9329	27.1301	28.6639	32.891	33.0539	25.0563	35.1767	31.9642	38.8479	40.8145	86.3692	113.471	106.494	75.0046	79.5737	123.532
NM_001000395	14.11	21.6399	15.4264	18.6828	17.5143	16.4361	17.0072	19.3944	15.5778	23.0813	15.7313	60.9281	104.597	122.75	61.2373	52.6363	89.8888
NM_001000397	16.5723	27.3923	21.3	16.5797	19.8965	20.1104	23.5575	14.3369	18.5685	23.7804	17.6967	119.235	105.038	108.904	127.174	91.4755	136.463
NM_001000398	15.3394	26.1944	17.827	17.9152	16.1084	13.2385	18.8296	20.463	15.1778	22.7305	16.6674	91.0335	80.556	73.1917	63.2355	68.65	75.1399
NM_001000399	12.1148	17.7789	12.5157	11.4765	14.7087	12.5217	14.5771	12.0678	11.2373	15.6842	15.1967	50.4547	60.4081	66.8899	51.576	59.2143	65.5025
NM_001000400	19.0025	27.4786	18.8631	27.2662	24.2805	21.2201	24.4338	26.4387	33.466	33.9483	29.2742	87.0122	87.6436	77.8944	81.4919	99.6124	86.9627
NM_001000401	37.4277	109.022	37.156	49.3296	39.2751	34.987	39.3122	39.8379	36.1528	41.0857	65.1309	158.298	110.147	123.912	96.9983	112.813	161.804
NM_001000402	27.8017	76.2061	27.9862	30.328	38.7666	25.2431	26.4003	20.9116	22.5647	29.5756	45.0121	172.651	99.0019	72.2269	95.1375	72.778	188.549
NM_001000403	17.1295	22.1848	14.5683	15.6944	13.9545	14.6234	16.606	17.5808	14.6677	12.7058	17.735	83.3935	93.0108	105.794	154.435	68.6937	138.516
NM_001000404	42.0321	69.3822	35.6152	26.5841	42.3537	28.2171	29.0305	24.2187	23.5702	25.9125	42.8704	61.3342	96.0439	61.4729	80.2666	75.1461	105.196
NM_001000405	27.6482	99.5035	54.8493	41.306	47.8513	32.0695	34.7113	21.7041	29.2273	54.969	51.9506	63.5238	112.709	88.8506	120.148	105.888	188.566
NM_001000406	19.8716	45.4859	41.1126	26.1557	14.0665	11.3345	14.0346	27.1008	29.885	36.5853	22.8879	130.363	184.874	162.41	152.96	167.101	142.886
NM_001000407	23.4859	24.9655	26.3629	20.0373	27.1652	21.4924	22.3973	17.2774	27.5346	24.2294	17.9544	73.3193	137.67	73.4533	87.8901	86.8515	100.606
NM_001000408	30.6236	43.3795	24.4484	27.849	28.1388	26.9894	35.7666	26.2445	27.2846	29.739	21.8423	82.6436	73.0759	96.0454	83.7914	109.195	95.5749
NM_001000409	24.6819	35.7438	25.2656	25.5356	29.7624	28.1264	28.3098	28.9719	20.8931	22.3209	20.904	390.14	192.056	216.442	154.118	397.314	268.169
NM_001000410	340.295	1830.22	695.559	606.54	421.997	332.697	390.44	386.006	356.709	763.861	514.732	905.052	1926.1	1111.37	601.819	943.137	2257.6
NM_001000411	37.2606	182.326	86.4582	76.0606	57.2005	53.1247	49.5195	56.8919	54.779	75.6567	66.2402	149.883	354.822	371.592	147.327	164.798	473.748
NM_001000412	59.7698	340.636	128.869	119.155	83.5502	83.5352	83.3074	70.7661	72.5906	118.764	91.2457	151.357	475.101	330.238	228.001	231.613	475.006
NM_001000413	117.7	681.385	257.848	216.927	230.622	212.306	184.205	203.191	175.335	402.433	280.962	519.433	877.967	407.949	257.11	441.877	1112.91
NM_001000414	252.776	302.969	238.719	242.007	215.409	242.806	301.063	171.881	174.524	145.632	81.1171	649.395	898.15	521.357	708.559	630.705	723.567
NM_001000415	30.5277	61.6852	46.7528	36.8245	57.0496	52.0517	52.5649	48.8033	41.0084	55.6407	27.0116	124.684	141.066	134.318	95.2887	104.729	113.796
NM_001000416	152.781	386.514	216.481	208.042	153.313	198.075	137.642	167.126	136.593	249.455	249.469	495.429	852.223	489.742	648.854	480.005	617.584
NM_001000418	14.7066	36.8137	21.7357	16.124	16.8008	16.2262	20.4555	13.0231	12.2614	16.2237	12.8284	90.0169	79.1839	73.3787	65.6559	67.2506	92.4018
NM_001000419	11.665	20.0357	13.2925	12.9997	21.0319	17.0368	18.8135	15.7756	13.3272	15.7944	13.2921	56.8077	77.8816	57.2841	65.8194	45.1091	68.8216
NM_001000420	35.659	147.078	91.5643	82.4244	56.0371	40.525	52.0028	57.9727	53.0691	99.047	83.0619	107.486	250.647	164.306	94.7321	107.511	239.504
NM_001000421	19.803	25.9343	25.492	27.0101	22.1427	21.63	22.7455	25.8891	27.9629	24.561	28.4397	101.72	74.3108	127.334	302.787	69.2898	72.7366
NM_001000423	21.1004	23.2909	16.9161	16.6563	17.8149	15.7364	12.8421	15.1771	18.6176	25.3526	21.7741	65.1234	89.4685	78.2486	88.7173	73.6117	84.862
NM_001000424	15.0419	57.9049	30.3123	20.7779	17.273	21.6351	28.4176	19.7649	18.6115	37.3787	43.3801	130.309	112.118	81.0184	75.7879	109.694	210.882
NM_001000425	28.0562	35.3462	27.9738	28.6408	37.3353	23.3925	24.9709	25.5498	22.0946	28.9483	17.8643	119.196	139.033	75.4271	117.226	106.727	117.724
NM_001000426	10.8671	14.8491	13.3053	10.3106	11.7055	13.4211	11.359	12.9965	12.2694	13.9395	12.8893	63.9793	70.2838	51.1199	63.0838	52.5406	65.1745
NM_001000427	14.6196	18.2094	15.9109	16.3519	14.5076	12.5401	14.9246	18.786	15.4785	14.891	21.8831	53.6588	67.3225	55.062	50.8836	42.4104	53.5759
NM_001000428	13.8861	18.8662	15.3348	14.5381	13.4777	13.4563	13.4415	12.9089	13.8727	12.6945	17.3766	134.77	57.543	125.632	106.945	119.131	91.3487
NM_001000429	35.7016	84.9745	39.4467	47.1363	50.9171	33.8013	35.0607	33.6715	35.8529	50.7329	50.8248	88.4153	125.768	130.258	112.656	101.755	129.737
NM_001000431	12.7138	15.8193	17.7583	17.1109	16.7963	19.5384	15.7051	12.402	14.3007	18.0228	12.1544	56.0282	61.0852	50.4913	80.2629	59.1019	67.7907
NM_001000432	12.433	19.5412	12.8247	16.2265	17.6726	17.5759	14.8295	15.5301	17.948	17.3749	13.7825	97.806	86.4644	109.712	102.129	81.3943	96.3173
NM_001000433	42.6077	43.2109	31.9902	46.7044	28.3342	27.7456	28.9067	38.9998	35.0993	42.5467	36.3496	88.9999	202.054	88.3865	73.1471	89.4105	119.159
NM_001000434	14.3355	19.5333	14.0758	18.4825	14.2803	15.7219	16.6561	19.4492	16.7546	17.4717	16.0041	62.2525	80.2058	53.1741	71.2187	63.5422	52.8858
NM_001000435	47.2474	169.716	68.665	70.9463	80.0012	73.0462	63.7503	48.3269	52.3821	123.028	64.8089	168.975	191.804	154.493	175.512	100.487	198.713
NM_001000436	22.7581	116.006	42.9419	36.7934	41.0257	30.0862	26.5317	26.2789	20.5801	75.7758	37.693	91.7719	166.704	119.59	73.6509	106.753	161.965
NM_001000437	23.4535	30.614	35.8838	27.5421	30.1852	22.7603	29.1071	28.2226	26.0612	36.5323	25.309	80.5009	154.222	68.1935	80.7073	94.527	73.4719
NM_001000438	158.224	317.031	286.531	257.876	238.658	320.628	310.832	185.33	167.332	139.938	87.0627	319.351	498.096	408.554	320.246	320.611	479.886
NM_001000439	13.3864	19.9988	13.1365	13.1376	11.5918	12.2923	14.6696	13.2521	13.2201	11.4264	12.9939	53.6433	67.6686	68.2707	67.2358	45.4531	78.2048
NM_001000440	29.5184	79.9399	54.5152	36.2524	46.0114	38.5654	41.4805	31.8216	29.8884	62.6259	52.7764	78.1763	77.1556	121.93	59.9051	60.4667	91.6831
NM_001000441	19.3624	18.5849	15.6063	15.7766	19.7879	18.183	20.5537	20.2206	19.1254	20.0652	17.3098	85.2236	73.3701	72.051	64.901	104.273	85.5011
NM_001000442	48.5174	99.3374	38.346	65.2609	50.092	56.545	51.4447	59.2256	53.277	63.3868	70.1226	134.582	232.078	120.523	117.973	124.182	211.277
NM_001000443	35.4888	50.6156	38.9864	41.9093	34.8706	36.4571	37.8137	37.2528	32.3735	38.9319	50.7699	83.9519	137.218	113.815	150.711	92.5476	131.63
NM_001000444	37.9321	85.1377	48.1824	45.221	62.1559	53.8141	67.9984	42.2433	35.3589	53.1636	63.9246	132.786	157.858	137.597	169.469	114.488	201.421
NM_001000445	37.1645	48.7221	31.8905	28.7017	41.8513	37.2452	33.859	45.9704	33.5069	37.5701	35.2371	149.24	119.713	245.883	114.893	186.951	95.2693
NM_001000446	38.0648	61.7437	51.0683	50.1812	67.4853	33.7999	58.5218	41.7591	42.0849	39.4633	31.5857	297.577	308.087	191.517	264.156	265.004	349.907
NM_001000447	20.6019	62.6704	31.1662	28.1859	25.1839	18.3093	18.5726	24.1266	19.7518	35.4739	26.6457	94.2751	83.3445	100.021	50.9706	119.785	120.968
NM_001000448	22.0022	20.0149	14.4731	19.6337	20.8376	15.1288	18.0367	14.5054	14.5925	17.0627	15.6506	64.9068	71.801	80.2513	72.0862	68.2359	71.2688
NM_001000449	21.3045	39.608	23.0537	24.5347	20.9582	31.1311	25.8034	21.81	19.9073	27.3214	21.7854	133.147	136.719	116.953	131.171	109.802	147.99
NM_001000450	12.2154	15.546	14.6102	12.858	13.9899	15.5826	11.8354	13.7951	11.3937	13.8329	14.9363	68.2811	62.2978	84.7537	58.1441	58.0333	67.619
NM_001000451	27.8604	69.8393	35.2972	41.5745	38.824	38.1529	33.4875	25.2838	28.041	42.8313	40.7337	69.1579	109.927	66.821	68.1185	52.8794	139.609
NM_001000452	31.6642	100.507	63.4629	51.3847	35.0255	28.8351	28.8474	40.5178	27.7835	65.3885	65.9284	155.185	187.579	100.714	92.5328	90.2133	231.318
NM_001000453	14.6888	14.5441	13.0083	14.6269	15.1364	15.9999	15.4402	14.6388	13.2228	17.6568	18.8518	52.5024	61.9972	65.9762	70.7791	73.1293	56.0249
NM_001000454	21.1847	34.9113	21.5388	24.3668	22.2258	25.9411	20.9353	19.0846	20.9611	33.9909	26.8315	76.7023	124.958	242.493	142.075	183.546	91.4713
NM_001000455	14.2042	18.5454	17.0994	18.8089	16.348	19.4048	25.4674	21.261	16.3271	24.0168	23.0982	55.3284	88.6036	56.9948	81.0076	61.1511	71.9959
NM_001000456	11.2295	18.9632	18.0904	16.771	15.2774	17.7593	13.5947	15.5283	13.5594	17.2086	17.8799	74.572	62.5021	69.4258	76.6665	70.1607	59.9766
NM_001000457	18.5944	27.037	19.234	20.5737	13.9358	11.6409	15.8682	19.4609	13.8311	23.4934	27.1068	46.6637	52.3154	59.0006	44.2056	48.1803	48.372
NM_001000458	20.1242	38.8495	24.3412	18.3833	26.1213	21.9597	25.7997	18.5215	16.1519	27.8087	33.9244	64.7143	58.2079	79.3433	128.197	44.9225	68.6272
NM_001000459	20.8794	22.0795	21.873	25.8321	23.988	21.1749	25.1668	21.1799	19.9509	22.3872	29.1501	70.5234	88.0954	64.9908	100.853	70.3403	72.8996
NM_001000460	30.3819	54.7746	41.3038	56.1957	22.6353	19.4597	26.211	27.2358	29.6673	38.378	23.852	143.123	151.537	121.434	121.596	90.8737	180.124
NM_001000461	25.7735	61.9988	36.2306	46.2793	31.4777	37.8641	32.2902	28.7486	42.3032	57.4716	44.8716	167.786	157.709	152.699	158.147	275.304	329.691
NM_001000462	17.2382	32.3548	23.7408	28.5849	17.6925	18.5213	23.041	32.0724	24.0962	21.823	38.5958	212.354	115.071	89.5335	120.401	118.508	210.021
NM_001000463	150.212	272.704	199.17	231.461	207.132	279.493	241.583	322.479	301.849	350.233	226.488	540.797	577.687	491.383	698.577	440.394	761.262
NM_001000464	23.9104	35.1884	19.7658	23.46	29.6632	20.8035	22.179	18.573	19.3461	26.0051	24.1194	66.2101	73.2307	104.986	92.6223	80.5097	73.2654
NM_001000465	18.3755	52.4026	25.7173	28.9042	29.421	27.9475	31.4506	31.498	29.1409	44.7045	34.3659	108.774	120.192	99.1302	116.715	84.757	110.966
NM_001000466	1082.18	1839.39	1290.2	1331.35	1351.33	787.336	959.691	1480.76	1316.77	927.6	661.93	2022.07	2823.58	2252.13	2206.48	1591.54	2593.74
NM_001000467	28.4485	54.8372	37.383	28.4186	26.8354	21.2822	28.607	25.0548	16.5339	34.4508	21.2797	112.312	155.34	109.829	159.354	111.138	181.436
NM_001000468	15.409	15.0807	13.6405	9.7736	12.7901	17.0595	20.0853	21.5252	30.289	28.7217	15.1507	94.1872	109.359	149.962	96.5093	112.593	115.23
NM_001000469	15.3221	19.308	18.2654	13.4811	16.2763	14.1729	18.4369	23.4313	19.6152	22.2182	24.955	85.7055	99.3469	79.5994	62.0041	65.878	80.2095
NM_001000470	26.081	34.1204	27.866	37.0325	23.7045	27.8198	26.867	23.3324	31.2216	24.3107	33.3921	98.3828	133.344	92.4944	102.458	85.1192	155.01
NM_001000471	66.4802	99.0677	121.943	100.914	81.1389	109.146	100.349	75.4066	68.197	95.9955	57.0797	200.094	271.117	251.455	233.352	288.589	359.674
NM_001000472	17.8505	18.6843	18.3524	13.1963	11.0049	14.2087	16.7271	18.8442	14.555	18.5624	16.8996	68.3818	98.962	66.912	60.1337	50.1532	92.0133
NM_001000473	44.256	187.236	101.846	65.5902	87.9615	104.313	87.926	70.4224	75.2912	141.283	107.443	143.006	208.601	139.155	133.988	112.07	247.734
NM_001000474	34.782	63.822	43.1104	42.6647	29.5881	35.3654	36.7576	25.8574	28.4608	41.6885	38.5778	110.366	144.575	87.6751	145.202	128.621	120.783
NM_001000475	28.0332	45.2421	42.6423	35.7086	39.6489	38.8912	38.0193	21.4292	20.1577	40.9021	45.6138	104.771	123.779	111.665	64.4399	75.0711	150.696
NM_001000476	101.546	91.8878	110.629	105.091	138.02	146.668	136.179	109.365	102.615	123.171	64.4026	345.607	254.012	337.829	414.348	344.236	413.856
NM_001000477	17.1996	24.138	13.4243	13.3689	25.1734	27.0071	31.2781	17.8149	13.738	19.0695	19.3175	54.8472	143.837	88.9359	79.1784	148.834	94.0611
NM_001000478	33.9363	41.6414	26.9542	35.1736	58.6214	31.8642	33.9185	38.0587	37.9569	48.0434	32.3289	141.781	142.45	156.416	139.192	100.323	150.86
NM_001000479	26.9233	37.3525	42.4525	32.9212	44.9642	53.4277	53.239	50.1048	45.6082	38.1665	32.668	152.995	280.778	276.835	180.736	155.131	222.189
NM_001000480	127.567	276.06	218.532	178.594	176.587	175.805	177.356	129.226	169.48	147.454	102.518	417.087	773.864	502.849	528.549	387.943	604.509
NM_001000481	13.8421	19.0446	15.6739	10.7171	19.1772	18.7562	18.1083	14.5635	20.1372	13.8953	13.3593	55.6135	75.9057	41.0239	65.8968	81.4493	73.6513
NM_001000482	26.8354	42.1984	42.231	38.2525	29.4155	17.7646	31.6462	34.4082	31.6462	39.8234	35.1301	125.869	211.032	212.148	159.432	153.263	211.763
NM_001000483	17.0133	19.2216	20.6373	11.7028	17.8207	20.7636	21.9834	17.4452	15.7139	24.6896	18.2977	120.126	101.04	92.4118	64.8273	95.6575	118.544
NM_001000484	48.3689	82.7197	74.4091	62.7008	85.9878	72.5031	84.2529	71.434	66.6438	64.9284	39.3625	227.412	219.517	191.712	185.088	239.789	307.76
NM_001000485	57.7106	72.4104	68.4309	48.8909	50.4737	57.6907	42.8135	57.0527	69.3936	66.5008	68.3809	123.686	170.515	133.09	188.992	119.429	223.686
NM_001000486	100.922	551.306	256.508	351.377	194.204	172.639	191.309	167.778	212.121	356.735	269.217	524.825	632.79	552.817	489.892	444.908	1019.91
NM_001000487	451.641	517.413	588.145	589.688	457.869	540.998	464.336	743.288	743.779	692.618	539.037	1417.66	1316.72	1558.46	1795.34	1412.29	2006.62
NM_001000488	16.3143	20.9051	17.7695	15.2734	24.3752	18.2469	30.8969	18.2993	14.0747	19.5338	16.3832	80.5426	60.1067	83.2415	123.713	81.0532	75.9265
NM_001000489	32.4401	77.6277	53.1519	29.5751	32.514	18.7803	48.334	48.3288	46.2085	49.0088	42.7342	169.867	181.97	74.8116	94.8984	109.162	94.8693
NM_001000490	20.3041	61.5535	29.725	20.5116	20.8046	19.1958	21.3448	19.9988	13.3971	19.5019	18.9725	82.587	122.697	144.423	72.1108	122.229	83.6047
NM_001000491	26.6079	46.4777	27.5969	16.3148	17.0813	19.0049	25.8565	22.6643	17.1491	21.02	18.469	69.2026	83.1085	67.9473	68.3342	68.0289	79.4616
NM_001000492	17.7576	44.1258	23.4662	14.0644	13.9104	12.9622	18.5215	19.0407	12.1555	14.5486	13.8933	73.6077	86.4765	77.4879	64.4471	51.7946	76.5912
NM_001000493	50.2583	89.7487	49.4895	61.346	59.116	57.9142	66.3702	50.296	47.6434	54.4294	49.1393	183.387	241.608	182.769	196.917	213.798	332.27
NM_001000494	16.8117	40.7885	21.1646	28.2343	29.3746	23.1955	27.3386	23.1418	18.4651	23.9278	18.7363	110.491	211.471	142.894	106.41	173.416	190.778
NM_001000495	36.7696	62.9436	40.1415	41.4825	50.4636	41.9252	44.0125	34.9206	37.7541	66.0691	46.1907	70.8704	118.335	131.235	83.2641	71.4159	135.599
NM_001000496	31.7099	75.9045	39.9105	44.3685	35.8559	36.4569	32.5307	26.8711	28.125	44.7233	39.3772	66.2012	101.985	82.4483	123.958	65.6343	110.764
NM_001000497	24.8227	62.0275	38.6912	37.1845	35.3396	30.2727	33.2277	23.9313	30.497	35.5584	50.6628	77.8219	145.517	134.483	84.2541	85.8703	108.856
NM_001000498	13.2979	17.577	12.6132	11.4152	11.7452	10.6194	12.4534	11.0075	10.1617	11.2053	12.0921	83.6262	54.2862	62.3258	53.2128	61.6784	57.553
NM_001000499	23.3538	28.4405	26.1115	26.4188	26.3071	24.835	26.0837	22.4611	26.7612	34.3388	22.4184	105.082	65.0046	63.5975	76.1795	62.7222	100.486
NM_001000500	18.5894	30.9314	19.8852	18.198	18.6113	17.8415	21.7026	29.3059	21.5904	25.897	31.7013	77.4107	114.898	121.614	106.922	100.839	136.349
NM_001000501	43.4125	62.25	57.3254	53.4642	52.1811	56.623	59.949	43.58	39.1183	63.0168	50.8414	112.181	162.249	135.99	124.15	113.274	125.106
NM_001000502	27.3581	31.7277	29.7515	41.5944	25.9357	34.3508	29.7163	25.1631	29.8756	30.3581	30.8626	133.361	81.2141	105.584	124.167	118.449	119.871
NM_001000503	57.5985	65.9044	61.4803	79.4724	71.3563	56.8978	51.1516	56.4718	47.3705	56.7191	60.5496	96.0887	118.622	132.259	120.298	105.497	150.583
NM_001000504	30.6727	72.6968	47.0545	51.4121	48.2647	58.1214	52.2179	42.0593	46.5026	47.3492	35.1574	119.513	204.704	152.69	175.205	167.49	237.996
NM_001000505	12.8618	27.8855	20.3207	13.1921	20.109	17.9445	18.31	20.631	13.3207	17.7224	17.9973	72.4868	60.0151	67.6465	86.6463	73.9098	78.8639
NM_001000506	54.6479	73.0757	54.6274	66.5971	77.1467	55.5313	68.5405	54.1115	66.6275	67.2989	64.7002	192.796	309.073	301.562	219.942	194.469	196.374
NM_001000507	110	241.184	135.957	188.031	130.578	171.673	190.921	228.687	134.116	119.925	184.434	503.81	263.422	571.816	333.38	354.129	423.222
NM_001000508	34.5089	78.1053	46.7609	55.5631	44.7057	33.9907	39.9127	39.2968	28.8623	56.385	75.635	87.0767	126.978	167.412	114.385	158.598	161.661
NM_001000509	25.8848	34.8013	28.204	23.2826	46.0579	43.9876	52.7897	33.8634	38.1147	43.4657	24.972	104.185	153.456	208.566	106.944	167.181	202.65
NM_001000510	28.5905	94.8997	32.2141	41.1734	24.9499	26.9312	23.9649	17.6314	30.0304	26.4296	23.4763	68.6374	114.901	157.447	72.3088	85.6649	127.982
NM_001000511	24.8987	36.9381	27.487	33.7912	21.16	23.9434	33.7391	25.2643	29.2389	30.0268	37.7415	97.4886	69.1685	77.7995	57.0282	57.8661	88.6301
NM_001000512	12.9311	16.1811	13.6751	16.7984	16.893	15.0816	19.3781	12.5866	14.039	16.9081	14.6831	55.7224	64.1133	48.301	122.068	65.4487	65.2521
NM_001000513	23.3746	79.1983	34.8548	29.4	26.606	28.8051	20.5737	24.3059	21.9749	38.8719	41.1229	64.055	99.0582	76.9394	64.263	96.3905	123.87
NM_001000514	21.2284	49.5823	24.9364	26.9234	31.2512	22.7581	27.5229	21.0304	20.0618	29.061	32.1126	181.733	213.424	100.275	77.8418	88.3025	158.423
NM_001000515	32.3132	83.093	48.7877	49.9599	33.016	39.2849	32.5772	30.4569	32.6886	44.6755	37.0305	111.606	130.661	128.316	105.946	89.7686	191.235
NM_001000516	14.7689	32.0948	25.0402	26.374	24.8884	16.5372	22.1716	18.1739	16.0861	29.2892	37.0638	81.5382	182.452	96.6363	98.4181	65.5093	122.788
NM_001000517	13.1266	23.7382	22.6472	20.737	20.0788	15.9049	19.2091	19.3912	18.0871	14.2459	16.2984	92.6939	128.389	69.8354	133.776	71.1062	99.7702
NM_001000518	18.6557	37.9159	27.6498	19.7791	24.1815	20.9907	29.4901	22.4527	20.5916	42.1477	39.3555	61.5155	71.6598	54.2977	51.0452	66.5975	98.8031
NM_001000519	23.5465	20.5432	25.9478	18.44	20.2422	19.164	16.7115	24.2063	22.6117	24.8839	21.1429	92.786	163.103	69.3346	67.4962	56.9336	94.1774
NM_001000520	62.0791	69.4068	63.7753	55.6791	103.55	108.519	111.699	94.2321	101.81	87.0357	74.7328	200.551	152.729	167.814	130.785	124.084	236.356
NM_001000521	28.3289	70.2564	32.0952	31.7546	27.6188	25.6437	24.4246	31.281	22.2287	42.9095	39.3105	100.424	116.581	70.1981	76.3266	83.0266	127.07
NM_001000522	21.4003	18.299	15.6486	15.9962	18.4224	22.7015	17.3485	20.2042	23.2566	24.0018	25.7778	93.086	180.047	140.561	86.5814	96.5362	92.7106
NM_001000523	72.4425	287.408	106.709	126.237	66.4802	69.5551	77.883	63.2768	90.3599	119.314	84.4556	196.19	227.821	306.64	205.105	238.591	406.584
NM_001000524	54.8067	127.984	52.5341	63.4225	55.7343	56.2715	60.646	43.2659	39.0436	84.8748	73.1704	81.1186	110.505	149.381	73.7141	80.3478	128.073
NM_001000525	134.592	178.799	170.837	169.87	201.446	137.379	125.439	181.215	230.534	143.014	124.083	443.765	616.218	366.273	513.355	437.286	556.955
NM_001000526	24.2343	51.7354	33.8799	32.4708	27.483	32.8531	37.8582	34.6026	28.7896	43.49	34.2426	80.9757	114.23	85.8737	75.0421	80.8179	163.982
NM_001000527	246.918	845.439	408.063	370.131	350.869	338.746	331.484	311.214	282.726	459.929	411.67	822.441	1435.66	847.371	454.58	699.278	1821.55
NM_001000528	60.75	145.913	106.529	113.803	65.5289	56.2686	77.2324	76.2779	66.5825	88.0128	65.1863	260.892	171.211	129.221	126.854	120.176	211.561
NM_001000529	67.709	229.766	103.319	125.571	76.7806	74.6455	62.9652	86.1106	67.2687	39.8222	94.5784	211.284	245.429	254.236	222.448	201.575	416.659
NM_001000530	14.7863	25.6108	19.5237	19.0648	15.421	19.1228	14.4788	14.5456	23.1154	19.8743	23.0197	129.237	76.667	72.6537	88.0822	63.0393	76.2394
NM_001000531	17.9659	20.1447	17.4805	17.856	15.9593	19.4462	18.9842	18.1862	17.966	20.7906	26.2154	103.484	94.4842	97.9426	92.9736	68.0213	103.529
NM_001000532	27.4556	92.7515	36.2589	36.0721	55.7303	58.9486	58.4772	35.9605	41.1403	59.2038	50.0099	92.2796	149.654	101.466	69.416	94.8451	137.952
NM_001000533	21.812	33.6046	31.0142	27.607	24.6086	26.5679	21.6656	22.3355	19.97	37.5299	17.5707	89.5472	97.761	55.4926	53.793	71.7897	84.3798
NM_001000534	24.2399	44.7317	23.021	23.4245	27.0031	23.1199	26.5164	18.65	25.4081	35.8046	29.5762	62.2904	93.428	115.552	58.438	153.623	86.7762
NM_001000535	19.4351	52.8982	31.4182	29.9	24.1225	23.0958	28.3744	27.478	25.2357	40.5467	34.096	81.3307	98.6787	79.6795	63.5473	80.8766	114.982
NM_001000536	51.4811	209.766	78.7952	64.85	64.1956	58.1607	63.9608	31.5697	47.3393	124.063	124.311	182.677	276.507	191.38	145.539	180.95	308.257
NM_001000537	32.8094	129.394	67.5135	64.2563	64.377	60.1447	73.5707	39.9213	39.6886	88.9702	67.8959	116.113	168.995	173.667	90.1985	137.055	253.429
NM_001000538	42.889	108.309	66.8615	67.5731	43.3486	46.2974	45.2202	51.0891	49.5131	41.5745	45.1526	400.058	367.646	315.941	258.667	349.159	507.531
NM_001000539	25.1075	41.8476	28.2318	40.7717	23.5988	29.3772	23.2897	25.898	27.0882	24.7358	24.6005	143.795	156.974	88.9058	136.801	101.354	136.859
NM_001000540	12.0474	16.5672	15.2151	15.902	15.2292	15.1284	16.0385	13.8786	13.3006	14.089	16.6021	83.7126	67.5985	71.6671	66.1789	66.8586	79.8594
NM_001000541	30.1349	74.3605	49.8697	48.4539	39.4834	32.5214	37.5554	25.9073	23.7799	40.9131	36.5902	91.6309	137.433	125.327	92.4688	203.557	138.009
NM_001000542	21.2242	17.5617	22.8334	16.3183	21.1382	16.1495	13.8551	14.6009	24.0564	19.5145	26.8948	53.3994	99.2374	133.331	85.0761	140.645	76.0584
NM_001000543	19.3274	24.7411	17.1701	18.0089	15.4286	17.6249	17.6709	19.9656	13.8875	23.9329	27.4659	68.8226	64.8066	57.1178	80.9318	54.674	63.4709
NM_001000544	16.1487	33.6928	27.9939	20.0135	37.6685	28.0911	28.3194	26.3019	23.141	28.8889	39.831	127.982	184.88	166.33	97.9081	129.565	128.252
NM_001000545	14.0779	24.1474	18.7733	23.7671	22.7995	23.3572	22.4351	25.1036	19.1722	23.1736	17.2731	70.57	59.7246	75.4949	76.0648	76.2148	65.3832
NM_001000546	24.2042	48.4792	39.5627	31.0248	40.4635	34.8132	41.3543	23.7599	25.2835	43.8756	29.1134	78.8896	236.831	106.058	80.3685	103.537	99.9553
NM_001000547	55.104	128.278	72.8176	73.7917	72.6218	69.8387	66.3938	71.3546	53.9074	95.583	94.7218	130.557	230.666	163.473	170.076	121.546	190.306
NM_001000548	19.2264	27.9507	23.0504	22.3771	14.2457	14.4473	13.7135	14.6059	14.0397	22.4518	18.0474	59.5219	70.6103	54.8871	90.6401	61.0262	63.7125
NM_001000549	31.9543	36.423	27.9185	34.4365	27.2821	28.9767	35.8484	32.8339	23.6675	37.233	33.477	111.095	180.839	94.9831	65.5749	99.3216	212.345
NM_001000550	104.612	150.682	125.354	91.834	117.05	149.458	98.4905	111.325	89.0214	105.377	151.021	310.874	307.254	293.493	398.22	420.592	368.413
NM_001000551	15.5086	19.2415	17.4496	18.5332	19.7257	19.2532	17.3872	17.0074	17.8973	25.3952	19.7208	62.7887	105.718	83.882	92.9114	73.5637	94.6603
NM_001000552	53.8213	104.064	78.4168	88.5317	61.2546	62.0312	61.2413	48.8284	60.6584	63.3443	39.6095	209.425	397.479	316.636	287.003	246.383	388.587
NM_001000553	19.2281	55.5804	27.4328	28.4541	29.4625	24.2985	25.8826	26.1969	21.8342	34.4645	46.1666	60.3728	99.5794	196.685	58.5317	74.0134	109.186
NM_001000554	28.408	42.1668	34.2698	34.7105	47.551	60.474	58.258	40.3271	40.6677	29.4564	53.8114	117.186	123.59	158.565	105.516	111.342	95.0367
NM_001000555	8.8706	11.7041	9.9099	10.3135	12.0782	10.6632	10.0791	11.1856	9.9124	10.5978	10.8282	49.8628	42.9818	54.3166	62.2143	49.764	45.6033
NM_001000556	17.2395	32.6712	23.4112	24.3452	24.131	23.4598	20.7262	29.32	25.8499	35.0972	32.8376	67.8748	76.0173	70.1044	64.4269	78.0635	73.5877
NM_001000557	31.0152	51.8977	41.0261	37.0318	27.7404	32.1332	33.7149	34.246	33.1364	45.2001	46.4957	93.141	133.744	101.543	71.9582	95.3979	122.489
NM_001000558	97.5249	139.727	96.6232	123.647	112.044	112.37	120.211	85.1379	94.797	126.049	107.539	194.622	136.734	179.479	251.676	196.716	235.482
NM_001000559	27.322	99.4998	52.3561	50.9006	40.413	32.2283	31.633	31.4353	30.4761	49.6528	40.1488	81.5546	121.34	119.322	102.92	132.773	132.849
NM_001000560	19.662	28.3092	21.2867	24.7751	22.228	19.3378	22.6054	20.4935	21.3514	28.1772	18.2988	169.841	156.836	171.917	214.639	145.2	208.71
NM_001000561	34.5056	67.7623	41.2778	43.8391	33.5964	31.9652	37.6188	56.3645	44.0812	64.2445	64.7994	149.058	216.408	199.607	137.199	226.906	275.603
NM_001000562	22.0474	38.6867	27.3739	39.2604	31.1396	21.9689	33.2819	23.4614	32.9828	35.2779	39.1162	142.535	181.823	122.47	157.119	133.142	122.789
NM_001000563	12.3087	12.634	12.8148	12.5113	12.6696	13.9658	15.1919	14.1691	12.1398	12.1023	13.6915	46.8453	64.4118	103.215	71.0618	80.6743	54.5951
NM_001000564	18.581	18.29	14.6203	13.2623	13.3732	12.5578	18.002	18.6663	15.5971	16.3854	15.7968	118.629	94.9488	88.7441	103.632	83.0852	83.9852
NM_001000565	41.7055	50.5833	69.8064	52.6627	91.0692	68.7933	73.0224	73.9924	48.3342	74.5097	64.8411	100.63	177.735	199.993	130.599	105.184	166.245
NM_001000566	20.5757	60.0251	37.392	30.4706	25.5156	21.9747	22.4569	22.6895	19.894	32.8542	37.5402	65.7955	79.7681	60.9994	110.874	54.4392	98.0223
NM_001000567	25.5013	63.3611	36.0479	35.2707	22.1654	21.4399	21.5716	17.4562	26.4563	33.2965	37.5336	75.7577	151.987	67.8643	82.9425	78.3884	104.9
NM_001000568	16.2369	15.7219	14.533	15.6435	18.2404	16.3668	16.6908	15.9267	17.2381	15.915	17.5704	151.941	62.7417	92.7289	108.126	57.6907	63.6745
NM_001000569	20.2254	42.4218	32.7422	32.8089	49.0267	39.9468	55.8143	22.5437	23.1667	28.8197	22.9801	139.442	166.647	177.833	141.675	115.438	177.655
NM_001000570	22.5475	25.4343	27.2399	23.9436	33.1432	27.8511	29.535	24.8461	24.5511	30.8583	40.9043	104.197	169.265	107.068	108.191	99.5594	146.84
NM_001000571	23.1906	17.8288	22.1314	15.8566	15.7547	16.8202	12.6293	15.5387	15.6088	20.5303	19.7737	170.029	100.39	309.904	92.5623	90.7992	136.185
NM_001000572	11.4943	15.2213	15.4519	14.6909	12.6632	12.7622	14.1127	13.5862	10.9103	12.0541	14.0919	86.7088	43.4322	65.7512	50.3734	43.8448	55.3812
NM_001000573	25.9242	44.6436	29.7721	26.9914	25.9837	16.9814	28.8274	26.0578	19.9864	27.42	31.06	123.208	125.901	128.964	120.999	185.361	219.346
NM_001000574	15.8343	28.3473	20.12	22.2356	26.733	28.8963	31.2469	32.9659	16.9879	26.4186	21.565	79.9873	89.869	113.296	122.967	55.9049	112.251
NM_001000575	26.8932	33.5815	26.5928	22.2327	30.4981	19.6414	22.5976	23.8419	19.8241	26.9286	23.0374	79.693	66.2763	65.4329	68.5193	59.9429	116.963
NM_001000576	44.3086	201.884	79.0408	84.4176	86.8614	69.1709	79.9652	72.234	58.8631	95.2135	101.342	144.448	191.801	146.307	128.241	128.719	210.239
NM_001000577	46.2138	142.876	59.101	66.7245	60.991	49.7346	60.0494	66.3049	64.6979	89.4417	55.4097	214.437	334.122	235.006	160.688	223.625	371.714
NM_001000578	24.4544	42.481	28.2855	35.6308	32.7304	33.1738	37.3818	30.7865	40.1093	52.508	40.5399	130.544	127.982	111.443	129.443	122.853	138.95
NM_001000579	24.0961	55.8389	38.7182	39.8951	26.3246	25.2262	30.4356	35.6902	34.8458	49.314	61.2588	71.4477	91.986	73.7852	75.2381	57.1298	175.884
NM_001000580	50.1993	134.381	86.3741	88.3159	63.9872	54.514	96.783	53.6761	87.2092	81.6025	60.6385	149.157	249.09	150.354	117.554	139.338	245.336
NM_001000581	35.4585	78.3953	50.2066	40.8051	44.0734	43.0864	28.6123	27.6344	43.2641	44.3715	48.658	155.32	142.368	110.46	99.3897	92.5615	179.57
NM_001000582	31.4363	20.8194	33.0539	23.6421	28.8902	17.5753	21.1976	28.6117	16.98	23.4009	18.4297	108.968	120.951	87.8226	130.535	86.3698	90.0536
NM_001000583	36.6351	77.9782	51.7268	40.2552	49.6129	51.4122	44.0197	56.8737	41.9227	76.4227	72.6378	297.012	316.676	333.497	365.57	186.336	231.392
NM_001000584	56.7309	89.9299	71.258	62.7344	132.903	113.176	107.413	69.113	77.581	85.7014	60.0419	191.592	309.776	234.446	232.752	200.311	256.849
NM_001000585	16.7115	33.3433	25.937	26.673	28.2473	24.1255	29.8581	25.3409	25.922	32.7365	20.2701	65.8824	102.274	97.3536	116.561	69.062	118.797
NM_001000586	12.6489	25.2574	14.8693	16.4333	15.5058	15.4968	21.4734	13.8359	12.6365	19.1172	21.2337	87.4265	90.5615	97.6023	75.3493	85.0507	101.01
NM_001000587	24.7818	49.9886	28.3621	35.7165	24.1608	22.1222	19.6233	24.7379	28.6647	57.726	55.2049	147.628	101.117	141.072	139.74	88.5487	152.665
NM_001000588	39.2165	87.5774	59.2468	58.6574	37.3493	38.0702	41.5084	38.7661	48.6479	74.3314	45.7715	210.125	248.757	188.029	187.236	263.536	400.115
NM_001000590	49.217	110.37	69.9989	54.9835	61.2273	54.7871	59.9381	62.4782	57.0551	98.4001	78.3467	178.652	225.962	230.904	165.027	128.152	317.882
NM_001000591	46.4633	148.409	75.6755	56.7873	58.9956	59.6293	61.9684	49.1577	43.5565	73.1049	67.8627	121.763	276.057	155.675	135.44	157.942	142.805
NM_001000592	33.3868	99.9063	54.9148	57.4303	33.3866	37.7773	39.7284	40.9183	33.6104	56.8826	38.2265	123.489	182.453	101.778	103.84	81.5392	116.718
NM_001000593	24.1508	34.7583	32.6509	26.5509	55.7623	39.186	52.3962	57.2947	49.4799	85.2531	88.5	217.15	225.381	227.632	112.19	179.914	329.463
NM_001000594	69.9461	126.406	92.8148	146.085	92.1112	83.8894	113.397	88.191	70.856	96.0053	73.4485	177.844	298.029	201.531	212.095	185.244	364.52
NM_001000595	91.5985	144.88	104.581	94.4869	74.6717	55.3382	76.0239	54.2815	48.5563	80.3568	74.8845	187.948	210.679	149.309	157.856	136.786	315.347
NM_001000596	41.4569	79.2609	53.1044	52.3212	30.3389	30.164	26.5323	60.6322	28.3923	55.3438	46.2798	119.828	147.913	138.924	135.828	151.789	348.188
NM_001000597	18.9674	25.3041	19.2453	16.5182	18.2336	17.0107	22.2286	18.5834	14.561	18.8637	22.4778	53.6629	102.856	88.2925	66.9186	65.3813	68.1292
NM_001000598	58.7676	103.267	77.0371	71.8795	69.879	75.6676	76.28	72.526	64.2841	81.4997	64.5605	276.762	398.42	167.639	170.977	176.715	397.351
NM_001000599	21.4016	59.5219	35.4074	34.9042	25.8595	26.6743	31.555	42.7295	24.9946	46.3606	60.9304	116.265	178.277	76.7979	75.2017	102.348	193.434
NM_001000600	16.0667	47.8722	35.0995	28.6549	22.6492	22.4612	14.7468	27.2404	20.1349	21.4993	29.9389	73.5711	72.1363	63.7502	69.1131	135.606	74.2172
NM_001000601	34.3433	59.6482	47.103	41.9306	56.7877	65.8216	80.4167	51.0242	42.3306	40.9468	37.1467	176.958	217.25	168.651	155.114	146.773	221.008
NM_001000602	14.9827	19.6712	18.2588	16.6542	18.3955	16.057	16.6876	14.0555	13.7577	15.3882	14.1337	45.4649	72.85	66.4796	50.2738	56.9699	55.7694
NM_001000603	16.1195	23.8591	17.4696	16.485	19.6309	23.6949	19.4985	19.3684	16.8734	19.2469	19.6921	57.8922	60.7945	107.975	61.0105	56.7045	62.2479
NM_001000604	21.7655	33.0672	28.0604	37.2987	31.5358	27.7964	35.1395	30.1469	25.2886	39.8927	46.7636	149.082	140.739	102.125	104.856	180.567	150.743
NM_001000605	15.7771	27.1762	16.1344	18.5191	23.1458	14.0409	27.2388	17.34	18.0611	25.8316	25.1686	76.7991	89.5863	92.7432	83.1686	93.1124	81.8003
NM_001000606	105.153	419.698	185.792	184.472	155.775	139.437	110.97	102.689	85.0644	184.446	184.122	227.166	430.601	224.82	130.847	130.058	534.65
NM_001000607	18.4229	53.7366	29.8761	30.4207	21.6135	19.7935	21.9349	23.2879	25.1054	31.6235	28.4433	104.201	88.6624	87.6087	69.656	113.666	130.563
NM_001000608	30.6918	67.9052	42.4262	33.5517	54.5109	51.8628	49.8906	40.5565	33.8407	58.6055	55.4686	77.7369	128.243	89.0174	97.6633	98.6924	156.904
NM_001000609	12.285	12.1234	11.6703	12.4249	13.357	15.1208	15.5835	12.8815	18.39	16.7879	12.6979	56.9944	54.7512	82.061	69.9199	68.452	57.1676
NM_001000610	17.4806	24.7387	20.8164	14.8371	19.2065	17.8133	18.3106	18.1591	19.0179	26.0085	22.1821	68.087	93.8817	65.6976	68.0286	84.2595	64.6517
NM_001000611	24.4215	32.6898	22.5017	23.4244	21.8184	25.5683	23.1458	27.5887	20.0403	28.6711	38.4525	95.1652	183.163	145.225	92.6381	143.134	114.302
NM_001000613	13.6635	21.3542	22.1972	18.9358	22.3581	21.78	18.6486	16.0846	14.602	20.6366	17.1854	49.1334	89.1582	75.6003	66.5284	57.5913	87.0141
NM_001000614	11.9824	16.0636	15.2793	13.812	11.7095	14.6602	13.9122	12.0449	11.6396	15.2861	12.4423	49.3627	56.0465	65.3466	62.9867	56.0223	76.3334
NM_001000615	45.2532	83.286	71.6563	54.344	46.5754	42.2139	33.3201	42.4904	27.6411	64.813	43.4583	96.9394	102.27	245.26	116.557	143.018	217.027
NM_001000616	14.9004	28.5208	16.9432	15.9895	24.8496	17.3887	19.1906	15.2592	16.7283	26.3282	30.1345	55.2217	62.858	92.4944	49.0582	61.8125	96.3366
NM_001000617	56.229	153.779	76.2821	79.3751	63.7272	48.1387	59.72	45.8712	47.6435	50.5434	60.4378	161.891	178.373	163.081	153.354	135.875	233.614
NM_001000618	71.8395	154.883	88.1902	87.5078	70.1627	66.7234	52.5301	61.5521	50.282	79.5245	84.3992	270.784	276.964	246.763	196.661	244.356	273.344
NM_001000619	34.5234	50.0799	52.6781	60.8927	54.89	48.3745	40.4396	33.9823	37.3319	40.2276	48.298	109.414	141.915	79.6223	78.3356	100.328	120.365
NM_001000620	13.7178	32.2998	17.7128	18.9234	17.2626	17.7615	17.6492	19.5661	15.2187	20.9085	19.4391	54.2002	77.6275	59.9371	67.6628	52.8412	79.2019
NM_001000621	34.783	70.1746	49.7968	47.709	42.5192	35.9135	41.4341	42.128	30.8715	44.8717	45.6048	107.191	122.618	84.7956	105.41	73.7673	116.851
NM_001000622	13.3272	22.3649	19.1215	15.2415	17.3476	13.9831	12.9987	13.2904	16.9924	19.8167	24.8595	61.4847	103.025	77.3504	69.8709	50.8476	51.8231
NM_001000623	19.0581	45.5251	29.0822	21.2411	41.7187	35.7717	36.2972	24.4824	20.6623	47.7291	27.9906	69.5377	106.53	88.8714	74.3707	78.6584	182.594
NM_001000624	18.6316	27.4245	21.8225	22.0486	26.7565	19.2007	24.7852	23.2789	20.6589	33.9963	31.258	217.674	69.9727	81.5712	167.095	73.1662	186.47
NM_001000625	16.342	31.6761	21.4503	26.9719	16.51	14.3248	17.5846	14.0344	17.1923	20.6726	31.4657	54.7953	86.3136	86.6553	66.5527	51.1149	49.2607
NM_001000626	21.5702	29.77	24.7887	21.4819	31.3373	31.1984	26.4924	25.9207	23.8036	31.935	23.6289	65.3943	94.2227	141.881	65.6441	112.657	100.216
NM_001000627	35.8553	51.9135	51.8336	52.1283	48.7814	51.9592	44.5482	42.5102	30.6926	40.212	49.9899	228.686	153.093	110.066	98.694	192.139	124.018
NM_001000628	25.119	39.7844	26.3575	26.4369	18.5938	21.8335	14.2165	13.0528	14.6587	16.1543	26.032	79.1868	105.757	64.7544	101.27	113.892	179.123
NM_001000629	66.2943	119.748	73.4935	80.7357	46.2136	54.1778	62.6839	60.7681	71.144	89.9573	91.0777	179.717	183.351	118.297	111.048	138.434	208.734
NM_001000630	18.4198	29.9403	23.2441	32.0217	22.4269	18.6545	23.1622	22.9754	32.9169	27.77	31.168	133.162	96.6035	98.6646	72.933	99.1919	105.563
NM_001000631	13.354	18.9237	13.8747	11.4212	13.559	15.0161	12.5901	14.2764	14.1468	13.6101	14.6725	61.4984	94.687	82.4492	74.4765	65.9899	77.6891
NM_001000632	29.3208	72.9928	41.8703	42.8842	38.3446	35.8104	39.0921	39.1573	30.3458	44.398	52.742	60.9973	72.0231	53.7531	100.629	55.6817	84.7105
NM_001000633	18.5678	21.0348	17.1055	20.271	17.1938	13.9865	15.0971	24.3181	20.8114	26.0457	22.1202	104.346	80.0051	102.383	80.7779	67.7372	96.465
NM_001000634	17.7242	25.8655	22.1465	28.3881	19.2493	22.9712	20.878	17.8985	26.0991	26.752	33.6072	122.613	127.371	96.9033	98.0222	114.399	83.5798
NM_001000635	15.3483	15.2277	16.3523	16.2225	17.7946	16.76	16.2886	16.7866	18.3198	15.3379	16.4497	59.0585	53.9742	57.2163	115.59	54.2341	71.6194
NM_001000636	13.7298	25.4894	15.8896	17.709	15.0901	15.6106	15.2185	15.3597	12.9839	17.0006	20.8838	75.7494	75.0058	67.5296	67.3378	82.4285	94.5389
NM_001000637	98.7298	152.463	106.906	132.299	107.596	99.5292	70.7108	63.3642	68.4131	92.1652	55.6033	110.963	188.799	169.001	192.041	125.228	250.205
NM_001000638	152.215	379.173	252.732	234.555	196.802	223.699	178.041	173.402	132.804	217.082	182.032	466.577	950.054	411.252	452.353	396.789	820.464
NM_001000639	24.3052	38.7115	31.4669	35.2588	31.1983	37.1502	17.2608	37.6499	29.0024	28.6129	28.3771	134.402	117.934	114.976	88.3926	107.301	126.916
NM_001000640	11.5207	18.8192	11.0065	11.4926	15.9885	16.3251	14.7126	13.3793	10.9844	17.1023	16.3453	47.9783	63.4837	80.2183	68.9297	48.8783	60.568
NM_001000641	13.7572	23.3384	18.8726	15.7484	15.6095	13.9578	13.8433	14.3872	19.779	18.1279	19.1676	76.1792	106.723	92.523	61.8209	84.7864	76.6376
NM_001000642	18.9129	30.255	18.7709	24.727	26.3125	19.218	24.6649	21.7474	15.6178	17.6213	21.943	85.1546	89.4944	72.7977	97.658	94.9853	149.553
NM_001000643	14.528	21.0432	19.3182	17.7625	18.4615	13.527	19.9768	14.559	20.032	16.8944	20.702	100.23	86.6123	111.666	161.13	102.11	127.704
NM_001000644	12.8327	11.9497	11.8605	10.6024	11.4204	11.1812	12.6574	13.6175	10.6791	12.8369	11.9025	58.0936	53.8243	84.9055	55.1891	43.3394	55.4552
NM_001000645	12.1364	17.2139	17.4954	12.6157	14.0363	12.7853	12.0442	15.0041	10.1853	15.5296	12.5866	66.388	69.4799	78.7218	70.3399	66.7017	78.3469
NM_001000646	35.2107	69.6612	54.2514	41.449	38.7102	33.2798	35.4372	31.0109	36.1429	45.6068	47.3163	177.829	176.779	149.663	72.2353	126.671	253.277
NM_001000647	11.5366	15.6358	15.5975	15.8496	13.6604	15.0347	16.2664	11.3056	12.9519	14.2903	11.0925	78.2476	65.1193	50.4378	63.0026	58.4281	89.4118
NM_001000648	30.0118	43.7537	34.2649	28.8189	23.4826	22.454	37.0544	28.5887	28.7772	38.4802	44.4877	96.8892	145.572	116.493	83.8339	93.1532	132.342
NM_001000649	20.767	40.8385	41.9886	36.7529	30.7412	26.6155	31.4341	35.7464	39.4211	40.3919	31.4193	320.307	261.897	238.717	237.445	171.62	238.035
NM_001000650	17.4161	35.721	23.608	18.8081	21.8048	16.618	19.3742	15.7446	14.2386	20.0282	25.3534	79.9797	88.1451	79.4819	49.0897	71.2924	87.2502
NM_001000651	44.3784	157.48	98.7291	89.1432	72.5586	58.5668	68.2777	47.6964	48.5801	69.0609	60.3082	195.65	202.859	175.894	132.123	129.522	242.924
NM_001000652	17.2402	30.771	22.5082	20.4782	16.4777	14.861	13.284	22.7693	15.2426	18.3271	21.3273	57.9893	67.9362	87.1209	58.3104	67.3346	63.3714
NM_001000654	24.1435	31.8641	18.9062	27.9463	31.0482	26.4488	26.9776	19.6773	17.9961	24.29	17.989	149.829	266.108	207.659	213.842	206.334	287.851
NM_001000655	20.9117	37.5798	24.0675	26.4226	23.7316	30.3142	26.9595	19.8463	25.4598	25.8001	26.5032	97.8671	134.993	122.383	168.823	91.1358	147.706
NM_001000656	12.7795	14.2517	14.4467	14.5006	18.181	14.7348	15.5989	16.8895	12.8361	17.2361	18.3987	92.4713	71.3063	120.321	83.8377	91.9557	90.4004
NM_001000657	36.9797	40.2449	41.1287	35.595	40.131	38.1772	43.5842	39.718	37.7459	24.5937	27.5292	147.831	176.365	124.484	116.289	100.423	130.974
NM_001000658	27.7996	30.7596	27.4465	25.5606	30.0294	27.0172	29.6252	34.9504	22.4476	34.1497	31.8647	75.7178	73.2702	75.7178	105.329	94.7604	106.128
NM_001000659	12.9782	14.3334	13.4046	16.4333	10.9482	14.9146	11.7257	13.6476	11.3178	13.0741	15.5172	53.446	63.7039	59.5014	55.52	55.781	61.6676
NM_001000660	20.2276	25.8684	20.7626	27.0011	27.292	22.446	23.3924	17.885	21.8526	22.8965	17.3402	70.5326	154.539	132.709	93.7099	122.922	95.4861
NM_001000661	18.8211	29.5396	26.614	23.4642	24.1871	27.4187	24.2836	23.4078	19.661	23.5167	35.5426	72.5302	75.6872	115.88	56.4459	129.861	129.987
NM_001000662	12.257	15.3226	14.5752	11.4597	14.5822	16.9369	16.2616	13.0959	15.1589	16.7515	9.9322	61.5923	63.4764	66.6394	81.5332	52.7546	55.6889
NM_001000663	15.1627	21.3798	21.0033	16.0676	17.5152	19.7419	19.8569	17.0539	16.1205	22.7784	23.2156	54.1465	70.2098	53.1851	56.1638	92.424	61.6718
NM_001000664	31.0218	27.5701	31.3391	25.3669	76.8627	72.9643	92.5131	61.5713	42.8543	73.8101	60.5776	159.566	273.545	188.103	222.69	117.955	252.572
NM_001000665	28.864	62.8678	38.3404	31.1662	31.7493	30.678	27.8012	25.6787	32.5455	39.9334	31.9319	101.211	67.9067	57.7842	88.6588	57.6049	107.276
NM_001000666	30.437	49.2398	50.3251	42.2843	38.9169	41.6854	34.5498	40.1101	33.6143	65.7592	44.9449	173.983	192.335	147.422	118.103	155.866	184.725
NM_001000667	14.4099	11.3604	13.6518	11.8629	12.1349	11.7746	13.5569	10.3729	13.3597	13.7021	12.85	74.9216	71.1573	75.0003	59.6616	60.309	65.4396
NM_001000668	21.0952	29.6583	26.9261	26.8492	21.5894	29.6674	16.2064	21.2296	22.3416	22.1357	29.7317	62.8147	70.7763	70.2921	51.9951	70.846	58.9987
NM_001000669	15.8403	14.9269	15.0243	16.4805	16.2633	16.4376	13.7533	13.8488	15.2661	14.9144	23.6049	88.6173	60.1489	55.604	66.196	70.7228	74.6759
NM_001000670	31.14	53.1745	48.057	38.4878	35.0309	44.0168	38.4143	28.5702	33.5155	68.7448	43.3601	129.772	214.881	146.656	96.3489	100.923	238.077
NM_001000671	12.2477	16.7611	15.1451	13.0223	11.5818	11.204	12.4222	11.2267	13.315	12.385	15.7419	44.8647	63.1548	52.1203	61.7962	54.74	59.1123
NM_001000672	24.8464	36.1723	25.8595	22.086	29.8954	27.2064	40.7518	28.5502	20.4677	26.8194	25.9992	77.7107	82.3463	83.8126	101.033	96.5201	85.0971
NM_001000673	12.5244	13.3652	10.1453	12.5806	16.0569	11.9108	13.5367	14.7987	10.8249	14.0865	12.7277	53.2118	64.4542	63.0402	97.3142	53.0824	60.29
NM_001000674	18.2842	20.0372	21.9874	15.8872	23.3443	24.4744	22.7948	31.5885	26.0344	23.8867	33.6789	115.596	152.49	419.242	175.556	130.778	195.714
NM_001000675	25.9236	67.9743	37.6674	42.0583	53.6908	30.4609	38.5571	31.9056	27.8587	36.5334	44.5756	99.9079	130.333	113.031	113.517	92.8735	136.335
NM_001000676	19.0472	25.2852	24.8016	22.9277	28.1306	25.5329	26.9336	24.6054	26.4982	31.6047	46.1052	58.0818	91.7334	85.964	55.2444	82.0776	70.1605
NM_001000677	17.944	18.3624	13.2208	12.3439	15.3378	18.416	16.5535	11.2983	14.0875	18.2795	18.218	57.8699	70.3165	73.2457	71.4321	66.981	62.9046
NM_001000678	24.2124	19.2997	16.8895	18.9322	20.9783	24.8505	29.2344	19.5341	22.1258	24.7542	17.5343	85.5197	74.6406	78.6972	79.5818	88.8118	96.1231
NM_001000679	11.604	14.8424	13.5648	14.0935	14.8291	16.9231	17.2196	17.6991	12.9267	22.5336	13.4552	206.547	203.239	180.666	113.233	129.79	146.948
NM_001000680	22.8242	23.4191	24.3276	27.1075	22.7438	31.7585	20.6679	28.2263	28.088	28.9748	31.1304	137.747	179.025	190.709	159.887	170.612	134.113
NM_001000681	13.2755	15.3487	14.8376	12.3536	13.3507	16.6901	13.2309	11.0552	11.6821	14.384	15.5269	91.2853	68.3909	62.3484	48.7958	64.565	85.1941
NM_001000682	12.2717	15.6517	11.8193	13.6584	15.9514	14.6138	13.8905	13.296	11.6692	12.5936	13.1579	47.4192	69.8386	63.1258	61.06	52.6363	58.5464
NM_001000683	17.9146	31.7272	18.5787	24.317	17.0231	21.6196	20.186	20.227	18.6672	35.2321	34.0773	96.4186	104.47	92.7008	66.3746	120.369	112.33
NM_001000684	12.872	18.4112	15.8941	22.552	17.9644	19.3548	19.3903	21.4305	18.3623	24.8436	30.4996	113.364	102.422	100.342	98.3335	74.089	83.0099
NM_001000685	13.0138	20.8738	14.993	14.9626	14.813	12.513	15.0786	12.1536	13.1921	14.9152	14.9134	167.334	48.4312	63.7222	60.2223	69.0347	72.8068
NM_001000686	25.1027	29.5422	23.6669	26.1498	22.4406	21.5092	17.0344	19.8861	17.2813	26.3673	21.5631	75.158	62.2347	83.2293	71.3289	63.904	89.3132
NM_001000687	20.2097	25.4161	20.224	16.9001	20.555	16.301	18.3238	14.1422	14.0744	21.5183	22.0201	84.5055	75.5331	68.0903	71.7203	73.674	79.9631
NM_001000688	26.0546	27.2277	25.0492	19.7303	22.4017	21.338	19.3285	25.4375	18.9871	30.2053	23.4022	116.938	96.8006	143.084	82.4631	102.093	126.94
NM_001000689	291.367	181.185	268.872	288.486	214.297	242.066	172.228	231.807	222.304	205.255	229.461	465.425	682.02	579.686	668.215	527.181	637.783
NM_001000690	28.0393	56.9699	26.9303	21.6082	27.3308	36.4996	28.506	30.2294	23.7733	29.0954	41.078	147.242	86.0205	86.9627	79.6985	67.7264	82.7098
NM_001000691	14.8682	29.7394	22.884	19.2499	19.303	18.695	19.1671	22.3355	16.2366	21.9451	21.9346	51.9634	69.9038	56.4123	49.0589	53.641	65.3514
NM_001000692	94.6468	108.052	84.3203	76.0195	82.6061	84.6839	70.8678	77.2518	60.652	74.3193	69.8459	253.209	231.207	151.159	138.83	153.881	157.386
NM_001000693	15.9465	16.4892	18.9121	14.7812	13.4731	14.8197	13.5093	18.806	21.6211	17.7403	23.679	50.8216	60.2849	70.9676	88.3612	54.934	71.1823
NM_001000694	13.7088	20.9533	16.1619	14.1339	19.3876	16.5725	18.7239	14.0927	12.0299	20.0897	16.2092	56.4591	52.7114	53.0321	65.6172	71.9434	73.5382
NM_001000695	23.3913	31.9266	22.3884	24.5096	24.7875	26.5748	19.9529	23.7282	25.3071	30.3934	29.8859	61.9677	69.3195	60.4299	77.0815	49.4402	61.8769
NM_001000697	26.0323	40.1111	26.7595	28.3254	29.7949	27.235	25.9995	32.401	23.2518	32.873	45.683	89.0953	193.633	103.342	157.27	85.2676	127.865
NM_001000698	25.3364	35.2259	30.3669	29.4948	24.4711	22.4922	24.0021	22.228	20.999	33.7522	25.621	271.239	89.9607	88.9244	245.072	113.529	274.488
NM_001000699	21.504	30.0075	22.7617	29.483	20.5868	23.2843	16.3529	20.3912	20.4889	25.562	35.2887	70.8225	121.692	101.282	174.186	108.967	95.576
NM_001000700	37.6912	50.1659	28.5139	45.6702	28.0424	22.6744	19.4625	24.6447	26.8164	59.2657	56.4217	170.33	102.61	166.635	83.8301	165.565	121.456
NM_001000702	18.5553	30.1052	22.4509	20.7259	19.9899	17.3025	19.7361	19.6421	15.005	23.5077	24.937	72.3544	101.317	88.695	53.8287	51.5829	87.9929
NM_001000703	19.9901	40.2742	21.1765	29.7754	26.7562	23.3285	23.2445	21.6374	28.6306	30.2118	35.141	73.9203	93.7987	82.1895	92.1998	109.269	91.2147
NM_001000704	17.7399	42.8453	20.2261	29.5147	19.0304	17.7576	19.5728	19.2441	24.3685	37.7702	46.245	74.7006	80.3547	96.5651	80.0431	72.5509	93.6857
NM_001000705	15.0106	23.4608	15.5511	20.7234	17.3062	15.0477	17.2174	14.2839	18.5272	29.885	31.9107	61.8631	80.6192	74.4729	69.5837	50.0105	80.9066
NM_001000706	14.6716	62.9806	22.9395	28.5759	29.2729	24.6288	30.2519	18.6681	24.7348	43.2268	39.5188	64.7185	111.736	66.5937	55.9193	60.931	145.136
NM_001000707	36.817	56.2047	35.7698	36.0662	43.4802	41.3661	49.6423	35.3712	37.8377	42.609	20.3724	88.6059	121.808	109.415	125.236	124.788	134.035
NM_001000708	52.0871	164.38	71.658	80.9511	53.2057	71.6663	56.8984	48.0851	58.1125	93.7377	64.5065	140.25	180.163	162.75	138.963	167.204	218.448
NM_001000709	35.6254	54.5012	46.8414	41.1164	37.447	31.6613	42.6643	35.2707	30.1249	37.8811	36.7552	157.321	138.042	123.964	96.623	83.9536	152.19
NM_001000710	44.8262	223.744	109.585	88.0704	71.2818	73.664	76.7527	77.4259	46.1952	98.5728	66.6998	187.189	444.312	162.055	204.321	190.536	340.91
NM_001000711	40.2455	90.8145	68.217	58.9371	72.1576	72.9555	74.6491	57.8898	53.4415	57.8605	48.778	144.309	194.978	157.874	164.445	137.864	240.193
NM_001000712	39.7723	77.5273	51.1757	59.809	60.6973	43.1018	41.0455	82.1915	65.1343	61.7232	59.4094	291.479	348.996	316.471	295.793	333.558	454.369
NM_001000713	20.8576	74.6154	36.4491	39.2902	38.0873	29.8763	37.977	31.7219	25.7465	55.4292	30.3111	103.9	163.689	77.5599	70.0003	80.886	161.446
NM_001000714	45.7459	178.178	78.5378	80.1674	58.1781	66.3074	51.4804	59.1567	73.4664	101.755	95.6797	178.911	281.679	334.766	132.2	229.713	406.592
NM_001000715	12.9023	31.9693	21.4778	16.3981	23.3722	18.0472	17.1041	20.2902	14.1929	22.0008	21.9278	85.9232	89.5481	83.9533	69.5796	75.2094	217.501
NM_001000716	15.3604	20.6045	23.8263	19.9755	19.7047	18.2814	18.2014	17.0855	15.3324	22.1086	16.0963	54.6497	49.6401	62.9127	53.3199	69.4659	60.6392
NM_001000717	20.2686	42.7101	36.6578	27.5421	23.7365	23.4113	22.3803	27.1487	17.9156	23.1396	28.4679	97.4466	93.2843	94.517	76.0598	108.698	107.759
NM_001000718	36.3426	45.9585	33.8909	39.5642	51.9852	43.3707	42.9166	38.3392	37.8522	51.785	43.0528	142.295	260.555	159.046	142.414	142.759	175.123
NM_001000719	32.0188	38.7458	45.3032	37.6366	46.5447	42.0357	39.1422	38.1714	34.8218	49.5577	38.0938	111.008	177.466	100.941	120.999	84.012	177.437
NM_001000720	16.5878	37.3952	19.7509	23.3245	20.146	17.2727	16.2985	14.671	18.4726	21.7199	33.9854	63.3754	87.5711	66.2706	60.1943	75.5845	65.7215
NM_001000721	25.6102	50.9635	24.7511	32.6419	35.9201	38.388	27.061	29.7846	27.061	48.0506	42.5109	79.7215	93.4211	121.146	92.0901	89.0429	81.6385
NM_001000722	32.3073	58.0842	41.8992	39.7867	45.1013	42.279	42.2656	42.9043	43.278	41.8451	39.3183	142.595	185.702	156.324	158.893	168.859	297.383
NM_001000723	21.9701	49.0481	28.5174	30.4942	28.4525	22.4873	27.9748	23.8053	27.0736	35.6063	32.5842	129.385	120.12	163.549	98.7758	79.3607	121.927
NM_001000724	18.8894	77.5239	44.3006	45.9225	40.0583	32.3799	33.5728	24.2517	26.8611	45.2564	35.1218	84.6677	176.093	100.968	52.8044	91.031	147.99
NM_001000725	13.2583	11.6074	13.8752	12.2823	13.2789	16.3609	12.3377	15.2391	15.3923	15.0515	15.2291	59.219	55.5405	82.8055	64.4419	66.1419	52.4102
NM_001000726	20.3602	26.8578	20.2402	18.7583	23.1952	18.7273	24.9709	23.0411	21.9334	22.6386	28.3	83.3376	90.4894	93.7408	119.187	66.6788	104.004
NM_001000727	12.1692	16.6208	17.4487	16.2524	14.196	14.8359	15.9131	17.1762	14.6547	17.7895	19.5639	98.7256	72.5441	105.765	78.4669	96.7967	68.2945
NM_001000728	20.6167	21.7986	22.8202	17.4153	19.4007	19.257	19.2431	21.6261	16.2763	18.2215	27.1015	47.31	59.666	45.7608	47.5636	47.1729	50.4185
NM_001000729	15.221	22.9242	18.3933	16.2464	23.3079	17.7274	17.8447	15.9559	18.0168	21.6148	30.0542	66.4902	75.4115	65.617	63.4465	55.7894	84.0928
NM_001000730	19.4904	36.5681	20.6101	17.7298	20.0122	16.7513	19.0529	19.8861	16.7924	21.0063	18.5005	115.762	89.8967	106.168	87.4928	78.3823	130.887
NM_001000732	17.7028	24.965	23.8207	15.3775	16.4411	15.0715	18.1161	18.3325	13.1955	19.156	15.2938	62.3292	95.2719	70.9432	73.1041	61.0332	83.4008
NM_001000733	10.6451	12.8579	11.4852	10.4535	10.8848	12.913	12.7937	11.0795	12.7746	12.5239	9.6764	76.8847	98.4115	91.7456	66.3033	56.1652	61.8247
NM_001000734	22.2084	63.4973	32.8652	35.7658	42.7709	28.8239	37.9724	31.5523	27.7403	57.9503	40.8201	110.101	126.608	125.502	83.9789	103.37	167.281
NM_001000735	25.1592	37.5115	30.1036	29.0759	24.0617	27.2803	40.0682	22.9303	17.2919	34.0733	32.584	70.57	90.8314	77.5326	62.3637	85.31	86.1263
NM_001000736	17.7529	26.5165	23.6227	19.2875	17.5425	19.5843	27.4426	20.2966	18.6481	19.5449	24.364	85.0945	122.333	131.254	117.599	127.88	102.742
NM_001000737	24.8963	57.5347	37.879	32.9321	36.6066	28.7702	36.424	35.7945	27.9948	48.1235	34.3782	109.318	113.553	99.5895	82.2264	113.963	135.945
NM_001000738	27.0917	33.5815	20.8079	22.0288	20.7949	32.2196	23.5298	20.4781	17.3345	27.206	18.4694	72.0367	98.3179	68.6935	87.6446	44.9261	83.5915
NM_001000739	17.6232	60.5643	30.5053	26.3171	30.9737	24.8413	17.5366	22.0376	17.8087	31.7869	26.2736	84.6441	111.912	76.1268	86.4242	80.7238	140.886
NM_001000740	18.1354	36.8685	30.1108	24.9686	20.6272	28.4003	24.7405	26.6555	22.887	35.0277	25.5653	67.4782	175.958	164.26	109.097	77.4284	109.117
NM_001000742	22.6069	62.7194	31.037	34.5538	32.4333	22.5109	26.2323	22.5035	20.9349	46.1074	39.4505	73.4668	93.3416	64.9908	56.494	71.9055	79.0204
NM_001000743	44.8804	99.372	58.8094	65.1003	59.7522	65.2586	47.4648	43.5521	41.6573	57.092	70.8153	137.407	265.827	128.108	141.772	151.244	266.659
NM_001000744	42.2168	55.8998	49.716	48.3147	69.5278	59.9666	63.5162	58.9507	46.4866	79.5419	68.1744	136.198	236.566	101.447	114.48	176.836	189.031
NM_001000745	29.1276	57.7665	37.1041	43.062	43.373	40.7337	65.2463	31.2623	28.7513	60.5982	59.8145	161.326	284.788	208.248	172.276	135.208	229.993
NM_001000746	34.6059	60.2103	35.9159	43.7126	54.021	45.2885	55.0714	28.5334	21.7813	41.826	41.9507	86.2753	181.376	97.388	127.999	132.419	165.981
NM_001000747	13.0019	18.3863	16.2174	17.1681	12.475	15.2432	12.8837	10.5445	13.7651	15.718	19.353	73.0695	63.0449	79.1695	60.6738	74.682	80.6691
NM_001000748	40.0262	102.229	56.3108	57.0952	46.1963	66.2653	56.8829	44.7828	45.9269	85.7876	76.5811	116.604	206.847	232.472	96.2563	114.625	264.867
NM_001000749	19.5239	18.1171	16.5012	19.8029	16.2633	23.1869	17.5551	18.7005	16.1654	21.9423	23.0053	409.037	110.377	106.23	109.893	92.8064	132.175
NM_001000750	47.1216	141.763	96.6265	79.5079	114.397	111.323	110.101	149.714	156.986	78.85	129.23	347.547	357.005	252.873	703.256	249.435	475.66
NM_001000751	109.715	178.341	115.852	169.706	206.283	189.059	155.075	158.054	151.695	176.298	106.346	665.782	844.165	536.809	635.828	510.959	1062.59
NM_001000752	75.1803	97.827	94.739	82.4989	106.457	115.016	113.6	90.3534	82.7942	66.4579	37.9922	349.279	488.029	392.659	452.002	251.23	453.154
NM_001000753	18.3831	41.4939	28.1113	18.9795	35.6136	33.4764	35.1831	28.8602	26.1038	29.3179	19.0578	150.457	197.823	221.154	155.248	187.788	169.402
NM_001000754	13.7699	13.2994	15.6499	13.2528	46.1446	40.6287	28.6256	30.763	28.4727	37.0372	27.4072	84.1023	106.249	132.801	147.628	103.669	144.28
NM_001000755	21.1852	31.6631	24.2429	22.9499	24.9161	24.6322	19.0844	20.7112	20.5136	25.8261	26.759	65.5993	65.5254	58.154	58.0024	51.1098	56.3849
NM_001000756	25.5853	57.4346	36.3849	43.6624	40.5608	31.6153	32.9726	20.3055	21.7527	30.5403	31.3383	121.948	198.633	171.204	196.899	110.236	233.166
NM_001000757	20.174	19.6553	19.6154	23.7908	19.5695	17.1718	15.2425	18.6089	19.5124	26.1211	18.7015	94.2879	119.096	98.1692	69.4884	55.3294	70.4698
NM_001000758	15.6469	18.0822	13.9059	14.3182	18.4413	14.7457	13.01	14.9237	12.8744	13.2668	14.6299	62.0427	55.0419	51.9687	70.8589	58.4089	66.6817
NM_001000759	32.1996	63.1061	38.2211	38.3403	43.093	45.0222	31.7663	32.7465	41.5443	41.7759	47.9809	76.4307	123.314	91.4238	62.8073	86.5339	89.1781
NM_001000760	41.3205	77.2606	44.015	38.3352	44.2555	46.9885	42.7655	38.6697	28.6453	55.7401	42.9844	83.348	132.371	192.252	150.713	110.416	179.991
NM_001000761	16.6404	20.2619	16.563	15.9616	19.5185	22.6087	15.546	18.2478	16.6196	29.6325	17.6652	66.6777	59.1534	97.1089	68.7383	96.573	59.0074
NM_001000762	24.205	49.9554	51.9418	50.6789	34.2396	34.4112	35.7859	31.4377	34.1097	31.3957	35.1851	72.0246	102.304	118.395	188.321	98.4076	157.863
NM_001000764	35.6331	99.3316	52.2073	52.1988	36.932	37.5993	35.4594	36.9865	39.4743	56.7239	55.7686	305.746	150.003	101.117	104.692	90.7721	291.436
NM_001000765	30.6402	95.225	67.2139	42.4263	51.4369	47.3349	58.8986	71.9379	51.2594	96.5708	59.174	221.567	289.039	188.321	252.585	203.446	440.895
NM_001000766	21.3224	56.936	34.2879	35.5003	45.4358	38.8494	44.2984	33.036	33.269	37.1247	25.0794	168.475	382.999	319.192	193.207	236	341.322
NM_001000767	16.9159	26.0819	26.401	21.1384	17.0738	15.1288	15.7926	18.4977	16.8484	26.8301	20.2525	80.6884	128.951	146.888	96.8221	111.534	93.1533
NM_001000768	15.9128	36.6452	21.8814	20.2918	20.4742	20.5214	22.1177	11.4659	21.9988	26.2756	29.7594	82.9938	104.048	88.1794	95.729	122.753	104.202
NM_001000769	23.6123	96.2708	39.2409	41.6693	31.2958	34.2767	36.4783	34.2023	32.5968	59.0488	53.7394	74.4673	177.91	82.3783	75.5086	93.6121	167.14
NM_001000770	67.6218	141.363	78.3976	83.9954	87.6709	98.4415	104.385	92.5544	82.7999	130.859	132.279	224.55	301.243	207.503	215.388	155.749	304.688
NM_001000771	569.025	1580.51	1116.11	451.019	897.899	951.457	950.19	867.822	735.407	764.752	399.051	1542.58	2622.75	1587.58	1461.01	1385.34	2438.79
NM_001000772	188.649	453.173	346.064	350.563	298.938	292.597	290.661	247.226	214.728	244.348	243.239	655.496	697.483	478.597	293.314	530.585	839.849
NM_001000773	15.9659	43.6444	22.8823	20.7874	29.5191	19.7808	26.1754	24.0034	19.5313	33.856	19.1364	141.494	302.922	250.668	159.965	232.087	238.455
NM_001000774	73.469	334.75	174.698	144.062	134.965	118.637	129.674	110.532	113.137	223.408	188.185	434.13	788.082	377.218	308.572	391.887	1007.89
NM_001000775	22.1973	77.2742	44.9181	41.4589	43.5389	26.0092	38.088	30.1783	28.8096	41.6709	24.4033	325.981	251.805	288.875	265.542	287.212	450.264
NM_001000776	16.6387	21.4328	16.8397	14.1038	21.6862	16.4943	21.6269	15.6582	13.5	19.9638	14.047	96.5045	90.8933	101.681	72.1742	94.0108	103.546
NM_001000777	108.089	364.407	188.056	178.503	121.402	94.3313	85.6182	115.089	137.761	214.436	118.424	460.045	773.028	505.354	384.863	535.382	827.44
NM_001000778	55.8802	144.685	77.8557	77.1771	60.9026	66.5321	42.0489	62.3044	89.8716	70.4519	103.407	399.75	412.608	406.065	251.86	469.182	414.729
NM_001000779	226.554	581.932	293.568	314.85	389.524	356.072	373.4	272.519	249.249	452.877	314.401	666.728	1518.69	718.083	491.333	546.725	1486.2
NM_001000780	41.366	82.0226	47.7069	94.9679	42.0366	29.4195	39.9972	31.9509	44.082	54.0924	51.7239	114.97	202.164	116.863	96.3261	91.3888	164.627
NM_001000781	45.6228	138.746	68.2268	70.003	63.3552	64.6845	75.5894	53.3501	55.8258	75.1817	59.1192	173.309	199.981	150.104	121.65	217.25	243.314
NM_001000782	11.6788	40.7265	20.9054	21.2182	18.0858	14.2275	16.0971	17.6873	19.4369	19.342	19.265	151.353	92.1571	107.981	152.933	97.5886	108.033
NM_001000783	30.2363	85.099	68.2345	59.0477	56.3504	51.6348	67.498	57.3997	43.9701	69.2876	69.2236	249.259	397.002	458.505	189.288	256.213	490.104
NM_001000784	33.3195	113.358	50.6692	53.4825	42.3209	36.0987	35.8456	38.5859	38.7824	58.626	64.3701	103.239	190.778	170.666	93.3442	100.44	168.382
NM_001000785	96.2401	306.278	163.858	139.754	129.141	158.158	110.559	116.142	103.292	131.658	102.062	243.611	375.973	252.746	206.899	249.86	368.056
NM_001000786	32.5534	68.8981	33.3247	36.8693	27.967	27.3867	22.767	24.5893	30.6556	43.113	50.2482	76.7151	88.3859	79.4925	73.525	64.2521	135.103
NM_001000787	61.8212	176.549	89.6375	89.142	41.9555	56.4131	76.7249	68.1506	72.6138	69.5684	64.8462	129.176	245.76	174.318	235.196	112.322	149.747
NM_001000788	116.867	289.523	199.635	211.098	271.431	263.445	277.655	191.319	192.506	206.543	208.081	533.973	889.414	749.437	445.194	492.183	849.353
NM_001000789	22.1845	31.99	26.2554	26.3184	25.6864	26.5916	28.5509	23.1891	26.3637	21.4721	16.8057	222.648	149.664	131.995	111.346	119.801	118.157
NM_001000790	24.4142	38.22	24.6585	27.3894	19.7273	23.8849	22.5457	28.1126	25.861	29.2301	25.7173	64.4768	84.732	74.7516	87.0783	57.7437	74.2886
NM_001000791	12.9696	17.5737	15.1543	18.0049	19.3338	17.4326	23.3498	19.157	23.8294	18.2583	23.9956	45.8932	59.6881	70.6251	81.5115	56.3558	75.5365
NM_001000792	42.6213	42.2494	31.5142	35.5182	34.443	39.6108	33.6867	27.8711	25.5416	38.1254	33.7536	72.9223	107.983	119.131	96.7915	68.7517	85.3672
NM_001000793	37.1811	40.7358	39.9059	39.0311	33.0223	34.593	27.3411	33.1199	34.005	34.591	32.1922	100.059	80.0264	85.6693	77.0526	66.0065	121.907
NM_001000794	65.4058	102.526	74.1353	108.253	74.4678	88.4726	64.8294	87.5405	107.145	66.3639	59.5347	384.057	775.462	394.712	428.345	355.423	489.18
NM_001000795	17.2165	23.8944	22.3234	19.6285	18.8903	19.0651	19.8776	16.4628	14.8354	25.5866	16.0863	90.8447	93.2713	105.584	98.2814	61.9302	85.0403
NM_001000796	12.3235	23.5132	19.6718	16.737	14.7659	12.9267	18.1371	16.5675	13.558	20.9612	18.2583	76.6944	85.2708	92.2971	137.759	78.3402	80.8707
NM_001000797	16.6034	17.5816	17.5084	17.7112	18.4223	16.4099	15.4107	16.6456	17.7823	19.4507	23.966	63.2613	61.6014	78.3404	47.4173	65.1111	75.0057
NM_001000798	20.598	51.8188	19.6314	28.1666	18.9395	20.7058	20.3593	17.3096	25.9047	28.6779	18.8273	104.314	95.4918	79.5778	189.536	60.6308	91.4039
NM_001000799	21.8267	28.0718	22.1494	20.3639	26.7575	20.4589	19.4184	18.0768	21.4873	38.5682	21.5377	70.4843	97.0026	64.7072	73.4447	72.5103	81.1291
NM_001000800	17.9015	15.1235	14.9254	16.6253	19.796	14.6546	16.3467	17.0388	15.8056	20.9757	16.4179	94.3188	54.5311	88.4772	270.416	51.1229	46.7679
NM_001000801	16.1127	20.1534	15.7008	14.1675	19.9265	19.6743	16.5368	17.7078	15.3965	22.8588	22.8473	65.3394	58.6154	78.8995	100.611	77.0901	72.2402
NM_001000802	15.7832	28.4206	20.1728	19.4786	19.3658	20.8868	16.0283	16.0232	19.157	24.1568	23.0908	163.771	83.3203	83.4146	87.7566	108.053	83.9824
NM_001000803	25.8203	41.3884	32.4742	30.7735	30.7696	23.5751	30.9185	27.3015	20.0689	31.1039	33.2638	90.7539	124.287	75.2253	83.4209	74.3297	126.881
NM_001000804	14.9466	15.3527	13.7828	16.9623	14.5351	16.0451	14.2461	13.0092	12.4088	14.5407	20.4814	100.889	88.0088	182.928	58.7252	69.0725	58.8901
NM_001000805	18.2499	34.0331	22.8298	30.0493	41.5454	39.8091	31.5818	40.9867	37.0906	52.7268	28.6336	94.9454	122.377	87.1732	137.115	114.325	128.766
NM_001000806	11.7933	12.4333	12.5401	11.2148	12.4121	15.8471	13.7524	12.9756	15.8443	16.8335	14.8928	129.522	107.253	112.54	101.149	100.608	121.917
NM_001000807	42.3905	111.635	59.4351	64.009	52.125	61.217	46.812	49.8384	44.4122	63.5029	53.3256	108.285	151.443	81.737	79.4758	157.249	150.583
NM_001000808	48.2671	149.292	88.6	81.5663	68.5773	49.8791	53.771	52.6337	39.6812	97.6497	105.817	139.048	534.837	357.31	137.283	247.453	454.826
NM_001000809	21.0537	22.7402	19.1972	23.1245	24.1023	22.7496	18.4481	23.7001	22.5785	24.8608	28.4421	93.1835	79.69	119.546	112.749	105.606	95.1794
NM_001000810	10.8572	14.3089	12.0256	12.032	12.7891	10.5229	11.7781	12.6954	12.002	12.902	14.2616	47.1532	71.5803	63.3578	56.1999	55.0523	52.7764
NM_001000811	14.6072	22.3602	17.8014	18.5479	14.133	12.5583	17.1653	16.4048	16.153	21.1773	21.8846	61.3002	62.027	106.174	86.6269	99.1915	79.2712
NM_001000812	14.9336	22.6461	21.6904	19.3088	16.9767	18.3314	15.0092	15.2774	15.3361	16.3911	16.3676	71.9025	121.738	102.272	91.6403	66.8109	94.5785
NM_001000813	78.9696	175.735	121.199	124.337	89.4281	80.1873	87.4711	73.5049	86.177	85.5049	101.193	276.173	436.023	221.083	413.735	576.033	395.325
NM_001000814	9.556	19.4131	12.2241	12.6217	12.1233	17.5976	14.0056	11.9259	12.2878	15.4243	12.4611	55.6592	55.1768	52.3182	69.4884	49.6785	95.2887
NM_001000815	28.6569	26.3804	31.0966	26.2398	35.9457	38.9014	33.6932	28.3241	22.3317	27.4338	27.9015	102.02	147.138	79.9563	171.862	86.6135	124.843
NM_001000816	24.2142	33.8129	35.0666	30.072	27.0424	26.4421	31.5582	25.4375	26.6701	28.7015	46.1183	152.841	75.0057	97.0125	82.8668	56.3592	113.399
NM_001000817	12.6043	21.1465	14.0559	14.9286	17.6656	15.9794	13.8044	13.9018	16.0061	15.7525	16.6847	106.137	168.927	118.525	108.737	85.7634	63.6367
NM_001000818	27.6728	50.7267	36.1183	31.4932	36.5858	25.6869	30.1692	34.0302	34.7875	46.2825	37.9175	117.964	178.202	161.771	133.403	121.832	141.032
NM_001000819	33.7013	28.7854	21.933	21.3551	28.5502	25.0929	25.2867	37.0126	27.5507	24.5363	26.8388	79.831	80.9442	103.69	82.4032	74.5811	103.48
NM_001000820	21.7854	65.7206	30.232	28.8401	24.9735	25.3802	20.5325	17.5659	19.6701	33.9621	41.0903	98.2019	99.741	83.8179	83.0937	114.285	108.804
NM_001000821	60.117	221.593	119.536	116.071	90.2049	83.0961	86.7466	78.336	71.7502	98.0094	86.6189	435.738	546.024	459.835	313.866	290.02	690.892
NM_001000822	20.3115	36.8238	29.1071	21.7256	26.7097	38.1998	29.6781	32.0724	28.241	33.9635	22.6273	117.675	91.2467	88.5933	71.6394	64.2066	110.31
NM_001000823	21.4243	56.1323	26.9459	27.2183	25.7506	26.0751	30.0354	24.0548	16.2094	29.5703	26.4969	62.8425	84.2474	69.1145	75.3777	64.0338	87.3822
NM_001000824	25.788	38.7729	27.4328	28.1602	33.8995	28.3301	32.6513	22.5826	29.9814	35.0515	45.7724	131.007	118.003	112.385	92.9481	85.7101	136.15
NM_001000825	12.5788	14.47	15.0957	15.4228	14.434	11.3055	13.7971	19.2649	19.7301	16.5909	16.8993	65.3112	94.8233	71.725	74.6341	92.2229	88.9529
NM_001000826	21.1004	40.9415	28.6413	40.5908	20.6045	20.1188	20.2625	31.2202	25.979	38.6192	19.8741	66.1162	85.7938	75.625	70.9015	170.947	81.1963
NM_001000827	11.4281	17.7901	18.4289	14.4411	12.8812	11.8569	15.1068	12.1596	15.0353	14.9661	14.4626	64.2523	86.7881	104.233	65.7977	79.2109	97.8234
NM_001000828	26.7454	45.2591	21.3196	30.0484	28.8565	20.9535	20.602	23.8929	28.2825	23.8063	36.9529	79.2863	145.409	79.6361	87.1028	92.4998	114.894
NM_001000829	50.4641	132.428	74.2779	51.6194	81.0128	90.3312	78.8717	58.2042	61.9789	83.3074	58.5701	228.209	303.632	180.723	134.674	209.139	261.827
NM_001000830	19.5656	25.885	21.189	22.32	23.0228	18.5168	25.0762	20.3384	17.1851	20.1183	19.9031	72.2538	77.0156	77.1871	101.277	62.3959	120.157
NM_001000831	30.8236	87.6132	44.1229	34.8037	37.782	32.7025	40.4823	32.5109	34.2614	57.1181	38.6248	84.9309	116.955	81.6489	79.6319	66.6328	178.423
NM_001000832	30.2851	63.1894	34.9367	40.7913	48.8681	47.3927	60.5752	34.5755	29.5147	37.3719	29.9106	263.652	291.773	193.833	245.268	241.641	411.626
NM_001000833	19.0041	19.7548	17.756	26.404	22.0218	18.4674	24.2818	15.76	16.0781	16.9366	15.8591	82.3827	99.1171	95.381	111.608	77.7084	102.968
NM_001000834	20.6929	35.5326	26.1632	30.1811	27.4593	30.2812	33.2739	34.5715	23.5113	43.1986	41.6482	96.0666	128.628	141.512	70.1023	100.002	180.22
NM_001000835	28.713	113.445	38.2545	38.4487	35.5584	36.2635	39.7593	24.8584	17.3313	53.784	51.3371	110.366	259.412	132.183	98.4918	126.733	175.971
NM_001000836	24.7399	34.1215	27.0141	22.2435	29.15	23.9794	26.7089	23.3039	20.7541	29.831	35.2071	89.0116	97.2399	100.945	130.583	65.6767	70.7272
NM_001000837	21.4586	37.6252	29.2001	24.753	32.4825	28.9622	41.8554	31.0384	23.8435	31.6933	29.5821	114.445	121.558	103.379	62.0375	90.9021	111.37
NM_001000838	29.4376	62.3779	43.0205	32.3923	30.3919	25.4866	32.5122	27.345	37.6214	56.795	47.4686	76.2323	123.526	92.4267	80.7805	76.9607	117.566
NM_001000839	11.1131	18.2924	15.514	12.1078	13.2674	14.3422	13.6068	12.3568	12.4833	10.6815	13.697	50.2658	57.866	49.7303	51.4605	47.2009	49.9207
NM_001000840	23.8963	31.4975	24.4552	35.4385	20.2041	19.2096	36.4133	21.5629	19.983	27.5393	25.7215	97.099	105.103	99.8955	85.8923	70.1272	129.01
NM_001000841	21.4589	47.1582	28.0145	25.7042	35.5414	28.6396	34.85	29.9367	26.6657	32.3708	40.5131	76.7039	70.1543	74.3818	92.1299	93.6959	89.5795
NM_001000842	35.5026	84.6164	59.6086	47.7165	54.781	49.3864	65.8228	46.7187	61.2099	73.7534	47.8431	188.017	228.58	119.745	148.991	145.587	302.933
NM_001000843	73.6837	119.159	111.929	87.1155	105.574	83.5143	92.6068	66.8764	70.0259	96.694	79.3867	255.03	297.371	304.339	188.33	159.64	238.842
NM_001000844	16.8727	21.67	17.4087	20.8192	18.3837	17.7556	14.6698	20.7581	17.4775	18.1689	25.5153	44.3321	72.3867	72.9523	84.1943	54.351	78.9288
NM_001000845	12.2269	17.4395	13.167	11.7114	16.1652	14.4592	16.5542	13.608	13.3673	13.9222	13.6341	47.6706	55.3052	58.2289	60.8051	42.582	49.7556
NM_001000846	20.8694	34.0528	20.9708	32.2896	20.8988	24.8644	24.1816	17.0574	21.0146	31.9651	20.7741	96.6317	165.906	124.681	224.273	136.513	101.601
NM_001000847	35.2883	51.587	45.3635	54.5747	61.2472	39.5847	43.9838	39.915	35.1053	41.7903	32.9696	206.285	279.275	248.113	315.91	196.879	225.266
NM_001000848	33.6833	86.4729	49.1377	47.0902	42.8583	29.7918	44.1352	48.626	49.8304	46.6667	62.5408	221.68	263.806	189.737	170.729	237.835	207.149
NM_001000849	10.9564	12.537	18.772	11.4209	14.9586	19.5695	16.7388	17.7122	12.0897	21.9434	13.3096	68.0174	75.6984	96.8372	94.7735	75.9555	72.2845
NM_001000850	47.7155	129.391	74.0974	103.861	54.534	64.9381	58.6338	59.991	53.4926	93.2851	93.4438	106.891	177.593	116.469	138.87	115.35	155.184
NM_001000851	58.7726	93.3308	82.6332	90.0404	86.2043	78.443	84.4142	77.2051	79.4834	72.4391	45.5724	174.761	275.366	191.862	200.124	195.892	329.734
NM_001000852	17.1377	17.402	21.6738	22.9208	19.2122	17.147	13.7681	12.4107	21.8942	14.8397	18.2593	82.1694	104.491	64.5801	105.267	101.111	94.3892
NM_001000853	128.378	167.207	149.05	138.734	99.0745	146.31	143.207	122.011	108.506	103.474	72.6383	405.647	656.312	537.354	553.352	381.367	533.27
NM_001000854	38.1553	47.4746	42.782	49.966	64.2958	76.4914	66.2468	59.6002	77.7222	57.3118	60.4483	255.245	336.654	327.819	301.15	189.99	303.211
NM_001000855	27.8192	55.9256	32.3519	26.9422	28.1216	25.6742	25.6476	20.3696	21.7365	25.8193	48.2974	100.436	93.3822	140.584	61.7829	114.471	91.8714
NM_001000856	25.8638	39.224	31.6909	36.3376	33.2338	26.5716	30.1544	21.6919	24.0585	24.0824	22.8879	100.781	185.945	114.823	112.6	90.612	137.164
NM_001000857	29.5017	45.0308	33.7155	34.7058	28.4431	25.042	31.0015	25.5373	32.2844	29.8287	22.3833	217.651	389.676	278.176	232.157	234.283	288.729
NM_001000858	61.9209	49.9332	46.3628	51.717	103.492	97.6908	108.869	77.7648	79.1223	86.7963	87.2155	220.433	405.481	382.874	213.993	236.247	305.495
NM_001000859	25.9802	34.2749	33.0601	30.8072	24.9509	27.6865	30.7419	29.2873	28.05	25.1239	35.3671	206.286	167.355	174.935	130.887	117.374	199.767
NM_001000862	37.6062	115.379	56.84	55.0906	51.5936	39.3275	55.6648	42.0106	31.6194	73.6363	71.6142	97.509	188.917	69.0515	88.7648	82.8695	199.604
NM_001000864	19.3332	27.5421	17.0854	18.8901	19.5966	18.4002	24.1692	15.3277	12.3319	22.9775	20.3452	66.1498	67.5554	64.41	79.7249	67.3348	82.4127
NM_001000865	26.1414	43.0246	29.6128	28.4527	29.6843	29.32	30.4093	28.9934	22.6157	33.3237	22.0815	74.0755	83.7854	61.3906	87.3237	82.977	89.6701
NM_001000867	16.1465	20.9117	18.6416	15.3651	15.3246	18.5828	23.8744	19.5082	14.6861	24.8901	16.986	104.712	79.4256	104.545	119.121	87.2932	88.2079
NM_001000868	32.3563	49.989	47.7228	47.6688	44.0421	41.3661	41.5647	34.2216	32.603	50.1931	46.7835	87.7047	153.929	94.7044	101.122	123.4	125.049
NM_001000869	33.135	31.0168	25.3316	34.1454	35.4627	28.9846	41.1277	45.3676	50.0928	44.7387	44.4755	101.235	148.817	142.655	131.003	169.018	104.641
NM_001000870	22.4235	37.7671	31.041	32.273	22.0093	23.012	27.4683	26.4976	22.0767	31.1575	31.6153	89.5494	116.721	74.3196	55.3033	76.2873	129.708
NM_001000871	38.7142	99.3997	67.3979	62.7702	70.4163	63.4883	67.6276	55.6153	41.8793	75.9444	64.8968	205.149	302.95	264.847	189.753	207.612	293.315
NM_001000872	23.4679	22.0906	25.273	29.0055	29.9991	18.4925	25.9297	25.9756	19.2167	22.1293	31.9258	68.9768	73.1358	51.7125	83.9565	70.4292	70.3916
NM_001000873	17.1405	23.1163	13.9984	16.0179	17.7879	16.4592	17.6556	26.4069	14.5005	24.7298	20.7853	56.8594	58.3306	74.4981	67.5049	53.9834	55.9041
NM_001000874	18.184	25.372	20.5997	19.483	15.2292	16.0223	16.3212	16.5208	17.2519	19.6786	21.5235	87.0173	101.457	62.1763	93.2103	45.5705	90.9598
NM_001000875	12.9767	16.0495	13.6531	14.2688	13.5071	16.9754	12.571	13.8841	12.7484	16.7884	14.1127	55.6206	56.5363	61.6852	61.0068	56.6218	58.8416
NM_001000876	16.2751	15.9349	15.1221	17.4558	17.7051	15.1016	17.8357	19.3408	18.4858	17.2631	18.883	74.6204	97.5473	87.1209	71.9783	58.0293	74.8879
NM_001000877	22.9554	83.4597	34.4547	42.1768	27.2525	22.7537	26.4095	25.4667	20.7152	40.8063	50.1104	98.1394	161.061	95.9017	106.989	90.4965	247.123
NM_001000878	51.2911	61.9773	53.9821	57.9631	42.8135	29.4639	38.4453	55.9674	47.3272	59.3432	43.7562	141.806	266.677	188.704	360.534	165.594	271.015
NM_001000879	10.2602	16.8573	10.442	11.0923	11.7471	9.7822	11.2614	12.3283	12.6389	13.325	15.5628	61.8791	57.1025	53.6603	56.5126	72.0276	56.6567
NM_001000880	11.7957	14.4038	12.0687	12.3516	12.302	13.4948	12.2043	16.0443	12.4139	11.7357	13.2499	52.0232	52.7967	60.2271	55.0049	50.9141	59.2718
NM_001000881	10.784	16.0629	12.0948	13.4873	11.4401	11.6603	10.3482	12.7217	15.1393	11.8641	14.0541	62.8041	57.8035	61.0321	87.5983	61.5504	86.7666
NM_001000882	12.6794	15.3968	15.8407	16.613	14.1144	17.6194	19.2048	11.6824	12.5258	14.1454	13.7753	49.6998	61.7999	91.186	60.0989	57.1463	67.4107
NM_001000883	17.7978	50.3169	24.1307	23.2031	22.4786	24.3951	19.5155	16.8189	20.6906	28.1709	32.2456	81.4954	103.882	64.1832	72.2366	65.0241	81.0165
NM_001000884	19.3486	29.2272	29.6208	26.9777	25.0246	20.5997	24.9223	22.5393	15.4772	34.5345	25.2623	91.0716	98.4965	87.9651	86.8835	73.2263	79.8546
NM_001000885	17.5336	22.7587	22.6427	12.8272	18.7449	18.0453	18.3464	17.2796	19.3267	17.4205	15.5478	75.4748	94.9681	91.573	79.0669	111.682	92.8461
NM_001000886	90.3896	280.64	126.616	138.588	221.426	210.854	237.047	160.36	217.779	213.643	199.961	431.628	657.474	439.429	511.132	399.503	644.887
NM_001000887	57.5479	248.835	100.417	134.564	137.543	92.7046	77.2344	99.5741	100.177	162.958	165.383	336.719	431.257	255.52	156.37	271.518	479.353
NM_001000888	20.2704	34.5724	24.136	23.8849	25.383	22.4746	20.8778	20.3701	19.8484	20.5024	20.5963	109.583	136.675	112.295	82.3061	96.5549	90.3763
NM_001000889	12.2823	20.1617	16.509	18.1371	13.6864	13.7869	14.8238	11.7514	13.8399	13.2955	14.1135	66.8636	129.429	134.276	84.3309	97.1074	81.762
NM_001000890	26.8724	52.9474	31.5766	27.9804	29.8704	41.7217	48.3279	35.2188	19.819	29.734	25.5814	140.373	186.657	142.148	123.188	86.4728	211.492
NM_001000891	19.2064	56.3447	36.815	33.5921	27.2127	31.3861	17.3664	29.9502	22.1676	42.0162	40.7438	91.922	136.266	113.193	88.4492	84.0082	179.233
NM_001000892	121.633	566.745	216.292	275.463	238.242	241.378	266.419	179.861	168.883	299.876	227.63	573.455	860.288	442.657	290.076	457.856	883.667
NM_001000893	42.6573	58.2802	20.317	33.4365	131.37	96.8192	104.346	77.4901	89.9801	99.5965	76.1179	424.429	533.172	409.926	280.144	263.182	557.94
NM_001000894	26.6766	49.9766	29.3405	27.8524	29.1342	35.2546	39.6119	27.4622	30.9554	39.1506	30.9316	105.302	145.098	174.06	73.6792	466.813	307.072
NM_001000895	57.6321	138.432	99.1938	75.0974	67.7715	45.8705	57.4545	45.5902	36.0077	62.878	42.4495	204.787	309.792	172.373	207.561	231.389	270.19
NM_001000896	21.762	22.5485	18.624	21.2796	17.0209	24.3488	15.8682	16.093	18.4454	19.0672	19.322	87.4265	85.0028	89.2878	62.4887	113.165	115.431
NM_001000897	24.5834	33.8512	29.4055	24.7621	29.1665	38.6671	28.4805	35.8019	56.9771	47.4104	36.2111	191.009	142.37	209.17	127.5	127.934	138.254
NM_001000898	43.8762	121.426	63.6124	64.691	57.6498	59.1115	52.76	52.432	50.5598	69.2488	85.6273	219.251	214.702	408.233	123.316	232.017	446.372
NM_001000899	38.0151	107.092	53.8628	56.3655	62.8389	64.8822	52.2869	71.306	65.0106	81.5553	73.5732	143.444	369.272	164.743	179.298	191.141	401.51
NM_001000900	22.2874	61.873	30.7173	35.5896	27.6018	19.8279	25.6108	18.1383	26.7017	30.8579	26.7945	121.246	138.887	116.594	97.3586	74.7346	137.213
NM_001000901	164.267	757.228	368.32	327.336	390.877	360.723	398.856	295.404	278.355	518.953	363.712	919.041	1454.58	713.393	938.321	627.957	1301.34
NM_001000902	60.3764	164.583	85.9518	83.4559	96.4401	94.1229	92.5481	68.4154	57.5781	104.809	54.71	195.16	451.413	179.539	107.141	201.794	461.331
NM_001000903	92.3566	366.649	185.482	147.028	143.8	169.503	158.604	110.989	108.722	229.932	174.701	264.358	438.373	313.951	179.827	185.449	658.102
NM_001000904	71.965	249.867	105.098	109.035	87.7687	104.667	113.639	82.8662	63.2165	125.646	124.135	179.461	384.261	288.085	180.78	226.066	354.278
NM_001000905	90.3939	418.029	176.784	148.727	168.416	203.557	175.71	146.857	144.372	247.625	175.308	460.88	596.515	594.586	307.366	526.787	749.286
NM_001000906	36.3497	58.1993	36.5868	40.6806	33.8308	30.9288	31.063	25.5105	30.738	40.8654	30.2832	119.203	179.15	172.155	141.768	145.626	140.1
NM_001000908	38.3961	123.787	49.8071	55.2465	108.29	104.543	99.61	82.9515	80.9847	82.9332	87.4994	216.445	193.289	170.395	197.432	151.877	294.449
NM_001000909	16.9138	42.5561	29.7045	25.2706	20.4118	16.3903	16.0163	21.8315	18.3706	32.182	20.0171	148.072	127.674	94.7392	81.351	86.094	101.863
NM_001000910	13.3256	19.4133	13.2202	16.2437	15.1024	15.2381	17.7637	15.3022	16.3527	17.3402	22.3623	59.7018	73.8057	61.9627	129.306	71.4391	113.035
NM_001000911	13.6556	31.5813	18.5765	10.0842	28.6444	29.9539	28.3346	20.5952	24.8849	29.5348	22.5381	99.6096	175.528	116.848	104.85	91.5879	174.21
NM_001000912	14.7287	26.3246	18.0104	15.4367	12.0226	12.7125	17.5938	15.1965	11.6738	22.2361	18.767	50.2422	76.4907	86.7498	87.6779	62.4234	120.403
NM_001000913	26.9842	38.9317	31.208	28.0762	27.2539	41.6278	30.1747	29.9901	30.7484	41.7609	38.385	163.178	244.627	144.641	312.207	172.356	314.291
NM_001000914	44.7704	95.2661	58.6928	66.3066	47.7469	49.3525	47.504	45.8987	56.0808	65.0882	90.825	218.583	185.194	195.299	161.105	142.253	183.979
NM_001000915	32.0249	49.9729	40.7483	48.7188	62.2567	62.5659	47.7979	50.7304	47.3212	65.738	41.7794	118.762	216.873	140.011	112.467	117.02	163.87
NM_001000916	15.326	24.6689	15.7342	17.1129	16.3832	17.6158	16.7407	15.9826	13.7	21.6613	15.5678	61.1175	69.5027	70.6894	39.6994	47.3296	80.8889
NM_001000917	100.14	416.974	191.664	189.887	152.989	130.232	125.993	106.993	93.6926	183.161	182.947	175.785	328.851	206.225	206.56	172.341	458.828
NM_001000918	47.4389	93.782	63.4871	48.2599	53.3302	52.5551	47.4101	42.5732	52.1947	89.2743	72.4669	211.671	306.346	179.171	218.435	148.201	215.297
NM_001000919	30.863	38.6237	32.6419	31.9561	31.7186	33.2794	38.9048	23.9314	23.0414	39.8308	39.7657	101.778	88.4214	94.6691	107.903	111.252	121.985
NM_001000921	11.4589	18.2125	15.278	16.2859	11.8856	16.2061	14.7177	14.8531	13.6643	15.9342	17.8526	49.2477	62.1719	43.9188	50.4801	53.5369	73.1985
NM_001000922	29.3528	49.1968	36.7816	34.4236	25.4647	20.3174	28.3903	39.5473	30.9349	35.6288	26.7376	148.502	180.441	196.65	133.613	221.263	84.72
NM_001000923	19.1766	35.645	25.9432	20.8489	23.0147	18.2469	17.8604	16.517	17.7671	25.9692	24.7986	64.4241	114.766	97.056	63.0747	69.237	86.5231
NM_001000924	14.8147	20.812	16.28	17.4569	16.1654	19.0644	15.2239	14.7514	13.4692	17.6428	15.7455	60.2907	72.6034	87.1817	73.1658	53.4699	102.825
NM_001000925	18.3164	16.8211	18.6784	19.4518	14.4047	16.6984	18.7834	13.7971	22.1261	22.6875	21.484	65.1015	56.3288	58.3209	87.0552	60.1127	60.5651
NM_001000926	83.3275	194.543	143.439	149.795	115.281	114.765	107.186	97.7072	91.2031	120.27	90.7982	180.908	270.299	176.961	192.308	204.955	286.129
NM_001000927	31.1622	53.4339	33.5857	42.6759	28.7888	28.4452	25.6792	23.2918	37.4008	39.9518	42.3003	87.3773	139.994	71.1056	73.4471	68.1545	122.535
NM_001000928	21.7928	23.0808	20.6232	19.3311	24.5108	16.9759	22.795	19.0842	17.4593	18.1191	26.5137	69.8049	134.451	241.258	204.236	66.5009	75.678
NM_001000929	15.5198	23.5664	18.7308	15.8328	18.7779	15.3721	16.8309	18.0639	18.4064	16.5804	26.2554	68.3324	92.6983	320.747	125.134	65.5643	70.9682
NM_001000930	19.7008	18.4205	19.5807	20.052	16.7587	16.7199	16.4333	17.6903	18.9913	17.4746	25.1599	55.7442	49.8761	81.8831	101.855	53.2018	71.8128
NM_001000931	19.6616	33.9902	22.7803	25.5488	25.1985	23.7907	26.82	18.6424	15.9467	18.5974	22.9941	90.8396	133.18	146.094	161.678	96.0162	146.1
NM_001000932	10.5757	10.5431	12.6687	10.8115	12.9403	10.9231	11.041	11.3828	9.2051	10.7783	12.1842	59.2557	51.575	68.3183	59.2993	60.5228	46.5894
NM_001000933	53.3481	66.0964	56.1957	58.8733	52.8842	52.8842	73.9352	51.877	52.5277	66.5715	49.3328	64.5316	154.43	57.9841	66.6708	69.4878	156.317
NM_001000934	11.5572	25.2353	15.5131	18.3635	18.2892	15.9044	17.29	18.7005	19.1875	25.9707	28.0925	66.6746	99.4374	59.3142	61.039	72.559	134.079
NM_001000935	14.356	17.3637	21.6502	21.2977	16.8423	18.2879	16.622	22.2954	19.4106	16.9936	18.4733	118.277	164.013	102.924	107.105	111.437	115.626
NM_001000936	17.3101	23.2903	19.6301	19.2049	17.2258	19.1697	15.9868	18.9791	24.8948	26.7508	43.654	51.1246	72.2746	64.58	103.751	79.9328	83.0126
NM_001000937	25.2686	31.7621	28.7329	32.4755	29.6539	27.5387	24.8257	33.7863	25.8713	34.347	41.2038	119.064	124.198	115.215	143.281	81.4926	116.392
NM_001000938	17.7768	36.7334	25.3949	27.9729	19.1142	24.7018	23.6553	19.1679	17.2553	39.3446	47.9007	80.0218	101.402	88.4748	99.3773	90.6202	121.416
NM_001000940	13.1745	23.5261	18.801	31.6679	31.5685	30.9414	25.2513	31.8047	21.5374	54.0726	47.1876	94.4406	136.691	110.817	57.2535	79.9102	114.002
NM_001000941	18.3589	32.5011	19.4936	26.9938	23.2959	22.7464	19.1684	19.7126	20.1998	20.3121	24.7663	89.4002	99.4134	97.9686	94.4441	84.0328	157.416
NM_001000942	12.9035	28.5124	20.5592	13.2154	12.8506	14.5343	16.3718	14.1473	13.3204	17.8873	14.6957	70.955	99.1517	68.7683	77.4231	74.9479	94
NM_001000943	35.1111	62.3177	41.465	45.5446	47.1816	44.6626	39.5055	38.3144	33.6306	40.9446	34.2467	124.349	110.677	152.341	135.331	121.995	177.483
NM_001000944	93.2418	122.222	136.135	110.526	133.52	120.629	138.835	93.3633	111.035	149.528	105.375	320.674	475.811	311.237	351.022	369.699	535.091
NM_001000945	13.5273	18.5199	19.1335	18.5434	17.3514	16.5146	17.1225	17.961	16.7138	20.6291	21.3273	65.4362	84.6213	78.0136	105.164	54.8425	170.815
NM_001000946	16.3445	17.0611	13.8905	19.5989	17.273	14.9825	17.425	20.2253	17.8625	19.5749	15.5804	66.9817	65.0707	75.2041	79.821	65.9465	70.4044
NM_001000947	29.7723	58.2278	35.1777	34.9044	22.0814	43.8352	25.6401	31.6485	27.8712	37.6008	20.0099	125.652	192.628	106.797	109.911	115.184	182.553
NM_001000948	13.5393	21.3022	17.6313	20.5633	17.614	19.7537	19.0347	16.4618	16.367	16.4864	15.0153	93.9257	85.3776	81.7134	104.265	80.2785	98.6084
NM_001000949	10.7511	11.3061	11.3943	10.9828	10.7514	14.7468	10.1195	12.7824	11.5549	10.5084	14.7855	63.9792	49.2964	64.5616	62.9817	54.25	48.786
NM_001000950	48.412	145.353	62.3077	58.8818	39.0777	29.7537	37.0489	47.1537	36.3359	80.7265	71.0258	129.407	144.723	119.052	108.285	119.422	177.154
NM_001000951	33.6498	75.102	38.0987	38.0682	28.0074	33.6843	26.5099	29.1396	25.3952	46.3235	56.8154	116.199	88.2278	107.562	84.1516	97.166	103.492
NM_001000952	15.9469	27.8106	22.2874	16.1436	18.4387	18.0288	18.8161	18.3878	12.28	23.2614	25.9421	70.1715	119.813	71.2582	78.9366	50.8534	85.6071
NM_001000953	129.294	282.7	172.024	122.399	137.083	126.946	148.807	103.878	96.605	140.563	87.5968	279.455	402.49	278.18	240.533	179.401	327.577
NM_001000954	16.2416	17.1552	15.9778	14.3382	15.6555	13.9666	17.2488	17.5315	18.8141	20.0843	15.6039	198.261	225.526	333.738	252.368	211.665	231.55
NM_001000955	22.0243	56.1323	38.2059	31.0932	74.8639	67.4052	76.9291	58.7854	56.6167	75.6832	39.7316	89.9167	130.184	88.2991	80.0828	111.203	198.244
NM_001000956	22.2926	90.0006	65.6124	41.9284	58.9212	60.4355	76.5106	60.9612	35.442	89.7976	58.4284	134.922	228.757	90.5601	85.4243	92.2644	218.724
NM_001000957	173.737	712.404	325.724	294.286	101.734	105.9	112.115	224.061	202.301	353.547	238.794	549.039	903.914	477.805	471.964	551.696	1092.44
NM_001000958	44.934	93.135	72.1145	75.7879	70.0082	69.6214	71.8686	62.2446	59.8041	54.5128	52.3542	258.295	325.769	328.156	309.614	302.727	393.227
NM_001000959	19.3773	44.761	25.2679	17.7768	27.5713	20.9764	25.2352	25.5986	19.6813	26.6875	26.1526	102.675	83.5414	75.5115	65.5749	80.3118	88.419
NM_001000960	18.028	41.5927	22.2729	25.1432	19.1102	19.2066	19.7128	18.2154	18.9132	22.1826	21.3689	83.6173	108.673	135.834	112.106	83.5052	113.7
NM_001000961	17.028	24.2051	16.0249	18.8722	17.7639	16.7564	18.7447	16.8686	14.6789	16.2281	16.8904	54.0906	70.2414	54.647	62.1673	80.1907	65.0316
NM_001000962	14.2682	17.6745	13.3597	22.3254	16.6475	14.4716	19.7835	15.4291	24.983	18.9126	23.1103	84.6059	129.79	151.791	99.4418	133.592	128.129
NM_001000963	24.6168	47.1552	27.3666	22.614	39.9382	35.7256	27.8403	22.534	27.3464	23.3029	26.7383	201.102	325.718	185.892	259.26	226.494	192.903
NM_001000964	22.4716	26.1476	17.6092	20.8356	17.5244	16.537	21.0337	12.0584	17.1038	21.1118	29.2158	58.264	64.9386	58.9054	63.1326	63.7623	50.5309
NM_001000965	18.0367	16.5306	15.5305	16.9386	15.8592	18.437	14.8795	17.1591	15.7109	18.6793	16.5581	100.386	111.965	138.642	171.272	81.7465	80.1887
NM_001000966	28.0198	39.5072	36.6135	36.3743	23.0996	21.8485	21.0015	27.7125	21.6705	27.2042	31.8422	80.9045	83.8277	74.0372	89.6213	83.721	75.8848
NM_001000968	14.1192	22.544	19.214	19.1416	22.0266	23.8246	18.6898	20.6572	14.9171	20.6885	24.5411	65.7598	66.0398	88.5517	69.6453	56.7729	80.2493
NM_001000969	19.908	29.2979	20.795	25.8181	20.4745	21.2694	14.707	21.7318	24.845	33.1608	33.7874	56.4133	70.0125	59.1675	51.2323	44.0357	50.4002
NM_001000970	21.3885	28.7784	22.2981	15.8921	18.1689	24.306	19.1076	18.3088	19.4276	24.9325	32.2176	136.8	120.651	195.999	65.4079	58.4075	110.344
NM_001000971	14.5366	19.482	16.0135	16.7587	18.6387	20.5325	19.7371	14.0875	16.4634	24.4745	17.5384	57.4489	50.4018	49.6957	48.3023	58.0013	58.8008
NM_001000973	20.5225	32.6544	23.7993	22.5416	24.5463	20.5933	26.629	19.7732	17.8865	30.5018	23.0922	122.063	245.65	111.1	139.546	93.4276	144.954
NM_001000974	12.7728	34.1072	19.0581	20.9919	29.7837	34.817	43.9096	54.8617	23.0305	53.7626	37.514	133.422	160.689	219.995	122.849	125.833	194.245
NM_001000975	15.9424	19.8841	15.7069	16.2082	18.036	15.1774	15.672	14.0163	11.8221	16.5147	17.699	71.4843	121.827	82.8273	82.712	71.0812	79.7961
NM_001000976	22.2454	35.7177	23.1232	26.1625	37.261	41.9755	30.2092	30.3036	33.8274	43.8944	28.9385	89.8096	154.812	144.117	300.884	99.556	206.236
NM_001000977	17.4734	22.7341	18.9385	22.9611	20.4809	19.1377	15.2113	18.0193	16.9576	22.803	20.7716	85.7464	70.7145	102.708	139.969	141.37	129.836
NM_001000978	15.1936	20.7948	15.5496	14.7096	18.4391	16.2707	14.7177	16.8035	23.4043	21.7364	20.3544	68.9581	129.191	62.5406	77.5599	115.06	80.0964
NM_001000979	16.6301	31.2103	27.9573	25.6032	21.0717	16.8832	19.3532	21.5678	26.6068	23.667	23.8257	191.089	126.298	169.728	150.551	134.971	260.87
NM_001000980	43.6587	85.7878	56.0423	58.5606	53.675	43.5908	52.9772	47.6866	37.5662	41.9393	49.6386	127.098	180.345	130.92	148.296	140.515	175.429
NM_001000981	15.703	48.0044	22.0978	21.5724	20.939	18.0847	15.8025	14.8145	16.4129	23.7212	22.368	118.606	204.404	85.6336	122.176	75.1556	283.329
NM_001000982	18.729	27.2917	20.4952	18.9101	25.695	31.7293	19.2942	21.8731	33.9467	25.7915	32.214	52.7842	74.3929	67.9094	67.1755	76.2335	93.1352
NM_001000983	14.4975	13.7871	12.5387	16.4515	23.0454	18.2862	13.6609	17.75	18.3148	16.4783	22.2092	80.07	66.3561	56.2948	57.881	83.0352	96.8734
NM_001000984	19.809	26.2953	21.8312	16.703	18.1719	15.8208	18.7652	18.0009	19.2007	20.3571	23.4998	87.9505	76.4059	111.999	79.5263	115.446	88.419
NM_001000985	25.6401	20.9906	18.5961	16.7772	32.7512	27.6885	24.4484	22.6946	35.6306	26.8884	36.8169	86.0676	96.6885	69.3168	101.089	74.8603	114.243
NM_001000986	18.9149	26.2628	19.0073	26.5081	22.6125	27.7832	21.8212	18.573	16.2998	17.6135	24.7746	84.4445	177.616	129.961	88.0719	95.5258	74.9928
NM_001000987	10.7619	13.6025	14.8018	11.8237	9.8257	11.5924	10.9847	13.0596	12.3513	14.5403	15.5401	60.7898	76.6242	52.8139	70.3186	45.7268	52.5835
NM_001000988	14.8021	21.1694	16.4064	16.8733	15.967	18.4339	19.0879	16.1753	13.7483	16.0227	19.9486	71.4828	49.951	56.2455	52.0323	50.3545	49.511
NM_001000991	29.0504	144.861	57.4219	67.5979	55.5975	48.3022	60.1929	47.5296	36.2428	98.1447	65.4523	128.845	232.111	126.565	118.206	136.647	296.819
NM_001000992	13.4933	19.4052	19.1062	13.5171	17.3912	14.4064	12.9184	14.0477	17.6386	18.4382	19.1172	63.9366	110.68	70.5892	49.214	55.2373	77.739
NM_001000993	30.5404	101.766	58.4821	42.4799	36.6003	26.4131	38.6887	31.3897	34.3041	42.2858	51.452	105.522	146.182	93.7885	76.4623	97.2345	168.296
NM_001000995	23.9566	46.09	26.8458	18.5506	16.0959	16.4912	16.6051	18.5371	34.801	37.7247	27.124	213.271	100.922	277.864	69.0416	143.252	166.512
NM_001000996	12.719	16.0952	17.8017	13.2394	14.3863	10.6833	12.5996	12.4195	12.7431	16.3587	19.6939	80.4506	74.8509	68.9655	109.059	91.2211	120.542
NM_001000997	17.106	41.6482	19.5549	17.6568	12.4299	20.2034	17.4975	17.275	16.2837	22.5819	28.2675	83.8872	162.373	121.113	85.2919	59.8172	90.3681
NM_001000998	21.786	29.369	35.5778	24.8812	17.373	22.6393	20.7529	15.9523	18.6998	27.8511	27.2848	97.0159	90.334	118.817	100.201	101.706	102.662
NM_001000999	21.5012	37.6277	34.3031	29.903	17.3095	18.6073	18.0733	21.1232	17.2118	25.5452	18.0782	72.1871	165.285	87.212	86.8234	65.3468	117.144
NM_001001000	9.6626	15.1542	13.7557	14.7371	17.1765	14.4614	14.1377	16.517	11.6265	18.8162	14.605	144.542	94.4238	88.7542	79.1565	63.8144	92.4587
NM_001001001	16.1912	18.1381	15.9319	13.7681	22.1559	18.6971	15.0141	15.9267	16.5802	18.0554	16.5115	55.9335	86.5586	105.119	46.5681	67.7277	52.922
NM_001001002	16.3117	36.8311	21.6887	16.3184	16.9541	12.3492	13.9405	17.1177	18.8677	20.7743	13.6998	70.3304	135.032	92.5179	69.142	86.2853	141.062
NM_001001003	13.4227	15.5066	15.7692	14.0268	11.9246	14.8091	13.2053	11.1044	11.2749	13.0205	11.8188	60.6232	54.3175	79.4432	47.443	55.4481	52.2054
NM_001001004	15.5793	16.9387	14.5318	18.2874	23.6273	15.6532	18.3167	20.3744	20.4118	18.4835	14.4579	232.003	173.613	172.696	230.381	159.689	386.453
NM_001001005	18.0863	19.0806	20.5996	24.8266	22.2764	21.4617	17.4966	17.8721	18.1997	20.8258	22.941	60.4183	57.7182	57.1178	44.2029	56.1156	59.2113
NM_001001006	30.9133	63.9974	45.7208	52.5218	39.3779	31.5622	36.6322	36.7421	41.3339	46.9716	35.7744	155.546	219.549	142.042	173.914	111.546	145.299
NM_001001007	27.8752	48.4138	37.2755	28.839	35.7232	37.1284	39.712	28.5782	22.4072	42.9934	41.6397	150.247	363.802	133.304	279.951	122.053	240.215
NM_001001008	14.1416	29.7929	22.3935	19.9864	21.3776	15.6422	20.6888	19.343	35.3861	22.9208	26.8492	71.1273	126.28	76.0363	81.4327	99.011	141.135
NM_001001009	17.497	15.3801	14.0928	14.3303	15.3133	20.6848	17.7817	14.8456	17.491	15.8364	21.1358	57.532	52.0364	87.1732	59.9018	49.7294	51.7355
NM_001001010	18.7401	43.0031	26.8848	30.3239	26.9886	25.4103	28.0789	22.2909	21.9705	23.9557	33.6144	67.8286	119.036	79.693	56.3622	137.404	120.827
NM_001001012	18.2448	34.3497	21.2052	25.785	20.4705	19.2201	21.2421	14.8022	15.775	24.2168	21.7107	78.3518	69.2692	62.6645	66.5456	54.5532	88.1615
NM_001001013	17.0842	23.1774	22.7826	22.8561	22.7506	17.0406	16.5309	23.8571	31.2087	26.1172	21.5488	52.5669	92.0647	158.874	77.3065	83.9185	95.4848
NM_001001014	31.8165	90.8994	51.7053	58.2781	40.3529	28.8647	38.5658	27.1319	36.594	55.9909	55.9872	74.5097	189.766	141.494	106.59	90.4352	158.009
NM_001001015	55.5115	146.019	73.891	56.7217	69.8889	71.4426	63.9644	54.1622	52.3143	81.6632	104	107.257	161.639	93.4654	124.11	91.6421	150.278
NM_001001016	27.2656	53.525	32.2403	44.327	22.1298	32.5316	31.2331	49.1495	33.9157	36.8984	32.7069	93.1987	189.787	79.7268	96.2112	79.5431	123.822
NM_001001017	33.9534	105.254	51.8152	46.1998	26.9168	22.4357	30.1831	32.4634	24.1627	64.0699	69.1485	84.1651	151.672	63.8773	71.5506	94.7554	133.214
NM_001001018	23.8615	27.0253	23.0849	21.1206	30.6743	26.6294	26.6165	28.9116	24.6962	29.6515	17.4281	95.879	89.3967	123.512	83.1018	94.5388	133.989
NM_001001019	69.9912	75.9385	88.8686	78.3077	56.8928	60.6062	69.4842	103.285	79.3079	114.866	81.8389	543.289	527.035	485.792	515.891	461.564	571.266
NM_001001020	42.4605	178.513	81.7007	82.0343	76.3319	49.1033	62.146	45.6977	43.3785	109.42	107.685	116.026	234.708	127.371	100.919	104.847	232.712
NM_001001021	21.5619	22.3724	17.3473	17.1119	15.1863	15.2187	17.2827	16.6708	14.9103	21.5234	24.1308	94.4952	95.6852	103.683	117.312	50.5784	127.894
NM_001001022	41.7775	87.3896	48.6065	62.8654	33.1877	43.823	34.4275	35.6594	41.3351	62.5934	70.6316	156.26	156.384	127.197	93.4566	116.144	237.914
NM_001001023	20.4429	47.5448	31.509	22.6403	22.5526	26.1847	25.0543	32.9616	20.6156	33.842	29.2566	77.609	150.173	95.7394	73.4068	84.2324	105.975
NM_001001024	31.0746	43.5582	41.9093	63.517	34.2321	52.9342	49.6432	35.6866	46.5806	45.8378	44.4159	317.311	612.839	374.484	396.093	236.349	483.906
NM_001001025	18.9083	33.5284	19.593	23.5558	18.6614	15.6982	15.1042	15.3407	18.9546	26.9235	22.4965	58.0676	68.3303	69.7775	77.0443	74.09	111.744
NM_001001026	15.5206	17.4063	14.129	16.5189	17.4837	13.2154	13.609	12.3427	13.7322	19.1934	16.2673	51.0142	84.2934	74.8096	53.2214	71.1075	78.4083
NM_001001027	19.0053	52.4078	30.3664	22.8328	21.3685	26.4013	27.6478	22.5456	13.9802	33.551	38.6539	71.4723	88.1007	65.0071	74.0031	100.596	103.976
NM_001001028	15.0104	24.1964	20.3461	26.6049	19.151	25.4939	17.0209	17.0966	15.5683	17.1843	16.2855	88.7378	91.1126	159.523	81.8657	103.038	132.923
NM_001001029	21.5053	32.7538	23.5156	21.6474	26.2199	26.9079	16.9857	18.0139	20.0947	25.5227	25.1535	58.0081	74.248	64.4633	91.3758	73.6706	86.1678
NM_001001030	26.8935	79.1934	55.1654	45.6031	43.0476	27.4577	28.9862	25.8592	23.9398	41.505	26.1526	127.782	204.431	97.5079	156.638	102.477	214.415
NM_001001031	21.4089	42.9414	25.5794	23.0903	25.877	22.304	19.0498	13.1957	22.7846	32.8205	26.4616	65.701	93.2079	89.6206	103.534	73.2723	89.931
NM_001001032	15.3491	21.7547	17.9381	21.7947	18.491	21.1155	17.2601	15.4009	19.1858	23.658	23.6695	116.776	160.731	110.69	96.0762	225.954	105.892
NM_001001033	20.6778	34.4155	31.4403	31.6581	31.7186	21.8699	27.4828	24.3119	20.5132	33.1174	22.4962	208.586	281.06	196.576	142.505	200.651	340.041
NM_001001034	31.3844	71.8508	47.0887	38.2506	45.4031	40.6718	34.5515	33.5227	21.9806	38.568	41.0507	68.1466	137.488	74.5489	59.6537	120.068	157.251
NM_001001035	23.1004	63.8597	37.3948	28.0113	35.1449	42.325	35.2491	27.052	24.1007	41.6754	57.6547	96.6317	492.912	170.344	74.4382	169.508	159.498
NM_001001037	41.0018	56.8206	46.1011	51.0894	39.8111	26.7607	44.2421	35.7038	41.5845	58.2697	54.431	279.212	256.13	283.466	146.436	106.423	168.849
NM_001001038	18.9631	41.9281	21.5415	25.0236	29.8543	21.9473	18.3332	24.2772	24.3142	21.9745	29.314	115.179	126.211	122.232	81.1801	69.4471	89.7843
NM_001001039	73.894	116.2	89.1786	95.133	113.498	124.213	117.369	60.5505	78.716	75.8586	72.4269	139.934	182.192	149.266	145.892	201.451	220.97
NM_001001040	20.6278	37.1955	23.2896	23.2081	18.0264	19.8029	17.9319	20.9428	17.6345	22.7781	22.558	72.5929	98.3247	64.9048	52.4345	59.4966	86.266
NM_001001041	17.8407	36.1755	23.742	37.1535	27.0291	18.3152	26.2865	17.1916	38.5705	35.0308	31.9114	77.4192	157.79	77.9759	101.244	84.0448	158.754
NM_001001042	13.6719	14.9869	14.6981	13.5077	12.0038	12.7749	13.4631	16.3796	12.436	15.5796	16.9033	97.2952	116.84	107.124	70.5362	57.1974	80.6056
NM_001001043	16.5501	24.0657	14.8345	22.39	17.4963	16.9256	14.8597	14.0085	18.2198	16.2686	15.9752	51.8571	73.9928	69.1136	57.9529	47.8205	58.3662
NM_001001045	19.3356	28.8191	20.9387	23.4668	17.7769	15.0381	17.9758	13.8121	13.8766	20.7742	20.1952	50.9258	54.9725	51.4711	52.9289	59.1728	56.3151
NM_001001046	13.809	14.8763	12.4042	13.7213	12.7774	12.9272	15.0868	13.5302	12.3807	17.213	16.3847	43.7168	50.4719	49.8968	49.6397	50.854	50.0467
NM_001001047	34.8468	45.09	40.9836	31.1943	61.9231	75.9714	61.156	41.2369	39.4854	66.9404	52.8517	84.0264	102.464	96.2539	85.8094	71.5377	113.396
NM_001001048	16.8498	25.9282	18.8351	19.433	28.3599	36.6806	32.0133	19.223	18.9925	22.7101	31.4974	61.7227	79.2971	89.682	85.3526	78.8434	70.4334
NM_001001049	11.432	20.2092	14.3347	13.9597	13.827	12.5328	15.71	13.5385	12.3042	16.8209	16.5852	63.3892	84.4833	72.9074	67.0681	54.6951	71.437
NM_001001050	21.2496	35.7748	32.2378	31.4745	31.6844	31.3463	30.1319	23.5328	22.8067	37.3779	25.8092	59.6562	89.2058	72.4314	95.7507	53.6275	73.4002
NM_001001051	24.8814	42.209	23.8599	30.5549	20.5981	17.378	19.5343	22.4247	24.885	39.0223	36.7501	75.6605	74.4065	80.6459	87.334	54.859	90.335
NM_001001052	88.0921	115.001	131.846	131.726	113.402	75.5385	98.7432	103.595	91.1501	99.0234	101.797	279.352	440.641	306.836	412.713	286.735	371.218
NM_001001053	21.2718	28.4977	22.7858	22.8102	20.9785	24.3482	23.0644	19.5683	19.056	22.6685	30.4395	102.958	121.508	171.288	111.109	113.11	85.6051
NM_001001054	21.693	69.3459	39.9886	28.0825	34.4082	20.8879	20.7925	27.333	22.9398	62.0243	42.9708	68.5159	128.719	52.1451	66.196	79.383	123.918
NM_001001055	26.3825	48.5612	34.6186	32.1232	17.6805	18.2021	19.9908	25.5433	20.3695	34.4029	20.4758	136.07	89.9537	94.9129	72.6634	62.0136	98.4239
NM_001001056	12.481	17.7537	15.366	15.4425	13.8637	16.9006	14.5335	18.0153	14.0393	12.8758	15.4452	58.1673	54.188	71.5446	59.1701	56.7486	56.2445
NM_001001058	16.1728	20.4969	19.3726	14.6379	14.8178	15.4667	14.0301	16.4761	14.7054	19.3399	16.1722	70.7791	74.5517	52.7817	53.5316	59.6035	90.5546
NM_001001059	21.6434	55.6843	31.1194	33.5844	37.5018	36.0122	36.8924	32.6986	30.7628	40.1094	46.4558	147.157	166.594	139.219	137.556	130.067	122.192
NM_001001060	29.8012	30.631	38.8054	30.8109	33.2667	32.8118	32.1966	45.3591	34.8382	33.4394	42.3325	67.9239	329.309	147.389	182.843	110.102	310.331
NM_001001061	22.9535	31.1463	43.0944	26.7134	29.1456	24.8321	36.7393	30.0001	25.1933	42.7503	32.1917	121.879	226.781	147.404	93.3541	118.501	274.207
NM_001001062	14.0779	16.7368	14.3231	17.0969	12.5216	17.2934	14.6119	14.3766	18.5344	15.507	17.2397	57.7135	52.551	66.1737	125.827	57.2849	69.901
NM_001001063	14.11	22.3703	18.1823	13.6772	14.11	17.8985	17.6106	15.6779	14.0111	15.6107	20.2512	57.5131	80.1563	85.7101	55.5868	76.0053	82.6783
NM_001001064	44.0955	120.116	58.1157	55.1295	42.8245	35.39	46.7493	46.9477	35.7552	58.6469	83.6155	85.7791	84.963	94.8399	130.034	66.3818	93.6866
NM_001001065	23.0616	51.8068	29.4723	32.576	24.9369	21.7603	27.2318	25.2651	26.2948	42.0068	36.1093	88.8901	128.423	90.0204	81.6279	73.7667	95.1047
NM_001001066	12.3703	13.4881	14.6562	12.4007	12.5428	13.8193	15.8861	14.3205	13.1642	15.4259	12.9581	61.0449	67.3873	55.9178	63.7493	56.2165	92.7026
NM_001001067	15.433	26.8589	20.666	15.899	16.4952	16.8851	15.3381	15.9531	12.1923	20.0391	20.1834	57.8346	72.2004	53.7797	65.0966	67.6223	171.018
NM_001001068	10.3093	13.1093	13.5987	11.1079	12.1557	11.7873	13.0502	16.002	12.6697	15.8002	16.5732	61.0009	43.2296	48.9417	82.9961	41.4123	44.1728
NM_001001069	33.6567	104.781	55.5712	48.7188	42.913	34.9395	37.7286	32.3321	26.7277	65.5027	76.2231	91.7961	141.066	78.3118	80.9179	74.0829	144.642
NM_001001071	51.2337	140.487	83.4633	67.6945	43.009	39.2673	43.3156	43.4537	34.8336	66.7032	45.0994	132.628	167.564	112.593	69.9129	82.0963	271.355
NM_001001073	51.5584	68.0845	41.1529	99.3464	83.96	68.0623	72.5436	52.5701	74.5487	87.8567	84.6218	161.3	183.919	128.37	317.921	151.751	227.518
NM_001001074	25.4987	44.2943	27.6898	35.4887	37.5944	21.0882	33.8524	18.9612	25.4954	57.092	70.2385	82.5032	78.4316	66.5269	60.5832	60.9785	113.402
NM_001001075	25.0367	27.4484	29.4355	37.7571	24.1452	20.408	26.897	28.1374	26.1432	34.6721	32.6218	221.934	177.171	127.537	124.751	125.241	244.725
NM_001001076	18.6935	18.2801	20.7013	20.1594	27.4922	22.4395	18.2542	18.277	18.805	19.8452	31.1936	69.2011	80.8197	55.3301	106.69	75.5923	69.424
NM_001001077	25.3363	39.1826	30.2836	33.0197	37.638	31.4581	39.1863	27.2465	29.7051	50.5251	45.256	76.2931	85.3202	80.0645	93.0286	83.4723	87.0996
NM_001001078	14.3254	19.5224	20.6222	17.3155	20.9686	21.3867	19.6038	15.4608	20.2408	20.4463	18.4188	79.411	119.859	83.409	74.7065	85.6092	157.367
NM_001001079	14.9083	18.4692	15.5549	18.8752	15.905	18.5063	17.8608	15.0746	18.6277	18.7381	18.5825	54.8331	50.1776	57.4584	72.0344	63.0437	85.8189
NM_001001080	11.7145	13.2806	14.0059	14.9184	13.0281	14.7341	14.7174	14.4524	13.9518	14.0366	14.1866	128.641	136.248	157.326	100.814	104.443	141.762
NM_001001081	19.9754	49.1974	33.1534	28.2539	21.0246	24.0854	17.3161	16.5813	17.3901	27.8763	37.8037	110.549	86.7952	95.0354	79.4758	125.869	161.974
NM_001001082	20.5647	21.2227	20.597	25.196	32.0021	26.2625	34.9389	27.4456	19.5341	29.4593	20.1774	91.3913	100.52	177.412	94.0676	82.647	115.243
NM_001001083	11.172	20.9571	13.0753	14.1797	13.6876	15.8378	12.8521	14.8993	13.4764	17.9014	16.2736	47.6297	58.4728	53.2183	173.976	46.133	58.1877
NM_001001084	52.6719	104.745	75.4227	67.4413	69.7272	69.4455	57.383	61.1301	47.9675	89.6915	62.8716	216.81	320.853	194.825	252.692	132.986	222.569
NM_001001085	30.4124	39.546	30.1946	25.3168	29.5043	28.8058	30.3974	31.1034	28.7899	38.2965	27.0161	139.918	219.125	92.7176	199.922	100.061	220.693
NM_001001086	33.0287	41.174	30.4804	32.2931	27.2759	33.4545	38.3883	26.6202	24.9503	34.0496	32.4722	103.493	94.8457	133.085	79.0781	82.0373	85.8584
NM_001001087	30.6238	88.6288	40.6632	41.6653	33.2277	26.5632	32.4616	41.9824	26.4111	53.239	53.4383	71.5198	120.256	95.7163	61.017	100.486	143.569
NM_001001088	18.0136	20.5425	20.2771	16.1158	22.3353	18.5946	22.6807	28.9186	22.7861	22.685	20.779	77.6523	65.8489	81.6648	96.0691	57.7778	82.6292
NM_001001089	30.3959	31.7216	24.8196	25.2085	22.7734	38.0319	36.008	24.1124	24.789	28.894	29.5093	63.1878	90.714	59.5493	71.6629	61.5517	74.6121
NM_001001090	17.6365	30.7289	24.0166	27.8945	22.675	18.8054	22.2593	14.7746	19.5498	31.3553	23.4037	156.919	185.157	139.446	122.721	118.258	210.473
NM_001001091	163.219	345.714	310.33	306.281	313.048	286.863	328.541	349.529	282.065	266.978	212.364	1021.49	1474.7	962.945	1232.69	797.66	1364.01
NM_001001092	85.1224	319.853	150.584	134.913	107.07	135.458	100.735	117.161	110.588	224.419	171.867	425.807	580.628	301.862	239.491	335.697	613.992
NM_001001093	30.5168	46.5315	35.4365	48.6371	27.9109	17.0177	24.5038	44.0023	22.1216	40.8824	29.2032	61.095	83.119	95.4091	84.8086	84.3191	116.992
NM_001001094	43.4544	46.4597	44.4734	34.9113	41.6625	41.8813	37.5283	43.5521	45.2615	51.7283	31.3045	235.916	203.561	173.772	108.926	206.462	230.695
NM_001001095	43.1484	177.793	77.7857	54.6928	78.2469	82.3735	73.4958	70.9417	68.8655	140.851	89.8582	159.861	256.94	168.186	144.687	133.749	339.341
NM_001001096	50.993	183.002	81.6844	56.5194	77.0699	73.0542	83.3843	69.4616	47.7563	100.459	60.628	207.525	327.377	184.893	204.198	242.178	357.052
NM_001001097	194.512	371.778	341.489	292.387	426.923	698.582	511.152	499.754	786.225	517.328	583.85	1465.25	785.64	3792.53	1729.73	1829.65	1497.99
NM_001001098	68.1914	295.146	139.206	115.781	125.06	113.543	80.3418	82.1191	117.115	180.929	121.062	159.085	248.875	191.705	157.927	135.42	361.259
NM_001001099	39.9496	37.0678	40.919	31.37	65.3238	56.2113	46.5883	61.664	34.9889	33.9243	30.9997	78.4559	102.456	65.5717	84.7032	63.1702	70.669
NM_001001100	17.7591	18.2795	21.0144	23.0438	17.758	16.6695	22.0881	21.9445	15.9602	19.0901	24.7763	61.9995	82.1263	129.433	88.4541	102.696	70.6462
NM_001001101	16.4162	30.7145	16.0461	20.8606	14.3576	16.7236	14.0211	14.9514	14.2009	14.7863	19.4319	57.3908	62.0352	57.7563	65.9161	52.4825	75.8716
NM_001001102	54.7895	115.297	96.7519	96.4474	105.654	65.5827	84.0757	90.9734	56.7592	109.702	90.3217	155.763	280.244	221.483	159.346	148.999	375.877
NM_001001103	54.9267	150.86	72.9342	76.0599	79.3175	56.2591	54.9235	62.5985	70.7755	75.9965	95.5921	144.146	232.423	135.537	195.678	129.408	210.476
NM_001001104	32.04	89.8624	56.38	54.9427	47.5145	41.0463	38.1734	39.6013	53.3294	81.3823	77.592	137.126	106.484	105.829	99.1901	87.7242	160.091
NM_001001105	21.762	59.2844	40.8672	34.3586	42.248	43.0325	52.4198	41.0708	35.5204	56.2376	58.3467	101.846	232.736	149.478	81.8019	175.435	140.362
NM_001001106	20.0986	42.1433	29.5556	24.2065	35.4932	40.1347	36.8859	32.9179	23.857	34.3129	61.1979	121.767	111.852	85.7398	74.794	168.61	126.674
NM_001001107	15.11	17.8151	16.7963	16.2437	24.2396	18.7518	16.5703	18.165	20.2802	23.1971	27.1371	53.8549	77.6474	93.5527	56.822	58.5523	60.0118
NM_001001108	41.7336	71.2435	54.5044	61.0209	22.5382	26.2918	33.46	53.0553	23.8055	59.4811	33.3891	108.168	246.721	131.539	106.873	176.558	171.272
NM_001001109	11.9167	14.6605	13.4962	11.8147	11.1702	9.8336	10.4684	11.5593	12.1065	11.0222	14.9345	46.3826	64.6658	71.7007	55.1254	48.2012	63.5665
NM_001001110	20.2384	27.1767	22.1435	31.5923	27.7672	19.7973	25.7166	31.0611	25.4758	38.3756	33.8978	80.1511	91.541	67.7148	253.638	96.6291	103.934
NM_001001111	57.463	170.281	85.3189	85.2409	114.558	77.7206	104.799	70.9196	67.6513	109.125	103.126	227.218	399.902	200.814	136.812	215.937	286.205
NM_001001112	67.4706	150.99	93.7785	86.9122	86.6717	77.2123	109.757	64.7585	77.9063	85.4616	95.5592	259.492	532.618	287.321	489.651	267.61	724.583
NM_001001113	75.3107	385.699	134.579	109.557	171.791	140.696	160.436	124.43	134.816	203.929	144.921	401.19	699.906	323.705	301.261	367.703	740.166
NM_001001114	43.7914	54.3341	102.174	64.5236	101.421	77.4321	100.819	56.1623	57.6133	77.5527	31.8342	330.664	418.506	246.741	228.398	185.029	551.78
NM_001001115	102.286	331.317	150.218	169.426	140.572	120.136	136.411	118.903	108.441	174.492	166.667	493.515	1092.08	537.474	264.464	328.346	658.033
NM_001001116	156.221	196.206	192.174	160.365	202.414	199.78	164.067	136.716	128.693	168.922	145.232	328.026	507.885	352.703	395.835	326.192	511.318
NM_001001117	33.4812	36.4265	41.5114	32.2076	37.698	39.7992	35.0545	29.225	29.9467	42.1309	27.1618	105.807	179.261	139.59	120.507	103.038	147.421
NM_001001119	18.8001	27.6708	20.625	20.7674	26.9788	23.222	27.2902	17.388	17.3867	29.2907	31.7082	65.5268	127.567	79.6524	70.3322	82.3968	111.581
NM_001001120	29.8137	102.528	44.256	42.0849	46.621	34.7964	34.0742	32.7339	31.2213	75.7941	35.2876	147.343	199.055	131.832	137.591	152.162	250.89
NM_001001121	243.728	616.363	453.414	391.877	423.132	413.993	448.277	367.981	288.171	332.468	190.295	993.627	1343.7	793.537	771.348	834.872	1302.51
NM_001001122	27.2013	40.9638	31.7912	28.6876	31.8539	37.2129	29.4114	28.7486	31.459	57.0846	47.7322	75.6318	82.0443	86.6971	76.6417	78.581	106.091
NM_001001123	18.8684	30.7234	25.2455	18.6312	14.9193	16.301	15.6718	17.4091	17.5294	18.8626	26.357	51.8375	65.4185	50.0979	71.6778	45.548	65.966
NM_001001124	15.3064	22.7401	21.0868	22.4482	26.225	17.8078	27.7709	19.306	20.1235	22.3518	22.2392	57.5452	59.315	127.063	51.9979	85.9959	77.8141
NM_001001125	77.8588	151.161	97.8594	108.384	93.7752	95.741	88.6999	72.6283	58.2192	100.079	86.7409	153.465	227.065	156.125	130.776	156.705	264.936
NM_001001126	32.1133	81.6626	58.4165	37.4461	36.9829	34.3634	30.1591	40.8336	26.5612	46.6204	49.6999	109.697	182.493	95.9702	75.7434	82.8947	238.321
NM_001001269	25.5167	90.1303	37.1749	41.4102	38.5389	36.9989	47.4146	50.6227	28.058	57.1966	39.7681	187.91	144.365	88.6647	120.237	121.942	173.768
NM_001001270	13.633	16.2219	14.6396	16.5785	14.1305	22.6553	18.1636	20.7719	17.7246	14.5261	23.3212	102.089	73.6117	75.5997	86.9001	62.4678	69.3459
NM_001001271	30.1867	65.9818	31.6604	35.8996	21.5188	17.0177	23.4043	24.6608	22.5367	44.6547	41.1638	68.3217	112.297	160.829	76.1027	80.4616	109.595
NM_001001272	37.0474	54.5264	41.5907	44.7798	45.4009	41.907	46.0163	33.8995	30.7859	59.0812	43.0738	82.9945	158.298	178.77	121.874	198.396	214.689
NM_001001273	25.5108	37.0193	25.0694	20.3639	21.7426	21.81	19.5387	21.0625	16.2957	38.8857	27.4489	54.0645	71.4288	74.1952	56.7834	77.3729	72.0571
NM_001001274	35.844	37.7042	30.5476	37.3573	43.2673	45.8759	45.8649	39.1167	43.2619	32.5005	63.2802	100.022	106.421	107.766	100.769	104.773	120.661
NM_001001275	100.831	122.832	123.886	134.899	248.204	122.856	151.234	125.988	103.385	131.662	104.433	446.671	478.6	395.692	387.499	419.101	570.139
NM_001001276	20.2063	25.0078	20.6854	26.3792	25.9802	22.2881	19.3604	21.1121	20.6985	27.3854	26.8012	220.206	128.441	312.56	129.575	151.137	149.915
NM_001001277	12.2149	25.2767	17.8139	18.1763	20.5445	20.3726	19.0086	14.1912	23.1298	24.1346	20.9401	57.0722	86.8991	334.666	99.7485	74.1111	97.1165
NM_001001278	37.4066	129.628	57.9161	67.9449	59.634	62.8504	84.6064	52.8524	67.2687	84.9671	70.1623	205.578	231.937	202.6	206.933	156.081	321.173
NM_001001279	44.385	119.051	72.1064	59.6138	77.7333	87.4451	68.7786	52.0677	41.2292	102.126	80.6874	103.671	210.679	95.265	115.972	91.027	253.443
NM_001001280	15.0073	26.5293	17.4522	16.4734	17.7764	15.3585	12.3471	15.6297	15.9044	23.3444	16.8876	102.549	87.2818	74.586	61.5736	65.0647	97.678
NM_001001281	11.713	32.5772	22.3717	17.2349	15.9509	15.0536	14.4297	11.688	11.4665	16.8518	20.0159	108.495	93.0802	71.1426	65.6855	63.7278	87.7299
NM_001001282	17.2103	24.1184	17.9603	21.0311	20.4552	18.4002	17.3418	19.3811	18.5992	19.6711	20.0247	201.256	164.095	176.124	176.067	167.187	173.572
NM_001001283	21.3771	32.3462	32.8548	30.9932	36.1165	29.4662	27.6427	22.3488	26.0657	27.7261	31.6709	97.2775	149.609	101.015	137.714	81.6252	151.919
NM_001001284	15.3701	18.4644	18.4416	17.9872	13.9067	17.4146	11.4141	15.6005	15.0076	16.5497	16.6443	69.1579	74.071	57.3264	58.1877	65.4329	71.5397
NM_001001285	45.268	71.1949	66.7227	59.4565	30.0178	30.8478	35.3112	57.8603	58.0543	44.0767	52.5764	160.268	156.322	132.175	171.329	139.128	200.672
NM_001001286	44.186	121.885	51.9663	62.4321	45.0631	45.4746	52.8553	48.8255	50.7116	84.5586	92.7754	186.079	232.521	192.983	150.746	147.216	238.231
NM_001001287	20.0602	39.0941	42.4976	36.1066	33.4669	29.3982	28.059	41.4365	25.3993	55.5699	34.6803	74.0222	159.326	107.655	103.448	66.1298	99.322
NM_001001288	31.0611	49.9212	25.3133	27.7743	28.4015	28.112	29.4593	25.642	25.9933	36.6171	29.0872	146.294	211.627	172.454	129.507	121.478	170.523
NM_001001289	54.8976	82.9681	78.4537	81.3375	46.1507	43.7651	55.9561	60.2582	65.5712	77.5212	45.126	167.371	257.199	210.728	174.749	158.289	297.368
NM_001001350	122.313	261.631	169.262	201.832	133.608	133.906	125.229	121.898	149.636	152.661	113.154	155.774	325.967	184.138	294.346	183.745	301.443
NM_001001351	19.0777	22.7805	21.2055	18.6278	17.4047	18.2599	19.5094	18.7975	18.4377	19.0785	23.534	56.9953	61.285	51.4955	42.4809	53.9331	72.3147
NM_001001353	11.9681	16.613	13.3459	14.2701	15.6121	11.629	11.5743	11.7873	14.9264	13.8545	13.6761	47.7168	55.6281	79.4452	60.6581	59.5355	75.5366
NM_001001354	87.5514	352.683	128.135	209.961	125.189	123.726	130.32	86.0638	117.33	262.376	214.778	283.992	433.407	224.324	249.746	252.944	674.86
NM_001001355	55.1311	69.8119	53.4593	50.8252	52.0261	34.4978	44.5782	64.1088	46.6341	99.6581	76.5367	241.85	281.581	189.556	152.673	257.453	352.09
NM_001001356	41.9422	89.3658	79.8492	54.7242	51.5349	46.1176	48.8127	38.1598	40.3059	74.6569	77.7294	101.235	126.566	128.303	161.206	115.898	166.365
NM_001001357	100.274	295.2	157.669	183.763	187.443	107.694	133.235	134.955	147.362	344.375	252.334	434.152	834.195	467.444	333.563	366.596	1026.67
NM_001001358	81.5024	284.959	128.106	149.212	119.381	119.236	116.046	90.2066	100.28	224.911	207.182	208.032	261.282	255.082	158.463	219.084	486.95
NM_001001361	18.5586	27.1912	21.392	21.939	21.0603	21.2657	17.3431	14.575	22.1999	25.2171	39.4712	70.6693	103.261	78.1348	59.433	59.0902	127.947
NM_001001362	13.0999	21.1002	14.9184	21.1148	13.3251	16.6334	18.6428	12.333	15.1393	15.9235	20.2906	67.8194	86.6501	74.3712	95.0336	69.5764	80.4014
NM_001001363	31.8967	88.1445	44.8339	74.5408	31.6934	26.7959	36.7852	36.8067	42.1834	80.3845	80.6477	140.695	162.651	211.563	113.458	127.365	313.304
NM_001001364	22.1556	60.0724	38.8458	41.2641	29.2902	22.7019	20.9059	26.3316	32.6164	62.9809	75.3514	76.2566	108.099	84.7071	91.5885	73.0678	235.071
NM_001001365	14.0739	25.1677	16.9455	18.0318	13.2907	10.8096	17.4457	10.4194	8.1547	16.5566	19.2671	61.158	64.1569	54.1903	53.2042	44.843	77.1942
NM_001001366	19.4135	34.7722	19.5807	27.3358	16.2996	18.9464	12.8224	20.6067	15.4303	26.0318	41.9406	84.9829	92.5855	64.2819	79.5337	66.7646	107.527
NM_001001367	25.3065	32.4512	33.0413	45.8469	31.6674	18.6086	25.5593	28.7768	28.1638	35.7544	36.855	132.192	164.218	112.974	160.691	108.597	180.921
NM_001001368	16.1141	20.6877	23.6772	24.0771	30.3357	14.2833	19.7406	17.2939	28.3107	31.7547	49.5942	86.4338	120.532	77.6138	65.7215	70.9287	83.3865
NM_001001369	21.1058	24.8186	19.2351	23.2531	23.0115	23.5216	23.4953	24.7796	22.2617	30.0927	28.0395	95.0272	120.378	97.1353	89.5245	92.9635	85.8374
NM_001001370	15.8905	29.8268	22.5269	32.0958	19.8887	22.8642	22.1997	20.2188	24.3848	46.6204	51.072	220.584	157.171	151.71	146.506	119.131	257.838
NM_001001371	99.5062	261.221	166.36	185.732	117.948	116.841	118.628	99.6395	130.674	152.165	172.069	355.168	493.608	569.071	270.545	369.158	942.535
NM_001001373	36.1619	58.9511	51.7196	59.0425	35.4325	43.2164	40.3455	33.1996	44.6227	47.7272	53.0609	283.111	208.88	113.11	157.059	147.002	280.176
NM_001001374	25.157	39.2665	29.7164	28.5215	24.0952	27.7244	26.23	33.45	22.5574	25.1675	50.6001	183.284	121.733	106.636	99.0526	159.562	110.051
NM_001001375	16.5036	23.6393	19.3686	22.2835	17.4023	16.1094	16.5499	18.0286	17.9222	20.7828	13.8375	49.3959	67.5554	55.531	71.3801	49.3664	77.4426
NM_001001376	14.4112	14.7242	14.3639	13.0779	11.9113	14.5873	13.5283	12.4797	12.254	15.3509	14.2631	61.5923	65.8998	81.4327	85.6655	54.1596	95.7856
NM_001001377	19.0854	22.4827	18.1775	20.1268	15.485	19.7026	23.6532	18.4458	15.6147	17.8841	21.6363	86.2579	115.043	69.6721	85.5059	67.2855	111.573
NM_001001378	93.4083	240.35	118.859	169.485	173.798	180.399	184.196	138.649	125.093	131.54	86.3662	419.477	387.448	338.608	299.629	269.408	484.694
NM_001001379	56.0035	145.861	115.032	171.201	112.172	149.334	121.344	100.331	112.597	112.502	76.442	267.298	357.928	269.898	235.728	227.381	361.89
NM_001001380	72.4562	268.462	106.254	104.063	94.016	96.9397	113.488	62.3959	64.6613	101.558	73.2277	408.797	594.622	366.213	294.426	405.637	565.295
NM_001001381	37.1493	100.105	59.644	73.6237	50.9108	55.2737	63.9819	53.7544	58.6778	105.576	91.2416	156.961	158.71	113.264	110.874	121.908	208.102
NM_001001382	26.2072	54.653	35.8627	39.9085	24.2491	29.434	34.0549	24.534	29.6205	31.3896	44.9008	91.9406	122.787	119.727	79.927	62.9394	155.332
NM_001001383	74.248	59.18	68.7125	75.8508	25.8985	30.0239	37.2736	65.3419	53.9917	83.0967	36.6277	158.673	151.237	81.0304	111.051	117.058	222.582
NM_001001384	215.94	322.905	259.159	259.376	338.74	199.14	224.12	212.529	222.197	213.842	174.188	746.61	967.879	1028.39	1047.47	744.744	753.315
NM_001001385	18.7061	29.2665	22.4571	34.2393	20.9526	19.8448	20.5357	22.4153	22.6038	24.8871	26.3352	88.2483	73.1465	83.4385	70.6493	64.243	98.4224
NM_001001386	32.7835	71.8295	41.6273	47.9212	43.2047	33.7925	34.257	80.9918	77.273	122.682	112.915	252.729	403.001	344.848	167.369	270.485	380.113
NM_001001387	18.4947	40.0364	30.9962	39.0569	18.8578	15.9602	18.5627	23.5948	27.8055	64.361	52.742	74.7436	79.4765	101.695	73.4588	80.2719	102.338
NM_001001388	167.269	609.42	305.037	248.644	283.496	239.015	237.362	202.191	177.446	340.974	309.788	520.021	898.566	567.992	417.385	584.746	1305.4
NM_001001397	14.3187	38.3069	22.1582	18.3591	14.4321	16.5226	14.7867	16.1883	15.7912	18.6927	20.8465	64.8635	101.502	80.4562	59.3591	375.31	102.766
NM_001001421	11.6417	17.555	13.4927	12.0907	17.901	11.8202	12.2639	14.0697	10.9365	13.9087	13.427	98.8978	57.149	64.9647	53.4673	78.4695	90.0933
NM_001001422	53.8361	128.298	79.5189	72.4255	55.7686	47.8449	54.6633	102.046	98.9299	115.812	79.2444	358.129	238.152	254.124	150.346	457.005	277.725
NM_001001423	51.3388	106.87	58.8156	41.0689	35.0956	29.3088	31.0088	36.2341	31.7556	49.6813	28.277	66.3739	157.534	87.46	105.379	115.434	177.864
NM_001001424	76.7781	229.974	77.2839	130.361	78.6854	97.1024	84.3597	88.2943	73.6265	99.15	80.8026	278.777	371.421	439.639	326.155	237.938	401.944
NM_001001425	49.5163	162.024	103.833	73.7146	64.6201	54.878	63.3039	69.0169	51.4988	102.598	56.0687	229.977	305.654	210.507	122.445	187.074	325.537
NM_001001426	22.3273	43.6712	34.4462	27.2854	23.5331	29.4441	33.4935	14.1912	17.4371	28.5145	29.3499	110.476	131.795	126.103	65.0104	105.71	116.522
NM_001001427	50.0398	66.0356	73.2245	72.2775	57.3653	65.6218	62.0658	45.7092	45.4371	32.5657	33.3744	136.835	220.072	142.226	162.295	119.808	202.871
NM_001001428	59.8392	141.906	68.8259	107.346	52.5113	157.367	54.7821	57.9845	76.8062	84.8185	48.1416	227.296	323.218	207.906	449.906	211.84	442.056
NM_001001429	48.7086	101.391	102.618	97.9301	104.487	96.506	103.591	81.5696	74.662	77.7896	47.0659	362.843	321.683	445.094	386.77	311.271	405.502
NM_001001504	6170.83	2522.6	4936.57	3545.77	3180.29	2948.41	2918.88	2882.9	2764.85	2476.61	3024.29	6735.09	9010.23	6219.21	7093.51	11546.5	5701.62
NM_001001505	18.2108	30.8751	24.2351	20.7368	16.3427	15.2298	17.4096	18.63	13.8116	21.7482	20.2598	47.6706	50.0281	55.3762	43.6652	66.5294	58.7006
NM_001001506	38.6541	69.9426	57.274	57.8889	42.3396	44.9637	40.708	48.0835	34.9202	39.2405	34.5246	120.59	129.53	116.335	125.215	116.761	178.4
NM_001001507	24.7545	38.7248	30.9863	24.2434	43.4967	47.4403	47.6815	32.3953	42.9583	24.2738	24.6124	225.477	260.409	259.829	257.053	212.71	312.698
NM_001001508	15157.9	18010.1	17499.1	16168.4	23792.2	23203.6	22721.5	24636.6	25830.4	26461.3	25617.6	49481.6	47280.3	50533.6	48726.5	50928.9	48976.1
NM_001001509	30.863	26.7727	33.5158	45.4274	57.2284	53.892	49.0902	42.6171	51.0422	33.4576	29.3548	263.717	239.107	261.194	277.834	242.989	277.139
NM_001001510	67.0075	63.9932	72.5673	58.456	74.5024	62.3631	81.0441	89.8113	64.4032	55.5645	62.4673	139.778	138.357	172.497	224.55	182.431	265.9
NM_001001511	258.481	231.438	180.677	340.313	249.73	243.298	342.271	278.909	250.24	254.464	289.156	550.51	907.75	725.4	574.693	589.099	537.876
NM_001001512	6583.13	5714.45	5792.99	6125.57	5587.87	6406.85	6203.33	7112.29	6847.14	7212.1	6849.55	19118.8	20782	18530.8	20237.3	22213	20284.1
NM_001001513	629.997	453.833	559.403	643.053	631.057	604.583	588.057	551.848	649.115	542.729	668.796	1522.21	1633.21	1561.32	1768.41	1703.2	1484.73
NM_001001514	3940.96	4526.34	3973.54	5401.35	3310.47	3643.19	4137.94	4684.37	4358.37	4113.28	4239.14	13376	12001.3	12946.4	11849.1	12161.9	13460.1
NM_001001515	6492.94	8645.94	8918.17	7982.64	11959.3	11330.9	9524.31	8027.34	10037.1	8466.44	10537.7	23814.5	19557.8	25066.6	24844.7	20782.9	18413.7
NM_001001516	5650.77	4556.8	5660.42	5122.89	4826.41	4275.57	4057.07	5098.46	5147.44	5070.18	5158.65	16876.4	16505.4	17242.9	16322.2	20444.9	16787.9
NM_001001517	7285.42	6944.4	7379.62	7813.44	6265.61	6360.08	6904.04	6323.43	6423.05	6717.22	6905.48	15343	16559.5	17239.8	17158.3	15974.5	15220.3
NM_001001518	65.4754	28.4713	14.1224	26.0011	30.5128	64.331	47.1142	34.6186	37.4397	69.4483	78.2381	50.5971	96.326	592.248	181.329	193.289	85.0575
NM_001001519	20.4461	27.5912	20.5852	17.069	22.7241	31.1005	16.5172	21.629	15.6674	19.2454	16.628	70.537	102.28	72.0571	95.3853	99.2444	122.364
NM_001001717	40.4445	114.576	53.8327	64.136	46.2307	52.4536	58.1413	44.3644	43.1415	58.5081	50.5454	121.942	200.364	158.586	136.021	174.884	219.808
NM_001001718	1527.88	1396.22	1529.51	1559.85	1685.91	1590.93	1494.34	1436.75	1479.34	1431.96	1685.95	4907.17	3880.35	4894.79	5298.47	4756.95	3855.47
NM_001001719	142.541	116.615	104.756	215.789	161.391	143.035	171.856	159.718	139.507	157.288	171.604	432.79	364.574	487.507	762.952	393.037	292.898
NM_001001720	125.026	77.0454	82.7163	112.844	99.1823	93.4454	96.1678	80.4157	110.222	80.7866	112.216	622.845	320.341	450.364	538.206	447.062	441.818
NM_001001799	4159.31	5647.87	4780.33	5918.83	4947.05	5870.87	7554.75	7210.17	6588.42	4591.39	6601.35	16426	9579.86	13879.7	14621.8	11460.1	12642.9
NM_001001800	4274.33	3304.51	4190.44	4009.85	5092.21	4704.76	4540.05	4279.46	4038.06	5672.07	4368.44	10734.9	11976.7	11060.6	11753.1	9495.49	11348.4
NM_001001801	517.393	262.337	440.711	440.278	323.082	327.946	287.673	317.777	256.154	331.328	391.587	706.651	703.505	768.647	791.316	825.138	694.437
NM_001001934	146.11	169.265	119.662	173.054	136.495	112.524	126.433	137.353	82.4637	155.401	132.926	279.696	246.506	275.365	279.964	289.6	327.313
NM_001001969	214.339	261.947	196.817	193.89	188.522	210.173	184.366	193.565	212.517	156.616	170.87	619.707	868.902	474.18	572.144	546.722	524.39
NM_001001970	44.049	58.1156	48.9238	47.2	74.3405	47.3759	50.4091	47.9071	39.3807	65.1221	38.9447	167.446	221.959	185.822	137.167	166.141	234.73
NM_001001972	78.4564	222.07	105.124	217.624	109.478	66.172	152.063	86.6593	95.8757	160.511	64.5523	328.934	227.154	361.685	304.432	181.697	803.646
NM_001002016	3896.45	2777.02	2800.38	3178.29	3243.96	3467.77	3612.11	3398.99	3541.83	3885.42	3785.09	7974.12	8870.42	10026.1	9405.84	9246.56	8448.76
NM_001002022	6605.95	6538.5	5636.51	6944.34	6662.93	7174.85	7729.74	7785.09	7340.99	7524.92	7581.23	19255	17492.6	15652.9	18580.7	17671.5	17102.9
NM_001002023	4082.44	3655.81	4075.35	3295.13	5046.18	4867.26	4974.63	4066.57	4201.88	4172.11	4330.52	9967.4	9539.86	9014.28	10032	10400.5	8968.9
NM_001002024	240.435	191.37	224.421	245.651	270.276	247.292	282.665	425.978	372.44	380.168	386.382	767.496	343.421	730.825	707.451	419.449	598.572
NM_001002025	41.1637	50.8415	36.9603	28.2605	21.8443	25.5648	26.8061	21.7345	27.8082	36.0221	29.7948	107.857	185.432	130.489	166.785	128.11	123.768
NM_001002253	5923.28	6110.56	6534.33	6523.15	6114.89	6753.26	6241.39	6826.99	7504.21	5748.58	7276.08	21099.7	13912.5	18478.6	19402	18494	18436
NM_001002270	19.895	15.0101	13.3463	13.0029	14.7664	16.6925	12.9191	16.6906	13.3909	16.128	18.1689	122.981	63.9939	83.9818	94.2202	77.8279	87.1225
NM_001002277	7350.8	6242.04	9076.18	6575.18	3969.59	4857.28	6791.6	7034.52	5873.07	6307.87	6325.74	16514.8	18528.8	16202.3	15478.4	17389.5	18696.9
NM_001002278	247.347	334.96	224.316	369.009	287.034	282.765	369.541	354.318	353.455	412.558	341.466	1480.92	1346.74	1743.57	1432.44	1548.4	1306.69
NM_001002279	2243.78	1957.87	2322.72	2155.73	2438.36	2384.31	2315.04	2070.43	2389.22	2167.92	2673.98	7836.98	7344.77	7257.81	8211.27	8656.57	8474.8
NM_001002280	10.7652	18.4098	11.6955	14.0582	10.3763	10.1868	10.9443	12.9682	10.8458	12.4032	11.2798	52.8845	46.3698	49.8358	45.6242	42.2823	49.9112
NM_001002281	37.0253	50.0954	29.0859	26.6059	25.0343	21.1863	25.6443	27.3102	35.2518	32.9934	39.0641	149.576	172.513	135.545	228.121	107.643	168.527
NM_001002283	25.9077	43.0751	32.7567	33.4372	21.1307	24.5336	23.0205	24.5104	23.2439	28.4364	30.0495	68.9413	117.342	88.3299	141.864	67.9761	129.336
NM_001002284	12.4915	21.9578	13.9309	15.1545	17.6681	14.8626	13.8577	17.7691	14.4201	15.3716	16.8233	57.7969	182.248	99.4388	65.4711	58.4709	69.0394
NM_001002285	18.7596	33.2697	19.3122	17.8391	17.835	19.622	20.6324	19.96	19.5054	23.2118	29.8013	80.0582	74.3917	73.05	77.5599	104.311	91.3416
NM_001002286	24.8057	25.799	22.2172	17.3241	20.8502	19.6235	23.8962	27.4552	26.5549	21.7795	21.5522	70.7447	104.201	198.859	86.0543	111.128	83.5545
NM_001002287	14.9223	29.0308	19.7154	23.3913	15.1193	16.0384	19.3047	19.661	12.0498	16.7367	20.7047	74.1864	161.413	107.281	75.0701	93.9889	92.9953
NM_001002288	787.793	850.434	748.851	1227.89	717.896	855.838	1439.08	1649.79	1264.19	1060.25	1113.72	4498.1	2325.68	3333.29	3410.08	2727.18	3355.74
NM_001002289	9094.07	8509.27	9599.31	9699.31	12312.5	12252.6	10716.1	10220.7	10444.7	13096.4	10747.2	24914.1	27119.3	25097.9	27951.9	26757.9	25653.6
NM_001002290	21.4362	31.8617	18.7663	20.5138	25.565	22.0146	19.2278	21.0809	20.9876	29.6293	27.208	186.393	217.914	107.862	211.486	116.964	183.213
NM_001002291	45.585	224.459	81.9134	83.729	78.3149	73.3687	64.084	70.3907	65.0283	126.568	90.6654	154.596	355.51	182.867	157.435	155.536	447.078
NM_001002798	1896.17	2217.18	1908.07	2460.66	1889.01	2010.12	2292.58	2230.81	2051.5	1501.74	2035.22	6123.63	4113.15	5639.93	5941.63	5662.81	5996.52
NM_001002802	937.262	1618.71	719.226	1387.32	650.408	597.742	1588.12	1377.54	726.848	481.113	1419.02	1321.23	1515.32	1156.29	1327.99	977.668	1446.01
NM_001002803	18.6106	18.4261	20.2343	22.1973	23.7656	23.0971	23.2177	17.27	19.3131	20.7311	17.0993	77.9539	57.2196	53.7261	59.7904	72.8082	74.829
NM_001002804	165.164	57.3191	113.12	108.391	104.82	98.5757	116.065	96.4064	87.5081	106.533	127.553	303.665	354.994	279.139	416.159	481.153	286.656
NM_001002805	2024.35	1290.35	1982.88	1901.26	2170.72	1829.88	1123.65	1342.7	1200.47	1396.38	2896.64	4587.57	8014.8	5069.97	5803.46	4996.22	5440.59
NM_001002806	15.9608	48.4108	21.6434	19.0239	21.3144	30.054	23.2293	16.9418	23.5771	26.8516	24.6138	73.1459	68.955	84.3374	77.7642	73.6438	114.006
NM_001002807	1491.47	988.501	1184.55	1089.81	1223.11	1014.32	1117.71	1033.88	1085.65	1083.33	1345.26	3733.27	4164.28	3432.37	4244.3	4925.69	3290.58
NM_001002808	52.3828	24.6447	37.4219	18.8421	23.0463	22.5068	21.8875	19.3047	18.4297	21.0242	21.9634	124.938	218.052	78.1014	122.874	87.9665	99.6933
NM_001002809	7590.81	7584.62	7728.42	8559.4	6741.85	6597.24	7099.66	8650.71	8358.03	8274.16	8420.57	23419.9	19105.1	22329.7	22498.5	22963.7	19897.9
NM_001002813	25.6962	38.3343	25.6805	25.8529	31.0069	27.0496	29.3273	23.0988	23.2642	32.8868	35.3105	104.242	119.778	98.7984	92.9481	79.2149	162.236
NM_001002815	2900.65	2438.85	3834.48	2066.69	2300.77	2340.1	2700.44	2830.73	2736.62	2416.68	2801.41	5358.61	5700.35	5682.64	4648.67	5010.74	5339.31
NM_001002818	1695.42	1729.84	1779.45	1705.37	1541.74	2336.39	1467.67	1740.13	1841.57	1634.7	2014.6	5221.09	3548.2	4773.66	5454.34	4893.34	4057.79
NM_001002819	444.724	327.89	324.603	425.801	300.061	303.598	370.053	413.167	346.465	271.824	454.358	946.142	576.498	659.751	752.234	712.935	687.402
NM_001002820	41.3521	47.1561	37.9616	48.9751	49.8982	47.4198	45.9865	43.3453	52.1463	36.4575	55.2441	124.044	90.4214	114.216	84.3875	123.231	125.081
NM_001002821	38.6957	37.7052	39.1463	34.8206	34.2236	31.8737	33.8046	27.0929	51.7139	30.7486	25.8708	105.409	134.576	96.9349	65.9559	100.939	139.947
NM_001002822	499.05	552.538	445.449	958.876	569.53	284.817	601.162	387.414	484.061	461.841	371.919	1172.78	1153.13	903.177	1340.76	1430.22	2935.08
NM_001002823	98.1891	59.5108	64.0854	92.4688	61.1599	68.1905	77.2071	83.0285	81.6352	83.3703	121.641	225.694	319.665	260.27	394.231	273.024	375.666
NM_001002826	56.3711	160.087	83.6771	88.3376	59.3432	63.1844	57.1499	53.7959	53.0533	75.3207	73.419	204.084	167.075	117.811	98.3894	174.505	191.973
NM_001002827	92.9542	76.616	90.1423	91.4039	84.1329	87.4116	86.9309	70.0545	63.0789	66.4587	118.776	307.284	226.096	292.908	342.374	260.655	481.016
NM_001002828	3763.22	4531.21	3705.21	4942.47	4704.37	4573.99	6065.4	5569.07	5771.36	5621.54	5564.97	15071	12686.7	13369.4	14298	12913.7	12960.8
NM_001002829	349.955	232.004	469.17	277.045	337.02	405.617	266.391	256.448	301.743	297.038	309.038	638.667	822.468	939.854	1283.82	1058.5	504.558
NM_001002830	1289	1403.28	1667.51	1865.23	2344.98	2246.79	2229.77	1569.08	1896.97	3050.99	2985.76	7828.9	4618.56	9897.89	8406.53	7517.96	6279.71
NM_001002831	713.661	565.622	783.973	627.033	673.74	710.094	557.593	499.989	671.353	545.923	784.953	1761.87	1565.2	2092.97	2094.95	1719.53	1780.82
NM_001002833	285.817	714.76	486.974	446.626	345.599	327.722	342.94	307.158	279.725	400.413	222.869	1471.67	2304.78	1696.04	1219.11	1458.98	2292.37
NM_001002834	82.9886	323.577	130.05	133.309	114.509	102.668	100.923	95.6891	81.3865	163.663	160.023	225.576	323.308	197.446	134.809	308.453	380.812
NM_001002835	1608.11	1135.56	1512.01	1369.54	1045.13	857.632	1234.67	1282.84	1032.34	1069.78	1174.55	2871.46	3874.17	2347.57	2438.21	3997.76	3668.42
NM_001002850	226.464	153.561	263.017	251.219	161.775	132.887	119.489	228.929	252.382	132.904	60.8448	950.979	931.946	1044.11	1056.69	838.232	1048.64
NM_001002851	4806.27	4603.73	4927.02	4472.35	3607.42	3180.31	4025.41	3729.43	4019.5	2756.32	3821.52	12123.5	8199.42	9269.64	10041.6	9678.51	9456.96
NM_001002852	23.4698	18.8819	18.0412	24.7429	19.0918	18.8405	15.8259	17.2824	16.6352	16.5712	23.1386	60.4108	59.9699	68.6267	64.7927	74.2447	44.9961
NM_001002853	1238.86	1390.11	1364.15	1343.7	1218.14	1316.73	1079.36	1122.58	1153.41	992.29	1039.53	3292.42	3242.49	3135.4	3806.55	2549.69	2592.85
NM_001002854	3591.11	3359.64	4035.69	2276.11	5767.88	5332.66	4686.37	4656.2	5793.08	5662.57	5007.52	15452.8	12537.5	16832.6	14865.8	13608.2	13809.5
NM_001002855	14.2028	14.6781	15.4636	16.8324	30.3365	30.1176	24.7996	13.6025	16.3463	15.3172	11.7046	64.4623	69.0016	114.8	67.5493	114.009	81.7531
NM_001003401	8817.39	10420.7	10861.2	9281.96	16150.6	16164	12851.9	11022.8	13484.7	16471.2	13728.5	25897	24628.6	30396.5	30374.3	30701.2	30110.3
NM_001003403	458.338	189.671	116.926	958.377	476.851	217.676	273.263	704.371	702.65	195.865	190.971	572.881	169.484	854.776	1115.34	227.3	1153
NM_001003404	42.9868	34.3025	33.842	41.9926	37.4197	20.3739	33.4526	45.676	57.1053	31.3391	36.1406	139.675	136.904	97.5787	101.605	103.687	85.224
NM_001003409	33.9422	171.086	66.5514	75.6384	45.0466	56.4344	59.609	52.9788	41.7943	90.1606	72.7555	353.019	465.166	343.837	949.295	207.472	499.885
NM_001003653	221.182	170.939	185.989	278.735	183.819	209.732	201.457	171.947	202.134	158.811	242.057	485.069	342.906	490.868	461.23	501.536	489.098
NM_001003654	931.322	997.006	1001.57	1263.74	1028.08	1048.73	1179.75	1270.12	1395.49	908.227	1199.25	4216.01	2862.81	4007.81	4141.29	3195.85	4118.69
NM_001003673	3828.03	3332.88	3519.77	4001.81	3142.95	2866.58	3347.66	3799.41	3582.34	3965.7	3493.45	11293	10344.4	11633.3	11724.1	11214.2	11781.8
NM_001003691	34.8937	30.6424	37.392	33.9848	37.5707	44.4129	31.9704	27.2438	43.6609	21.5287	23.724	105.884	101.301	91.9661	135.041	113.551	127.982
NM_001003705	803.092	776.399	763.347	997.159	870.311	880.974	974.481	989.848	999.335	946.688	1091.11	3549.07	2706.47	3143.36	3490.2	3267.38	3157.08
NM_001003706	126.181	105.454	124.141	135.891	100.874	107.218	100.587	66.4291	65.5486	68.1445	81.339	327.892	370.148	351.673	286.152	269.169	370.977
NM_001003707	72.7349	65.9376	66.7392	66.5602	67.3339	60.7675	66.649	60.6448	63.179	46.7684	39.8751	177.288	265.008	503.086	179.947	182.701	285.496
NM_001003708	2229.19	1715.86	2083.28	2159.01	2041.85	2362.68	2150.62	1949.54	2110.75	1749.25	2279.28	4587.18	3471.09	4443.39	4994.53	4437.56	4241.71
NM_001003709	8967.22	8254.66	8673.55	8044.6	9716.99	9637.97	8210.88	9242.23	10206	9746.28	10588.5	24453.1	24424.5	25949.3	25712.6	26763.4	24326.8
NM_001003710	367.297	305.392	344.894	346.943	512.484	357.095	440.147	385.931	402.317	343.011	334.018	1451.43	1177.27	876.552	1240	1238.95	1146.45
NM_001003711	1927.79	3104.97	2715.32	2601.22	3275.26	3241.53	3893.01	3599.23	3701.25	4049.54	4527.38	13189.5	10711.4	14382.7	14400.8	12279.1	12342.9
NM_001003820	31.2754	42.5019	43.3283	42.7772	75.2665	49.2315	52.1632	47.7901	46.859	49.7435	52.742	111.72	118.262	128.427	179.669	113.716	156.525
NM_001003928	67.0299	22.2015	36.7899	17.5239	16.4583	17.3918	16.7929	18.9674	15.8477	15.9198	16.4922	75.5519	65.9276	91.1137	58.4239	59.677	61.5937
NM_001003929	9762.87	10887.6	11108.8	8676.05	9478.92	8817.5	10530.8	6568.13	8244.8	8691.93	8776.98	24071.4	20331.4	19924.7	24533.5	22643.7	24286.8
NM_001003956	86.9132	141.363	138.559	135.643	141.845	121.083	156.941	134.499	104.228	108.142	55.1705	333.347	283.069	245.041	317.41	302.11	615.763
NM_001003957	1734.79	2048.79	1711	2226.62	1863.24	1626.4	1695.94	1701.54	1726.26	1712.47	1908.81	6082.54	6336.87	5883.88	6486.45	5391.26	5201.28
NM_001003959	123.742	58.5125	32.2694	104.762	96.9135	92.9059	83.6246	70.9447	73.4941	37.3231	64.2814	96.0187	244.848	216.304	357.792	413.823	116.122
NM_001003964	24.5316	31.7129	30.7328	40.0037	41.5962	32.3247	43.197	23.8439	27.4216	39.2122	30.6072	196.529	169.361	190.295	175.482	208.808	137.636
NM_001003965	32.7508	129.084	67.3956	46.5036	43.9809	43.3065	45.6695	41.1602	33.3082	70.1306	57.5934	181.276	158.167	111.7	114.224	140.751	197.265
NM_001003974	666.839	567.982	700.283	618.576	761.247	724.934	698.871	586.766	797.455	649.291	706.862	1617.45	1974.83	1938.14	1891.05	1645.74	1549.89
NM_001003975	2032.76	2022.44	2107.67	2080.74	2027.34	2085.73	2106.78	1804.1	1965.11	2056.94	2017.45	5443.06	4466.81	4575.67	5987.23	4854.29	4819.91
NM_001003976	49.504	36.2499	32.455	32.1283	46.8725	39.03	60.9192	46.2737	43.4582	53.3619	48.6762	132.607	180.812	130.894	218.214	135.26	161.661
NM_001003977	39.0987	69.3072	44.9724	55.0848	36.3964	41.9227	34.5321	38.1023	46.1233	39.2348	33.502	92.9512	137.681	120.624	128.58	91.2339	140.674
NM_001003978	7125.78	6086.73	6752.03	6456.53	8326.89	7839.07	8253.8	7891.15	7471.65	7882.44	7415.89	18145	16952.9	16465.1	17441.2	18719.3	16346.4
NM_001003979	20.421	20.4605	17.9334	17.73	17.2884	19.9018	20.9173	17.0825	16.9175	19.2678	20.5729	63.7441	82.2717	82.667	72.9427	141.757	66.8136
NM_001004020	13.3908	15.6453	10.7269	12.8685	12.8299	14.8253	13.4349	12.8518	11.863	13.9351	11.5659	67.2438	67.6214	54.7131	67.0436	57.542	77.1224
NM_001004021	38.5429	51.1764	44.2634	68.3498	52.5438	52.7118	38.7637	45.0651	45.3986	42.1725	58.3998	129.152	102.149	104.125	110.24	177.262	154.679
NM_001004022	66.9627	82.3668	91.0119	69.438	90.2415	98.8297	112.098	81.9638	96.4898	85.5198	73.3317	284.51	286.175	311.365	284.304	245.718	348.697
NM_001004068	1598.88	890.396	1309.38	1115.75	1851.39	2063.27	1743.26	1646.22	1891.34	2517.62	1850.05	4713.92	6394.18	6382.16	6138.1	4470.99	5112.34
NM_001004069	129.189	181.812	156.101	197.219	205.967	211.64	284.499	232.158	233.36	265.487	198.088	589.7	630.215	560.66	509.202	421.992	661.621
NM_001004070	138.552	68.9077	128.587	112.299	192.76	165.559	112.026	96.9998	161.446	148.615	214.449	475.386	433.608	496.704	649.579	658.937	445.034
NM_001004071	36.1114	38.7507	33.0787	39.9064	44.9669	36.0719	45.0959	30.1606	34.8097	27.4492	37.1547	75.9336	105.162	73.7697	120.017	75.524	145.851
NM_001004072	18163.3	17423	17945.4	19990	16683.5	19316	17452.6	18239.2	17477.7	18125.7	18693.2	41838.5	38717.1	39260.1	41799.4	37491.6	39233.8
NM_001004075	6122.21	5321.28	6047.75	6011.36	5479.01	5903.87	5894.12	5542.8	5525.82	5235.6	5452.61	13779.6	13322.5	13085	14196.8	12180	13746.9
NM_001004076	374.852	229.445	385.886	406.631	318.46	360.455	311.4	266.249	272.402	248.772	395.168	701.445	997.074	1017.96	1062.03	993.483	614.695
NM_001004077	27.0283	39.2054	30.9648	35.0693	31.9142	28.5365	33.4986	32.1966	24.0603	28.0753	27.3356	53.5357	112.294	68.4486	114.527	54.8111	68.6582
NM_001004078	13164.3	11459.9	13331.4	10957.4	12185.9	12510.8	12316.9	11398.2	11312.9	11604.2	12084.3	28155.8	27014.2	27799.5	30362.8	27363.5	28821.4
NM_001004079	37.7208	31.6135	34.7597	36.2273	45.0027	55.4967	50.7234	46.2228	39.7705	33.7536	27.4791	155.246	99.7897	97.173	126.185	124.939	150.68
NM_001004080	10738	5455.18	8058.22	5746.14	10108.8	9853.4	9806.84	8356.08	8701.94	11748.9	10853.9	20905.5	28426	25906.1	23435.4	26888.1	19037.2
NM_001004081	5335.12	3942.99	4975.04	4492.39	4298.93	4451.02	4653.16	4088.9	4297.21	4402.34	4792.38	12879.1	10162.3	12565.2	13466.9	12261	12013.4
NM_001004082	26492.4	27589.4	26465	26339.1	30197.2	30844.4	31333.8	32128	33167.9	34103.9	32716.8	49408.6	51965.9	52539.4	53114.3	53777.3	56289.3
NM_001004083	7542.25	8106.78	7549.84	7822.47	8404.14	7569.22	8750.92	7876.54	8159.74	7074.63	8097.06	22808.4	20842.1	21521.9	23217.3	23398.7	21817.4
NM_001004084	250.529	55.0394	106.714	67.1953	94.1823	69.3888	84.475	64.1225	66.7863	63.8121	160.831	443.467	583.394	262.074	297.195	1141.92	377.312
NM_001004085	8326.92	9255.11	9473.05	8669.63	9200.26	9940.48	9758.69	9712.64	10081.8	9246.8	10612.7	21523.7	19345.2	20407.6	21812.8	19943.4	18741.4
NM_001004086	1191.27	83.8233	233.423	98.954	89.9228	73.2667	94.6903	76.8902	74.9708	128.177	175.114	1277.47	750.059	185.362	1760.57	4474.94	181.745
NM_001004087	2648.95	3120.25	3157.3	5047.45	2273.33	2508.79	3081.73	3011.12	2809.44	2278.54	2888.18	7032.22	6325.47	5603.87	6193.12	5700.44	7668.81
NM_001004089	398.706	293.32	369.851	338.086	308.852	366.162	298.26	350.632	351.32	367.801	445.253	1488.01	1622.48	1072.21	1455.23	1766.75	1168.23
NM_001004090	11967.4	11634.5	13866	14679.1	15300.6	14537.3	13909.5	14017	14776.3	15577.8	14828.5	35926.1	37351.7	38537.5	35338.3	36477.6	35547.4
NM_001004091	15.3897	22.2479	21.2456	16.7526	25.5235	33.4965	28.807	21.3657	23.6474	20.3254	33.0348	211.954	235.293	243.09	197.614	268.077	290.851
NM_001004092	18.0862	27.0559	21.2365	21.1133	31.7954	21.9641	26.277	20.8769	21.1941	30.7262	30.5197	91.3157	124.586	95.8727	141.789	87.7673	123.414
NM_001004094	6203.57	4951.59	5232.03	5510.48	5347.64	5735.03	5365.3	5525.22	5255.04	5393.23	4629.84	12435.1	11577.6	11292.6	11363.9	11180.6	12200
NM_001004095	474.456	239.863	517.704	207.405	275.304	293.455	248.3	293.211	268.473	223.685	443.151	979.981	1731.66	979.106	989.497	1023.96	510.885
NM_001004096	21.6456	17.9889	12.6724	19.6092	17.2651	19.3368	18.9183	17.9552	20.6797	21.8559	24.165	84.2294	70.9805	107.898	72.3241	108.692	90.9494
NM_001004097	40.8127	143.372	52.5434	48.5044	42.0276	41.904	37.8586	47.4631	30.6125	52.0438	61.9096	190.166	252.661	113.349	126.454	92.8125	234.472
NM_001004098	531.592	394.404	472.19	499.137	449.854	499.504	435.477	473.683	468.869	443.096	499.196	1526.2	962.905	1523.38	1640.72	1397.64	1353.93
NM_001004099	396.577	281.756	416.259	304.785	337.459	346.202	347.101	366.774	337.389	364.196	770.312	822.62	1877.54	654.76	984.98	1178.96	565.809
NM_001004100	137.595	195.597	251.513	149.655	199.777	176.924	177.025	168.012	150.393	141.704	149.458	450.925	383.139	422.646	781.765	375.047	565.205
NM_001004101	284.072	49.5446	48.7366	45.9646	50.2498	41.685	40.9547	35.2276	41.1117	31.9748	30.5759	184.01	250.344	96.5909	385.637	964.14	158.66
NM_001004102	2529.98	2373.84	2622.74	2654.62	2568.7	2691.87	2354.19	2559.36	2564.7	2383.35	2431.47	6628.3	4508.21	6253.28	6161.87	6866.06	5216.09
NM_001004107	1411.59	1631.25	1334.12	2247.5	1467.05	1579.72	1930.07	2346.91	1940.72	2762.95	1745.82	5833.64	5979.27	5489.39	5981.93	5132.18	6840.18
NM_001004129	15.29	23.5007	21.7715	25.0786	22.3353	19.6408	20.1269	19.0329	21.3774	19.2649	25.727	70.4631	89.3962	85.3698	69.3504	153.763	64.227
NM_001004130	24.3471	58.6827	32.2073	31.2966	27.298	25.9133	26.9983	24.7818	28.3503	31.7193	33.6373	61.4018	63.547	126.511	65.9446	79.5984	94.9094
NM_001004131	58.6469	156.357	88.3343	128.533	73.8347	68.0872	62.1691	57.076	60.2935	85.9021	59.2866	193.501	449.839	236.603	170.043	164.98	317.48
NM_001004132	17368.2	16692.1	17790.8	19296.9	17018.9	15718.8	15895.5	16729.8	17739.6	17411.2	18529.3	40222.1	37889.6	43597.7	43360.8	40666.5	44048.7
NM_001004133	1118.91	1876.71	783.864	2460.05	1654.82	994.88	2666.66	3741.37	3767.99	3349.68	2586.8	10755.7	8583.72	10269.6	10574.7	8109.17	10820.7
NM_001004198	4514.68	3736.38	4254.14	4246.18	4231.79	4229.28	4032.97	3512.96	3740.48	3715.76	3709.81	7702.14	6926.36	7317.81	7459.78	8322.64	7279.42
NM_001004199	9703.7	7774.71	8168.52	9141.25	9507.48	10384.9	8744.72	9278.04	8971.42	8199.46	9332.14	21902.2	21463.9	21310.8	21519	24178.6	21107.4
NM_001004200	7373	6140.47	7087.35	6345.17	7862.98	6842.67	7516.27	7459.48	7433.95	7319.01	7536.96	20091	19259	19611.4	21284.1	21291.7	21485.5
NM_001004201	4252.76	1624.31	4393.15	1256.21	2880.57	2391.34	2413.84	2475.13	1967.64	1959.45	2744.97	7098.33	10234	4984.96	7006.48	9116.92	3189.54
NM_001004202	440.988	80.0483	198.572	125.271	369.682	322.448	114.471	114.833	141.532	179.407	251.576	451.461	708.76	302.018	875.188	979.102	434.653
NM_001004203	1367.92	925.262	1356.16	1084.56	1510.81	1386.71	1306.81	1200.23	1269.35	1504.14	1391.58	3049.58	4189.32	3774.3	3877.9	3656.63	3711.26
NM_001004204	12805.2	10495.9	12012.6	10910.7	10252.6	10407.2	8295.3	9211.31	10397.8	10047.1	10746.8	26052.5	26151.4	26988.1	29452	35134.8	25735.8
NM_001004205	3597.36	2861.05	3336.47	3030.48	3610.62	3680.25	3018.38	2902.91	3707.97	2778.71	3629.26	11069.5	9009.47	10486.7	10243.9	12242.6	9444.24
NM_001004206	11743.8	10683.6	11252.5	10976.6	11880.8	12234	11605.7	10203.1	9730.28	10028.5	9954.39	20813	23404	21645.3	21059.6	20029.6	21354.5
NM_001004207	1852.02	1706.04	1807.82	2186.21	2142.71	2094.6	2231.47	1861.16	2060.94	1715.27	2060.4	5836.82	4275.81	5117.66	6433.72	5099.3	6631.54
NM_001004208	6944.3	7613.48	7418.88	7510.46	6478.6	8123.47	7518.08	6725.96	7264.86	6067.6	6166.07	16137.5	13463.6	15712.2	17296.1	17945.3	12816.6
NM_001004209	11314.3	9829.6	11422.6	9157.65	12309.9	12004.6	9567.26	8962.2	9719.42	10748.6	9914.67	22045.2	23906.4	26312.8	25909.1	23892.1	20629.1
NM_001004210	5493.38	6443.55	6196.88	5744.39	5826.18	6370.14	6010.11	6266.11	5978.68	6375.12	6515.45	17880.5	12974.2	15858.1	15189.5	18589.6	15148.6
NM_001004211	1233.2	1414.82	1637.15	1270.69	1377.29	2068.14	2102.33	1703.57	1925.84	2157.6	1378.3	4516.71	3949.93	4815.21	5022.5	3659.71	5954.8
NM_001004212	12127.8	13149.8	12791	14391.8	11228.9	11729.4	12284	12758.1	13111.2	11252.5	12708.2	28429.4	27156.3	29817.5	30196	33778.6	33367.2
NM_001004213	17896.7	18436.7	18671.2	18151.4	15368.7	15368.7	18551.9	16987.6	17512.4	15829.1	17754.8	45758.6	46047.2	45295.7	38603.2	44129.1	42071.6
NM_001004214	904.005	463.549	343.874	274.199	522.867	633.76	163.971	488.927	230.552	523.72	298.125	615.41	737.95	1846.59	1977	1737.98	1288.91
NM_001004215	1240.8	832.84	977.251	975.631	907.407	1060.92	815.467	700.187	787.711	771.057	1243.04	1692.19	2708.38	1834.53	1936.51	2496.97	1558.43
NM_001004216	29.3292	49.9862	38.783	67.5651	30.7713	34.5752	43.688	33.2825	26.9446	36.6187	37.2107	100.944	186.288	179.972	106.694	117.816	128.789
NM_001004217	846.721	738.524	818.71	916.074	926.712	1088.27	887.2	806.641	905.27	812.938	862.065	1963.78	1247.32	1738.01	2015.98	1959.18	1621.18
NM_001004218	6119.52	4331.26	4186	5086.42	4619.18	5040.11	4586.92	4399.16	4129.99	4261.37	4721.39	11699	12511.5	11888.4	13154	16400.1	10768.8
NM_001004219	2241.69	1748.97	2570.11	2494.71	2378.85	2087.11	2087.87	1758.2	1767.99	1764.39	1850.43	4757.41	6248.97	5741.76	6203.58	5772.65	6329.02
NM_001004220	3548.89	3425.88	3218.52	2662.9	3242.06	3281.78	3693.35	2702.22	3358.57	1952.52	3605.52	7549.33	5999.13	8162.61	8121.6	8001.69	5179.32
NM_001004221	5488.85	5333.65	5798.03	5588.34	5673.68	5422.37	5795.26	5958.51	6247.32	6336.65	6900.15	17581.1	14835.1	17738.1	17448.2	17388.9	15841.3
NM_001004222	4306.79	4317.26	4744.87	5285	5430.14	5292.85	5112.46	4260.91	4423.43	4095.69	4387.65	14612.7	10640.7	13909.2	12933.2	13842.1	13464.4
NM_001004223	15646.4	15773.4	14741.7	14311.9	18918.6	17996.1	17521.5	16636.3	16726.5	15856.2	14701.9	37398.3	36477.3	33430.6	38864.3	39579	39959.6
NM_001004224	14869	12366.2	13894.8	13192.6	11848.5	12461.7	12319.9	12592.7	11805.7	12132.1	11927.7	36152.9	33886.8	31610.8	35526.1	40647.2	32535.6
NM_001004225	4526.33	3743.58	4554.29	4642.4	4460.91	4674.53	4290.24	4212.94	4416.47	3937.97	4518.52	12263.8	9451.19	11145.5	12505	11049.6	12297.3
NM_001004226	4018.39	2343.37	2827.79	2438.77	2419.15	2514.37	2261.34	2468.76	2736.41	2458.22	2939.82	9119.32	9519.93	6894.59	8569.86	13402.8	6849.46
NM_001004227	6226.48	4580.29	5286.01	5274.36	4617.23	4927.56	5405.53	4142.26	4596.1	4378.92	4884.23	14056.9	15190.8	14257.3	14436.1	14917.6	14755.4
NM_001004228	2562.11	1305.16	1640.51	1664.09	2648.36	2034.68	1536.24	1357.84	1822.06	1734.33	1701.83	4642.15	4701.69	3737.74	4908.8	5397.89	3479.64
NM_001004229	4345.26	2952.7	3601.52	3395.58	4405.81	4349.69	3508.17	3490.01	3341.1	4072.01	3792.67	7710.6	8300.55	8854.35	8943.82	7870.24	7772.74
NM_001004230	3228.63	2626.99	3257.2	2958.43	2920.43	3225.46	2799.2	2729.95	2955.16	3007.07	3221.87	7991.12	7799.7	8158.64	8887.65	9352.33	7321.92
NM_001004231	4112.7	4801.28	5031.36	4914.66	5049.82	5226.34	5259.76	4707.5	5383.8	4248.52	5534.49	13041.2	10780.5	12903	13409.3	12312	11705.9
NM_001004232	44.8678	75.8208	44.1998	63.4969	63.1399	60.2812	51.1525	67.5023	52.751	61.9261	44.3021	234.542	220.565	177.189	175.525	185.299	194.485
NM_001004233	6467.84	6183.39	6888.13	6679.46	6960.78	8193.99	7353.46	6383.15	7165.05	6509.48	6638.59	17626.7	17879.5	18155.5	17704.4	18328.8	17903.3
NM_001004234	968.087	526.651	721.046	737.475	808.157	891.421	765.667	682.636	771.804	734.412	735.328	1960.68	1922.18	1816.87	2387.63	2348.65	1660.31
NM_001004235	6226.32	6353.62	5652.81	6471.92	6208.08	6683.7	6822.26	6660.89	6623.91	5885.28	6780.27	16744.6	13772.6	15355.6	16900.8	16606.8	16874.8
NM_001004236	423.349	356.715	332.729	725.692	206.02	154.567	304.932	313.633	239.577	300.428	294.039	418.477	527.99	332.35	388.371	422.637	945.505
NM_001004237	3466.77	3299.84	3727.66	3534.94	3445.53	3879.47	3388.81	2897.04	3269.84	2976.23	3480.27	11049.5	9025.81	10796.1	10275.2	11224.7	11139
NM_001004238	7174.68	6142.71	6743.82	6542.13	6424.16	6643.15	6453.17	6654.09	6488.45	6396.79	5893.91	14151.9	17482.8	17399.3	15755	16624.6	15111.4
NM_001004239	8313.54	7294.47	7797.74	7670.07	7830.57	7507.79	8116.78	8372.88	8851.04	8309.18	8961.07	20779.9	18713.7	22730.5	20899.3	21163.9	21178.9
NM_001004240	2912.55	2348.41	3045.34	2689.69	2960.63	2692.28	2922.8	2512.33	2462.75	2394.82	2703.6	7428.34	6149.32	7490.5	7581.32	8326.83	8032.65
NM_001004241	4071.7	3861.95	3551.35	4017.26	3545.8	3927.75	3606.56	3632.1	3889.57	3040.44	3711.82	10841.1	8784.1	9530.68	10673.8	10378.8	10078.7
NM_001004242	583.914	171.401	188.195	161.939	217.679	145.946	275.192	249.577	370.423	130.373	239.127	1353.26	1039.97	426.053	1472.55	2715.12	643.539
NM_001004243	2766.08	2338.73	3101.72	2753.15	2680.16	2506.91	2515.3	2723.5	2626.71	2304.48	2652.69	7993.54	7057.24	8376.61	8286.35	7663.11	8219.14
NM_001004244	7446.21	6802.82	6883.04	6750.11	7192.7	7219.13	6378.7	7803.82	8155.81	7247.32	8376.68	20392.8	17427.2	20973.1	21033.7	19367.9	17510.5
NM_001004245	924.624	1042.22	909.718	958.303	851.569	878.959	1080.18	1141.61	1188.01	848.091	1216.49	4843.12	4606.53	4032.64	3953.76	4384.96	3792.03
NM_001004246	785.484	201.649	605.126	307.873	323.594	324.687	346.106	342.587	306.783	265.114	370.06	1873.58	2390.06	1440.9	1768.28	3065.59	708.816
NM_001004247	4311.64	4186.35	4890.24	5157.81	5560.67	5613.31	5218.61	4612.26	4985.73	5690.64	5670.21	12313.3	9238.73	13431	13961.5	12380.5	14535.6
NM_001004248	10665.1	9761.74	9963.59	10975	8480.8	10197.4	8446.38	9865.58	9024.4	9684.33	10063.6	25788.6	25513.2	23947.3	24518.9	26578	26668.6
NM_001004249	1669.47	1262.69	1241.03	1441.49	1287.19	1297.67	1213.1	1359.74	1397.06	1296.62	1488.22	4560.26	3165.8	3518.51	4648.72	5246.28	3187.05
NM_001004250	6802.57	6584.23	7288	7531.39	6734.94	6937.46	7301.2	7306.5	8045.6	6351.7	8603.11	23607.1	19371.8	23707.3	22079.7	21751.1	23053.4
NM_001004251	3027.49	2443.13	2827.16	3126.62	3058.31	3464.59	2639.23	2502.96	2651.22	2622.99	2699.64	6688.63	6768.57	6924.46	7391.13	7335.21	7004.25
NM_001004252	5527.19	4555.96	5805.64	5134.95	4849.46	5775.42	5334.8	4938.84	5091.86	5323.78	5449.4	12181.8	10699.6	12788.8	12451.7	11611.6	11031
NM_001004253	2328.52	1450.64	1947.38	1917.41	1525.61	1670.32	1604.1	1517.87	1588.2	1620.64	1630.84	4346.11	4436.86	4388.03	4885.29	5207.8	4336.48
NM_001004254	1647.44	1691.1	1892.26	1796.26	2227.35	2263.84	2217.9	2126.04	2021.52	2014.08	1749.07	4028.7	3876.31	4356.33	5107.66	3932.98	4367.34
NM_001004255	5880.89	3701.86	5144	4559.47	3778.62	3728.59	3270.52	3427.15	3305.43	3641.73	3535.69	6124.82	8700.38	8355.66	8295.71	8403.35	7840.84
NM_001004256	13275.8	12976.4	12882	14395.8	12666	14272.2	13206.3	11692.1	12467.4	12540.9	13627.7	28598.1	26797.8	31390.7	28542.4	29460.2	30230.5
NM_001004257	1816.1	1554	1483.3	1477.86	1967.28	1997.07	1994.96	1716.05	1797.3	1732.39	1738.31	5427.6	4594.28	5700.25	5481.21	4936.91	5726.67
NM_001004258	2970.73	2213.08	2695.2	2440.24	2696.69	2806.75	2434.81	2296.72	2549.27	2354.16	2780.51	5950.95	5923.14	7189.57	6440.24	6170.9	6709.55
NM_001004259	1788.12	1432.72	1810.63	1715.57	1976.49	1937.4	1670.88	1511.22	1777.73	1483.91	1652.97	5225.99	5014.11	6100.82	5603.04	6349.15	5197.44
NM_001004260	379.461	470.853	490.101	426.942	450.315	433.947	472.946	265.704	277.056	319.63	210.203	1071.02	1376.11	922.36	1064.02	905.807	1356.58
NM_001004261	858.157	795.971	822.965	804.092	740.443	841.277	782.688	569.567	756.288	560.567	853.117	1862.16	3403.57	2388.09	2558.61	3490.89	1428.63
NM_001004262	1979.49	1734.67	1605.76	1994.7	2077.94	2187.81	2160.92	1794.38	1863.38	2448.14	2181.46	4942.07	4671.15	5937.86	5969.46	5646.18	5600.5
NM_001004263	1989.11	85.4308	296.317	26.33	168.071	134.156	125.925	196.272	157.546	106.946	306.579	2955.97	2774.32	437.636	3359.11	8943.94	194.052
NM_001004264	44.4775	32.8903	31.6388	33.1064	38.189	41.826	29.142	36.1399	45.9904	41.5625	52.6959	114.744	94.9256	70.0224	88.4849	93.4564	81.6649
NM_001004265	907.704	622.809	645.192	736.549	586.202	656.518	823.296	762.529	564.405	552.409	741.206	1433.15	1819.08	936.617	1381.79	1507.93	1419.3
NM_001004266	538.356	216.335	495.466	322.919	215.048	266.346	319.737	306.893	243.043	185.418	305.727	772.019	949.381	498.723	635.327	523.547	372.688
NM_001004267	8445.5	7739.47	8946.31	8181.55	8481.84	8922.5	8662.83	7733.73	7564.35	8694.31	8438.09	18304.3	16792.2	18217.6	17336.8	16644.6	18021.6
NM_001004268	86.8578	34.8139	61.427	64.7412	29.0182	27.4903	32.2899	29.5703	39.4454	21.9	35.0699	158.347	147.901	154.024	185.07	206.992	125.529
NM_001004269	5858.17	3401.99	4867.08	3114.34	4234.95	4281.76	4207.31	3796.17	3302.63	4935.28	3811.9	11042.5	14753.7	10265.7	10583.2	13563.1	11151.8
NM_001004270	1648.28	1495.08	1817.55	1681.31	1807.93	1759.55	1974.09	1870.67	1991.65	1789.17	1959.09	4364.01	2989.56	4184.7	4495.1	4116.73	4288.43
NM_001004271	14.168	16.791	23.8437	19.497	21.4276	17.974	21.6367	22.2068	19.8543	17.8232	17.8247	116.629	166.407	115.614	164.929	106.422	113.376
NM_001004272	2956.85	2785.33	2727.98	2837.89	3415.88	3174.76	3276.89	3385.71	4067.08	3549.3	3558.79	10086.1	8952.55	9828.58	10225.6	10108.2	9065.63
NM_001004273	3920.79	3440.6	4211.04	3844.25	4094.55	4411.46	4275.17	3520.45	3634.21	3104.94	3487.19	9147.73	8651.81	10270.2	10678.8	9420.74	10400.4
NM_001004274	448.743	465.319	319.673	578.343	616.91	545.538	669.942	587.599	540.486	1297.34	1247.5	1723.4	1141.49	2375.91	2274.99	3633.37	3839.46
NM_001004275	10669.7	9619.64	9876.28	10893.6	8002.14	8298.56	8316.55	8903.56	8969.93	7891.13	9378.93	20971.2	20300.3	21332.3	21585	21282.1	20823.1
NM_001004276	1986.74	2173.99	2262.68	2208.01	2173.13	2382.99	2344.23	2067.71	2613.3	2055.51	2390.21	5379.39	4016.3	4920.48	5997.05	5603.79	5356.82
NM_001004277	908.454	779.745	820.362	998.163	705.111	812.253	798.679	915.631	943.8	823.707	1139.26	2612.75	1819.39	2418.22	2732.98	2512.62	2656.95
NM_001004278	64.4784	58.2494	59.6891	55.3651	56.8097	58.9657	77.3096	69.7289	74.3454	59.7546	67.1744	210.125	206.168	229.367	177.452	202.494	174.823
NM_001004279	5310.99	5149.47	5498.74	5400.44	5384.37	5996.26	5721.77	4775.57	4757.67	4292.69	4825.14	11108.8	10582.2	11943.6	12152.6	10228	9698.5
NM_001004280	6740.59	5429.21	6425.52	5481.32	6515.57	6413.27	6170.55	6587.43	6236.89	6702.14	5717.24	11591.4	11699	11493.4	12825.6	12763.4	12287.4
NM_001004281	970.146	1003.9	1102.04	1074.01	966.515	1462.11	1128.31	1471.41	1649.88	1562.91	1667.65	5398.74	3560.07	4242.3	5091.08	5051.94	3910.96
NM_001004282	5842.08	8479.34	8178.96	11128.1	11649.8	12667.2	11455.4	10737.6	10550.9	8924.41	11508.1	30338.4	21608	28345.9	29790.8	27728.8	31765.2
NM_001004283	5560.96	5100.88	5725.75	5616.17	6553.64	6851.41	6269.35	5508.89	5971.34	5824.56	6490	17668	17360.8	16486.8	16655.2	17497.8	17488.4
NM_001004284	1958.19	649.071	1544.49	596.873	896.842	686.706	922.197	883.6	629.176	613.319	809.966	4530.62	4764.91	2177.08	3134.95	6984.22	1443.38
NM_001004415	6834.27	6601.75	7843.58	6552.57	7018.46	7434.55	6530.55	6333.28	6130.53	6207.62	6273.08	17951.2	18864.1	16723.8	17050.9	20683.7	17734.9
NM_001004424	785.767	579.393	686.11	629.277	730.937	754.12	551.124	519.78	608.013	632.672	569.637	1121.52	1270.3	1541.37	1514.18	1215.63	1079.79
NM_001004442	14288.5	12480.3	12675.5	12575.5	12963.5	14288	14687	14146.5	12447.1	12821.9	11496.2	40773.4	32002	28874.2	30429.2	41599.7	32041.9
NM_001004443	6848.6	4595.34	5644.87	4873.3	4308.91	4172.85	4083.05	4292.08	3848.73	4743.62	4569.2	12790	14122.6	11922.1	13075.5	17073	11322.4
NM_001004444	2399.35	1550.37	2152.51	1849.22	1890.13	2074.06	1772.57	1900.51	1899.65	2269.15	1967.13	3736.69	3562.41	3949.14	3921.76	4117.37	3383.22
NM_001004445	2324.38	1815.9	2194.75	2277	2020.55	2065.82	1917.83	1905.82	1846.28	2224.87	1917.05	3741.96	3857.97	4323.07	4206.38	4440.65	3687.91
NM_001004446	16948.3	13815.2	17491.8	13958.7	15341.3	15223	13980.3	13220.9	13763.7	11377.8	11536.6	31657	35998.3	30358.5	33954.6	36293.4	31517.2
NM_001004447	55.0541	75.2015	71.2022	123.525	61.8232	70.468	62.6608	87.4396	75.4438	59.5139	46.1009	234.101	193.373	210.852	194.555	193.543	284.883
NM_001004448	240.425	213.868	264.668	466.814	290.159	312.132	328.389	252.399	270.253	277.056	322.871	585.859	651.857	566.368	516.548	655.384	726.986
NM_001004449	26.5695	30.3037	26.0008	32.3622	45.3337	34.4463	42.2784	27.8993	24.0544	29.8974	27.6719	117.545	169.054	166.488	170.937	151.665	158.463
NM_001005244	1766.53	1966.01	1920.07	2029.8	2277.85	2260.14	2630.36	2545.13	2285.41	2455.89	2452.24	6046.54	5617.98	6604.5	6100.95	5522.99	4877.41
NM_001005246	1615.75	1883.72	1710.63	1850.16	2131.89	2343.59	2368.11	2369.77	2307.45	2429.7	2651.16	7520.06	5772.48	7013.96	6671.42	5697.84	5336.52
NM_001005265	4042.39	2613.4	3292.42	2999.68	3144.48	2963.1	2656.08	2917.19	2919.2	3201.48	3274.27	8341.66	8340.93	7244.12	9460.43	10392.1	7520.86
NM_001005330	5996.69	4048.82	4823.82	4135.65	5125.51	4677.05	3750.1	4275.28	4192.91	4663.68	4276.19	10968	12564.1	9781.35	11877.2	14949.7	9896.49
NM_001005381	1531.03	1083.69	1420.31	1353.8	1328.72	1582.98	1231.91	1506.44	1470.16	1397.6	1495.83	4553.59	3822.86	4204.24	4570.33	4923.06	3948.27
NM_001005382	66.5077	112.566	86.0741	68.9803	96.5092	84.2679	75.5122	60.0362	77.834	62.9304	58.714	453.609	281.083	354.489	269.746	276.672	290.14
NM_001005383	2119.59	1575.06	2136.75	2263.07	1450.92	1533.37	1468.74	1364.4	1409.82	1482.39	1729.12	4613.38	4496.04	4349.41	4465.83	3502.01	5139.55
NM_001005384	163.328	139.699	115.398	114.935	159.288	174.139	219.381	147.351	188.331	180.126	230.037	655.974	536.846	532.916	538.03	798.008	531.223
NM_001005528	13490.4	13379.6	13539.2	13225.7	13323.6	13134.5	12374.9	10315.1	10968	11263.2	11976	29239.9	33614.5	32489.6	31390.2	30647.6	29387.6
NM_001005529	7950.22	6926.58	7239.08	7565.67	5941.43	6181.84	6035.18	6291.49	6284.71	5563.69	5702.01	12885.9	13320.9	14297.3	15732	13716.5	15896.5
NM_001005530	5658.19	3142.54	3360.37	3923.08	4120	3403.48	4072.8	4133.55	4505.65	4463.5	4345.33	18546.1	16404.2	14085.6	16765.6	23504.3	11473.9
NM_001005531	95.9485	156.746	98.6934	188.439	102.064	93.1085	114.54	124.399	112.193	126.247	147.094	313.136	226.294	412.9	224.272	230.982	354.805
NM_001005532	749.821	491.289	712.011	714.958	830.281	841.184	838.181	587.837	627.943	667.612	669.69	1368.36	1402.15	1567.81	1743.29	1482.65	1317.89
NM_001005533	4033.35	2797.58	3491.02	3205.45	3753.73	4129.68	3730.07	3247.25	3296.53	3687.15	3326.97	6798.86	7529.22	6913.13	7564.78	7854.81	6821.15
NM_001005534	11459.5	10493.9	11002.8	10180.7	10065.8	10380.3	9668.63	11125.5	11937	9487.7	11591.7	32560.7	32712.5	31126.7	32219.9	35731.2	30360.1
NM_001005535	1450.01	1043.95	1328.21	1369.97	1366.04	1594.05	1471.58	1283.95	1313.36	1197.37	1346.83	2843.6	2596.51	3211.42	2937.57	3093.64	2625.23
NM_001005536	1154.5	983.235	1196.86	1230.58	1187.95	1350.24	1086.43	1012.38	1199.17	1147.9	1166.55	2559.38	1873.05	2955.75	2889.28	2422.03	2467.92
NM_001005537	13252.9	11156.1	12392	12208.1	12064.1	13001.7	11136.7	10448.3	10541.6	10540.8	9951.07	24088.9	24789.6	22152.3	24665.6	22362.3	24263.3
NM_001005538	1989.83	2615.64	2174.49	2974.52	2224.25	2632.92	2928.14	2428.7	2909.9	2922.66	2911.82	6926.61	5901.55	7265.28	7570.35	6651.58	6877.31
NM_001005539	2597.16	1822.26	2406.33	2145.23	2014.51	2170.22	1542.25	1733.98	1896.71	2146.9	2057.5	5078.98	6444.95	5508.84	5424.82	6796.31	4605.21
NM_001005540	607.837	134.619	236.823	179.531	265.228	277.873	219.03	209.619	209.576	177.96	191.571	603.594	463.655	606.319	588.423	629.305	453.378
NM_001005541	3620.03	3181.89	3777.01	3782.63	3619.32	3980.05	3770.67	3496.91	3457.93	3249.26	3767.48	10666.8	10245.7	10487.6	9879.26	10263.8	10270.5
NM_001005542	520.859	325.192	465.296	372.539	348.138	298.682	314.071	357.921	373.899	339.865	425.181	1190.87	875.242	1015.19	1300.26	1239.31	844.764
NM_001005543	581.577	515.253	622.135	637.121	600.901	585.151	551.602	596.402	477.124	741.592	550.893	1457.18	1572.56	1631.24	1791.79	1392.36	1350.88
NM_001005544	523.82	244.849	545.627	356.675	411.853	425.039	415.771	416.848	508.544	412.538	492.163	1094.23	1917.34	1292.11	1325.18	1491.67	909.066
NM_001005545	1601.78	1330.37	1618.68	1727.88	1656.32	1900.8	1704.32	1418.83	1740.22	1475.39	1755.06	3865.93	3107.38	4637.29	4067.87	3917.01	4636.98
NM_001005546	25.5406	30.9083	32.9237	33.5554	40.3632	22.6412	26.4556	26.2559	23.9835	22.1891	18.3998	251.093	219.547	303.07	267.59	253.103	248.372
NM_001005547	17037	15230.5	16069.8	15061.5	12460.1	11637	12787.8	14398.1	13960	13516.2	15300.9	35386.3	36276	32269	32901.5	39322.5	30418.4
NM_001005548	7606.31	6047.75	6559.69	6482.44	4859.61	5505.58	5958.8	5912.86	5092.83	5756.91	5639.24	15185.2	14344.2	14131.8	13832	14190.4	14348.7
NM_001005549	23.5321	22.0983	23.1366	50.8248	24.6921	30.2861	23.9583	26.91	27.5385	20.5325	22.2361	124.919	81.3916	80.7748	123.316	95.1202	89.843
NM_001005550	14706.5	13882.4	13983.3	15630.5	12575.8	14320	14428.7	12907.9	12300.8	11251.5	12367	33229.1	30239.1	29578.2	31753.1	30291.8	28441.8
NM_001005551	1008.9	773.631	773.461	1045.33	778.182	697.454	704.706	642.113	734.87	717.445	647.31	1768.39	2022.96	2035.67	2449.12	2007.6	1665.82
NM_001005552	1056.87	826.965	937.8	963.081	1121.46	1187.71	1029.32	916.141	989.034	1035.37	1140.4	2569.34	2403.93	2746.42	2832.26	2793.43	2496.61
NM_001005553	4418.99	4179.76	4802.57	4077.35	5108.19	4769.62	4206.67	4109.47	4254.66	5456.75	4473.54	13511.6	13994.3	13926	12287.8	14515.7	13625.5
NM_001005554	12583.5	10176.2	11292.5	10535.2	10681.7	10909	11184.5	11025	9384.53	10492.5	10118	23923.8	22073.9	20691.6	21449.7	23072	20934.4
NM_001005555	3781.12	3513.12	3747.69	4110.6	4125.12	4568.14	4432.78	4441.88	4423.8	4209.71	4322.38	11687.4	8519.86	10716.6	9587.51	9576.98	10922.1
NM_001005556	2232.32	1931.22	1931.75	1859.21	1385.24	1291.82	1583.74	1879.83	1777.09	1677.59	1687.01	5166.08	4481.13	4270.09	4963.53	5529.79	4152.72
NM_001005557	42.6346	33.4669	44.2002	57.6245	72.4989	66.757	63.91	55.938	58.7018	54.4849	80.6638	91.0239	86.3659	115.032	203.055	116.773	98.102
NM_001005558	751.262	540.268	835.809	709.745	507.843	466.47	484.302	614.839	640.008	701.34	711.974	2572.37	2283.86	2673.26	2592.21	2341.98	2607.93
NM_001005559	104.541	301.181	134.269	150.486	109.096	126.591	133.764	167.281	114.16	136.568	135.684	273.425	350.078	334.527	191.95	277.642	374.718
NM_001005560	1913.94	1991.66	2014.97	1748.73	1809.43	1926.13	1939.93	1949.27	2124.42	2001.68	1988	6854.5	5544.32	6286.59	7218.63	6134.14	6162.22
NM_001005561	3226.29	2916.98	3573.59	3203.13	3283.36	3157.05	3374.28	2650.87	2837.49	2941.26	3227.84	7602.77	6936.07	8207.21	8537.06	8550.45	7801.85
NM_001005562	3148.16	1751.07	2298.76	1597.15	2494.97	2776	2398.17	1573.91	2135.21	3279.47	3454.11	7813.16	8514.07	9533.86	9816.28	18230.1	5812.77
NM_001005563	929.441	778.252	919.852	894.323	814.496	837.445	727.862	768.783	777.266	751.317	969.153	3445.9	3545.05	3907.14	3704.11	3386.39	2909.79
NM_001005564	4162.27	3597.04	3595.3	3723.1	3645.95	3717.1	4001	3449	4020.01	3346.49	3844.76	10983.8	9385.65	10752.4	11795.7	11452.1	10288.1
NM_001005565	1151.84	1521.28	1220.81	1209.7	1187.14	1363.84	1500.07	1943.71	1549.82	1157.56	1564.53	3839.03	2747.69	3494.52	3680.7	2769.08	2550.53
NM_001005761	8682.78	7576.17	8456.21	8850.46	8286.69	9008.86	9255.56	8644.04	7968.98	7223.69	7964.43	21358.7	17724	19518.8	21210.6	19817.1	19480.8
NM_001005762	2428.96	2050.09	1851.22	2480.69	1953.51	2007.08	2193.81	2145.22	1980.92	2344.1	2029.99	5466.85	7260.86	5870.17	5873.76	6769.13	4982.88
NM_001005765	5047.61	3813.35	4268.82	3934.7	4526.73	4804.49	4556.12	4087.72	4645.94	5421.52	4305.31	8882.18	12106	10344.2	10966.8	8958.82	10159.9
NM_001005871	1666.15	3220.2	1205.98	7084.39	446.816	517.987	2853.2	4243.52	2424.94	1318.05	1540.42	7641.09	7104.18	2662.16	3062.12	2992.11	10999.4
NM_001005872	6272.9	5766.23	6303.59	6064.61	6695.95	6666.09	6634.63	5964.13	5906.68	5818.26	6263	13432.2	12953.1	13765.1	14413	13166	14672.1
NM_001005873	5065.76	3961.43	4341.77	4399.57	4511.87	4688.07	4385.61	4140.78	4030.11	4287.35	4114.09	11679.6	11083.1	11542.1	12924.2	12871.9	10603.6
NM_001005875	6124.44	5473.57	5842.08	6044.04	5220.74	6219.47	5656.56	5258.65	5752.32	5208.34	6109.36	15113.2	12615.2	15336.9	15288.5	13347.5	14893.6
NM_001005876	9800.96	11961.6	11152.9	10423.1	11884.8	13215.5	10845.6	11570.5	14134.8	12213.8	13682	35453	28993	40241.4	37933.6	39324.8	34387
NM_001005877	28.7242	27.8841	29.8207	24.0486	28.9284	24.5091	31.0917	22.2414	27.9791	21.7861	22.2652	134.786	90.8194	88.5817	201.069	109	133.452
NM_001005878	235.702	105.636	190.213	166.788	204.099	192.73	128.65	144.292	190.535	222.239	253.483	535.799	492.194	617.166	542.671	566.957	513.866
NM_001005879	1256.28	1146.71	964.284	1293.83	1022.32	1098.53	1491.53	1583.99	1371.1	2058.57	1519.13	4268.61	4281.27	4536.03	4149.15	4516.65	3916.56
NM_001005880	22.1275	23.9825	18.7681	19.8341	21.995	18.4289	15.7351	17.6655	16.0308	16.8761	20.2507	151	151.796	206.069	386.807	173.511	143.592
NM_001005881	3610.66	6470.84	4160.04	4568.24	5040.76	6919.03	8574.6	9166.22	9563.31	8535.32	7764.93	34072	25746.9	31332.9	32519.2	29788.4	27854.1
NM_001005882	2242.99	188.047	390.522	179.951	239.693	247.864	251.233	174.33	184.975	250.425	415.286	5858.33	4008.23	711.137	4141.14	11709.2	555.74
NM_001005883	432.372	280.551	262.732	276.993	380.284	385.495	345.093	357.504	332.294	342.456	358.15	942.466	678.622	775.024	930.125	954.714	708.605
NM_001005884	10676.6	10100.5	10111	10060.2	11480.1	11859.7	12045.8	12473.4	11943.5	11848.5	12988.1	34030.4	29571.4	30050.7	35080.4	30231.7	30645
NM_001005885	638.291	439.808	1003.01	455.302	1300.29	1263.84	597.658	503.271	766.62	1148.93	954.532	2626.46	2544.64	3453.48	2724.87	3319.22	2618.25
NM_001005886	795.988	1211.31	891.59	855.718	707.766	1145.96	1601.49	1632.54	1838.94	3143.52	2146.74	10152.5	9829.83	13015.3	11358.2	9369.09	9806.7
NM_001005887	4753.21	3499.5	4253.11	4108.15	4581.05	4954.96	4405.53	4938.7	4834.74	6295.01	5118.44	11853.3	13382.2	12679.8	11982.4	10864.3	13181.9
NM_001005888	2641.53	1717.1	2074.91	2078.74	1930.92	1869.1	2138.16	2066.33	2002	2818.96	2143.09	6538.28	6848.26	4802.06	5543.49	6598.43	4791.6
NM_001005889	7235.36	6525.29	6976.76	6350.85	8042.44	8142.73	8014.23	7303.11	6885.34	7691.3	6581.21	15193.8	16606	16791	15954.7	14465	16421.7
NM_001005890	202.366	110.007	165.306	166.795	213.717	204.554	204.876	199.392	203.395	193.249	307.551	655.299	747.299	633.561	879.551	965.287	583.995
NM_001005891	337.219	203.28	215.262	293.748	242.473	224.04	210.339	215.728	215.866	199.129	280.668	653.445	784.457	647.641	806.017	714.353	676.908
NM_001005892	463.353	440.669	459.163	494.37	517.718	564.31	419.816	382.072	453.28	392.622	471.151	1141.03	1012.26	1273.61	1637.28	1136.97	997.414
NM_001005893	161.918	552.295	455.125	683.299	98.4558	410.101	344.031	159.14	812.597	1320.94	799.802	1295.99	1061.88	1434.75	1312.16	1269.35	2369.86
NM_001005896	20.2306	19.0385	21.1501	18.8142	21.1455	21.3881	26.3231	20.5078	22.3773	18.9521	20.6294	48.8009	74.1985	71.403	47.8342	61.9648	54.8355
NM_001005897	23.9774	24.6682	25.1417	25.6259	17.6642	19.4825	16.8076	22.5672	24.0056	19.3349	19.1282	56.1923	64.5268	60.1025	59.0376	62.1821	63.5964
NM_001005898	7370.63	7380.21	7051.72	8330.66	7914.98	7683.18	7301.81	7516.54	6585.31	8041.03	6503.35	14571	17149.6	15786.1	14817.2	14346.8	16571.6
NM_001005899	52.4004	26.4758	36.595	31.3588	21.1505	29.8381	19.8632	21.1905	31.8268	33.9208	60.9749	89.4485	121.639	78.0631	77.28	123.441	77.6992
NM_001005900	63.0542	31.9346	56.8554	62.256	69.7192	76.9586	70.1091	50.8579	61.9087	54.4774	65.7979	177.644	154.662	253.959	242.377	271.257	193
NM_001005902	1703.73	1132.6	1509.95	1397.93	1278.9	1327.52	1347.25	1234.22	1315.04	1274.8	1343.8	3152.87	2972.24	3042.87	3314.88	3337.77	3482.21
NM_001005903	23101.1	22921.8	23834.1	24402.9	24102.3	23876.2	23382.9	24897.9	26066.9	24282.9	24046	47228.6	45038.4	45555.2	46460	47022.3	41967.9
NM_001005904	59.3235	118.127	58.9172	88.1764	56.0983	62.2114	45.1354	57.9749	67.6365	57.2204	37.3591	241.232	176.902	175.093	186.164	221.797	233.134
NM_001005905	14515.4	12232.9	13942.9	12515.1	13188.5	12940.5	13822.8	12111.9	11532.8	11025.6	12526.3	27877.8	26467.5	27267.3	26706.1	29871	28124.2
NM_001005906	2856.33	2265.53	3412.78	2243.73	3122.82	2673.03	2909.3	2638.94	2921.46	3001.91	3252.71	8875.74	5883.51	8346.65	9826.87	9212.29	9125.28
NM_001005907	2879.06	1904.1	2655.43	2411.72	3224.32	2517.7	2267.84	2127.73	2059.16	2356.94	3050.25	6825.54	9085.39	7221.18	7945.79	10188	6646.09
NM_001005908	13038.2	12248.3	11820.1	14128.5	11979.8	11639.1	13667.5	16149.4	14252.1	14533	11340.7	35787.2	33802.4	33396.9	32122.2	33692.6	32785.9
NM_001006595	64.1874	132.327	94.7565	101.203	132.047	117.24	102.675	79.505	84.3245	108.58	100.609	316.452	415.068	502.6	449.289	669.52	539.764
NM_001006596	16.4836	27.2002	24.8012	21.9709	25.601	23.4934	19.0086	17.4875	25.3952	27.5469	26.7837	136.335	147.117	330.913	105.287	133.774	168.352
NM_001006597	80.2354	110.122	107.573	136.327	81.6341	77.404	69.9305	82.2753	100.382	162.421	109.729	337.721	322.092	477.987	248.562	295.989	496.743
NM_001006598	56.1235	133.584	90.8544	90.4279	71.1944	63.0587	71.5484	84.0328	82.7648	94.227	72.8495	286.858	457.239	288.026	230.396	266.07	410.317
NM_001006599	15.1465	18.2869	18.776	18.1789	21.8646	20.0402	22.3601	25.1727	19.3683	22.9051	19.8121	97.8913	177.977	110.13	131.047	118.915	171.661
NM_001006602	3003.29	2113.19	2612.69	2478.5	2628.38	2776.59	3026.22	2774.14	2632.51	2393.43	2718.21	9234.08	7276.42	7369.3	9210.78	11147.9	7446.57
NM_001006609	17.8896	36.6041	25.9136	28.0667	22.1491	23.0283	18.8715	23.0169	16.6546	23.8318	24.8005	114.224	174.986	140.641	134.975	120.575	162.754
NM_001006954	3579.24	3398.67	3544.05	3687.01	3458.86	3695.7	3446.48	3179.26	3072.16	2878.7	3135.52	8955.82	8035.21	8329.58	8847.15	8424.37	7194.31
NM_001006955	6548.95	6703.76	6338.72	6976.72	5869.09	5694.84	6251.4	7884.78	7002.9	8591.58	7570.25	17865.8	21549.4	19595.5	20107.2	19266	19963.7
NM_001006956	1101.65	878.754	970.573	1405.14	854.393	818.648	1117.04	1244.12	1145.23	1222.34	1108.25	2035.08	1170.07	1957.57	2156.78	2013.85	1452.08
NM_001006957	8866.09	10287	8696.79	10191	8115.85	10023.5	10862.4	10361.9	10302.7	10430.2	9230.13	22708.9	24027.5	24543.4	24194	22694.8	21611.7
NM_001006958	1286	1202.34	1287.64	1307.87	1170.23	1278.51	1333.63	1445.51	1382.18	1378.86	1285.46	3041.78	2384.64	2894.18	3206.58	2857.54	2749.74
NM_001006959	1593.75	1490.5	1734.1	1877.88	1981.86	2089.29	1966.43	1672.55	1849.4	1641.8	1875.79	4149.82	3087	4556.03	4270.3	3574.92	3937.12
NM_001006960	769.168	1054.85	694.756	1392.47	721.695	728.429	1185.12	1049.6	1032.39	567.245	841.946	2770.53	1161.42	1522.65	2025.22	1592.62	3217.23
NM_001006961	39.4305	24.9702	35.6625	42.2593	56.8056	54.3415	46.6134	31.596	35.5809	40.4917	26.2737	173.755	172.882	318.092	140.81	140.727	133.452
NM_001006962	1961.82	1542.09	1904.55	1912.06	1877.54	1795.27	1591.84	1589.21	1621.8	1724.2	1681.42	4389.98	4562.08	4654.71	4920.35	4634.28	4825.85
NM_001006963	39535.7	39221.4	35376.7	37950.4	41944	41337.8	41774.8	38579.2	37684	38093.8	38435.8	54893.7	55007.7	54170.3	56211.4	55407.7	53835
NM_001006964	18389.6	16403.8	16787.9	17966.2	16470.3	17611.9	18205.4	15744	17713	15618	17006.8	37629.3	39566.2	39460.7	40470.6	43771.2	42389.1
NM_001006965	1290.18	1102.06	1383.52	1130.53	1503.16	1551.83	1318.39	1137.46	1432.94	1230.86	1667.52	4418.05	2898.4	5117.46	4853.87	4503.57	4145.73
NM_001006966	4050.19	3264.39	3559.25	2982.89	3281.94	3585.56	3082.9	2943.74	2536.93	2624.74	2665.75	6956.46	7400.73	6934.77	7557.17	8048.77	6876.46
NM_001006967	7314.97	6859.14	7506.56	6542.15	7380.58	6900.1	7172.59	6630.14	6918.3	6666.16	6486.02	18393.7	17845.4	17589.6	19216.5	16564.4	18158
NM_001006968	4643.69	3807.27	3586.09	4036.05	4203.1	3559.61	4519.13	4109.28	4468.94	3000.53	4353.42	10985.3	11684	10874.6	10774.1	13900.2	13130.8
NM_001006969	3393.49	2522.16	3439.68	2861.11	3717.26	3245.87	2597.32	2562.3	2337.15	2731.31	2934.89	7946.4	10008	8341.63	10336.1	9509.07	9223.45
NM_001006970	13427	12880.2	12823.7	12983.9	12313.5	12932.1	13101.2	12108	12055.9	10881.9	12396.2	24350.2	25099.1	24876.9	27411.9	26394.7	26467.5
NM_001006971	3212.53	3180.99	2971.03	3083.52	3653.32	3373.19	3379.39	3175.17	3490.05	3306.02	3158.77	9870.97	9121.8	8787.13	10160.4	9615.38	10243.8
NM_001006972	11690	11389.3	10980.2	12213.8	11585.2	12647.4	12917.2	12042.8	12657.4	10569.3	13554.2	32942.8	27934.1	31560.2	30264.8	32685.1	28462.4
NM_001006973	14372	13902.6	15455.1	14576.3	14207.1	14066.8	13163	11136.8	11199.9	12092.1	13339.2	29837.5	27979.7	31120.8	29551.4	28208.2	26403
NM_001006974	1518.65	1390.1	1592.04	1448.64	1529.15	1481.63	1181.52	1349.74	1436.24	1270.06	1591.56	3738.66	3043.84	4149.65	3869.66	3821.07	3621.96
NM_001006975	405.7	305.41	362.717	380.373	428.937	529.176	368.463	286.114	242.764	307.942	472.834	706.058	1037.5	631.298	971.967	972.934	789.746
NM_001006976	3691.35	3091.44	3715	3717.6	3289.64	3351.43	3667.73	3623.53	3467.34	3239.98	3400.42	10283.1	7052.74	7863.31	9068.59	9567.1	8997.84
NM_001006977	19.8153	15.4173	19.831	18.8878	13.3721	12.5602	15.2237	11.6904	15.51	13.4769	12.8906	88.3832	86.5274	79.7341	141.987	150.591	86.294
NM_001006978	10197.3	8740.81	9231.66	8814.62	8795.96	9949.52	8958.05	9548.53	9346.3	9651.91	9098.37	24040	20575.7	22229.8	24578.1	28429.8	22948.2
NM_001006979	31.5238	26.4196	35.3604	24.2052	28.4331	44.0999	30.1241	38.0639	32.1962	36.2802	32.6581	114.969	107.336	125.758	139.3	99.2109	114.447
NM_001006980	2335.2	1986.94	2326.45	2222.24	1803.23	1917.81	2091.83	2034.95	1654.4	1674.26	1847.64	4681.26	3973.25	4680	5109.46	4041.7	4929.94
NM_001006981	12033.7	10767.7	9852.75	12831.6	7448.24	7587	8051.56	11205.5	10287.2	9652.8	10714.7	27156.6	23862.1	22658.8	25456	26764.4	28884.8
NM_001006982	7303.44	5785.1	7311.67	5200.64	7110.87	7105.7	5875	4714.5	5443.4	6080.27	5746.63	12601.4	14309.6	14363.9	13212.5	12827.8	12062.5
NM_001006983	2298.73	2380.92	2382.95	2448.72	3289.08	3294.81	2629.5	2362.76	2813.43	2315.5	2966.27	8627.11	6752.66	9606.41	8453.86	8032.89	8299.19
NM_001006984	3316.09	3349.72	3623.79	3711.92	4185.63	4129.68	3951.19	3489.38	3780.69	3331.47	3691.92	9244.22	9025.53	9705.1	10085.5	8987.33	8737.8
NM_001006985	4406.84	3632.53	4025.75	3915.14	4004.47	3942.84	4126.61	3513.24	3851.79	3315.35	3782.74	9692.08	8560.75	9556.64	10585.7	10647.4	10082.8
NM_001006986	5841.23	5556.45	5588.93	5882.49	5255.6	6382.42	5983.08	5641.59	5714.59	5270.2	5829.56	15208.4	13782.9	14827	15346.2	15683.8	15618.5
NM_001006987	4093.11	3147.77	3727.59	3619.1	4791.44	4861.71	3990.06	3893.92	4218.14	4715.72	4360.88	8568.04	8903.24	8908.95	9404.06	10515.4	8299.88
NM_001006989	8995.43	7843.94	7659.31	8298.84	7801.16	7828.35	7935.43	7948.26	7264.35	8493.85	8533.91	22335.6	24366.4	17816.8	24595	23711.3	21576.9
NM_001006990	66.4742	69.9643	71.104	61.2274	79.3064	88.96	66.9671	59.765	57.0498	70.6662	78.2088	190.32	189.2	306.606	172.298	305.016	208.339
NM_001006991	6227.1	6341.43	6850.07	6621.26	6967.71	6650.86	6046.88	5452.1	5845.97	5262.47	5365.85	17537	15289.9	17092.7	18465	17591.6	18908.5
NM_001006992	418.378	382.195	491.24	362.931	490.534	419.879	288.426	315.545	331.668	357.926	380.332	965.118	1176.7	998.377	972.353	750.835	1053.77
NM_001006993	549.247	145.469	597.493	62.6051	211.19	207.81	246.11	243.393	165.99	175.087	276.323	312.535	1065.29	482.673	314.682	307.649	222.139
NM_001006994	1919.61	1264.53	1538.54	1789.58	1829.7	1985.34	2271.16	2442.71	2383.94	2272.92	2307.89	6579.95	5617.86	6403.39	5883.88	6559.86	5943.87
NM_001006995	4021.42	4189	4171.65	4217.73	4422.49	4807.52	4123.02	4205.54	4487.09	3931.08	4273.27	12540.1	9560.35	12134.5	13106.5	10923.6	11764.3
NM_001006996	1191.16	943.957	1073.64	978.33	1137.95	1174.62	1099.28	962.143	1033.27	1058.23	1084.15	2789.15	2439.39	2299.15	2463.68	2668.58	2484.06
NM_001006997	6322.05	4768.87	6241.69	5114.17	5851.58	5944.28	5841.32	5268.92	5500.33	5515.62	6185.08	18602	16949.6	17123.8	17685.3	22649.4	16592.6
NM_001006998	244.25	140.756	211.328	177.249	305.755	240.271	238.955	252.023	320.983	191.876	282.39	704.947	879.283	953.324	965.648	817.139	805.881
NM_001006999	1991.07	2019.13	2046.87	2161.37	2255.19	2205.83	2240.11	2149.99	2264.45	1977.92	2414.62	5199.97	3792.31	5605.5	6041.92	4803.26	4337.81
NM_001007000	2708.73	2187.66	2886.35	2437.12	3010.38	3323.34	2759.1	2211.11	2420.46	2338.4	2599.1	6022.08	6131.7	6642.32	6371.06	7039.07	5538.88
NM_001007001	2362.55	1631.1	2369.83	2119.35	1989.29	2095.83	2009.47	1769.86	1707.2	1473.94	1450.62	3588.19	3712.28	3937.78	4391.14	4782.41	3587.16
NM_001007002	1153.79	585.748	872.626	745.534	697.932	579.908	661.004	669.535	716.393	532.847	917.965	2299.05	2961.72	1468.56	2327.02	3029.98	1578.58
NM_001007003	6042.76	5522.92	6087.36	6057.2	5845.54	5881.83	6003.69	5900.84	5320.51	5137.78	5362.56	12104.6	12976.7	11533	13537	13306.2	12376.5
NM_001007004	17403.6	17372.8	18803.2	18653.3	20798.4	21128.9	18634.3	19410.2	21298.9	20899.4	21395.4	43223.6	40435.4	50781.9	45583	46014.4	46315.7
NM_001007005	12871.1	16579.8	13008.9	17491	9152.48	9472.71	14279.9	15009	15208.4	16233.6	13828.4	44215	42797.7	44452	43144.9	41373.5	35901
NM_001007006	80.2437	112.019	132.386	105.703	94.9155	75.4507	96.5475	58.8727	83.2687	66.3551	64.4903	336.296	370.233	304.64	312.122	240.727	357.415
NM_001007007	2172.68	1262.82	1581.62	1615.38	1884.19	1985.02	1618.5	1635.07	1976.52	1889.61	1914.54	4435.45	4905.32	5703.58	6161.35	6402.68	4411.94
NM_001007008	6788.64	6710.7	7339.85	6547.92	7678.25	7098.31	6942.14	5305.51	6544.1	5400.41	7937.36	22008.1	18147.5	23912.4	25571.1	22571.7	20159
NM_001007009	2544.08	1379.17	1892.27	1438.33	1593.52	1393.83	1525.02	1604.27	1315.51	1010.13	1302.68	6596.05	7308.76	4807.83	5826.37	9587.54	3428.94
NM_001007010	465.164	360.698	414.072	277.225	337.788	368.341	377.786	301.586	289.008	213.083	317.027	768.16	864.419	785.57	799.793	862.576	558.365
NM_001007011	78.1101	39.5368	78.1761	78.7099	67.5584	59.4466	55.2374	46.9268	50.6926	63.2751	78.4014	164.093	128.207	136.043	227.845	199.816	104.687
NM_001007012	301.118	83.3567	154.501	84.9142	135.271	114.178	117.254	124.76	118.665	140.952	263.078	407.072	731.28	441.344	473.317	1004.75	597.949
NM_001007013	49.1705	214.51	111.658	85.2108	59.6067	68.0118	51.7972	73.1259	65.9315	105.08	96.6182	179.172	234.096	131.067	177.867	160.239	367.973
NM_001007014	3670.18	2652.92	3315.25	2962.98	2713.68	2593	2785.58	2434.3	2342.93	2515.96	2405.13	6371.24	7013.49	5745.68	5819.05	5994.82	5852.82
NM_001007015	135.297	314.141	212.293	192.75	166.901	158.609	164.886	143.235	144.077	204.592	215.59	310.3	448.2	236.289	214.385	232.995	393.463
NM_001007016	49.3795	67.6071	76.1641	35.491	51.7906	56.8322	46.1216	36.7136	45.0846	31.5563	26.4383	189.66	195.278	180.861	183.794	208.625	177.814
NM_001007020	5763.58	4763.06	5439.62	5457.58	5685.21	5416.7	4901.74	4090.45	4356.98	4613.52	4624.32	10694.1	13762.2	11914.5	12540.6	11845.6	12179.2
NM_001007093	46.54	49.3566	60.4846	44.6479	56.9157	32.7227	51.2846	38.9186	41.685	30.3252	39.4477	160.17	156.126	175.251	197.976	188.752	156.417
NM_001007144	4061.04	2759.45	3539.68	3342.75	3090.21	2651.62	3016.17	2635.87	2668.76	2566.65	3224.18	6806.24	8122.57	6378.85	6809.66	7539	5397.57
NM_001007145	8845.13	6516.71	7805.28	7202.61	6410.57	6795.36	6833.84	6256.66	5574.95	6671.19	6438.49	15926.6	19639	15854	17600	20671.9	14654.5
NM_001007146	3539.14	4224.87	3307.12	3899.41	4324.62	3593.05	4761.72	4035.05	4326.58	3921.62	5027.1	13933.4	9844.38	11550.7	10787.7	10666.6	10896.5
NM_001007147	4089.2	3608.22	4417.78	4638.32	4506.92	4305.7	3944.31	3882.89	3919.76	4208.46	4518.43	9756.61	9279.02	11120.4	9822.4	10656.9	9931.7
NM_001007148	3556.31	3669.68	3608.43	4297.23	3097.02	3163.2	3880.68	4447.46	3958.55	4633.34	4016.76	13686	11991.3	11788.9	13116.8	13241	14331.7
NM_001007149	8886.97	8817.48	8574.8	11039.8	10003.8	10265.6	10135.9	9617.69	9688.5	8478.35	9771.77	31479.5	19591.1	26241.3	25941.4	28726.2	28232.7
NM_001007150	12426.7	12179.7	11758.6	13954.1	12565.2	11401.2	12038.7	12230.6	12128.8	11800.2	10846.4	29951.1	26830.4	27229.4	30975.4	27371.4	29634.8
NM_001007235	12900.9	10718.1	13241.3	10580.4	17894.1	15697.2	13384.9	12801.9	12043.3	16052.7	15385.9	32195	33071.5	35025.8	35528.6	33567.9	24152.6
NM_001007264	23.8525	59.8712	38.2478	34.5904	33.1608	35.6835	30.9883	26.5698	30.2628	33.5885	33.3667	96.0617	111.138	154.16	77.2152	75.8333	134.698
NM_001007265	12800.2	13557.6	13205.4	15144.7	14477.1	14380.5	15265.7	16989.3	16439.3	17154.9	17319.5	42246.8	39933.1	38373	40463.2	45000.8	43825
NM_001007554	90.3972	52.714	38.4375	117.636	40.9843	42.9945	32.8752	33.6266	27.2788	33.5888	97.1368	78.6848	182.336	76.3099	111.075	187.894	119.47
NM_001007556	27.25	36.032	26.4105	30.1666	46.0051	45.6598	47.9431	37.0997	34.4705	26.225	21.1463	155.113	411.086	176.315	199.068	128.722	186.259
NM_001007557	1416.69	1226.18	1278.04	1273.43	1002.26	1059.3	1026.35	1176.83	953.037	1489.36	1226.08	4200.71	3583.04	2741.54	3316.74	3437.25	3471.08
NM_001007558	21.7553	16.2554	14.4827	19.0024	21.2929	23.2435	14.7863	16.458	16.5066	15.7152	23.9542	59.3193	51.3193	62.0313	106.694	101.723	57.6944
NM_001007597	42.3501	55.92	29.6936	62.0728	52.5172	50.3137	37.4056	32.5676	44.7497	45.6834	39.5037	75.5797	81.4544	83.8612	119.005	72.5181	104.609
NM_001007598	11399.6	10450.9	10913.2	10813.8	11515.1	11698.8	10147.1	9142.49	9858.84	8523.22	10412.9	28615	27087.3	28916.1	26205.7	25666.8	26467.2
NM_001007599	17481	19252.9	20037	17345.7	18789.5	18896.3	16954.5	14650.2	15413.2	14419	15230.7	40049.6	41399.8	40619.8	40795.7	39185.4	40269.7
NM_001007600	20960.1	18300.5	20051.8	17535.1	20158.6	18212.8	19394.6	16306	16478.6	16864	17626.6	43603.6	41519.2	42299	38435.2	37617	43056.4
NM_001007601	3402.28	1336.51	2808.66	931.85	1244.85	1623.75	1700.51	1653.78	1623.74	821.396	1476.2	4423.28	3594.58	3909.22	4016.92	2777.26	2097.72
NM_001007602	9846.39	7164.45	9029.44	7508.15	10849.5	10319.2	8767.45	7289.02	9224.49	9310.54	10185.1	18523.2	19324.9	24438.5	22273.2	24325.4	19014.2
NM_001007603	13566.1	12054.3	12752.6	11618	13235.4	12430.4	10766	10572.9	11894.2	11337.9	12526.3	29340.4	31653.4	30239.6	27709.6	30312.5	27011.9
NM_001007604	12999.8	12206.1	12854.2	11103.7	16500.2	15404.4	13380.7	11001.5	12355.4	11404.1	13339.1	32305.8	33452.6	32254.2	32358.3	31970.4	31177.5
NM_001007605	247.745	1031.81	475.136	458.531	376.983	324.723	350.163	305.551	298.784	432.393	314.476	1000.25	1078.81	532.315	663.062	662.581	1267.94
NM_001007606	15434.9	15031.7	15501.6	16649.8	14586.7	14707.8	12924.6	14947.5	15504.3	14414	15998.3	36653.4	31741	32093.9	33551.3	34177.9	34132.7
NM_001007607	8080.43	6674.03	8168.41	7135.28	7795.99	8395.89	8188.43	8789.49	8494.38	8936.83	9155.03	25388	22138	23754.8	23403.6	23585.2	21906.4
NM_001007608	15093.3	15264.2	13982	14770.4	14251.7	16490.8	14214.6	14629.3	14187	13537.5	12439	35065.9	36410.7	34806.6	36137.9	36062.1	35804.5
NM_001007609	3712.47	2752.78	2968.97	2609.32	3094.03	2961.45	2928.53	2649.7	3118.12	3881.3	3418.85	5299.63	6569.52	6751.64	6389.44	5872.63	6216.76
NM_001007610	1771.32	1469	1710.28	1619.21	1801.71	1985.26	1723.97	1690.59	1694.93	1555.81	1664.72	4629.16	3583.5	4225.08	5089.66	4972.87	3929.65
NM_001007611	631.922	325.68	442.841	250.805	648.552	554.806	404.7	318.759	472.087	332.512	375.54	1621.29	1058.52	1257.8	1525.89	1622.59	1113.21
NM_001007612	245.896	57.4573	69.6917	53.021	61.2422	68.9265	48.3192	36.9571	41.9211	45.1463	62.3315	189.697	244.9	217.435	210.155	481.027	188.31
NM_001007613	13453.7	13037.5	13666.3	14411.8	13317.7	14207.6	13174.5	13171.4	12398	13365.9	13825.4	34416.1	32180.5	31576.2	33089	30892.7	33312.6
NM_001007615	1981.76	2143.77	2097.38	2352.25	2717.08	2950.03	3080.64	2835	3019.71	4656.96	3441.36	14970.8	12051.6	10978.8	9826.27	8940.36	14449.8
NM_001007616	14126.9	16933.7	14815.2	16670.8	17154.3	17410.8	16979.8	15635.3	16333.7	14698	17758.6	43140.6	38217.3	43948.1	45218.9	43451.8	40657.3
NM_001007617	1127.48	642.506	928.766	696.624	521.897	549.108	516.403	510.615	488.61	751.775	597.886	1612.15	2121.11	1663.62	2047.25	2275.12	1592.46
NM_001007618	1337.85	1042.89	1248.11	1085.46	1149.81	1244.43	1359.43	1121.5	1080.9	1360.62	1291.14	4118.69	3264.09	4115.1	3987.93	3917.77	4021.66
NM_001007619	1001.25	1050.66	1168.07	861.356	1226.68	1344.16	964.662	555.138	738.592	1045.8	818.902	2009.02	2636.27	2853.81	3778.11	3217.15	1635.91
NM_001007620	9652.99	8893.31	9380.86	9373.63	9153.75	9192.25	9506.68	8347.38	8262.34	7566.18	8507.49	23908.1	22498.3	23254.4	24404.9	23769.4	21938.4
NM_001007621	4366.84	3140.77	3724.17	3739.95	3310.61	2784.17	2690.3	2565.4	2655.05	3897.66	2780.07	10748.1	12740	12699.7	10037.4	14666.1	13910.8
NM_001007622	642.461	68.5803	132.064	101.277	105.655	80.3916	91.0875	70.2352	93.4084	120.241	237.314	1332.77	1471.83	446.93	1689.36	4177.57	446.442
NM_001007623	2933.65	2690.1	3060.35	2718.27	3407.74	3299.08	3000.57	2652.21	2944.33	3101.8	2829.59	6686.2	5995.67	6258.4	6953.61	6496.76	6281.12
NM_001007624	6769.73	5955.18	6292.32	6500.94	6716.3	7126.2	6685.97	7054.81	7451.38	7426.6	7495.36	19642.8	20625.1	20746.3	19495.5	24063.3	18458.7
NM_001007625	5258.7	5787.83	5946.84	5914.67	6381.42	7491.33	7749.18	7578.17	8049.07	5995.65	7620.73	18738.5	15051.6	17290.3	18292.3	16289	15373.5
NM_001007626	540.319	424.339	421.417	556.364	480.81	436.281	379.872	498.961	522.61	632.667	491.138	1507.85	1261.48	1760.35	1587.56	1329.25	1390.94
NM_001007627	911.203	563.056	940.704	930.19	1124.66	1165.76	812.074	760.54	849.612	679.889	913.045	2406.71	2370.34	2386.15	2479.56	2040.66	1663.44
NM_001007628	3909.07	3368.62	3346.37	3228.08	2825.27	3034.91	2753.76	3206.34	3458.97	2843.42	3391.59	11170.3	11407.4	11950.7	12020.6	13272.6	12353.6
NM_001007629	4332.79	4500.12	3915.78	4781.79	3855.18	4028.17	3424.62	4521.98	4478.91	4130.88	4743.17	9342.56	7916.52	10474.4	9099.69	10514.2	9768.7
NM_001007630	6235.53	4386.76	5492.16	4338.48	6419.6	6133.74	5350.67	5312.75	5399.01	6452.36	6078.22	16884.5	17728.2	17098.6	18771	20035.1	18004.5
NM_001007632	3156.09	2464.21	3050.87	2595.57	2481.09	2471.87	2072.34	2461.34	2491.86	2393.73	2587.39	6331.74	5862.78	5531.73	6740.06	6759.51	6116.57
NM_001007633	5497.73	4788.71	5626.14	5246.67	5598.61	5912.12	5419.66	5095.92	4764.88	5033.11	5134.31	16618.8	13944.6	16143.6	17275	17096.5	15324.3
NM_001007634	2645.19	2403.67	2653.95	2634.83	2860.77	3025.48	2791.62	2289.11	2640.77	2067.55	2840.16	5693.43	4723.86	5793.55	5998.06	6386.64	5244.72
NM_001007635	24.6044	13.9029	15.076	18.3558	13.0103	14.7951	15.0447	15.9929	25.1591	15.4187	15.145	157.763	147.686	115.618	123.703	102.2	147.859
NM_001007636	3296.17	2805.87	3517.04	3201.85	3335.12	3296.19	2797.12	2469.5	2644.46	2253.02	2410.26	5303.48	6251.87	6222.62	6358.71	4687.14	5767.26
NM_001007637	4333.43	4191.27	4336.8	4293.92	5426.87	5129.67	5005.74	4407.17	4307.59	4347.88	4659.32	11403.8	11616.3	11722.2	11648.8	11659.9	10490.1
NM_001007638	72.8247	47.6393	37.2594	34.6563	39.2928	39.8985	28.093	43.9302	46.189	37.7667	45.1171	170.405	131.697	103.302	148.36	273.348	119.34
NM_001007639	1929.69	1880.81	2095.31	2331.31	2102.92	2103.32	2034.39	1885.81	1967.4	1882.65	2019.73	4772.1	4520.16	4819.3	4924.58	4044.03	4186.66
NM_001007640	600.415	381.285	451.169	502.755	487.489	561.734	528.374	495.899	481.601	503.159	520.117	1786.07	1186.19	1607.55	1528.01	1941.65	1457.9
NM_001007641	5754.5	3897	5552.42	3946.03	4532.88	3636.13	3935.64	3706.36	3253.7	3625.68	3683.72	6919.54	10694.8	7915.39	7679.72	8041.87	6405.1
NM_001007642	3032.02	2967.55	2823.22	3425.3	3753.51	3985.25	3718.29	3470.38	3426.62	3457.87	3592.91	7763.04	6109.81	8470.72	8649.44	7976.45	8534.16
NM_001007643	16152.2	16479.3	16076.6	16707.2	14777.4	15713.9	15062.3	15814.6	14725.9	13804.6	14189.8	39154.8	38075.7	37334.3	39985.2	41319	34709.6
NM_001007645	537.566	756.679	665.208	599.817	812.392	1080.07	1036.1	946.577	842.004	815.779	937.47	2419.82	1569.26	2504.65	2775.81	2093.33	1712.4
NM_001007646	8003.63	5309.59	8611.08	4512.36	9479.52	8218.3	7166.03	6357.12	7034.63	10606.1	8501.89	21318.6	22744.5	23095.8	23881.7	27974.6	17079.6
NM_001007647	4007.33	3704.55	3937.62	3676.06	3513.17	4079.4	3818.81	3722.5	3891.05	3564.6	4156.65	8898.11	7083.33	9033.63	8800.7	8351.63	7987.39
NM_001007648	65.7536	27.3329	93.1801	45.9116	39.7829	57.8492	32.9014	59.9037	55.0196	57.7555	75.5568	172.055	225.177	84.7361	161.869	232.376	180.163
NM_001007649	2020.58	2318.98	2523.92	2064.51	2219.14	2063.36	1970.24	1856.65	2152.55	2049.45	1921.99	5157.53	5081.45	5346.64	6106.53	5555.61	5687.34
NM_001007650	79.9748	84.1093	90.7306	86.3994	85.528	96.1943	88.8624	119.411	83.6784	76.339	70.519	493.148	643.02	387.561	411.927	345.214	527.337
NM_001007651	3436.06	3070.81	3385.49	3163.68	3218.23	3959.86	3258.25	3193.12	3606.74	3118.25	3562.38	11142	9613.6	10324.6	10854.9	10557.6	10132.5
NM_001007652	4378.57	4059.08	4555.67	4116.24	4888.01	4708.69	4593.78	4385.66	4268.02	4655.34	4514.49	11059	12268.4	12984.3	12684.9	11353.3	12590.1
NM_001007653	5476.85	4102.22	5361.89	4813.31	4572.55	4954.52	4186.8	3768.85	3899.21	3665.61	4275.28	9159.19	8524.27	9413.64	8424.47	8913.61	8602.76
NM_001007654	2489.2	2167.46	2328.81	1830.96	2976.94	2896.34	2803.2	2428.21	2824.49	2495.21	3090.43	9369.06	7991.98	9362.3	8541.86	9307.34	6848.82
NM_001007655	6664.55	5670.48	6509.46	6159.85	6572.06	6738.84	6677.73	5850.3	5755.53	5514.58	6575.73	14967	15113.2	16225.1	15662.1	17642.1	14818.4
NM_001007656	12533.1	12490.6	11556.3	12126.3	12629.1	12480	11962.6	12447.8	12262	12353.8	12861.2	30688.5	27001.3	28685.2	30634.8	24952.3	30182.3
NM_001007657	988.751	976.689	1066.63	1053.81	1051.78	1189.34	1021.76	989.196	1089.96	846.319	1112.05	2904.47	2343.3	2777.75	2956.43	2718.62	2449.69
NM_001007658	339.034	253.949	378.791	307.602	471.514	517.107	436.11	360.108	537.52	389.082	602.179	1491.57	755.983	1737.11	1578.37	1311.75	1178.84
NM_001007659	6403.39	6562.32	6546.29	7330.99	7894.73	7241.74	7312.22	6071.22	6613.7	6112.86	6775.69	17240.8	15896.6	19204.9	19214.3	18924.3	17709.1
NM_001007660	1264.59	1088.33	1360.62	1465.14	1147.03	1252.13	1242.29	1688.66	1291.58	1336.04	1392.18	3360.53	3079.74	3416.26	3684.83	3257.45	4002.17
NM_001007661	9252.78	7053.93	8164.93	6940.5	7906.54	7614.81	7019.26	6255.19	6507.11	6137.57	6972.6	19190.5	17188	16682.4	21104.7	24381.2	16342.4
NM_001007662	5074.18	4342.07	4697.6	4790.33	4730.96	4822.79	4749.66	4781.88	4688.86	4848.63	4482.26	12959.5	12719.9	12863.1	13084.1	13194	14037.4
NM_001007663	4823.53	3558.06	4741.52	4454.35	4013.14	3789.77	3863.46	3896.84	3839.46	4249.5	4213.98	9566.49	9726.93	10475.6	10214.1	10595.7	8949.92
NM_001007664	4646.94	2585.25	3434.03	3200.47	2908.5	2321.17	2502.52	2320.92	2272.01	1966.46	2614.85	8659.44	10198.7	6428.43	8092.74	11754.5	6646.2
NM_001007665	5714.86	5291.57	5304.64	5767.77	5331.7	5871.7	5314.87	5168.09	5993.48	4952.08	5954.27	14814.9	13141.6	15252.8	15545.6	17010.2	14452
NM_001007666	1447.77	1381.07	1478.94	1647.27	1837.73	1951.58	1785.27	1532.28	1559.94	1465.69	1613.44	4165.64	3021.04	4163.2	3915.5	3618.04	3824.86
NM_001007667	8263.92	9384.04	8197.88	8823.8	11054.9	11050.6	8981.52	7717.14	8454.34	8484.14	7960.6	18436.3	21508	21992.1	21571.3	19228.8	18766.6
NM_001007668	16221.4	17549.1	16995.6	18902.2	18000	19226.4	18287.3	18912.3	21886.5	20705.4	23078.4	42335.3	40354	46056.8	45300.4	50333.3	46080.1
NM_001007669	901.19	653.86	764.626	773.687	923.735	939.791	1009.68	834.205	973.27	833.994	934.627	2451.5	2034.76	2561.67	2545.55	2381.6	1802.56
NM_001007670	19.5194	41.1762	27.2025	22.3778	21.3055	18.1771	16.0199	17.5039	17.0227	24.4733	21.9329	83.49	92.727	72.6484	92.7188	81.5034	97.9336
NM_001007671	2062.53	1994.67	1942.12	1959.48	1940.24	2021.5	2046.45	2032.22	2065.68	2024.14	1934.41	5568.5	3909.37	4697.45	5361.99	5377.66	4674.55
NM_001007672	1494.19	510.999	1136.43	708.235	770.961	819.407	653.652	800.338	607.272	1116.7	795.113	2021.5	3682.69	2447.74	2803.08	3891.51	1882.99
NM_001007673	9767.47	11360.2	10910.6	11385.1	12720.9	11968.7	12297.7	11959.3	11193.2	12788.4	12636.8	26540.8	26130.8	29376.9	30400.3	28456.5	26443.6
NM_001007674	1723.83	1810.47	1840.69	1943.28	1835.14	2030.38	1998.24	1775.28	2165.28	1847.1	2071.53	6156.46	4207	6554.15	6217.09	5442.53	5929.68
NM_001007675	450.508	270.641	490.573	500.463	282.904	339.733	373.104	399.922	473.156	301.827	611.493	1257.08	929.722	1361.78	1577.37	1485.35	1733.14
NM_001007676	5149.71	4537.14	5040.58	4913.44	4957.4	5304.3	4304.25	4487.92	4494.6	4869.97	5191.47	12294.6	10901.4	13184.2	13788.5	12765.8	11229.2
NM_001007677	64.3075	37.994	57.4868	59.6037	56.5155	61.7033	49.9559	48.4239	54.8761	50.1482	57.1005	237.918	227.773	163.921	286.162	210.989	186.267
NM_001007678	2588.39	2580.4	2786.12	2897.19	3023.4	3106.64	3195.06	2772.14	2675.21	2709.11	2819.97	7283.14	6270.98	7156.61	7280.64	6203.01	4666.42
NM_001007679	1339.94	1346.85	1321.22	1478.86	1692.23	1622.18	1762.66	1701.53	1915.37	1490.82	1807.76	4814.69	2906.95	4024.92	4536.54	3684.28	4153.2
NM_001007680	6717.78	6980.4	6974.93	7259.3	7667.51	8133.3	7398.38	6755.33	7129.66	6871.13	7568.2	17782	15905.3	18800.6	19130.1	20728.4	16753.4
NM_001007681	1258.92	881.282	1168.67	881.718	882.637	901.412	1008.67	955.77	934.952	816.539	1015.01	3740.29	4459.92	3739.24	3914.72	3616.2	3467.74
NM_001007682	5522.9	5007.88	5546.18	6845.17	4965.76	5054	5835.08	5316.81	5020.19	5527.35	6018.99	14429	14260.6	15198.9	15425	13065.9	15174.1
NM_001007683	2262.88	2153.9	2505.38	2336.13	2497.31	2110.15	2041.4	2182.71	1638.16	1817.12	1786.7	5967.45	6059.31	5462.78	5978.49	6473.43	5055.54
NM_001007684	136.333	134.77	104.592	178.453	134.582	109.264	182.247	193.909	238.58	185.836	238.779	899.518	380.352	1044.58	905.709	495.787	1029.22
NM_001007685	6322.78	3284.52	4392.41	4402.76	3196.32	2904.07	2543.72	2421.62	3361.5	2545.12	3198.7	13340.3	12750	8991.13	12301.4	20826.5	9733.96
NM_001007686	2731.54	2261.87	2378.82	2180.42	2115.41	2457.41	2412.93	2309.24	2406.78	3056.1	2646.15	5465.89	6255.51	6425.62	6365.52	6119.46	5347.76
NM_001007687	594.688	338.236	405.639	398.461	510.939	508.321	421.804	346.572	462.955	372.697	440.442	1237.44	1370.55	1225.04	1624.54	1180.77	945.931
NM_001007688	664.287	465.998	527.631	609.033	566.278	586.098	638.387	607.007	585.096	611.143	688.068	1747.28	1346.54	1493.18	1834.36	1525.52	1440.85
NM_001007689	3990.42	3084.12	3337.21	3369.78	2553.55	2942.77	3188.9	3593.47	3731.43	3271.53	3815.24	11189.1	7804.14	8663.2	10078.6	10023.2	10344.3
NM_001007690	2817.06	1571.36	2347.95	2281.09	1814.73	1554.96	1684.14	1637.51	1452.77	1658.48	1777.83	3433.27	4490.84	3809.48	4055.57	3876.75	4228.56
NM_001007691	4665.16	4403.73	4640.15	3220.65	6229.19	6932.58	5192.1	4904.88	4503.75	5032.4	6427.29	11256.1	15425.4	16353.4	15362.4	16589.1	8569.81
NM_001007692	399.676	227.05	294.89	305.666	317.971	425.421	347.079	383.206	349.124	433.458	444.104	1621.32	1160.25	1669.38	1605.08	1502.43	1745.68
NM_001007693	4148.13	4046.93	4352.57	4506.63	3704.28	4064.94	4277.39	3883.9	4028.42	4445.34	4157.82	11293.3	9331.88	10491.2	11801.1	10346.9	11106
NM_001007694	339.268	171.071	116.616	1017.21	329.358	291.861	212.447	365.24	582.918	316.832	330.779	510.326	488.825	759.526	950.718	538.713	728.729
NM_001007695	26.3855	17.2648	23.3979	17.8228	34.0693	26.0274	25.2058	21.9069	27.3541	14.8295	16.4494	93.0281	122.891	101.825	165.856	101.427	146.721
NM_001007696	3084.84	2387.22	3048.58	2799.64	2779.68	2624.8	2477.75	2616.69	2753.86	2575.75	2669.23	7945	7260.19	8221.72	7997.67	7795.07	8490.23
NM_001007697	2908.13	3270.66	3764.97	3523.92	3205.75	3170.42	3895.13	3781.59	3755.64	3733.49	3790.92	13146.3	10246.1	10581.3	10391.3	10866.9	11071.9
NM_001007698	5669.35	4660.67	5177.13	4852.69	4465.58	4693.26	3946.83	4842.91	4698.69	4785.32	4985.1	11800.9	11003	10488.7	11617.4	12673.4	12136.5
NM_001007699	6796.54	5743.72	6287.93	6909.57	5864.72	6432.41	6034.18	5800.63	5404.96	5975.16	5458.24	14015.6	13022	12149.6	14267.6	13526.3	13209.2
NM_001007700	12760.2	11799.6	13063.2	12138.2	12418.9	13400.6	12710.2	12986.4	13181	13855.7	13771.8	35522.7	36249.6	34259.8	33572.4	33327.4	34392.3
NM_001007701	14352.6	12611.3	13049.1	12024.3	10999.8	11513.9	10851.5	11623.1	11757.8	12759.1	12453.6	35852.2	33841.9	30940.8	35082.7	35872.5	31796.5
NM_001007702	2597.08	1856.96	2498.88	2406.09	1846.93	2041.59	1910.35	2088.08	2006.88	2235.64	2190.63	5802.57	5213.87	6435.52	5659.57	5283.14	5447.82
NM_001007703	1968.1	1771.9	1820.5	1944.03	1733	2135.2	2099.48	1869.41	1684.05	1597.08	2101.02	6215.87	3781.6	5494.12	5946.59	4891.96	5727.39
NM_001007704	2630.09	1587.58	1993.49	1613.17	1788.51	1688.39	1638.67	1781.99	1716.6	1490.25	1883.86	5476.45	5507.83	5121.78	5874.3	8442.79	3815.65
NM_001007705	4524.52	4016.27	4452.15	4451.47	4374.28	4284.12	3860.88	3983.93	4118.77	3937.36	4785.91	11277	12805	13463.8	11671.5	12823.2	11911
NM_001007706	1167.26	1251.94	1401.27	1333.02	1694.73	1638.49	1606.12	1311.38	1639.51	1284	1444.77	4334.93	3888.03	4534.02	4237.72	4053.99	4449.03
NM_001007707	740.11	623.845	737.432	591.721	850.705	912.626	916.69	802.726	881.327	852.993	1041.74	2678.48	2090.77	2383.76	2785.35	2455.07	2127.04
NM_001007708	5643.95	4119.77	5396.55	4305.02	4953.37	5095.17	4226.65	4559.93	4669.26	5096.12	4720.26	9778.54	10766.1	10277.8	11304.8	13487.8	7716.42
NM_001007709	864.218	732.01	877.459	772.113	776.56	832.802	972.67	1021.31	1009.91	1011.24	1038.79	3089.99	2496.84	3104.73	3553.76	2952.91	2775.65
NM_001007710	1100.99	524.61	890.597	619.317	978.728	1098.15	937.595	880.142	1140.21	1252.91	1352.77	5085.2	4287.14	4721.22	5696.24	10291	3868.25
NM_001007711	5483.21	5819	5678.93	6197.93	4694.23	5457.89	4767.45	4708.82	5263.43	4283.94	5240.19	14512	13062.4	15264.8	12979.2	14562.2	15077.3
NM_001007712	1555.11	829.784	980.339	690.869	1216.87	913.976	852.397	588.317	972.416	879.47	997.152	3630.46	4045.26	2870.1	3816.4	5307.6	3739.4
NM_001007713	5376.67	4467.31	5097.34	4776.22	4551.73	4587.9	4445.72	4703.88	4495.1	6000.07	4582.11	9314.8	13767.6	11450.9	12686.2	9852.51	12451.4
NM_001007714	10762.5	10192.7	10787.6	10887.6	8962.82	9726.65	10578.3	10665.9	9781.81	9745.67	9512.52	29262.8	28165	28511.5	27393	29715.7	28907.4
NM_001007715	1902.31	1053.59	1915.95	1098.9	1334.63	1210.4	1060.37	1281.88	1186.56	1340.43	1410.58	2494.15	3941.42	2765.51	2896.65	3100.18	1977.9
NM_001007718	11.0303	12.5898	12.2961	12.548	13.4028	12.334	16.1783	14.6414	12.2767	14.2192	14.1163	54.1061	51.5148	79.207	63.0078	67.5524	54.9244
NM_001007719	11.2198	19.6746	17.2131	12.5796	14.1304	13.2088	11.6351	12.7747	14.3374	13.7975	11.3596	156.456	92.9576	135.535	93.4231	94.3849	178.442
NM_001007720	7761.76	8365.68	8304.46	8641.66	9462.95	9839.64	10268.6	10349	10432.8	9706.05	10357.6	26563.5	23865.4	25113	25906.5	27338.9	25520.5
NM_001007721	239.249	198.007	213.268	323.88	342.728	339.82	358.968	306.447	262.728	242.619	275.531	739.404	925.462	707.77	868.795	924.072	810.816
NM_001007722	30069.8	17446.6	23304.2	20225.1	33383.8	34004	21060.5	19088.8	27613.7	21759.1	27554.7	48498.8	49650.5	49004	48808.6	45906.9	52193
NM_001007723	7257.16	5721.26	6467.29	7673.11	5735.74	5446.27	5961.15	5362.58	5326.23	4913.31	5492.56	12334.6	13051.4	13537.3	12444.2	14406.3	13993.3
NM_001007724	6488.55	8559.98	7598.52	6200.86	10016.9	10406	9119.38	8954.49	9972.99	10067.6	10189.1	24780	23963.2	25356.5	26411.6	26852.4	22060.1
NM_001007725	828.489	598.567	622.866	574.575	527.736	502.703	507.925	498.43	506.807	434.842	562.141	1871.24	2140.17	1518.49	2060.66	1964.11	1356.94
NM_001007726	313.944	61.0603	248.903	56.943	109.294	96.0314	111.9	124.165	100.938	66.057	172.86	709.324	828.326	429.842	619.821	973.085	186.43
NM_001007727	5804.34	6303.95	5068.5	6198.36	2668.92	2735.75	6731.28	6542.49	3996.19	3271.34	5515.3	13334.8	9470.48	8035.2	9088.77	6836.66	15232.6
NM_001007728	9741.23	7808.71	9118.52	9157.98	11986.6	11155.5	10609.6	9910.58	10325.2	11820.8	10231.5	20744.8	28712.9	27322.3	26333.1	27997.4	23201.6
NM_001007729	376.764	189.15	226.483	220.122	205.789	221.95	200.796	172.986	225.884	163.218	302.65	571.027	1573.69	830.558	813.303	682.553	658.788
NM_001007730	2051.53	3542.15	3351.74	1626.94	4230.66	4946.8	4182.19	3818.21	4133.89	5025.82	5447.37	14623.9	12053.2	17198.9	18457.4	14428.7	10611.8
NM_001007731	5820.52	5218.89	5915.92	6055.32	5748.86	5646.42	5981.26	6062.58	5846.23	6771.51	5652.8	15082.6	16631.8	15958.7	17919.9	14974.5	14768
NM_001007732	2314.98	1386.13	1636.36	1805.89	1360.1	1434.43	1466.91	1407.01	1465.46	1223.61	1483.13	4686.94	5393.42	4250.21	5445.91	6795.07	3840.73
NM_001007733	1055.08	824.312	1031.62	806.456	789.69	822.951	676.405	799.822	896.115	816.792	909.783	2159.96	1366.8	1741.23	2023.59	2219.99	1910.61
NM_001007734	3593.5	3014.38	3238.19	3292.03	2961.82	3253.13	2656.37	3399.67	3291.67	3587.92	3095.21	7019.52	9126.32	8861.33	9089.13	8180.34	7914.23
NM_001007735	705.384	772.133	670.123	895.814	890.52	894.111	849.005	715.11	1008.67	778.105	880.119	2788.7	2210.16	2861.37	3158.33	2786.59	2682.67
NM_001007736	1171.3	863.518	1128.93	1216.27	1154.74	1053.39	1087.37	1084.93	1047.76	1091.6	1232.55	3097.04	2895.61	3122.67	3579.64	3683.33	3380.14
NM_001007737	814.081	680.594	662.954	722.67	786.627	834.234	807.159	758.603	703.69	719.325	722.156	1393.42	1221.85	1642.68	1796.65	1372.47	1244.48
NM_001007738	210.928	147.133	154.165	324.302	266.745	170.404	243.331	199.698	173.856	129.087	212.759	430.295	504.642	427.813	416.366	214.492	444.625
NM_001007739	10044.4	9844.54	9687.98	10371.1	13347.4	13136.4	13919.9	12589.1	11623.3	12361	12297.4	28533.3	28833.4	26583	27146.2	29022.8	26579.5
NM_001007740	3805.98	3331.4	3811.62	3420.14	3541.58	3594.82	3286.57	3668.87	3960.18	3559.62	4002.8	9284.61	7048.33	8592.15	9443.22	9344.87	7486.8
NM_001007741	617.745	859.563	615.63	908.326	692.266	994.047	871.123	815.342	884.625	942.798	918.439	1977.67	2158.19	2789.14	2565.7	2629.23	2466.96
NM_001007742	4830.44	4730.2	4835.62	5053.28	4422.59	4571.28	4312.76	3867.54	4472.54	4229.72	4637.12	11301	10057.8	12830.8	12247.3	11737.9	10892.9
NM_001007743	4353.75	3529.14	4846.33	4349.95	4616.25	4579.69	4487	3917.84	4173.03	4181.84	4608.26	14673.8	13150	14964.9	13909.1	13213.2	14356.6
NM_001007744	698.605	604.883	647.802	763.863	793.608	820.088	789.375	775.195	816.966	817.301	946.473	2822.12	1957.95	2531.57	2549	3055.45	2970.23
NM_001007745	1166.93	1186.13	1075.55	1347.82	1123.38	1127.78	1460.87	1339.02	1357.58	1304.51	1202.24	4335.28	3653.31	3307.89	3880.08	3963.66	3905.12
NM_001007746	3064.65	2354.21	3277	2812.32	3775.16	3954.12	3828.86	3447.02	3532.12	3613.56	3733.83	9947.47	9900.98	10306.4	11020.8	10318.4	10688.6
NM_001007747	5011.78	4327.84	4857.23	4566.49	4842.48	4969	5361.67	4680.77	4729.19	4927.51	4990.12	15398.7	14810	14942.2	14875.7	17150.7	14186.1
NM_001007748	1574.03	1021.63	1347.76	1490.24	1133.18	1240.7	1117.96	1023.44	1211.72	1037.25	1328.26	3176.67	3136.62	3480.44	3527.84	3946.12	3500.51
NM_001007749	530.8	476.15	552.774	534.877	547.604	702.524	615.461	524.89	615.709	564.384	701.299	1652.01	1186.17	1989.1	1822.76	1811.4	1153.42
NM_001007750	7956.31	7049.96	7970.76	7140.25	7566.58	7643.74	6969.67	5995.66	5764.5	6431.16	5345.77	12137.4	13034.1	13900.9	14440.8	12666.5	13416.5
NM_001007751	1242.71	804.105	880.694	1175.82	801.682	887.577	1045.4	1049.07	1135.37	1099.22	1284.07	3363.38	3366.2	3432.46	3548.86	3247.4	3694.8
NM_001007752	671.067	214.108	389.063	191.332	212.641	319.009	253.105	222.241	244.488	174.541	364.296	907.753	1052.51	415.883	1370.59	2038.39	326.248
NM_001007753	1446.5	1162.97	1392.79	1352.64	1280.47	1386.11	1168.12	1106.23	1307.41	1155.36	1424.25	3068.99	1956.26	2977.45	3467.64	3301.64	2684.92
NM_001007754	326.761	212.012	263.014	303.545	366.132	333.258	325.973	304.995	338.049	278.71	358.015	1037.04	789.492	1061.46	1076.72	898.733	845.027
NM_001007755	597.738	401.982	420.423	472.845	468.998	501.679	524.922	482.984	483.61	431.656	545.095	1890.13	1442.42	1480.8	1774.6	2273.67	1277.22
NM_001007756	2168.77	1851	2136.9	2145.28	2610.86	2786.79	2858.66	2469.2	2827.9	2387.22	2678.39	6831.32	6241.09	8172.67	8920.77	7379.15	6141.92
NM_001007757	1678.34	1588.15	1593.03	2201.32	1809.95	1984.23	2044.39	1941.91	2055.11	1681.98	1699.2	5404.77	4451.93	5212.28	5110.52	3934.45	4801.97
NM_001007758	1247.5	1342.45	1368.87	1524.97	1263.31	1525.29	1356.33	1320.49	1409.84	1315.78	1627.8	3665.62	2791.67	4556.08	4542.51	3746.77	3840.79
NM_001007759	1029.29	881.924	883.578	690.447	853.722	973.249	1190.66	972.865	953.594	681.224	946.947	2857.22	2053.84	2548.79	2767.86	2083.4	1941.4
NM_001007796	2719.46	2307.09	2708.46	3053.75	2468.78	2543.59	3084.82	2883.69	2814.87	2840.09	2968.2	10154	9398.3	9744.69	8972.2	10570.9	9084.41
NM_001007797	6132	4923.41	5705.02	6164.52	6386.66	5229.47	6765.99	7477.96	5351.96	8199.67	5505.8	11291.7	12402.9	11215.6	10746.1	7718.53	12644.8
NM_001007798	180.907	106.478	129.952	149.351	185.434	177.404	163.446	144.585	139.95	139.705	190.103	422.618	234.498	314.657	483.957	357.976	358.001
NM_001007799	4069.74	4038.79	4391.74	4095.44	3666.7	3652.95	3761.46	3226.27	3456.13	3008.1	3182.27	8785.7	7767.47	9449.9	10179.4	8705.55	9065.28
NM_001007800	5911.05	6128.51	5835.01	6571.02	5839.14	5449.43	7227.06	6735.88	6503.5	6745.02	7099.89	20337.7	17174.7	19045.4	17339.2	20124.6	19803.4
NM_001007801	8180.5	7517.89	7709.79	7338.46	8076.29	8349.57	8035.57	7089.02	7537	7626.66	7870.63	22268	19103.5	20241.9	21459.9	22235.1	19786.2
NM_001007802	851.01	558.871	592.143	639.071	730.169	750.288	709.473	622.881	697.846	767.781	823.476	2632	2314.11	2235.72	2205.28	3369.95	1729.24
NM_001007803	5414.03	3989.61	4771.61	4426.3	4446.79	4608.18	4150.64	4456.98	3851.37	4477.32	3775.49	9793.72	10892.3	9473.6	10176.9	11716.4	9474.22
NM_001007804	11330.1	11754.9	11472.5	11733.2	13569	13099.2	12261.9	10575	11446.1	10292.9	10984.4	29251.5	27186	30584.2	31608.4	28354	26559
NM_001008217	10860.5	11491.8	12218.6	11323.1	10014.5	10284.8	9463.63	10195.3	10541.5	10064.5	11069.9	25699.6	24487.6	26138.2	23390.4	26516	24915
NM_001008277	1592.59	1113.97	1659.88	1543.01	1688.39	1796.44	1763.28	1454.26	1570.77	1568.67	1622.62	4553.36	4110.41	4831.49	4958.51	5149.22	5347.93
NM_001008278	681.662	619.001	659.459	693.813	646.002	740.256	719.725	644.471	633.26	572.067	758.26	2169.08	1482.45	1886.83	1864.89	1663.76	1621.94
NM_001008279	5186.43	4392.36	5634.75	4901.88	4769.76	5114.15	5059.92	4528.49	4465.43	4778.99	4367.75	14060	13637.1	12830.2	13703.4	14291	13042.9
NM_001008280	8187.44	6351.02	6685.86	7716.49	7486.65	7601.7	7576.93	7416.59	7384.17	6944.45	7492.18	20308.6	15982.6	19668.4	20713.6	19728.3	21351.6
NM_001008281	11024	11825.1	11636.7	12207.5	12729.8	12723.5	12821.5	12027.3	12179	12152.7	12661.7	31921.4	29892.4	32286.5	30700.2	31773.7	36233.3
NM_001008282	1218.92	1016.13	1126.54	1244.92	1147.64	1127.39	1132.24	1070.62	1411.67	948.316	1210.09	4011.77	3277.51	4109.69	4675.85	4736.58	4248.4
NM_001008283	806.499	899.105	1110.1	941.901	1255.88	1156.15	931.836	955.588	1015.57	970.444	1022.99	2560.19	2381.18	2768.19	2541.52	2554.25	2070.8
NM_001008284	2710.72	2452.8	2336.36	2278.77	2041.54	2129.37	2420.35	2795.56	2681.37	2532.75	2558.08	7203.34	5808.12	5639.59	5899.51	5525.4	6511.43
NM_001008285	1010.02	889.059	1027.86	1045.06	1327.68	1297.51	1080.16	946.485	1047.42	1127.49	1188.56	3304.25	3095.38	3730.62	3540.26	3787.9	2931.85
NM_001008286	2817.12	1950.66	2484.81	2624.21	2673.16	2904.19	2551.19	2340.1	2525.87	2231.5	2644.9	6877.12	5175.79	7490.67	7103.04	7281.18	6373.38
NM_001008287	1244.07	1047.39	1229	1312.59	1137.74	1112.98	1026.45	989.872	1032.36	925.961	1009.52	2926.19	3317.61	3013.02	3161.43	2677.54	3134.64
NM_001008288	7199.22	5468.75	6583.27	5773.61	5474.21	5366.99	5140.65	4986.8	5360.4	4509.22	4464.43	12609.7	14122.7	13647.9	14268.4	17841.5	12912.8
NM_001008289	13671.2	11828.1	12601.5	12302.9	11232.2	10465.5	10495.8	12060.6	11533.9	13186.8	11873	25053.8	29285.1	27910.4	27015.9	26302.4	26614.7
NM_001008290	6791.04	5396.96	6041.04	5350.13	6186.28	6240.63	5656.43	5841.73	6132.97	5936.97	6509.79	14089.5	14703.6	14846.1	15185.4	16017.3	13452.7
NM_001008291	2041.06	1616.21	2072.42	1752.95	2262.28	2211.75	2004.82	1846.28	2022.96	1812.73	2227.38	6478.84	5320.38	7031.68	7062.54	7217.65	6732.62
NM_001008292	2197.97	1601.47	2035.88	1548.21	2021.75	1928.78	2031.47	1824.55	1877.63	1595.43	1953.17	5716.7	5630.74	5849.14	6386.91	6711.26	4310.21
NM_001008293	3226.91	3032.51	3094.04	3298.4	3274.59	3326.98	3338.76	3047.12	2899.99	2887.04	3028.9	6621.48	6001.23	6433.35	7655.71	6155.58	6753.74
NM_001008295	7374.17	7124.34	7394.14	7788.05	6742.75	7150.75	7403.14	7641.21	6927.38	7744.75	6301.94	19006.4	19364	17462.6	18037.6	17771.3	19645.1
NM_001008296	1599.08	1528.57	1777.4	1657.1	1812.87	1855.95	1543.25	1413.38	1661.07	1242.39	1633.53	3379.1	2104.9	3240.25	3521.41	3098.08	3178.99
NM_001008297	5178.85	5349.93	4994.14	5009.54	5765.66	5297.15	4721.12	4621.35	5227.8	4431.64	4875.94	12860.7	12672.4	13488.3	13524.2	14164.9	13035.9
NM_001008298	3898.89	3662.17	3775.34	3479.6	5335.77	5706.58	5801.49	4830.2	5056.98	4809.68	4787.68	11376	10588.7	11323.1	12974.4	11904.7	9774.85
NM_001008299	1607.63	1324.51	1536.35	1631.77	1577.65	1739.91	1702.65	1501.7	1459.85	1461.45	1727.21	3952	3363.19	3780.45	4174.39	3959.69	3719.45
NM_001008301	6215.6	6021.13	6680.68	7117.16	7426.55	7439.57	7178.01	8062.2	8442.21	7250.18	7704.47	22109.7	20676.1	22260.8	20299.5	20490.3	22241.9
NM_001008302	6306.87	5074.85	6017.88	5394.27	5402.01	5555.51	5115.08	4763.56	4878.74	5407.78	5215.2	9793.89	9530.82	10132.3	11513.4	10794.8	9358.99
NM_001008303	794.201	631.431	764.857	784.579	740.006	870.914	674.485	653.747	784.225	679.523	946.506	2380.73	1701.7	2316.96	2441.79	2356.31	2015.04
NM_001008304	8750.42	8288.73	9051.5	8087.28	9465.16	9684.17	9803.76	9758.84	10697.5	9011.92	11159.8	28828.1	22465	26792.1	25311.7	25939.6	23387.8
NM_001008305	2171.15	1959.52	2162.61	2414.36	2422.5	2416.89	2032.95	2076.5	2323	1998.92	2343.59	6609.5	4746.43	7135.78	6832.66	6214.01	6628.69
NM_001008306	741.112	680.314	972.565	734.751	1467.19	1319.37	977.181	776.532	1103.07	1053.97	1164.06	3217.07	2337.25	2518.15	2789.39	3298.15	2162.03
NM_001008307	1114.47	1046.31	1033.92	904.758	1121.65	1004.21	917.946	780.467	1072.7	1043.38	941.747	3970	2885.16	3929.7	3824.61	3137.61	4027.09
NM_001008308	2156.09	1863.33	2158.57	2315.84	2055.23	2149.65	2018.5	1668.95	1668.3	1810.27	1515.04	4178.49	3868.16	3644.38	4188.37	3795.77	4211.2
NM_001008309	9312.08	8315.56	9140.44	8869.89	8901.93	8319.98	8519.68	7189.93	7827.19	6572.51	8026.48	17274.5	20316.4	19990.5	19478.9	17803.3	18760.9
NM_001008310	296.919	434.42	386.069	127.897	216.345	205.895	393.617	369.508	200.523	179.532	350.192	797.202	883.15	706.275	619.269	521.072	620.983
NM_001008311	6610.85	4565.85	6618.18	4585.14	6815.82	6385.83	6682.5	6513.4	5978.51	10926.5	6472.19	11233.3	22021.4	19631.1	15856	11310.3	16719.3
NM_001008312	18281.8	16182.8	17827	18631.8	22652.4	22118.8	22072.6	19366.4	19182.1	22007.5	19793.3	41332.9	41997.7	41909.6	42107.6	44576.9	44309.4
NM_001008313	7946.78	8240.27	8885.49	8733.31	8354.4	8269.79	8628.79	7679.06	7776.9	7445.46	7777.45	18023.4	18239.1	18075.2	18118.5	16371.2	20415.7
NM_001008314	3765.95	3467.14	3576.75	3975.29	3403.99	3584.84	3461.99	3256.92	3274.56	2964.85	3007.68	7102.28	6248.1	6356	6741.86	6516.1	7432.54
NM_001008315	848.29	522.704	728.039	505.817	716.676	622.531	542.214	565.429	641.003	732.289	792.153	1962.73	1971.85	2056.14	2131.92	2775.05	1625.22
NM_001008316	220.13	142.634	208.474	192.575	504.859	292.521	258.481	257.779	262.268	337.252	331.23	618.658	571.533	615.495	738.244	731.164	670.845
NM_001008317	1828.84	1345.64	1709.37	1550.14	1758.28	1894.18	1790.28	1975.42	1809.27	1877.54	1925.07	4332.81	3505.62	3717.41	3980.87	4962.37	3833.02
NM_001008318	2878.78	2447.99	3080.5	2917.22	2810.41	3070.45	2982.97	2959.22	2967.72	2558.55	2792.55	7182.12	5051.89	6484.59	6543.98	7125.67	6899.94
NM_001008319	5422.81	4402.52	5471.22	5344.49	5011.83	5574.34	5418.04	5088.59	5262.47	4826.15	5941.75	14662.6	13932.7	15438.9	14578.6	16069.2	12930.6
NM_001008320	2666.6	2576.18	2462.18	1709.18	2501.74	2010.38	2476.87	1992.89	2051.14	2165.09	2318.21	6723.49	7719.53	4662.95	5769.82	7408.74	4982.19
NM_001008321	1188.9	1966.01	1351.22	1490.18	1927.67	1669.64	2050.37	1659.19	1786.75	1693.06	1999.98	5486.65	3004.49	4096.65	3618.36	2991.33	3614.49
NM_001008322	2214.5	1614.45	1857.18	2010.04	2075.92	1957.11	1852.64	1792.4	1807.94	1631.59	1991.56	5674.27	4161.53	5121.21	5744.27	6223.75	5402.96
NM_001008323	11809.2	10091	11771.3	11926.1	11406.2	11568.1	10752.2	10323.8	10230.4	9306.56	10446.9	29082.3	26170.2	29095.8	27980.5	27863.5	26657
NM_001008324	7788.82	6293.05	6165.21	7479.29	5532.49	5420.98	5936.17	7330.95	7450.09	7915.76	7620.84	18859	18853	19236.2	19314.2	18683.2	21193.9
NM_001008325	6761.11	7080.93	7096.52	6773.04	6623.09	6772.27	6177.91	5998.56	6015.75	6051.82	6603.18	16363.5	15368.4	14697.2	16596.5	19084.7	15814.4
NM_001008326	7741.2	7680.76	7806.11	7294.6	7404.28	8093.57	7780.53	7595.5	8129.08	6930.97	7280.73	19671	17108.5	18321.4	19510.2	18677.6	18594
NM_001008327	2175.49	1849.22	1941.67	1702.52	1472.59	1603.91	1522.32	1568.57	1642.84	1543.49	1438.85	3673.81	3353.64	3544.7	4173.08	4293.47	3496.83
NM_001008328	1270.04	378.916	745.696	417.279	601.733	545.444	526.149	413.854	456.027	505.078	563.837	2591.42	3268.72	1633.83	2865.17	5235.82	1517.96
NM_001008329	3342.48	2905.5	3666.77	3538.51	3015.75	2906.9	2701.87	2624.7	2918.67	2406.36	2880.28	6306.1	6089.87	7334.49	6438.33	5706.11	6340.43
NM_001008330	4423.33	3723.09	4306.56	4214.74	4708.04	4359.28	4505.57	3588.97	4108.31	3786.79	4001.37	9994.25	9047.66	8946.69	10030	10113.5	9758.96
NM_001008331	7013.63	6053.56	6616.24	6831.28	5472.81	5608.05	5437.84	5652.69	5865.82	5317.29	6130.25	17472.6	16263.7	16295.8	16448.6	17091.7	14604.3
NM_001008332	96.711	23.7122	39.7166	36.6994	46.4063	32.2338	47.4726	36.8873	47.1591	52.7973	41.4289	148.192	287.805	244.845	155.295	196.221	137.602
NM_001008333	3594.82	3353.97	3409.71	3897.6	3637.94	3621.21	3031.42	3531.16	3627.91	3452.77	3673.71	8317.62	8582.13	9130.09	9419.83	9385.17	9334.53
NM_001008334	1676.83	1521.87	1789.97	2454.22	1869.41	1986.4	1817.77	2185.54	2182.37	2137.56	2078.96	3588.12	3451.93	4540.13	4358.11	3930.2	3982.39
NM_001008335	11474.8	11811.1	12022.8	12885.1	10787.9	9740.78	11216.6	13931.3	12549.7	13176.3	13332.9	36440.7	34879.6	37312.5	35382.3	33357.4	36997.1
NM_001008336	5068.59	7367.21	7675.65	7514.58	5557.23	4973.54	7445.15	7722.8	7302.24	7615.84	7188.67	23724.4	22556.5	21814.3	23190.1	19401.6	24311.6
NM_001008337	2028.55	1955.87	2154.53	2338.78	2247.41	2425.54	2135.63	1912.59	2261.93	2134.07	2493.24	4133.27	3238.25	4287.18	4542.63	4575.34	4112.3
NM_001008338	4716.56	4415.4	5198.48	4242.03	6765.68	7061.05	5895.42	5206.48	5645.26	6375.37	6362.27	14085.6	16373.9	18782.6	18626.5	16191.5	11784.5
NM_001008339	3517.31	3668.75	3466	4045.29	4501.58	4729.72	4763.32	4039.98	4491.64	4164.82	4157.76	12274.5	10474.8	12215.7	12246.3	12629.4	11697.2
NM_001008340	911.919	760.288	868.758	856.021	884.627	915.093	789.125	732.309	818.34	857.284	873.604	2018.34	1610.74	1944.05	1915.36	1996.95	1724.05
NM_001008341	13.6635	12.2245	13.8843	12.522	12.6433	12.2138	13.8617	12.2375	13.8246	14.5394	12.675	50.3973	97.0114	68.1288	44.3715	91.3487	51.1563
NM_001008342	2565.34	2042.08	2161.46	2472.89	2057.67	2315.95	2073.68	2021.03	2193.22	1788.9	2027.65	6000.88	4862.51	6022.7	5858.45	6672.52	4656.26
NM_001008343	5463.38	4583.46	5173.96	4714.58	4535.97	5007.41	4438.6	4013.97	4126.03	4437.72	4533.6	9734.68	8795.87	10143.9	11171.7	10837	10381.6
NM_001008344	2789.74	2465.53	2474.48	2481.77	2466.94	2932	2652.78	2170.27	2315.13	2356.43	2361.12	6045.82	5599.94	6585.68	6642.64	6704.14	5725.58
NM_001008345	9386.85	7896.61	9009.23	8082.85	8720.11	8622.47	8925.08	7896.87	7430.98	7636.57	9075.97	20145.8	21198.3	19281.5	18901.5	23468	18136.1
NM_001008346	642.392	664.853	642.565	572.186	791.237	779.446	846.405	630.185	712.708	796.758	807.121	2504.48	1354.77	2106.34	1965.85	1919.61	1990.72
NM_001008347	867.904	204.939	623.88	263.125	380.333	413.259	395.924	354.902	364.741	225.849	391.533	1018.12	943.115	705.436	1103.81	1271.83	382.257
NM_001008348	988.459	823.461	858.329	781.436	750.21	775.149	987.011	879.705	965.002	1131.79	1028.64	2858.39	2900.53	3095.2	2824.2	2676.32	2559.73
NM_001008349	206.098	114.143	158.868	101.963	135.151	134.624	135.082	134.582	125.994	118.153	143.727	615.5	419.443	720.804	672.5	520.582	460.591
NM_001008350	2752.78	2204.25	2619.74	2458.18	3487.77	3212.74	3055.66	2323.89	2571.24	2664.23	2709.87	6100.08	5701.67	6620.64	6744.55	6593.42	7541.79
NM_001008351	2420.68	2089.9	2387.5	2278.15	2151.01	2215.24	2230.68	2419.78	2542.41	1965.21	2629.3	8547.33	6567.03	8750.93	8607.73	8586.51	7499.02
NM_001008352	5664.22	4709	4948.9	6138.75	4500.95	4569.4	4367.59	4779.98	5028.11	4503.23	5214.73	10816.4	10272.4	11196	11791.5	10475.4	12537.5
NM_001008353	806.565	857.002	877.369	878.562	762.251	872.757	872.283	1011.77	929.888	832.732	976.645	2331.55	1194.4	2110.94	2512.08	2294.19	1735.55
NM_001008354	1751.91	1814.11	1647.74	1721.66	1286.01	1287.16	1493.98	1837.22	1766.62	1655.78	1631.16	3682.67	3344.56	3268.19	3782.2	3223.95	3246.62
NM_001008355	5908.13	5623.73	5786.97	6208.48	6530.25	7046.03	6583.67	7123.07	6750.37	6499.52	7046.46	18845.8	18613.7	18130.4	18672.7	20440.3	19235.5
NM_001008356	1270.27	1416.29	1408.16	1298.3	1256.37	1183.25	1282.35	1302.54	1504.89	1225.04	1706.75	4302.65	4124.16	4941.1	4470.12	3776.69	4029.14
NM_001008357	599.929	611.855	529.656	909.918	528.012	569.759	702.911	581.409	621.378	638.026	614.478	1736.31	1472.57	1594.57	1931.75	1641.15	2296.82
NM_001008358	2388.37	1911.86	2150.03	2136.69	1797.94	1910.36	2470.9	2093.76	1939.33	1832.27	2076.88	4898.56	4200.35	4491.08	5297.1	4348.74	4451.91
NM_001008359	34.3713	41.2944	40.6669	44.9597	29.0017	34.6588	35.8171	35.129	33.7252	31.3404	33.7536	132.377	173.137	137.9	179.983	169.408	163.399
NM_001008360	12421.7	12151.5	12346.8	10326.8	11212.6	11280.6	11168	12610.5	13953.9	13383.8	14635.5	41343.8	35284.3	41950.1	36834.5	40764	37638.2
NM_001008361	13688.8	11334.6	13324.2	13573.6	12752.6	13143	12765.1	11744.4	11660.9	12497.4	13132.3	27658.1	27058	28075.6	28690	27764	27422.5
NM_001008362	678.879	585.207	602.534	750.113	517.392	535.054	701.971	776.037	661.021	736.376	632.19	1731.94	1314.06	1867	1787.84	1344.86	1554.16
NM_001008363	1615.62	1836.45	1554.89	2110.9	1682.84	1698	1736.26	1831.76	1865.82	1786.36	1946	5175.16	3933.52	4829.55	4599.43	4887.8	4747.22
NM_001008364	2247.06	1885.11	2023.87	1869.38	1571.52	1690.3	1536.4	2022.8	1873.85	2198.1	1913.8	5563.18	5798.39	6675.87	6154.37	5645.15	6388.52
NM_001008365	5006.36	4690.11	5244.21	5528.7	4721.24	5042.33	4782.35	5085.13	5364.4	4603.57	5293.84	15958	13728.3	14740.3	15122.1	14307.6	15812.1
NM_001008366	977.284	461.265	742.052	808.549	746.857	977.86	779.931	743.803	830.419	689.618	808.561	1804.32	1386.35	1785.2	2022.65	2038.84	1714.38
NM_001008367	1886.4	1009.62	1384.02	1181.43	1140.58	1155.36	1017.35	872.606	1125.96	964.834	1276.58	3319.12	3000.68	2714.55	3339.62	4816.88	2591.18
NM_001008368	9455.25	8318.12	9755.95	8951.84	13816.3	12775.4	12791.7	10569.5	11293.1	14548.2	12409.7	29642.2	35008.2	34191.6	33783.8	28369	34829
NM_001008369	4487.32	3864.55	4526.31	4494.91	4137.77	3950.51	3890.47	3826.34	4246.2	3130.69	4446.93	14082.3	12043	14083.6	13484.6	14737.2	12933.5
NM_001008370	6334.02	7400.93	6240.71	6989.99	6531.42	7802.9	8819.78	7293.91	7365.1	7561.97	7589.62	23963.5	20774	23285.9	22830.5	20432.9	19383
NM_001008371	4254.33	2958.54	3703.15	3298.22	3592.85	3722.79	3851.29	3398.93	3345.58	3436.88	3622.34	8219.12	8019.08	8652.39	8984.24	8717.87	8286.93
NM_001008372	2410.62	1862.58	2227.57	2200.21	2307.2	2342.37	2229.07	2130.23	2173.01	2386.44	2041	5039.55	5361.85	5487.31	5402.48	5352.14	5007.52
NM_001008373	810.933	536.924	765.214	595.278	671.089	748.951	536.82	487.365	626.312	495.259	657.659	1633.8	1410.66	1449.55	1726.42	1550.57	1629.85
NM_001008374	9469.11	9439.33	9304.13	10151.3	10310.6	9485.92	12772	11170.4	10591.7	9494.67	10097.5	28758.1	25617.1	26685.2	29258.1	26305.4	23846.4
NM_001008375	5106.68	4577.52	4766.35	4624.77	5202.29	5567.43	4914.91	4724.71	4644.32	4361.23	4772.76	8577.58	7603.69	8442.71	9322.1	8269.64	8316.75
NM_001008376	11103.5	9898.24	11247.1	10371.8	11478.7	11250.9	11366.1	9361.1	9917.74	10111.9	10531.7	25517.1	24707.4	26957.8	26461.7	26910.5	25612.9
NM_001008377	410.945	331.925	368.894	421.459	323.413	342.293	331.58	378.769	420.595	349.513	503.51	1420.17	1018.8	1253.42	1390.22	1560.84	1134.96
NM_001008378	6837.58	5405.95	6399	5743.3	6352.29	7023.54	6429.15	5353.02	5246.78	5691.66	5789.58	16137.6	16659.7	16534.7	17654	18234	14693.1
NM_001008379	12262.9	9867.5	10811.8	10775.6	11808.8	11823.3	11213.9	11358.9	12960.5	12051.6	10371.3	29358.8	29971.3	29400.1	32106.5	33966.6	29200.1
NM_001008380	4689.86	3330.96	4332.96	4458.65	3527.34	3305.63	2961.34	3683.07	3386.27	3049.64	3689.3	9176.6	8769.45	9441.91	9632.87	9480.02	7792.5
NM_001008381	5029.89	4348	4603.93	4517.96	4795.45	4817.72	4439.31	3965.09	4214.2	3962.08	3576.1	10606.5	10511.3	9808.59	11131.9	11578.4	9744.47
NM_001008382	7191.76	6413.98	6548.36	5759.65	6104.79	6234.41	5968.38	5534.87	5420.28	5809.04	5583.65	14540.7	15576.7	13140.9	14041.5	14104	14922.5
NM_001008383	32.8864	47.8312	40.6422	32.4648	24.1755	21.1611	25.0429	20.2859	24.5017	29.0617	31.5406	72.1995	162.885	182.594	113.981	177.608	135.997
NM_001008384	371.638	161.307	269.562	279.339	497.41	482.007	382.313	514.617	545.799	445.389	431.189	2140.89	1928.77	2170.48	2411.87	1873.28	2364.85
NM_001008385	261.188	150.418	109.559	251.51	159.16	102.681	221.259	270.781	268.217	195.257	207.103	874.34	510.134	702.778	634.622	732.879	475.984
NM_001008386	944.168	439.288	648.324	553.807	536.068	553.661	578.205	502.188	525.1	663.334	694.874	1765.92	1404.45	1347.29	1982.73	2802.71	1488.82
NM_001008398	219.231	146.589	117.43	175.996	171.673	185.048	136.42	120.378	148.725	144.301	202.073	381.764	456.831	418.905	682.021	679.826	280.6
NM_001008507	2355.47	2150.23	2462.88	2340.93	2715.67	2630.67	2407.65	2102.58	2163.1	2135.6	2313.37	6693.41	5206.37	6898.58	7223.77	6831.27	6099.35
NM_001008508	964.528	711.798	820.183	842.288	1106.46	1189.26	817.428	714.141	980.6	812.739	1019.45	2664.16	2791.85	3330.12	2875.61	3209.57	3165.22
NM_001008509	2532.29	2033.03	2497.3	2695.26	2499.31	2757.84	2480.27	2345.16	2295.76	2230.36	2481.65	6221.17	5602.42	6359.34	6477.5	7007.09	6490.34
NM_001008510	104.136	58.6209	80.7284	86.1858	83.5619	94.7981	71.2663	69.8045	91.0445	80.7762	91.399	351.193	347.935	424.129	382.115	427.333	280.863
NM_001008511	844.875	765.4	705.481	658.227	513.482	638.449	1014.91	547.282	770.069	676.1	659.213	1964.53	1531.19	1889.85	2725.4	2388.09	2139.51
NM_001008512	21.8348	50.3054	26.3761	25.0938	22.7241	23.3372	24.6735	24.6457	20.9117	31.9769	27.155	87.3673	80.7939	51.3887	77.3988	58.68	164.758
NM_001008513	66.1471	92.2509	77.9437	120.197	76.1315	57.529	66.9133	62.8977	65.6291	63.3775	31.4926	250.133	186.904	251.584	346.63	321.728	265.358
NM_001008514	2535.41	800.342	1097.14	846.873	1163.18	885.996	1008.63	678.759	725.64	1080.96	998.723	5907.56	7183.69	3111	6624.53	14840.4	2295.2
NM_001008515	3797.97	3958.36	5027.91	4041.24	4783.62	4232.7	4353.77	4011.98	3970.17	3462.62	4568.71	16065.3	13442	11640.2	11991.4	11671.2	13016.6
NM_001008516	47.6786	23.8962	28.7691	26.6186	34.5577	35.2146	35.5185	42.0275	33.55	35.793	28.8079	137.207	100.803	134.84	109.323	111.281	106.908
NM_001008517	1998.35	1940.06	1965.15	1884.63	1575.02	1573.04	1569.89	1809.87	1738.56	1941.61	1771.73	4446.31	4782.97	4450.75	4617.04	4023.91	4128.08
NM_001008518	53.4206	23.7365	31.1469	29.9836	28.5639	38.322	20.9505	24.0744	25.4527	20.3434	45.0381	140.636	143.968	63.3115	117.331	126.974	88.2407
NM_001008519	6715.74	6032.46	6176.7	5961.06	7966.69	8425.5	7804.8	7251.96	7095.59	7100.47	7483.7	16183.3	16741.9	16795.7	17466.4	17636.1	16322
NM_001008520	4775.73	3987.34	5902.81	3744.32	4459.37	4410.79	3955.95	3863.67	4028.68	3672.96	3795.54	10065.5	10527.7	7960.69	9929.57	9615.05	7865.5
NM_001008521	7204.44	5313.67	6445.47	5587.73	5210.26	5613.05	4571.6	4944.87	5029.17	5933.63	5090.19	11853.8	14584.2	11993.7	12466.8	13081.8	11815.2
NM_001008522	39.3604	59.6922	45.4972	60.1592	41.8111	43.2577	44.9984	39.4206	42.7868	31.2809	28.8993	196.512	108.84	163.243	239.596	125.399	184.856
NM_001008523	27.1989	46.5111	28.3747	61.6066	50.0164	34.5703	47.5862	42.0489	34.1127	46.266	46.9035	158.445	118.425	141.181	159.732	161.448	218.052
NM_001008524	8639.28	8990.98	10059.7	9070.21	7230.68	8573.2	8540.67	6817.45	7842.61	6979.11	8614.94	25390	26243.9	20301.7	23287.5	22823.1	22617.2
NM_001008525	3982.65	3512.68	4006.08	3620.57	4194.12	3910.29	3629.61	3550.79	3753.63	3292.48	4102.95	11531.1	8622.17	11624.9	10808.2	10309.5	11421.8
NM_001008526	11113.8	9616.55	10750.2	9614.75	9986.91	10080.8	8851.71	9441.64	10263.7	10467.6	10173.9	21902.9	21614	25022.4	21140.8	23572.7	20426.9
NM_001008527	63.3187	33.07	32.7076	26.4134	25.7016	28.6293	24.524	25.6553	25.0538	32.9432	58.5546	131.441	159.555	137.713	139.022	298.299	116.103
NM_001008553	548.712	565.057	630.644	538.388	890.43	863.191	655.672	710.059	785.497	622.113	771.574	2568.56	1627.94	3092.07	2688.21	2644.63	2036.78
NM_001008554	14.6334	11.9427	12.5857	11.2478	13.1896	13.4056	12.0966	16.979	11.4465	15.9203	12.779	54.0773	75.1022	65.6471	63.3296	66.2323	61.7503
NM_001008555	2664.44	609.753	4001.92	283.11	759.299	1314.39	863.066	563.978	408.249	925.585	921.638	520.415	1772.74	1033.9	1644.56	901.861	1037.17
NM_001008556	1270.87	1088.6	1191.39	993.411	1861.97	1889.92	1664.73	1594.95	1842.95	1873.26	1921.61	4464.32	3453.74	4133.54	4320.59	4026.72	3656.19
NM_001008557	1800.54	2033.85	2043.59	1858.36	2311.34	2188.13	2924.66	2542.17	2322.72	2167.2	2201.25	5532.86	3249.33	4440.71	4089.95	4469.64	4308.5
NM_001008558	4185.67	3488.63	4340.25	4420.87	3255.06	3474.29	4625.88	4368.87	4371.72	3051.29	4963.35	10533.8	9282.06	9026.44	9326.53	7994.76	11784.7
NM_001008559	226.001	227.89	196.006	227.98	450.083	282.442	250.887	179.862	215.699	342.415	237.601	741.688	723.242	1239.04	1167.64	828.179	838.74
NM_001008560	253.018	775.881	627.386	246.87	352.729	439.808	377.675	1214.58	1006.78	1157.05	532.886	3784.47	1235.09	3741.42	3031.55	2445.3	1877.53
NM_001008561	43.8891	88.8756	46.0334	45.3971	42.2823	32.3254	44.0263	30.0777	40.8337	41.1869	51.2301	86.5657	112.604	75.9959	75.9621	62.4905	188.304
NM_001008562	1422.84	1475.77	1505.13	1670.06	1965.29	1729.32	1583.04	1725.79	1831.99	1349.83	1893.18	5853.06	5598.35	5584.45	5741.08	5183.39	5158.88
NM_001008694	894.978	865.834	1151.88	790.491	1456.19	1366.84	1034.62	859.797	1193.03	1085.14	1435.46	4549.72	4038.73	4530.28	4915.8	4444.67	3700.56
NM_001008721	5534.64	4610.29	5246.58	4419.52	5100.61	4964.74	4592.84	4292.13	4257.82	4404.11	4516.95	9598.15	8287.11	10188.8	10611.7	11381.1	9878.26
NM_001008722	445.405	233.238	298.797	407.976	279.252	349.096	329.46	398.672	403.685	337.316	386.928	1268.33	1861.56	1511.33	1976.57	1771.86	1332.03
NM_001008724	21.3359	33.1758	23.4719	21.2836	22.268	22.0652	22.2186	18.2709	20.2055	26.678	29.4013	81.1397	107.856	72.3691	122.588	65.6955	82.7875
NM_001008725	3833.96	3122.45	3662.45	3090.45	2730.31	2754.75	2437.32	3394.42	2831.1	3347.43	3155.95	6926.35	8863.76	6322.92	8276.59	7503.4	5689.45
NM_001008750	88.3899	598.15	215.435	209.111	164.684	198.607	170.244	143.52	130.333	214.37	205.408	270.681	451.778	263.026	250.347	320.599	1159.1
NM_001008751	50.2131	70.011	39.9359	40.7838	192.106	193.591	181.299	145.696	152.706	139.691	76.3857	348.856	393.274	277.331	414.398	377.579	451.979
NM_001008752	20.323	19.9042	21.7275	24.6911	20.1786	17.0433	15.2575	19.7438	17.2648	19.1183	19.0661	85.5513	64.2242	70.487	78.4764	123.993	74.1163
NM_001008753	45.3347	34.8004	50.3978	51.8427	40.7191	50.8236	52.505	57.9886	29.6511	52.1088	38.0813	97.4135	128.073	136.503	134.237	102.182	99.4318
NM_001008757	20.104	46.6018	29.2039	30.4622	27.2632	25.517	23.5433	21.2454	21.1174	21.8895	21.0184	94.1808	114.047	89.0465	88.9466	78.165	115.256
NM_001008758	47.3802	48.7555	59.3589	82.8841	77.0515	56.0739	61.9517	71.0224	64.0387	44.3244	47.2154	240.77	335.667	244.236	464.398	314.762	387.116
NM_001008759	60.6474	26.2294	64.5199	32.0225	49.5085	39.0721	65.9097	72.8846	30.8047	29.195	62.8622	125.129	257.671	153.736	118.915	128.264	154.811
NM_001008760	42.9865	43.7462	45.6429	46.3305	26.7008	43.7116	47.636	37.7026	38.4294	33.2193	37.9714	89.7019	134.101	94.8859	132.866	95.4217	113.735
NM_001008761	26.859	30.392	21.0195	23.5524	22.0758	24.9654	33.9112	21.7248	27.8474	27.2043	26.1579	122.109	97.6342	107.383	85.0665	78.2999	80.7984
NM_001008762	13.0833	18.0126	12.4856	13.6066	14.4971	19.3546	14.1239	14.5129	13.6293	13.8827	17.8509	51.3108	61.6852	66.7831	52.1713	61.7139	60.4745
NM_001008763	270.655	132.912	242.83	235.286	201.691	224.917	320.612	276.114	256.44	156.645	266.395	545.157	621.853	392.649	522.84	356.653	306.926
NM_001008764	11520.3	9498.71	11167.1	10115.4	9478.51	8949.23	7364.17	8157.79	8794.8	8622.21	8761.83	22484.7	23426.6	21427.5	20348.3	23981.7	22312.3
NM_001008766	3043.34	2486.28	2875.3	2511.19	2536.38	2918.68	2795.18	2530.02	3376.51	2854.7	3159.38	7781.99	6301.92	8213.32	7445.6	7667.12	8361.99
NM_001008767	3370.27	1860.17	2925.35	2288.77	2210.39	2397.14	3482.84	3050.64	2087.6	4537.14	3544.93	8891.27	14769.3	8304.72	8306.91	8894.53	7418.15
NM_001008768	1009.51	834.895	719.022	1900.23	588.337	598.875	1235.66	1900.24	1582.56	1880.16	1025.27	4065.61	2872.65	3914.6	3104.98	2205.02	3730.13
NM_001008770	1520.02	1638.52	1790.6	1642.4	1728.26	1635.91	1407.67	1274.48	1430	1111.06	1583.87	3489.09	3294.12	3740.52	4056.67	3034.49	3069.49
NM_001008771	3977.08	3850.76	3905.26	4484.55	3923.91	4670.28	4269.82	4390.51	4727.16	3803	4768.48	11323.3	8178.2	10346.9	11699	11250.5	9962.86
NM_001008773	6024.65	5817.76	6021.04	5767.89	5249.52	5747.05	5208.82	5451.26	5988.4	5069.09	5231.37	14008	12218.7	12669.7	14693.6	12487.9	11470.6
NM_001008775	10009.9	8903.8	9955.89	9266.17	10806.1	10516.8	10250.9	8614.41	9798.79	9375.52	9557.47	21205.2	20263.3	21017.5	21992.7	20897.7	21567.5
NM_001008776	134.785	123.02	207.972	151.44	129.37	158.175	148.833	118.423	126.174	104.361	121.242	443.139	373.059	364.14	508.288	399.754	415.009
NM_001008802	26.745	54.4098	22.1571	41.6693	27.1405	32.4134	28.9437	35.9993	26.0435	26.2593	30.5942	149.099	139.953	82.3781	82.0848	91.5303	104.126
NM_001008803	51.0247	39.9382	52.8358	54.9678	99.6794	71.7008	78.5226	55.5754	55.6968	36.0299	31.807	259.882	268.69	225.431	271.233	245.514	438.401
NM_001008804	207.333	121.688	251.887	276.1	184.429	141.715	201.632	230.972	234.106	377.548	262.758	806.342	587.741	793.252	721.27	755.098	725.964
NM_001008805	56.5972	56.568	52.0683	53.7279	47.5098	60.7656	52.4569	37.5478	53.4619	48.6216	46.5633	158.133	214.479	156.875	177.452	214.579	136.461
NM_001008806	25.97	42.2356	38.6579	40.4316	36.3935	35.0341	30.1677	27.62	22.0949	30.3409	23.5446	100.822	92.8394	93.7738	81.1016	86.3057	120.787
NM_001008807	165.719	41.3394	168.21	64.9521	33.9363	25.2562	63.2371	82.7542	35.5387	27.7579	42.7358	133.366	182.613	69.6979	60.2464	85.6467	80.2467
NM_001008808	12.8833	11.4077	14.1683	10.832	11.7215	9.2654	13.1394	10.678	10.8751	12.2944	12.0693	82.4978	97.2929	74.6647	67.7062	54.6992	59.9869
NM_001008809	49.0903	85.5514	92.9746	82.9187	89.3274	92.9963	94.521	67.6344	78.0933	48.6467	38.5985	280.995	259.737	300.923	361.692	241.004	389.87
NM_001008810	156.029	135.639	178.17	265.731	229.69	130.743	190.655	163.565	180.803	153.648	116.575	558.215	660.576	522.118	691.287	403.02	644.673
NM_001008811	25.1849	17.919	16.5663	35.4768	17.2817	18.5409	16.0867	14.5095	25.7291	16.5493	12.9269	74.895	65.3555	84.7608	82.3603	82.7973	81.7505
NM_001008812	29.3695	31.991	30.4796	34.3965	28.1792	32.9444	39.0105	33.0395	33.9533	30.4752	35.2262	85.678	80.6497	153.419	94.0565	262.857	109.001
NM_001008813	41.7387	42.6393	58.9894	44.8981	75.0226	60.2264	54.7377	32.6443	34.6821	36.247	27.2337	248.062	320.833	225.673	297.423	206.969	307.967
NM_001008814	238.849	335.174	271.606	257.93	290.327	230.124	299.628	218.287	188.51	143.34	74.3431	934.597	939.5	580.141	655.601	628.999	1335.65
NM_001008815	60.1129	54.4627	47.1689	71.2514	105.19	149.621	128.82	97.1879	93.1284	58.9878	76.5881	204.903	261.097	182.187	318.571	220.42	218.447
NM_001008816	47.4541	44.2651	60.4496	51.3107	44.4878	47.4603	44.9358	50.1557	63.4031	44.6188	32.9463	218.972	219.046	170.51	160.605	209.584	287.055
NM_001008817	51.7893	85.4315	59.062	61.2685	41.2108	59.3095	66.8078	56.0634	56.4839	47.9396	29.2679	167.815	168.132	159.488	120.926	135.345	190.598
NM_001008818	16.183	18.0211	20.0781	27.4178	17.8086	18.2991	18.5627	19.8462	21.9528	23.9942	16.7189	91.4085	81.4916	156.956	89.9225	146.527	91.4099
NM_001008819	24.6501	47.6081	37.1869	35.7707	34.7047	34.5635	34.2825	22.9776	29.9981	26.4245	26.6214	131.915	77.8099	146.708	96.8413	113.305	124.92
NM_001008820	183.858	187.206	184.508	254.774	391.186	342.45	377.419	190.816	192.743	197.489	116.587	1043.96	1251.12	723.233	1257.16	931.749	1619.12
NM_001008821	33.3293	41.8833	37.945	39.6044	46.3961	46.4124	47.0891	57.79	40.7646	43.254	35.1563	104.353	159.404	100.616	123.208	121.549	169.017
NM_001008822	40.2838	38.4572	66.91	58.839	26.3994	43.0388	34.8085	42.5359	41.1207	35.8607	24.8325	172.609	160.475	227.465	180.296	168.532	225.691
NM_001008823	385.88	224.62	372.55	263.942	310.687	261.692	335.569	378.334	397.885	383.811	417.499	725.308	631.964	925.78	728.308	724.089	538.101
NM_001008824	296.531	465.411	508.51	225.966	656.613	557.129	384.183	328.889	505.096	541.042	487.951	1250.95	947.092	1560.17	1223.16	1386.48	1015.58
NM_001008825	32.7166	46.6163	33.327	49.6325	48.0976	41.6821	45.0404	53.7274	38.1577	56.1848	43.6725	115.66	131.941	119.103	146.375	149.765	117.823
NM_001008826	2488.84	3755.1	2546.57	3424.76	2539.88	2529.5	2115.53	1825.39	2541.17	3155.03	2879.42	6687.92	9029.9	8239.83	9101.77	7815.58	10746.6
NM_001008827	4497.09	4524.19	3677.4	4122.35	5834.62	2623.98	4714.39	3316.92	3702.02	5153.27	2518.29	12379.1	12497.6	12708.3	11059.6	14723	16046.4
NM_001008828	19.0234	23.5928	20.5504	23.0581	18.0988	20.1019	21.4113	19.489	22.5003	14.8526	19.5301	113.757	159.796	136.938	185.754	88.5838	171.141
NM_001008829	6883.55	5715.71	5730.64	6042.2	4837.16	4750.67	3679.62	4883.97	2976.24	3296.47	5781.86	14522.9	18681.5	10711.7	17635.4	20678.6	9888.65
NM_001008830	2591.24	1589.91	2197.18	1903.62	2442.59	2082.37	2640.08	1751.19	2669.2	2689.36	916.551	4610.99	5849.96	8125.88	5622.27	6025.64	7880.47
NM_001008831	494.257	44.4372	193.587	49.3377	266.795	90.9231	169.737	91.71	81.5594	143.654	235.83	431.111	840.251	433.168	416.766	1127.54	513.947
NM_001008832	1831.99	1453.15	1529.15	1432.25	2060.78	1601.15	1549.52	1092.01	1368.5	1581.88	1013.85	5868.9	6293.96	6752.01	7058.94	8376.13	8015.63
NM_001008833	1099.75	1051.1	1080.03	1070.77	1390.72	1132.47	1373.8	1065.6	1023.77	1196.43	778.759	5382.11	5080.12	4597.22	5766.53	5544.08	6973.61
NM_001008834	336.822	311.696	456.975	332.548	540.8	656.926	521.463	530.278	737.637	335.089	337.494	1971.17	2471.85	1729.07	2776.1	2115.25	2051.95
NM_001008835	1998.78	1859.87	1462.39	1371.63	2176.98	1750.5	1716.92	1192.21	1152.39	1633.65	955.025	4649.74	5660.89	4849.2	6101.75	5968.9	7395.52
NM_001008836	602.214	604.217	481.421	402.818	379.831	668.301	314.613	506.433	402.196	301.395	415.086	1872.01	2122.21	1623.37	2543.23	3019.04	1635.79
NM_001008837	229.366	271.502	299.383	325.132	456.564	422.134	485.05	253.047	284.361	254.667	116.652	913.314	978.345	1112.22	1085.86	1168.78	2166.38
NM_001008838	3356.61	4841.71	3524	3918.37	5149.48	4167.62	4678.59	3686.04	4509.58	4986.82	2771.14	12342.5	15494.9	15341.2	15209.3	13815.8	21105.9
NM_001008839	2811.95	2405.58	2266.96	2062.36	4508.52	1683.72	4278.6	1601.46	2216.21	3974.66	1550.04	6513.68	7764.75	11667.1	7050.06	6575.38	16814.9
NM_001008840	47.8867	40.2133	25.491	31.4465	99.0048	29.3512	79.1083	24.1804	31.6367	48.7255	15.293	324.227	336.844	546.837	422.894	300.231	2222.31
NM_001008841	364.408	468.291	523.592	598.734	411.459	355.728	378.14	250.696	408.195	223.847	150.848	1255.96	1653.34	1022.11	1921.19	1323.93	1681.46
NM_001008842	367.957	384.213	344.896	451.933	371.69	300.109	456.053	322.407	406.44	392.387	217.204	1239.86	1564.78	1375.92	1264.53	1470.15	1644.1
NM_001008843	591.432	270.997	334.018	302.715	304.481	230.063	299.76	221.32	392.551	232.222	335.117	1432.5	1351.72	657.258	1472.32	2194.7	1003.42
NM_001008845	1630.85	2405.12	1591.41	1849.31	1579.54	1457.25	1535.71	1406.26	2019.03	1898.41	798.957	4608.3	6194.96	7741.15	6056.02	6193.11	8142.85
NM_001008846	27.0394	19.7367	21.3274	55.1028	24.3487	28.4732	40.6638	15.6138	48.8024	21.8372	19.3539	74.7999	120.719	109.856	81.3389	152.893	123.908
NM_001008847	5963.48	929.783	2590.76	678.326	2279.15	1271.48	1592.26	1129.77	953.901	1205.75	2831.94	5712.91	8433.12	4458.11	4146.03	13418	3603.52
NM_001008848	57.4584	113.84	60.501	73.5524	56.4087	87.4415	72.6712	62.6033	68.4558	68.8489	37.3336	110.293	109.634	89.7099	114.43	117.13	119.9
NM_001008849	225.014	270.611	137.97	227.628	334.835	324.322	198.865	244.912	127.148	289.034	246.016	387.206	362.191	510.183	895.823	790.722	650.004
NM_001008850	267.284	190.91	162.396	159.345	310.134	218.019	192.844	207.389	118.225	177.347	257.873	403.751	434.903	617.611	625.3	781.9	456.101
NM_001008851	133.322	100.728	156.908	149.494	181.18	144.01	147.197	141.072	122.25	135.814	145.646	458.646	599.271	415.049	508.22	461.433	442.986
NM_001008852	89.004	175.697	76.755	195.24	193.872	204.209	268.084	300.248	534.375	139.994	226.125	1835.01	558.405	1011	833.058	1064.18	1005.19
NM_001008853	406.792	282.771	501.623	375.825	519.85	475.808	573.365	560.842	932.203	418.453	557.472	1874.15	1036.05	1725.71	1117.03	1368.92	612.301
NM_001008854	1622.18	873.954	1673.67	859.102	1186.54	1370.16	993.173	1259.86	966.945	277.775	1965.95	5934.44	5391.25	4508.96	6555.65	7324.53	903.115
NM_001008855	183.102	92.812	141.724	142.351	139.941	197.156	124.895	139.243	133.143	86.4678	148.654	388.101	360.899	453.397	784.866	401.195	225.869
NM_001008856	219.993	366.67	295.525	271.635	265.663	353.512	256.167	242.647	244.194	154.769	224.187	496.684	577.3	560.399	859.022	700.554	567.972
NM_001008857	155.812	382.169	186.452	220.087	349.74	367.661	340.343	455.449	363.757	404.516	330.653	1110.13	974.936	783.773	1042.77	1261.53	1612.21
NM_001008858	261.387	368.034	243.329	351.982	223.28	255.96	169.318	166.576	204.93	420.568	253.213	873.534	1099.98	731.973	1199.48	998.26	1423.95
NM_001008859	67.8554	58.0736	50.9936	82.7954	73.9813	65.6416	74.4463	78.978	72.2996	90.7438	70.7758	163.866	153.5	117.152	171.613	120.872	302.115
NM_001008861	14527.1	15072.3	15730.3	15025.1	15385.9	14942.4	17257.1	14138.3	14071.3	12667.3	13251.1	31197.3	29529.1	29806.6	33556.9	30885.1	34688.1
NM_001008862	1768.66	1412.51	1689.62	1902.19	2041.6	1831.46	1495.06	1499.65	1344.21	1586.14	1603.51	3860.95	4812.87	4363.26	4277.58	5104.76	3763.77
NM_001008864	48.4078	53.4959	61.0575	63.9744	40.8892	49.208	47.3454	36.4056	47.2611	45.3119	47.8596	161.78	217.707	284.884	169.943	235.719	295.829
NM_001008865	31.6067	67.8368	40.5807	48.9165	51.9163	54.3035	44.8511	35.5127	35.8138	52.1056	42.1131	199.498	251.537	154.667	185.475	177.544	240.127
NM_001008866	50.5262	43.5134	47.982	57.8657	65.1567	59.3911	65.026	42.9259	45.2897	51.146	42.4671	199.245	158.754	193.831	190.206	221.127	139.342
NM_001008867	45.5794	58.3265	48.2316	83.4471	67.1166	53.3867	50.4445	38.9083	50.555	52.8955	40.0883	319.195	320.595	307.644	305.683	263.313	315.939
NM_001008868	35.0955	60.1123	45.958	73.0575	29.8322	59.9721	54.0895	46.2498	47.0225	54.3684	45.2795	157.696	243.488	260.722	318.192	212.295	289.367
NM_001008869	24.949	27.344	22.4738	28.5085	41.751	21.9885	33.0822	18.4341	20.7176	27.5181	21.5523	89.17	165.783	99.406	92.2258	76.0257	119.364
NM_001008870	32.064	32.4498	22.4481	31.7471	33.2926	37.4407	37.9076	42.5999	24.4625	41.6512	31.1684	217.748	123.41	134.774	136.097	140.886	225.623
NM_001008871	38.2388	62.4462	57.4697	40.837	40.1861	53.1707	40.8116	36.6797	47.741	43.2466	43.1103	175.525	120.867	114.104	194.542	115.023	222.173
NM_001008872	19.0738	121.496	33.9127	42.5009	22.528	37.2187	26.326	25.6489	23.4144	33.7856	48.705	243.256	135.953	108.821	119.779	96.0154	172.803
NM_001008873	23.6799	19.8863	25.2929	25.2574	28.3596	25.1328	21.5422	20.9257	16.7811	24.0022	20.2309	78.2661	95.9467	95.4849	86.992	85.2392	112.871
NM_001008874	13.2004	13.5733	14.6237	16.3993	14.6055	15.5664	12.4315	15.3083	13.3004	12.2406	14.9062	76.0619	89.2257	67.5554	71.4148	67.0688	78.2661
NM_001008875	21.6699	58.8745	26.7618	29.4388	41.8502	31.8729	36.3341	37.3143	33.4499	51.5828	54.6412	85.1674	133.68	119.368	106.88	75.1491	125.638
NM_001008876	3566.61	3164.76	3606.02	3473.19	5094.07	5155.33	5258.47	4797.03	4716.7	4269.17	4570.33	10278.1	9127.03	11158.8	12062.4	13164.4	10665.7
NM_001008877	66.3835	75.8498	88.5997	92.8915	73.373	90.6504	75.6311	88.4102	79.4314	78.0659	38.0618	363.16	345.022	411.634	305.906	268.117	409.708
NM_001008878	35.1058	43.7654	40.2211	30.8121	23.6228	22.2543	27.503	25.4445	26.3728	31.1579	26.3754	133.588	137.77	155.519	113.239	99.3035	154.105
NM_001008879	1244.49	1077.94	1300.26	1411.11	1504.77	1355.03	1180.74	1135.48	1100.44	1257.93	1167.74	2536.59	2332.85	2966.14	2880.37	2494.27	2286.91
NM_001008880	141.366	126.546	120.136	189.68	107.998	177.055	194.657	202.117	251.728	559.248	370.176	976.407	774.93	1113.36	1238.55	886.604	1425.9
NM_001008881	23.083	22.9867	37.5497	30.0493	25.9027	19.8829	24.179	20.9257	23.4263	21.4799	16.6101	86.7459	140.547	162.485	148.141	140.717	158.614
NM_001008882	489.358	584.371	614.101	721.723	563.262	625.294	481.811	625.857	592.801	523.068	679.365	2056.91	1703.53	2204.91	1907.9	2328.08	1812.56
NM_001008884	1093.03	289.212	519.99	262.69	478.687	465.697	486.167	472.87	354.95	426.567	1081.35	3462.1	4689.79	2026.61	3608.86	6551.81	2035.75
NM_001008885	4130.6	3419.69	4074.93	3628.3	3923.04	4495.31	4115.96	4031.47	4525.54	4090.31	4362.88	14259.8	13139.3	15136.2	16162.4	16964.9	13892.3
NM_001008886	1352.4	1655.04	1195.57	1433.46	1445.83	1380.23	982.623	865.277	1406.17	2113.35	1600.38	3336.59	4248.19	4538.46	4959.5	5680.42	6258.78
NM_001008887	206.299	204.888	184.813	162.177	179.685	173.425	177.358	115.015	123.942	137.693	125.799	272.046	406.469	275.848	324.061	610.715	262.291
NM_001008888	14138.7	12784.2	13216.1	14880.8	15651.8	15145.4	12908.4	13447.2	14265.6	13323.5	13870.2	26727.4	29296.4	30933.9	29975.1	31842	30008.6
NM_001008889	434.372	354.447	444.061	523.612	553.773	631.804	530.556	620.807	602.125	866.876	655.934	1549.2	1445.24	1539.71	1619.68	1503.56	1533.48
NM_001008890	21.6094	32.6282	28.7985	40.8889	39.2741	31.0916	39.4451	26.4771	32.3447	30.4753	32.6423	115.361	122.588	134.709	109.716	111.764	146.318
NM_001008891	4758.56	3288.58	4040.89	3807.34	3880.68	4060.26	4007.48	4786.32	4445.78	4990.18	4781.63	13548.5	12437.2	11455.9	12095.9	14088.3	12897.1
NM_001008893	227.026	166.247	225.647	228.064	158.088	233.67	173.384	158.582	160.02	162.267	197.802	595.886	550.47	551.915	749.621	519.085	702.171
NM_001008898	90.689	203.396	142.54	199.69	126.203	139.918	112.211	102.588	103.947	118.866	130.734	256.488	394.244	343.983	373.672	141.316	413.239
NM_001008899	416.235	1449.31	739.196	825.133	606.325	658.407	1658.86	949.487	1476.52	935.602	1390.34	4323.07	1912.04	2772.59	2241.61	1936.18	2938.21
NM_001008900	32.9211	51.2743	35.2546	35.9413	50.5409	29.1605	41.8558	42.2622	29.0721	56.8307	61.7045	94.9066	154.143	84.0829	60.9196	70.0875	94.8782
NM_001008902	20.0866	22.1566	18.074	25.0712	20.86	19.3764	23.168	26.9507	22.5769	17.2322	23.8876	66.2158	61.8307	101.378	67.876	66.6626	56.9382
NM_001008903	12.7345	13.8238	14.2402	11.995	11.6012	12.3567	14.7863	14.4785	14.7054	13.7687	17.8985	49.6012	51.2938	64.6663	67.779	49.8927	66.0116
NM_001008904	17.7481	18.9736	16.1781	16.2094	17.8776	20.5991	18.2052	17.1322	21.9272	22.947	21.4709	63.6111	54.2655	52.8541	66.2353	53.3089	76.3736
NM_001008905	10.1714	16.1433	16.9571	13.524	13.2454	11.8159	12.3395	11.6508	11.8299	11.1333	13.7886	57.9594	88.2407	85.548	77.9053	68.8917	119.416
NM_001008906	17.0738	19.7901	17.7362	17.2939	15.9185	21.0062	16.2297	22.9532	15.7053	17.3802	17.9772	45.0373	45.3398	47.966	46.4821	44.4415	41.3569
NM_001008907	12.4943	14.4855	12.364	13.7569	12.8683	14.2903	10.452	13.8949	15.0181	12.9829	15.1607	57.6659	76.9734	69.8376	71.2944	49.1108	52.4496
NM_001008908	52.5229	70.0347	70.9558	91.3111	49.6918	48.8923	50.3932	38.4843	38.4069	37.5981	23.8326	118.295	224.965	122.887	188.812	122.579	200.406
NM_001008909	12.8006	15.8566	14.0859	13.1457	13.6584	10.8688	10.4396	13.0512	14.5146	15.1146	15.3869	82.9455	48.5556	93.0111	69.2674	113.817	63.384
NM_001008911	33.3428	37.6928	42.7641	36.6301	51.6935	76.8167	63.9691	39.0869	56.5541	39.0689	59.4198	105.335	131.954	85.5103	127.444	72.881	124.48
NM_001008912	11.9732	17.0688	14.1256	15.4243	15.0733	19.8749	14.2728	18.3273	17.0127	14.2511	15.1199	82.9938	71.1695	50.0322	62.4542	57.0458	80.1818
[truncated: 24,421 more rows]

## Sheet: P_RAW
SEQ_ID	F3F2P	F3F1P	F6F2P	F2F2P	F7M2P	F5M2P	F6M4P	F7M5P	C2F1P	C3F2P	C1F3P	C4F3P	C5M4P	C5M2P	C3M4P	C5M3P	C4M3P
NM_001000000	60.7203	91.4629	82.2436	66.2569	66.7633	56.3334	74.0599	72.9607	59.1212	60.6686	51.0651	83.4155	102.913	75.5155	94.5275	75.6568	59.6351
NM_001000001	273.653	442.742	196.1	318.475	181.454	137.035	156.718	147.549	208.761	239.092	176.593	211.673	198.882	234.538	151.923	186.404	154.093
NM_001000002	975.55	1328.99	765.725	1690.16	745.054	556.168	508.522	421.327	1056.93	629.005	301.751	868.316	1029.22	1194.59	469.919	905.701	359.585
NM_001000003	209.589	357.517	364.532	788.441	213.094	240.733	331.309	219.622	302.341	308.234	192.96	398.832	254.136	270.607	185.609	263.134	147.893
NM_001000004	539.86	679.397	180.844	373.33	380.67	173.89	152.152	82.9493	307.89	262.439	118.196	155.792	360.028	234.749	127.657	155.433	142.415
NM_001000005	77.1337	112.507	49.6684	53.7662	49.9124	47.0513	62.8935	58.7824	73.3337	59.1953	42.7182	40.5125	92.0339	62.2494	43.883	77.0559	36.3342
NM_001000006	297.293	324.951	161.328	312.414	112.978	130.971	141.76	68.7771	172.14	225.901	85.6525	159.91	198.172	171.355	92.712	129.754	70.0143
NM_001000007	731.013	964.446	493.416	918.002	416.603	214.315	192.726	139.651	262.295	469.714	239.024	256.506	249.356	587.306	258.013	330.785	210.409
NM_001000008	570.769	371.213	226.21	326.965	286.216	192.807	142.282	120.27	208.541	250.531	108.019	146.033	356.855	273.303	182.987	137.387	113.751
NM_001000009	568.357	609.677	458.185	618.833	193.19	309.533	205.982	236.672	201.575	477.564	266.274	336.443	202.444	331.627	281.536	355.859	240.96
NM_001000010	293.649	352.46	175.579	456.159	144.858	168.892	248.045	97.2018	359.635	180.185	190.478	156.422	242.036	211.734	127.106	222.455	113.299
NM_001000011	497.178	641.918	261.503	716.298	308.636	197.517	196.257	205.271	240.469	375.242	173.784	183.858	224.734	307.446	213.674	358.125	197.857
NM_001000012	98.6416	191.52	105.47	127.931	91.5106	87.0656	79.5895	54.1511	110.737	102.179	64.8078	114.681	89.2748	122.122	93.8096	87.6439	79.7813
NM_001000013	412.729	639.371	231.685	491.491	201.867	140.358	372.644	161.222	321.52	365.378	123.564	195.544	402.944	309.353	116.259	215.287	135.491
NM_001000014	1007.46	1852.82	824.599	1553.64	642.78	446.318	607.833	425.134	933.057	1013.26	319.246	539.521	531.426	795.917	603.381	724.938	396.348
NM_001000015	184.648	292.04	154.502	261.463	129.847	118.649	78.0434	61.5049	105.911	131.341	69.8348	87.8084	101.998	122.755	71.8059	119.379	70.7648
NM_001000016	715.27	919.118	390.853	867.076	334.923	228.292	174.809	174.38	308.339	534.306	209.934	213.82	196.637	459.86	289.879	412.319	180.161
NM_001000017	93.5354	64.5794	61.3831	64.5098	71.2687	44.311	47.7956	43.8843	70.829	73.8288	56.2599	56.0302	56.1254	69.6828	55.4061	61.4473	60.9279
NM_001000018	256.837	257.821	193.055	406.855	247.602	279.326	285.943	190.121	323.469	244.986	266.466	262.558	359.746	412.049	186.077	230.688	107.624
NM_001000019	484.683	321.552	269.026	239.753	442.4	271.372	177.83	214.815	387.3	334.813	228.679	415.065	375.408	357.224	167.192	322.456	181.723
NM_001000020	152.769	241.863	135.905	267.418	155.726	105.614	158.923	88.5544	108.826	171.791	97.1136	77.4569	92.2585	170.832	90.3693	93.0256	74.3724
NM_001000021	381.839	207.806	152.127	211.949	147.027	92.1856	117.438	65.8288	139.593	143.091	156.633	115.715	150.047	232.292	87.1677	95.0826	130.268
NM_001000022	180.936	242.264	193.632	241.104	117.785	119.149	132.268	114.995	108.638	167.764	112.364	117.674	104.044	131.637	142.915	159.186	112.369
NM_001000023	261.416	239.826	149.238	217.435	176.135	113.009	142.427	150.993	249.3	142.673	92.3209	180.995	217.261	222.902	120.84	167.498	167.121
NM_001000024	458.443	598.116	300.855	406.601	458.616	181.312	188.562	129.147	342.334	273.53	221.862	187.733	200.476	322.55	158.197	265.11	132.969
NM_001000025	206.143	319.416	174.694	436.052	142.21	91.1117	60.9126	92.0571	156.123	147.557	101.122	100.307	98.1229	176.602	96.0106	92.4721	96.6864
NM_001000026	226.494	338.215	161.197	269.744	129.051	108.058	93.2839	103.052	209.708	139.701	89.133	119.038	172.472	203.563	96.7364	94.6816	154.894
NM_001000027	548.302	667.759	462.98	880.864	459.251	184.708	166.214	150.571	447.884	318.531	135.231	209.964	342.219	415.201	203.083	259.171	147.393
NM_001000028	85.1808	78.1092	58.1939	57.1083	71.2319	52.6779	41.895	65.1083	50.9078	56.3439	48.17	83.9638	68.9846	61.3468	57.4657	56.6828	72.7158
NM_001000029	523.853	662.407	153.514	408.964	436.687	112.319	230.427	105.736	548.647	208.112	138.254	322.117	503.474	506.104	130.794	239.922	147.4
NM_001000030	60.9611	105.696	87.0432	79.541	170.556	57.0653	68.8685	82.7737	88.5953	44.5038	50.5713	49.2701	56.4435	79.6394	51.707	53.1971	61.2929
NM_001000031	158.224	177.382	80.4561	65.3996	150.668	85.0757	52.4554	68.8487	131.111	64.5566	54.8201	51.547	113.427	147.795	68.6012	64.6458	70.3107
NM_001000032	124.671	271.439	144.039	248.189	234.569	91.1804	129.192	65.202	160.035	122.585	79.9472	70.5284	119.229	295.739	82.3471	135.737	101.504
NM_001000033	87.0561	97.5655	43.4393	85.7177	79.3143	55.7942	58.1261	54.2743	99.1291	79.0818	51.4451	53.3202	82.6738	81.9379	113.558	71.8571	54.4341
NM_001000034	407.024	564.336	338.025	762.934	395.44	383.135	373.467	273.913	495.031	456.914	309.359	375.268	424.826	536.844	578.46	485.626	338.86
NM_001000035	112.445	185.572	120.11	199.807	127.921	78.9191	114.918	62.5896	99.954	132.694	109.491	67.2092	87.7387	88.146	67.6205	119.394	69.4998
NM_001000036	192.708	177.912	193.82	232.669	85.5961	78.4617	122.116	93.8272	113.558	213.893	102.263	135.17	80.4348	82.9116	78.7233	147.08	193.753
NM_001000037	359.996	369.898	316.804	570.593	219.704	170.299	146.404	156.556	200.45	318.052	268.934	165.639	142.815	252.97	167.372	202.407	210.865
NM_001000038	1773.42	1535.55	772.95	1417.71	867.177	520.705	614.687	415.234	826.466	768.485	531.928	452.033	712.345	1033.61	444.911	831.234	515.838
NM_001000039	442.365	640.455	313.54	723.635	493.948	283.776	303.854	222.966	445.222	294.253	269.069	199.028	591.762	962.948	181.453	225.219	186.283
NM_001000040	356.417	416.213	345.622	448.079	289.137	111.513	353.574	371.795	265.432	258.06	363.387	232.593	743.469	508.291	280.238	209.986	318.695
NM_001000041	67.815	81.8578	48.4535	53.0811	57.2248	43.5855	43.3359	39.5465	44.3163	51.0445	42.8148	38.8644	62.1325	57.066	52.2565	47.6967	51.1824
NM_001000042	190.578	287.301	275.717	448.984	91.626	123.776	220.908	105.904	169.84	223.891	99.9526	98.9894	117.685	212.536	90.8921	109.983	71.0776
NM_001000043	142.603	160.601	121.56	170.382	178.048	114.095	79.1009	70.6866	121.848	133.084	80.9872	76.8708	98.7265	122.956	99.7518	137.605	73.3916
NM_001000044	410.287	339.1	232.322	274.268	464.575	120.589	110.334	94.2004	187.856	146.744	137.071	121.296	229.202	256.24	205.29	151.768	185.992
NM_001000045	91.8071	74.4305	155.439	142.06	128.244	101.985	121.719	90.801	91.6068	102.517	74.3198	76.9969	120.176	89.2939	49.7551	120.413	58.5328
NM_001000046	61.7766	60.3686	64.7865	51.101	71.8841	35.1696	41.7864	45.6431	61.7483	52.8235	44.1676	42.0961	48.0744	81.0873	36.1606	38.94	42.9217
NM_001000047	71.1996	78.1517	70.3753	48.7942	120.985	60.1133	67.2182	41.7598	109.386	56.218	47.3036	62.5838	109.028	130.761	43.2913	63.9014	63.186
NM_001000048	70.916	69.3514	70.4527	51.3092	56.1975	44.8968	46.5325	56.1425	56.9153	43.3679	52.9036	46.8995	64.9607	82.9236	49.5635	60.0094	104.607
NM_001000049	216.166	171.993	171.785	80.2475	171.919	66.3704	75.9972	55.1569	181.872	64.352	55.4975	86.1287	176.139	212.776	49.4619	105.828	49.0324
NM_001000050	369.269	416.724	310.201	412.092	437.212	296.995	337.673	269.36	505.794	401.75	270.106	280.317	357.831	327.213	260.505	289.672	276.226
NM_001000051	135.678	141.581	54.0268	104.758	283.332	137.437	119.282	79.558	304.046	62.922	58.8288	142.35	191.973	121.963	66.3992	52.6671	74.2572
NM_001000052	56.4136	77.6014	69.2821	105.792	60.8112	74.1753	49.0531	47.7553	60.1808	54.3779	46.6263	40.1707	49.1704	59.9846	40.3542	40.4312	52.4933
NM_001000054	365.051	409.865	241.038	343.191	147.051	182.905	112.185	98.2256	222.672	236.845	148.987	154.387	209.992	373.125	274.247	285.162	159.948
NM_001000055	109.326	166.679	147.893	102.34	105.665	89.7755	85.2933	110.038	113.292	92.1279	87.7737	102.307	108.676	157.859	123.191	102.679	62.0181
NM_001000056	81.1848	85.5605	67.2625	67.4016	94.0701	53.8123	60.3145	59.3599	77.9375	54.1405	54.092	54.5363	73.937	107.891	42.3108	66.6363	59.0845
NM_001000057	93.407	78.5112	70.0881	80.6999	107.018	70.9287	65.8318	58.8501	63.8145	59.5104	55.9854	73.1208	75.6807	73.915	115.515	55.9987	192.056
NM_001000058	265.682	302.991	188.243	247.956	191.572	154.956	172	157.592	223.329	232.658	135.556	162.889	272.938	359.507	153.448	259.994	131.973
NM_001000059	80.3272	92.1309	71.1676	97.5676	108.738	61.5637	59.8194	46.5511	96.673	112.562	45.3954	69.5942	75.6713	73.4665	55.335	66.0851	55.5914
NM_001000060	207.475	126.691	146.486	155.661	130.788	97.8372	58.5519	76.1468	111.426	87.7086	56.4248	96.6345	132.446	342.322	84.5235	86.2065	74.1386
NM_001000061	58.9733	66.3038	54.8303	47.3764	40.4359	58.8881	42.9595	45.5544	51.763	46.3378	51.8009	48.0983	56.7729	56.1884	42.0786	39.5787	39.6312
NM_001000062	97.8404	78.422	58.6734	64.6045	96.4935	50.3278	44.1435	43.2993	89.1756	54.408	47.2689	48.8426	80.121	85.4621	65.3893	54.705	50.8463
NM_001000063	99.643	96.1455	74.0483	67.3355	81.782	56.1996	53.3385	44.1933	64.9826	58.0055	78.7583	46.9185	63.865	77.1936	62.2548	58.6719	62.4509
NM_001000064	50.0407	60.9082	60.2709	42.8105	51.4036	34.2335	44.9501	38.6244	56.1595	43.0466	36.2928	55.2095	58.5958	44.2647	54.337	56.5778	115.987
NM_001000065	180.796	179.205	101.602	139.252	91.8371	75.1835	95.9562	52.4791	106.825	149.121	66.5933	95.0806	105.103	122.377	64.8326	96.9955	61.3338
NM_001000066	195.11	156.373	144.932	259.147	99.047	77.254	79.6106	54.0684	126.216	111.831	74.5832	62.6577	62.7749	144.613	81.7558	149.112	80.7597
NM_001000067	91.8991	93.1432	82.0116	211.517	87.4638	84.4043	71.0833	74.3005	62.4209	67.6234	52.8752	71.601	104.332	126.862	74.5997	73.1748	63.8433
NM_001000068	115.04	194.172	156.686	108.125	120.09	67.1515	59.8746	164.081	121.208	114.485	78.6997	81.2742	95.1326	167.997	94.0358	76.6155	42.5126
NM_001000069	69.8247	72.7744	58.7198	121.89	55.4976	63.5466	48.6385	66.0292	60.7483	63.3403	69.7538	52.3634	55.8791	81.1695	58.3556	139.005	44.903
NM_001000070	158.643	136.786	141.485	162.06	85.7288	126.894	91.0934	77.7801	83.4238	110.721	85.9668	98.7498	115.614	104.216	86.4508	159.883	91.4979
NM_001000071	108.756	116.346	73.338	112.338	77.8816	61.411	43.7213	47.9839	86.473	89.9046	52.9052	61.9547	69.7652	105.377	66.582	59.6861	50.1304
NM_001000072	94.7234	69.2263	90.0511	123.742	50.8514	74.494	50.9421	41.9716	64.9231	71.295	44.9543	60.2162	54.0108	65.7512	54.1954	67.0471	53.1932
NM_001000073	63.2412	90.5513	66.1967	80.7351	55.8394	66.4535	52.8827	50.7742	66.2955	68.4456	44.4146	72.9584	55.1734	69.0084	51.7152	60.8617	42.047
NM_001000074	393.579	275.529	223.681	414.425	228.687	240.93	251.112	178.881	243.691	417.678	232.289	189.724	166.45	219.196	290.039	293.261	397.838
NM_001000075	106.665	126.922	46.2628	67.0474	181.252	65.0612	84.7686	96.7014	198.788	36.3551	47.3543	55.6981	148.214	135.4	56.174	95.6728	62.1707
NM_001000076	113.024	115.897	102.383	73.6089	126.025	52.4945	50.8542	68.2749	82.8018	67.2469	47.3984	63.5712	109.889	102.632	57.9426	48.0252	70.6968
NM_001000077	742.781	992.528	455.34	809.487	573.111	270.757	196.745	138.317	385.248	409.475	209.301	276.455	385.092	622.684	235.252	381.421	190.699
NM_001000078	229.876	201.331	141.294	208.766	134.806	82.9286	120.147	132.292	137.124	217.594	139.095	122.376	126.836	174.51	132.25	147.839	79.7597
NM_001000079	141.589	255.616	181.634	257.083	152.715	108.433	69.594	65.2505	89.5649	154.163	63.2446	66.2673	104.249	181.603	153.614	75.372	56.061
NM_001000080	110.488	104.385	110.73	100.28	73.563	78.0592	77.84	58.3873	68.4806	105.833	74.2018	70.5227	48.5545	59.7583	77.5567	73.0479	58.1446
NM_001000081	138.035	133.043	64.5479	109.102	91.3681	53.9575	71.3557	48.0197	88.8895	72.0758	71.0613	57.6801	73.6827	108.427	49.7995	57.5779	53.0143
NM_001000082	72.182	88.5619	245.941	226.836	105.215	215.629	160.131	150.337	111.377	243.022	134.623	196.253	109.147	109.114	111.269	214.838	201.56
NM_001000083	251.952	341.543	166.326	277.791	253.691	125.034	112.708	120.545	277.132	132.675	121.115	145.002	234.803	307.287	109.749	122.903	174.18
NM_001000084	136.228	116.36	104.653	238.592	58.2688	63.3777	66.012	59.9668	84.3241	131.323	86.0147	64.38	73.592	83.9728	73.7022	71.9784	106.701
NM_001000085	93.2602	93.8663	74.1923	80.0376	156.255	75.8869	70.4123	80.6331	85.6665	78.5346	65.6592	53.9404	70.9591	155.994	49.7308	95.0797	59.7036
NM_001000086	103.532	91.9979	81.7027	80.5472	73.263	69.76	115.438	65.885	75.9151	55.4986	79.7269	58.8891	79.7399	165.125	84.3358	72.2796	53.2855
NM_001000087	247.144	272.874	108.335	243.883	144.158	110.597	77.9974	135.157	176.425	98.1188	102.424	142.331	433.599	243.67	127.172	133.65	64.3102
NM_001000088	66.0171	62.1807	55.2698	50.592	75.1623	49.869	58.9467	44.8714	51.6577	53.5974	53.6358	47.3382	80.4123	75.78	49.3927	66.554	64.7258
NM_001000089	310.957	166.869	113.042	83.2614	172.976	83.3596	85.6908	72.7237	88.3411	104.438	67.8834	87.153	125.27	244.248	92.0571	141.276	100.857
NM_001000090	74.2618	87.0081	74.7536	86.8366	60.1226	66.598	49.8499	48.2651	65.8249	73.8094	79.0019	39.312	59.0968	103.445	44.9937	38.8107	60.6708
NM_001000091	189.371	64.3166	51.5038	45.1426	59.4685	78.1816	51.2282	45.1048	51.3234	52.6473	61.9566	75.541	140.723	114.409	50.0677	58.0084	85.6415
NM_001000092	74.1992	79.9275	51.3228	56.2636	59.2718	68.4788	55.3463	60.0433	62.6255	66.1687	54.9505	54.6319	94.1121	92.3214	66.3809	82.9043	53.387
NM_001000093	66.939	122.137	72.5692	100.703	94.0783	49.336	110.33	50.0045	86.321	73.139	52.5805	53.4149	43.0653	61.2044	66.9227	57.8089	103.036
NM_001000094	275.431	307.69	159.599	153.05	122.51	87.2243	100.509	113.952	152.484	167.884	63.6273	121.995	153.636	255.225	134.901	106.958	51.9022
NM_001000096	139.998	193.393	123.548	74.9206	105.263	95.4059	89.086	93.9703	103.189	84.3312	52.5917	75.3704	112.487	119.033	77.2411	88.7954	114.253
NM_001000097	161.573	100.247	81.191	108.117	68.3159	70.0417	70.0318	64.8218	68.164	84.7749	89.6781	51.3465	71.9232	109.866	82.6758	88.1166	61.6543
NM_001000099	239.743	196.822	69.1386	130.175	112.736	75.0655	68.7769	84.4685	197.335	97.493	100.18	108.881	133.964	177.285	116.451	121.715	133.184
NM_001000100	209.511	263.313	87.9985	199.435	126.951	83.0878	97.9581	80.1191	149.472	112.208	77.0176	108.656	186.759	191.791	54.4618	115.153	78.7583
NM_001000101	893.12	1375.97	533.132	1679.93	635.531	325.924	620.084	243.497	975.176	510.729	452.339	444.276	742.828	961.286	593.228	695.501	500.403
NM_001000102	105.57	118.3	108.743	82.8416	106.871	63.0478	55.7487	59.1551	114.683	60.8095	71.0159	62.773	98.881	131.384	90.3715	75.6947	79.8319
NM_001000103	67.7472	76.6394	51.4967	68.4572	93.0457	91.1468	66.9703	43.5367	82.6414	72.6543	76.6959	65.4071	63.6052	75.414	55.8553	55.3414	65.7742
NM_001000104	87.6012	96.3117	60.4221	122.883	135.436	73.7218	80.1063	83.1827	104.116	75.1107	55.8056	73.108	110.183	93.3422	73.1208	77.0559	58.2568
NM_001000105	101.533	93.149	77.3623	88.5851	76.8229	88.2978	64.7902	63.1981	72.9332	60.0385	61.3657	56.1142	56.8727	68.3379	62.1529	77.6586	76.3351
NM_001000106	46.6748	48.486	46.0334	47.9213	58.2896	48.433	47.9284	54.6408	62.584	42.4984	39.1132	48.6756	77.2878	46.8798	95.6686	39.5002	49.3949
NM_001000107	78.003	58.0192	56.7824	51.0545	53.65	44.4252	59.9503	35.0628	54.8403	46.6003	51.489	50.723	55.1037	59.2466	55.4468	37.5326	44.3561
NM_001000108	49.6362	62.9641	56.3692	56.2868	60.2602	57.2657	62.064	41.8118	67.3907	47.7782	49.2295	54.6634	59.4096	57.811	45.7339	54.751	41.9899
NM_001000109	135.196	122.898	94.4995	100.858	129.099	83.357	78.2198	76.2283	199.363	112.428	91.8661	76.1847	75.0524	122.846	67.0764	88.891	60.086
NM_001000110	130.425	187.732	97.0419	192.137	106.018	96.7958	112.144	91.1486	156.79	126.426	111.743	111.635	132.765	133.97	104.476	126.432	108.908
NM_001000111	190.014	321.531	178.428	234.01	155.363	115.99	97.6016	84.2534	183.494	188.998	118.928	141.247	182.422	188.988	117.631	125.397	92.819
NM_001000112	83.8207	115.66	65.5113	116.853	75.7887	51.8528	70.8166	57.4736	84.4913	101.562	57.6091	53.6755	68.1426	104.675	76.0808	60.7008	55.9292
NM_001000113	90.8843	123.267	67.9959	70.3697	85.989	61.7211	75.2492	45.9738	88.8454	92.4423	65.1224	55.4038	79.9508	77.9388	53.1694	82.6724	57.7385
NM_001000114	320.258	437.84	241.582	306.568	212.677	138.277	125.037	116.312	283.708	164.137	66.1831	190.201	230.528	378.209	113.426	131.003	170.775
NM_001000115	166.534	132.496	132.248	93.7413	84.9767	61.0206	74.0993	60.6745	73.4544	103.627	65.8422	63.4644	53.6955	123.114	115.037	103.626	75.1861
NM_001000116	62.0566	79.3658	70.9282	48.24	152.086	44.5583	54.086	52.448	44.2854	52.331	51.5798	54.086	49.7117	62.3395	69.0941	53.3792	67.6492
NM_001000117	160.329	131.148	135.546	81.8286	106.634	62.2571	57.4527	68.718	113.867	65.9151	66.1266	55.7473	79.6897	91.5761	92.9207	70.865	78.6404
NM_001000118	139.955	196.333	115.862	131.778	128.891	62.9275	61.4604	63.6757	124.584	60.8459	67.2473	105.117	146.608	139.913	46.2601	69.57	53.8271
NM_001000119	151.262	140.928	79.871	85.7207	104.953	64.7038	70.8635	51.7239	80.8782	66.7712	59.6772	64.6328	69.4331	98.9598	75.5448	98.2772	52.9283
NM_001000120	231.393	237.371	166.016	206.832	188.927	130.901	225.611	75.926	157.502	334.76	72.7189	102.999	209.274	199.961	95.2345	180.873	102.322
NM_001000121	484.524	493.758	112.325	670.094	324.683	198.412	243.58	259.574	502.091	279.54	92.8254	133.461	288.033	380.387	162.557	182.398	193.54
NM_001000122	81.9427	135.433	170.896	149.188	95.3389	78.4144	92.9768	140.509	87.1662	127.333	86.5562	121.976	66.4179	135.078	60.3662	111.162	114.297
NM_001000123	124.766	209.472	203.578	221.102	143.303	128.229	140.371	116.508	118.807	164.265	112.17	156.927	64.9051	90.4612	217.263	114.629	90.7224
NM_001000124	77.8186	110.756	166.344	78.2309	78.2773	103.602	85.0916	108.868	101.915	107.03	65.0392	100.178	68.1067	417.696	149.323	86.2475	173.164
NM_001000125	391.592	571.506	217.632	465.429	305.974	168.765	153.487	150.23	379.794	214.174	124.385	160.263	239.115	428.417	94.3188	121.999	111.764
NM_001000126	202.097	188.28	285.209	173.415	147.187	162.836	177.78	112.041	212.699	115.612	126.734	190.912	237.143	169.372	138.333	238.119	128.21
NM_001000127	86.707	103.751	65.3211	64.0264	76.4432	64.7012	49.1612	43.3794	64.7352	88.8732	48.653	53.575	58.3153	105.749	72.436	59.9424	57.9601
NM_001000128	96.9305	141.143	115.975	116.279	74.6152	84.4467	89.169	86.9499	129.933	110.606	100.189	121.661	92.7987	109.005	89.8665	149.235	88.977
NM_001000129	369.972	395.923	335.149	404.62	328.72	135.985	143.733	150.387	133.706	329.536	164.851	99.1342	208.219	276.061	112.17	90.6161	80.0011
NM_001000130	289.676	181.682	157.399	187.611	188.048	122.955	112.073	102.296	103.484	149.535	117.141	133.712	178.864	178.18	134.7	133.974	122.758
NM_001000131	108.023	105.368	63.0864	100.129	84.8494	56.4669	88.2031	52.9455	56.2162	63.6243	86.3833	39.0191	63.0876	85.1958	81.5691	92.1379	50.9544
NM_001000132	246.158	285.623	197.508	275.336	90.1916	175.57	96.6186	187.941	93.9963	211.058	143.039	154.611	156.803	124.451	208.074	102.955	128.946
NM_001000133	374.271	440.355	270.023	608.001	286.822	324.024	239.048	195.854	274.649	369.814	208.034	197.259	281.014	308.159	207.871	315.272	214.103
NM_001000134	162.155	217.348	190.658	211.58	103.941	116.987	61.2659	80.3628	113.294	129.885	125.114	75.6854	67.5932	122.564	83.6878	115.485	52.9018
NM_001000135	98.3051	116.62	96.1729	96.2827	80.5484	49.6229	71.596	52.615	113.695	55.9264	65.599	58.1032	88.3081	114.562	81.5493	59.9371	63.6377
NM_001000136	187.765	140.805	99.0723	92.67	94.2854	70.3009	76.0777	95.4727	100.918	100.056	72.3524	72.4881	89.9774	110.001	81.6647	159.97	91.884
NM_001000137	67.5678	75.9541	73.8233	70.2907	70.2064	73.2093	76.0473	68.4695	58.6596	63.823	54.3674	69.3793	73.5724	74.325	65.1694	74.8107	73.7421
NM_001000138	90.2997	122.764	78.7193	73.0382	109.934	63.102	70.0825	88.2699	102.694	74.1493	63.8743	82.2287	207.107	154.617	92.9947	92.6925	68.5651
NM_001000139	315.091	232.697	151.227	148.13	236.941	103.061	108.174	60.2096	227.867	149.693	110.47	87.2407	76.3232	167.817	125.742	93.6002	62.9514
NM_001000140	81.8585	99.1219	100.099	100.124	63.4429	80.3448	58.8153	72.8268	94.702	91.3759	62.1517	66.5009	70.3319	93.0663	62.6997	71.3053	79.2456
NM_001000141	83.5467	88.3065	86.4083	129.784	67.6971	80.0898	82.9297	112.855	80.1274	125.504	105.458	141.77	68.9663	91.3534	99.2798	113.371	96.7654
NM_001000143	86.0543	109.112	59.245	55.3088	60.4162	115.17	47.453	66.7085	116.171	62.4942	52.9039	90.0271	121.005	174.7	64.2743	51.1738	56.1889
NM_001000144	255.878	219.351	201.688	162.454	169.445	197.794	116.998	56.1478	152.172	109.993	76.4207	88.256	172.987	238.728	97.8497	103.249	136.881
NM_001000145	193.964	183.541	262.145	198.826	105.449	109.747	97.0048	78.9212	128.441	167.65	125.357	110.071	145.719	140.194	107.608	107.904	115.634
NM_001000146	92.9524	122.244	260.116	136.74	99.9041	104.188	67.1587	51.4569	117.17	89.4062	51.3466	80.3583	73.9515	143.261	76.2313	90.0781	167.958
NM_001000147	97.1113	83.0093	87.1963	105.084	67.3831	77.5459	69.626	49.0622	72.8941	91.8155	58.3677	82.0253	86.7855	107.073	52.1805	60.1782	45.2718
NM_001000148	122.278	104.738	78.7347	113.513	111.587	62.991	59.2214	71.3959	117.722	62.046	63.3045	71.7696	177.106	134.493	86.6914	67.1038	58.0676
NM_001000149	178.481	245.435	98.973	133.812	130.992	70.1594	85.2836	67.2079	144.819	63.4201	108.433	71.3867	109.799	163.917	63.2431	88.8917	69.2908
NM_001000150	54.3116	58.7104	59.0022	55.4142	57.8809	50.6165	43.651	46.973	81.3224	42.0542	44.1318	48.04	53.998	58.9395	46.6751	51.9442	46.3399
NM_001000151	109.883	107.456	84.5357	182.62	200.887	75.4555	94.3013	69.8977	113.42	111.382	100.676	92.2284	82.7732	103.153	82.496	84.1204	98.9149
NM_001000152	213.287	244.104	130.512	202.301	96.6907	77.9007	79.9232	82.1286	167.871	113.286	127.606	98.13	99.192	116.712	79.4122	124.875	99.2237
NM_001000153	123.378	72.5659	54.8749	39.8355	62.6282	46.1879	45.8394	43.6607	57.0278	49.0924	42.0488	48.5368	55.5896	68.3877	42.1955	43.6127	44.3626
NM_001000154	341.05	322.499	261.968	375.546	276.206	117.851	121.218	134.448	162.81	178.854	87.3625	119.133	206.555	292.628	122.977	175.6	95.1262
NM_001000155	59.0843	73.0542	67.9891	71.4584	55.8332	57.4429	61.2844	46.8393	64.7775	49.5634	54.6158	52.3498	138.631	80.1786	48.2815	60.9843	47.2488
NM_001000156	252.723	219.487	205.158	263.047	185.06	156.232	113.798	93.5652	120.089	207.377	120.914	121.955	90.9453	181.618	215.729	155.883	118.306
NM_001000157	77.3478	87.6029	93.7255	110.549	163.851	59.7069	51.5462	86.4554	78.2927	60.7291	63.7695	65.5642	107.569	68.0462	60.5915	66.2002	76.5639
NM_001000158	73.706	64.728	60.0176	55.5841	81.2794	63.7361	53.9383	50.6628	57.8743	51.0588	38.7114	54.4982	43.1321	64.6483	49.2033	59.5203	61.5441
NM_001000159	89.7125	134.847	164.513	150.359	206.47	84.3312	68.691	122.111	226.47	81.3388	91.8295	172.111	102.254	152.411	82.7665	273.104	86.9851
NM_001000160	91.9	128.407	71.511	79.541	89.4488	71.9768	66.7249	76.0139	69.5381	77.9024	75.9599	47.8596	105.792	133.627	79.633	57.0536	56.7839
NM_001000161	369.835	787.133	387.154	530.386	319.93	157.202	123.132	121.783	302.387	177.031	143.465	188.578	168.93	430.844	165.51	200.304	169.901
NM_001000162	178.606	224.825	220.856	457.119	125.544	112.654	131.995	119.591	83.2584	273.404	139.544	106.129	69.007	166.918	129.835	122.589	125.783
NM_001000163	315.162	493.259	139.983	159.822	520.022	96.0562	97.0855	98.4573	442.262	175.502	132.303	124.485	182.648	666.831	135.108	153.634	169.283
NM_001000164	137.199	86.7993	76.3941	102.419	98.9029	77.9992	93.0432	67.4693	76.3445	71.9354	54.9192	69.7803	77.4244	87.5116	128.38	80.8612	109.117
NM_001000165	212.236	220.517	203.26	256.399	175.783	161.436	180.52	206.947	210.953	172.954	202.493	165.273	144.315	187.498	190.421	153.224	112.919
NM_001000166	45.4829	66.0358	61.4298	44.4607	62.53	106.01	43.6106	47.1302	58.2256	64.6247	51.6463	66.1396	61.0873	72.5281	45.4618	53.6686	67.381
NM_001000167	101.472	103.105	115.013	90.2422	118.501	71.6993	83.1056	85.8607	114.999	97.2978	84.2163	94.7232	106.243	136.1	102.564	96.2677	96.6192
NM_001000168	197.306	362.579	190.41	171.424	226.556	97.3281	148.719	91.1287	168.715	149.377	128.841	109.507	279.947	264.633	96.984	88.8385	108.618
NM_001000169	236.387	245.322	61.8822	99.9063	159.469	71.1896	69.296	54.5281	185.348	71.6569	81.8395	72.114	174.241	163.548	65.3022	80.5234	71.7473
NM_001000170	184.946	330.269	132.045	280.173	305.61	98.8524	118.134	145.635	105.815	223.493	127.946	82.2452	100.002	266.216	108.419	255.952	132.376
NM_001000171	253.638	176.4	174.249	228.294	111.808	99.159	88.4285	100.493	91.1185	147.719	88.4553	89.759	174.443	166.153	92.853	133.808	81.3364
NM_001000172	184.115	220.264	91.1987	113.825	119.587	70.269	49.0884	79.1465	117.154	92.5524	58.0237	58.5394	96.5033	147.467	91.3813	75.4607	61.766
NM_001000173	215.174	241.492	126.324	162.698	157.97	86.0244	77.0692	52.4549	92.9654	163.997	80.4258	59.5777	99.0587	136.237	94.3153	116.103	81.0229
NM_001000174	164.175	164.032	86.6659	180.437	126.962	99.77	75.6594	94.7132	98.6697	72.8053	75.6968	88.2021	121.822	181.864	71.5843	75.1978	75.0096
NM_001000175	149.361	137.842	74.0138	262.477	72.4135	68.3481	75.8719	48.679	78.8984	205.014	59.0826	68.4832	61.5611	57.0353	64.865	90.6821	58.7419
NM_001000176	81.3269	72.5894	59.8125	61.1348	82.5421	83.5151	46.75	54.3588	83.6262	82.3123	63.2749	70.6866	43.2984	75.6028	73.3945	67.7861	69.3318
NM_001000177	138.315	301.047	172.187	210.476	128.219	94.8496	109.102	66.2456	169.441	153.16	68.438	87.5913	181.458	181.568	67.5169	105.145	68.4828
NM_001000178	114.245	106.164	114.591	172.111	71.0823	95.0638	141.117	63.5506	77.8364	102.96	71.2121	82.1936	62.17	73.8358	81.0169	97.5834	61.037
NM_001000179	97.8084	112.192	108.55	57.5096	57.5567	93.7341	52.6422	50.1753	67.839	54.0131	45.0194	65.5027	126.458	84.6546	66.1832	51.4648	66.2421
NM_001000180	191.554	120.673	105.051	145.232	69.4458	51.9465	93.8335	75.6586	64.8711	85.0452	62.7774	58.3028	81.5887	67.0264	72.7983	113.624	76.1868
NM_001000181	158.1	165.017	74.717	111.606	193.874	59.7419	82.8808	100.387	150.31	70.981	169.979	61.7758	124.376	163.85	57.702	107.378	69.0415
NM_001000182	154.787	225.814	130.977	240.817	131.61	85.7717	74.918	95.4838	96.2976	156.225	117.653	75.1204	83.293	144.124	94.4739	91.4809	53.9931
NM_001000183	219.006	147.834	182.753	157.864	105.995	87.648	78.9961	72.9564	125.249	143.246	96.9232	148.12	104.859	115.59	78.359	105.596	71.8164
NM_001000184	76.3504	66.7019	63.8901	49.856	64.5264	46.1879	44.19	34.1634	52.8755	57.2701	46.2018	39.1468	43.556	67.1842	37.7599	50.3153	51.8468
NM_001000185	104.417	131.492	112.716	84.8045	119.748	63.8682	78.9039	59.2731	83.1986	77.2841	65.7024	64.6562	54.0054	84.5569	79.0708	74.6471	83.2769
NM_001000186	132.03	139.924	140.549	172.899	92.6472	78.015	88.5928	80.1827	106.993	127.838	107.139	103.511	63.7519	93.0272	75.7763	89.6489	72.1628
NM_001000187	128.189	206.556	112.943	163.556	106.9	95.3645	75.2716	83.8935	87.484	95.0945	109.881	63.2821	124.221	144.282	95.5616	65.8743	72.3375
NM_001000188	165.852	149.007	215.57	289.987	76.6918	79.9301	107.572	81.1861	117.065	102.99	65.8501	76.3981	63.4103	150.626	60.0739	133.767	75.459
NM_001000189	85.7101	181.125	90.1908	94.2531	112.939	125.332	67.1538	56.0397	107.038	84.9093	84.2191	61.7477	80.5416	104.671	80.4397	83.9636	87.7533
NM_001000190	66.1543	103.728	63.2821	71.1966	101.738	58.8834	50.2139	55.8539	123.847	60.8459	53.7574	56.4429	84.6174	116.456	41.7223	64.2536	53.1304
NM_001000191	286.363	429.797	180.795	292.029	312.243	121.196	166.152	151.111	296.324	178.466	205.22	199.3	231.278	331.553	210.411	190.152	223.414
NM_001000192	102.116	219.741	123.049	113.772	86.9219	64.5815	69.0004	54.1649	119.914	99.9283	54.4482	63.0637	88.9569	145.453	48.0629	83.6792	48.7807
NM_001000193	174.536	226.407	113.843	99.4997	144.462	59.8955	47.7968	54.2743	89.1553	89.8486	56.7278	68.0466	122.482	130.214	50.9918	86.3774	82.4464
NM_001000194	124.538	239.695	146.57	219.314	116.879	86.9213	118.915	118.612	170.616	102.837	75.1802	87.8762	96.056	138.659	81.0648	146.898	145.474
NM_001000195	76.7116	111.693	113.565	103.768	96.5335	90.3015	84.1252	83.1658	91.8847	88.482	72.5491	71.438	62.2527	88.3144	98.4293	76.7624	80.826
NM_001000196	157.747	147.806	127.03	89.2869	79.984	79.9541	66.8976	66.0357	95.1977	82.7747	53.9968	90.5604	96.4827	97.0835	85.6568	79.2275	59.7423
NM_001000197	173.563	145.644	157.522	278.055	94.8897	125.385	94.7327	86.8247	133.398	165.815	96.4145	104.376	89.9013	116.307	83.2809	105.429	111.712
NM_001000198	139.921	198.845	121.034	136.129	191.889	241.547	94.5665	108.804	90.0453	105.383	66.3704	198.006	142.902	189.943	141.295	134.251	236.539
NM_001000199	109.399	180.295	79.8716	158.672	119.567	73.7011	111.53	105.377	130.759	88.682	164.645	80.7746	70.8866	127.867	98.1867	105.265	90.541
NM_001000200	464.695	558.61	386.59	843.01	612.809	319.919	330.877	233.093	655.295	384.958	179.477	350.343	617.39	548.196	238.902	336.157	180.744
NM_001000201	90.551	111.382	116.801	154.637	59.6513	84.7034	63.0491	54.1408	74.599	79.2825	328.629	52.1982	64.9913	109.443	82.7653	108.823	176.002
NM_001000202	123.328	97.6257	89.6355	91.9572	81.7215	68.7594	70.4886	51.5165	56.8509	79.0879	75.3734	47.2823	119.23	79.147	66.808	73.5872	43.1097
NM_001000203	157.071	199.565	214.833	299.155	185.241	168.725	169.716	147.111	149.243	273.07	155.267	251.975	138.018	143.823	391.517	218.822	216.715
NM_001000204	104.989	205.771	94.2019	120.308	148.288	93.5391	89.0813	113.243	189.931	97.3698	60.1157	77.2549	109.06	185.678	87.601	170.045	76.8492
NM_001000205	46.361	48.5233	42.7696	44.8101	66.3049	38.787	75.9942	44.8442	43.4643	40.9218	37.8895	41.2199	42.1602	43.6468	44.8087	43.7955	45.9705
NM_001000206	381.115	136.963	69.6516	95.9934	68.9643	94.7583	86.0188	64.6088	79.6255	95.1311	81.543	63.1579	71.3521	95.7324	80.7757	66.4093	67.3537
NM_001000207	134.897	154.655	106.523	127.851	111.266	66.8036	64.1943	56.7939	77.3941	87.693	66.715	62.7742	63.476	188.974	93.8125	94.9221	57.6961
NM_001000208	55.6239	79.7477	67.6294	62.4507	53.444	54.5855	49.218	55.1993	52.8684	60.5919	46.9811	45.3621	44.7707	61.7704	58.1018	53.1586	51.5346
NM_001000209	291.487	337.31	138.832	211.472	169.873	92.6132	176.238	83.7721	296.126	124.098	81.3209	125.994	194.952	232.885	122.811	146.713	159.313
NM_001000210	76.3736	85.0412	69.11	86.2289	49.8085	47.3693	49.7499	49.0894	57.486	70.7915	48.3522	43.3647	46.6113	89.8271	53.7507	48.2386	76.8096
NM_001000211	222.149	146.008	131.885	177.283	115.241	94.1126	111.996	78.3935	132.803	131.943	168.841	87.2667	139.89	96.529	143.55	146.127	108.714
NM_001000213	124.471	67.0446	71.4146	61.6897	88.2456	53.3768	47.2236	55.848	65.5363	63.4066	49.7426	53.6553	54.2704	71.753	51.7148	70.8417	111.822
NM_001000214	71.9128	72.611	57.8687	59.7681	80.9768	44.5484	52.5848	83.6657	84.09	46.6386	58.471	40.7854	65.3082	161.439	48.662	43.6471	49.8802
NM_001000215	72.8643	70.095	44.0436	38.1689	55.5098	43.9723	44.2705	35.4167	63.4486	47.3597	41.2175	39.6484	70.812	54.82	39.0508	45.2772	42.9289
NM_001000216	70.0454	64.4667	58.5572	51.414	96.5549	51.454	49.9582	198.985	74.8214	51.8885	57.3644	47.686	113.819	76.9895	72.3023	113.817	48.0423
NM_001000217	151.214	79.1903	69.5691	50.5348	73.4501	39.5346	40.3991	36.2186	61.0505	43.936	33.0218	124.36	92.2479	75.505	52.1825	74.5748	45.0167
NM_001000218	233.787	196.292	86.295	157.327	259.264	60.1085	55.1773	50.6932	160.225	58.48	58.0296	62.3296	194.329	419.908	99.5831	63.7559	55.0007
NM_001000219	157.982	158.376	84.6035	111.845	96.4149	57.918	54.097	51.234	92.9321	63.8971	87.1967	77.116	123.046	109.747	50.6422	82.0044	62.696
NM_001000220	219.569	249.804	180.315	199.308	144.033	104.319	101.6	86.8588	137.56	106.787	78.067	92.4653	209.332	291.453	111.302	136.229	94.1998
NM_001000221	58.5409	61.0952	56.849	69.4197	45.4711	55.2492	50.2628	48.8469	63.4536	42.1723	49.4678	54.9555	81.9096	76.9253	38.4972	55.1312	52.6387
NM_001000222	85.1671	98.0823	54.9419	65.4921	78.8793	49.9833	70.6139	60.1277	71.3463	54.9948	44.8599	53.3555	75.7051	119.378	45.782	63.2056	64.3821
NM_001000223	187.884	216.157	132.029	98.0667	134.585	63.9946	62.46	84.9399	105.497	97.6634	65.8008	61.7186	81.2314	135.703	67.3425	86.6398	88.1368
NM_001000224	405.158	481.942	369.195	469.646	326.097	292.218	420.634	318.597	327.527	271.508	187.868	283.42	537.614	425.543	217.39	200.622	237.733
NM_001000225	113.628	256.945	326.993	655.867	159.894	165.718	224.47	162.784	145.766	342.872	168.991	188.561	113.983	171.651	143.981	170.814	123.561
NM_001000226	86.3878	112.135	102.789	79.109	79.208	54.9257	58.529	37.5897	70.049	62.3054	43.5244	48.3595	63.4212	114.8	44.3241	52.6667	46.0135
NM_001000227	171.528	133.99	121.221	146.765	92.9152	134.932	145.892	86.5179	152.292	115.025	83.2044	129.06	145.547	119.222	92.1122	120.193	43.1031
NM_001000228	481.859	580.088	326.327	751.856	311.675	220.807	423.929	170.437	334.247	412.256	165.852	352.106	445.569	345.745	141.424	334.512	137.25
NM_001000229	240.44	243.105	119.468	176.301	161.537	81.2676	98.9463	89.4683	159.729	114.539	60.8996	177.62	101.36	219.885	86.4398	100.319	53.0247
NM_001000230	103.512	163.117	109.838	85.9694	93.8464	83.927	78.841	52.3512	97.7702	79.5801	58.0084	92.988	68.7255	72.756	79.1287	77.7823	91.6562
NM_001000231	296.301	469.398	275.452	675.748	292.792	269.365	192.096	345.813	374.005	363.552	322.478	322.328	354.317	285.807	303.435	465.13	288.409
NM_001000232	385.793	603.717	310.355	740.751	440.326	343.739	474.584	344.603	541.305	374.979	262.132	314.957	617.481	542.112	286.447	338.856	267.103
NM_001000233	287.921	314.294	153.537	325.91	126.48	132.398	153.747	64.9068	202.939	258.475	102.536	119.867	139.851	199.52	122.848	94.5167	83.9305
NM_001000234	83.2166	108.413	124.681	79.202	62.3567	65.9846	166.694	91.3296	51.2985	66.4692	95.1005	96.021	75.6441	67.2139	94.9434	69.149	106.408
NM_001000235	133.869	181.461	91.0253	198.715	141.541	118.794	134.144	80.6413	117.526	137.668	109.694	140.93	143.433	119.181	108.237	164.513	90.5495
NM_001000236	136.446	303.778	246.2	288.927	96.0688	108.078	177.684	151.837	127.186	252.9	87.923	141.181	96.5184	167.132	142.563	332.379	117.474
NM_001000237	159.397	93.6229	72.8186	60.3972	68.2801	73.6371	48.4832	62.46	55.531	53.5039	54.7488	55.4841	66.7838	84.6491	43.5217	57.8339	51.9904
NM_001000238	258.986	277.512	241.667	242.43	202.372	232.849	139.895	98.5278	179.017	236.51	166.029	157.429	166.185	318.726	191.985	118.733	316.756
NM_001000239	91.8478	107.607	106.523	235.124	81.4366	106.116	89.5911	78.8543	82.6862	135.968	112.305	84.8098	53.0653	80.3747	70.6253	129.807	82.6562
NM_001000240	608.092	478.433	192.235	330.52	245.867	95.5874	110.84	112.885	187.97	215.724	160.769	144.532	418.989	260.144	121.606	183.038	158.242
NM_001000241	250.27	313.58	203.861	400.518	130.827	106.57	112.24	86.6611	126.886	219.333	71.9269	91.0743	61.3113	194.533	74.8994	119.105	83.1067
NM_001000242	60.0205	83.7357	90.2123	112.344	62.1942	43.7249	44.2488	45.0907	66.3937	63.706	55.3482	47.1505	58.0197	53.094	55.334	52.8243	48.6891
NM_001000243	203.92	355.3	88.0994	91.2387	144.289	90.451	70.7289	162.328	155.53	107.14	70.6307	66.1848	126.206	132.631	77.6629	72.4196	98.5394
NM_001000244	309.627	444.766	116.115	165.7	166.514	104.808	72.4914	106.617	211.981	179.15	95.334	134.524	151.774	294.167	104.968	133.676	91.6693
NM_001000245	134.201	183.585	68.0395	59.7079	83.0401	75.1759	68.8883	55.3121	94.3097	120.955	62.1696	54.5286	86.6413	82.6741	71.083	64.7304	46.6944
NM_001000246	82.0334	129.6	89.7576	158.672	95.7634	79.1033	82.2833	69.2115	107.903	96.3661	72.9519	78.8991	84.7575	107.674	69.9611	110.71	150.864
NM_001000247	496.45	460.53	510.298	748.327	351.188	290.155	207.355	237.698	284.237	471.591	229.732	267.939	297.564	357.526	267.813	325.235	177.264
NM_001000248	564.264	614.781	323.019	235.607	368.794	246.911	140.244	158.568	908.753	219.357	133.479	386.187	196.919	398.849	188.601	264.251	251.357
NM_001000249	56.0735	85.5137	59.7489	43.3296	82.5583	72.1297	50.4193	38.2687	65.1633	65.3654	39.8722	43.5325	59.5241	98.4201	70.3795	54.0672	74.867
NM_001000250	95.1096	105.901	73.0555	101.733	89.2044	71.1759	83.6977	48.5763	150.235	74.7797	74.1002	71.5469	102.766	115.136	77.4973	90.0209	96.6859
NM_001000251	59.8364	58.4247	47.9986	44.3396	39.633	54.2381	92.0571	55.0638	49.0642	43.9425	54.2846	35.0165	56.9912	80.2514	47.0988	59.9595	63.1712
NM_001000252	270.782	325.325	242.503	173.089	224.086	126.369	103.165	163.158	172.836	183.671	130.009	170.153	137.365	240.304	184.787	132.766	261.773
NM_001000253	85.8363	94.444	73.3374	112.142	122.777	64.5402	49.3652	66.452	92.8735	68.5973	83.4348	46.9928	53.5181	94.0714	46.8822	65.8435	61.4734
NM_001000254	262.82	202.743	66.773	142.446	223.67	63.0623	48.4457	61.0448	165.037	90.9476	56.3704	61.1203	361.721	153.444	69.8976	80.4221	39.6312
NM_001000255	46.4587	58.4765	51.1995	55.3648	61.2944	45.6206	34.2334	38.4151	64.2994	48.8089	39.4915	35.8593	48.4151	60.1274	42.5875	46.2913	41.1674
NM_001000256	80.4302	69.8933	76.3351	66.6849	69.0592	50.7903	69.4069	149.497	58.274	53.624	156.771	67.3697	73.6904	67.928	81.4188	90.3395	63.8327
NM_001000257	66.7315	72.7871	110.904	101.073	92.8296	74.6825	56.7915	65.8123	75.1829	91.688	70.2268	60.2706	57.7573	103.841	78.6658	61.4194	60.1389
NM_001000258	313.451	204.555	216.204	303.464	112.277	168.471	87.1139	83.5112	163	169.911	54.0728	93.1285	159.542	169.72	108.582	241.106	87.3146
NM_001000259	107.667	87.7503	72.3023	70.2305	55.8755	58.9831	48.3537	49.278	70.5482	80.8789	54.8201	62.3794	125.101	76.8133	57.6873	60.7263	87.7485
NM_001000260	170.162	136.866	120.003	160.995	93.2117	96.143	79.0097	48.3259	121.154	119.367	64.527	83.2866	62.6396	221.583	75.7424	101.195	214.323
NM_001000261	153.091	181.738	84.9155	131.041	139.635	63.8946	78.9404	67.8785	122.311	112.524	80.8509	83.2324	97.1074	127.775	90.2188	154.157	85.0015
NM_001000262	74.1224	84.7763	85.8225	70.268	69.1604	65.2655	63.4574	59.1144	71.8568	63.6567	45.8584	64.1551	62.8886	67.0005	82.744	54.7079	66.6588
NM_001000263	235.458	374.405	250.174	221.011	245.313	133.03	166.571	104.792	278.65	264.488	137.398	189.223	222.271	292.845	137.921	172.247	111.748
NM_001000264	134.908	258.13	175.804	395.685	103.149	101.585	68.4091	80.9182	181.383	290.791	115.632	119.151	57.3307	96.0647	118.71	91.2841	76.0801
NM_001000266	79.1806	75.6465	68.2819	101.028	51.5497	49.6981	50.9259	39.524	55.1007	69.8013	49.4717	51.9877	99.7044	68.0468	50.5413	59.3264	59.8614
NM_001000267	251.288	250.721	246.059	387.221	251.969	134.946	171.635	133.241	262.498	221.669	118.662	164.067	158.149	219.956	99.5104	325.783	104.277
NM_001000268	481.205	644.337	532.588	1105.51	265.23	291.427	195.504	212.937	254.128	551.793	200.352	211.613	78.5038	551.782	239.976	373.704	190.168
NM_001000269	193.037	317.25	149.558	377.528	173.279	93.8606	70.6879	69.7161	158.271	130.592	80.8162	86.849	61.4484	234.664	85.3407	132.605	66.7397
NM_001000270	128.688	168.001	159.143	102.128	112.529	62.5792	125.96	105.799	87.2132	86.0954	50.5635	72.8012	185.44	97.5745	49.1546	73.4045	76.8272
NM_001000271	654.186	603.145	356.027	819.249	321.347	189.202	172.48	137.346	371.415	426.58	105.987	202.685	146.877	422.829	179.27	249.838	207.182
NM_001000272	207.908	133.978	128.741	148.664	123.89	117.174	185.387	86.0348	161.879	104.682	97.8058	94.224	174.239	164.74	80.5288	100.097	266.487
NM_001000273	160.873	74.7494	63.2643	110.791	108.623	61.2898	61.4828	95.2871	84.9349	84.7949	57.3127	61.2527	116.792	132.434	68.5869	51.2288	65.4012
NM_001000274	109.916	79.5648	88.8848	127.144	59.2028	43.0892	56.4368	64.8119	86.5032	70.0994	50.6271	45.6204	101.436	98.8592	40.4077	66.7162	37.7032
NM_001000275	101.115	115.212	88.1608	88.3698	57.1429	56.2636	44.55	75.535	93.6228	69.229	49.4678	56.7211	55.4371	94.5021	43.8207	81.233	50.782
NM_001000276	466.269	451.957	162.093	172.965	196.333	99.4347	91.5217	74.1901	245.618	139.355	187.166	94.8699	128.543	236.664	124.765	168.564	101.647
NM_001000277	120.957	136.011	116.235	74.762	128.399	67.5799	43.8949	48.5706	178.517	76.1713	268.149	136.444	98.1024	142.093	65.609	122.511	77.5769
NM_001000279	49.5116	72.0852	81.5206	49.0172	91.1578	59.7562	42.8169	84.1005	96.158	42.0008	47.6676	60.7977	75.7862	65.5415	45.0007	46.8894	56.3761
NM_001000281	129.004	82.6712	67.9393	79.4354	73.8517	65.3447	71.2141	80.4448	143.426	62.4391	161.739	43.0195	139.56	126.179	62.4977	73.0481	63.1478
NM_001000282	77.2257	88.4066	55.7758	105.651	80.738	46.1038	43.7646	52.4275	128.862	75.1518	43.7935	59.906	111.518	85.7915	48.2018	59.7797	49.8406
NM_001000283	141.546	155.726	158.519	148.36	90.7609	84.8085	77.9323	110.56	90.76	75.949	59.7773	76.2514	112.008	169.44	74.1403	109.422	111.076
NM_001000284	63.78	54.462	45.6811	42.7712	62.2042	45.3087	42.0235	44.4142	61.5816	40.1762	36.1624	44.845	49.2349	58.8796	48.1107	64.8918	54.8303
NM_001000285	119.14	75.1071	64.4166	79.9972	108.18	57.2949	49.0122	60.5324	111.287	56.849	55.9854	49.9129	92.9236	167.674	61.9718	78.9271	67.8245
NM_001000286	139.073	112.007	100.049	139.624	122.318	71.1924	115.671	65.0663	113.763	89.8486	71.374	70.9068	153.353	130.132	58.2999	66.1176	90.3402
NM_001000287	76.732	94.4458	68.3362	63.8743	81.0822	60.2244	55.897	94.8709	53.8348	56.5552	45.5841	53.2315	57.142	66.4696	69.8976	44.8242	85.3927
NM_001000288	191.432	162.164	122.126	119.977	166.355	74.4174	57.5417	54.9488	150.39	87.8384	79.9996	65.7272	161.327	162.249	79.9068	102.567	139.79
NM_001000289	127.176	87.5226	127.607	206.146	144.214	128.4	210.921	126.825	92.9329	163.418	125.598	109.711	96.4178	104.795	81.3806	149.68	158.871
NM_001000290	93.2893	115.083	97.3599	101.575	93.211	69.9524	65.7544	63.1086	72.8612	65.2264	52.2304	56.6147	70.5399	94.4065	54.2662	72.4312	56.2627
NM_001000291	161.637	227.607	156.09	320.807	104.849	63.8396	62.4691	182.021	88.5578	80.2411	60.3758	70.5648	58.8259	131.099	62.1271	179.963	62.7542
NM_001000292	118.98	89.9667	57.8823	144.622	88.8378	104.86	105.91	62.1343	91.258	95.9697	71.5642	65.4763	86.0599	108.019	68.0371	71.3324	99.5431
NM_001000293	75.3152	109.591	52.4464	65.7888	65.7865	40.0388	56.2797	36.7577	57.4226	67.6486	47.8101	67.8124	105.523	66.1063	54.1121	65.6831	55.2458
NM_001000294	71.9004	68.7262	72.7384	83.8025	89.0564	52.9046	62.1906	48.9183	66.3069	60.9361	50.1088	53.6337	81.3093	52.2373	62.0415	48.3374	58.8101
NM_001000295	662.039	567.735	293.156	532.699	436.173	213.661	357.572	172.141	512.122	278.72	287.897	287.057	408.601	524	205.312	231.62	184.639
NM_001000296	179.043	272.091	83.9346	124.744	191.079	66.3115	81.6361	64.4219	166.341	83.1852	91.0253	71.3476	155.758	193.544	73.8209	81.726	54.5086
NM_001000297	167.102	90.0755	79.9507	66.6816	113.428	99.1336	65.5209	67.5176	58.7158	73.108	58.3894	104.602	85.8537	110.532	110.293	53.464	172.19
NM_001000298	253.17	289.763	244.09	366.803	228.418	180.182	329.403	176.149	230.396	190.238	108.149	216.22	339.884	320.9	125.33	158.707	126.439
NM_001000299	79.3594	60.6917	65.1563	49.8369	44.9646	52.3263	47.3041	48.304	57.5379	53.8577	58.569	58.9015	54.2099	58.4064	36.9415	46.5173	57.9723
NM_001000300	58.6604	52.1636	94.4187	71.3885	54.5323	36.1668	56.1525	44.7297	59.7559	78.3953	48.9114	37.8331	81.8585	74.2344	50.821	53.8458	54.3936
NM_001000301	101.049	65.1229	56.4072	51.0295	51.1557	42.7222	41.2429	60.0131	58.3281	48.0544	53.6504	41.8752	79.2252	57.3905	50.9788	56.373	55.5052
NM_001000302	179.059	124.585	105.097	110.993	166.476	64.0887	74.5487	117.84	94.0185	86.789	70.3928	48.1576	121.558	132.153	66.9699	141.76	102.147
NM_001000303	73.6013	106.401	177.171	137.583	77.7487	78.421	70.3262	88.0579	102.714	59.8532	49.5031	90.3508	72.3074	126.113	66.9349	105.233	106.825
NM_001000304	107.637	144.384	125.071	213.749	151.26	88.5941	100.604	82.1751	94.4681	83.7532	82.3433	116.231	74.4582	101.713	85.5484	78.4945	143.212
NM_001000305	102.779	91.5086	94.7608	111.855	112.189	83.5146	65.3184	41.358	102.084	97.5469	63.3872	56.706	101.688	105.386	55.4603	61.9049	71.8743
NM_001000306	104.663	147.219	104.362	100.645	110.637	75.5228	74.4357	159.624	163.401	68.6956	84.2353	57.2499	67.8555	128.897	57.2086	107.578	47.1642
NM_001000307	240.295	251.079	166.637	266.813	174.455	84.1491	96.3973	115.101	174.674	116.361	154.503	130.982	126.62	185.792	64.6134	144.828	147.93
NM_001000308	69.5929	70.1839	54.0419	72.8956	52.1679	59.643	50.0052	51.9326	90.0726	58.8005	35.5483	62.9572	77.0985	171.026	54.1877	45.6776	69.2797
NM_001000309	80.5249	79.042	54.3213	60.9363	81.8634	66.5432	108.917	75.2821	84.8829	49.9059	60.9528	56.2184	79.7202	87.5889	47.477	62.7724	38.2431
NM_001000310	80.4636	73.8045	57.3099	67.7811	72.7279	53.2691	64.0082	44.8891	57.1667	46.6906	43.1037	59.4477	58.6879	82.6001	56.9384	56.0558	59.5542
NM_001000311	127.6	66.8608	87.4926	67.0585	57.0639	45.9542	62.1131	73.7791	51.4751	49.56	62.8633	46.806	49.1056	53.0777	42.2357	57.8631	37.2896
NM_001000312	75.0459	82.3646	63.9112	79.3739	68.6757	56.1359	67.9275	59.3733	56.07	99.5948	72.7047	88.4557	59.421	69.7305	44.5116	76.0091	47.6899
NM_001000313	67.6341	113.96	65.3234	58.1852	75.6299	53.6159	61.4888	62.0671	89.8125	65.5894	58.8476	88.3565	59.6855	87.1308	66.3126	77.447	86.71
NM_001000314	85.7444	65.9362	67.1236	72.3752	62.6232	67.8554	73.5823	67.5219	60.2138	72.6072	61.6909	53.0335	45.3538	72.6577	66.5494	54.9472	85.8745
NM_001000315	72.8147	54.6778	78.539	108.934	80.078	59.7312	44.5836	51.3704	69.0576	63.937	73.298	62.2062	58.1402	68.5141	57.5546	49.6193	49.6111
NM_001000316	172.27	122.961	158.402	187.094	110.203	105.836	122.978	62.1251	108.421	124.721	96.4963	60.4781	91.685	119.171	69.3483	91.6083	93.7982
NM_001000317	63.832	61.5688	51.0936	83.7813	73.6087	50.0625	50.0404	51.636	63.9536	49.0816	58.8477	50.9088	60.1654	120.713	39.8928	52.9191	50.8178
NM_001000318	98.4393	76.3048	55.6374	198.828	220.033	73.9543	75.3193	46.4369	51.1511	66.0674	129.816	58.1248	94.1945	72.6055	71.8403	73.7331	61.6668
NM_001000319	376.608	135.904	108.319	140.541	225.931	74.6504	50.4561	94.9889	131.164	100.237	57.0146	86.0134	126.906	166.873	82.428	86.2334	63.4201
NM_001000320	62.6589	63.6226	87.5788	99.5781	117.883	89.9228	84.376	72.5804	75.2666	81.4391	83.9024	93.8969	42.2443	89.1863	116.494	108.339	116.433
NM_001000321	129.407	151.107	92.1982	182.834	78.7633	48.5955	52.5658	46.7318	78.1461	85.7295	48.9095	49.0201	49.111	150.107	64.7341	49.0385	52.6113
NM_001000322	134.785	177.706	93.8059	370.856	251.638	70.3125	73.3515	86.5135	102.057	92.5515	97.6201	61.7681	65.7179	212.831	83.7592	178.002	71.3384
NM_001000323	129.721	117.849	140.136	146.317	89.5833	69.6453	66.4168	50.4014	108.809	78.2594	65.1831	69.2084	93.968	121.692	69.3173	69.3975	71.3853
NM_001000324	82.3562	78.4856	92.612	117.219	85.796	69.6061	40.1746	41.3067	61.6635	54.8689	54.3348	58.3252	69.022	78.844	42.8169	70.0785	49.7216
NM_001000325	61.1398	64.3077	59.496	49.9474	104.639	109.412	46.1543	52.8505	49.2764	55.9504	49.0504	40.4847	58.5035	50.62	71.8366	46.1945	44.7619
NM_001000326	157.253	131.318	94.101	80.8693	151.66	72.5406	70.8511	75.9618	127.019	90.5263	63.5332	95.0131	95.8776	197.812	54.63	68.6938	78.9243
NM_001000327	54.6741	87.6567	54.3979	56.497	57.271	40.2059	48.9895	45.7061	63.0345	44.9243	40.87	42.9741	50.9277	54.1724	53.4308	56.1808	49.3945
NM_001000328	120.516	96.4442	105.671	77.4923	69.2312	82.2301	53.509	57.1544	95.4726	79.0662	53.191	61.6537	65.1683	186.66	71.0994	52.4945	71.7571
NM_001000329	96.0708	90.6819	87.815	131.506	137.584	82.7675	50.2242	171.172	127.885	87.8321	175.952	72.8808	168.585	165.286	86.541	427.129	150.639
NM_001000330	87.9492	102.744	52.6346	99.5826	98.9474	41.1846	55.5858	49.0785	149.204	56.1569	42.486	57.065	85.2966	73.4756	52.673	54.8502	48.6246
NM_001000331	66.1894	74.5115	55.9698	55.1321	75.4761	53.1352	42.8818	69.7267	65.7837	34.2665	65.6363	46.1388	67.6445	69.774	42.5499	52.6391	43.1614
NM_001000332	164.348	241.491	216.987	284.821	121.394	120.11	97.4094	91.5145	165.02	155.572	90.3746	183.125	81.3192	167.674	76.9478	117.966	102.573
NM_001000333	124.326	153.465	143.958	251.411	63.0927	91.2804	60.0984	66.0924	80.5532	99.348	62.8723	67.7972	70.2407	147.732	54.827	58.3167	58.7083
NM_001000334	170.744	115.26	99.7694	72.0553	107.043	53.0621	75.2562	49.1442	79.6229	64.3692	53.9764	61.6339	103.212	100.461	115.741	77.9935	48.2721
NM_001000335	93.2466	64.6236	85.4824	92.0329	96.291	48.9851	55.2686	60.4288	71.0506	69.2026	99.3247	90.469	57.6899	79.3109	63.7527	53.1642	51.3161
NM_001000336	313.814	403.754	228.465	398.554	272.011	148.514	207.812	135.026	303.892	186.353	130.484	117.626	172.537	260.72	107.879	128.252	100.496
NM_001000337	95.7865	82.8345	109.044	94.9685	74.9356	68.1306	99.3416	68.5246	96.327	108.591	57.7495	61.7587	70.697	106.168	63.8992	74.1142	49.8976
NM_001000338	78.0848	85.9656	123.755	73.6204	83.1835	59.0544	72.4016	59.1551	64.0579	56.7222	50.2871	53.437	105.409	101.169	57.2402	58.0868	47.4092
NM_001000339	76.8338	56.2454	46.3013	51.3713	54.1408	45.8539	48.4099	39.7303	48.9595	41.5436	44.4813	68.5324	65.0722	57.6341	46.2836	47.89	49.5504
NM_001000340	72.052	67.4138	63.0363	45.2324	102.401	62.7881	47.9004	42.5787	45.0803	49.766	57.2226	39.7186	49.0332	106.825	42.2498	54.6195	53.9758
NM_001000341	66.1222	81.8499	47.0577	72.3076	55.1964	50.759	50.9506	43.6894	48.5067	53.1753	64.438	53.5652	84.2682	75.282	41.1965	61.549	45.2324
NM_001000342	186.355	80.4981	62.3588	52.6894	87.9374	65.4388	49.44	67.7931	67.3057	72.8379	45.4001	72.4966	80.2783	177.396	61.8942	56.9156	71.7791
NM_001000343	108.285	106.581	120.442	166.047	121.626	66.4743	52.9083	67.4907	97.3932	94.0237	146.496	60.143	66.6115	98.1852	60.1277	71.0531	69.8655
NM_001000344	92.645	92.0439	72.2128	64.3821	89.6921	41.035	42.0655	72.7237	72.7585	74.646	60.0708	52.4711	63.571	57.5065	53.0863	57.8898	70.4836
NM_001000345	577.335	652.858	445.527	746.414	299.33	259.116	375.647	263.548	552.986	365.918	294.359	304.287	414.796	666.353	230.787	366.497	250.858
NM_001000346	87.093	80.821	47.5572	65.257	70.7487	52.5394	41.3141	49.7172	69.3345	43.2105	47.9284	46.1862	64.3104	88.3372	66.5397	50.2327	62.8853
NM_001000347	98.3166	77.7116	98.8441	98.4957	67.3555	103.51	61.5878	64.1489	69.1212	72.6976	55.7989	51.7312	68.1192	77.9382	50.9995	76.3088	59.1743
NM_001000348	76.2843	105.967	66.3058	58.5723	75.3606	58.5062	50.772	47.956	65.8217	66.9137	58.2259	62.3799	63.7103	77.7218	56.1853	73.5393	63.6904
NM_001000349	269.542	126.407	104.318	131.917	102.309	55.354	69.9754	85.4709	118.786	67.4414	57.3208	82.8352	132.462	119.457	69.785	126.243	63.5943
NM_001000350	78.1235	62.7045	64.9093	55.585	48.5407	53.2242	42.4071	54.9976	53.1766	54.8979	40.6019	62.7592	91.0405	64.5773	53.7135	47.1889	81.5489
NM_001000351	142.039	265.87	125.202	137.324	145.335	73.3056	84.3358	71.1439	181.556	135.076	57.8748	107.024	138.369	111.83	150.742	62.989	86.4258
NM_001000352	231.501	253.147	187.778	229.517	150.426	91.6794	100.045	81.4306	126.048	166.848	64.6508	71.7968	86.1664	128.145	159.316	184.446	128.456
NM_001000353	133.806	142.48	86.0567	130.563	102.717	68.6557	44.9115	59.2371	77.2467	80.9856	54.6301	62.7923	79.9996	102.849	57.6683	78.2805	103.194
NM_001000354	90.9605	106.441	128.929	63.4868	77.2834	75.7811	51.5058	75.4373	99.7608	48.9667	79.8301	65.2535	63.1713	138.417	54.2721	76.0982	74.0108
NM_001000355	117.864	243.709	108.911	173.38	117.957	107.5	111.484	71.867	146.377	100.791	87.3164	85.1402	213.335	175.434	100.907	70.6505	50.8659
NM_001000356	113.115	126.331	69.8855	69.4715	105.106	59.8955	117.253	53.0257	92.9048	114.97	63.729	60.5222	100.087	130.378	71.4387	115.037	32.3617
NM_001000357	83.8159	62.7045	97.5312	226.682	56.1959	80.1838	61.9752	65.8317	57.2363	54.8462	46.967	87.3079	52.0363	66.8981	44.793	44.2867	52.4666
NM_001000359	191.408	199.014	138.756	146.595	98.8377	87.2062	85.5695	59.8711	108.067	135.093	104.8	109.323	89.6662	205.201	172.343	79.8896	86.3263
NM_001000360	253.925	205.943	164.123	173.464	144.077	64.5278	70.0258	50.2881	87.0284	82.3181	62.8731	79.9477	89.6969	148.257	83.0673	98.9009	53.0257
NM_001000361	120.831	124.242	75.8685	74.632	88.1817	53.3343	60.1879	76.8559	64.046	53.7228	53.2712	99.4082	92.853	90.0418	64.7873	69.4403	112.786
NM_001000362	75.4291	56.1593	80.0442	49.2233	52.9148	83.722	71.2884	86.7541	61.7943	59.1111	58.1881	59.9782	79.0066	60.6849	53.218	51.9726	58.4939
NM_001000363	144.864	194.08	118.064	260.769	92.5784	87.7197	98.3249	51.1446	194.023	103.682	73.3462	88.5879	92.802	151.499	89.3295	149.371	77.4271
NM_001000364	118.55	85.6746	95.3331	75.3207	66.6818	55.4315	51.923	74.4051	89.9518	75.7709	61.7437	69.6114	69.7648	80.6817	52.3829	113.256	70.1691
NM_001000365	189.585	162.416	120.553	112.515	90.317	60.2488	64.9917	63.8311	99.4252	95.8916	61.4407	84.1908	94.0129	115.832	73.7254	94.298	122.885
NM_001000366	91.3934	92.1606	52.7269	61.6897	103.673	63.2673	59.2401	45.3966	90.6213	61.4544	44.7328	58.0199	67.7904	99.0503	50.9814	51.6511	40.6066
NM_001000367	49.1216	53.3991	40.1319	35.1077	46.6891	46.5764	42.9424	36.732	44.9652	42.3656	57.0653	38.9502	68.1386	64.1625	46.75	45.276	47.6267
NM_001000368	104.375	101.326	89.8458	60.618	108.537	55.3845	36.603	51.7916	111.66	51.0305	46.6854	58.5921	74.3989	104.543	64.2564	51.8281	42.6473
NM_001000369	74.0268	85.7006	44.2355	42.9321	67.2701	51.3384	77.109	44.3393	61.6452	47.634	59.418	41.1107	84.9441	90.7351	45.2959	61.3462	46.9641
NM_001000371	82.411	54.1982	46.8629	66.8941	82.0097	55.2492	55.88	45.7335	53.0383	56.5437	67.0556	52.375	66.0801	81.7062	53.414	48.1168	49.2979
NM_001000372	82.899	113.806	76.2316	108.126	78.5829	45.2902	56.47	41.2075	96.7285	60.4957	51.0537	69.9744	62.3694	86.1495	75.34	52.7952	47.1467
NM_001000373	207.811	65.5565	61.0651	54.9793	78.6317	62.8586	45.2303	75.9366	68.8249	51.1387	69.7081	56.9049	74.0793	68.8931	56.02	56.2049	66.7765
NM_001000374	74.514	84.9543	80.1013	74.0732	72.5842	53.9499	55.4146	86.3505	76.4432	63.0698	94.5823	52.1192	48.7286	65.2508	67.0747	80.9381	55.3263
NM_001000375	50.6259	65.1362	46.9847	58.6728	52.628	35.0713	84.3506	42.5443	58.0002	40.3886	117.249	34.7638	57.4048	67.9762	40.1935	96.7436	36.3744
NM_001000376	80.8087	93.6984	77.38	72.3092	73.8255	63.5808	134.305	70.0406	61.807	53.536	56.7662	57.0144	65.8165	128.484	59.2043	149.218	53.6189
NM_001000377	326.712	331.352	165.291	228.836	123.738	101.702	159.396	93.9464	149.296	145.975	123.061	123.135	106.4	217.88	104.145	156.619	92.7902
NM_001000378	78.7603	104.126	78.9944	77.9805	125.977	71.2901	50.1645	59.9368	79.0903	83.1666	58.0838	85.7253	91.72	251.195	56.6574	55.5693	78.4069
NM_001000379	177.681	127.028	81.8698	100.236	161.435	63.1517	67.9679	63.4747	112.873	75.9545	44.2067	51.682	67.3692	158.82	57.5218	87.1015	71.6646
NM_001000380	59.6938	57.7571	83.0146	69.9919	70.7589	44.9248	84.0979	54.8935	75.2666	54.915	62.3048	70.1512	86.3485	66.7561	49.016	46.6521	52.38
NM_001000381	85.5558	95.6731	76.8971	111.396	162.163	41.3588	71.0275	61.3452	81.4409	122.005	47.2928	74.5755	87.7031	100.118	54.2336	71.2382	50.6524
NM_001000382	359.027	380.07	155.363	321.023	225.314	125.062	135.961	126.032	219.093	139.783	128.43	212.609	227.752	279.739	150.474	118.259	84.1741
NM_001000383	73.9379	72.8989	108.044	85.7328	52.1678	52.9942	60.821	38.8303	72.3581	52.693	51.6764	50.2308	80.3025	74.8727	58.5209	52.2017	54.0939
NM_001000384	67.3873	75.2049	52.4799	72.8788	122.421	48.2867	48.6127	62.7237	81.2866	47.4787	63.5885	42.1555	91.8225	88.7593	47.8713	49.2223	63.7487
NM_001000385	136.884	52.3629	54.8197	45.736	43.6722	39.7227	40.7857	41.4256	60.1683	46.2198	40.1399	32.8608	65.7908	67.9335	37.6409	39.8385	55.5754
NM_001000386	74.7845	103.631	66.105	64.0088	56.238	50.5214	58.1317	53.6241	66.4259	76.7228	58.488	59.1915	58.3093	56.5505	57.9392	62.0778	66.0351
NM_001000387	117.617	127.605	115.78	95.032	110.213	67.7544	51.4696	44.2909	100.156	113.993	48.8831	69.3402	56.2676	162.732	89.6818	74.7059	79.7796
NM_001000388	179.347	139.269	89.9915	118.593	115.081	75.8869	58.3348	79.9183	79.4683	109.618	59.5987	124.241	57.1096	103.277	67.3558	73.7481	51.2966
NM_001000389	203.866	193.744	85.6601	97.1613	149.81	56.315	107.744	88.0468	196.268	70.6876	73.9466	114.879	153.527	114.551	57.7123	75.6225	76.7298
NM_001000390	144.487	201.605	132.288	127.333	155.148	50.0029	62.7496	103.553	139.234	76.0845	55.1553	81.2254	77.949	184.829	71.707	105.458	92.0726
NM_001000391	251.444	315.77	173.442	254.727	143.974	99.0309	62.2408	69.9524	117.729	185.028	86.9647	104.274	131.638	169.052	81.1009	108.537	117.372
NM_001000392	78.2629	96.2556	103.907	113.343	121.844	71.2171	93.0509	70.3262	88.9318	112.272	48.6279	85.7422	58.3719	79.0852	76.7579	62.7214	80.1312
NM_001000393	145.876	208.733	167.76	347.582	121.896	91.9844	96.9081	83.4036	107.983	198.923	119.883	96.1867	82.0504	120.317	118.64	94.8313	80.1509
NM_001000394	81.3498	95.5243	74.1801	111.413	80.0221	68.1421	59.0027	54.3898	105.995	110.06	68.3977	81.2675	140.824	90.1378	47.0377	50.9203	73.4773
NM_001000395	67.3971	84.5886	76.2447	55.6816	71.1601	47.7578	49.7065	55.0157	69.874	91.4821	46.4058	71.9455	55.418	72.1961	95.8251	63.9848	55.8203
NM_001000397	81.4516	118.221	76.6638	112.145	104.349	84.9989	128.679	72.326	95.0758	104.184	76.0315	69.2987	99.8092	105.417	105.465	66.912	69.3999
NM_001000398	81.7686	99.768	57.7005	54.582	57.113	74.8673	52.1509	60.9008	82.9502	76.8736	54.9419	36.0263	80.9937	69.3267	57.8173	82.7018	57.9683
NM_001000399	63.2166	62.5068	62.5798	62.8078	64.0514	69.4401	41.0028	43.9934	52.5908	48.1168	55.2297	39.7241	68.1096	65.4322	47.9004	41.1377	48.2641
NM_001000400	105.669	112.403	81.1383	55.8726	81.7782	42.8492	41.7867	48.2943	64.1728	49.269	50.0226	51.682	83.0311	130.839	53.3845	52.0835	42.8135
NM_001000401	155.111	131.985	115.876	132.518	172.334	71.4435	53.4515	44.9753	116.809	94.0383	72.8447	67.1989	75.4839	130.03	61.0891	53.8368	94.2904
NM_001000402	139.932	111.76	102.076	86.2475	102.938	73.6116	63.3733	48.5413	73.4762	92.1279	59.8375	54.4716	80.1276	122.262	51.1683	85.2869	69.6977
NM_001000403	81.9065	143.968	54.5453	94.2977	265.986	65.1981	48.9484	47.6433	68.4412	50.7265	49.0171	54.7676	132.688	175.965	71.4777	45.3131	55.8814
NM_001000404	131.996	115.529	89.1925	183.342	59.5886	47.4932	69.445	59.3203	71.0832	125.112	56.4741	51.0774	57.6249	78.8324	58.446	70.1116	39.0386
NM_001000405	225.929	157.044	136.974	260.233	117.214	131.401	78.4573	138.779	81.7564	160.489	121.465	112.129	210.126	206.287	117.26	133.077	109.475
NM_001000406	206.761	206.22	112.605	139.829	102.601	105.088	73.1453	78.8699	143.767	141.035	96.2668	117.344	131.82	161.456	174.258	136.601	129.928
NM_001000407	87.3011	130.463	73.2845	122.547	65.543	98.2612	84.7525	73.3874	128.317	87.51	56.7621	70.3559	113.487	110.595	139.811	95.9032	92.3412
NM_001000408	99.9313	88.2586	70.4965	94.562	65.0552	59.8029	49.44	47.5864	76.7979	72.8375	81.3749	52.7187	277.998	63.9553	65.0836	50.7736	83.6097
NM_001000409	367.598	402.39	175.15	167.97	714.804	297.668	203.982	158.806	235.545	224.322	167.69	247.71	413.825	324.283	348.58	222.399	283.753
NM_001000410	2015.51	3527.82	1299.22	2460.86	1005.27	624.353	508.255	367.672	971.486	1266.77	692.834	629.914	533.752	1368.62	694.41	969.972	719.162
NM_001000411	416.43	455.969	205.061	285.274	173.706	97.4263	187.684	71.6701	243.652	163.418	150.495	114.128	149.646	234.88	188.268	170.397	99.5414
NM_001000412	421.412	800.367	211.479	369.744	239.876	96.1712	85.6395	71.2526	221.386	210.096	75.9509	134.286	88.1614	309.744	83.1457	244.867	122.749
NM_001000413	1020.69	1702.04	735.91	1438.83	560.835	417.691	295.722	327.255	430	797.981	383.946	419.641	270.425	776.727	596.461	684.283	398.429
NM_001000414	533.894	1033.36	338.39	611.554	662.28	266.96	490.402	210.352	697.324	362.987	337.741	435.501	632.312	931.741	263.402	279.25	216.903
NM_001000415	140.035	139.083	153.631	123.327	91.3296	114.665	101.523	65.202	101.733	91.2519	70.0269	107.978	110.545	127.26	79.8915	103.432	61.8847
NM_001000416	552.215	793.872	438.938	1096.61	569.38	300.916	265.153	176.174	477.986	205.738	340.655	324.71	716.317	755.715	344.382	387.659	361.269
NM_001000418	114.921	121.847	65.2948	119.834	69.2341	48.1661	57.1608	69.8976	79.3853	103.51	57.9692	80.8685	59.7228	75.9112	76.1359	88.2954	66.7316
NM_001000419	59.7879	76.7597	57.0927	75.0334	56.8559	47.8807	44.8242	46.3895	50.9476	54.6248	43.403	47.9272	58.644	51.6494	44.9603	43.6124	36.7439
NM_001000420	236.203	412.187	195.373	329.477	103.592	116.456	96.3473	87.6328	151.904	147.819	115.216	92.0568	179.129	238.318	89.6718	117.662	84.2707
NM_001000421	104.823	62.9033	76.6375	72.8582	108.246	75.4942	51.4889	83.826	126.293	49.2291	118.235	93.5028	96.7223	128.711	143.768	105.103	107.41
NM_001000423	69.2625	72.5516	51.9811	47.8952	62.3218	58.2797	66.3959	55.2003	61.6696	91.3103	68.446	49.44	65.7613	75.3505	40.5489	41.8236	47.5223
NM_001000424	141.323	338.017	155.098	171.967	120.338	82.004	72.6863	93.2952	174.804	184.874	100.865	90.5813	83.9537	99.1067	89.086	130.623	118.965
NM_001000425	126.983	136.263	100.985	67.1795	138.791	105.805	76.6454	145.264	104.349	98.3931	98.4417	101.195	85.5522	140.908	89.1573	77.6959	71.2779
NM_001000426	60.0655	80.9318	47.5013	45.3969	79.7568	44.7955	40.0401	45.4747	133.906	51.0475	63.1302	39.1044	52.2623	90.3516	39.4053	45.1095	48.114
NM_001000427	62.0317	53.1181	63.139	47.5562	76.4313	65.3311	54.2674	52.3112	68.2001	51.6031	48.6356	49.8462	51.1181	67.4437	57.9209	53.6122	57.9142
NM_001000428	126.553	94.2515	84.0511	52.6867	57.7457	53.359	159.97	44.3038	81.3599	45.2594	48.7664	54.1377	88.1042	96.0441	61.7946	76.59	50.4502
NM_001000429	227.226	109.515	98.4529	164.904	108.822	87.9581	67.576	49.2539	101.391	105.517	64.3777	55.4841	110.292	193.596	83.8605	74.0949	85.5842
NM_001000431	64.8976	62.3421	79.7585	59.8267	61.7829	52.2174	48.0557	48.1325	77.8366	52.7876	47.4883	59.6782	86.0853	56.6395	59.6807	53.9858	50.0917
NM_001000432	95.396	117.574	69.1108	64.3985	113.982	58.6076	61.5185	63.0748	81.0167	61.8253	49.6699	62.2651	95.6521	67.2415	61.6727	62.9423	97.2326
NM_001000433	184.855	169.175	186.03	193.211	64.6604	130.452	119.218	78.2653	114.475	170.045	176.13	141.108	78.3479	123.908	114.531	145.819	112.9
NM_001000434	70.8372	95.0889	43.0798	63.4381	89.8045	56.3465	48.9978	45.6703	68.5399	48.641	58.6601	38.8336	51.8973	117.237	36.696	53.2712	41.1205
NM_001000435	161.334	231.117	201.661	265.232	251.836	114.2	101.144	105.48	207.308	211.598	106.71	109.239	127.09	227.979	113.741	128.442	88.2598
NM_001000436	234.866	260.531	164.604	164.658	125.244	75.2635	65.6592	73.9696	83.0266	99.1532	89.1851	78.4889	67.5711	146.26	75.3773	131.261	108.268
NM_001000437	131.811	153.034	97.8267	128.389	126.99	95.6821	77.7338	83.2585	85.6033	115.761	97.9395	66.4906	98.6924	125.442	88.0754	71.8732	64.7047
NM_001000438	319.478	475.503	243.611	565.096	265.158	287.953	113.426	117.864	272.991	217.183	135.078	218.444	278.377	581.445	264.435	139.141	115.095
NM_001000439	56.539	57.8002	55.104	49.5681	53.2733	74.7205	42.3251	42.0962	46.8801	50.4316	54.088	47.5539	86.2412	53.5668	49.425	41.3043	57.9728
NM_001000440	105.42	87.4102	102.169	171.764	80.5976	59.7782	53.4672	64.4048	79.1153	75.4665	102.921	61.6065	51.1923	77.7219	49.1833	66.8052	47.9961
NM_001000441	79.3728	74.8917	58.0015	59.3057	80.6584	67.6723	57.3013	65.3926	68.7324	72.1479	49.7869	58.9405	64.6091	80.9787	69.0027	71.6129	64.4471
NM_001000442	149.883	244.968	99.7288	161.272	86.1452	72.0476	70.3833	78.7844	159.709	127.763	65.045	81.2822	81.8435	159.572	66.1446	92.9455	86.5087
NM_001000443	144.229	120.204	104.756	173.612	99.1199	62.8145	56.7213	84.9723	123.24	72.2435	67.6893	69.4302	108.216	122.044	54.3966	96.1531	70.4228
NM_001000444	200.893	221.128	138.383	317.678	91.9999	84.7916	106.554	73.8461	92.2957	97.9212	110.4	72.2297	130.431	144.944	80.9875	145.55	99.1419
NM_001000445	220.59	145.157	109.829	107.174	124.625	76.2903	42.1702	64.529	101.01	66.1804	77.1871	110.821	106.322	97.4381	112.627	83.0033	104.105
NM_001000446	309.935	461.526	143.521	260.297	364.242	110.853	162.639	92.3277	357.802	128.9	83.8963	116.438	313.836	364.287	48.3165	129.153	95.1997
NM_001000447	79.578	103.261	108.271	116.486	85.6115	91.2432	46.8109	64.1162	137.049	82.3754	64.3973	66.7605	69.6007	105.625	56.3933	58.1174	58.8387
NM_001000448	83.1203	71.2837	48.1554	60.9734	78.4939	48.9183	51.1275	32.8034	69.77	53.4788	35.1066	45.6659	53.1531	79.0852	56.0884	54.3719	53.2412
NM_001000449	121.461	200.905	84.839	96.9836	91.3948	70.1319	76.5663	61.1582	97.6089	67.2967	39.4138	68.6372	108.28	131.381	81.201	66.6459	72.5857
NM_001000450	80.7193	79.0161	50.5769	55.3654	60.4957	65.3552	55.7734	43.3621	57.4852	61.5473	49.0407	39.6974	57.2861	162.397	48.3576	49.5536	87.952
NM_001000451	78.3526	107.312	77.6685	130.093	52.4308	43.3	49.2758	45.8433	70.4542	64.6093	41.3609	60.522	71.8347	74.9618	58.6872	69.7267	78.0141
NM_001000452	416.267	279.534	152.739	188.417	130.621	82.6082	98.5444	69.4347	105.987	144.988	62.8982	76.022	76.8488	163.151	90.795	88.78	71.7525
NM_001000453	55.0282	61.5827	48.0274	53.0046	53.1242	37.2062	65.8745	55.3554	67.2716	51.8442	50.6996	45.7133	63.0645	48.9886	43.6224	65.3203	56.0807
NM_001000454	151.453	246.175	126.036	91.6726	141.475	243.418	47.2338	64.5355	151.438	88.7705	69.8396	128.372	108.804	163.737	64.7714	61.7666	39.5533
NM_001000455	64.5174	82.1856	58.0952	65.41	70.6003	53.921	73.3989	44.2347	54.7312	61.7462	57.8095	59.5592	59.5025	82.1009	71.4791	78.9407	57.7027
NM_001000456	75.7806	101.007	58.3973	70.0226	49.0014	59.3346	52.5811	45.4917	61.0278	72.869	58.2094	46.4212	60.8931	67.6606	41.7859	46.3808	39.5175
NM_001000457	51.7906	45.8929	51.6815	44.5603	43.1157	35.6787	44.6662	68.3941	60.0223	42.0237	38.8632	38.453	64.0849	52.3975	41.2628	38.3361	41.7948
NM_001000458	96.2794	72.5312	77.7759	74.8611	110.434	62.0457	93.5519	61.7921	81.7277	67.8015	52.4777	60.7038	50.3669	114.695	89.4685	57.9696	92.1476
NM_001000459	77.0069	74.4696	60.5834	80.6711	70.4116	86.9318	40.3533	73.2387	90.5156	67.3184	48.4759	50.7402	89.224	95.0384	47.3645	70.0671	45.8894
NM_001000460	190.054	210.839	78.8263	119.781	125.078	56.5017	113.456	62.1368	157.038	80.193	53.2272	67.2152	99.9354	186.492	87.2858	50.3095	67.7096
NM_001000461	210.872	168.834	189.69	125.608	182.771	122.348	177.2	68.8487	191.377	99.2837	79.5363	99.8146	178.723	188.825	265.131	131.477	154.587
NM_001000462	193.071	124.868	60.4457	69.9348	93.5368	77.3587	58.546	51.0305	90.7721	100.543	52.1246	76.2247	243.881	106.201	82.8265	60.0147	66.2025
NM_001000463	574.66	666.333	881.865	868.153	517.508	587.602	427.02	421.994	589.027	496.293	482.357	482.053	459.944	709.446	492.909	498.962	247.78
NM_001000464	189.157	70.5	135.722	68.762	72.8615	45.1969	58.3318	52.7444	66.121	71.4576	56.6584	70.0561	84.6441	112.171	91.1788	68.451	43.4583
NM_001000465	248.676	85.2361	111.424	141.575	162.811	57.6722	60.2892	66.7106	130.307	76.7916	76.4698	75.2194	78.4701	151.553	83.114	70.4105	65.6975
NM_001000466	1901.11	2997.83	1425.54	3734.64	1599.32	2087.26	2129.53	1951.51	2486.95	1836.04	2285.6	1980.17	2304.07	2066.83	1810.67	2204.55	2063.5
NM_001000467	151.919	174.294	119.142	343.23	143.497	187.489	105.012	105.296	172.727	140.345	133.14	123.407	113.035	163.046	140.054	162.456	126.803
NM_001000468	132.749	127.645	97.4007	189.362	113.102	74.2777	93.5137	103.975	88.848	87.7537	93.953	90.5181	172.691	133.82	86.2025	145.989	92.5423
NM_001000469	77.3744	97.8443	70.9926	102.682	69.5315	64.2603	64.0359	62.724	61.596	70.5048	75.9366	72.5742	66.846	126.414	79.7441	66.5147	59.8813
NM_001000470	110.478	123.57	67.7703	124.035	110.7	53.5843	79.3812	53.7047	92.8235	75.5516	44.7782	66.532	101.738	140.567	58.5722	95.516	51.6825
NM_001000471	216.986	356.871	318.645	932.847	220.85	380.965	409.929	264.732	267.778	354.317	297.575	317.588	216.576	312.084	317.854	274.857	251.393
NM_001000472	53.4936	74.2476	102.998	82.4479	78.4658	50.6803	61.0381	65.5282	88.0884	66.5465	51.7529	37.7311	50.7422	111.572	48.6802	59.0947	55.2269
NM_001000473	220.337	294.293	332.148	548.808	147.888	231.921	154.549	161.736	145.221	317.012	167.773	269.268	110.666	204.654	213.125	299.761	203.878
NM_001000474	103.287	123.884	106.428	140.803	88.2631	63.7741	98.1274	73.3378	89.9537	92.9037	75.6878	82.7194	173.632	130.155	51.8806	87.956	64.5789
NM_001000475	105.42	101.681	76.2137	129.806	202.987	74.7662	62.9722	61.4424	132.136	63.3365	59.7737	54.9786	56.9336	115.627	54.7177	92.5318	86.3647
NM_001000476	482.969	583.155	223.535	708.81	401.951	215.175	201.716	186.793	298.106	258.598	196.338	318.587	340.153	423.742	339.783	227.263	154.885
NM_001000477	74.5983	95.2721	76.3091	63.0811	74.8386	77.343	106.962	53.3919	66.4948	70.2617	59.3807	47.8524	87.1755	107.39	79.1011	56.8082	81.4603
NM_001000478	123.706	215.749	144.874	341.718	140.987	211.976	222.344	200.956	214.296	216.148	170.118	206.252	102.427	172.056	185.774	296.422	268.21
NM_001000479	174.713	339.204	194.91	150.741	196.185	158.999	95.1066	132.457	265.916	194.976	90.4554	99.4198	147.471	333.022	95.3354	124.07	156.932
NM_001000480	412.88	679.466	314.103	694.307	335.313	262.187	164.802	144.444	472.532	291.211	208.671	236.737	357.027	451.038	317.139	224.519	270.627
NM_001000481	83.4761	71.2568	51.4734	83.3681	54.442	49.8347	58.1498	58.2242	100.199	54.1948	49.472	65.8968	55.5255	57.1439	44.6249	54.2652	63.2298
NM_001000482	167.522	266.61	260.785	268.498	146.155	227.971	144.905	103.682	161.651	273.423	123.318	171.207	124.755	255.575	168.166	206.748	194.731
NM_001000483	112.783	103.261	143.917	224.056	71.9218	142.007	118.915	88.0408	69.7106	83.1966	84.3912	103.699	66.7371	99.6315	119.315	146.696	118.3
NM_001000484	170.085	287.618	91.2627	357.013	171.364	97.1849	88.0049	89.0035	213.43	159.253	115.708	80.2097	117.345	317.226	86.6776	116.221	112.292
NM_001000485	165.443	264.937	234.873	185.132	123.888	104.063	81.1504	81.02	138.005	116.853	129.163	149.779	100.388	164.201	125.982	136.072	85.7966
NM_001000486	890.174	1139.86	433.718	1339.64	505.56	399.904	388.261	303.945	451.784	688.178	388.991	282.193	363.153	740.705	429.98	767.398	162.662
NM_001000487	1640.71	1733.37	1236.33	2633.01	1382.22	866.607	1746.09	890.3	1593.87	1262.98	866.329	1537	1619.42	1685.16	799.377	1617.58	989.428
NM_001000488	72.4455	70.8866	83.4267	63.7664	66.1536	59.2451	58.2901	61.1105	60.3116	61.9969	67.6327	61.2764	89.9634	62.532	75.8682	50.7315	54.1292
NM_001000489	123.445	166.706	261.516	264.92	126.295	104.702	82.2212	89.019	100.244	164.877	105.851	116.685	97.9105	178.427	61.076	84.7706	79.6939
NM_001000490	150.422	107.9	153.416	173.368	83.297	69.0682	91.4224	51.4217	125.968	127.894	185.888	60.5277	135.338	97.7408	69.4371	85.9841	79.8192
NM_001000491	90.1882	99.0798	99.188	86.6706	51.4162	62.0213	56.1598	71.9881	73.7266	91.6316	76.8889	144.709	74.6268	58.4088	46.1183	54.2858	61.7556
NM_001000492	81.708	88.3755	111.882	101.367	61.5046	49.1848	63.4872	48.1378	56.3282	54.4939	53.7574	88.1035	62.9314	67.6544	42.0224	74.3838	42.2479
NM_001000493	158.643	302.012	154.562	370.343	192.767	130.521	185.188	139.802	228.596	195.481	111.569	166.339	223.845	230.873	133.889	138.351	118.939
NM_001000494	126.74	264.072	186.009	253.82	144.19	151.497	128.656	73.2848	137.26	126.374	87.2967	136.005	116.437	145.232	123.113	88.1835	108.593
NM_001000495	125.144	127.861	115.651	202.352	175.378	67.7201	83.5232	68.5692	115.892	112.532	105.121	109.188	137.489	116.619	64.1975	127.75	53.0124
NM_001000496	105.981	115.66	77.7411	101.868	77.7124	47.1314	63.4158	61.3315	98.1753	54.1552	51.6658	51.9406	68.4796	139.544	60.7478	57.342	65.2505
NM_001000497	80.2933	115.797	130.939	112.562	76.2556	101.099	100.358	84.3934	104.703	105.886	96.017	88.3348	307.694	159.082	117.937	77.2496	64.9892
NM_001000498	70.1011	58.3889	55.0679	60.1679	88.2524	44.3447	45.7563	43.3613	48.8936	43.1089	40.8522	48.7816	86.27	88.7597	42.0116	44.3576	44.3364
NM_001000499	84.2836	74.7098	89.9238	98.5868	77.342	47.3742	97.0192	77.8523	89.9023	47.414	46.0723	55.6232	58.3308	80.2959	65.5815	250.628	52.5205
NM_001000500	107.802	147.059	89.3562	94.0551	118.536	88.6647	111.641	99.158	107.207	109.188	63.8743	135.261	123.488	121.246	79.7271	116.462	98.7113
NM_001000501	105.007	202.724	164.696	178.014	99.9613	101.392	93.8965	93.8272	105.598	114.522	53.802	136.308	91.0405	211.076	76.7425	109.439	61.9932
NM_001000502	129.119	112.943	102.848	94.7356	128.283	118.019	94.2953	91.2076	93.6588	132.075	75.5498	88.8945	125.686	90.4485	113.478	101.588	69.7419
NM_001000503	96.2113	144.672	130.417	240.113	133.655	113.339	144.919	102.762	146.224	115.563	76.634	105.355	87.7411	102.634	93.77	95.4462	78.2607
NM_001000504	159.142	188.495	93.5697	221.638	160.781	120.606	155.068	125.774	243.71	129.564	140.314	179.74	165.836	217.088	166.284	111.099	141.343
NM_001000505	89.2881	77.8688	112.87	69.1487	52.9148	52.4771	83.7689	46.4339	66.4361	87.0825	51.1405	73.6881	62.2023	78.1227	55.2714	84.2183	55.5827
NM_001000506	219.85	265.852	167.206	308.75	174.027	166.053	175.698	115.803	230.983	130.685	156.254	157.293	148.169	292.511	127.816	177.894	113.2
NM_001000507	528.889	474.893	499.829	870.182	432.865	408.304	482.216	379.721	414.233	469.258	548.322	286.707	1210.14	692.751	421.384	228.487	316.588
NM_001000508	272.778	190.599	139.544	192.726	153.963	88.2672	53.1769	63.66	142.528	91.2794	102.135	82.1106	123.588	174.27	108.512	138.985	103.09
NM_001000509	367.175	325.313	99.8853	166.859	129.457	78.7708	60.4878	54.2329	172.478	71.3322	72.603	74.072	214.452	181.797	71.3478	199.354	62.8121
NM_001000510	94.2391	168.096	117.814	102.237	70.277	79.8745	56.7862	78.3163	84.7401	143.484	64.228	63.9166	65.1674	158.789	62.6578	83.4577	54.2717
NM_001000511	137.782	119.046	103.073	71.1132	103.053	72.5462	76.9135	60.1886	81.136	75.3096	58.9218	88.475	84.8404	61.3643	62.5479	72.4382	80.9741
NM_001000512	64.8451	81.0532	85.721	38.9731	65.5442	52.8838	61.8983	46.6384	58.5732	47.5751	36.7734	71.0848	49.4933	58.0547	48.3747	71.8836	66.5933
NM_001000513	122.794	118.277	105.364	110.04	108.941	49.6275	51.1299	46.9731	118.508	95.6832	57.4432	56.4093	64.8665	137.26	66.3203	93.6334	59.7231
NM_001000514	96.8781	90.6084	68.2361	155.702	151.934	72.2347	66.9504	64.8428	183.564	125.504	137.763	52.7086	78.2979	303.821	77.9917	75.3676	61.1432
NM_001000515	168.2	228.604	183.337	208.226	123.136	95.182	102.627	118.518	167.15	186.222	150.269	101.343	97.2984	110.28	97.9503	178.04	144.245
NM_001000516	100.231	131.653	90.041	129.95	149.005	52.664	49.1205	56.0099	103.962	74.6931	56.8003	54.9585	93.4483	115.091	42.5499	62.0778	105.242
NM_001000517	107.424	210.506	121.93	149.125	82.2834	91.9968	129.752	94.543	102.501	93.9828	80.4838	109.27	117.435	144.612	159.705	99.2129	132.969
NM_001000518	101.337	70.9435	71.2405	71.2862	82.1991	60.7056	56.1982	47.9822	62.3563	52.7366	63.5062	43.5148	74.9289	70.7737	55.2714	49.8228	42.7207
NM_001000519	88.8521	85.6514	111.799	71.3226	79.2473	103.248	72.7158	89.246	62.3902	73.4292	69.9026	72.4823	74.6163	65.372	105.48	92.3502	56.7394
NM_001000520	153.081	242.992	119.52	104.565	138.214	80.4464	138.389	73.9272	135.99	119.079	75.7935	125.376	158.052	202.387	89.4313	94.9773	101.88
NM_001000521	113.504	169.49	120.154	121.661	68.3892	81.4657	93.8427	71.4165	117.702	91.2912	82.9919	64.0615	97.5706	111.751	65.4689	111.596	43.2369
NM_001000522	179.136	156.703	127.624	77.6005	90.0567	66.375	76.8695	75.682	71.2801	55.8895	94.6964	84.0719	90.6148	165.694	164.213	99.6169	255.253
NM_001000523	398.478	599.613	230.996	528.172	257.586	206.263	221.791	119.464	265.435	321.282	203.236	137.503	166.1	282.285	265.693	227.272	182.056
NM_001000524	137.292	198.232	97.311	118.425	127.641	122.618	55.2855	60.7574	58.3195	110.387	92.7425	57.866	98.782	123.958	58.8619	64.4255	225.796
NM_001000525	428.156	545.947	352.542	396.229	386.922	335.821	340.328	387.34	554.033	351.989	367.338	428.692	570.67	509.854	319.467	463.973	316.104
NM_001000526	112.913	160.126	106.132	160.412	84.6209	84.4774	81.1637	66.5578	72.9029	108.343	72.2837	97.8597	65.4083	92.9955	67.4449	99.9183	82.0788
NM_001000527	2002.08	2135.84	786.039	1814.67	1145.5	494.785	362.908	357.198	905.76	916.346	504.464	661.083	441.917	1443.74	654.029	1079.26	568.976
NM_001000528	183.268	313.234	131.734	273.163	178.957	103.328	177.512	74.2045	257.881	119.413	70.4478	197.795	223.251	245.07	145.808	187.22	112.166
NM_001000529	316.548	463.636	165.603	579.584	147.543	165.449	96.6026	71.0116	311.301	168.324	73.0438	132.702	166.534	185.927	98.2779	112.712	126.184
NM_001000530	78.4319	56.5642	55.7136	75.307	74.814	62.7693	44.3841	40.8186	57.887	43.8218	43.6588	60.7977	58.9351	65.5716	44.5912	52.6182	53.7085
NM_001000531	97.0092	96.5609	58.0015	52.2414	80.4159	52.1502	70.566	49.0944	80.8493	62.0223	49.2363	88.3447	84.09	89.6389	67.0126	57.4126	48.0635
NM_001000532	102.183	167.942	85.6929	126.107	90.2893	56.583	55.4497	41.5032	92.2796	72.1139	62.9345	54.5002	121.453	137.324	67.899	117.001	57.0291
NM_001000533	85.5082	105.818	86.4648	102.62	76.4245	43.6551	59.1943	52.3443	56.7798	77.2585	54.036	51.4156	55.2783	72.3896	55.8802	84.6888	66.4597
NM_001000534	120.048	107.974	107.701	87.4471	55.237	59.9031	45.1604	65.2376	89.8096	78.3576	102.269	74.7229	86.8646	106.184	71.318	81.1072	94.7571
NM_001000535	120.328	94.129	147.73	159.709	89.423	64.3195	47.7841	44.4682	86.0293	79.807	52.7181	55.6563	72.8694	139.977	97.99	59.0835	87.7046
NM_001000536	260.784	384.409	295.517	270.759	175.659	177.279	79.2349	97.2221	144.357	189.747	133.267	100.124	115.222	181.83	143.837	148.063	102.475
NM_001000537	192.687	182.169	120.505	210.306	111.824	110.853	111.283	67.3135	119.584	155.117	105.281	67.4499	72.362	111.809	122.105	114.57	69.7293
NM_001000538	651.658	626.153	143.806	243.908	345.379	195.833	168.97	154.832	419.39	255.257	203.848	237.692	448.754	365.088	215.937	194.018	216.402
NM_001000539	95.3656	158.909	78.9366	163.921	77.6275	99.186	92.5078	87.3332	110.057	86.8767	81.0767	66.1396	88.6153	110.799	70.2571	96.8437	72.0992
NM_001000540	77.4059	89.2847	81.2449	201.944	77.5997	115.269	108.225	70.697	51.3512	68.7548	68.6422	82.8976	76.0925	88.9465	70.8637	158.91	72.857
NM_001000541	194.24	276.215	141.401	166.899	94.9623	131.563	90.9174	117.554	141.696	224.949	85.3802	173.124	96.1416	144.691	136.292	113.374	85.4706
NM_001000542	67.3971	85.0781	122.075	67.8256	88.4548	55.87	54.5822	52.1556	81.1304	67.7569	81.697	91.3267	51.7403	101.438	49.3927	43.251	54.5012
NM_001000543	64.3527	66.5163	50.9951	76.8696	71.2718	74.3012	43.673	52.9032	54.12	107.097	62.7247	65.207	53.4628	66.9704	64.3559	90.9471	58.9159
NM_001000544	122.118	148.388	109.833	119.852	88.4641	66.7388	99.6472	64.7762	93.9144	123.568	84.1283	106.255	74.3992	126.932	62.6019	91.4976	74.405
NM_001000545	72.8662	54.8515	69.7186	61.4874	64.6374	59.8316	80.8734	75.1901	72.8099	65.8814	62.6827	64.8408	118.687	61.0038	71.0442	57.9896	51.5834
NM_001000546	64.2491	153.21	215.599	264.667	156.143	108.616	82.3526	80.9591	166.638	107.371	65.4732	88.8189	69.6684	135.471	64.8373	101.55	73.2018
NM_001000547	175.651	286.136	132.355	186.753	224.786	136.444	92.3242	94.2363	185.504	108.797	127.558	95.8836	106.976	327.106	104.777	96.781	142.136
NM_001000548	78.2627	88.0097	128.388	81.4371	78.2303	55.3423	64.098	51.3069	50.5853	81.764	54.7248	66.5063	67.9096	68.4422	68.107	81.4128	53.0325
NM_001000549	144.927	153.279	116.016	82.6957	134.555	100.374	66.5606	55.4376	134.79	89.4152	73.6124	110.204	62.1131	122.43	85.7061	107.062	99.012
NM_001000550	608.956	289.925	348.477	423.743	302.292	537.669	284.84	173.076	348.754	366.818	360.433	219.55	260.177	335.705	271.018	228.237	425.371
NM_001000551	79.3301	106.518	61.7133	76.0836	75.9302	57.8148	66.0774	41.8685	78.438	58.0447	58.1066	45.9482	76.0349	79.4433	86.6001	54.8138	71.9362
NM_001000552	272.836	385.636	130.923	233.804	239.754	116.221	87.2868	108.325	285.495	115.041	146.065	87.7782	288.735	319.859	71.2329	107.923	61.1506
NM_001000553	127.427	85.4501	63.6611	134.573	84.144	58.705	47.8782	64.4816	71.2932	76.7248	51.2703	56.0286	65.3608	101.912	78.2416	107.243	68.216
NM_001000554	101.706	121.913	82.0923	200.528	79.603	90.4884	47.1765	71.0529	68.3658	83.0146	70.4862	94.3508	84.8454	96.72	71.385	63.5666	70.6887
NM_001000555	50.361	63.8575	37.3225	38.9609	58.3309	44.6998	40.0712	46.7529	52.5248	38.5996	48.3515	36.0577	49.373	46.4465	36.5196	36.7188	42.971
NM_001000556	75.2622	91.2768	66.2319	70.9042	84.7634	54.256	47.5351	54.8484	91.2986	84.4885	72.5379	65.524	111.432	103.056	93.5665	63.3876	56.2536
NM_001000557	90.5718	164.857	102.67	73.9373	87.4265	71.5107	64.4547	56.2305	109.888	74.165	61.671	78.712	90.4754	100.595	69.7096	99.5194	56.3558
NM_001000558	181.213	223.179	182.394	385.326	186.231	150.11	186.664	126.891	177.119	193.789	190.96	129.64	214.813	302.961	134.699	205.034	172.23
NM_001000559	221.746	161.36	134.397	125.043	111.657	57.9542	79.6745	64.6266	104.169	82.7207	91.3219	62.1181	96.0848	110.618	71.6483	82.1637	74.7949
NM_001000560	282.385	184.231	131.164	119.488	260.64	83.6359	91.0613	64.2316	200.45	84.2412	84.3486	99.6258	145.275	166.203	81.7735	104.556	76.1793
NM_001000561	198.414	302.557	177.619	203.253	171.187	120.322	112.126	92.4558	163.798	125.348	103.629	93.2162	194.756	204.15	139.152	112.651	108.375
NM_001000562	266.999	237.877	111.244	138.838	166.311	86.9213	61.06	49.4431	138.252	118.198	47.8016	84.459	90.4407	142.888	69.9469	93.202	52.9191
NM_001000563	55.8051	123.271	42.1114	40.9758	59.4284	43.8718	57.4294	47.8721	72.4942	52.2898	77.7665	44.1826	69.9277	89.361	44.6129	44.5843	50.8835
NM_001000564	104.166	126.674	86.3165	88.5078	137.685	79.7947	77.437	84.4312	102.885	72.5109	86.9607	110.463	75.6443	150.076	121.683	117.076	160.96
NM_001000565	161.167	346.185	109.773	233.363	151.079	75.4394	63.2598	94.1271	219.364	81.2515	50.2039	53.7031	109.694	251.173	57.5378	77.0638	58.7775
NM_001000566	104.049	84.1775	93.674	166.686	78.3126	49.0374	45.951	40.7579	94.5709	64.094	50.358	60.0351	54.641	95.0354	75.0741	52.4714	50.9685
NM_001000567	86.8994	87.4102	98.1743	60.0913	87.7659	67.8244	38.9364	45.961	76.0749	50.5895	42.9156	76.8407	79.2646	171.596	54.0543	38.1602	64.1124
NM_001000568	53.0415	64.156	56.7147	65.9172	54.0343	66.7792	44.881	48.1073	69.1552	63.2132	49.5937	56.9554	73.3176	58.0065	56.563	55.9017	49.0014
NM_001000569	161.383	264.105	101.939	119.228	208.342	135.58	123.766	91.2024	162.806	121.065	88.2007	75.3522	159.726	150.443	109.808	92.4721	111.961
NM_001000570	154.4	159.15	105.194	138.306	98.4869	73.0249	65.4791	53.8224	117.527	83.8946	71.6603	65.6218	120.287	140.784	57.1201	84.6022	59.7683
NM_001000571	93.2542	97.3881	83.1588	56.9823	96.7967	281.074	60.3684	72.7772	56.2607	66.1945	52.1522	69.5699	176.313	79.5512	63.7398	67.1691	147.976
NM_001000572	62.1726	64.7849	60.0582	49.9631	45.7924	49.0508	47.6784	41.6716	55.6111	49.5289	54.0497	60.4259	44.9734	47.4372	46.8111	43.1322	43.8094
NM_001000573	190.249	155.389	67.5439	128.682	122.167	53.6989	65.8481	64.0279	148.708	86.0142	75.7962	69.8002	144.077	121.653	98.1241	63.8842	91.0427
NM_001000574	81.8598	114.559	146.156	318.683	109.712	157.588	54.2207	89.5651	91.4613	71.7482	105.299	136.058	97.5325	90.0659	61.4299	139.535	54.0511
NM_001000575	75.6845	55.9439	114.428	74.9195	62.3996	63.2998	135.147	81.6978	66.5505	97.9923	72.7437	89.9683	90.1753	61.6852	83.1829	84.0343	108.155
NM_001000576	211.714	227.689	138.836	257.935	153.809	78.2643	73.7825	56.582	140.365	194.953	55.8173	80.7938	179.894	202.918	96.5662	86.4567	79.8264
NM_001000577	376.941	395.871	311.186	592.103	398.18	160.19	148.359	157.955	248.034	281.775	150.419	247.618	149.663	470.476	234.443	217.814	161.227
NM_001000578	156.926	159.247	72.1123	128.804	131.964	108.362	100.378	102.064	139	111.911	86.8306	132.863	121.805	131.289	150.153	97.9251	107.579
NM_001000579	117.554	100.088	85.4731	125.692	129.302	76.6059	82.4795	58.4133	74.4673	79.5532	94.9437	63.1513	96.994	94.7211	47.9576	72.2474	80.1173
NM_001000580	205.467	229.896	164.419	210.21	129.608	86.6213	131.053	79.4455	183.196	158.843	100.809	121.438	124.46	239.556	102.851	175.75	104.315
NM_001000581	106.898	288.954	143.323	124.792	197.222	123.887	80.1783	61.2712	115.917	92.3821	78.3158	130.632	86.0951	126.731	115.772	98.6303	155.362
NM_001000582	113.895	104.979	127.144	104.032	134.778	80.9136	157.388	68.0107	101.723	89.462	88.648	112.75	123.477	113.317	239.741	112.355	197.05
NM_001000583	187.744	329.058	256.82	306.611	306.225	186.972	159.308	103.975	257.304	188.965	145.356	233.563	162.651	282.351	201.878	150.781	436.738
NM_001000584	199.979	319.461	138.512	268.799	172.861	108.376	140.421	95.5509	210.271	190.705	119.048	143.146	184.374	267.804	81.0268	120.172	70.007
NM_001000585	86.621	97.8042	83.0735	79.1858	83.2328	84.3062	99.2627	77.9232	83.905	101.95	66.9678	74.7777	82.539	80.4279	74.001	110.573	119.312
NM_001000586	140.219	64.5923	90.6265	61.0682	67.13	44.9841	43.9077	75.8422	55.9477	74.2714	61.9728	57.5695	84.2231	107.597	57.2683	67.7113	48.8053
NM_001000587	93.3203	165.871	138.434	171.583	127.233	80.5085	67.2108	44.0833	101.114	110.406	106.576	58.5648	85.1423	121.35	83.7185	88.075	75.2967
NM_001000588	387.152	376.346	135.182	240.018	237.065	96.4185	123.859	108.304	287.661	178.398	73.6321	107.887	241.474	344.306	97.6014	206.256	107.708
NM_001000590	237.832	284.75	185.852	273.757	225.437	125.035	146.798	96.9833	167.328	202.466	162.215	122.346	127.336	316.83	108.419	196.06	192.907
NM_001000591	264.19	329.966	298.974	467.637	159.193	188.886	104.848	119.079	271.4	137.315	80.7826	114.499	96.3484	229.294	95.984	83.2651	105.506
NM_001000592	172.582	256.219	84.8677	99.5685	176.86	50.1595	55.1204	54.5248	155.748	104.325	58.8799	74.4755	85.9166	174.38	73.4769	111.14	128.728
NM_001000593	284.272	428.977	151.793	367.499	250.892	130.741	51.6336	85.4716	141.971	99.771	72.4201	128.471	216.364	249.863	76.1174	142.572	129.321
NM_001000594	371.918	279.409	169.807	235.788	231.234	91.46	126.813	67.825	285.778	120.856	104.162	129.803	350.811	314.829	60.8523	97.9121	91.0499
NM_001000595	159.142	297.487	273.782	604.462	133.277	124.438	272.601	166.062	180.82	340.898	98.4329	252.493	147.838	239.008	197.448	245.481	94.8516
NM_001000596	230.877	313.024	127.636	103.626	182.704	131.057	68.9178	55.19	159.094	104.845	75.8247	76.2895	109.406	219.007	98.0737	68.0527	67.3269
NM_001000597	72.5652	72.9466	72.5467	63.5386	60.1327	55.392	67.6658	53.9072	63.7743	56.8146	42.5499	35.1045	51.0924	165.788	58.7376	55.1792	58.9695
NM_001000598	279.431	328.881	199.87	427.392	212.015	108.854	95.8998	113.388	195.146	119.447	67.663	129.065	153.625	230.667	84.4446	98.003	108.094
NM_001000599	198.247	186.681	88.7708	157.748	67.7084	70.2151	70.6787	145.742	83.6773	91.1044	168.499	88.2358	62.9545	83.8476	67.6483	70.3385	74.0754
NM_001000600	84.9731	84.9398	65.1283	58.5836	78.0821	77.0232	85.8788	64.7193	98.265	58.2732	53.1001	66.9517	64.9673	93.6946	58.4733	62.9423	88.4363
NM_001000601	124.735	212.7	84.1817	122.626	138.516	93.5279	80.6367	86.9169	173.369	98.1283	102.773	67.9833	144.157	159.651	89.0314	107.485	95.1294
NM_001000602	45.5637	67.0267	42.5564	51.4931	48.3192	39.6866	39.3669	42.1333	54.7923	46.759	42.613	41.8583	50.6546	63.5765	36.2256	37.5836	35.8423
NM_001000603	68.8349	75.3869	65.7443	81.2373	63.8436	45.2387	69.7539	50.156	52.519	58.3718	61.1039	53.73	56.7188	74.896	49.4619	64.3427	62.9294
NM_001000604	156.696	109.952	97.7293	158.97	394.993	79.6099	69.9075	71.8045	127.567	121.593	118.67	92.3071	151.028	221.668	105.567	173.593	65.4242
NM_001000605	86.9412	117.83	62.9948	54.3138	59.3421	51.1255	60.1212	54.3897	76.6339	59.9474	50.5082	75.176	84.7252	78.2268	55.7888	62.7142	68.4436
NM_001000606	409.718	547.65	385.772	499.546	322.241	171.813	128.558	139.468	223.391	227.088	141.833	127.105	130.088	422.264	158.575	161.941	214.485
NM_001000607	135.523	143.935	76.6871	91.2133	102.531	53.3051	71.3139	69.4388	75.8074	78.7697	68.5498	60.7605	65.5294	95.3908	107.452	58.2363	79.9185
NM_001000608	112.796	223.373	140.346	233.621	104.143	110.241	95.4594	76.9509	93.137	107.255	76.22	103.38	98.4119	170.137	81.7678	81.291	52.3013
NM_001000609	63.4559	59.8698	42.2926	54.653	61.2284	55.7875	62.4433	53.0493	48.6727	61.0182	74.2297	47.7812	82.1831	61.8709	63.1247	67.929	42.5077
NM_001000610	100.631	88.1831	74.0124	122.558	67.3023	64.2257	114.989	57.1308	70.8231	62.7543	59.9801	63.3667	138.043	92.0805	80.8105	97.9347	71.3778
NM_001000611	92.6571	128.911	69.5621	71.9217	77.5208	76.5276	52.4272	48.4352	96.7974	64.9691	49.3729	42.051	81.1545	152.809	50.9449	63.0723	55.0678
NM_001000613	72.6354	91.0749	71.1637	68.3221	87.6963	56.6368	85.4624	56.497	88.6101	53.4888	59.4469	68.4828	65.6237	76.5506	42.7669	103.815	43.4211
NM_001000614	76.923	56.3043	59.7681	86.3288	66.4352	53.7877	46.3682	90.5448	53.9007	47.688	50.8282	55.5989	54.2294	90.413	57.5824	61.9878	42.9137
NM_001000615	360.177	249.608	305.479	361.356	152.301	122.46	59.9841	117.754	107.926	153.162	71.8184	102.156	296.369	132.334	117.457	309.822	99.0977
NM_001000616	166.192	113.504	71.8794	68.1957	93.6804	46.6096	47.632	45.4408	57.005	52.8257	56.2672	57.8673	96.6317	72.981	65.7394	100.747	59.0747
NM_001000617	226.511	192.821	153.087	296.952	130.009	102.236	146.356	87.4135	128.962	226.266	108.229	125.033	140.056	155.532	96.4246	142.521	105.925
NM_001000618	355.534	274.733	221.709	372.449	233.235	135.012	99.8891	144.678	242.358	125.573	137.846	135.963	154.597	334.424	134.207	116.146	153.474
NM_001000619	127.709	128.555	82.629	140.137	87.1559	72.9269	59.8182	81.5162	110.263	78.0023	101.005	66.19	101.883	121.694	95.761	359.611	88.7727
NM_001000620	91.2059	78.3311	69.6135	73.7108	54.6992	51.0009	56.4782	38.1112	69.4071	59.9178	50.9687	72.4747	59.7571	62.523	59.2451	69.9405	50.7762
NM_001000621	97.5676	144.888	95.2958	199.133	109.376	57.8311	75.3138	53.8736	108.633	63.7472	39.248	55.9529	80.0829	86.434	70.7126	66.5012	67.5982
NM_001000622	70.9232	74.878	60.7904	66.2512	131.464	53.7028	50.0093	55.0862	67.2398	54.3662	55.5404	45.962	55.0507	93.2184	74.3796	46.9089	39.6254
NM_001000623	123.648	175.882	117.108	202.501	85.6815	69.5782	76.9108	74.9759	95.7733	93.498	52.1933	61.6066	93.4443	83.5592	57.2988	84.611	49.5289
NM_001000624	78.4245	211.119	130.517	76.2897	121.999	99.9918	97.2299	92.6375	183.66	108.002	62.8246	98.5732	72.0535	139.502	226.068	130.913	92.9902
NM_001000625	65.3531	80.8979	51.6814	48.4908	74.4702	55.5335	69.4868	49.6384	61.8025	55.276	42.7182	39.8929	61.2511	58.3679	47.1459	62.2762	57.9601
NM_001000626	172.337	143.617	95.0372	95.1858	76.6481	66.4536	69.378	57.3328	63.3381	64.352	60.8081	112.09	107.796	91.2361	51.4949	61.3693	65.7505
NM_001000627	196.056	107.576	110.555	103.626	89.261	75.5457	124.981	72.4817	93.4556	68.5889	90.4799	60.2518	74.1255	132.9	62.9564	66.3886	74.4862
NM_001000628	211.641	132.943	89.7394	99.5244	96.5046	74.1559	109.408	73.1312	182.341	74.6136	81.4911	60.0167	100.21	107.131	100.961	95.159	78.9593
NM_001000629	167.662	170.882	144.232	216.765	151.557	100.021	108.67	150.738	135.983	112.384	132.53	84.4795	100.147	235.286	109.295	114.106	76.9009
NM_001000630	64.3891	62.471	83.8567	106.501	80.1653	74.0344	79.2427	59.4435	80.4	86.8366	55.312	67.8127	74.6737	87.6062	49.5895	69.3141	60.9396
NM_001000631	83.8136	64.4939	49.7612	64.628	66.6275	53.1268	61.7924	93.6512	50.2741	59.7689	65.518	41.4309	71.1091	113.99	54.2064	99.0724	56.8445
NM_001000632	134.075	124.906	136.439	183.149	103.023	62.4463	66.6723	64.0809	74.4818	83.2824	71.0314	71.8839	66.8949	93.3791	60.3113	86.5983	66.4409
NM_001000633	90.6506	84.9054	68.4488	106.229	73.9463	52.74	61.2127	71.3459	74.3215	86.6947	112.266	55.356	61.6017	80.6285	41.2095	51.682	74.4638
NM_001000634	80.2833	131.747	60.1537	102.457	147.57	47.4723	47.1117	63.8664	112.001	47.3304	44.6363	54.4722	89.3977	115.011	37.4992	50.3671	47.9419
NM_001000635	66.8458	63.5253	59.3572	91.4428	64.1959	52.9577	53.3469	55.6104	110.826	49.5753	48.1442	45.7795	58.2112	76.9172	48.961	43.6615	44.948
NM_001000636	105.15	169.948	60.2941	59.3939	82.5934	64.314	43.9498	46.6804	84.9483	55.8085	57.2821	53.9046	109.997	99.7522	52.3112	63.3149	73.3396
NM_001000637	171.466	254.317	94.3884	264.885	161.644	84.147	156.194	91.6592	177.603	151.569	71.6201	109.647	154.546	154.029	99.7289	94.4442	111.311
NM_001000638	762.64	714.612	412.016	1353.7	482.764	362.067	255.44	306.962	673.952	495.378	335.966	397.967	475.446	799.4	360.269	460.559	250.932
NM_001000639	128.507	198.726	145.842	121.239	111.349	108.256	131.744	87.2225	105.406	94.5469	101.231	90.4826	88.6033	127.772	81.2964	98.0346	188.943
NM_001000640	56.0432	54.5432	72.5462	53.9422	64.1413	51.3408	43.7154	36.4918	67.8154	62.5978	41.3355	44.2861	49.6026	78.6761	46.3295	43.1454	47.1507
NM_001000641	85.4504	85.1694	69.9525	57.2127	74.4703	50.7754	54.221	43.1322	79.5811	61.0174	48.6302	75.366	80.8878	98.4311	47.2648	42.9822	64.9301
NM_001000642	65.7097	103.895	63.0173	53.6266	77.9415	38.9238	135.222	55.6535	107.591	54.8263	45.8022	54.8996	86.2412	83.4676	49.6204	57.0536	47.4962
NM_001000643	144.336	96.9291	112.15	98.1454	153.229	75.6108	75.3138	72.0945	123.243	68.4137	81.9551	66.8694	111.611	113.013	73.3969	85.4832	66.4363
NM_001000644	51.0672	46.9422	39.1377	65.3914	56.6298	49.5015	48.9816	40.9085	56.3524	41.2823	38.7631	42.5538	54.6561	44.6069	51.3892	39.531	32.591
NM_001000645	121.766	77.1563	46.004	63.4837	110.652	41.0514	60.2932	52.2785	109.938	45.8449	61.0322	54.7925	55.6362	162.922	44.7811	47.547	54.4823
NM_001000646	205.267	111.584	145.373	144.472	232.31	114.37	71.9646	84.7463	72.0663	120.475	63.1768	82.172	93.8282	224.618	121.908	124.913	136.418
NM_001000647	66.9423	69.3759	53.7721	88.6237	87.7345	44.5807	50.8281	44.7806	95.6487	51.0634	45.763	43.8557	52.3983	70.664	47.6421	57.6533	34.1158
NM_001000648	131.688	114.472	110.864	221.798	143.764	88.7908	70.2836	60.252	100.619	80.4483	71.3814	51.5764	91.488	132.744	77.816	67.7966	51.101
NM_001000649	183.884	221.038	117.386	287.074	162.033	103.858	104.952	91.9233	162.255	126.369	103.303	100.739	180.596	188.673	103.672	112.532	93.5004
NM_001000650	101.621	120.787	61.0054	90.6457	110.075	67.7947	66.6496	56.1137	97.1034	51.5012	76.2192	66.0201	102.145	79.8604	63.0532	81.913	93.227
NM_001000651	254.919	139.851	260.637	403.445	120.923	180.864	128.739	123.972	173.326	164.878	119.904	169.612	137.088	254.792	128.331	202.363	121.687
NM_001000652	98.3871	98.77	74.8592	94.8922	52.8337	43.4807	61.6539	44.1977	49.9207	56.4363	53.2516	40.4101	78.4701	69.0714	48.733	49.3385	57.4006
NM_001000654	189.671	309.055	102.471	113.587	110.384	79.6158	94.8251	70.9867	240.438	75.5303	65.8396	102.561	178.545	266.919	69.7954	107.391	114.706
NM_001000655	94.2858	130.689	62.403	70.5398	107.562	78.7558	60.5705	42.4797	95.4812	57.0797	55.5919	64.7493	82.3512	133.357	63.5832	56.6882	61.7447
NM_001000656	90.0568	71.5644	71.5274	62.429	90.2561	58.8247	84.1111	44.9532	129.257	58.765	67.8559	60.5998	92.5387	76.5892	75.7165	78.2696	91.2633
NM_001000657	95.2641	80.5499	103.234	133.728	126.252	62.9575	103.611	57.7416	156.746	81.8891	70.6623	97.7055	143.053	146.221	71.811	118.626	63.7218
NM_001000658	78.7315	86.6725	72.8542	86.0177	64.4372	56.0437	68.0955	52.7939	84.2024	61.502	41.2984	66.5231	85.4794	100.771	68.075	50.1694	50.5938
NM_001000659	54.597	47.7287	43.0277	50.9188	52.4407	48.8729	43.9304	36.4923	58.286	42.7304	41.2984	45.5378	54.2365	60.8931	48.9636	37.8455	60.724
NM_001000660	121.754	123.906	102.131	174.59	84.9701	56.5769	53.2433	61.7091	130.681	88.7379	125.931	89.1969	129.189	109.274	53.8747	79.3622	56.121
NM_001000661	73.9829	77.5001	71.6445	71.4399	66.9457	58.0429	52.7917	48.3401	52.3949	73.6307	66.0638	49.5866	79.4069	76.1259	45.1286	51.952	55.9241
NM_001000662	67.0251	80.7988	72.6074	61.8707	62.4008	64.8318	52.6577	47.9626	95.2438	67.7569	55.5708	69.6009	95.442	72.8131	55.3998	75.7127	55.9782
NM_001000663	78.1012	57.894	52.9786	42.4461	57.2094	84.6619	45.7379	56.1425	46.5192	60.6105	51.5382	60.4614	59.7891	64.1375	46.3529	45.9878	58.8101
NM_001000664	193.275	204.92	131.101	564.241	156.741	113.994	161.99	58.7368	215.313	168.69	69.859	160.124	162.556	313.747	132.469	215.701	86.5564
NM_001000665	162.714	87.4869	99.4493	83.8741	70.6397	45.5057	49.704	38.6523	78.4269	94.8671	54.1082	63.4451	57.9411	79.2721	63.0929	79.9598	46.0225
NM_001000666	207.699	226.247	127.844	154.617	157.842	131.172	112.269	168.212	175.842	109.671	146.862	139.095	386.197	224.218	203.8	161.378	138.758
NM_001000667	57.954	88.3699	59.2549	46.7827	79.5832	42.8182	47.8184	45.0405	66.6355	52.7435	42.8049	43.5908	69.8919	68.7749	42.6764	52.8326	56.1763
NM_001000668	46.2466	49.3667	74.065	111.855	48.2803	55.404	51.0388	166.192	67.6278	54.5588	53.09	43.2893	57.3947	58.0087	41.2022	55.4583	38.2828
NM_001000669	72.0933	74.2	74.9826	51.3015	88.9078	58.2665	43.3003	53.6726	51.6577	50.1908	63.824	55.2566	71.3766	70.3337	47.4414	63.4954	66.9574
NM_001000670	203.727	171.801	168.871	194.811	105.276	89.5325	81.6073	51.6639	90.2418	161.119	64.6116	100.556	61.1773	144.315	82.2448	139.777	104.788
NM_001000671	61.0624	53.3224	40.4176	45.3008	52.1893	38.7442	41.506	46.6991	47.621	41.6021	50.5813	41.8897	49.9732	44.3329	51.2753	47.4125	43.986
NM_001000672	86.1972	85.8429	59.581	71.8832	96.2067	95.4141	61.914	53.1603	90.4934	91.7203	53.8835	56.8348	60.617	84.2479	70.8165	66.7364	50.9029
NM_001000673	56.9699	65.2122	66.2661	43.6463	72.971	50.6165	41.4979	45.0962	72.5117	48.8204	47.0489	50.6445	49.9249	60.893	75.5262	50.816	55.886
NM_001000674	189.758	179.131	65.3268	136.066	152.881	125.956	83.1839	76.9151	187.944	86.7887	82.9024	75.7184	160.957	185.691	84.0382	86.8324	129.461
NM_001000675	143.438	186.304	148.351	153.82	147.969	82.6702	82.9732	74.6297	154.553	106.903	47.2444	77.6911	76.8844	150.141	66.0003	96.6618	38.0212
NM_001000676	75.6815	94.2515	161.836	165.544	68.7912	89.9859	83.0972	95.4069	66.3486	141.095	110.974	81.1807	100.061	148.021	74.5107	89.1711	77.4733
NM_001000677	60.7139	57.989	50.3426	57.0341	60.2779	61.9717	40.8724	46.9743	62.0365	41.0746	58.3889	38.9237	55.6799	84.5905	59.7258	52.6869	53.633
NM_001000678	71.1539	84.4827	70.7051	74.3361	84.4139	53.77	65.8685	88.356	98.4886	60.7752	81.3663	61.1068	96.2751	101.561	75.5639	72.2622	64.1876
NM_001000679	174.506	136.897	80.0329	134.4	139.341	72.457	113.5	51.3896	116.025	82.7559	71.6011	49.0196	180.438	114.405	70.6236	81.0533	52.0821
NM_001000680	168.296	123.068	191.116	140.478	195.646	157.091	86.8078	141.685	148.023	85.5764	115.484	104.674	139.999	169.72	109.829	107.824	189.065
NM_001000681	83.936	73.0334	71.6028	70.7245	71.2821	77.6958	47.2472	54.5186	75.1296	64.2137	52.3276	47.1787	69.8056	61.5745	54.8786	80.0276	134.837
NM_001000682	52.9303	62.8414	53.1508	42.2868	56.0623	37.5016	34.6349	42.8979	57.5328	42.0866	35.1828	41.9541	43.5243	60.8571	45.6702	43.9479	51.6801
NM_001000683	108.576	104.079	138.087	165.776	100.346	92.2431	107.675	90.6079	90.9684	124.431	85.1657	73.7276	72.0571	160.365	75.8085	94.2952	84.9226
NM_001000684	105.692	76.8659	58.8473	62.2301	80.9488	83.7921	52.1994	55.3948	79.1981	62.9829	61.1222	57.6673	85.4318	107.655	70.318	65.0407	39.3812
NM_001000685	55.8766	43.1593	44.8388	48.064	51.155	42.0904	34.7178	62.5077	52.9139	42.9066	37.8149	39.4524	72.8855	51.3318	44.9603	39.7478	46.5481
NM_001000686	91.6713	85.0253	76.1669	77.7966	118.911	45.917	137.051	74.9447	68.7668	62.7455	72.4125	58.7349	95.887	136.652	51.9877	67.5307	74.2491
NM_001000687	458.304	87.7996	70.7477	56.9711	136.224	65.019	56.1966	88.0296	79.9092	60.6823	50.4843	62.8034	105.677	161.776	46.2113	68.6465	49.0731
NM_001000688	133.994	126.19	63.203	72.2742	106.184	63.7141	94.0159	65.3105	84.8418	58.8306	57.6011	45.1661	124.402	212.854	93.7125	65.7854	72.7059
NM_001000689	274.704	845.288	408.485	574.097	678.546	503.269	364.731	261.671	768.715	371.194	252.135	271.209	454.889	544.843	256.803	394.27	374.965
NM_001000690	115.018	122.762	80.8716	108.402	98.6511	55.8573	82.9802	85.6476	74.0694	87.9108	93.7811	55.3055	65.1949	82.5166	73.3224	73.8411	67.9371
NM_001000691	108.319	77.5355	66.9906	58.3232	52.7815	44.6651	52.2778	33.7279	61.8549	55.521	38.3277	41.0602	43.055	65.7962	39.3025	51.1699	46.1235
NM_001000692	133.469	271.664	74.7429	202.632	98.6667	68.483	83.6905	86.1907	128.833	108.519	72.3627	59.8756	94.631	207.128	70.3385	86.5437	71.2858
NM_001000693	75.8333	63.7014	60.847	47.0562	63.2561	62.4751	64.4209	64.6449	80.9129	52.236	46.781	42.0115	42.7988	69.7668	50.9324	53.1151	44.2082
NM_001000694	72.251	53.3505	62.056	44.4938	65.6089	59.6759	62.3045	50.7437	65.5312	59.1144	47.6713	51.0366	54.9761	64.7124	49.8288	89.5508	60.3443
NM_001000695	82.3937	69.8639	64.2517	63.8371	63.6287	57.0622	50.5188	58.9747	54.0521	57.2876	49.6552	47.2507	59.2999	72.7791	51.1734	49.8499	43.8165
NM_001000697	141.746	162.447	111.176	184.214	411.011	70.0271	61.5121	90.0311	132.349	98.8842	95.723	81.694	76.2087	147.956	100.148	145.299	85.6063
NM_001000698	111.328	134.567	93.6174	234.092	111.224	80.0883	149.489	225.507	113.619	118.64	141.172	78.584	189.232	120.828	89.638	188.297	116.645
NM_001000699	153.193	158.892	92.8757	114.846	69.6187	68.7079	73.8772	49.1945	153.244	67.9364	73.9235	58.1461	76.8533	143.326	54.1376	85.556	68.9226
NM_001000700	155.492	119.106	105.5	133.813	126.141	91.2661	74.4335	78.4577	79.8577	101.67	101.231	72.9491	248.978	135.078	72.1378	90.2183	109.326
NM_001000702	79.815	82.8424	74.1088	58.6703	86.4057	57.5853	49.6769	39.0541	62.659	61.1105	45.0578	41.2408	72.2066	71.3259	44.7981	47.404	43.7249
NM_001000703	99.2315	85.8171	80.795	97.658	78.7087	52.052	64.3795	52.768	86.9328	78.2449	66.1591	93.1324	64.9227	89.0174	62.9415	64.2671	69.3623
NM_001000704	132.109	79.9593	80.5678	88.1421	82.2604	52.599	46.9945	54.6228	55.0443	77.9977	67.1267	45.0778	71.1405	67.7882	57.2058	66.9749	55.4907
NM_001000705	73.2529	84.8484	74.28	72.5798	91.524	47.21	42.0073	46.1669	72.5976	68.496	48.6249	46.8197	73.7622	115.491	75.3869	62.8235	57.9601
NM_001000706	85.0663	154.822	92.6961	119.715	59.5413	52.5824	45.8755	58.6997	69.5165	106.35	58.0133	47.5714	59.198	64.3781	75.9963	54.9136	46.8645
NM_001000707	87.3231	89.6751	120.563	94.1034	85.285	77.0583	96.1291	139.622	128.905	107.78	76.9449	97.8156	131.329	112.669	68.6909	118.431	66.1463
NM_001000708	191.78	297.809	176.045	255.087	178.263	161.114	166.686	84.8797	99.8605	278.175	122.135	115.898	88.4822	164.323	176.849	183.68	192.681
NM_001000709	157.746	289.163	141.62	151.291	97.5576	94.272	89.4146	113.936	188.107	133.181	89.0624	88.1516	75.2412	148.146	90.5781	160.934	88.3999
NM_001000710	416.942	575.043	269.325	568.42	194.663	96.0173	149.914	93.5279	223.822	294.823	69.168	146.167	121.26	328.023	143.923	295.383	90.104
NM_001000711	244.587	250.178	186.28	316.011	172.04	125.166	193.944	119.675	186.624	146.993	164.238	122.628	282.863	159.546	84.2695	167.425	132.844
[truncated: 25,727 more rows]
