# Supplementary material for: Genetic regulatory subnetworks and key regulating genes in rat hippocampus perturbed by prenatal malnutrition: implications for major brain disorders
Source: Aging (Albany NY). 2020 May 11;12(9):8434–58. doi: 10.18632/aging.103150 (PMC7244046; doi:10.18632/aging.103150)
Supplement: Supplementary Table 10 [file aging-12-103150-s002.xlsx]

## Sheet: Blue
module	dataSetName	inGroups	pValue	Bonferroni	FDR	nCommonGenes	enrichmentRatio	effectiveSetSize	overlapGenes
blue	Zeisel background	Verge Zeisel cell markers|Cell type markers|BrainLists|Cell type marker enriched gene sets	1.82e-27	1.63e-26	1.63e-26	669	1.26151	6001	(More than 50 overlapping genes)
blue	Zeisel Astrocyte	Verge Zeisel cell markers|Cell type markers|BrainLists|Cell type marker enriched gene sets	0.206174	1	0.778477	11	1.3242	94	25230|26956|310201|170917|361018|171155|361749|315994|316275|259225|305540
blue	Zeisel Interneuron	Verge Zeisel cell markers|Cell type markers|BrainLists|Cell type marker enriched gene sets	0.375948	1	0.778477	15	1.1094	153	81635|140935|83589|25387|171113|81654|303831|24896|25721|24938|29731|65195|83578|25271|29744
blue	Zeisel Mural	Verge Zeisel cell markers|Cell type markers|BrainLists|Cell type marker enriched gene sets	0.406998	1	0.778477	6	1.17061	58	25289|300186|116641|64204|304268|361112
blue	Zeisel Oligodendrocyte	Verge Zeisel cell markers|Cell type markers|BrainLists|Cell type marker enriched gene sets	0.432487	1	0.778477	18	1.06086	192	309945|84468|499390|25356|362339|266605|298298|305177|366854|309172|114244|29637|305967|312437|25506|301067|192129|305923
blue	Zeisel CA1 Pyramidal Neurons	Verge Zeisel cell markers|Cell type markers|BrainLists|Cell type marker enriched gene sets	0.67527	1	0.940723	12	0.911344	149	54234|309207|29475|367171|25339|362950|84609|171093|192117|24831|25567|25609
blue	Zeisel Microglia	Verge Zeisel cell markers|Cell type markers|BrainLists|Cell type marker enriched gene sets	0.82883	1	0.940723	14	0.81242	195	140668|29427|29624|29185|29455|25059|25084|64459|114553|29337|360820|363930|366126|361537
blue	Zeisel Endothelia	Verge Zeisel cell markers|Cell type markers|BrainLists|Cell type marker enriched gene sets	0.836198	1	0.940723	11	0.787812	158	309035|94204|287534|25718|24954|299618|60357|29282|25648|50719|298683
blue	Zeisel Ependymal	Verge Zeisel cell markers|Cell type markers|BrainLists|Cell type marker enriched gene sets	0.997262	1	0.997262	6	0.413995	164	361824|654441|363096|192245|299920|29648

## Sheet: Pink
module	dataSetName	inGroups	pValue	Bonferroni	FDR	nCommonGenes	enrichmentRatio	effectiveSetSize	overlapGenes
pink	Zeisel background	Verge Zeisel cell markers|Cell type markers|BrainLists|Cell type marker enriched gene sets	6.76e-08	6.08e-07	6.08e-07	224	1.22719	5995	(More than 50 overlapping genes)
pink	Zeisel CA1 Pyramidal Neurons	Verge Zeisel cell markers|Cell type markers|BrainLists|Cell type marker enriched gene sets	0.0381828	0.343645	0.171823	9	1.98385	149	24171|117108|286974|24409|266668|29682|25547|81022|288611
pink	Zeisel Astrocyte	Verge Zeisel cell markers|Cell type markers|BrainLists|Cell type marker enriched gene sets	0.158331	1	0.474993	5	1.74701	94	306586|302669|297814|85273|29218
pink	Zeisel Mural	Verge Zeisel cell markers|Cell type markers|BrainLists|Cell type marker enriched gene sets	0.531224	1	0.983614	2	1.13254	58	25202|81762
pink	Zeisel Interneuron	Verge Zeisel cell markers|Cell type markers|BrainLists|Cell type marker enriched gene sets	0.689966	1	0.983614	4	0.85866	153	29162|50658|688843|29485
pink	Zeisel Oligodendrocyte	Verge Zeisel cell markers|Cell type markers|BrainLists|Cell type marker enriched gene sets	0.841491	1	0.983614	4	0.684245	192	116724|60443|58979|81681
pink	Zeisel Endothelia	Verge Zeisel cell markers|Cell type markers|BrainLists|Cell type marker enriched gene sets	0.864727	1	0.983614	3	0.623616	158	25164|290651|79428
pink	Zeisel Ependymal	Verge Zeisel cell markers|Cell type markers|BrainLists|Cell type marker enriched gene sets	0.962534	1	0.983614	2	0.400534	164	500118|25177
pink	Zeisel Microglia	Verge Zeisel cell markers|Cell type markers|BrainLists|Cell type marker enriched gene sets	0.983614	1	0.983614	2	0.336859	195	171503|303336

## Sheet: Salmon
module	dataSetName	inGroups	pValue	Bonferroni	FDR	nCommonGenes	enrichmentRatio	effectiveSetSize	overlapGenes
salmon	Zeisel background	Verge Zeisel cell markers|Cell type markers|BrainLists|Cell type marker enriched gene sets	6.54e-05	0.000588203	0.000588203	98	1.25638	5996	(More than 50 overlapping genes)
salmon	Zeisel CA1 Pyramidal Neurons	Verge Zeisel cell markers|Cell type markers|BrainLists|Cell type marker enriched gene sets	0.00324692	0.0292223	0.0146111	7	3.61134	149	66013|81820|445271|280670|192363|24598|306417
salmon	Zeisel Oligodendrocyte	Verge Zeisel cell markers|Cell type markers|BrainLists|Cell type marker enriched gene sets	0.457723	1	1	3	1.20109	192	29631|84013|117276
salmon	Zeisel Astrocyte	Verge Zeisel cell markers|Cell type markers|BrainLists|Cell type marker enriched gene sets	0.709747	1	1	1	0.817765	94	83805
salmon	Zeisel Interneuron	Verge Zeisel cell markers|Cell type markers|BrainLists|Cell type marker enriched gene sets	0.867321	1	1	1	0.502418	153	25248
salmon	Zeisel Ependymal	Verge Zeisel cell markers|Cell type markers|BrainLists|Cell type marker enriched gene sets	0.886919	1	1	1	0.465878	165	100361087
salmon	Zeisel Microglia	Verge Zeisel cell markers|Cell type markers|BrainLists|Cell type marker enriched gene sets	0.924236	1	1	1	0.394205	195	78963
salmon	Zeisel Endothelia	Verge Zeisel cell markers|Cell type markers|BrainLists|Cell type marker enriched gene sets	1	1	1	0	0	158	NA
salmon	Zeisel Mural	Verge Zeisel cell markers|Cell type markers|BrainLists|Cell type marker enriched gene sets	1	1	1	0	0	58	NA
